# Supplementary material for: Corticohippocampal circuit dysfunction in a mouse model of Dravet syndrome
Source: eLife. 2022 Feb 25;11:e69293. doi: 10.7554/eLife.69293 (PMC8920506; doi:10.7554/eLife.69293)
Supplement: Figure 1—source data 1. [file elife-69293-fig1-data1.xlsx]

## Sheet: spikes versus dF_F0
genotype	amplitude (dF/F0)	#AP total	#AP pulse 1	#AP pulse 2	#AP pulse 3	#AP pulse 4
Scn1a	2.47737	14	3	5	3	3
Scn1a	3.52423	9	2	3	3	1
Scn1a	0.416986	1	1	0	0	0
Scn1a	2.28362	5	1	2	2	0
Scn1a	0.240299	0	0	0	0	0
Scn1a	1.57585	3	0	2	1	0
Scn1a	0.267778	1	1	0	0	0
Scn1a	0.994367	2	2	0	0	0
Scn1a	2.12709	3	3	0	0	0
Scn1a	2.85244	3	3	0	0	0
Scn1a	3.47735	4	4	0	0	0
Scn1a	2.23777	3	1	1	1	0
Scn1a	7.1742	13	2	5	3	3
Scn1a	1.57207	3	1	1	1	0
Scn1a	0.475569	1	1	0	0	0
Scn1a	0	0	0	0	0	0
Scn1a	1.78443	4	1	2	1	0
Scn1a	0.2787	2	2	0	0	0
Scn1a	0.295254	3	3	0	0	0
Scn1a	0.253705	2	2	0	0	0
Scn1a	0.15219	0	0	0	0	0
Scn1a	0.129073	0	0	0	0	0
Scn1a	3.48762	5	5	0	0	0
Scn1a	2.08277	2	2	0	0	0
Scn1a	1.32783	1	1	0	0	0
Scn1a	2.06411	4	1	2	1	0
Scn1a	0	0	0	0	0	0
Scn1a	3.94483	7	2	2	2	1
WT	0.577492	1	1	0	0	0
WT	1.84221	5	1	2	1	1
WT	1.33158	4	1	1	1	1
WT	0.514779	1	0	1	0	0
WT	6.07114	12	2	3	4	3
WT	1.5536	3	3	0	0	0
WT	1.09266	2	2	0	0	0
WT	0.445158	1	1	0	0	0
WT	0	0	0	0	0	0
WT	1.9341	3	3	0	0	0
WT	2.51267	3	3	0	0	0
WT	0.546878	1	1	0	0	0
WT	6.78666	13	2	4	4	3
WT	3.66933	8	2	2	2	2
WT	5.22614	11	2	3	3	3

## Sheet: spikes vs dF_F0-1s & 0s, no PTX
genotype	amplitude	#AP total	#AP pulse 1	#AP pulse 2	#AP pulse 3	#AP pulse 4
Scn1a	0.0812492	0	0	0	0	0
Scn1a	0.323992	1	1	0	0	0
Scn1a	0	0	0	0	0	0
Scn1a	0.0807678	0	0	0	0	0
Scn1a	0.243506	1	1	0	0	0
Scn1a	0.187429	1	1	0	0	0
Scn1a	0.688223	1	1	0	0	0
Scn1a	0.0642944	0	0	0	0	0
Scn1a	0.0705005	0	0	0	0	0
Scn1a	0.290274	1	1	0	0	0
Scn1a	0.297082	1	1	0	0	0
Scn1a	0.271128	1	1	0	0	0
Scn1a	0.0641946	0	0	0	0	0
WT	0.346516	1	0	1	0	0
WT	0.212139	1	0	1	0	0
WT	0.109746	0	0	0	0	0
WT	0.0889183	0	0	0	0	0
WT	0.43149	1	0	1	0	0
WT	0	0	0	0	0	0

## Sheet: observed vs estimated spikes
genotype	amplitude	#AP total	#AP pulse 1	#AP pulse 2	#AP pulse 3	#AP pulse 4	Deconvolved Spikes total
Scn1a	2.47737	14	3	5	3	3	7
Scn1a	3.52423	9	2	3	3	1	7
Scn1a	0.416986	1	1	0	0	0	1
Scn1a	2.28362	5	1	2	2	0	4
Scn1a	0.240299	0	0	0	0	0	1
Scn1a	1.57585	3	0	2	1	0	3
Scn1a	0.267778	1	1	0	0	0	2
Scn1a	0.994367	2	2	0	0	0	2
Scn1a	2.12709	3	3	0	0	0	4
Scn1a	2.85244	3	3	0	0	0	4
Scn1a	3.47735	4	4	0	0	0	6
Scn1a	2.23777	3	1	1	1	0	3
Scn1a	7.1742	13	2	5	3	3	13
Scn1a	1.57207	3	1	1	1	0	2
Scn1a	0.475569	1	1	0	0	0	2
Scn1a	0	0	0	0	0	0	0
Scn1a	1.78443	4	1	2	1	0	2
Scn1a	0.2787	2	2	0	0	0	2
Scn1a	0.295254	3	3	0	0	0	1
Scn1a	0.253705	2	2	0	0	0	2
Scn1a	0.15219	0	0	0	0	0	0
Scn1a	0.129073	0	0	0	0	0	1
Scn1a	3.48762	5	5	0	0	0	6
Scn1a	2.08277	2	2	0	0	0	3
Scn1a	1.32783	1	1	0	0	0	5
Scn1a	2.06411	4	1	2	1	0	5
Scn1a	0	0	0	0	0	0	0
Scn1a	3.94483	7	2	2	2	1	8
WT	0.577492	1	1	0	0	0	2
WT	1.84221	5	1	2	1	1	3
WT	1.33158	4	1	1	1	1	2
WT	0.514779	1	0	1	0	0	1
WT	6.07114	12	2	3	4	3	11
WT	1.5536	3	3	0	0	0	2
WT	1.09266	2	2	0	0	0	2
WT	0.445158	1	1	0	0	0	2
WT	0	0	0	0	0	0	0
WT	1.9341	3	3	0	0	0	4
WT	2.51267	3	3	0	0	0	4
WT	0.546878	1	1	0	0	0	1
WT	6.78666	13	2	4	4	3	11
WT	3.66933	8	2	2	2	2	6
WT	5.22614	11	2	3	3	3	9
