# Supplementary material for: Corticohippocampal circuit dysfunction in a mouse model of Dravet syndrome
Source: eLife. 2022 Feb 25;11:e69293. doi: 10.7554/eLife.69293 (PMC8920506; doi:10.7554/eLife.69293)
Supplement: Figure 2—source data 1. [file elife-69293-fig2-data1.xlsx]

## Sheet: early postnatal - by cell
Genotype	age	mouse	slice	field	File name	condition	pulses	power	Cell Num	Activation	Amplitude
Scn1a	14	2136	1	1	TSeries-03082019-1159-022	4p_400	4	400	0	0
Scn1a	14	2136	1	1	TSeries-03082019-1159-022	4p_400	4	400	1	0
Scn1a	14	2136	1	1	TSeries-03082019-1159-022	4p_400	4	400	2	1	1.24768
Scn1a	14	2136	1	1	TSeries-03082019-1159-022	4p_400	4	400	3	1	0.264268
Scn1a	14	2136	1	1	TSeries-03082019-1159-022	4p_400	4	400	4	1	0.244935
Scn1a	14	2136	1	1	TSeries-03082019-1159-022	4p_400	4	400	5	0
Scn1a	14	2136	1	1	TSeries-03082019-1159-022	4p_400	4	400	6	0
Scn1a	14	2136	1	1	TSeries-03082019-1159-022	4p_400	4	400	7	0
Scn1a	14	2136	1	1	TSeries-03082019-1159-022	4p_400	4	400	8	1	0.32385
Scn1a	14	2136	1	1	TSeries-03082019-1159-022	4p_400	4	400	9	1	0.497545
Scn1a	14	2136	1	1	TSeries-03082019-1159-022	4p_400	4	400	10	0
Scn1a	14	2136	1	1	TSeries-03082019-1159-022	4p_400	4	400	11	0
Scn1a	14	2136	1	1	TSeries-03082019-1159-022	4p_400	4	400	12	1	0.379938
Scn1a	14	2136	1	1	TSeries-03082019-1159-022	4p_400	4	400	13	1	0.496432
Scn1a	14	2136	1	1	TSeries-03082019-1159-022	4p_400	4	400	14	1	0.3
Scn1a	14	2136	1	1	TSeries-03082019-1159-022	4p_400	4	400	15	0
Scn1a	14	2136	1	1	TSeries-03082019-1159-022	4p_400	4	400	16	1	0.223644
Scn1a	14	2136	1	1	TSeries-03082019-1159-023	1p_400	1	400	0	1	0.102309
Scn1a	14	2136	1	1	TSeries-03082019-1159-023	1p_400	1	400	1	0
Scn1a	14	2136	1	1	TSeries-03082019-1159-023	1p_400	1	400	2	1	0.155532
Scn1a	14	2136	1	1	TSeries-03082019-1159-023	1p_400	1	400	3	0
Scn1a	14	2136	1	1	TSeries-03082019-1159-023	1p_400	1	400	4	0
Scn1a	14	2136	1	1	TSeries-03082019-1159-023	1p_400	1	400	5	0
Scn1a	14	2136	1	1	TSeries-03082019-1159-023	1p_400	1	400	6	0
Scn1a	14	2136	1	1	TSeries-03082019-1159-023	1p_400	1	400	7	1	0.444862
Scn1a	14	2136	1	1	TSeries-03082019-1159-023	1p_400	1	400	8	0
Scn1a	14	2136	1	1	TSeries-03082019-1159-023	1p_400	1	400	9	1	0.599887
Scn1a	14	2136	1	1	TSeries-03082019-1159-023	1p_400	1	400	10	0
Scn1a	14	2136	1	1	TSeries-03082019-1159-023	1p_400	1	400	11	0
Scn1a	14	2136	1	1	TSeries-03082019-1159-023	1p_400	1	400	12	0
Scn1a	14	2136	1	1	TSeries-03082019-1159-023	1p_400	1	400	13	0
Scn1a	14	2136	1	1	TSeries-03082019-1159-023	1p_400	1	400	14	0
Scn1a	14	2136	1	1	TSeries-03082019-1159-023	1p_400	1	400	15	0
Scn1a	14	2136	1	1	TSeries-03082019-1159-023	1p_400	1	400	16	1	0.123537
Scn1a	14	2136	1	1	TSeries-03082019-1159-027	4p_200	4	200	0	0
Scn1a	14	2136	1	1	TSeries-03082019-1159-027	4p_200	4	200	1	0
Scn1a	14	2136	1	1	TSeries-03082019-1159-027	4p_200	4	200	2	0
Scn1a	14	2136	1	1	TSeries-03082019-1159-027	4p_200	4	200	3	0
Scn1a	14	2136	1	1	TSeries-03082019-1159-027	4p_200	4	200	4	0
Scn1a	14	2136	1	1	TSeries-03082019-1159-027	4p_200	4	200	5	0
Scn1a	14	2136	1	1	TSeries-03082019-1159-027	4p_200	4	200	6	0
Scn1a	14	2136	1	1	TSeries-03082019-1159-027	4p_200	4	200	7	0
Scn1a	14	2136	1	1	TSeries-03082019-1159-027	4p_200	4	200	8	0
Scn1a	14	2136	1	1	TSeries-03082019-1159-027	4p_200	4	200	9	0
Scn1a	14	2136	1	1	TSeries-03082019-1159-027	4p_200	4	200	10	0
Scn1a	14	2136	1	1	TSeries-03082019-1159-027	4p_200	4	200	11	0
Scn1a	14	2136	1	1	TSeries-03082019-1159-027	4p_200	4	200	12	0
Scn1a	14	2136	1	1	TSeries-03082019-1159-027	4p_200	4	200	13	0
Scn1a	14	2136	1	1	TSeries-03082019-1159-027	4p_200	4	200	14	0
Scn1a	14	2136	1	1	TSeries-03082019-1159-027	4p_200	4	200	15	0
Scn1a	14	2136	1	1	TSeries-03082019-1159-027	4p_200	4	200	16	0
Scn1a	14	2136	1	1	TSeries-03082019-1159-028	4p_100	4	100	0	0
Scn1a	14	2136	1	1	TSeries-03082019-1159-028	4p_100	4	100	1	0
Scn1a	14	2136	1	1	TSeries-03082019-1159-028	4p_100	4	100	2	0
Scn1a	14	2136	1	1	TSeries-03082019-1159-028	4p_100	4	100	3	0
Scn1a	14	2136	1	1	TSeries-03082019-1159-028	4p_100	4	100	4	0
Scn1a	14	2136	1	1	TSeries-03082019-1159-028	4p_100	4	100	5	0
Scn1a	14	2136	1	1	TSeries-03082019-1159-028	4p_100	4	100	6	0
Scn1a	14	2136	1	1	TSeries-03082019-1159-028	4p_100	4	100	7	0
Scn1a	14	2136	1	1	TSeries-03082019-1159-028	4p_100	4	100	8	0
Scn1a	14	2136	1	1	TSeries-03082019-1159-028	4p_100	4	100	9	0
Scn1a	14	2136	1	1	TSeries-03082019-1159-028	4p_100	4	100	10	0
Scn1a	14	2136	1	1	TSeries-03082019-1159-028	4p_100	4	100	11	0
Scn1a	14	2136	1	1	TSeries-03082019-1159-028	4p_100	4	100	12	0
Scn1a	14	2136	1	1	TSeries-03082019-1159-028	4p_100	4	100	13	0
Scn1a	14	2136	1	1	TSeries-03082019-1159-028	4p_100	4	100	14	0
Scn1a	14	2136	1	1	TSeries-03082019-1159-028	4p_100	4	100	15	0
Scn1a	14	2136	1	1	TSeries-03082019-1159-028	4p_100	4	100	16	0
Scn1a	14	2136	1	1	TSeries-03082019-1159-029	4p_50	4	50	0	0
Scn1a	14	2136	1	1	TSeries-03082019-1159-029	4p_50	4	50	1	0
Scn1a	14	2136	1	1	TSeries-03082019-1159-029	4p_50	4	50	2	0
Scn1a	14	2136	1	1	TSeries-03082019-1159-029	4p_50	4	50	3	0
Scn1a	14	2136	1	1	TSeries-03082019-1159-029	4p_50	4	50	4	0
Scn1a	14	2136	1	1	TSeries-03082019-1159-029	4p_50	4	50	5	0
Scn1a	14	2136	1	1	TSeries-03082019-1159-029	4p_50	4	50	6	0
Scn1a	14	2136	1	1	TSeries-03082019-1159-029	4p_50	4	50	7	0
Scn1a	14	2136	1	1	TSeries-03082019-1159-029	4p_50	4	50	8	0
Scn1a	14	2136	1	1	TSeries-03082019-1159-029	4p_50	4	50	9	0
Scn1a	14	2136	1	1	TSeries-03082019-1159-029	4p_50	4	50	10	0
Scn1a	14	2136	1	1	TSeries-03082019-1159-029	4p_50	4	50	11	0
Scn1a	14	2136	1	1	TSeries-03082019-1159-029	4p_50	4	50	12	0
Scn1a	14	2136	1	1	TSeries-03082019-1159-029	4p_50	4	50	13	0
Scn1a	14	2136	1	1	TSeries-03082019-1159-029	4p_50	4	50	14	0
Scn1a	14	2136	1	1	TSeries-03082019-1159-029	4p_50	4	50	15	0
Scn1a	14	2136	1	1	TSeries-03082019-1159-029	4p_50	4	50	16	0
Scn1a	14	2136	1	1	TSeries-03082019-1159-030	4p_25	4	25	0	0
Scn1a	14	2136	1	1	TSeries-03082019-1159-030	4p_25	4	25	1	0
Scn1a	14	2136	1	1	TSeries-03082019-1159-030	4p_25	4	25	2	0
Scn1a	14	2136	1	1	TSeries-03082019-1159-030	4p_25	4	25	3	0
Scn1a	14	2136	1	1	TSeries-03082019-1159-030	4p_25	4	25	4	0
Scn1a	14	2136	1	1	TSeries-03082019-1159-030	4p_25	4	25	5	0
Scn1a	14	2136	1	1	TSeries-03082019-1159-030	4p_25	4	25	6	0
Scn1a	14	2136	1	1	TSeries-03082019-1159-030	4p_25	4	25	7	0
Scn1a	14	2136	1	1	TSeries-03082019-1159-030	4p_25	4	25	8	0
Scn1a	14	2136	1	1	TSeries-03082019-1159-030	4p_25	4	25	9	0
Scn1a	14	2136	1	1	TSeries-03082019-1159-030	4p_25	4	25	10	0
Scn1a	14	2136	1	1	TSeries-03082019-1159-030	4p_25	4	25	11	0
Scn1a	14	2136	1	1	TSeries-03082019-1159-030	4p_25	4	25	12	0
Scn1a	14	2136	1	1	TSeries-03082019-1159-030	4p_25	4	25	13	0
Scn1a	14	2136	1	1	TSeries-03082019-1159-030	4p_25	4	25	14	0
Scn1a	14	2136	1	1	TSeries-03082019-1159-030	4p_25	4	25	15	0
Scn1a	14	2136	1	1	TSeries-03082019-1159-030	4p_25	4	25	16	0
Scn1a	14	2136	1	1	TSeries-03082019-1159-031	1p_200	1	200	0	0
Scn1a	14	2136	1	1	TSeries-03082019-1159-031	1p_200	1	200	1	0
Scn1a	14	2136	1	1	TSeries-03082019-1159-031	1p_200	1	200	2	0
Scn1a	14	2136	1	1	TSeries-03082019-1159-031	1p_200	1	200	3	0
Scn1a	14	2136	1	1	TSeries-03082019-1159-031	1p_200	1	200	4	0
Scn1a	14	2136	1	1	TSeries-03082019-1159-031	1p_200	1	200	5	0
Scn1a	14	2136	1	1	TSeries-03082019-1159-031	1p_200	1	200	6	0
Scn1a	14	2136	1	1	TSeries-03082019-1159-031	1p_200	1	200	7	0
Scn1a	14	2136	1	1	TSeries-03082019-1159-031	1p_200	1	200	8	0
Scn1a	14	2136	1	1	TSeries-03082019-1159-031	1p_200	1	200	9	0
Scn1a	14	2136	1	1	TSeries-03082019-1159-031	1p_200	1	200	10	0
Scn1a	14	2136	1	1	TSeries-03082019-1159-031	1p_200	1	200	11	0
Scn1a	14	2136	1	1	TSeries-03082019-1159-031	1p_200	1	200	12	0
Scn1a	14	2136	1	1	TSeries-03082019-1159-031	1p_200	1	200	13	0
Scn1a	14	2136	1	1	TSeries-03082019-1159-031	1p_200	1	200	14	0
Scn1a	14	2136	1	1	TSeries-03082019-1159-031	1p_200	1	200	15	0
Scn1a	14	2136	1	1	TSeries-03082019-1159-031	1p_200	1	200	16	0
Scn1a	14	2136	1	1	TSeries-03082019-1159-032	1p_100	1	100	0	0
Scn1a	14	2136	1	1	TSeries-03082019-1159-032	1p_100	1	100	1	0
Scn1a	14	2136	1	1	TSeries-03082019-1159-032	1p_100	1	100	2	0
Scn1a	14	2136	1	1	TSeries-03082019-1159-032	1p_100	1	100	3	0
Scn1a	14	2136	1	1	TSeries-03082019-1159-032	1p_100	1	100	4	0
Scn1a	14	2136	1	1	TSeries-03082019-1159-032	1p_100	1	100	5	0
Scn1a	14	2136	1	1	TSeries-03082019-1159-032	1p_100	1	100	6	0
Scn1a	14	2136	1	1	TSeries-03082019-1159-032	1p_100	1	100	7	0
Scn1a	14	2136	1	1	TSeries-03082019-1159-032	1p_100	1	100	8	0
Scn1a	14	2136	1	1	TSeries-03082019-1159-032	1p_100	1	100	9	0
Scn1a	14	2136	1	1	TSeries-03082019-1159-032	1p_100	1	100	10	0
Scn1a	14	2136	1	1	TSeries-03082019-1159-032	1p_100	1	100	11	1	0.281243
Scn1a	14	2136	1	1	TSeries-03082019-1159-032	1p_100	1	100	12	0
Scn1a	14	2136	1	1	TSeries-03082019-1159-032	1p_100	1	100	13	0
Scn1a	14	2136	1	1	TSeries-03082019-1159-032	1p_100	1	100	14	0
Scn1a	14	2136	1	1	TSeries-03082019-1159-032	1p_100	1	100	15	0
Scn1a	14	2136	1	1	TSeries-03082019-1159-032	1p_100	1	100	16	0
Scn1a	14	2136	1	1	TSeries-03082019-1159-033	1p_50	1	50	0	0
Scn1a	14	2136	1	1	TSeries-03082019-1159-033	1p_50	1	50	1	0
Scn1a	14	2136	1	1	TSeries-03082019-1159-033	1p_50	1	50	2	0
Scn1a	14	2136	1	1	TSeries-03082019-1159-033	1p_50	1	50	3	0
Scn1a	14	2136	1	1	TSeries-03082019-1159-033	1p_50	1	50	4	0
Scn1a	14	2136	1	1	TSeries-03082019-1159-033	1p_50	1	50	5	0
Scn1a	14	2136	1	1	TSeries-03082019-1159-033	1p_50	1	50	6	0
Scn1a	14	2136	1	1	TSeries-03082019-1159-033	1p_50	1	50	7	0
Scn1a	14	2136	1	1	TSeries-03082019-1159-033	1p_50	1	50	8	0
Scn1a	14	2136	1	1	TSeries-03082019-1159-033	1p_50	1	50	9	0
Scn1a	14	2136	1	1	TSeries-03082019-1159-033	1p_50	1	50	10	0
Scn1a	14	2136	1	1	TSeries-03082019-1159-033	1p_50	1	50	11	0
Scn1a	14	2136	1	1	TSeries-03082019-1159-033	1p_50	1	50	12	0
Scn1a	14	2136	1	1	TSeries-03082019-1159-033	1p_50	1	50	13	0
Scn1a	14	2136	1	1	TSeries-03082019-1159-033	1p_50	1	50	14	0
Scn1a	14	2136	1	1	TSeries-03082019-1159-033	1p_50	1	50	15	0
Scn1a	14	2136	1	1	TSeries-03082019-1159-033	1p_50	1	50	16	0
Scn1a	14	2136	1	1	TSeries-03082019-1159-034	1p_25	1	25	0	0
Scn1a	14	2136	1	1	TSeries-03082019-1159-034	1p_25	1	25	1	0
Scn1a	14	2136	1	1	TSeries-03082019-1159-034	1p_25	1	25	2	0
Scn1a	14	2136	1	1	TSeries-03082019-1159-034	1p_25	1	25	3	0
Scn1a	14	2136	1	1	TSeries-03082019-1159-034	1p_25	1	25	4	0
Scn1a	14	2136	1	1	TSeries-03082019-1159-034	1p_25	1	25	5	0
Scn1a	14	2136	1	1	TSeries-03082019-1159-034	1p_25	1	25	6	0
Scn1a	14	2136	1	1	TSeries-03082019-1159-034	1p_25	1	25	7	0
Scn1a	14	2136	1	1	TSeries-03082019-1159-034	1p_25	1	25	8	0
Scn1a	14	2136	1	1	TSeries-03082019-1159-034	1p_25	1	25	9	0
Scn1a	14	2136	1	1	TSeries-03082019-1159-034	1p_25	1	25	10	0
Scn1a	14	2136	1	1	TSeries-03082019-1159-034	1p_25	1	25	11	1	0.154669
Scn1a	14	2136	1	1	TSeries-03082019-1159-034	1p_25	1	25	12	0
Scn1a	14	2136	1	1	TSeries-03082019-1159-034	1p_25	1	25	13	0
Scn1a	14	2136	1	1	TSeries-03082019-1159-034	1p_25	1	25	14	0
Scn1a	14	2136	1	1	TSeries-03082019-1159-034	1p_25	1	25	15	0
Scn1a	14	2136	1	1	TSeries-03082019-1159-034	1p_25	1	25	16	0
Scn1a	14	2136	1	2	TSeries-03082019-1159-035	4p_400	4	400	0	0
Scn1a	14	2136	1	2	TSeries-03082019-1159-035	4p_400	4	400	1	0
Scn1a	14	2136	1	2	TSeries-03082019-1159-035	4p_400	4	400	2	1	0.942013
Scn1a	14	2136	1	2	TSeries-03082019-1159-035	4p_400	4	400	3	1	0.485766
Scn1a	14	2136	1	2	TSeries-03082019-1159-035	4p_400	4	400	4	1	0.818863
Scn1a	14	2136	1	2	TSeries-03082019-1159-035	4p_400	4	400	5	1	0.826603
Scn1a	14	2136	1	2	TSeries-03082019-1159-035	4p_400	4	400	6	1	1.79376
Scn1a	14	2136	1	2	TSeries-03082019-1159-035	4p_400	4	400	7	1	1.92259
Scn1a	14	2136	1	2	TSeries-03082019-1159-035	4p_400	4	400	8	1	1.61804
Scn1a	14	2136	1	2	TSeries-03082019-1159-035	4p_400	4	400	9	1	1.54581
Scn1a	14	2136	1	2	TSeries-03082019-1159-035	4p_400	4	400	10	1	1.47422
Scn1a	14	2136	1	2	TSeries-03082019-1159-035	4p_400	4	400	11	1	0.566108
Scn1a	14	2136	1	2	TSeries-03082019-1159-035	4p_400	4	400	12	1	0.279026
Scn1a	14	2136	1	2	TSeries-03082019-1159-035	4p_400	4	400	13	1	0.296324
Scn1a	14	2136	1	2	TSeries-03082019-1159-035	4p_400	4	400	14	1	1.74564
Scn1a	14	2136	1	2	TSeries-03082019-1159-035	4p_400	4	400	15	1	1.88816
Scn1a	14	2136	1	2	TSeries-03082019-1159-035	4p_400	4	400	16	1	1.71366
Scn1a	14	2136	1	2	TSeries-03082019-1159-035	4p_400	4	400	17	1	1.09411
Scn1a	14	2136	1	2	TSeries-03082019-1159-035	4p_400	4	400	18	1	0.632025
Scn1a	14	2136	1	2	TSeries-03082019-1159-035	4p_400	4	400	19	0
Scn1a	14	2136	1	2	TSeries-03082019-1159-035	4p_400	4	400	20	0
Scn1a	14	2136	1	2	TSeries-03082019-1159-036	4p_200	4	200	0	0
Scn1a	14	2136	1	2	TSeries-03082019-1159-036	4p_200	4	200	1	0
Scn1a	14	2136	1	2	TSeries-03082019-1159-036	4p_200	4	200	2	1	0.493601
Scn1a	14	2136	1	2	TSeries-03082019-1159-036	4p_200	4	200	3	1	0.370829
Scn1a	14	2136	1	2	TSeries-03082019-1159-036	4p_200	4	200	4	1	0.436728
Scn1a	14	2136	1	2	TSeries-03082019-1159-036	4p_200	4	200	5	1	0.742778
Scn1a	14	2136	1	2	TSeries-03082019-1159-036	4p_200	4	200	6	1	0.934128
Scn1a	14	2136	1	2	TSeries-03082019-1159-036	4p_200	4	200	7	1	1.30413
Scn1a	14	2136	1	2	TSeries-03082019-1159-036	4p_200	4	200	8	1	0.645984
Scn1a	14	2136	1	2	TSeries-03082019-1159-036	4p_200	4	200	9	1	0.293837
Scn1a	14	2136	1	2	TSeries-03082019-1159-036	4p_200	4	200	10	1	1.14912
Scn1a	14	2136	1	2	TSeries-03082019-1159-036	4p_200	4	200	11	1	0.327222
Scn1a	14	2136	1	2	TSeries-03082019-1159-036	4p_200	4	200	12	1	0.178331
Scn1a	14	2136	1	2	TSeries-03082019-1159-036	4p_200	4	200	13	0
Scn1a	14	2136	1	2	TSeries-03082019-1159-036	4p_200	4	200	14	1	1.06815
Scn1a	14	2136	1	2	TSeries-03082019-1159-036	4p_200	4	200	15	1	1.27074
Scn1a	14	2136	1	2	TSeries-03082019-1159-036	4p_200	4	200	16	1	1.08021
Scn1a	14	2136	1	2	TSeries-03082019-1159-036	4p_200	4	200	17	1	1.06299
Scn1a	14	2136	1	2	TSeries-03082019-1159-036	4p_200	4	200	18	1	0.207852
Scn1a	14	2136	1	2	TSeries-03082019-1159-036	4p_200	4	200	19	1	0.157545
Scn1a	14	2136	1	2	TSeries-03082019-1159-036	4p_200	4	200	20	0
Scn1a	14	2136	1	2	TSeries-03082019-1159-037	4p_100	4	100	0	0
Scn1a	14	2136	1	2	TSeries-03082019-1159-037	4p_100	4	100	1	0
Scn1a	14	2136	1	2	TSeries-03082019-1159-037	4p_100	4	100	2	0
Scn1a	14	2136	1	2	TSeries-03082019-1159-037	4p_100	4	100	3	0
Scn1a	14	2136	1	2	TSeries-03082019-1159-037	4p_100	4	100	4	1	0.22966
Scn1a	14	2136	1	2	TSeries-03082019-1159-037	4p_100	4	100	5	1	0.432128
Scn1a	14	2136	1	2	TSeries-03082019-1159-037	4p_100	4	100	6	1	0.157218
Scn1a	14	2136	1	2	TSeries-03082019-1159-037	4p_100	4	100	7	1	0.137419
Scn1a	14	2136	1	2	TSeries-03082019-1159-037	4p_100	4	100	8	0
Scn1a	14	2136	1	2	TSeries-03082019-1159-037	4p_100	4	100	9	0
Scn1a	14	2136	1	2	TSeries-03082019-1159-037	4p_100	4	100	10	0
Scn1a	14	2136	1	2	TSeries-03082019-1159-037	4p_100	4	100	11	0
Scn1a	14	2136	1	2	TSeries-03082019-1159-037	4p_100	4	100	12	0
Scn1a	14	2136	1	2	TSeries-03082019-1159-037	4p_100	4	100	13	0
Scn1a	14	2136	1	2	TSeries-03082019-1159-037	4p_100	4	100	14	1	0.642875
Scn1a	14	2136	1	2	TSeries-03082019-1159-037	4p_100	4	100	15	1	0.686254
Scn1a	14	2136	1	2	TSeries-03082019-1159-037	4p_100	4	100	16	1	0.121875
Scn1a	14	2136	1	2	TSeries-03082019-1159-037	4p_100	4	100	17	1	0.452435
Scn1a	14	2136	1	2	TSeries-03082019-1159-037	4p_100	4	100	18	0
Scn1a	14	2136	1	2	TSeries-03082019-1159-037	4p_100	4	100	19	0
Scn1a	14	2136	1	2	TSeries-03082019-1159-037	4p_100	4	100	20	0
Scn1a	14	2136	1	2	TSeries-03082019-1159-038	4p_50	4	50	0	0
Scn1a	14	2136	1	2	TSeries-03082019-1159-038	4p_50	4	50	1	0
Scn1a	14	2136	1	2	TSeries-03082019-1159-038	4p_50	4	50	2	0
Scn1a	14	2136	1	2	TSeries-03082019-1159-038	4p_50	4	50	3	0
Scn1a	14	2136	1	2	TSeries-03082019-1159-038	4p_50	4	50	4	0
Scn1a	14	2136	1	2	TSeries-03082019-1159-038	4p_50	4	50	5	0
Scn1a	14	2136	1	2	TSeries-03082019-1159-038	4p_50	4	50	6	0
Scn1a	14	2136	1	2	TSeries-03082019-1159-038	4p_50	4	50	7	0
Scn1a	14	2136	1	2	TSeries-03082019-1159-038	4p_50	4	50	8	0
Scn1a	14	2136	1	2	TSeries-03082019-1159-038	4p_50	4	50	9	0
Scn1a	14	2136	1	2	TSeries-03082019-1159-038	4p_50	4	50	10	0
Scn1a	14	2136	1	2	TSeries-03082019-1159-038	4p_50	4	50	11	0
Scn1a	14	2136	1	2	TSeries-03082019-1159-038	4p_50	4	50	12	0
Scn1a	14	2136	1	2	TSeries-03082019-1159-038	4p_50	4	50	13	0
Scn1a	14	2136	1	2	TSeries-03082019-1159-038	4p_50	4	50	14	0
Scn1a	14	2136	1	2	TSeries-03082019-1159-038	4p_50	4	50	15	0
Scn1a	14	2136	1	2	TSeries-03082019-1159-038	4p_50	4	50	16	0
Scn1a	14	2136	1	2	TSeries-03082019-1159-038	4p_50	4	50	17	0
Scn1a	14	2136	1	2	TSeries-03082019-1159-038	4p_50	4	50	18	0
Scn1a	14	2136	1	2	TSeries-03082019-1159-038	4p_50	4	50	19	0
Scn1a	14	2136	1	2	TSeries-03082019-1159-038	4p_50	4	50	20	0
Scn1a	14	2136	1	2	TSeries-03082019-1159-039	4p_25	4	25	0	0
Scn1a	14	2136	1	2	TSeries-03082019-1159-039	4p_25	4	25	1	0
Scn1a	14	2136	1	2	TSeries-03082019-1159-039	4p_25	4	25	2	0
Scn1a	14	2136	1	2	TSeries-03082019-1159-039	4p_25	4	25	3	0
Scn1a	14	2136	1	2	TSeries-03082019-1159-039	4p_25	4	25	4	0
Scn1a	14	2136	1	2	TSeries-03082019-1159-039	4p_25	4	25	5	0
Scn1a	14	2136	1	2	TSeries-03082019-1159-039	4p_25	4	25	6	0
Scn1a	14	2136	1	2	TSeries-03082019-1159-039	4p_25	4	25	7	0
Scn1a	14	2136	1	2	TSeries-03082019-1159-039	4p_25	4	25	8	0
Scn1a	14	2136	1	2	TSeries-03082019-1159-039	4p_25	4	25	9	0
Scn1a	14	2136	1	2	TSeries-03082019-1159-039	4p_25	4	25	10	0
Scn1a	14	2136	1	2	TSeries-03082019-1159-039	4p_25	4	25	11	0
Scn1a	14	2136	1	2	TSeries-03082019-1159-039	4p_25	4	25	12	0
Scn1a	14	2136	1	2	TSeries-03082019-1159-039	4p_25	4	25	13	0
Scn1a	14	2136	1	2	TSeries-03082019-1159-039	4p_25	4	25	14	0
Scn1a	14	2136	1	2	TSeries-03082019-1159-039	4p_25	4	25	15	0
Scn1a	14	2136	1	2	TSeries-03082019-1159-039	4p_25	4	25	16	0
Scn1a	14	2136	1	2	TSeries-03082019-1159-039	4p_25	4	25	17	0
Scn1a	14	2136	1	2	TSeries-03082019-1159-039	4p_25	4	25	18	0
Scn1a	14	2136	1	2	TSeries-03082019-1159-039	4p_25	4	25	19	0
Scn1a	14	2136	1	2	TSeries-03082019-1159-039	4p_25	4	25	20	0
Scn1a	14	2136	1	2	TSeries-03082019-1159-040	1p_400	1	400	0	0
Scn1a	14	2136	1	2	TSeries-03082019-1159-040	1p_400	1	400	1	0
Scn1a	14	2136	1	2	TSeries-03082019-1159-040	1p_400	1	400	2	1	0.314925
Scn1a	14	2136	1	2	TSeries-03082019-1159-040	1p_400	1	400	3	1	0.125733
Scn1a	14	2136	1	2	TSeries-03082019-1159-040	1p_400	1	400	4	1	0.178422
Scn1a	14	2136	1	2	TSeries-03082019-1159-040	1p_400	1	400	5	1	0.421502
Scn1a	14	2136	1	2	TSeries-03082019-1159-040	1p_400	1	400	6	1	0.469495
Scn1a	14	2136	1	2	TSeries-03082019-1159-040	1p_400	1	400	7	1	0.638779
Scn1a	14	2136	1	2	TSeries-03082019-1159-040	1p_400	1	400	8	1	0.418596
Scn1a	14	2136	1	2	TSeries-03082019-1159-040	1p_400	1	400	9	1	0.576293
Scn1a	14	2136	1	2	TSeries-03082019-1159-040	1p_400	1	400	10	1	0.472765
Scn1a	14	2136	1	2	TSeries-03082019-1159-040	1p_400	1	400	11	1	0.230826
Scn1a	14	2136	1	2	TSeries-03082019-1159-040	1p_400	1	400	12	0
Scn1a	14	2136	1	2	TSeries-03082019-1159-040	1p_400	1	400	13	1	0.300962
Scn1a	14	2136	1	2	TSeries-03082019-1159-040	1p_400	1	400	14	1	0.487498
Scn1a	14	2136	1	2	TSeries-03082019-1159-040	1p_400	1	400	15	1	0.680596
Scn1a	14	2136	1	2	TSeries-03082019-1159-040	1p_400	1	400	16	1	0.52726
Scn1a	14	2136	1	2	TSeries-03082019-1159-040	1p_400	1	400	17	0
Scn1a	14	2136	1	2	TSeries-03082019-1159-040	1p_400	1	400	18	1	0.324604
Scn1a	14	2136	1	2	TSeries-03082019-1159-040	1p_400	1	400	19	0
Scn1a	14	2136	1	2	TSeries-03082019-1159-040	1p_400	1	400	20	0
Scn1a	14	2136	1	2	TSeries-03082019-1159-041	1p_200	1	200	0	0
Scn1a	14	2136	1	2	TSeries-03082019-1159-041	1p_200	1	200	1	0
Scn1a	14	2136	1	2	TSeries-03082019-1159-041	1p_200	1	200	2	1	0.336306
Scn1a	14	2136	1	2	TSeries-03082019-1159-041	1p_200	1	200	3	0
Scn1a	14	2136	1	2	TSeries-03082019-1159-041	1p_200	1	200	4	0
Scn1a	14	2136	1	2	TSeries-03082019-1159-041	1p_200	1	200	5	0
Scn1a	14	2136	1	2	TSeries-03082019-1159-041	1p_200	1	200	6	0
Scn1a	14	2136	1	2	TSeries-03082019-1159-041	1p_200	1	200	7	1	0.570546
Scn1a	14	2136	1	2	TSeries-03082019-1159-041	1p_200	1	200	8	0
Scn1a	14	2136	1	2	TSeries-03082019-1159-041	1p_200	1	200	9	0
Scn1a	14	2136	1	2	TSeries-03082019-1159-041	1p_200	1	200	10	0
Scn1a	14	2136	1	2	TSeries-03082019-1159-041	1p_200	1	200	11	0
Scn1a	14	2136	1	2	TSeries-03082019-1159-041	1p_200	1	200	12	0
Scn1a	14	2136	1	2	TSeries-03082019-1159-041	1p_200	1	200	13	0
Scn1a	14	2136	1	2	TSeries-03082019-1159-041	1p_200	1	200	14	1	0.445366
Scn1a	14	2136	1	2	TSeries-03082019-1159-041	1p_200	1	200	15	1	0.308604
Scn1a	14	2136	1	2	TSeries-03082019-1159-041	1p_200	1	200	16	1	0.463555
Scn1a	14	2136	1	2	TSeries-03082019-1159-041	1p_200	1	200	17	1	0.445463
Scn1a	14	2136	1	2	TSeries-03082019-1159-041	1p_200	1	200	18	0
Scn1a	14	2136	1	2	TSeries-03082019-1159-041	1p_200	1	200	19	0
Scn1a	14	2136	1	2	TSeries-03082019-1159-041	1p_200	1	200	20	0
Scn1a	14	2136	1	2	TSeries-03082019-1159-042	1p_100	1	100	0	0
Scn1a	14	2136	1	2	TSeries-03082019-1159-042	1p_100	1	100	1	0
Scn1a	14	2136	1	2	TSeries-03082019-1159-042	1p_100	1	100	2	0
Scn1a	14	2136	1	2	TSeries-03082019-1159-042	1p_100	1	100	3	0
Scn1a	14	2136	1	2	TSeries-03082019-1159-042	1p_100	1	100	4	0
Scn1a	14	2136	1	2	TSeries-03082019-1159-042	1p_100	1	100	5	0
Scn1a	14	2136	1	2	TSeries-03082019-1159-042	1p_100	1	100	6	0
Scn1a	14	2136	1	2	TSeries-03082019-1159-042	1p_100	1	100	7	0
Scn1a	14	2136	1	2	TSeries-03082019-1159-042	1p_100	1	100	8	0
Scn1a	14	2136	1	2	TSeries-03082019-1159-042	1p_100	1	100	9	0
Scn1a	14	2136	1	2	TSeries-03082019-1159-042	1p_100	1	100	10	0
Scn1a	14	2136	1	2	TSeries-03082019-1159-042	1p_100	1	100	11	0
Scn1a	14	2136	1	2	TSeries-03082019-1159-042	1p_100	1	100	12	0
Scn1a	14	2136	1	2	TSeries-03082019-1159-042	1p_100	1	100	13	0
Scn1a	14	2136	1	2	TSeries-03082019-1159-042	1p_100	1	100	14	1	0.541515
Scn1a	14	2136	1	2	TSeries-03082019-1159-042	1p_100	1	100	15	1	0.217885
Scn1a	14	2136	1	2	TSeries-03082019-1159-042	1p_100	1	100	16	0
Scn1a	14	2136	1	2	TSeries-03082019-1159-042	1p_100	1	100	17	1	0.433676
Scn1a	14	2136	1	2	TSeries-03082019-1159-042	1p_100	1	100	18	0
Scn1a	14	2136	1	2	TSeries-03082019-1159-042	1p_100	1	100	19	0
Scn1a	14	2136	1	2	TSeries-03082019-1159-042	1p_100	1	100	20	0
Scn1a	14	2136	1	2	TSeries-03082019-1159-043	1p_50	1	50	0	0
Scn1a	14	2136	1	2	TSeries-03082019-1159-043	1p_50	1	50	1	0
Scn1a	14	2136	1	2	TSeries-03082019-1159-043	1p_50	1	50	2	0
Scn1a	14	2136	1	2	TSeries-03082019-1159-043	1p_50	1	50	3	0
Scn1a	14	2136	1	2	TSeries-03082019-1159-043	1p_50	1	50	4	0
Scn1a	14	2136	1	2	TSeries-03082019-1159-043	1p_50	1	50	5	0
Scn1a	14	2136	1	2	TSeries-03082019-1159-043	1p_50	1	50	6	0
Scn1a	14	2136	1	2	TSeries-03082019-1159-043	1p_50	1	50	7	0
Scn1a	14	2136	1	2	TSeries-03082019-1159-043	1p_50	1	50	8	0
Scn1a	14	2136	1	2	TSeries-03082019-1159-043	1p_50	1	50	9	0
Scn1a	14	2136	1	2	TSeries-03082019-1159-043	1p_50	1	50	10	0
Scn1a	14	2136	1	2	TSeries-03082019-1159-043	1p_50	1	50	11	0
Scn1a	14	2136	1	2	TSeries-03082019-1159-043	1p_50	1	50	12	0
Scn1a	14	2136	1	2	TSeries-03082019-1159-043	1p_50	1	50	13	0
Scn1a	14	2136	1	2	TSeries-03082019-1159-043	1p_50	1	50	14	0
Scn1a	14	2136	1	2	TSeries-03082019-1159-043	1p_50	1	50	15	0
Scn1a	14	2136	1	2	TSeries-03082019-1159-043	1p_50	1	50	16	0
Scn1a	14	2136	1	2	TSeries-03082019-1159-043	1p_50	1	50	17	0
Scn1a	14	2136	1	2	TSeries-03082019-1159-043	1p_50	1	50	18	0
Scn1a	14	2136	1	2	TSeries-03082019-1159-043	1p_50	1	50	19	0
Scn1a	14	2136	1	2	TSeries-03082019-1159-043	1p_50	1	50	20	0
Scn1a	14	2136	1	2	TSeries-03082019-1159-044	1p_25	1	25	0	0
Scn1a	14	2136	1	2	TSeries-03082019-1159-044	1p_25	1	25	1	0
Scn1a	14	2136	1	2	TSeries-03082019-1159-044	1p_25	1	25	2	0
Scn1a	14	2136	1	2	TSeries-03082019-1159-044	1p_25	1	25	3	0
Scn1a	14	2136	1	2	TSeries-03082019-1159-044	1p_25	1	25	4	0
Scn1a	14	2136	1	2	TSeries-03082019-1159-044	1p_25	1	25	5	0
Scn1a	14	2136	1	2	TSeries-03082019-1159-044	1p_25	1	25	6	0
Scn1a	14	2136	1	2	TSeries-03082019-1159-044	1p_25	1	25	7	0
Scn1a	14	2136	1	2	TSeries-03082019-1159-044	1p_25	1	25	8	0
Scn1a	14	2136	1	2	TSeries-03082019-1159-044	1p_25	1	25	9	0
Scn1a	14	2136	1	2	TSeries-03082019-1159-044	1p_25	1	25	10	0
Scn1a	14	2136	1	2	TSeries-03082019-1159-044	1p_25	1	25	11	0
Scn1a	14	2136	1	2	TSeries-03082019-1159-044	1p_25	1	25	12	0
Scn1a	14	2136	1	2	TSeries-03082019-1159-044	1p_25	1	25	13	0
Scn1a	14	2136	1	2	TSeries-03082019-1159-044	1p_25	1	25	14	0
Scn1a	14	2136	1	2	TSeries-03082019-1159-044	1p_25	1	25	15	0
Scn1a	14	2136	1	2	TSeries-03082019-1159-044	1p_25	1	25	16	0
Scn1a	14	2136	1	2	TSeries-03082019-1159-044	1p_25	1	25	17	0
Scn1a	14	2136	1	2	TSeries-03082019-1159-044	1p_25	1	25	18	0
Scn1a	14	2136	1	2	TSeries-03082019-1159-044	1p_25	1	25	19	0
Scn1a	14	2136	1	2	TSeries-03082019-1159-044	1p_25	1	25	20	0
Scn1a	14	2136	1	3	TSeries-03082019-1159-046	4p_400	4	400	0	1	1.90664
Scn1a	14	2136	1	3	TSeries-03082019-1159-046	4p_400	4	400	1	1	0.956515
Scn1a	14	2136	1	3	TSeries-03082019-1159-046	4p_400	4	400	2	1	0.989279
Scn1a	14	2136	1	3	TSeries-03082019-1159-046	4p_400	4	400	3	1	0.786492
Scn1a	14	2136	1	3	TSeries-03082019-1159-046	4p_400	4	400	4	1	0.875761
Scn1a	14	2136	1	3	TSeries-03082019-1159-046	4p_400	4	400	5	1	1.30916
Scn1a	14	2136	1	3	TSeries-03082019-1159-046	4p_400	4	400	6	1	0.97775
Scn1a	14	2136	1	3	TSeries-03082019-1159-046	4p_400	4	400	7	1	1.39176
Scn1a	14	2136	1	3	TSeries-03082019-1159-046	4p_400	4	400	8	1	1.63845
Scn1a	14	2136	1	3	TSeries-03082019-1159-046	4p_400	4	400	9	1	1.32942
Scn1a	14	2136	1	3	TSeries-03082019-1159-046	4p_400	4	400	10	1	2.0711
Scn1a	14	2136	1	3	TSeries-03082019-1159-046	4p_400	4	400	11	1	1.47291
Scn1a	14	2136	1	3	TSeries-03082019-1159-046	4p_400	4	400	12	1	0.733511
Scn1a	14	2136	1	3	TSeries-03082019-1159-046	4p_400	4	400	13	1	0.567275
Scn1a	14	2136	1	3	TSeries-03082019-1159-046	4p_400	4	400	14	1	1.54458
Scn1a	14	2136	1	3	TSeries-03082019-1159-046	4p_400	4	400	15	1	1.30126
Scn1a	14	2136	1	3	TSeries-03082019-1159-047	4p_200	4	200	0	1	1.45053
Scn1a	14	2136	1	3	TSeries-03082019-1159-047	4p_200	4	200	1	1	0.752807
Scn1a	14	2136	1	3	TSeries-03082019-1159-047	4p_200	4	200	2	1	0.472157
Scn1a	14	2136	1	3	TSeries-03082019-1159-047	4p_200	4	200	3	1	0.112184
Scn1a	14	2136	1	3	TSeries-03082019-1159-047	4p_200	4	200	4	1	0.130476
Scn1a	14	2136	1	3	TSeries-03082019-1159-047	4p_200	4	200	5	1	0.738744
Scn1a	14	2136	1	3	TSeries-03082019-1159-047	4p_200	4	200	6	1	0.759197
Scn1a	14	2136	1	3	TSeries-03082019-1159-047	4p_200	4	200	7	1	0.781529
Scn1a	14	2136	1	3	TSeries-03082019-1159-047	4p_200	4	200	8	0
Scn1a	14	2136	1	3	TSeries-03082019-1159-047	4p_200	4	200	9	1	0.462099
Scn1a	14	2136	1	3	TSeries-03082019-1159-047	4p_200	4	200	10	1	0.587383
Scn1a	14	2136	1	3	TSeries-03082019-1159-047	4p_200	4	200	11	1	0.590096
Scn1a	14	2136	1	3	TSeries-03082019-1159-047	4p_200	4	200	12	0
Scn1a	14	2136	1	3	TSeries-03082019-1159-047	4p_200	4	200	13	1	0.165603
Scn1a	14	2136	1	3	TSeries-03082019-1159-047	4p_200	4	200	14	1	0.245291
Scn1a	14	2136	1	3	TSeries-03082019-1159-047	4p_200	4	200	15	1	0.123315
Scn1a	14	2136	1	3	TSeries-03082019-1159-048	4p_100	4	100	0	1	0.485146
Scn1a	14	2136	1	3	TSeries-03082019-1159-048	4p_100	4	100	1	0
Scn1a	14	2136	1	3	TSeries-03082019-1159-048	4p_100	4	100	2	1	0.829395
Scn1a	14	2136	1	3	TSeries-03082019-1159-048	4p_100	4	100	3	0
Scn1a	14	2136	1	3	TSeries-03082019-1159-048	4p_100	4	100	4	0
Scn1a	14	2136	1	3	TSeries-03082019-1159-048	4p_100	4	100	5	1	0.451576
Scn1a	14	2136	1	3	TSeries-03082019-1159-048	4p_100	4	100	6	0
Scn1a	14	2136	1	3	TSeries-03082019-1159-048	4p_100	4	100	7	0
Scn1a	14	2136	1	3	TSeries-03082019-1159-048	4p_100	4	100	8	0
Scn1a	14	2136	1	3	TSeries-03082019-1159-048	4p_100	4	100	9	0
Scn1a	14	2136	1	3	TSeries-03082019-1159-048	4p_100	4	100	10	1	0.620223
Scn1a	14	2136	1	3	TSeries-03082019-1159-048	4p_100	4	100	11	1	0.293688
Scn1a	14	2136	1	3	TSeries-03082019-1159-048	4p_100	4	100	12	0
Scn1a	14	2136	1	3	TSeries-03082019-1159-048	4p_100	4	100	13	0
Scn1a	14	2136	1	3	TSeries-03082019-1159-048	4p_100	4	100	14	0
Scn1a	14	2136	1	3	TSeries-03082019-1159-048	4p_100	4	100	15	0
Scn1a	14	2136	1	3	TSeries-03082019-1159-049	4p_50	4	50	0	0
Scn1a	14	2136	1	3	TSeries-03082019-1159-049	4p_50	4	50	1	0
Scn1a	14	2136	1	3	TSeries-03082019-1159-049	4p_50	4	50	2	0
Scn1a	14	2136	1	3	TSeries-03082019-1159-049	4p_50	4	50	3	0
Scn1a	14	2136	1	3	TSeries-03082019-1159-049	4p_50	4	50	4	0
Scn1a	14	2136	1	3	TSeries-03082019-1159-049	4p_50	4	50	5	0
Scn1a	14	2136	1	3	TSeries-03082019-1159-049	4p_50	4	50	6	0
Scn1a	14	2136	1	3	TSeries-03082019-1159-049	4p_50	4	50	7	0
Scn1a	14	2136	1	3	TSeries-03082019-1159-049	4p_50	4	50	8	0
Scn1a	14	2136	1	3	TSeries-03082019-1159-049	4p_50	4	50	9	0
Scn1a	14	2136	1	3	TSeries-03082019-1159-049	4p_50	4	50	10	0
Scn1a	14	2136	1	3	TSeries-03082019-1159-049	4p_50	4	50	11	0
Scn1a	14	2136	1	3	TSeries-03082019-1159-049	4p_50	4	50	12	0
Scn1a	14	2136	1	3	TSeries-03082019-1159-049	4p_50	4	50	13	0
Scn1a	14	2136	1	3	TSeries-03082019-1159-049	4p_50	4	50	14	0
Scn1a	14	2136	1	3	TSeries-03082019-1159-049	4p_50	4	50	15	0
Scn1a	14	2136	1	3	TSeries-03082019-1159-050	4p_25	4	25	0	0
Scn1a	14	2136	1	3	TSeries-03082019-1159-050	4p_25	4	25	1	0
Scn1a	14	2136	1	3	TSeries-03082019-1159-050	4p_25	4	25	2	0
Scn1a	14	2136	1	3	TSeries-03082019-1159-050	4p_25	4	25	3	0
Scn1a	14	2136	1	3	TSeries-03082019-1159-050	4p_25	4	25	4	0
Scn1a	14	2136	1	3	TSeries-03082019-1159-050	4p_25	4	25	5	0
Scn1a	14	2136	1	3	TSeries-03082019-1159-050	4p_25	4	25	6	0
Scn1a	14	2136	1	3	TSeries-03082019-1159-050	4p_25	4	25	7	0
Scn1a	14	2136	1	3	TSeries-03082019-1159-050	4p_25	4	25	8	0
Scn1a	14	2136	1	3	TSeries-03082019-1159-050	4p_25	4	25	9	0
Scn1a	14	2136	1	3	TSeries-03082019-1159-050	4p_25	4	25	10	0
Scn1a	14	2136	1	3	TSeries-03082019-1159-050	4p_25	4	25	11	0
Scn1a	14	2136	1	3	TSeries-03082019-1159-050	4p_25	4	25	12	0
Scn1a	14	2136	1	3	TSeries-03082019-1159-050	4p_25	4	25	13	0
Scn1a	14	2136	1	3	TSeries-03082019-1159-050	4p_25	4	25	14	0
Scn1a	14	2136	1	3	TSeries-03082019-1159-050	4p_25	4	25	15	0
Scn1a	14	2136	1	3	TSeries-03082019-1159-051	1p_400	1	400	0	1	0.496182
Scn1a	14	2136	1	3	TSeries-03082019-1159-051	1p_400	1	400	1	1	0.260323
Scn1a	14	2136	1	3	TSeries-03082019-1159-051	1p_400	1	400	2	1	0.590513
Scn1a	14	2136	1	3	TSeries-03082019-1159-051	1p_400	1	400	3	1	0.237343
Scn1a	14	2136	1	3	TSeries-03082019-1159-051	1p_400	1	400	4	1	0.38778
Scn1a	14	2136	1	3	TSeries-03082019-1159-051	1p_400	1	400	5	1	0.412833
Scn1a	14	2136	1	3	TSeries-03082019-1159-051	1p_400	1	400	6	1	0.472098
Scn1a	14	2136	1	3	TSeries-03082019-1159-051	1p_400	1	400	7	1	0.463381
Scn1a	14	2136	1	3	TSeries-03082019-1159-051	1p_400	1	400	8	1	0.689717
Scn1a	14	2136	1	3	TSeries-03082019-1159-051	1p_400	1	400	9	1	0.689127
Scn1a	14	2136	1	3	TSeries-03082019-1159-051	1p_400	1	400	10	1	0.593038
Scn1a	14	2136	1	3	TSeries-03082019-1159-051	1p_400	1	400	11	1	0.539085
Scn1a	14	2136	1	3	TSeries-03082019-1159-051	1p_400	1	400	12	1	0.247196
Scn1a	14	2136	1	3	TSeries-03082019-1159-051	1p_400	1	400	13	1	0.241118
Scn1a	14	2136	1	3	TSeries-03082019-1159-051	1p_400	1	400	14	1	0.177633
Scn1a	14	2136	1	3	TSeries-03082019-1159-051	1p_400	1	400	15	1	0.346435
Scn1a	14	2136	1	3	TSeries-03082019-1159-052	1p_200	1	200	0	1	0.433177
Scn1a	14	2136	1	3	TSeries-03082019-1159-052	1p_200	1	200	1	0
Scn1a	14	2136	1	3	TSeries-03082019-1159-052	1p_200	1	200	2	1	0.247315
Scn1a	14	2136	1	3	TSeries-03082019-1159-052	1p_200	1	200	3	0
Scn1a	14	2136	1	3	TSeries-03082019-1159-052	1p_200	1	200	4	0
Scn1a	14	2136	1	3	TSeries-03082019-1159-052	1p_200	1	200	5	0
Scn1a	14	2136	1	3	TSeries-03082019-1159-052	1p_200	1	200	6	1	0.485668
Scn1a	14	2136	1	3	TSeries-03082019-1159-052	1p_200	1	200	7	1	0.416078
Scn1a	14	2136	1	3	TSeries-03082019-1159-052	1p_200	1	200	8	0
Scn1a	14	2136	1	3	TSeries-03082019-1159-052	1p_200	1	200	9	1	0.957437
Scn1a	14	2136	1	3	TSeries-03082019-1159-052	1p_200	1	200	10	1	0.590928
Scn1a	14	2136	1	3	TSeries-03082019-1159-052	1p_200	1	200	11	0
Scn1a	14	2136	1	3	TSeries-03082019-1159-052	1p_200	1	200	12	0
Scn1a	14	2136	1	3	TSeries-03082019-1159-052	1p_200	1	200	13	0
Scn1a	14	2136	1	3	TSeries-03082019-1159-052	1p_200	1	200	14	1	0.22927
Scn1a	14	2136	1	3	TSeries-03082019-1159-052	1p_200	1	200	15	0
Scn1a	14	2136	1	3	TSeries-03082019-1159-053	1p_100	1	100	0	1	0.374573
Scn1a	14	2136	1	3	TSeries-03082019-1159-053	1p_100	1	100	1	0
Scn1a	14	2136	1	3	TSeries-03082019-1159-053	1p_100	1	100	2	1	0.739437
Scn1a	14	2136	1	3	TSeries-03082019-1159-053	1p_100	1	100	3	0
Scn1a	14	2136	1	3	TSeries-03082019-1159-053	1p_100	1	100	4	0
Scn1a	14	2136	1	3	TSeries-03082019-1159-053	1p_100	1	100	5	1	0.230753
Scn1a	14	2136	1	3	TSeries-03082019-1159-053	1p_100	1	100	6	0
Scn1a	14	2136	1	3	TSeries-03082019-1159-053	1p_100	1	100	7	0
Scn1a	14	2136	1	3	TSeries-03082019-1159-053	1p_100	1	100	8	0
Scn1a	14	2136	1	3	TSeries-03082019-1159-053	1p_100	1	100	9	0
Scn1a	14	2136	1	3	TSeries-03082019-1159-053	1p_100	1	100	10	1	0.539656
Scn1a	14	2136	1	3	TSeries-03082019-1159-053	1p_100	1	100	11	0
Scn1a	14	2136	1	3	TSeries-03082019-1159-053	1p_100	1	100	12	0
Scn1a	14	2136	1	3	TSeries-03082019-1159-053	1p_100	1	100	13	0
Scn1a	14	2136	1	3	TSeries-03082019-1159-053	1p_100	1	100	14	1	0.0998547
Scn1a	14	2136	1	3	TSeries-03082019-1159-053	1p_100	1	100	15	0
Scn1a	14	2136	1	3	TSeries-03082019-1159-054	1p_50	1	50	0	0
Scn1a	14	2136	1	3	TSeries-03082019-1159-054	1p_50	1	50	1	0
Scn1a	14	2136	1	3	TSeries-03082019-1159-054	1p_50	1	50	2	0
Scn1a	14	2136	1	3	TSeries-03082019-1159-054	1p_50	1	50	3	0
Scn1a	14	2136	1	3	TSeries-03082019-1159-054	1p_50	1	50	4	0
Scn1a	14	2136	1	3	TSeries-03082019-1159-054	1p_50	1	50	5	0
Scn1a	14	2136	1	3	TSeries-03082019-1159-054	1p_50	1	50	6	0
Scn1a	14	2136	1	3	TSeries-03082019-1159-054	1p_50	1	50	7	0
Scn1a	14	2136	1	3	TSeries-03082019-1159-054	1p_50	1	50	8	0
Scn1a	14	2136	1	3	TSeries-03082019-1159-054	1p_50	1	50	9	0
Scn1a	14	2136	1	3	TSeries-03082019-1159-054	1p_50	1	50	10	0
Scn1a	14	2136	1	3	TSeries-03082019-1159-054	1p_50	1	50	11	0
Scn1a	14	2136	1	3	TSeries-03082019-1159-054	1p_50	1	50	12	0
Scn1a	14	2136	1	3	TSeries-03082019-1159-054	1p_50	1	50	13	0
Scn1a	14	2136	1	3	TSeries-03082019-1159-054	1p_50	1	50	14	0
Scn1a	14	2136	1	3	TSeries-03082019-1159-054	1p_50	1	50	15	0
Scn1a	14	2136	1	3	TSeries-03082019-1159-055	1p_25	1	25	0	0
Scn1a	14	2136	1	3	TSeries-03082019-1159-055	1p_25	1	25	1	0
Scn1a	14	2136	1	3	TSeries-03082019-1159-055	1p_25	1	25	2	0
Scn1a	14	2136	1	3	TSeries-03082019-1159-055	1p_25	1	25	3	0
Scn1a	14	2136	1	3	TSeries-03082019-1159-055	1p_25	1	25	4	0
Scn1a	14	2136	1	3	TSeries-03082019-1159-055	1p_25	1	25	5	0
Scn1a	14	2136	1	3	TSeries-03082019-1159-055	1p_25	1	25	6	0
Scn1a	14	2136	1	3	TSeries-03082019-1159-055	1p_25	1	25	7	0
Scn1a	14	2136	1	3	TSeries-03082019-1159-055	1p_25	1	25	8	0
Scn1a	14	2136	1	3	TSeries-03082019-1159-055	1p_25	1	25	9	0
Scn1a	14	2136	1	3	TSeries-03082019-1159-055	1p_25	1	25	10	0
Scn1a	14	2136	1	3	TSeries-03082019-1159-055	1p_25	1	25	11	0
Scn1a	14	2136	1	3	TSeries-03082019-1159-055	1p_25	1	25	12	0
Scn1a	14	2136	1	3	TSeries-03082019-1159-055	1p_25	1	25	13	0
Scn1a	14	2136	1	3	TSeries-03082019-1159-055	1p_25	1	25	14	0
Scn1a	14	2136	1	3	TSeries-03082019-1159-055	1p_25	1	25	15	0
Scn1a	14	2136	2	4	TSeries-03082019-1159-056	4p_400	4	400	0	1	0.978142
Scn1a	14	2136	2	4	TSeries-03082019-1159-056	4p_400	4	400	1	1	0.184684
Scn1a	14	2136	2	4	TSeries-03082019-1159-056	4p_400	4	400	2	1	0.930237
Scn1a	14	2136	2	4	TSeries-03082019-1159-056	4p_400	4	400	3	1	0.124452
Scn1a	14	2136	2	4	TSeries-03082019-1159-056	4p_400	4	400	4	1	1.50932
Scn1a	14	2136	2	4	TSeries-03082019-1159-056	4p_400	4	400	5	1	1.37283
Scn1a	14	2136	2	4	TSeries-03082019-1159-056	4p_400	4	400	6	1	1.35381
Scn1a	14	2136	2	4	TSeries-03082019-1159-056	4p_400	4	400	7	1	1.40526
Scn1a	14	2136	2	4	TSeries-03082019-1159-056	4p_400	4	400	8	1	1.48686
Scn1a	14	2136	2	4	TSeries-03082019-1159-056	4p_400	4	400	9	1	1.38759
Scn1a	14	2136	2	4	TSeries-03082019-1159-056	4p_400	4	400	10	1	0.70449
Scn1a	14	2136	2	4	TSeries-03082019-1159-056	4p_400	4	400	11	1	1.29962
Scn1a	14	2136	2	4	TSeries-03082019-1159-056	4p_400	4	400	12	1	1.48544
Scn1a	14	2136	2	4	TSeries-03082019-1159-056	4p_400	4	400	13	1	0.334564
Scn1a	14	2136	2	4	TSeries-03082019-1159-056	4p_400	4	400	14	1	1.09808
Scn1a	14	2136	2	4	TSeries-03082019-1159-056	4p_400	4	400	15	1	1.00062
Scn1a	14	2136	2	4	TSeries-03082019-1159-056	4p_400	4	400	16	1	1.1064
Scn1a	14	2136	2	4	TSeries-03082019-1159-056	4p_400	4	400	17	1	1.47594
Scn1a	14	2136	2	4	TSeries-03082019-1159-056	4p_400	4	400	18	1	0.732398
Scn1a	14	2136	2	4	TSeries-03082019-1159-056	4p_400	4	400	19	1	0.346169
Scn1a	14	2136	2	4	TSeries-03082019-1159-056	4p_400	4	400	20	1	0.929941
Scn1a	14	2136	2	4	TSeries-03082019-1159-057	4p_200	4	200	0	1	0.157547
Scn1a	14	2136	2	4	TSeries-03082019-1159-057	4p_200	4	200	1	0
Scn1a	14	2136	2	4	TSeries-03082019-1159-057	4p_200	4	200	2	1	0.57283
Scn1a	14	2136	2	4	TSeries-03082019-1159-057	4p_200	4	200	3	0
Scn1a	14	2136	2	4	TSeries-03082019-1159-057	4p_200	4	200	4	1	0.174947
Scn1a	14	2136	2	4	TSeries-03082019-1159-057	4p_200	4	200	5	1	0.897841
Scn1a	14	2136	2	4	TSeries-03082019-1159-057	4p_200	4	200	6	1	1.33191
Scn1a	14	2136	2	4	TSeries-03082019-1159-057	4p_200	4	200	7	1	1.40194
Scn1a	14	2136	2	4	TSeries-03082019-1159-057	4p_200	4	200	8	1	0.165492
Scn1a	14	2136	2	4	TSeries-03082019-1159-057	4p_200	4	200	9	1	0.831808
Scn1a	14	2136	2	4	TSeries-03082019-1159-057	4p_200	4	200	10	1	0.623248
Scn1a	14	2136	2	4	TSeries-03082019-1159-057	4p_200	4	200	11	1	0.175352
Scn1a	14	2136	2	4	TSeries-03082019-1159-057	4p_200	4	200	12	1	0.554651
Scn1a	14	2136	2	4	TSeries-03082019-1159-057	4p_200	4	200	13	1	0.188992
Scn1a	14	2136	2	4	TSeries-03082019-1159-057	4p_200	4	200	14	1	0.452151
Scn1a	14	2136	2	4	TSeries-03082019-1159-057	4p_200	4	200	15	1	0.801788
Scn1a	14	2136	2	4	TSeries-03082019-1159-057	4p_200	4	200	16	1	0.223261
Scn1a	14	2136	2	4	TSeries-03082019-1159-057	4p_200	4	200	17	1	0.722787
Scn1a	14	2136	2	4	TSeries-03082019-1159-057	4p_200	4	200	18	0
Scn1a	14	2136	2	4	TSeries-03082019-1159-057	4p_200	4	200	19	1	0.200052
Scn1a	14	2136	2	4	TSeries-03082019-1159-057	4p_200	4	200	20	1	0.291831
Scn1a	14	2136	2	4	TSeries-03082019-1159-058	4p_100	4	100	0	0
Scn1a	14	2136	2	4	TSeries-03082019-1159-058	4p_100	4	100	1	0
Scn1a	14	2136	2	4	TSeries-03082019-1159-058	4p_100	4	100	2	0
Scn1a	14	2136	2	4	TSeries-03082019-1159-058	4p_100	4	100	3	1	0.765531
Scn1a	14	2136	2	4	TSeries-03082019-1159-058	4p_100	4	100	4	0
Scn1a	14	2136	2	4	TSeries-03082019-1159-058	4p_100	4	100	5	1	0.377977
Scn1a	14	2136	2	4	TSeries-03082019-1159-058	4p_100	4	100	6	1	0.714231
Scn1a	14	2136	2	4	TSeries-03082019-1159-058	4p_100	4	100	7	1	0.475511
Scn1a	14	2136	2	4	TSeries-03082019-1159-058	4p_100	4	100	8	1	0.0899567
Scn1a	14	2136	2	4	TSeries-03082019-1159-058	4p_100	4	100	9	1	0.689171
Scn1a	14	2136	2	4	TSeries-03082019-1159-058	4p_100	4	100	10	1	0.124475
Scn1a	14	2136	2	4	TSeries-03082019-1159-058	4p_100	4	100	11	0
Scn1a	14	2136	2	4	TSeries-03082019-1159-058	4p_100	4	100	12	0
Scn1a	14	2136	2	4	TSeries-03082019-1159-058	4p_100	4	100	13	0
Scn1a	14	2136	2	4	TSeries-03082019-1159-058	4p_100	4	100	14	0
Scn1a	14	2136	2	4	TSeries-03082019-1159-058	4p_100	4	100	15	1	0.412205
Scn1a	14	2136	2	4	TSeries-03082019-1159-058	4p_100	4	100	16	0
Scn1a	14	2136	2	4	TSeries-03082019-1159-058	4p_100	4	100	17	1	0.212734
Scn1a	14	2136	2	4	TSeries-03082019-1159-058	4p_100	4	100	18	0
Scn1a	14	2136	2	4	TSeries-03082019-1159-058	4p_100	4	100	19	0
Scn1a	14	2136	2	4	TSeries-03082019-1159-058	4p_100	4	100	20	0
Scn1a	14	2136	2	4	TSeries-03082019-1159-059	4p_50	4	50	0	0
Scn1a	14	2136	2	4	TSeries-03082019-1159-059	4p_50	4	50	1	0
Scn1a	14	2136	2	4	TSeries-03082019-1159-059	4p_50	4	50	2	0
Scn1a	14	2136	2	4	TSeries-03082019-1159-059	4p_50	4	50	3	0
Scn1a	14	2136	2	4	TSeries-03082019-1159-059	4p_50	4	50	4	0
Scn1a	14	2136	2	4	TSeries-03082019-1159-059	4p_50	4	50	5	0
Scn1a	14	2136	2	4	TSeries-03082019-1159-059	4p_50	4	50	6	0
Scn1a	14	2136	2	4	TSeries-03082019-1159-059	4p_50	4	50	7	0
Scn1a	14	2136	2	4	TSeries-03082019-1159-059	4p_50	4	50	8	0
Scn1a	14	2136	2	4	TSeries-03082019-1159-059	4p_50	4	50	9	0
Scn1a	14	2136	2	4	TSeries-03082019-1159-059	4p_50	4	50	10	0
Scn1a	14	2136	2	4	TSeries-03082019-1159-059	4p_50	4	50	11	0
Scn1a	14	2136	2	4	TSeries-03082019-1159-059	4p_50	4	50	12	0
Scn1a	14	2136	2	4	TSeries-03082019-1159-059	4p_50	4	50	13	0
Scn1a	14	2136	2	4	TSeries-03082019-1159-059	4p_50	4	50	14	0
Scn1a	14	2136	2	4	TSeries-03082019-1159-059	4p_50	4	50	15	0
Scn1a	14	2136	2	4	TSeries-03082019-1159-059	4p_50	4	50	16	0
Scn1a	14	2136	2	4	TSeries-03082019-1159-059	4p_50	4	50	17	0
Scn1a	14	2136	2	4	TSeries-03082019-1159-059	4p_50	4	50	18	0
Scn1a	14	2136	2	4	TSeries-03082019-1159-059	4p_50	4	50	19	0
Scn1a	14	2136	2	4	TSeries-03082019-1159-059	4p_50	4	50	20	0
Scn1a	14	2136	2	4	TSeries-03082019-1159-060	4p_25	4	25	0	0
Scn1a	14	2136	2	4	TSeries-03082019-1159-060	4p_25	4	25	1	0
Scn1a	14	2136	2	4	TSeries-03082019-1159-060	4p_25	4	25	2	0
Scn1a	14	2136	2	4	TSeries-03082019-1159-060	4p_25	4	25	3	0
Scn1a	14	2136	2	4	TSeries-03082019-1159-060	4p_25	4	25	4	0
Scn1a	14	2136	2	4	TSeries-03082019-1159-060	4p_25	4	25	5	0
Scn1a	14	2136	2	4	TSeries-03082019-1159-060	4p_25	4	25	6	0
Scn1a	14	2136	2	4	TSeries-03082019-1159-060	4p_25	4	25	7	0
Scn1a	14	2136	2	4	TSeries-03082019-1159-060	4p_25	4	25	8	0
Scn1a	14	2136	2	4	TSeries-03082019-1159-060	4p_25	4	25	9	0
Scn1a	14	2136	2	4	TSeries-03082019-1159-060	4p_25	4	25	10	0
Scn1a	14	2136	2	4	TSeries-03082019-1159-060	4p_25	4	25	11	0
Scn1a	14	2136	2	4	TSeries-03082019-1159-060	4p_25	4	25	12	0
Scn1a	14	2136	2	4	TSeries-03082019-1159-060	4p_25	4	25	13	0
Scn1a	14	2136	2	4	TSeries-03082019-1159-060	4p_25	4	25	14	0
Scn1a	14	2136	2	4	TSeries-03082019-1159-060	4p_25	4	25	15	0
Scn1a	14	2136	2	4	TSeries-03082019-1159-060	4p_25	4	25	16	0
Scn1a	14	2136	2	4	TSeries-03082019-1159-060	4p_25	4	25	17	0
Scn1a	14	2136	2	4	TSeries-03082019-1159-060	4p_25	4	25	18	0
Scn1a	14	2136	2	4	TSeries-03082019-1159-060	4p_25	4	25	19	0
Scn1a	14	2136	2	4	TSeries-03082019-1159-060	4p_25	4	25	20	0
Scn1a	14	2136	2	4	TSeries-03082019-1159-061	1p_400	1	400	0	1	0.327221
Scn1a	14	2136	2	4	TSeries-03082019-1159-061	1p_400	1	400	1	0
Scn1a	14	2136	2	4	TSeries-03082019-1159-061	1p_400	1	400	2	1	0.409151
Scn1a	14	2136	2	4	TSeries-03082019-1159-061	1p_400	1	400	3	1	0.522202
Scn1a	14	2136	2	4	TSeries-03082019-1159-061	1p_400	1	400	4	0
Scn1a	14	2136	2	4	TSeries-03082019-1159-061	1p_400	1	400	5	1	0.44401
Scn1a	14	2136	2	4	TSeries-03082019-1159-061	1p_400	1	400	6	1	0.319727
Scn1a	14	2136	2	4	TSeries-03082019-1159-061	1p_400	1	400	7	1	0.417426
Scn1a	14	2136	2	4	TSeries-03082019-1159-061	1p_400	1	400	8	1	0.532523
Scn1a	14	2136	2	4	TSeries-03082019-1159-061	1p_400	1	400	9	1	0.540428
Scn1a	14	2136	2	4	TSeries-03082019-1159-061	1p_400	1	400	10	1	0.384988
Scn1a	14	2136	2	4	TSeries-03082019-1159-061	1p_400	1	400	11	1	0.498875
Scn1a	14	2136	2	4	TSeries-03082019-1159-061	1p_400	1	400	12	1	0.512562
Scn1a	14	2136	2	4	TSeries-03082019-1159-061	1p_400	1	400	13	0
Scn1a	14	2136	2	4	TSeries-03082019-1159-061	1p_400	1	400	14	1	0.34482
Scn1a	14	2136	2	4	TSeries-03082019-1159-061	1p_400	1	400	15	1	0.228679
Scn1a	14	2136	2	4	TSeries-03082019-1159-061	1p_400	1	400	16	1	0.348467
Scn1a	14	2136	2	4	TSeries-03082019-1159-061	1p_400	1	400	17	1	0.244368
Scn1a	14	2136	2	4	TSeries-03082019-1159-061	1p_400	1	400	18	1	0.360775
Scn1a	14	2136	2	4	TSeries-03082019-1159-061	1p_400	1	400	19	1	0.161293
Scn1a	14	2136	2	4	TSeries-03082019-1159-061	1p_400	1	400	20	1	0.42247
Scn1a	14	2136	2	4	TSeries-03082019-1159-062	1p_200	1	200	0	0
Scn1a	14	2136	2	4	TSeries-03082019-1159-062	1p_200	1	200	1	0
Scn1a	14	2136	2	4	TSeries-03082019-1159-062	1p_200	1	200	2	0
Scn1a	14	2136	2	4	TSeries-03082019-1159-062	1p_200	1	200	3	0
Scn1a	14	2136	2	4	TSeries-03082019-1159-062	1p_200	1	200	4	0
Scn1a	14	2136	2	4	TSeries-03082019-1159-062	1p_200	1	200	5	1	0.386019
Scn1a	14	2136	2	4	TSeries-03082019-1159-062	1p_200	1	200	6	1	0.411836
Scn1a	14	2136	2	4	TSeries-03082019-1159-062	1p_200	1	200	7	1	0.459686
Scn1a	14	2136	2	4	TSeries-03082019-1159-062	1p_200	1	200	8	1	0.690872
Scn1a	14	2136	2	4	TSeries-03082019-1159-062	1p_200	1	200	9	1	0.235496
Scn1a	14	2136	2	4	TSeries-03082019-1159-062	1p_200	1	200	10	0
Scn1a	14	2136	2	4	TSeries-03082019-1159-062	1p_200	1	200	11	0
Scn1a	14	2136	2	4	TSeries-03082019-1159-062	1p_200	1	200	12	0
Scn1a	14	2136	2	4	TSeries-03082019-1159-062	1p_200	1	200	13	0
Scn1a	14	2136	2	4	TSeries-03082019-1159-062	1p_200	1	200	14	0
Scn1a	14	2136	2	4	TSeries-03082019-1159-062	1p_200	1	200	15	1	0.360669
Scn1a	14	2136	2	4	TSeries-03082019-1159-062	1p_200	1	200	16	0
Scn1a	14	2136	2	4	TSeries-03082019-1159-062	1p_200	1	200	17	0
Scn1a	14	2136	2	4	TSeries-03082019-1159-062	1p_200	1	200	18	1	0.61199
Scn1a	14	2136	2	4	TSeries-03082019-1159-062	1p_200	1	200	19	0
Scn1a	14	2136	2	4	TSeries-03082019-1159-062	1p_200	1	200	20	0
Scn1a	14	2136	2	4	TSeries-03082019-1159-063	1p_100	1	100	0	0
Scn1a	14	2136	2	4	TSeries-03082019-1159-063	1p_100	1	100	1	0
Scn1a	14	2136	2	4	TSeries-03082019-1159-063	1p_100	1	100	2	0
Scn1a	14	2136	2	4	TSeries-03082019-1159-063	1p_100	1	100	3	0
Scn1a	14	2136	2	4	TSeries-03082019-1159-063	1p_100	1	100	4	0
Scn1a	14	2136	2	4	TSeries-03082019-1159-063	1p_100	1	100	5	1	0.33004
Scn1a	14	2136	2	4	TSeries-03082019-1159-063	1p_100	1	100	6	0
Scn1a	14	2136	2	4	TSeries-03082019-1159-063	1p_100	1	100	7	0
Scn1a	14	2136	2	4	TSeries-03082019-1159-063	1p_100	1	100	8	0
Scn1a	14	2136	2	4	TSeries-03082019-1159-063	1p_100	1	100	9	0
Scn1a	14	2136	2	4	TSeries-03082019-1159-063	1p_100	1	100	10	0
Scn1a	14	2136	2	4	TSeries-03082019-1159-063	1p_100	1	100	11	0
Scn1a	14	2136	2	4	TSeries-03082019-1159-063	1p_100	1	100	12	0
Scn1a	14	2136	2	4	TSeries-03082019-1159-063	1p_100	1	100	13	0
Scn1a	14	2136	2	4	TSeries-03082019-1159-063	1p_100	1	100	14	0
Scn1a	14	2136	2	4	TSeries-03082019-1159-063	1p_100	1	100	15	0
Scn1a	14	2136	2	4	TSeries-03082019-1159-063	1p_100	1	100	16	0
Scn1a	14	2136	2	4	TSeries-03082019-1159-063	1p_100	1	100	17	1	0.242306
Scn1a	14	2136	2	4	TSeries-03082019-1159-063	1p_100	1	100	18	0
Scn1a	14	2136	2	4	TSeries-03082019-1159-063	1p_100	1	100	19	0
Scn1a	14	2136	2	4	TSeries-03082019-1159-063	1p_100	1	100	20	0
Scn1a	14	2136	2	4	TSeries-03082019-1159-064	1p_50	1	50	0	0
Scn1a	14	2136	2	4	TSeries-03082019-1159-064	1p_50	1	50	1	0
Scn1a	14	2136	2	4	TSeries-03082019-1159-064	1p_50	1	50	2	0
Scn1a	14	2136	2	4	TSeries-03082019-1159-064	1p_50	1	50	3	0
Scn1a	14	2136	2	4	TSeries-03082019-1159-064	1p_50	1	50	4	0
Scn1a	14	2136	2	4	TSeries-03082019-1159-064	1p_50	1	50	5	0
Scn1a	14	2136	2	4	TSeries-03082019-1159-064	1p_50	1	50	6	0
Scn1a	14	2136	2	4	TSeries-03082019-1159-064	1p_50	1	50	7	0
Scn1a	14	2136	2	4	TSeries-03082019-1159-064	1p_50	1	50	8	0
Scn1a	14	2136	2	4	TSeries-03082019-1159-064	1p_50	1	50	9	0
Scn1a	14	2136	2	4	TSeries-03082019-1159-064	1p_50	1	50	10	0
Scn1a	14	2136	2	4	TSeries-03082019-1159-064	1p_50	1	50	11	0
Scn1a	14	2136	2	4	TSeries-03082019-1159-064	1p_50	1	50	12	0
Scn1a	14	2136	2	4	TSeries-03082019-1159-064	1p_50	1	50	13	0
Scn1a	14	2136	2	4	TSeries-03082019-1159-064	1p_50	1	50	14	0
Scn1a	14	2136	2	4	TSeries-03082019-1159-064	1p_50	1	50	15	0
Scn1a	14	2136	2	4	TSeries-03082019-1159-064	1p_50	1	50	16	0
Scn1a	14	2136	2	4	TSeries-03082019-1159-064	1p_50	1	50	17	0
Scn1a	14	2136	2	4	TSeries-03082019-1159-064	1p_50	1	50	18	0
Scn1a	14	2136	2	4	TSeries-03082019-1159-064	1p_50	1	50	19	0
Scn1a	14	2136	2	4	TSeries-03082019-1159-064	1p_50	1	50	20	0
Scn1a	14	2136	2	4	TSeries-03082019-1159-065	1p_25	1	25	0	0
Scn1a	14	2136	2	4	TSeries-03082019-1159-065	1p_25	1	25	1	0
Scn1a	14	2136	2	4	TSeries-03082019-1159-065	1p_25	1	25	2	0
Scn1a	14	2136	2	4	TSeries-03082019-1159-065	1p_25	1	25	3	0
Scn1a	14	2136	2	4	TSeries-03082019-1159-065	1p_25	1	25	4	0
Scn1a	14	2136	2	4	TSeries-03082019-1159-065	1p_25	1	25	5	0
Scn1a	14	2136	2	4	TSeries-03082019-1159-065	1p_25	1	25	6	0
Scn1a	14	2136	2	4	TSeries-03082019-1159-065	1p_25	1	25	7	0
Scn1a	14	2136	2	4	TSeries-03082019-1159-065	1p_25	1	25	8	0
Scn1a	14	2136	2	4	TSeries-03082019-1159-065	1p_25	1	25	9	0
Scn1a	14	2136	2	4	TSeries-03082019-1159-065	1p_25	1	25	10	0
Scn1a	14	2136	2	4	TSeries-03082019-1159-065	1p_25	1	25	11	0
Scn1a	14	2136	2	4	TSeries-03082019-1159-065	1p_25	1	25	12	0
Scn1a	14	2136	2	4	TSeries-03082019-1159-065	1p_25	1	25	13	0
Scn1a	14	2136	2	4	TSeries-03082019-1159-065	1p_25	1	25	14	0
Scn1a	14	2136	2	4	TSeries-03082019-1159-065	1p_25	1	25	15	0
Scn1a	14	2136	2	4	TSeries-03082019-1159-065	1p_25	1	25	16	0
Scn1a	14	2136	2	4	TSeries-03082019-1159-065	1p_25	1	25	17	0
Scn1a	14	2136	2	4	TSeries-03082019-1159-065	1p_25	1	25	18	0
Scn1a	14	2136	2	4	TSeries-03082019-1159-065	1p_25	1	25	19	0
Scn1a	14	2136	2	4	TSeries-03082019-1159-065	1p_25	1	25	20	0
Scn1a	14	2136	2	6	TSeries-03082019-1159-076	4p_400	4	400	0	1	0.83599
Scn1a	14	2136	2	6	TSeries-03082019-1159-076	4p_400	4	400	1	0
Scn1a	14	2136	2	6	TSeries-03082019-1159-076	4p_400	4	400	2	0
Scn1a	14	2136	2	6	TSeries-03082019-1159-076	4p_400	4	400	3	1	0.268338
Scn1a	14	2136	2	6	TSeries-03082019-1159-076	4p_400	4	400	4	1	0.404593
Scn1a	14	2136	2	6	TSeries-03082019-1159-076	4p_400	4	400	5	1	1.18434
Scn1a	14	2136	2	6	TSeries-03082019-1159-076	4p_400	4	400	6	0
Scn1a	14	2136	2	6	TSeries-03082019-1159-076	4p_400	4	400	7	1	0.169255
Scn1a	14	2136	2	6	TSeries-03082019-1159-076	4p_400	4	400	8	0
Scn1a	14	2136	2	6	TSeries-03082019-1159-077	4p_200	4	200	0	1	0.949617
Scn1a	14	2136	2	6	TSeries-03082019-1159-077	4p_200	4	200	1	1	1.27451
Scn1a	14	2136	2	6	TSeries-03082019-1159-077	4p_200	4	200	2	0
Scn1a	14	2136	2	6	TSeries-03082019-1159-077	4p_200	4	200	3	0
Scn1a	14	2136	2	6	TSeries-03082019-1159-077	4p_200	4	200	4	0
Scn1a	14	2136	2	6	TSeries-03082019-1159-077	4p_200	4	200	5	1	1.00068
Scn1a	14	2136	2	6	TSeries-03082019-1159-077	4p_200	4	200	6	0
Scn1a	14	2136	2	6	TSeries-03082019-1159-077	4p_200	4	200	7	0
Scn1a	14	2136	2	6	TSeries-03082019-1159-077	4p_200	4	200	8	0
Scn1a	14	2136	2	6	TSeries-03082019-1159-078	4p_100	4	100	0	1	0.0822411
Scn1a	14	2136	2	6	TSeries-03082019-1159-078	4p_100	4	100	1	1	1.52963
Scn1a	14	2136	2	6	TSeries-03082019-1159-078	4p_100	4	100	2	1	0.118095
Scn1a	14	2136	2	6	TSeries-03082019-1159-078	4p_100	4	100	3	0
Scn1a	14	2136	2	6	TSeries-03082019-1159-078	4p_100	4	100	4	0
Scn1a	14	2136	2	6	TSeries-03082019-1159-078	4p_100	4	100	5	1	0.59663
Scn1a	14	2136	2	6	TSeries-03082019-1159-078	4p_100	4	100	6	0
Scn1a	14	2136	2	6	TSeries-03082019-1159-078	4p_100	4	100	7	0
Scn1a	14	2136	2	6	TSeries-03082019-1159-078	4p_100	4	100	8	1	0.130655
Scn1a	14	2136	2	6	TSeries-03082019-1159-079	4p_50	4	50	0	0
Scn1a	14	2136	2	6	TSeries-03082019-1159-079	4p_50	4	50	1	1	0.196883
Scn1a	14	2136	2	6	TSeries-03082019-1159-079	4p_50	4	50	2	0
Scn1a	14	2136	2	6	TSeries-03082019-1159-079	4p_50	4	50	3	0
Scn1a	14	2136	2	6	TSeries-03082019-1159-079	4p_50	4	50	4	0
Scn1a	14	2136	2	6	TSeries-03082019-1159-079	4p_50	4	50	5	0
Scn1a	14	2136	2	6	TSeries-03082019-1159-079	4p_50	4	50	6	0
Scn1a	14	2136	2	6	TSeries-03082019-1159-079	4p_50	4	50	7	0
Scn1a	14	2136	2	6	TSeries-03082019-1159-079	4p_50	4	50	8	0
Scn1a	14	2136	2	6	TSeries-03082019-1159-080	4p_25	4	25	0	0
Scn1a	14	2136	2	6	TSeries-03082019-1159-080	4p_25	4	25	1	0
Scn1a	14	2136	2	6	TSeries-03082019-1159-080	4p_25	4	25	2	0
Scn1a	14	2136	2	6	TSeries-03082019-1159-080	4p_25	4	25	3	0
Scn1a	14	2136	2	6	TSeries-03082019-1159-080	4p_25	4	25	4	0
Scn1a	14	2136	2	6	TSeries-03082019-1159-080	4p_25	4	25	5	0
Scn1a	14	2136	2	6	TSeries-03082019-1159-080	4p_25	4	25	6	1	0.12311
Scn1a	14	2136	2	6	TSeries-03082019-1159-080	4p_25	4	25	7	0
Scn1a	14	2136	2	6	TSeries-03082019-1159-080	4p_25	4	25	8	0
Scn1a	14	2136	2	6	TSeries-03082019-1159-081	1p_400	1	400	0	1	0.351046
Scn1a	14	2136	2	6	TSeries-03082019-1159-081	1p_400	1	400	1	0
Scn1a	14	2136	2	6	TSeries-03082019-1159-081	1p_400	1	400	2	0
Scn1a	14	2136	2	6	TSeries-03082019-1159-081	1p_400	1	400	3	0
Scn1a	14	2136	2	6	TSeries-03082019-1159-081	1p_400	1	400	4	1	0.274702
Scn1a	14	2136	2	6	TSeries-03082019-1159-081	1p_400	1	400	5	1	0.439675
Scn1a	14	2136	2	6	TSeries-03082019-1159-081	1p_400	1	400	6	0
Scn1a	14	2136	2	6	TSeries-03082019-1159-081	1p_400	1	400	7	0
Scn1a	14	2136	2	6	TSeries-03082019-1159-081	1p_400	1	400	8	0
Scn1a	14	2136	2	6	TSeries-03082019-1159-082	1p_200	1	200	0	0
Scn1a	14	2136	2	6	TSeries-03082019-1159-082	1p_200	1	200	1	0
Scn1a	14	2136	2	6	TSeries-03082019-1159-082	1p_200	1	200	2	0
Scn1a	14	2136	2	6	TSeries-03082019-1159-082	1p_200	1	200	3	0
Scn1a	14	2136	2	6	TSeries-03082019-1159-082	1p_200	1	200	4	0
Scn1a	14	2136	2	6	TSeries-03082019-1159-082	1p_200	1	200	5	1	0.362813
Scn1a	14	2136	2	6	TSeries-03082019-1159-082	1p_200	1	200	6	0
Scn1a	14	2136	2	6	TSeries-03082019-1159-082	1p_200	1	200	7	0
Scn1a	14	2136	2	6	TSeries-03082019-1159-082	1p_200	1	200	8	0
Scn1a	14	2136	2	6	TSeries-03082019-1159-083	1p_100	1	100	0	0
Scn1a	14	2136	2	6	TSeries-03082019-1159-083	1p_100	1	100	1	0
Scn1a	14	2136	2	6	TSeries-03082019-1159-083	1p_100	1	100	2	0
Scn1a	14	2136	2	6	TSeries-03082019-1159-083	1p_100	1	100	3	0
Scn1a	14	2136	2	6	TSeries-03082019-1159-083	1p_100	1	100	4	0
Scn1a	14	2136	2	6	TSeries-03082019-1159-083	1p_100	1	100	5	1	0.377131
Scn1a	14	2136	2	6	TSeries-03082019-1159-083	1p_100	1	100	6	0
Scn1a	14	2136	2	6	TSeries-03082019-1159-083	1p_100	1	100	7	0
Scn1a	14	2136	2	6	TSeries-03082019-1159-083	1p_100	1	100	8	0
Scn1a	14	2136	2	6	TSeries-03082019-1159-084	1p_50	1	50	0	0
Scn1a	14	2136	2	6	TSeries-03082019-1159-084	1p_50	1	50	1	0
Scn1a	14	2136	2	6	TSeries-03082019-1159-084	1p_50	1	50	2	0
Scn1a	14	2136	2	6	TSeries-03082019-1159-084	1p_50	1	50	3	0
Scn1a	14	2136	2	6	TSeries-03082019-1159-084	1p_50	1	50	4	0
Scn1a	14	2136	2	6	TSeries-03082019-1159-084	1p_50	1	50	5	0
Scn1a	14	2136	2	6	TSeries-03082019-1159-084	1p_50	1	50	6	0
Scn1a	14	2136	2	6	TSeries-03082019-1159-084	1p_50	1	50	7	0
Scn1a	14	2136	2	6	TSeries-03082019-1159-084	1p_50	1	50	8	0
Scn1a	14	2136	2	6	TSeries-03082019-1159-085	1p_25	1	25	0	1	0.935454
Scn1a	14	2136	2	6	TSeries-03082019-1159-085	1p_25	1	25	1	1	0.799228
Scn1a	14	2136	2	6	TSeries-03082019-1159-085	1p_25	1	25	2	0
Scn1a	14	2136	2	6	TSeries-03082019-1159-085	1p_25	1	25	3	1	0.346069
Scn1a	14	2136	2	6	TSeries-03082019-1159-085	1p_25	1	25	4	0
Scn1a	14	2136	2	6	TSeries-03082019-1159-085	1p_25	1	25	5	1	1.17101
Scn1a	14	2136	2	6	TSeries-03082019-1159-085	1p_25	1	25	6	0
Scn1a	14	2136	2	6	TSeries-03082019-1159-085	1p_25	1	25	7	1	0.0898269
Scn1a	14	2136	2	6	TSeries-03082019-1159-085	1p_25	1	25	8	0
WT	15	2137	1	1	TSeries-03092019-0946-001	4p_400	4	400	0	1	0.825729
WT	15	2137	1	1	TSeries-03092019-0946-001	4p_400	4	400	1	1	0.460761
WT	15	2137	1	1	TSeries-03092019-0946-001	4p_400	4	400	2	1	0.513177
WT	15	2137	1	1	TSeries-03092019-0946-001	4p_400	4	400	3	1	0.259351
WT	15	2137	1	1	TSeries-03092019-0946-001	4p_400	4	400	4	1	1.64609
WT	15	2137	1	1	TSeries-03092019-0946-001	4p_400	4	400	5	1	0.316388
WT	15	2137	1	1	TSeries-03092019-0946-001	4p_400	4	400	6	1	0.187919
WT	15	2137	1	1	TSeries-03092019-0946-001	4p_400	4	400	7	0
WT	15	2137	1	1	TSeries-03092019-0946-001	4p_400	4	400	8	1	1.55591
WT	15	2137	1	1	TSeries-03092019-0946-001	4p_400	4	400	9	0
WT	15	2137	1	1	TSeries-03092019-0946-001	4p_400	4	400	10	1	2.43943
WT	15	2137	1	1	TSeries-03092019-0946-001	4p_400	4	400	11	1	1.01079
WT	15	2137	1	1	TSeries-03092019-0946-001	4p_400	4	400	12	1	1.94055
WT	15	2137	1	1	TSeries-03092019-0946-001	4p_400	4	400	13	1	0.547472
WT	15	2137	1	1	TSeries-03092019-0946-001	4p_400	4	400	14	1	0.291725
WT	15	2137	1	1	TSeries-03092019-0946-002	4p_200	4	200	0	0
WT	15	2137	1	1	TSeries-03092019-0946-002	4p_200	4	200	1	0
WT	15	2137	1	1	TSeries-03092019-0946-002	4p_200	4	200	2	1	0.22784
WT	15	2137	1	1	TSeries-03092019-0946-002	4p_200	4	200	3	0
WT	15	2137	1	1	TSeries-03092019-0946-002	4p_200	4	200	4	1	0.29954
WT	15	2137	1	1	TSeries-03092019-0946-002	4p_200	4	200	5	1	0.10997
WT	15	2137	1	1	TSeries-03092019-0946-002	4p_200	4	200	6	0
WT	15	2137	1	1	TSeries-03092019-0946-002	4p_200	4	200	7	0
WT	15	2137	1	1	TSeries-03092019-0946-002	4p_200	4	200	8	1	0.360582
WT	15	2137	1	1	TSeries-03092019-0946-002	4p_200	4	200	9	0
WT	15	2137	1	1	TSeries-03092019-0946-002	4p_200	4	200	10	1	0.2395
WT	15	2137	1	1	TSeries-03092019-0946-002	4p_200	4	200	11	0
WT	15	2137	1	1	TSeries-03092019-0946-002	4p_200	4	200	12	1	0.100187
WT	15	2137	1	1	TSeries-03092019-0946-002	4p_200	4	200	13	0
WT	15	2137	1	1	TSeries-03092019-0946-002	4p_200	4	200	14	0
WT	15	2137	1	1	TSeries-03092019-0946-003	4p_100	4	100	0	0
WT	15	2137	1	1	TSeries-03092019-0946-003	4p_100	4	100	1	0
WT	15	2137	1	1	TSeries-03092019-0946-003	4p_100	4	100	2	0
WT	15	2137	1	1	TSeries-03092019-0946-003	4p_100	4	100	3	0
WT	15	2137	1	1	TSeries-03092019-0946-003	4p_100	4	100	4	0
WT	15	2137	1	1	TSeries-03092019-0946-003	4p_100	4	100	5	0
WT	15	2137	1	1	TSeries-03092019-0946-003	4p_100	4	100	6	0
WT	15	2137	1	1	TSeries-03092019-0946-003	4p_100	4	100	7	0
WT	15	2137	1	1	TSeries-03092019-0946-003	4p_100	4	100	8	0
WT	15	2137	1	1	TSeries-03092019-0946-003	4p_100	4	100	9	0
WT	15	2137	1	1	TSeries-03092019-0946-003	4p_100	4	100	10	0
WT	15	2137	1	1	TSeries-03092019-0946-003	4p_100	4	100	11	0
WT	15	2137	1	1	TSeries-03092019-0946-003	4p_100	4	100	12	0
WT	15	2137	1	1	TSeries-03092019-0946-003	4p_100	4	100	13	0
WT	15	2137	1	1	TSeries-03092019-0946-003	4p_100	4	100	14	0
WT	15	2137	1	1	TSeries-03092019-0946-004	4p_50	4	50	0	0
WT	15	2137	1	1	TSeries-03092019-0946-004	4p_50	4	50	1	0
WT	15	2137	1	1	TSeries-03092019-0946-004	4p_50	4	50	2	0
WT	15	2137	1	1	TSeries-03092019-0946-004	4p_50	4	50	3	0
WT	15	2137	1	1	TSeries-03092019-0946-004	4p_50	4	50	4	0
WT	15	2137	1	1	TSeries-03092019-0946-004	4p_50	4	50	5	0
WT	15	2137	1	1	TSeries-03092019-0946-004	4p_50	4	50	6	0
WT	15	2137	1	1	TSeries-03092019-0946-004	4p_50	4	50	7	0
WT	15	2137	1	1	TSeries-03092019-0946-004	4p_50	4	50	8	0
WT	15	2137	1	1	TSeries-03092019-0946-004	4p_50	4	50	9	0
WT	15	2137	1	1	TSeries-03092019-0946-004	4p_50	4	50	10	0
WT	15	2137	1	1	TSeries-03092019-0946-004	4p_50	4	50	11	0
WT	15	2137	1	1	TSeries-03092019-0946-004	4p_50	4	50	12	0
WT	15	2137	1	1	TSeries-03092019-0946-004	4p_50	4	50	13	0
WT	15	2137	1	1	TSeries-03092019-0946-004	4p_50	4	50	14	0
WT	15	2137	1	1	TSeries-03092019-0946-005	4p_25	4	25	0	0
WT	15	2137	1	1	TSeries-03092019-0946-005	4p_25	4	25	1	0
WT	15	2137	1	1	TSeries-03092019-0946-005	4p_25	4	25	2	0
WT	15	2137	1	1	TSeries-03092019-0946-005	4p_25	4	25	3	0
WT	15	2137	1	1	TSeries-03092019-0946-005	4p_25	4	25	4	0
WT	15	2137	1	1	TSeries-03092019-0946-005	4p_25	4	25	5	0
WT	15	2137	1	1	TSeries-03092019-0946-005	4p_25	4	25	6	0
WT	15	2137	1	1	TSeries-03092019-0946-005	4p_25	4	25	7	0
WT	15	2137	1	1	TSeries-03092019-0946-005	4p_25	4	25	8	0
WT	15	2137	1	1	TSeries-03092019-0946-005	4p_25	4	25	9	0
WT	15	2137	1	1	TSeries-03092019-0946-005	4p_25	4	25	10	0
WT	15	2137	1	1	TSeries-03092019-0946-005	4p_25	4	25	11	0
WT	15	2137	1	1	TSeries-03092019-0946-005	4p_25	4	25	12	0
WT	15	2137	1	1	TSeries-03092019-0946-005	4p_25	4	25	13	0
WT	15	2137	1	1	TSeries-03092019-0946-005	4p_25	4	25	14	0
WT	15	2137	1	1	TSeries-03092019-0946-006	1p_400	1	400	0	1	0.273733
WT	15	2137	1	1	TSeries-03092019-0946-006	1p_400	1	400	1	1	0.135642
WT	15	2137	1	1	TSeries-03092019-0946-006	1p_400	1	400	2	1	0.121174
WT	15	2137	1	1	TSeries-03092019-0946-006	1p_400	1	400	3	1	0.146488
WT	15	2137	1	1	TSeries-03092019-0946-006	1p_400	1	400	4	1	1.15717
WT	15	2137	1	1	TSeries-03092019-0946-006	1p_400	1	400	5	1	1.52662
WT	15	2137	1	1	TSeries-03092019-0946-006	1p_400	1	400	6	1	0.276952
WT	15	2137	1	1	TSeries-03092019-0946-006	1p_400	1	400	7	1	0.13723
WT	15	2137	1	1	TSeries-03092019-0946-006	1p_400	1	400	8	1	1.20575
WT	15	2137	1	1	TSeries-03092019-0946-006	1p_400	1	400	9	0
WT	15	2137	1	1	TSeries-03092019-0946-006	1p_400	1	400	10	1	1.07711
WT	15	2137	1	1	TSeries-03092019-0946-006	1p_400	1	400	11	1	0.602244
WT	15	2137	1	1	TSeries-03092019-0946-006	1p_400	1	400	12	1	0.974151
WT	15	2137	1	1	TSeries-03092019-0946-006	1p_400	1	400	13	1	0.235509
WT	15	2137	1	1	TSeries-03092019-0946-006	1p_400	1	400	14	1	0.272995
WT	15	2137	1	1	TSeries-03092019-0946-007	1p_200	1	200	0	0
WT	15	2137	1	1	TSeries-03092019-0946-007	1p_200	1	200	1	0
WT	15	2137	1	1	TSeries-03092019-0946-007	1p_200	1	200	2	0
WT	15	2137	1	1	TSeries-03092019-0946-007	1p_200	1	200	3	0
WT	15	2137	1	1	TSeries-03092019-0946-007	1p_200	1	200	4	1	1.35154
WT	15	2137	1	1	TSeries-03092019-0946-007	1p_200	1	200	5	0
WT	15	2137	1	1	TSeries-03092019-0946-007	1p_200	1	200	6	0
WT	15	2137	1	1	TSeries-03092019-0946-007	1p_200	1	200	7	0
WT	15	2137	1	1	TSeries-03092019-0946-007	1p_200	1	200	8	0
WT	15	2137	1	1	TSeries-03092019-0946-007	1p_200	1	200	9	1	0.32339
WT	15	2137	1	1	TSeries-03092019-0946-007	1p_200	1	200	10	0
WT	15	2137	1	1	TSeries-03092019-0946-007	1p_200	1	200	11	0
WT	15	2137	1	1	TSeries-03092019-0946-007	1p_200	1	200	12	1	0.128849
WT	15	2137	1	1	TSeries-03092019-0946-007	1p_200	1	200	13	0
WT	15	2137	1	1	TSeries-03092019-0946-007	1p_200	1	200	14	0
WT	15	2137	1	1	TSeries-03092019-0946-008	1p_100	1	100	0	0
WT	15	2137	1	1	TSeries-03092019-0946-008	1p_100	1	100	1	0
WT	15	2137	1	1	TSeries-03092019-0946-008	1p_100	1	100	2	0
WT	15	2137	1	1	TSeries-03092019-0946-008	1p_100	1	100	3	0
WT	15	2137	1	1	TSeries-03092019-0946-008	1p_100	1	100	4	0
WT	15	2137	1	1	TSeries-03092019-0946-008	1p_100	1	100	5	0
WT	15	2137	1	1	TSeries-03092019-0946-008	1p_100	1	100	6	0
WT	15	2137	1	1	TSeries-03092019-0946-008	1p_100	1	100	7	0
WT	15	2137	1	1	TSeries-03092019-0946-008	1p_100	1	100	8	0
WT	15	2137	1	1	TSeries-03092019-0946-008	1p_100	1	100	9	0
WT	15	2137	1	1	TSeries-03092019-0946-008	1p_100	1	100	10	0
WT	15	2137	1	1	TSeries-03092019-0946-008	1p_100	1	100	11	0
WT	15	2137	1	1	TSeries-03092019-0946-008	1p_100	1	100	12	0
WT	15	2137	1	1	TSeries-03092019-0946-008	1p_100	1	100	13	0
WT	15	2137	1	1	TSeries-03092019-0946-008	1p_100	1	100	14	0
WT	15	2137	1	1	TSeries-03092019-0946-009	1p_50	1	50	0	0
WT	15	2137	1	1	TSeries-03092019-0946-009	1p_50	1	50	1	0
WT	15	2137	1	1	TSeries-03092019-0946-009	1p_50	1	50	2	0
WT	15	2137	1	1	TSeries-03092019-0946-009	1p_50	1	50	3	0
WT	15	2137	1	1	TSeries-03092019-0946-009	1p_50	1	50	4	0
WT	15	2137	1	1	TSeries-03092019-0946-009	1p_50	1	50	5	0
WT	15	2137	1	1	TSeries-03092019-0946-009	1p_50	1	50	6	0
WT	15	2137	1	1	TSeries-03092019-0946-009	1p_50	1	50	7	0
WT	15	2137	1	1	TSeries-03092019-0946-009	1p_50	1	50	8	0
WT	15	2137	1	1	TSeries-03092019-0946-009	1p_50	1	50	9	0
WT	15	2137	1	1	TSeries-03092019-0946-009	1p_50	1	50	10	0
WT	15	2137	1	1	TSeries-03092019-0946-009	1p_50	1	50	11	0
WT	15	2137	1	1	TSeries-03092019-0946-009	1p_50	1	50	12	0
WT	15	2137	1	1	TSeries-03092019-0946-009	1p_50	1	50	13	0
WT	15	2137	1	1	TSeries-03092019-0946-009	1p_50	1	50	14	0
WT	15	2137	1	1	TSeries-03092019-0946-010	1p_25	1	25	0	0
WT	15	2137	1	1	TSeries-03092019-0946-010	1p_25	1	25	1	0
WT	15	2137	1	1	TSeries-03092019-0946-010	1p_25	1	25	2	0
WT	15	2137	1	1	TSeries-03092019-0946-010	1p_25	1	25	3	0
WT	15	2137	1	1	TSeries-03092019-0946-010	1p_25	1	25	4	0
WT	15	2137	1	1	TSeries-03092019-0946-010	1p_25	1	25	5	0
WT	15	2137	1	1	TSeries-03092019-0946-010	1p_25	1	25	6	0
WT	15	2137	1	1	TSeries-03092019-0946-010	1p_25	1	25	7	0
WT	15	2137	1	1	TSeries-03092019-0946-010	1p_25	1	25	8	0
WT	15	2137	1	1	TSeries-03092019-0946-010	1p_25	1	25	9	0
WT	15	2137	1	1	TSeries-03092019-0946-010	1p_25	1	25	10	0
WT	15	2137	1	1	TSeries-03092019-0946-010	1p_25	1	25	11	0
WT	15	2137	1	1	TSeries-03092019-0946-010	1p_25	1	25	12	0
WT	15	2137	1	1	TSeries-03092019-0946-010	1p_25	1	25	13	0
WT	15	2137	1	1	TSeries-03092019-0946-010	1p_25	1	25	14	0
WT	15	2137	1	2	TSeries-03092019-0946-011	4p_400	4	400	0	1	0.576887
WT	15	2137	1	2	TSeries-03092019-0946-011	4p_400	4	400	1	1	0.373057
WT	15	2137	1	2	TSeries-03092019-0946-011	4p_400	4	400	2	1	0.245238
WT	15	2137	1	2	TSeries-03092019-0946-011	4p_400	4	400	3	1	0.155913
WT	15	2137	1	2	TSeries-03092019-0946-011	4p_400	4	400	4	0
WT	15	2137	1	2	TSeries-03092019-0946-011	4p_400	4	400	5	1	0.756096
WT	15	2137	1	2	TSeries-03092019-0946-011	4p_400	4	400	6	1	0.067743
WT	15	2137	1	2	TSeries-03092019-0946-011	4p_400	4	400	7	1	0.193289
WT	15	2137	1	2	TSeries-03092019-0946-011	4p_400	4	400	8	1	0.267507
WT	15	2137	1	2	TSeries-03092019-0946-011	4p_400	4	400	9	1	0.204164
WT	15	2137	1	2	TSeries-03092019-0946-011	4p_400	4	400	10	1	0.263922
WT	15	2137	1	2	TSeries-03092019-0946-011	4p_400	4	400	11	1	0.277293
WT	15	2137	1	2	TSeries-03092019-0946-011	4p_400	4	400	12	1	0.281974
WT	15	2137	1	2	TSeries-03092019-0946-011	4p_400	4	400	13	1	0.353123
WT	15	2137	1	2	TSeries-03092019-0946-011	4p_400	4	400	14	1	0.156398
WT	15	2137	1	2	TSeries-03092019-0946-011	4p_400	4	400	15	0
WT	15	2137	1	2	TSeries-03092019-0946-012	4p_200	4	200	0	1	1.63326
WT	15	2137	1	2	TSeries-03092019-0946-012	4p_200	4	200	1	1	0.400148
WT	15	2137	1	2	TSeries-03092019-0946-012	4p_200	4	200	2	0
WT	15	2137	1	2	TSeries-03092019-0946-012	4p_200	4	200	3	1	2.31437
WT	15	2137	1	2	TSeries-03092019-0946-012	4p_200	4	200	4	1	0.123281
WT	15	2137	1	2	TSeries-03092019-0946-012	4p_200	4	200	5	1	1.03262
WT	15	2137	1	2	TSeries-03092019-0946-012	4p_200	4	200	6	0
WT	15	2137	1	2	TSeries-03092019-0946-012	4p_200	4	200	7	1	0.165478
WT	15	2137	1	2	TSeries-03092019-0946-012	4p_200	4	200	8	0
WT	15	2137	1	2	TSeries-03092019-0946-012	4p_200	4	200	9	1	0.347612
WT	15	2137	1	2	TSeries-03092019-0946-012	4p_200	4	200	10	0
WT	15	2137	1	2	TSeries-03092019-0946-012	4p_200	4	200	11	1	0.113985
WT	15	2137	1	2	TSeries-03092019-0946-012	4p_200	4	200	12	0
WT	15	2137	1	2	TSeries-03092019-0946-012	4p_200	4	200	13	0
WT	15	2137	1	2	TSeries-03092019-0946-012	4p_200	4	200	14	1	0.419625
WT	15	2137	1	2	TSeries-03092019-0946-012	4p_200	4	200	15	1	1.2669
WT	15	2137	1	2	TSeries-03092019-0946-013	4p_100	4	100	0	0
WT	15	2137	1	2	TSeries-03092019-0946-013	4p_100	4	100	1	0
WT	15	2137	1	2	TSeries-03092019-0946-013	4p_100	4	100	2	0
WT	15	2137	1	2	TSeries-03092019-0946-013	4p_100	4	100	3	0
WT	15	2137	1	2	TSeries-03092019-0946-013	4p_100	4	100	4	0
WT	15	2137	1	2	TSeries-03092019-0946-013	4p_100	4	100	5	0
WT	15	2137	1	2	TSeries-03092019-0946-013	4p_100	4	100	6	0
WT	15	2137	1	2	TSeries-03092019-0946-013	4p_100	4	100	7	0
WT	15	2137	1	2	TSeries-03092019-0946-013	4p_100	4	100	8	0
WT	15	2137	1	2	TSeries-03092019-0946-013	4p_100	4	100	9	0
WT	15	2137	1	2	TSeries-03092019-0946-013	4p_100	4	100	10	0
WT	15	2137	1	2	TSeries-03092019-0946-013	4p_100	4	100	11	0
WT	15	2137	1	2	TSeries-03092019-0946-013	4p_100	4	100	12	0
WT	15	2137	1	2	TSeries-03092019-0946-013	4p_100	4	100	13	0
WT	15	2137	1	2	TSeries-03092019-0946-013	4p_100	4	100	14	0
WT	15	2137	1	2	TSeries-03092019-0946-013	4p_100	4	100	15	0
WT	15	2137	1	2	TSeries-03092019-0946-014	4p_50	4	50	0	0
WT	15	2137	1	2	TSeries-03092019-0946-014	4p_50	4	50	1	0
WT	15	2137	1	2	TSeries-03092019-0946-014	4p_50	4	50	2	0
WT	15	2137	1	2	TSeries-03092019-0946-014	4p_50	4	50	3	0
WT	15	2137	1	2	TSeries-03092019-0946-014	4p_50	4	50	4	0
WT	15	2137	1	2	TSeries-03092019-0946-014	4p_50	4	50	5	0
WT	15	2137	1	2	TSeries-03092019-0946-014	4p_50	4	50	6	0
WT	15	2137	1	2	TSeries-03092019-0946-014	4p_50	4	50	7	0
WT	15	2137	1	2	TSeries-03092019-0946-014	4p_50	4	50	8	0
WT	15	2137	1	2	TSeries-03092019-0946-014	4p_50	4	50	9	0
WT	15	2137	1	2	TSeries-03092019-0946-014	4p_50	4	50	10	0
WT	15	2137	1	2	TSeries-03092019-0946-014	4p_50	4	50	11	0
WT	15	2137	1	2	TSeries-03092019-0946-014	4p_50	4	50	12	0
WT	15	2137	1	2	TSeries-03092019-0946-014	4p_50	4	50	13	0
WT	15	2137	1	2	TSeries-03092019-0946-014	4p_50	4	50	14	0
WT	15	2137	1	2	TSeries-03092019-0946-014	4p_50	4	50	15	0
WT	15	2137	1	2	TSeries-03092019-0946-015	4p_25	4	25	0	0
WT	15	2137	1	2	TSeries-03092019-0946-015	4p_25	4	25	1	0
WT	15	2137	1	2	TSeries-03092019-0946-015	4p_25	4	25	2	0
WT	15	2137	1	2	TSeries-03092019-0946-015	4p_25	4	25	3	0
WT	15	2137	1	2	TSeries-03092019-0946-015	4p_25	4	25	4	0
WT	15	2137	1	2	TSeries-03092019-0946-015	4p_25	4	25	5	0
WT	15	2137	1	2	TSeries-03092019-0946-015	4p_25	4	25	6	0
WT	15	2137	1	2	TSeries-03092019-0946-015	4p_25	4	25	7	0
WT	15	2137	1	2	TSeries-03092019-0946-015	4p_25	4	25	8	0
WT	15	2137	1	2	TSeries-03092019-0946-015	4p_25	4	25	9	0
WT	15	2137	1	2	TSeries-03092019-0946-015	4p_25	4	25	10	0
WT	15	2137	1	2	TSeries-03092019-0946-015	4p_25	4	25	11	0
WT	15	2137	1	2	TSeries-03092019-0946-015	4p_25	4	25	12	0
WT	15	2137	1	2	TSeries-03092019-0946-015	4p_25	4	25	13	0
WT	15	2137	1	2	TSeries-03092019-0946-015	4p_25	4	25	14	1	0.116901
WT	15	2137	1	2	TSeries-03092019-0946-015	4p_25	4	25	15	0
WT	15	2137	1	2	TSeries-03092019-0946-016	1p_400	1	400	0	0
WT	15	2137	1	2	TSeries-03092019-0946-016	1p_400	1	400	1	1	0.185393
WT	15	2137	1	2	TSeries-03092019-0946-016	1p_400	1	400	2	1	0.230174
WT	15	2137	1	2	TSeries-03092019-0946-016	1p_400	1	400	3	0
WT	15	2137	1	2	TSeries-03092019-0946-016	1p_400	1	400	4	0
WT	15	2137	1	2	TSeries-03092019-0946-016	1p_400	1	400	5	1	0.682789
WT	15	2137	1	2	TSeries-03092019-0946-016	1p_400	1	400	6	0
WT	15	2137	1	2	TSeries-03092019-0946-016	1p_400	1	400	7	0
WT	15	2137	1	2	TSeries-03092019-0946-016	1p_400	1	400	8	0
WT	15	2137	1	2	TSeries-03092019-0946-016	1p_400	1	400	9	1	0.230029
WT	15	2137	1	2	TSeries-03092019-0946-016	1p_400	1	400	10	1	1.1454
WT	15	2137	1	2	TSeries-03092019-0946-016	1p_400	1	400	11	1	0.348671
WT	15	2137	1	2	TSeries-03092019-0946-016	1p_400	1	400	12	0
WT	15	2137	1	2	TSeries-03092019-0946-016	1p_400	1	400	13	0
WT	15	2137	1	2	TSeries-03092019-0946-016	1p_400	1	400	14	1	0.174683
WT	15	2137	1	2	TSeries-03092019-0946-016	1p_400	1	400	15	0
WT	15	2137	1	2	TSeries-03092019-0946-017	1p_200	1	200	0	0
WT	15	2137	1	2	TSeries-03092019-0946-017	1p_200	1	200	1	1	0.182502
WT	15	2137	1	2	TSeries-03092019-0946-017	1p_200	1	200	2	0
WT	15	2137	1	2	TSeries-03092019-0946-017	1p_200	1	200	3	1	0.226733
WT	15	2137	1	2	TSeries-03092019-0946-017	1p_200	1	200	4	0
WT	15	2137	1	2	TSeries-03092019-0946-017	1p_200	1	200	5	1	0.894837
WT	15	2137	1	2	TSeries-03092019-0946-017	1p_200	1	200	6	0
WT	15	2137	1	2	TSeries-03092019-0946-017	1p_200	1	200	7	0
WT	15	2137	1	2	TSeries-03092019-0946-017	1p_200	1	200	8	0
WT	15	2137	1	2	TSeries-03092019-0946-017	1p_200	1	200	9	0
WT	15	2137	1	2	TSeries-03092019-0946-017	1p_200	1	200	10	0
WT	15	2137	1	2	TSeries-03092019-0946-017	1p_200	1	200	11	0
WT	15	2137	1	2	TSeries-03092019-0946-017	1p_200	1	200	12	0
WT	15	2137	1	2	TSeries-03092019-0946-017	1p_200	1	200	13	0
WT	15	2137	1	2	TSeries-03092019-0946-017	1p_200	1	200	14	0
WT	15	2137	1	2	TSeries-03092019-0946-017	1p_200	1	200	15	0
WT	15	2137	1	2	TSeries-03092019-0946-018	1p_100	1	100	0	0
WT	15	2137	1	2	TSeries-03092019-0946-018	1p_100	1	100	1	0
WT	15	2137	1	2	TSeries-03092019-0946-018	1p_100	1	100	2	0
WT	15	2137	1	2	TSeries-03092019-0946-018	1p_100	1	100	3	0
WT	15	2137	1	2	TSeries-03092019-0946-018	1p_100	1	100	4	0
WT	15	2137	1	2	TSeries-03092019-0946-018	1p_100	1	100	5	0
WT	15	2137	1	2	TSeries-03092019-0946-018	1p_100	1	100	6	0
WT	15	2137	1	2	TSeries-03092019-0946-018	1p_100	1	100	7	0
WT	15	2137	1	2	TSeries-03092019-0946-018	1p_100	1	100	8	0
WT	15	2137	1	2	TSeries-03092019-0946-018	1p_100	1	100	9	0
WT	15	2137	1	2	TSeries-03092019-0946-018	1p_100	1	100	10	0
WT	15	2137	1	2	TSeries-03092019-0946-018	1p_100	1	100	11	0
WT	15	2137	1	2	TSeries-03092019-0946-018	1p_100	1	100	12	0
WT	15	2137	1	2	TSeries-03092019-0946-018	1p_100	1	100	13	0
WT	15	2137	1	2	TSeries-03092019-0946-018	1p_100	1	100	14	0
WT	15	2137	1	2	TSeries-03092019-0946-018	1p_100	1	100	15	0
WT	15	2137	1	2	TSeries-03092019-0946-019	1p_50	1	50	0	0
WT	15	2137	1	2	TSeries-03092019-0946-019	1p_50	1	50	1	0
WT	15	2137	1	2	TSeries-03092019-0946-019	1p_50	1	50	2	0
WT	15	2137	1	2	TSeries-03092019-0946-019	1p_50	1	50	3	0
WT	15	2137	1	2	TSeries-03092019-0946-019	1p_50	1	50	4	0
WT	15	2137	1	2	TSeries-03092019-0946-019	1p_50	1	50	5	0
WT	15	2137	1	2	TSeries-03092019-0946-019	1p_50	1	50	6	0
WT	15	2137	1	2	TSeries-03092019-0946-019	1p_50	1	50	7	0
WT	15	2137	1	2	TSeries-03092019-0946-019	1p_50	1	50	8	0
WT	15	2137	1	2	TSeries-03092019-0946-019	1p_50	1	50	9	0
WT	15	2137	1	2	TSeries-03092019-0946-019	1p_50	1	50	10	0
WT	15	2137	1	2	TSeries-03092019-0946-019	1p_50	1	50	11	0
WT	15	2137	1	2	TSeries-03092019-0946-019	1p_50	1	50	12	0
WT	15	2137	1	2	TSeries-03092019-0946-019	1p_50	1	50	13	0
WT	15	2137	1	2	TSeries-03092019-0946-019	1p_50	1	50	14	0
WT	15	2137	1	2	TSeries-03092019-0946-019	1p_50	1	50	15	0
WT	15	2137	1	2	TSeries-03092019-0946-020	1p_25	1	25	0	0
WT	15	2137	1	2	TSeries-03092019-0946-020	1p_25	1	25	1	0
WT	15	2137	1	2	TSeries-03092019-0946-020	1p_25	1	25	2	0
WT	15	2137	1	2	TSeries-03092019-0946-020	1p_25	1	25	3	0
WT	15	2137	1	2	TSeries-03092019-0946-020	1p_25	1	25	4	0
WT	15	2137	1	2	TSeries-03092019-0946-020	1p_25	1	25	5	0
WT	15	2137	1	2	TSeries-03092019-0946-020	1p_25	1	25	6	0
WT	15	2137	1	2	TSeries-03092019-0946-020	1p_25	1	25	7	0
WT	15	2137	1	2	TSeries-03092019-0946-020	1p_25	1	25	8	0
WT	15	2137	1	2	TSeries-03092019-0946-020	1p_25	1	25	9	0
WT	15	2137	1	2	TSeries-03092019-0946-020	1p_25	1	25	10	0
WT	15	2137	1	2	TSeries-03092019-0946-020	1p_25	1	25	11	0
WT	15	2137	1	2	TSeries-03092019-0946-020	1p_25	1	25	12	0
WT	15	2137	1	2	TSeries-03092019-0946-020	1p_25	1	25	13	0
WT	15	2137	1	2	TSeries-03092019-0946-020	1p_25	1	25	14	0
WT	15	2137	1	2	TSeries-03092019-0946-020	1p_25	1	25	15	0
WT	15	2137	1	3	TSeries-03092019-0946-021	4p_400	4	400	0	1	0.515924
WT	15	2137	1	3	TSeries-03092019-0946-021	4p_400	4	400	1	1	0.648348
WT	15	2137	1	3	TSeries-03092019-0946-021	4p_400	4	400	2	1	2.61287
WT	15	2137	1	3	TSeries-03092019-0946-021	4p_400	4	400	3	0
WT	15	2137	1	3	TSeries-03092019-0946-021	4p_400	4	400	4	1	0.293219
WT	15	2137	1	3	TSeries-03092019-0946-021	4p_400	4	400	5	1	0.396502
WT	15	2137	1	3	TSeries-03092019-0946-021	4p_400	4	400	6	1	1.95948
WT	15	2137	1	3	TSeries-03092019-0946-021	4p_400	4	400	7	0
WT	15	2137	1	3	TSeries-03092019-0946-021	4p_400	4	400	8	1	0.427267
WT	15	2137	1	3	TSeries-03092019-0946-021	4p_400	4	400	9	1	1.34035
WT	15	2137	1	3	TSeries-03092019-0946-021	4p_400	4	400	10	1	0.54292
WT	15	2137	1	3	TSeries-03092019-0946-021	4p_400	4	400	11	1	1.38642
WT	15	2137	1	3	TSeries-03092019-0946-021	4p_400	4	400	12	0
WT	15	2137	1	3	TSeries-03092019-0946-021	4p_400	4	400	13	1	1.22905
WT	15	2137	1	3	TSeries-03092019-0946-022	4p_200	4	200	0	1	0.382646
WT	15	2137	1	3	TSeries-03092019-0946-022	4p_200	4	200	1	1	0.553232
WT	15	2137	1	3	TSeries-03092019-0946-022	4p_200	4	200	2	0
WT	15	2137	1	3	TSeries-03092019-0946-022	4p_200	4	200	3	0
WT	15	2137	1	3	TSeries-03092019-0946-022	4p_200	4	200	4	0
WT	15	2137	1	3	TSeries-03092019-0946-022	4p_200	4	200	5	0
WT	15	2137	1	3	TSeries-03092019-0946-022	4p_200	4	200	6	0
WT	15	2137	1	3	TSeries-03092019-0946-022	4p_200	4	200	7	0
WT	15	2137	1	3	TSeries-03092019-0946-022	4p_200	4	200	8	0
WT	15	2137	1	3	TSeries-03092019-0946-022	4p_200	4	200	9	1	1.3808
WT	15	2137	1	3	TSeries-03092019-0946-022	4p_200	4	200	10	0
WT	15	2137	1	3	TSeries-03092019-0946-022	4p_200	4	200	11	1	0.417162
WT	15	2137	1	3	TSeries-03092019-0946-022	4p_200	4	200	12	1	0.345337
WT	15	2137	1	3	TSeries-03092019-0946-022	4p_200	4	200	13	1	0.993818
WT	15	2137	1	3	TSeries-03092019-0946-023	4p_100	4	100	0	0
WT	15	2137	1	3	TSeries-03092019-0946-023	4p_100	4	100	1	0
WT	15	2137	1	3	TSeries-03092019-0946-023	4p_100	4	100	2	0
WT	15	2137	1	3	TSeries-03092019-0946-023	4p_100	4	100	3	0
WT	15	2137	1	3	TSeries-03092019-0946-023	4p_100	4	100	4	0
WT	15	2137	1	3	TSeries-03092019-0946-023	4p_100	4	100	5	0
WT	15	2137	1	3	TSeries-03092019-0946-023	4p_100	4	100	6	0
WT	15	2137	1	3	TSeries-03092019-0946-023	4p_100	4	100	7	0
WT	15	2137	1	3	TSeries-03092019-0946-023	4p_100	4	100	8	0
WT	15	2137	1	3	TSeries-03092019-0946-023	4p_100	4	100	9	0
WT	15	2137	1	3	TSeries-03092019-0946-023	4p_100	4	100	10	0
WT	15	2137	1	3	TSeries-03092019-0946-023	4p_100	4	100	11	0
WT	15	2137	1	3	TSeries-03092019-0946-023	4p_100	4	100	12	0
WT	15	2137	1	3	TSeries-03092019-0946-023	4p_100	4	100	13	0
WT	15	2137	1	3	TSeries-03092019-0946-024	4p_50	4	50	0	0
WT	15	2137	1	3	TSeries-03092019-0946-024	4p_50	4	50	1	0
WT	15	2137	1	3	TSeries-03092019-0946-024	4p_50	4	50	2	0
WT	15	2137	1	3	TSeries-03092019-0946-024	4p_50	4	50	3	0
WT	15	2137	1	3	TSeries-03092019-0946-024	4p_50	4	50	4	0
WT	15	2137	1	3	TSeries-03092019-0946-024	4p_50	4	50	5	0
WT	15	2137	1	3	TSeries-03092019-0946-024	4p_50	4	50	6	0
WT	15	2137	1	3	TSeries-03092019-0946-024	4p_50	4	50	7	0
WT	15	2137	1	3	TSeries-03092019-0946-024	4p_50	4	50	8	0
WT	15	2137	1	3	TSeries-03092019-0946-024	4p_50	4	50	9	0
WT	15	2137	1	3	TSeries-03092019-0946-024	4p_50	4	50	10	0
WT	15	2137	1	3	TSeries-03092019-0946-024	4p_50	4	50	11	0
WT	15	2137	1	3	TSeries-03092019-0946-024	4p_50	4	50	12	0
WT	15	2137	1	3	TSeries-03092019-0946-024	4p_50	4	50	13	0
WT	15	2137	1	3	TSeries-03092019-0946-025	4p_25	4	25	0	0
WT	15	2137	1	3	TSeries-03092019-0946-025	4p_25	4	25	1	0
WT	15	2137	1	3	TSeries-03092019-0946-025	4p_25	4	25	2	0
WT	15	2137	1	3	TSeries-03092019-0946-025	4p_25	4	25	3	0
WT	15	2137	1	3	TSeries-03092019-0946-025	4p_25	4	25	4	0
WT	15	2137	1	3	TSeries-03092019-0946-025	4p_25	4	25	5	0
WT	15	2137	1	3	TSeries-03092019-0946-025	4p_25	4	25	6	0
WT	15	2137	1	3	TSeries-03092019-0946-025	4p_25	4	25	7	0
WT	15	2137	1	3	TSeries-03092019-0946-025	4p_25	4	25	8	0
WT	15	2137	1	3	TSeries-03092019-0946-025	4p_25	4	25	9	0
WT	15	2137	1	3	TSeries-03092019-0946-025	4p_25	4	25	10	0
WT	15	2137	1	3	TSeries-03092019-0946-025	4p_25	4	25	11	0
WT	15	2137	1	3	TSeries-03092019-0946-025	4p_25	4	25	12	0
WT	15	2137	1	3	TSeries-03092019-0946-025	4p_25	4	25	13	0
WT	15	2137	1	3	TSeries-03092019-0946-026	1p_400	1	400	0	1	0.320098
WT	15	2137	1	3	TSeries-03092019-0946-026	1p_400	1	400	1	0
WT	15	2137	1	3	TSeries-03092019-0946-026	1p_400	1	400	2	1	1.10576
WT	15	2137	1	3	TSeries-03092019-0946-026	1p_400	1	400	3	0
WT	15	2137	1	3	TSeries-03092019-0946-026	1p_400	1	400	4	0
WT	15	2137	1	3	TSeries-03092019-0946-026	1p_400	1	400	5	0
WT	15	2137	1	3	TSeries-03092019-0946-026	1p_400	1	400	6	1	0.192115
WT	15	2137	1	3	TSeries-03092019-0946-026	1p_400	1	400	7	0
WT	15	2137	1	3	TSeries-03092019-0946-026	1p_400	1	400	8	0
WT	15	2137	1	3	TSeries-03092019-0946-026	1p_400	1	400	9	1	0.207156
WT	15	2137	1	3	TSeries-03092019-0946-026	1p_400	1	400	10	0
WT	15	2137	1	3	TSeries-03092019-0946-026	1p_400	1	400	11	1	0.698128
WT	15	2137	1	3	TSeries-03092019-0946-026	1p_400	1	400	12	1	0.209497
WT	15	2137	1	3	TSeries-03092019-0946-026	1p_400	1	400	13	1	0.203925
WT	15	2137	1	3	TSeries-03092019-0946-027	1p_200	1	200	0	1	0.169194
WT	15	2137	1	3	TSeries-03092019-0946-027	1p_200	1	200	1	0
WT	15	2137	1	3	TSeries-03092019-0946-027	1p_200	1	200	2	0
WT	15	2137	1	3	TSeries-03092019-0946-027	1p_200	1	200	3	0
WT	15	2137	1	3	TSeries-03092019-0946-027	1p_200	1	200	4	0
WT	15	2137	1	3	TSeries-03092019-0946-027	1p_200	1	200	5	0
WT	15	2137	1	3	TSeries-03092019-0946-027	1p_200	1	200	6	0
WT	15	2137	1	3	TSeries-03092019-0946-027	1p_200	1	200	7	0
WT	15	2137	1	3	TSeries-03092019-0946-027	1p_200	1	200	8	0
WT	15	2137	1	3	TSeries-03092019-0946-027	1p_200	1	200	9	0
WT	15	2137	1	3	TSeries-03092019-0946-027	1p_200	1	200	10	0
WT	15	2137	1	3	TSeries-03092019-0946-027	1p_200	1	200	11	1	0.665944
WT	15	2137	1	3	TSeries-03092019-0946-027	1p_200	1	200	12	0
WT	15	2137	1	3	TSeries-03092019-0946-027	1p_200	1	200	13	0
WT	15	2137	1	3	TSeries-03092019-0946-028	1p_100	1	100	0	0
WT	15	2137	1	3	TSeries-03092019-0946-028	1p_100	1	100	1	0
WT	15	2137	1	3	TSeries-03092019-0946-028	1p_100	1	100	2	0
WT	15	2137	1	3	TSeries-03092019-0946-028	1p_100	1	100	3	0
WT	15	2137	1	3	TSeries-03092019-0946-028	1p_100	1	100	4	0
WT	15	2137	1	3	TSeries-03092019-0946-028	1p_100	1	100	5	0
WT	15	2137	1	3	TSeries-03092019-0946-028	1p_100	1	100	6	0
WT	15	2137	1	3	TSeries-03092019-0946-028	1p_100	1	100	7	0
WT	15	2137	1	3	TSeries-03092019-0946-028	1p_100	1	100	8	0
WT	15	2137	1	3	TSeries-03092019-0946-028	1p_100	1	100	9	0
WT	15	2137	1	3	TSeries-03092019-0946-028	1p_100	1	100	10	0
WT	15	2137	1	3	TSeries-03092019-0946-028	1p_100	1	100	11	0
WT	15	2137	1	3	TSeries-03092019-0946-028	1p_100	1	100	12	0
WT	15	2137	1	3	TSeries-03092019-0946-028	1p_100	1	100	13	0
WT	15	2137	1	3	TSeries-03092019-0946-029	1p_50	1	50	0	0
WT	15	2137	1	3	TSeries-03092019-0946-029	1p_50	1	50	1	0
WT	15	2137	1	3	TSeries-03092019-0946-029	1p_50	1	50	2	0
WT	15	2137	1	3	TSeries-03092019-0946-029	1p_50	1	50	3	0
WT	15	2137	1	3	TSeries-03092019-0946-029	1p_50	1	50	4	0
WT	15	2137	1	3	TSeries-03092019-0946-029	1p_50	1	50	5	0
WT	15	2137	1	3	TSeries-03092019-0946-029	1p_50	1	50	6	0
WT	15	2137	1	3	TSeries-03092019-0946-029	1p_50	1	50	7	0
WT	15	2137	1	3	TSeries-03092019-0946-029	1p_50	1	50	8	0
WT	15	2137	1	3	TSeries-03092019-0946-029	1p_50	1	50	9	0
WT	15	2137	1	3	TSeries-03092019-0946-029	1p_50	1	50	10	0
WT	15	2137	1	3	TSeries-03092019-0946-029	1p_50	1	50	11	0
WT	15	2137	1	3	TSeries-03092019-0946-029	1p_50	1	50	12	0
WT	15	2137	1	3	TSeries-03092019-0946-029	1p_50	1	50	13	0
WT	15	2137	1	3	TSeries-03092019-0946-030	1p_25	1	25	0	0
WT	15	2137	1	3	TSeries-03092019-0946-030	1p_25	1	25	1	0
WT	15	2137	1	3	TSeries-03092019-0946-030	1p_25	1	25	2	0
WT	15	2137	1	3	TSeries-03092019-0946-030	1p_25	1	25	3	0
WT	15	2137	1	3	TSeries-03092019-0946-030	1p_25	1	25	4	0
WT	15	2137	1	3	TSeries-03092019-0946-030	1p_25	1	25	5	0
WT	15	2137	1	3	TSeries-03092019-0946-030	1p_25	1	25	6	0
WT	15	2137	1	3	TSeries-03092019-0946-030	1p_25	1	25	7	0
WT	15	2137	1	3	TSeries-03092019-0946-030	1p_25	1	25	8	0
WT	15	2137	1	3	TSeries-03092019-0946-030	1p_25	1	25	9	0
WT	15	2137	1	3	TSeries-03092019-0946-030	1p_25	1	25	10	0
WT	15	2137	1	3	TSeries-03092019-0946-030	1p_25	1	25	11	0
WT	15	2137	1	3	TSeries-03092019-0946-030	1p_25	1	25	12	0
WT	15	2137	1	3	TSeries-03092019-0946-030	1p_25	1	25	13	0
WT	15	2137	2	4	TSeries-03092019-0946-031	4p_400	4	400	0	0
WT	15	2137	2	4	TSeries-03092019-0946-031	4p_400	4	400	1	0
WT	15	2137	2	4	TSeries-03092019-0946-031	4p_400	4	400	2	0
WT	15	2137	2	4	TSeries-03092019-0946-031	4p_400	4	400	3	0
WT	15	2137	2	4	TSeries-03092019-0946-031	4p_400	4	400	4	0
WT	15	2137	2	4	TSeries-03092019-0946-031	4p_400	4	400	5	0
WT	15	2137	2	4	TSeries-03092019-0946-031	4p_400	4	400	6	0
WT	15	2137	2	4	TSeries-03092019-0946-031	4p_400	4	400	7	0
WT	15	2137	2	4	TSeries-03092019-0946-031	4p_400	4	400	8	0
WT	15	2137	2	4	TSeries-03092019-0946-031	4p_400	4	400	9	0
WT	15	2137	2	4	TSeries-03092019-0946-031	4p_400	4	400	10	1	2.0513
WT	15	2137	2	4	TSeries-03092019-0946-031	4p_400	4	400	11	0
WT	15	2137	2	4	TSeries-03092019-0946-032	4p_200	4	200	0	0
WT	15	2137	2	4	TSeries-03092019-0946-032	4p_200	4	200	1	0
WT	15	2137	2	4	TSeries-03092019-0946-032	4p_200	4	200	2	0
WT	15	2137	2	4	TSeries-03092019-0946-032	4p_200	4	200	3	0
WT	15	2137	2	4	TSeries-03092019-0946-032	4p_200	4	200	4	0
WT	15	2137	2	4	TSeries-03092019-0946-032	4p_200	4	200	5	0
WT	15	2137	2	4	TSeries-03092019-0946-032	4p_200	4	200	6	0
WT	15	2137	2	4	TSeries-03092019-0946-032	4p_200	4	200	7	0
WT	15	2137	2	4	TSeries-03092019-0946-032	4p_200	4	200	8	0
WT	15	2137	2	4	TSeries-03092019-0946-032	4p_200	4	200	9	0
WT	15	2137	2	4	TSeries-03092019-0946-032	4p_200	4	200	10	1	0.57476
WT	15	2137	2	4	TSeries-03092019-0946-032	4p_200	4	200	11	0
WT	15	2137	2	4	TSeries-03092019-0946-033	4p_100	4	100	0	0
WT	15	2137	2	4	TSeries-03092019-0946-033	4p_100	4	100	1	0
WT	15	2137	2	4	TSeries-03092019-0946-033	4p_100	4	100	2	0
WT	15	2137	2	4	TSeries-03092019-0946-033	4p_100	4	100	3	0
WT	15	2137	2	4	TSeries-03092019-0946-033	4p_100	4	100	4	0
WT	15	2137	2	4	TSeries-03092019-0946-033	4p_100	4	100	5	0
WT	15	2137	2	4	TSeries-03092019-0946-033	4p_100	4	100	6	0
WT	15	2137	2	4	TSeries-03092019-0946-033	4p_100	4	100	7	0
WT	15	2137	2	4	TSeries-03092019-0946-033	4p_100	4	100	8	0
WT	15	2137	2	4	TSeries-03092019-0946-033	4p_100	4	100	9	0
WT	15	2137	2	4	TSeries-03092019-0946-033	4p_100	4	100	10	0
WT	15	2137	2	4	TSeries-03092019-0946-033	4p_100	4	100	11	0
WT	15	2137	2	4	TSeries-03092019-0946-034	4p_50	4	50	0	0
WT	15	2137	2	4	TSeries-03092019-0946-034	4p_50	4	50	1	0
WT	15	2137	2	4	TSeries-03092019-0946-034	4p_50	4	50	2	0
WT	15	2137	2	4	TSeries-03092019-0946-034	4p_50	4	50	3	0
WT	15	2137	2	4	TSeries-03092019-0946-034	4p_50	4	50	4	1	0.127257
WT	15	2137	2	4	TSeries-03092019-0946-034	4p_50	4	50	5	0
WT	15	2137	2	4	TSeries-03092019-0946-034	4p_50	4	50	6	0
WT	15	2137	2	4	TSeries-03092019-0946-034	4p_50	4	50	7	0
WT	15	2137	2	4	TSeries-03092019-0946-034	4p_50	4	50	8	0
WT	15	2137	2	4	TSeries-03092019-0946-034	4p_50	4	50	9	0
WT	15	2137	2	4	TSeries-03092019-0946-034	4p_50	4	50	10	0
WT	15	2137	2	4	TSeries-03092019-0946-034	4p_50	4	50	11	0
WT	15	2137	2	4	TSeries-03092019-0946-035	4p_25	4	25	0	0
WT	15	2137	2	4	TSeries-03092019-0946-035	4p_25	4	25	1	0
WT	15	2137	2	4	TSeries-03092019-0946-035	4p_25	4	25	2	0
WT	15	2137	2	4	TSeries-03092019-0946-035	4p_25	4	25	3	0
WT	15	2137	2	4	TSeries-03092019-0946-035	4p_25	4	25	4	0
WT	15	2137	2	4	TSeries-03092019-0946-035	4p_25	4	25	5	0
WT	15	2137	2	4	TSeries-03092019-0946-035	4p_25	4	25	6	0
WT	15	2137	2	4	TSeries-03092019-0946-035	4p_25	4	25	7	0
WT	15	2137	2	4	TSeries-03092019-0946-035	4p_25	4	25	8	0
WT	15	2137	2	4	TSeries-03092019-0946-035	4p_25	4	25	9	0
WT	15	2137	2	4	TSeries-03092019-0946-035	4p_25	4	25	10	0
WT	15	2137	2	4	TSeries-03092019-0946-035	4p_25	4	25	11	0
WT	15	2137	2	4	TSeries-03092019-0946-036	1p_400	1	400	0	0
WT	15	2137	2	4	TSeries-03092019-0946-036	1p_400	1	400	1	0
WT	15	2137	2	4	TSeries-03092019-0946-036	1p_400	1	400	2	0
WT	15	2137	2	4	TSeries-03092019-0946-036	1p_400	1	400	3	0
WT	15	2137	2	4	TSeries-03092019-0946-036	1p_400	1	400	4	0
WT	15	2137	2	4	TSeries-03092019-0946-036	1p_400	1	400	5	0
WT	15	2137	2	4	TSeries-03092019-0946-036	1p_400	1	400	6	0
WT	15	2137	2	4	TSeries-03092019-0946-036	1p_400	1	400	7	0
WT	15	2137	2	4	TSeries-03092019-0946-036	1p_400	1	400	8	0
WT	15	2137	2	4	TSeries-03092019-0946-036	1p_400	1	400	9	0
WT	15	2137	2	4	TSeries-03092019-0946-036	1p_400	1	400	10	0
WT	15	2137	2	4	TSeries-03092019-0946-036	1p_400	1	400	11	0
WT	15	2137	2	4	TSeries-03092019-0946-037	1p_200	1	200	0	0
WT	15	2137	2	4	TSeries-03092019-0946-037	1p_200	1	200	1	0
WT	15	2137	2	4	TSeries-03092019-0946-037	1p_200	1	200	2	0
WT	15	2137	2	4	TSeries-03092019-0946-037	1p_200	1	200	3	0
WT	15	2137	2	4	TSeries-03092019-0946-037	1p_200	1	200	4	0
WT	15	2137	2	4	TSeries-03092019-0946-037	1p_200	1	200	5	0
WT	15	2137	2	4	TSeries-03092019-0946-037	1p_200	1	200	6	0
WT	15	2137	2	4	TSeries-03092019-0946-037	1p_200	1	200	7	0
WT	15	2137	2	4	TSeries-03092019-0946-037	1p_200	1	200	8	0
WT	15	2137	2	4	TSeries-03092019-0946-037	1p_200	1	200	9	0
WT	15	2137	2	4	TSeries-03092019-0946-037	1p_200	1	200	10	0
WT	15	2137	2	4	TSeries-03092019-0946-037	1p_200	1	200	11	0
WT	15	2137	2	4	TSeries-03092019-0946-038	1p_100	1	100	0	0
WT	15	2137	2	4	TSeries-03092019-0946-038	1p_100	1	100	1	0
WT	15	2137	2	4	TSeries-03092019-0946-038	1p_100	1	100	2	0
WT	15	2137	2	4	TSeries-03092019-0946-038	1p_100	1	100	3	0
WT	15	2137	2	4	TSeries-03092019-0946-038	1p_100	1	100	4	0
WT	15	2137	2	4	TSeries-03092019-0946-038	1p_100	1	100	5	0
WT	15	2137	2	4	TSeries-03092019-0946-038	1p_100	1	100	6	0
WT	15	2137	2	4	TSeries-03092019-0946-038	1p_100	1	100	7	0
WT	15	2137	2	4	TSeries-03092019-0946-038	1p_100	1	100	8	0
WT	15	2137	2	4	TSeries-03092019-0946-038	1p_100	1	100	9	0
WT	15	2137	2	4	TSeries-03092019-0946-038	1p_100	1	100	10	0
WT	15	2137	2	4	TSeries-03092019-0946-038	1p_100	1	100	11	0
WT	15	2137	2	4	TSeries-03092019-0946-039	1p_50	1	50	0	0
WT	15	2137	2	4	TSeries-03092019-0946-039	1p_50	1	50	1	0
WT	15	2137	2	4	TSeries-03092019-0946-039	1p_50	1	50	2	0
WT	15	2137	2	4	TSeries-03092019-0946-039	1p_50	1	50	3	0
WT	15	2137	2	4	TSeries-03092019-0946-039	1p_50	1	50	4	0
WT	15	2137	2	4	TSeries-03092019-0946-039	1p_50	1	50	5	0
WT	15	2137	2	4	TSeries-03092019-0946-039	1p_50	1	50	6	0
WT	15	2137	2	4	TSeries-03092019-0946-039	1p_50	1	50	7	0
WT	15	2137	2	4	TSeries-03092019-0946-039	1p_50	1	50	8	0
WT	15	2137	2	4	TSeries-03092019-0946-039	1p_50	1	50	9	0
WT	15	2137	2	4	TSeries-03092019-0946-039	1p_50	1	50	10	0
WT	15	2137	2	4	TSeries-03092019-0946-039	1p_50	1	50	11	0
WT	15	2137	2	4	TSeries-03092019-0946-040	1p_25	1	25	0	0
WT	15	2137	2	4	TSeries-03092019-0946-040	1p_25	1	25	1	0
WT	15	2137	2	4	TSeries-03092019-0946-040	1p_25	1	25	2	0
WT	15	2137	2	4	TSeries-03092019-0946-040	1p_25	1	25	3	0
WT	15	2137	2	4	TSeries-03092019-0946-040	1p_25	1	25	4	0
WT	15	2137	2	4	TSeries-03092019-0946-040	1p_25	1	25	5	0
WT	15	2137	2	4	TSeries-03092019-0946-040	1p_25	1	25	6	0
WT	15	2137	2	4	TSeries-03092019-0946-040	1p_25	1	25	7	0
WT	15	2137	2	4	TSeries-03092019-0946-040	1p_25	1	25	8	0
WT	15	2137	2	4	TSeries-03092019-0946-040	1p_25	1	25	9	0
WT	15	2137	2	4	TSeries-03092019-0946-040	1p_25	1	25	10	0
WT	15	2137	2	4	TSeries-03092019-0946-040	1p_25	1	25	11	0
WT	15	2137	2	5	TSeries-03092019-0946-041	4p_400	4	400	0	0
WT	15	2137	2	5	TSeries-03092019-0946-041	4p_400	4	400	1	0
WT	15	2137	2	5	TSeries-03092019-0946-041	4p_400	4	400	2	0
WT	15	2137	2	5	TSeries-03092019-0946-041	4p_400	4	400	3	0
WT	15	2137	2	5	TSeries-03092019-0946-041	4p_400	4	400	4	0
WT	15	2137	2	5	TSeries-03092019-0946-041	4p_400	4	400	5	0
WT	15	2137	2	5	TSeries-03092019-0946-041	4p_400	4	400	6	0
WT	15	2137	2	5	TSeries-03092019-0946-041	4p_400	4	400	7	0
WT	15	2137	2	5	TSeries-03092019-0946-041	4p_400	4	400	8	0
WT	15	2137	2	5	TSeries-03092019-0946-041	4p_400	4	400	9	0
WT	15	2137	2	5	TSeries-03092019-0946-041	4p_400	4	400	10	0
WT	15	2137	2	5	TSeries-03092019-0946-041	4p_400	4	400	11	0
WT	15	2137	2	5	TSeries-03092019-0946-041	4p_400	4	400	12	0
WT	15	2137	2	5	TSeries-03092019-0946-041	4p_400	4	400	13	0
WT	15	2137	2	5	TSeries-03092019-0946-041	4p_400	4	400	14	0
WT	15	2137	2	5	TSeries-03092019-0946-041	4p_400	4	400	15	0
WT	15	2137	2	5	TSeries-03092019-0946-042	4p_200	4	200	0	0
WT	15	2137	2	5	TSeries-03092019-0946-042	4p_200	4	200	1	0
WT	15	2137	2	5	TSeries-03092019-0946-042	4p_200	4	200	2	0
WT	15	2137	2	5	TSeries-03092019-0946-042	4p_200	4	200	3	0
WT	15	2137	2	5	TSeries-03092019-0946-042	4p_200	4	200	4	0
WT	15	2137	2	5	TSeries-03092019-0946-042	4p_200	4	200	5	0
WT	15	2137	2	5	TSeries-03092019-0946-042	4p_200	4	200	6	0
WT	15	2137	2	5	TSeries-03092019-0946-042	4p_200	4	200	7	0
WT	15	2137	2	5	TSeries-03092019-0946-042	4p_200	4	200	8	0
WT	15	2137	2	5	TSeries-03092019-0946-042	4p_200	4	200	9	0
WT	15	2137	2	5	TSeries-03092019-0946-042	4p_200	4	200	10	0
WT	15	2137	2	5	TSeries-03092019-0946-042	4p_200	4	200	11	0
WT	15	2137	2	5	TSeries-03092019-0946-042	4p_200	4	200	12	0
WT	15	2137	2	5	TSeries-03092019-0946-042	4p_200	4	200	13	0
WT	15	2137	2	5	TSeries-03092019-0946-042	4p_200	4	200	14	0
WT	15	2137	2	5	TSeries-03092019-0946-042	4p_200	4	200	15	0
WT	15	2137	2	5	TSeries-03092019-0946-043	4p_100	4	100	0	0
WT	15	2137	2	5	TSeries-03092019-0946-043	4p_100	4	100	1	0
WT	15	2137	2	5	TSeries-03092019-0946-043	4p_100	4	100	2	0
WT	15	2137	2	5	TSeries-03092019-0946-043	4p_100	4	100	3	0
WT	15	2137	2	5	TSeries-03092019-0946-043	4p_100	4	100	4	0
WT	15	2137	2	5	TSeries-03092019-0946-043	4p_100	4	100	5	0
WT	15	2137	2	5	TSeries-03092019-0946-043	4p_100	4	100	6	0
WT	15	2137	2	5	TSeries-03092019-0946-043	4p_100	4	100	7	0
WT	15	2137	2	5	TSeries-03092019-0946-043	4p_100	4	100	8	0
WT	15	2137	2	5	TSeries-03092019-0946-043	4p_100	4	100	9	0
WT	15	2137	2	5	TSeries-03092019-0946-043	4p_100	4	100	10	0
WT	15	2137	2	5	TSeries-03092019-0946-043	4p_100	4	100	11	0
WT	15	2137	2	5	TSeries-03092019-0946-043	4p_100	4	100	12	0
WT	15	2137	2	5	TSeries-03092019-0946-043	4p_100	4	100	13	0
WT	15	2137	2	5	TSeries-03092019-0946-043	4p_100	4	100	14	0
WT	15	2137	2	5	TSeries-03092019-0946-043	4p_100	4	100	15	0
WT	15	2137	2	5	TSeries-03092019-0946-044	4p_50	4	50	0	0
WT	15	2137	2	5	TSeries-03092019-0946-044	4p_50	4	50	1	0
WT	15	2137	2	5	TSeries-03092019-0946-044	4p_50	4	50	2	0
WT	15	2137	2	5	TSeries-03092019-0946-044	4p_50	4	50	3	0
WT	15	2137	2	5	TSeries-03092019-0946-044	4p_50	4	50	4	0
WT	15	2137	2	5	TSeries-03092019-0946-044	4p_50	4	50	5	0
WT	15	2137	2	5	TSeries-03092019-0946-044	4p_50	4	50	6	0
WT	15	2137	2	5	TSeries-03092019-0946-044	4p_50	4	50	7	0
WT	15	2137	2	5	TSeries-03092019-0946-044	4p_50	4	50	8	0
WT	15	2137	2	5	TSeries-03092019-0946-044	4p_50	4	50	9	0
WT	15	2137	2	5	TSeries-03092019-0946-044	4p_50	4	50	10	0
WT	15	2137	2	5	TSeries-03092019-0946-044	4p_50	4	50	11	0
WT	15	2137	2	5	TSeries-03092019-0946-044	4p_50	4	50	12	0
WT	15	2137	2	5	TSeries-03092019-0946-044	4p_50	4	50	13	0
WT	15	2137	2	5	TSeries-03092019-0946-044	4p_50	4	50	14	0
WT	15	2137	2	5	TSeries-03092019-0946-044	4p_50	4	50	15	0
WT	15	2137	2	5	TSeries-03092019-0946-045	4p_25	4	25	0	0
WT	15	2137	2	5	TSeries-03092019-0946-045	4p_25	4	25	1	0
WT	15	2137	2	5	TSeries-03092019-0946-045	4p_25	4	25	2	0
WT	15	2137	2	5	TSeries-03092019-0946-045	4p_25	4	25	3	0
WT	15	2137	2	5	TSeries-03092019-0946-045	4p_25	4	25	4	0
WT	15	2137	2	5	TSeries-03092019-0946-045	4p_25	4	25	5	0
WT	15	2137	2	5	TSeries-03092019-0946-045	4p_25	4	25	6	0
WT	15	2137	2	5	TSeries-03092019-0946-045	4p_25	4	25	7	0
WT	15	2137	2	5	TSeries-03092019-0946-045	4p_25	4	25	8	0
WT	15	2137	2	5	TSeries-03092019-0946-045	4p_25	4	25	9	0
WT	15	2137	2	5	TSeries-03092019-0946-045	4p_25	4	25	10	0
WT	15	2137	2	5	TSeries-03092019-0946-045	4p_25	4	25	11	0
WT	15	2137	2	5	TSeries-03092019-0946-045	4p_25	4	25	12	0
WT	15	2137	2	5	TSeries-03092019-0946-045	4p_25	4	25	13	0
WT	15	2137	2	5	TSeries-03092019-0946-045	4p_25	4	25	14	0
WT	15	2137	2	5	TSeries-03092019-0946-045	4p_25	4	25	15	0
WT	15	2137	2	5	TSeries-03092019-0946-046	1p_400	1	400	0	0
WT	15	2137	2	5	TSeries-03092019-0946-046	1p_400	1	400	1	0
WT	15	2137	2	5	TSeries-03092019-0946-046	1p_400	1	400	2	0
WT	15	2137	2	5	TSeries-03092019-0946-046	1p_400	1	400	3	0
WT	15	2137	2	5	TSeries-03092019-0946-046	1p_400	1	400	4	0
WT	15	2137	2	5	TSeries-03092019-0946-046	1p_400	1	400	5	0
WT	15	2137	2	5	TSeries-03092019-0946-046	1p_400	1	400	6	0
WT	15	2137	2	5	TSeries-03092019-0946-046	1p_400	1	400	7	0
WT	15	2137	2	5	TSeries-03092019-0946-046	1p_400	1	400	8	0
WT	15	2137	2	5	TSeries-03092019-0946-046	1p_400	1	400	9	0
WT	15	2137	2	5	TSeries-03092019-0946-046	1p_400	1	400	10	0
WT	15	2137	2	5	TSeries-03092019-0946-046	1p_400	1	400	11	0
WT	15	2137	2	5	TSeries-03092019-0946-046	1p_400	1	400	12	0
WT	15	2137	2	5	TSeries-03092019-0946-046	1p_400	1	400	13	0
WT	15	2137	2	5	TSeries-03092019-0946-046	1p_400	1	400	14	0
WT	15	2137	2	5	TSeries-03092019-0946-046	1p_400	1	400	15	0
WT	15	2137	2	5	TSeries-03092019-0946-047	1p_200	1	200	0	0
WT	15	2137	2	5	TSeries-03092019-0946-047	1p_200	1	200	1	0
WT	15	2137	2	5	TSeries-03092019-0946-047	1p_200	1	200	2	0
WT	15	2137	2	5	TSeries-03092019-0946-047	1p_200	1	200	3	0
WT	15	2137	2	5	TSeries-03092019-0946-047	1p_200	1	200	4	0
WT	15	2137	2	5	TSeries-03092019-0946-047	1p_200	1	200	5	0
WT	15	2137	2	5	TSeries-03092019-0946-047	1p_200	1	200	6	0
WT	15	2137	2	5	TSeries-03092019-0946-047	1p_200	1	200	7	0
WT	15	2137	2	5	TSeries-03092019-0946-047	1p_200	1	200	8	0
WT	15	2137	2	5	TSeries-03092019-0946-047	1p_200	1	200	9	0
WT	15	2137	2	5	TSeries-03092019-0946-047	1p_200	1	200	10	0
WT	15	2137	2	5	TSeries-03092019-0946-047	1p_200	1	200	11	0
WT	15	2137	2	5	TSeries-03092019-0946-047	1p_200	1	200	12	0
WT	15	2137	2	5	TSeries-03092019-0946-047	1p_200	1	200	13	0
WT	15	2137	2	5	TSeries-03092019-0946-047	1p_200	1	200	14	0
WT	15	2137	2	5	TSeries-03092019-0946-047	1p_200	1	200	15	0
WT	15	2137	2	5	TSeries-03092019-0946-048	1p_100	1	100	0	0
WT	15	2137	2	5	TSeries-03092019-0946-048	1p_100	1	100	1	0
WT	15	2137	2	5	TSeries-03092019-0946-048	1p_100	1	100	2	0
WT	15	2137	2	5	TSeries-03092019-0946-048	1p_100	1	100	3	0
WT	15	2137	2	5	TSeries-03092019-0946-048	1p_100	1	100	4	0
WT	15	2137	2	5	TSeries-03092019-0946-048	1p_100	1	100	5	0
WT	15	2137	2	5	TSeries-03092019-0946-048	1p_100	1	100	6	0
WT	15	2137	2	5	TSeries-03092019-0946-048	1p_100	1	100	7	0
WT	15	2137	2	5	TSeries-03092019-0946-048	1p_100	1	100	8	0
WT	15	2137	2	5	TSeries-03092019-0946-048	1p_100	1	100	9	0
WT	15	2137	2	5	TSeries-03092019-0946-048	1p_100	1	100	10	0
WT	15	2137	2	5	TSeries-03092019-0946-048	1p_100	1	100	11	0
WT	15	2137	2	5	TSeries-03092019-0946-048	1p_100	1	100	12	0
WT	15	2137	2	5	TSeries-03092019-0946-048	1p_100	1	100	13	0
WT	15	2137	2	5	TSeries-03092019-0946-048	1p_100	1	100	14	0
WT	15	2137	2	5	TSeries-03092019-0946-048	1p_100	1	100	15	0
WT	15	2137	2	5	TSeries-03092019-0946-049	1p_50	1	50	0	0
WT	15	2137	2	5	TSeries-03092019-0946-049	1p_50	1	50	1	0
WT	15	2137	2	5	TSeries-03092019-0946-049	1p_50	1	50	2	0
WT	15	2137	2	5	TSeries-03092019-0946-049	1p_50	1	50	3	0
WT	15	2137	2	5	TSeries-03092019-0946-049	1p_50	1	50	4	0
WT	15	2137	2	5	TSeries-03092019-0946-049	1p_50	1	50	5	0
WT	15	2137	2	5	TSeries-03092019-0946-049	1p_50	1	50	6	0
WT	15	2137	2	5	TSeries-03092019-0946-049	1p_50	1	50	7	0
WT	15	2137	2	5	TSeries-03092019-0946-049	1p_50	1	50	8	0
WT	15	2137	2	5	TSeries-03092019-0946-049	1p_50	1	50	9	0
WT	15	2137	2	5	TSeries-03092019-0946-049	1p_50	1	50	10	0
WT	15	2137	2	5	TSeries-03092019-0946-049	1p_50	1	50	11	0
WT	15	2137	2	5	TSeries-03092019-0946-049	1p_50	1	50	12	0
WT	15	2137	2	5	TSeries-03092019-0946-049	1p_50	1	50	13	0
WT	15	2137	2	5	TSeries-03092019-0946-049	1p_50	1	50	14	0
WT	15	2137	2	5	TSeries-03092019-0946-049	1p_50	1	50	15	0
WT	15	2137	2	5	TSeries-03092019-0946-050	1p_25	1	25	0	0
WT	15	2137	2	5	TSeries-03092019-0946-050	1p_25	1	25	1	0
WT	15	2137	2	5	TSeries-03092019-0946-050	1p_25	1	25	2	0
WT	15	2137	2	5	TSeries-03092019-0946-050	1p_25	1	25	3	0
WT	15	2137	2	5	TSeries-03092019-0946-050	1p_25	1	25	4	0
WT	15	2137	2	5	TSeries-03092019-0946-050	1p_25	1	25	5	0
WT	15	2137	2	5	TSeries-03092019-0946-050	1p_25	1	25	6	0
WT	15	2137	2	5	TSeries-03092019-0946-050	1p_25	1	25	7	0
WT	15	2137	2	5	TSeries-03092019-0946-050	1p_25	1	25	8	0
WT	15	2137	2	5	TSeries-03092019-0946-050	1p_25	1	25	9	0
WT	15	2137	2	5	TSeries-03092019-0946-050	1p_25	1	25	10	0
WT	15	2137	2	5	TSeries-03092019-0946-050	1p_25	1	25	11	0
WT	15	2137	2	5	TSeries-03092019-0946-050	1p_25	1	25	12	0
WT	15	2137	2	5	TSeries-03092019-0946-050	1p_25	1	25	13	0
WT	15	2137	2	5	TSeries-03092019-0946-050	1p_25	1	25	14	0
WT	15	2137	2	5	TSeries-03092019-0946-050	1p_25	1	25	15	0
WT	16	2304	1	1	TSeries-05032019-0942-001	4p_400	4	400	0	0
WT	16	2304	1	1	TSeries-05032019-0942-001	4p_400	4	400	1	0
WT	16	2304	1	1	TSeries-05032019-0942-001	4p_400	4	400	2	0
WT	16	2304	1	1	TSeries-05032019-0942-001	4p_400	4	400	3	0
WT	16	2304	1	1	TSeries-05032019-0942-001	4p_400	4	400	4	0
WT	16	2304	1	1	TSeries-05032019-0942-002	4p_200	4	200	0	0
WT	16	2304	1	1	TSeries-05032019-0942-002	4p_200	4	200	1	0
WT	16	2304	1	1	TSeries-05032019-0942-002	4p_200	4	200	2	0
WT	16	2304	1	1	TSeries-05032019-0942-002	4p_200	4	200	3	0
WT	16	2304	1	1	TSeries-05032019-0942-002	4p_200	4	200	4	0
WT	16	2304	1	1	TSeries-05032019-0942-003	4p_100	4	100	0	0
WT	16	2304	1	1	TSeries-05032019-0942-003	4p_100	4	100	1	0
WT	16	2304	1	1	TSeries-05032019-0942-003	4p_100	4	100	2	0
WT	16	2304	1	1	TSeries-05032019-0942-003	4p_100	4	100	3	0
WT	16	2304	1	1	TSeries-05032019-0942-003	4p_100	4	100	4	0
WT	16	2304	1	1	TSeries-05032019-0942-004	4p_50	4	50	0	0
WT	16	2304	1	1	TSeries-05032019-0942-004	4p_50	4	50	1	0
WT	16	2304	1	1	TSeries-05032019-0942-004	4p_50	4	50	2	0
WT	16	2304	1	1	TSeries-05032019-0942-004	4p_50	4	50	3	0
WT	16	2304	1	1	TSeries-05032019-0942-004	4p_50	4	50	4	0
WT	16	2304	1	1	TSeries-05032019-0942-005	4p_25	4	25	0	0
WT	16	2304	1	1	TSeries-05032019-0942-005	4p_25	4	25	1	0
WT	16	2304	1	1	TSeries-05032019-0942-005	4p_25	4	25	2	0
WT	16	2304	1	1	TSeries-05032019-0942-005	4p_25	4	25	3	0
WT	16	2304	1	1	TSeries-05032019-0942-005	4p_25	4	25	4	0
WT	16	2304	1	1	TSeries-05032019-0942-006	1p_400	1	400	0	0
WT	16	2304	1	1	TSeries-05032019-0942-006	1p_400	1	400	1	0
WT	16	2304	1	1	TSeries-05032019-0942-006	1p_400	1	400	2	0
WT	16	2304	1	1	TSeries-05032019-0942-006	1p_400	1	400	3	0
WT	16	2304	1	1	TSeries-05032019-0942-006	1p_400	1	400	4	0
WT	16	2304	1	1	TSeries-05032019-0942-007	1p_200	1	200	0	0
WT	16	2304	1	1	TSeries-05032019-0942-007	1p_200	1	200	1	0
WT	16	2304	1	1	TSeries-05032019-0942-007	1p_200	1	200	2	0
WT	16	2304	1	1	TSeries-05032019-0942-007	1p_200	1	200	3	0
WT	16	2304	1	1	TSeries-05032019-0942-007	1p_200	1	200	4	0
WT	16	2304	1	1	TSeries-05032019-0942-008	1p_100	1	100	0	0
WT	16	2304	1	1	TSeries-05032019-0942-008	1p_100	1	100	1	0
WT	16	2304	1	1	TSeries-05032019-0942-008	1p_100	1	100	2	0
WT	16	2304	1	1	TSeries-05032019-0942-008	1p_100	1	100	3	0
WT	16	2304	1	1	TSeries-05032019-0942-008	1p_100	1	100	4	0
WT	16	2304	1	1	TSeries-05032019-0942-009	1p_50	1	50	0	0
WT	16	2304	1	1	TSeries-05032019-0942-009	1p_50	1	50	1	0
WT	16	2304	1	1	TSeries-05032019-0942-009	1p_50	1	50	2	0
WT	16	2304	1	1	TSeries-05032019-0942-009	1p_50	1	50	3	0
WT	16	2304	1	1	TSeries-05032019-0942-009	1p_50	1	50	4	0
WT	16	2304	1	1	TSeries-05032019-0942-010	1p_25	1	25	0	0
WT	16	2304	1	1	TSeries-05032019-0942-010	1p_25	1	25	1	0
WT	16	2304	1	1	TSeries-05032019-0942-010	1p_25	1	25	2	0
WT	16	2304	1	1	TSeries-05032019-0942-010	1p_25	1	25	3	0
WT	16	2304	1	1	TSeries-05032019-0942-010	1p_25	1	25	4	0
WT	16	2304	2	2	TSeries-05032019-0942-011	4p_400	4	400	0	0
WT	16	2304	2	2	TSeries-05032019-0942-011	4p_400	4	400	1	0
WT	16	2304	2	2	TSeries-05032019-0942-011	4p_400	4	400	2	0
WT	16	2304	2	2	TSeries-05032019-0942-011	4p_400	4	400	3	0
WT	16	2304	2	2	TSeries-05032019-0942-011	4p_400	4	400	4	1	2.18205
WT	16	2304	2	2	TSeries-05032019-0942-011	4p_400	4	400	5	0
WT	16	2304	2	2	TSeries-05032019-0942-011	4p_400	4	400	6	0
WT	16	2304	2	2	TSeries-05032019-0942-012	4p_200	4	200	0	0
WT	16	2304	2	2	TSeries-05032019-0942-012	4p_200	4	200	1	0
WT	16	2304	2	2	TSeries-05032019-0942-012	4p_200	4	200	2	0
WT	16	2304	2	2	TSeries-05032019-0942-012	4p_200	4	200	3	0
WT	16	2304	2	2	TSeries-05032019-0942-012	4p_200	4	200	4	1	1.70071
WT	16	2304	2	2	TSeries-05032019-0942-012	4p_200	4	200	5	0
WT	16	2304	2	2	TSeries-05032019-0942-012	4p_200	4	200	6	0
WT	16	2304	2	2	TSeries-05032019-0942-013	4p_100	4	100	0	0
WT	16	2304	2	2	TSeries-05032019-0942-013	4p_100	4	100	1	0
WT	16	2304	2	2	TSeries-05032019-0942-013	4p_100	4	100	2	0
WT	16	2304	2	2	TSeries-05032019-0942-013	4p_100	4	100	3	0
WT	16	2304	2	2	TSeries-05032019-0942-013	4p_100	4	100	4	1	1.00938
WT	16	2304	2	2	TSeries-05032019-0942-013	4p_100	4	100	5	0
WT	16	2304	2	2	TSeries-05032019-0942-013	4p_100	4	100	6	0
WT	16	2304	2	2	TSeries-05032019-0942-014	4p_50	4	50	0	0
WT	16	2304	2	2	TSeries-05032019-0942-014	4p_50	4	50	1	0
WT	16	2304	2	2	TSeries-05032019-0942-014	4p_50	4	50	2	0
WT	16	2304	2	2	TSeries-05032019-0942-014	4p_50	4	50	3	0
WT	16	2304	2	2	TSeries-05032019-0942-014	4p_50	4	50	4	0
WT	16	2304	2	2	TSeries-05032019-0942-014	4p_50	4	50	5	0
WT	16	2304	2	2	TSeries-05032019-0942-014	4p_50	4	50	6	0
WT	16	2304	2	2	TSeries-05032019-0942-015	4p_25	4	25	0	0
WT	16	2304	2	2	TSeries-05032019-0942-015	4p_25	4	25	1	0
WT	16	2304	2	2	TSeries-05032019-0942-015	4p_25	4	25	2	0
WT	16	2304	2	2	TSeries-05032019-0942-015	4p_25	4	25	3	0
WT	16	2304	2	2	TSeries-05032019-0942-015	4p_25	4	25	4	0
WT	16	2304	2	2	TSeries-05032019-0942-015	4p_25	4	25	5	0
WT	16	2304	2	2	TSeries-05032019-0942-015	4p_25	4	25	6	0
WT	16	2304	2	2	TSeries-05032019-0942-016	1p_400	1	400	0	0
WT	16	2304	2	2	TSeries-05032019-0942-016	1p_400	1	400	1	0
WT	16	2304	2	2	TSeries-05032019-0942-016	1p_400	1	400	2	0
WT	16	2304	2	2	TSeries-05032019-0942-016	1p_400	1	400	3	0
WT	16	2304	2	2	TSeries-05032019-0942-016	1p_400	1	400	4	1	0.545954
WT	16	2304	2	2	TSeries-05032019-0942-016	1p_400	1	400	5	0
WT	16	2304	2	2	TSeries-05032019-0942-016	1p_400	1	400	6	0
WT	16	2304	2	2	TSeries-05032019-0942-017	1p_200	1	200	0	0
WT	16	2304	2	2	TSeries-05032019-0942-017	1p_200	1	200	1	0
WT	16	2304	2	2	TSeries-05032019-0942-017	1p_200	1	200	2	0
WT	16	2304	2	2	TSeries-05032019-0942-017	1p_200	1	200	3	0
WT	16	2304	2	2	TSeries-05032019-0942-017	1p_200	1	200	4	1	0.922396
WT	16	2304	2	2	TSeries-05032019-0942-017	1p_200	1	200	5	0
WT	16	2304	2	2	TSeries-05032019-0942-017	1p_200	1	200	6	0
WT	16	2304	2	2	TSeries-05032019-0942-018	1p_100	1	100	0	0
WT	16	2304	2	2	TSeries-05032019-0942-018	1p_100	1	100	1	0
WT	16	2304	2	2	TSeries-05032019-0942-018	1p_100	1	100	2	0
WT	16	2304	2	2	TSeries-05032019-0942-018	1p_100	1	100	3	0
WT	16	2304	2	2	TSeries-05032019-0942-018	1p_100	1	100	4	0
WT	16	2304	2	2	TSeries-05032019-0942-018	1p_100	1	100	5	0
WT	16	2304	2	2	TSeries-05032019-0942-018	1p_100	1	100	6	0
WT	16	2304	2	2	TSeries-05032019-0942-019	1p_50	1	50	0	0
WT	16	2304	2	2	TSeries-05032019-0942-019	1p_50	1	50	1	0
WT	16	2304	2	2	TSeries-05032019-0942-019	1p_50	1	50	2	0
WT	16	2304	2	2	TSeries-05032019-0942-019	1p_50	1	50	3	0
WT	16	2304	2	2	TSeries-05032019-0942-019	1p_50	1	50	4	0
WT	16	2304	2	2	TSeries-05032019-0942-019	1p_50	1	50	5	0
WT	16	2304	2	2	TSeries-05032019-0942-019	1p_50	1	50	6	0
WT	16	2304	2	2	TSeries-05032019-0942-020	1p_25	1	25	0	0
WT	16	2304	2	2	TSeries-05032019-0942-020	1p_25	1	25	1	0
WT	16	2304	2	2	TSeries-05032019-0942-020	1p_25	1	25	2	0
WT	16	2304	2	2	TSeries-05032019-0942-020	1p_25	1	25	3	0
WT	16	2304	2	2	TSeries-05032019-0942-020	1p_25	1	25	4	0
WT	16	2304	2	2	TSeries-05032019-0942-020	1p_25	1	25	5	0
WT	16	2304	2	2	TSeries-05032019-0942-020	1p_25	1	25	6	0
WT	16	2304	2	3	TSeries-05032019-0942-021	4p_400	4	400	0	0
WT	16	2304	2	3	TSeries-05032019-0942-021	4p_400	4	400	1	1	0.234739
WT	16	2304	2	3	TSeries-05032019-0942-021	4p_400	4	400	2	0
WT	16	2304	2	3	TSeries-05032019-0942-021	4p_400	4	400	3	0
WT	16	2304	2	3	TSeries-05032019-0942-021	4p_400	4	400	4	0
WT	16	2304	2	3	TSeries-05032019-0942-021	4p_400	4	400	5	0
WT	16	2304	2	3	TSeries-05032019-0942-021	4p_400	4	400	6	1	1.14241
WT	16	2304	2	3	TSeries-05032019-0942-021	4p_400	4	400	7	0
WT	16	2304	2	3	TSeries-05032019-0942-021	4p_400	4	400	8	0
WT	16	2304	2	3	TSeries-05032019-0942-021	4p_400	4	400	9	0
WT	16	2304	2	3	TSeries-05032019-0942-021	4p_400	4	400	10	0
WT	16	2304	2	3	TSeries-05032019-0942-022	4p_200	4	200	0	0
WT	16	2304	2	3	TSeries-05032019-0942-022	4p_200	4	200	1	0
WT	16	2304	2	3	TSeries-05032019-0942-022	4p_200	4	200	2	0
WT	16	2304	2	3	TSeries-05032019-0942-022	4p_200	4	200	3	0
WT	16	2304	2	3	TSeries-05032019-0942-022	4p_200	4	200	4	0
WT	16	2304	2	3	TSeries-05032019-0942-022	4p_200	4	200	5	0
WT	16	2304	2	3	TSeries-05032019-0942-022	4p_200	4	200	6	1	0.571389
WT	16	2304	2	3	TSeries-05032019-0942-022	4p_200	4	200	7	0
WT	16	2304	2	3	TSeries-05032019-0942-022	4p_200	4	200	8	0
WT	16	2304	2	3	TSeries-05032019-0942-022	4p_200	4	200	9	0
WT	16	2304	2	3	TSeries-05032019-0942-022	4p_200	4	200	10	0
WT	16	2304	2	3	TSeries-05032019-0942-023	4p_100	4	100	0	0
WT	16	2304	2	3	TSeries-05032019-0942-023	4p_100	4	100	1	0
WT	16	2304	2	3	TSeries-05032019-0942-023	4p_100	4	100	2	0
WT	16	2304	2	3	TSeries-05032019-0942-023	4p_100	4	100	3	0
WT	16	2304	2	3	TSeries-05032019-0942-023	4p_100	4	100	4	0
WT	16	2304	2	3	TSeries-05032019-0942-023	4p_100	4	100	5	0
WT	16	2304	2	3	TSeries-05032019-0942-023	4p_100	4	100	6	0
WT	16	2304	2	3	TSeries-05032019-0942-023	4p_100	4	100	7	0
WT	16	2304	2	3	TSeries-05032019-0942-023	4p_100	4	100	8	0
WT	16	2304	2	3	TSeries-05032019-0942-023	4p_100	4	100	9	0
WT	16	2304	2	3	TSeries-05032019-0942-023	4p_100	4	100	10	0
WT	16	2304	2	3	TSeries-05032019-0942-024	4p_50	4	50	0	0
WT	16	2304	2	3	TSeries-05032019-0942-024	4p_50	4	50	1	0
WT	16	2304	2	3	TSeries-05032019-0942-024	4p_50	4	50	2	0
WT	16	2304	2	3	TSeries-05032019-0942-024	4p_50	4	50	3	0
WT	16	2304	2	3	TSeries-05032019-0942-024	4p_50	4	50	4	0
WT	16	2304	2	3	TSeries-05032019-0942-024	4p_50	4	50	5	0
WT	16	2304	2	3	TSeries-05032019-0942-024	4p_50	4	50	6	0
WT	16	2304	2	3	TSeries-05032019-0942-024	4p_50	4	50	7	0
WT	16	2304	2	3	TSeries-05032019-0942-024	4p_50	4	50	8	0
WT	16	2304	2	3	TSeries-05032019-0942-024	4p_50	4	50	9	0
WT	16	2304	2	3	TSeries-05032019-0942-024	4p_50	4	50	10	0
WT	16	2304	2	3	TSeries-05032019-0942-025	4p_25	4	25	0	0
WT	16	2304	2	3	TSeries-05032019-0942-025	4p_25	4	25	1	0
WT	16	2304	2	3	TSeries-05032019-0942-025	4p_25	4	25	2	0
WT	16	2304	2	3	TSeries-05032019-0942-025	4p_25	4	25	3	0
WT	16	2304	2	3	TSeries-05032019-0942-025	4p_25	4	25	4	0
WT	16	2304	2	3	TSeries-05032019-0942-025	4p_25	4	25	5	0
WT	16	2304	2	3	TSeries-05032019-0942-025	4p_25	4	25	6	0
WT	16	2304	2	3	TSeries-05032019-0942-025	4p_25	4	25	7	0
WT	16	2304	2	3	TSeries-05032019-0942-025	4p_25	4	25	8	0
WT	16	2304	2	3	TSeries-05032019-0942-025	4p_25	4	25	9	0
WT	16	2304	2	3	TSeries-05032019-0942-025	4p_25	4	25	10	0
WT	16	2304	2	3	TSeries-05032019-0942-026	1p_400	1	400	0	0
WT	16	2304	2	3	TSeries-05032019-0942-026	1p_400	1	400	1	0
WT	16	2304	2	3	TSeries-05032019-0942-026	1p_400	1	400	2	0
WT	16	2304	2	3	TSeries-05032019-0942-026	1p_400	1	400	3	0
WT	16	2304	2	3	TSeries-05032019-0942-026	1p_400	1	400	4	0
WT	16	2304	2	3	TSeries-05032019-0942-026	1p_400	1	400	5	0
WT	16	2304	2	3	TSeries-05032019-0942-026	1p_400	1	400	6	0
WT	16	2304	2	3	TSeries-05032019-0942-026	1p_400	1	400	7	0
WT	16	2304	2	3	TSeries-05032019-0942-026	1p_400	1	400	8	0
WT	16	2304	2	3	TSeries-05032019-0942-026	1p_400	1	400	9	0
WT	16	2304	2	3	TSeries-05032019-0942-026	1p_400	1	400	10	0
WT	16	2304	2	3	TSeries-05032019-0942-027	1p_200	1	200	0	0
WT	16	2304	2	3	TSeries-05032019-0942-027	1p_200	1	200	1	0
WT	16	2304	2	3	TSeries-05032019-0942-027	1p_200	1	200	2	0
WT	16	2304	2	3	TSeries-05032019-0942-027	1p_200	1	200	3	0
WT	16	2304	2	3	TSeries-05032019-0942-027	1p_200	1	200	4	0
WT	16	2304	2	3	TSeries-05032019-0942-027	1p_200	1	200	5	0
WT	16	2304	2	3	TSeries-05032019-0942-027	1p_200	1	200	6	0
WT	16	2304	2	3	TSeries-05032019-0942-027	1p_200	1	200	7	0
WT	16	2304	2	3	TSeries-05032019-0942-027	1p_200	1	200	8	0
WT	16	2304	2	3	TSeries-05032019-0942-027	1p_200	1	200	9	0
WT	16	2304	2	3	TSeries-05032019-0942-027	1p_200	1	200	10	0
WT	16	2304	2	3	TSeries-05032019-0942-028	1p_100	1	100	0	0
WT	16	2304	2	3	TSeries-05032019-0942-028	1p_100	1	100	1	0
WT	16	2304	2	3	TSeries-05032019-0942-028	1p_100	1	100	2	0
WT	16	2304	2	3	TSeries-05032019-0942-028	1p_100	1	100	3	0
WT	16	2304	2	3	TSeries-05032019-0942-028	1p_100	1	100	4	0
WT	16	2304	2	3	TSeries-05032019-0942-028	1p_100	1	100	5	0
WT	16	2304	2	3	TSeries-05032019-0942-028	1p_100	1	100	6	0
WT	16	2304	2	3	TSeries-05032019-0942-028	1p_100	1	100	7	0
WT	16	2304	2	3	TSeries-05032019-0942-028	1p_100	1	100	8	0
WT	16	2304	2	3	TSeries-05032019-0942-028	1p_100	1	100	9	0
WT	16	2304	2	3	TSeries-05032019-0942-028	1p_100	1	100	10	0
WT	16	2304	2	3	TSeries-05032019-0942-029	1p_50	1	50	0	0
WT	16	2304	2	3	TSeries-05032019-0942-029	1p_50	1	50	1	0
WT	16	2304	2	3	TSeries-05032019-0942-029	1p_50	1	50	2	0
WT	16	2304	2	3	TSeries-05032019-0942-029	1p_50	1	50	3	0
WT	16	2304	2	3	TSeries-05032019-0942-029	1p_50	1	50	4	0
WT	16	2304	2	3	TSeries-05032019-0942-029	1p_50	1	50	5	0
WT	16	2304	2	3	TSeries-05032019-0942-029	1p_50	1	50	6	0
WT	16	2304	2	3	TSeries-05032019-0942-029	1p_50	1	50	7	0
WT	16	2304	2	3	TSeries-05032019-0942-029	1p_50	1	50	8	0
WT	16	2304	2	3	TSeries-05032019-0942-029	1p_50	1	50	9	0
WT	16	2304	2	3	TSeries-05032019-0942-029	1p_50	1	50	10	0
WT	16	2304	2	3	TSeries-05032019-0942-030	1p_25	1	25	0	0
WT	16	2304	2	3	TSeries-05032019-0942-030	1p_25	1	25	1	0
WT	16	2304	2	3	TSeries-05032019-0942-030	1p_25	1	25	2	0
WT	16	2304	2	3	TSeries-05032019-0942-030	1p_25	1	25	3	0
WT	16	2304	2	3	TSeries-05032019-0942-030	1p_25	1	25	4	0
WT	16	2304	2	3	TSeries-05032019-0942-030	1p_25	1	25	5	0
WT	16	2304	2	3	TSeries-05032019-0942-030	1p_25	1	25	6	0
WT	16	2304	2	3	TSeries-05032019-0942-030	1p_25	1	25	7	0
WT	16	2304	2	3	TSeries-05032019-0942-030	1p_25	1	25	8	0
WT	16	2304	2	3	TSeries-05032019-0942-030	1p_25	1	25	9	1	0.279054
WT	16	2304	2	3	TSeries-05032019-0942-030	1p_25	1	25	10	0
WT	16	2304	2	4	TSeries-05032019-0942-031	4p_400	4	400	0	0
WT	16	2304	2	4	TSeries-05032019-0942-031	4p_400	4	400	1	0
WT	16	2304	2	4	TSeries-05032019-0942-031	4p_400	4	400	2	1	0.585526
WT	16	2304	2	4	TSeries-05032019-0942-031	4p_400	4	400	3	1	1.75303
WT	16	2304	2	4	TSeries-05032019-0942-031	4p_400	4	400	4	0
WT	16	2304	2	4	TSeries-05032019-0942-031	4p_400	4	400	5	1	0.629132
WT	16	2304	2	4	TSeries-05032019-0942-031	4p_400	4	400	6	0
WT	16	2304	2	4	TSeries-05032019-0942-031	4p_400	4	400	7	1	0.282747
WT	16	2304	2	4	TSeries-05032019-0942-031	4p_400	4	400	8	0
WT	16	2304	2	4	TSeries-05032019-0942-031	4p_400	4	400	9	0
WT	16	2304	2	4	TSeries-05032019-0942-031	4p_400	4	400	10	1	1.73093
WT	16	2304	2	4	TSeries-05032019-0942-031	4p_400	4	400	11	1	0.507651
WT	16	2304	2	4	TSeries-05032019-0942-031	4p_400	4	400	12	1	0.278694
WT	16	2304	2	4	TSeries-05032019-0942-031	4p_400	4	400	13	0
WT	16	2304	2	4	TSeries-05032019-0942-031	4p_400	4	400	14	0
WT	16	2304	2	4	TSeries-05032019-0942-031	4p_400	4	400	15	1	0.853595
WT	16	2304	2	4	TSeries-05032019-0942-031	4p_400	4	400	16	1	0.457107
WT	16	2304	2	4	TSeries-05032019-0942-031	4p_400	4	400	17	0
WT	16	2304	2	4	TSeries-05032019-0942-031	4p_400	4	400	18	0
WT	16	2304	2	4	TSeries-05032019-0942-031	4p_400	4	400	19	1	0.454126
WT	16	2304	2	4	TSeries-05032019-0942-032	4p_200	4	200	0	0
WT	16	2304	2	4	TSeries-05032019-0942-032	4p_200	4	200	1	0
WT	16	2304	2	4	TSeries-05032019-0942-032	4p_200	4	200	2	0
WT	16	2304	2	4	TSeries-05032019-0942-032	4p_200	4	200	3	0
WT	16	2304	2	4	TSeries-05032019-0942-032	4p_200	4	200	4	0
WT	16	2304	2	4	TSeries-05032019-0942-032	4p_200	4	200	5	0
WT	16	2304	2	4	TSeries-05032019-0942-032	4p_200	4	200	6	0
WT	16	2304	2	4	TSeries-05032019-0942-032	4p_200	4	200	7	0
WT	16	2304	2	4	TSeries-05032019-0942-032	4p_200	4	200	8	0
WT	16	2304	2	4	TSeries-05032019-0942-032	4p_200	4	200	9	0
WT	16	2304	2	4	TSeries-05032019-0942-032	4p_200	4	200	10	0
WT	16	2304	2	4	TSeries-05032019-0942-032	4p_200	4	200	11	0
WT	16	2304	2	4	TSeries-05032019-0942-032	4p_200	4	200	12	0
WT	16	2304	2	4	TSeries-05032019-0942-032	4p_200	4	200	13	0
WT	16	2304	2	4	TSeries-05032019-0942-032	4p_200	4	200	14	0
WT	16	2304	2	4	TSeries-05032019-0942-032	4p_200	4	200	15	0
WT	16	2304	2	4	TSeries-05032019-0942-032	4p_200	4	200	16	0
WT	16	2304	2	4	TSeries-05032019-0942-032	4p_200	4	200	17	0
WT	16	2304	2	4	TSeries-05032019-0942-032	4p_200	4	200	18	0
WT	16	2304	2	4	TSeries-05032019-0942-032	4p_200	4	200	19	0
WT	16	2304	2	4	TSeries-05032019-0942-033	4p_100	4	100	0	0
WT	16	2304	2	4	TSeries-05032019-0942-033	4p_100	4	100	1	0
WT	16	2304	2	4	TSeries-05032019-0942-033	4p_100	4	100	2	0
WT	16	2304	2	4	TSeries-05032019-0942-033	4p_100	4	100	3	0
WT	16	2304	2	4	TSeries-05032019-0942-033	4p_100	4	100	4	0
WT	16	2304	2	4	TSeries-05032019-0942-033	4p_100	4	100	5	0
WT	16	2304	2	4	TSeries-05032019-0942-033	4p_100	4	100	6	0
WT	16	2304	2	4	TSeries-05032019-0942-033	4p_100	4	100	7	0
WT	16	2304	2	4	TSeries-05032019-0942-033	4p_100	4	100	8	0
WT	16	2304	2	4	TSeries-05032019-0942-033	4p_100	4	100	9	0
WT	16	2304	2	4	TSeries-05032019-0942-033	4p_100	4	100	10	0
WT	16	2304	2	4	TSeries-05032019-0942-033	4p_100	4	100	11	0
WT	16	2304	2	4	TSeries-05032019-0942-033	4p_100	4	100	12	0
WT	16	2304	2	4	TSeries-05032019-0942-033	4p_100	4	100	13	0
WT	16	2304	2	4	TSeries-05032019-0942-033	4p_100	4	100	14	0
WT	16	2304	2	4	TSeries-05032019-0942-033	4p_100	4	100	15	0
WT	16	2304	2	4	TSeries-05032019-0942-033	4p_100	4	100	16	0
WT	16	2304	2	4	TSeries-05032019-0942-033	4p_100	4	100	17	0
WT	16	2304	2	4	TSeries-05032019-0942-033	4p_100	4	100	18	0
WT	16	2304	2	4	TSeries-05032019-0942-033	4p_100	4	100	19	0
WT	16	2304	2	4	TSeries-05032019-0942-034	4p_50	4	50	0	0
WT	16	2304	2	4	TSeries-05032019-0942-034	4p_50	4	50	1	0
WT	16	2304	2	4	TSeries-05032019-0942-034	4p_50	4	50	2	0
WT	16	2304	2	4	TSeries-05032019-0942-034	4p_50	4	50	3	0
WT	16	2304	2	4	TSeries-05032019-0942-034	4p_50	4	50	4	0
WT	16	2304	2	4	TSeries-05032019-0942-034	4p_50	4	50	5	0
WT	16	2304	2	4	TSeries-05032019-0942-034	4p_50	4	50	6	0
WT	16	2304	2	4	TSeries-05032019-0942-034	4p_50	4	50	7	0
WT	16	2304	2	4	TSeries-05032019-0942-034	4p_50	4	50	8	0
WT	16	2304	2	4	TSeries-05032019-0942-034	4p_50	4	50	9	0
WT	16	2304	2	4	TSeries-05032019-0942-034	4p_50	4	50	10	0
WT	16	2304	2	4	TSeries-05032019-0942-034	4p_50	4	50	11	0
WT	16	2304	2	4	TSeries-05032019-0942-034	4p_50	4	50	12	0
WT	16	2304	2	4	TSeries-05032019-0942-034	4p_50	4	50	13	0
WT	16	2304	2	4	TSeries-05032019-0942-034	4p_50	4	50	14	0
WT	16	2304	2	4	TSeries-05032019-0942-034	4p_50	4	50	15	0
WT	16	2304	2	4	TSeries-05032019-0942-034	4p_50	4	50	16	0
WT	16	2304	2	4	TSeries-05032019-0942-034	4p_50	4	50	17	0
WT	16	2304	2	4	TSeries-05032019-0942-034	4p_50	4	50	18	0
WT	16	2304	2	4	TSeries-05032019-0942-034	4p_50	4	50	19	0
WT	16	2304	2	4	TSeries-05032019-0942-035	4p_25	4	25	0	0
WT	16	2304	2	4	TSeries-05032019-0942-035	4p_25	4	25	1	0
WT	16	2304	2	4	TSeries-05032019-0942-035	4p_25	4	25	2	0
WT	16	2304	2	4	TSeries-05032019-0942-035	4p_25	4	25	3	0
WT	16	2304	2	4	TSeries-05032019-0942-035	4p_25	4	25	4	0
WT	16	2304	2	4	TSeries-05032019-0942-035	4p_25	4	25	5	0
WT	16	2304	2	4	TSeries-05032019-0942-035	4p_25	4	25	6	0
WT	16	2304	2	4	TSeries-05032019-0942-035	4p_25	4	25	7	0
WT	16	2304	2	4	TSeries-05032019-0942-035	4p_25	4	25	8	0
WT	16	2304	2	4	TSeries-05032019-0942-035	4p_25	4	25	9	0
WT	16	2304	2	4	TSeries-05032019-0942-035	4p_25	4	25	10	0
WT	16	2304	2	4	TSeries-05032019-0942-035	4p_25	4	25	11	0
WT	16	2304	2	4	TSeries-05032019-0942-035	4p_25	4	25	12	0
WT	16	2304	2	4	TSeries-05032019-0942-035	4p_25	4	25	13	0
WT	16	2304	2	4	TSeries-05032019-0942-035	4p_25	4	25	14	0
WT	16	2304	2	4	TSeries-05032019-0942-035	4p_25	4	25	15	0
WT	16	2304	2	4	TSeries-05032019-0942-035	4p_25	4	25	16	0
WT	16	2304	2	4	TSeries-05032019-0942-035	4p_25	4	25	17	0
WT	16	2304	2	4	TSeries-05032019-0942-035	4p_25	4	25	18	0
WT	16	2304	2	4	TSeries-05032019-0942-035	4p_25	4	25	19	0
WT	16	2304	2	4	TSeries-05032019-0942-036	1p_400	1	400	0	0
WT	16	2304	2	4	TSeries-05032019-0942-036	1p_400	1	400	1	0
WT	16	2304	2	4	TSeries-05032019-0942-036	1p_400	1	400	2	0
WT	16	2304	2	4	TSeries-05032019-0942-036	1p_400	1	400	3	1	0.41238
WT	16	2304	2	4	TSeries-05032019-0942-036	1p_400	1	400	4	0
WT	16	2304	2	4	TSeries-05032019-0942-036	1p_400	1	400	5	1	0.418444
WT	16	2304	2	4	TSeries-05032019-0942-036	1p_400	1	400	6	0
WT	16	2304	2	4	TSeries-05032019-0942-036	1p_400	1	400	7	1	0.390305
WT	16	2304	2	4	TSeries-05032019-0942-036	1p_400	1	400	8	0
WT	16	2304	2	4	TSeries-05032019-0942-036	1p_400	1	400	9	0
WT	16	2304	2	4	TSeries-05032019-0942-036	1p_400	1	400	10	0
WT	16	2304	2	4	TSeries-05032019-0942-036	1p_400	1	400	11	0
WT	16	2304	2	4	TSeries-05032019-0942-036	1p_400	1	400	12	0
WT	16	2304	2	4	TSeries-05032019-0942-036	1p_400	1	400	13	0
WT	16	2304	2	4	TSeries-05032019-0942-036	1p_400	1	400	14	0
WT	16	2304	2	4	TSeries-05032019-0942-036	1p_400	1	400	15	0
WT	16	2304	2	4	TSeries-05032019-0942-036	1p_400	1	400	16	1	0.608536
WT	16	2304	2	4	TSeries-05032019-0942-036	1p_400	1	400	17	0
WT	16	2304	2	4	TSeries-05032019-0942-036	1p_400	1	400	18	0
WT	16	2304	2	4	TSeries-05032019-0942-036	1p_400	1	400	19	0
WT	16	2304	2	4	TSeries-05032019-0942-037	1p_200	1	200	0	0
WT	16	2304	2	4	TSeries-05032019-0942-037	1p_200	1	200	1	0
WT	16	2304	2	4	TSeries-05032019-0942-037	1p_200	1	200	2	0
WT	16	2304	2	4	TSeries-05032019-0942-037	1p_200	1	200	3	0
WT	16	2304	2	4	TSeries-05032019-0942-037	1p_200	1	200	4	0
WT	16	2304	2	4	TSeries-05032019-0942-037	1p_200	1	200	5	0
WT	16	2304	2	4	TSeries-05032019-0942-037	1p_200	1	200	6	0
WT	16	2304	2	4	TSeries-05032019-0942-037	1p_200	1	200	7	0
WT	16	2304	2	4	TSeries-05032019-0942-037	1p_200	1	200	8	0
WT	16	2304	2	4	TSeries-05032019-0942-037	1p_200	1	200	9	0
WT	16	2304	2	4	TSeries-05032019-0942-037	1p_200	1	200	10	0
WT	16	2304	2	4	TSeries-05032019-0942-037	1p_200	1	200	11	0
WT	16	2304	2	4	TSeries-05032019-0942-037	1p_200	1	200	12	0
WT	16	2304	2	4	TSeries-05032019-0942-037	1p_200	1	200	13	0
WT	16	2304	2	4	TSeries-05032019-0942-037	1p_200	1	200	14	0
WT	16	2304	2	4	TSeries-05032019-0942-037	1p_200	1	200	15	0
WT	16	2304	2	4	TSeries-05032019-0942-037	1p_200	1	200	16	0
WT	16	2304	2	4	TSeries-05032019-0942-037	1p_200	1	200	17	0
WT	16	2304	2	4	TSeries-05032019-0942-037	1p_200	1	200	18	0
WT	16	2304	2	4	TSeries-05032019-0942-037	1p_200	1	200	19	0
WT	16	2304	2	4	TSeries-05032019-0942-038	1p_100	1	100	0	0
WT	16	2304	2	4	TSeries-05032019-0942-038	1p_100	1	100	1	0
WT	16	2304	2	4	TSeries-05032019-0942-038	1p_100	1	100	2	0
WT	16	2304	2	4	TSeries-05032019-0942-038	1p_100	1	100	3	0
WT	16	2304	2	4	TSeries-05032019-0942-038	1p_100	1	100	4	0
WT	16	2304	2	4	TSeries-05032019-0942-038	1p_100	1	100	5	0
WT	16	2304	2	4	TSeries-05032019-0942-038	1p_100	1	100	6	0
WT	16	2304	2	4	TSeries-05032019-0942-038	1p_100	1	100	7	0
WT	16	2304	2	4	TSeries-05032019-0942-038	1p_100	1	100	8	0
WT	16	2304	2	4	TSeries-05032019-0942-038	1p_100	1	100	9	0
WT	16	2304	2	4	TSeries-05032019-0942-038	1p_100	1	100	10	0
WT	16	2304	2	4	TSeries-05032019-0942-038	1p_100	1	100	11	0
WT	16	2304	2	4	TSeries-05032019-0942-038	1p_100	1	100	12	0
WT	16	2304	2	4	TSeries-05032019-0942-038	1p_100	1	100	13	0
WT	16	2304	2	4	TSeries-05032019-0942-038	1p_100	1	100	14	0
WT	16	2304	2	4	TSeries-05032019-0942-038	1p_100	1	100	15	0
WT	16	2304	2	4	TSeries-05032019-0942-038	1p_100	1	100	16	0
WT	16	2304	2	4	TSeries-05032019-0942-038	1p_100	1	100	17	0
WT	16	2304	2	4	TSeries-05032019-0942-038	1p_100	1	100	18	0
WT	16	2304	2	4	TSeries-05032019-0942-038	1p_100	1	100	19	0
WT	16	2304	2	4	TSeries-05032019-0942-039	1p_50	1	50	0	0
WT	16	2304	2	4	TSeries-05032019-0942-039	1p_50	1	50	1	0
WT	16	2304	2	4	TSeries-05032019-0942-039	1p_50	1	50	2	0
WT	16	2304	2	4	TSeries-05032019-0942-039	1p_50	1	50	3	0
WT	16	2304	2	4	TSeries-05032019-0942-039	1p_50	1	50	4	0
WT	16	2304	2	4	TSeries-05032019-0942-039	1p_50	1	50	5	0
WT	16	2304	2	4	TSeries-05032019-0942-039	1p_50	1	50	6	1	0.17681
WT	16	2304	2	4	TSeries-05032019-0942-039	1p_50	1	50	7	0
WT	16	2304	2	4	TSeries-05032019-0942-039	1p_50	1	50	8	0
WT	16	2304	2	4	TSeries-05032019-0942-039	1p_50	1	50	9	0
WT	16	2304	2	4	TSeries-05032019-0942-039	1p_50	1	50	10	0
WT	16	2304	2	4	TSeries-05032019-0942-039	1p_50	1	50	11	0
WT	16	2304	2	4	TSeries-05032019-0942-039	1p_50	1	50	12	0
WT	16	2304	2	4	TSeries-05032019-0942-039	1p_50	1	50	13	0
WT	16	2304	2	4	TSeries-05032019-0942-039	1p_50	1	50	14	0
WT	16	2304	2	4	TSeries-05032019-0942-039	1p_50	1	50	15	0
WT	16	2304	2	4	TSeries-05032019-0942-039	1p_50	1	50	16	0
WT	16	2304	2	4	TSeries-05032019-0942-039	1p_50	1	50	17	0
WT	16	2304	2	4	TSeries-05032019-0942-039	1p_50	1	50	18	0
WT	16	2304	2	4	TSeries-05032019-0942-039	1p_50	1	50	19	0
WT	16	2304	2	4	TSeries-05032019-0942-040	1p_25	1	25	0	0
WT	16	2304	2	4	TSeries-05032019-0942-040	1p_25	1	25	1	0
WT	16	2304	2	4	TSeries-05032019-0942-040	1p_25	1	25	2	0
WT	16	2304	2	4	TSeries-05032019-0942-040	1p_25	1	25	3	0
WT	16	2304	2	4	TSeries-05032019-0942-040	1p_25	1	25	4	0
WT	16	2304	2	4	TSeries-05032019-0942-040	1p_25	1	25	5	0
WT	16	2304	2	4	TSeries-05032019-0942-040	1p_25	1	25	6	0
WT	16	2304	2	4	TSeries-05032019-0942-040	1p_25	1	25	7	0
WT	16	2304	2	4	TSeries-05032019-0942-040	1p_25	1	25	8	0
WT	16	2304	2	4	TSeries-05032019-0942-040	1p_25	1	25	9	0
WT	16	2304	2	4	TSeries-05032019-0942-040	1p_25	1	25	10	0
WT	16	2304	2	4	TSeries-05032019-0942-040	1p_25	1	25	11	0
WT	16	2304	2	4	TSeries-05032019-0942-040	1p_25	1	25	12	0
WT	16	2304	2	4	TSeries-05032019-0942-040	1p_25	1	25	13	0
WT	16	2304	2	4	TSeries-05032019-0942-040	1p_25	1	25	14	0
WT	16	2304	2	4	TSeries-05032019-0942-040	1p_25	1	25	15	0
WT	16	2304	2	4	TSeries-05032019-0942-040	1p_25	1	25	16	0
WT	16	2304	2	4	TSeries-05032019-0942-040	1p_25	1	25	17	0
WT	16	2304	2	4	TSeries-05032019-0942-040	1p_25	1	25	18	0
[truncated: 21,670 more rows]

## Sheet: young adult - by cell
Genotype	age	mouse	slice	field	File name	condition	pulses	power	Cell Num	Activation	Amplitude	Spikes	Activation_cond1	Amplitude_cond1	Spikes_cond1
Scn1a	48	2295	2	4	TSeries-05312019-1217-031	4p_500	4	500	0	1	1.13808	168.831	1	1.13808	2
Scn1a	48	2295	2	4	TSeries-05312019-1217-031	4p_500	4	500	1	1	0.472623	133.523	1	0.472623	1
Scn1a	48	2295	2	4	TSeries-05312019-1217-031	4p_500	4	500	2	1	0.855329	113.775	1	0.855329	1
Scn1a	48	2295	2	4	TSeries-05312019-1217-031	4p_500	4	500	3	1	0.848102	83.5798	1	0.848102	1
Scn1a	48	2295	2	4	TSeries-05312019-1217-031	4p_500	4	500	4	1	0.2126	105.126	1	0.2126	1
Scn1a	48	2295	2	4	TSeries-05312019-1217-031	4p_500	4	500	5	0		136.285	0
Scn1a	48	2295	2	4	TSeries-05312019-1217-031	4p_500	4	500	6	0		81.8248	0
Scn1a	48	2295	2	4	TSeries-05312019-1217-031	4p_500	4	500	7	1	0.631261	84.5871	1	0.631261	1
Scn1a	48	2295	2	4	TSeries-05312019-1217-031	4p_500	4	500	8	1	0.918405	101.418	1	0.918405	2
Scn1a	48	2295	2	4	TSeries-05312019-1217-031	4p_500	4	500	9	1	0.764164	180.751	1	0.764164	1
Scn1a	48	2295	2	4	TSeries-05312019-1217-031	4p_500	4	500	10	1	0.415209	60.9529	1	0.415209	1
Scn1a	48	2295	2	4	TSeries-05312019-1217-031	4p_500	4	500	11	0		44.8973	0
Scn1a	48	2295	2	4	TSeries-05312019-1217-031	4p_500	4	500	12	0		65.69	0
Scn1a	48	2295	2	4	TSeries-05312019-1217-031	4p_500	4	500	13	1	0.342243	81.951	1	0.342243	1
Scn1a	48	2295	2	4	TSeries-05312019-1217-031	4p_500	4	500	14	1	0.575341	103.206	1	0.575341	1
Scn1a	48	2295	2	4	TSeries-05312019-1217-031	4p_500	4	500	15	1	0.5562	124.041	1	0.5562	2
Scn1a	48	2295	2	4	TSeries-05312019-1217-031	4p_500	4	500	16	1	0.448993	34.3708	1	0.448993	1
Scn1a	48	2295	2	4	TSeries-05312019-1217-031	4p_500	4	500	17	1	2.09994	44.7887	1	2.09994	2
Scn1a	48	2295	2	4	TSeries-05312019-1217-031	4p_500	4	500	18	1	1.82639	67.0852	1	1.82639	2
Scn1a	48	2295	2	4	TSeries-05312019-1217-031	4p_500	4	500	19	1	1.63902	110.304	1	1.63902	2
Scn1a	48	2295	2	4	TSeries-05312019-1217-031	4p_500	4	500	20	1	0.99645	138.135	1	0.99645	2
Scn1a	48	2295	2	4	TSeries-05312019-1217-031	4p_500	4	500	21	1	1.39987	151.179	1	1.39987	2
Scn1a	48	2295	2	4	TSeries-05312019-1217-031	4p_500	4	500	22	1	1.54624	132.53	1	1.54624	2
Scn1a	48	2295	2	4	TSeries-05312019-1217-031	4p_500	4	500	23	1	0.828067	103.131	1	0.828067	1
Scn1a	48	2295	2	4	TSeries-05312019-1217-031	4p_500	4	500	24	1	1.29581	119.106	1	1.29581	1
Scn1a	48	2295	2	4	TSeries-05312019-1217-031	4p_500	4	500	25	1	0.619985	92.9777	1	0.619985	1
Scn1a	48	2295	2	4	TSeries-05312019-1217-031	4p_500	4	500	26	1	0.315615	66.0368	1	0.315615	1
Scn1a	48	2295	2	4	TSeries-05312019-1217-031	4p_500	4	500	27	1	0.830329	56.5425	1	0.830329	2
Scn1a	48	2295	2	4	TSeries-05312019-1217-031	4p_500	4	500	28	1	0.764683	36.4083	1	0.764683	2
Scn1a	48	2295	2	4	TSeries-05312019-1217-031	4p_500	4	500	29	1	1.4234	26.1865	1	1.4234	2
Scn1a	48	2295	2	4	TSeries-05312019-1217-031	4p_500	4	500	30	1	1.16504	62.1711	1	1.16504	2
Scn1a	48	2295	2	4	TSeries-05312019-1217-031	4p_500	4	500	31	1	1.07283	92.6552	1	1.07283	1
Scn1a	48	2295	2	4	TSeries-05312019-1217-031	4p_500	4	500	32	1	0.690409	110.181	1	0.690409	2
Scn1a	48	2295	2	4	TSeries-05312019-1217-031	4p_500	4	500	33	1	1.16625	129.782	1	1.16625	1
Scn1a	48	2295	2	4	TSeries-05312019-1217-031	4p_500	4	500	34	1	0.713803	112.211	1	0.713803	2
Scn1a	48	2295	2	4	TSeries-05312019-1217-031	4p_500	4	500	35	1	1.11594	95.2707	1	1.11594	2
Scn1a	48	2295	2	4	TSeries-05312019-1217-031	4p_500	4	500	36	1	1.28302	76.5854	1	1.28302	1
Scn1a	48	2295	2	4	TSeries-05312019-1217-031	4p_500	4	500	37	1	0.798024	70.1686	1	0.798024	1
Scn1a	48	2295	2	4	TSeries-05312019-1217-031	4p_500	4	500	38	1	0.888471	91.1203	1	0.888471	1
Scn1a	48	2295	2	4	TSeries-05312019-1217-031	4p_500	4	500	39	1	1.69106	106.801	1	1.69106	3
Scn1a	48	2295	2	4	TSeries-05312019-1217-031	4p_500	4	500	40	1	1.35178	138.854	1	1.35178	1
Scn1a	48	2295	2	4	TSeries-05312019-1217-031	4p_500	4	500	41	1	0.483396	127.826	1	0.483396	2
Scn1a	48	2295	2	4	TSeries-05312019-1217-031	4p_500	4	500	42	1	1.12408	101.857	1	1.12408	1
Scn1a	48	2295	2	4	TSeries-05312019-1217-031	4p_500	4	500	43	1	0.835866	56.8471	1	0.835866	2
Scn1a	48	2295	2	4	TSeries-05312019-1217-031	4p_500	4	500	44	1	0.643585	84.1423	1	0.643585	1
Scn1a	48	2295	2	4	TSeries-05312019-1217-031	4p_500	4	500	45	1	0.477128	45.1418	1	0.477128	1
Scn1a	48	2295	2	4	TSeries-05312019-1217-031	4p_500	4	500	46	1	0.32896	46.6798	1	0.32896	1
Scn1a	48	2295	2	4	TSeries-05312019-1217-031	4p_500	4	500	47	1	0.974984	51.7118	1	0.974984	2
Scn1a	48	2295	2	4	TSeries-05312019-1217-031	4p_500	4	500	48	1	0.961213	4.35439	1	0.961213	1
Scn1a	48	2295	2	4	TSeries-05312019-1217-031	4p_500	4	500	49	1	0.710494	131.883	1	0.710494	2
Scn1a	48	2295	2	4	TSeries-05312019-1217-032	4p_400	4	400	0	1	0.750407		1	0.750407	2
Scn1a	48	2295	2	4	TSeries-05312019-1217-032	4p_400	4	400	1	1	0.420946		1	0.420946	1
Scn1a	48	2295	2	4	TSeries-05312019-1217-032	4p_400	4	400	2	1	0.653495		1	0.653495	2
Scn1a	48	2295	2	4	TSeries-05312019-1217-032	4p_400	4	400	3	1	0.448805		1	0.448805	1
Scn1a	48	2295	2	4	TSeries-05312019-1217-032	4p_400	4	400	4	0			0
Scn1a	48	2295	2	4	TSeries-05312019-1217-032	4p_400	4	400	5	0			0
Scn1a	48	2295	2	4	TSeries-05312019-1217-032	4p_400	4	400	6	0			0
Scn1a	48	2295	2	4	TSeries-05312019-1217-032	4p_400	4	400	7	1	0.43511		1	0.43511	1
Scn1a	48	2295	2	4	TSeries-05312019-1217-032	4p_400	4	400	8	1	0.992279		1	0.992279	2
Scn1a	48	2295	2	4	TSeries-05312019-1217-032	4p_400	4	400	9	1	0.976618		1	0.976618	2
Scn1a	48	2295	2	4	TSeries-05312019-1217-032	4p_400	4	400	10	1	0.802198		1	0.802198	2
Scn1a	48	2295	2	4	TSeries-05312019-1217-032	4p_400	4	400	11	0			0
Scn1a	48	2295	2	4	TSeries-05312019-1217-032	4p_400	4	400	12	1	0.267302		0
Scn1a	48	2295	2	4	TSeries-05312019-1217-032	4p_400	4	400	13	0			0
Scn1a	48	2295	2	4	TSeries-05312019-1217-032	4p_400	4	400	14	1	0.629238		1	0.629238	2
Scn1a	48	2295	2	4	TSeries-05312019-1217-032	4p_400	4	400	15	1	0.865558		1	0.865558	2
Scn1a	48	2295	2	4	TSeries-05312019-1217-032	4p_400	4	400	16	1	0.458629		1	0.458629	1
Scn1a	48	2295	2	4	TSeries-05312019-1217-032	4p_400	4	400	17	1	1.37371		1	1.37371	2
Scn1a	48	2295	2	4	TSeries-05312019-1217-032	4p_400	4	400	18	0			0
Scn1a	48	2295	2	4	TSeries-05312019-1217-032	4p_400	4	400	19	1	1.60207		1	1.60207	2
Scn1a	48	2295	2	4	TSeries-05312019-1217-032	4p_400	4	400	20	1	0.724132		1	0.724132	1
Scn1a	48	2295	2	4	TSeries-05312019-1217-032	4p_400	4	400	21	0			0
Scn1a	48	2295	2	4	TSeries-05312019-1217-032	4p_400	4	400	22	1	1.26916		1	1.26916	2
Scn1a	48	2295	2	4	TSeries-05312019-1217-032	4p_400	4	400	23	1	0.381897		1	0.381897	1
Scn1a	48	2295	2	4	TSeries-05312019-1217-032	4p_400	4	400	24	1	0.431403		1	0.431403	1
Scn1a	48	2295	2	4	TSeries-05312019-1217-032	4p_400	4	400	25	1	0.530902		1	0.530902	1
Scn1a	48	2295	2	4	TSeries-05312019-1217-032	4p_400	4	400	26	1	0.21263		1	0.21263	1
Scn1a	48	2295	2	4	TSeries-05312019-1217-032	4p_400	4	400	27	1	0.37308		1	0.37308	1
Scn1a	48	2295	2	4	TSeries-05312019-1217-032	4p_400	4	400	28	1	0.47848		1	0.47848	2
Scn1a	48	2295	2	4	TSeries-05312019-1217-032	4p_400	4	400	29	1	1.90222		1	1.90222	3
Scn1a	48	2295	2	4	TSeries-05312019-1217-032	4p_400	4	400	30	0			0
Scn1a	48	2295	2	4	TSeries-05312019-1217-032	4p_400	4	400	31	0			0
Scn1a	48	2295	2	4	TSeries-05312019-1217-032	4p_400	4	400	32	1	0.658155		1	0.658155	2
Scn1a	48	2295	2	4	TSeries-05312019-1217-032	4p_400	4	400	33	1	1.19523		1	1.19523	2
Scn1a	48	2295	2	4	TSeries-05312019-1217-032	4p_400	4	400	34	1	0.441822		1	0.441822	1
Scn1a	48	2295	2	4	TSeries-05312019-1217-032	4p_400	4	400	35	1	0.85759		1	0.85759	1
Scn1a	48	2295	2	4	TSeries-05312019-1217-032	4p_400	4	400	36	1	0.352042		1	0.352042	2
Scn1a	48	2295	2	4	TSeries-05312019-1217-032	4p_400	4	400	37	1	0.710087		1	0.710087	2
Scn1a	48	2295	2	4	TSeries-05312019-1217-032	4p_400	4	400	38	1	0.623751		1	0.623751	1
Scn1a	48	2295	2	4	TSeries-05312019-1217-032	4p_400	4	400	39	1	0.589278		1	0.589278	1
Scn1a	48	2295	2	4	TSeries-05312019-1217-032	4p_400	4	400	40	1	0.426682		1	0.426682	1
Scn1a	48	2295	2	4	TSeries-05312019-1217-032	4p_400	4	400	41	0			0
Scn1a	48	2295	2	4	TSeries-05312019-1217-032	4p_400	4	400	42	1	0.629459		1	0.629459	2
Scn1a	48	2295	2	4	TSeries-05312019-1217-032	4p_400	4	400	43	1	0.541569		1	0.541569	2
Scn1a	48	2295	2	4	TSeries-05312019-1217-032	4p_400	4	400	44	1	0.550558		1	0.550558	1
Scn1a	48	2295	2	4	TSeries-05312019-1217-032	4p_400	4	400	45	0			0
Scn1a	48	2295	2	4	TSeries-05312019-1217-032	4p_400	4	400	46	0			0
Scn1a	48	2295	2	4	TSeries-05312019-1217-032	4p_400	4	400	47	1	0.304098		1	0.304098	1
Scn1a	48	2295	2	4	TSeries-05312019-1217-032	4p_400	4	400	48	1	0.369807		1	0.369807	1
Scn1a	48	2295	2	4	TSeries-05312019-1217-032	4p_400	4	400	49	0			0
Scn1a	48	2295	2	4	TSeries-05312019-1217-033	4p_300	4	300	0	1	0.432848		1	0.432848	1
Scn1a	48	2295	2	4	TSeries-05312019-1217-033	4p_300	4	300	1	0			0
Scn1a	48	2295	2	4	TSeries-05312019-1217-033	4p_300	4	300	2	0			0
Scn1a	48	2295	2	4	TSeries-05312019-1217-033	4p_300	4	300	3	0			0
Scn1a	48	2295	2	4	TSeries-05312019-1217-033	4p_300	4	300	4	0			0
Scn1a	48	2295	2	4	TSeries-05312019-1217-033	4p_300	4	300	5	0			0
Scn1a	48	2295	2	4	TSeries-05312019-1217-033	4p_300	4	300	6	0			0
Scn1a	48	2295	2	4	TSeries-05312019-1217-033	4p_300	4	300	7	1	0.471524		1	0.471524	1
Scn1a	48	2295	2	4	TSeries-05312019-1217-033	4p_300	4	300	8	1	0.473904		1	0.473904	1
Scn1a	48	2295	2	4	TSeries-05312019-1217-033	4p_300	4	300	9	1	1.1724		1	1.1724	2
Scn1a	48	2295	2	4	TSeries-05312019-1217-033	4p_300	4	300	10	0			0
Scn1a	48	2295	2	4	TSeries-05312019-1217-033	4p_300	4	300	11	0			0
Scn1a	48	2295	2	4	TSeries-05312019-1217-033	4p_300	4	300	12	0			0
Scn1a	48	2295	2	4	TSeries-05312019-1217-033	4p_300	4	300	13	0			0
Scn1a	48	2295	2	4	TSeries-05312019-1217-033	4p_300	4	300	14	0			0
Scn1a	48	2295	2	4	TSeries-05312019-1217-033	4p_300	4	300	15	0			0
Scn1a	48	2295	2	4	TSeries-05312019-1217-033	4p_300	4	300	16	0			0
Scn1a	48	2295	2	4	TSeries-05312019-1217-033	4p_300	4	300	17	0			0
Scn1a	48	2295	2	4	TSeries-05312019-1217-033	4p_300	4	300	18	0			0
Scn1a	48	2295	2	4	TSeries-05312019-1217-033	4p_300	4	300	19	1	1.21343		1	1.21343	2
Scn1a	48	2295	2	4	TSeries-05312019-1217-033	4p_300	4	300	20	1	0.492418		1	0.492418	1
Scn1a	48	2295	2	4	TSeries-05312019-1217-033	4p_300	4	300	21	0			0
Scn1a	48	2295	2	4	TSeries-05312019-1217-033	4p_300	4	300	22	0			0
Scn1a	48	2295	2	4	TSeries-05312019-1217-033	4p_300	4	300	23	0			0
Scn1a	48	2295	2	4	TSeries-05312019-1217-033	4p_300	4	300	24	1	0.464918		1	0.464918	1
Scn1a	48	2295	2	4	TSeries-05312019-1217-033	4p_300	4	300	25	1	0.510497		1	0.510497	1
Scn1a	48	2295	2	4	TSeries-05312019-1217-033	4p_300	4	300	26	0			0
Scn1a	48	2295	2	4	TSeries-05312019-1217-033	4p_300	4	300	27	0			0
Scn1a	48	2295	2	4	TSeries-05312019-1217-033	4p_300	4	300	28	1	0.48328		1	0.48328	2
Scn1a	48	2295	2	4	TSeries-05312019-1217-033	4p_300	4	300	29	1	0.392197		1	0.392197	1
Scn1a	48	2295	2	4	TSeries-05312019-1217-033	4p_300	4	300	30	0			0
Scn1a	48	2295	2	4	TSeries-05312019-1217-033	4p_300	4	300	31	0			0
Scn1a	48	2295	2	4	TSeries-05312019-1217-033	4p_300	4	300	32	1	0.414769		1	0.414769	1
Scn1a	48	2295	2	4	TSeries-05312019-1217-033	4p_300	4	300	33	1	1.32646		1	1.32646	2
Scn1a	48	2295	2	4	TSeries-05312019-1217-033	4p_300	4	300	34	1	0.58248		1	0.58248	1
Scn1a	48	2295	2	4	TSeries-05312019-1217-033	4p_300	4	300	35	1	0.596833		1	0.596833	1
Scn1a	48	2295	2	4	TSeries-05312019-1217-033	4p_300	4	300	36	1	0.440376		1	0.440376	1
Scn1a	48	2295	2	4	TSeries-05312019-1217-033	4p_300	4	300	37	1	0.575501		1	0.575501	1
Scn1a	48	2295	2	4	TSeries-05312019-1217-033	4p_300	4	300	38	0			0
Scn1a	48	2295	2	4	TSeries-05312019-1217-033	4p_300	4	300	39	1	0.453028		1	0.453028	1
Scn1a	48	2295	2	4	TSeries-05312019-1217-033	4p_300	4	300	40	1	0.436963		1	0.436963	1
Scn1a	48	2295	2	4	TSeries-05312019-1217-033	4p_300	4	300	41	0			0
Scn1a	48	2295	2	4	TSeries-05312019-1217-033	4p_300	4	300	42	1	0.630322		1	0.630322	1
Scn1a	48	2295	2	4	TSeries-05312019-1217-033	4p_300	4	300	43	1	0.768138		1	0.768138	2
Scn1a	48	2295	2	4	TSeries-05312019-1217-033	4p_300	4	300	44	1	1.64822		1	1.64822	2
Scn1a	48	2295	2	4	TSeries-05312019-1217-033	4p_300	4	300	45	0			0
Scn1a	48	2295	2	4	TSeries-05312019-1217-033	4p_300	4	300	46	1	0.366821		1	0.366821	1
Scn1a	48	2295	2	4	TSeries-05312019-1217-033	4p_300	4	300	47	0			0
Scn1a	48	2295	2	4	TSeries-05312019-1217-033	4p_300	4	300	48	1	0.641656		1	0.641656	2
Scn1a	48	2295	2	4	TSeries-05312019-1217-033	4p_300	4	300	49	1	0.701959		1	0.701959	2
Scn1a	48	2295	2	4	TSeries-05312019-1217-034	4p_200	4	200	0	0			0
Scn1a	48	2295	2	4	TSeries-05312019-1217-034	4p_200	4	200	1	0			0
Scn1a	48	2295	2	4	TSeries-05312019-1217-034	4p_200	4	200	2	0			0
Scn1a	48	2295	2	4	TSeries-05312019-1217-034	4p_200	4	200	3	0			0
Scn1a	48	2295	2	4	TSeries-05312019-1217-034	4p_200	4	200	4	0			0
Scn1a	48	2295	2	4	TSeries-05312019-1217-034	4p_200	4	200	5	0			0
Scn1a	48	2295	2	4	TSeries-05312019-1217-034	4p_200	4	200	6	0			0
Scn1a	48	2295	2	4	TSeries-05312019-1217-034	4p_200	4	200	7	0			0
Scn1a	48	2295	2	4	TSeries-05312019-1217-034	4p_200	4	200	8	0			0
Scn1a	48	2295	2	4	TSeries-05312019-1217-034	4p_200	4	200	9	0			0
Scn1a	48	2295	2	4	TSeries-05312019-1217-034	4p_200	4	200	10	0			0
Scn1a	48	2295	2	4	TSeries-05312019-1217-034	4p_200	4	200	11	0			0
Scn1a	48	2295	2	4	TSeries-05312019-1217-034	4p_200	4	200	12	0			0
Scn1a	48	2295	2	4	TSeries-05312019-1217-034	4p_200	4	200	13	0			0
Scn1a	48	2295	2	4	TSeries-05312019-1217-034	4p_200	4	200	14	0			0
Scn1a	48	2295	2	4	TSeries-05312019-1217-034	4p_200	4	200	15	0			0
Scn1a	48	2295	2	4	TSeries-05312019-1217-034	4p_200	4	200	16	0			0
Scn1a	48	2295	2	4	TSeries-05312019-1217-034	4p_200	4	200	17	1	0.283872		1	0.283872	1
Scn1a	48	2295	2	4	TSeries-05312019-1217-034	4p_200	4	200	18	0			0
Scn1a	48	2295	2	4	TSeries-05312019-1217-034	4p_200	4	200	19	0			0
Scn1a	48	2295	2	4	TSeries-05312019-1217-034	4p_200	4	200	20	0			0
Scn1a	48	2295	2	4	TSeries-05312019-1217-034	4p_200	4	200	21	0			0
Scn1a	48	2295	2	4	TSeries-05312019-1217-034	4p_200	4	200	22	0			0
Scn1a	48	2295	2	4	TSeries-05312019-1217-034	4p_200	4	200	23	0			0
Scn1a	48	2295	2	4	TSeries-05312019-1217-034	4p_200	4	200	24	0			0
Scn1a	48	2295	2	4	TSeries-05312019-1217-034	4p_200	4	200	25	0			0
Scn1a	48	2295	2	4	TSeries-05312019-1217-034	4p_200	4	200	26	0			0
Scn1a	48	2295	2	4	TSeries-05312019-1217-034	4p_200	4	200	27	0			0
Scn1a	48	2295	2	4	TSeries-05312019-1217-034	4p_200	4	200	28	0			0
Scn1a	48	2295	2	4	TSeries-05312019-1217-034	4p_200	4	200	29	0			0
Scn1a	48	2295	2	4	TSeries-05312019-1217-034	4p_200	4	200	30	0			0
Scn1a	48	2295	2	4	TSeries-05312019-1217-034	4p_200	4	200	31	0			0
Scn1a	48	2295	2	4	TSeries-05312019-1217-034	4p_200	4	200	32	0			0
Scn1a	48	2295	2	4	TSeries-05312019-1217-034	4p_200	4	200	33	1	0.333727		1	0.333727	1
Scn1a	48	2295	2	4	TSeries-05312019-1217-034	4p_200	4	200	34	0			0
Scn1a	48	2295	2	4	TSeries-05312019-1217-034	4p_200	4	200	35	0			0
Scn1a	48	2295	2	4	TSeries-05312019-1217-034	4p_200	4	200	36	0			0
Scn1a	48	2295	2	4	TSeries-05312019-1217-034	4p_200	4	200	37	0			0
Scn1a	48	2295	2	4	TSeries-05312019-1217-034	4p_200	4	200	38	0			0
Scn1a	48	2295	2	4	TSeries-05312019-1217-034	4p_200	4	200	39	0			0
Scn1a	48	2295	2	4	TSeries-05312019-1217-034	4p_200	4	200	40	0			0
Scn1a	48	2295	2	4	TSeries-05312019-1217-034	4p_200	4	200	41	0			0
Scn1a	48	2295	2	4	TSeries-05312019-1217-034	4p_200	4	200	42	0			0
Scn1a	48	2295	2	4	TSeries-05312019-1217-034	4p_200	4	200	43	1	0.285099		1	0.285099	1
Scn1a	48	2295	2	4	TSeries-05312019-1217-034	4p_200	4	200	44	1	0.272497		1	0.272497	1
Scn1a	48	2295	2	4	TSeries-05312019-1217-034	4p_200	4	200	45	0			0
Scn1a	48	2295	2	4	TSeries-05312019-1217-034	4p_200	4	200	46	0			0
Scn1a	48	2295	2	4	TSeries-05312019-1217-034	4p_200	4	200	47	0			0
Scn1a	48	2295	2	4	TSeries-05312019-1217-034	4p_200	4	200	48	0			0
Scn1a	48	2295	2	4	TSeries-05312019-1217-034	4p_200	4	200	49	0			0
Scn1a	48	2295	2	4	TSeries-05312019-1217-035	4p_100	4	100	0	0			0
Scn1a	48	2295	2	4	TSeries-05312019-1217-035	4p_100	4	100	1	0			0
Scn1a	48	2295	2	4	TSeries-05312019-1217-035	4p_100	4	100	2	0			0
Scn1a	48	2295	2	4	TSeries-05312019-1217-035	4p_100	4	100	3	0			0
Scn1a	48	2295	2	4	TSeries-05312019-1217-035	4p_100	4	100	4	0			0
Scn1a	48	2295	2	4	TSeries-05312019-1217-035	4p_100	4	100	5	0			0
Scn1a	48	2295	2	4	TSeries-05312019-1217-035	4p_100	4	100	6	0			0
Scn1a	48	2295	2	4	TSeries-05312019-1217-035	4p_100	4	100	7	0			0
Scn1a	48	2295	2	4	TSeries-05312019-1217-035	4p_100	4	100	8	0			0
Scn1a	48	2295	2	4	TSeries-05312019-1217-035	4p_100	4	100	9	0			0
Scn1a	48	2295	2	4	TSeries-05312019-1217-035	4p_100	4	100	10	0			0
Scn1a	48	2295	2	4	TSeries-05312019-1217-035	4p_100	4	100	11	0			0
Scn1a	48	2295	2	4	TSeries-05312019-1217-035	4p_100	4	100	12	0			0
Scn1a	48	2295	2	4	TSeries-05312019-1217-035	4p_100	4	100	13	0			0
Scn1a	48	2295	2	4	TSeries-05312019-1217-035	4p_100	4	100	14	0			0
Scn1a	48	2295	2	4	TSeries-05312019-1217-035	4p_100	4	100	15	0			0
Scn1a	48	2295	2	4	TSeries-05312019-1217-035	4p_100	4	100	16	0			0
Scn1a	48	2295	2	4	TSeries-05312019-1217-035	4p_100	4	100	17	0			0
Scn1a	48	2295	2	4	TSeries-05312019-1217-035	4p_100	4	100	18	0			0
Scn1a	48	2295	2	4	TSeries-05312019-1217-035	4p_100	4	100	19	0			0
Scn1a	48	2295	2	4	TSeries-05312019-1217-035	4p_100	4	100	20	0			0
Scn1a	48	2295	2	4	TSeries-05312019-1217-035	4p_100	4	100	21	0			0
Scn1a	48	2295	2	4	TSeries-05312019-1217-035	4p_100	4	100	22	0			0
Scn1a	48	2295	2	4	TSeries-05312019-1217-035	4p_100	4	100	23	0			0
Scn1a	48	2295	2	4	TSeries-05312019-1217-035	4p_100	4	100	24	0			0
Scn1a	48	2295	2	4	TSeries-05312019-1217-035	4p_100	4	100	25	0			0
Scn1a	48	2295	2	4	TSeries-05312019-1217-035	4p_100	4	100	26	0			0
Scn1a	48	2295	2	4	TSeries-05312019-1217-035	4p_100	4	100	27	0			0
Scn1a	48	2295	2	4	TSeries-05312019-1217-035	4p_100	4	100	28	0			0
Scn1a	48	2295	2	4	TSeries-05312019-1217-035	4p_100	4	100	29	0			0
Scn1a	48	2295	2	4	TSeries-05312019-1217-035	4p_100	4	100	30	0			0
Scn1a	48	2295	2	4	TSeries-05312019-1217-035	4p_100	4	100	31	0			0
Scn1a	48	2295	2	4	TSeries-05312019-1217-035	4p_100	4	100	32	0			0
Scn1a	48	2295	2	4	TSeries-05312019-1217-035	4p_100	4	100	33	0			0
Scn1a	48	2295	2	4	TSeries-05312019-1217-035	4p_100	4	100	34	0			0
Scn1a	48	2295	2	4	TSeries-05312019-1217-035	4p_100	4	100	35	0			0
Scn1a	48	2295	2	4	TSeries-05312019-1217-035	4p_100	4	100	36	0			0
Scn1a	48	2295	2	4	TSeries-05312019-1217-035	4p_100	4	100	37	0			0
Scn1a	48	2295	2	4	TSeries-05312019-1217-035	4p_100	4	100	38	0			0
Scn1a	48	2295	2	4	TSeries-05312019-1217-035	4p_100	4	100	39	0			0
Scn1a	48	2295	2	4	TSeries-05312019-1217-035	4p_100	4	100	40	0			0
Scn1a	48	2295	2	4	TSeries-05312019-1217-035	4p_100	4	100	41	0			0
Scn1a	48	2295	2	4	TSeries-05312019-1217-035	4p_100	4	100	42	0			0
Scn1a	48	2295	2	4	TSeries-05312019-1217-035	4p_100	4	100	43	0			0
Scn1a	48	2295	2	4	TSeries-05312019-1217-035	4p_100	4	100	44	0			0
Scn1a	48	2295	2	4	TSeries-05312019-1217-035	4p_100	4	100	45	0			0
Scn1a	48	2295	2	4	TSeries-05312019-1217-035	4p_100	4	100	46	0			0
Scn1a	48	2295	2	4	TSeries-05312019-1217-035	4p_100	4	100	47	0			0
Scn1a	48	2295	2	4	TSeries-05312019-1217-035	4p_100	4	100	48	0			0
Scn1a	48	2295	2	4	TSeries-05312019-1217-035	4p_100	4	100	49	0			0
Scn1a	48	2295	2	4	TSeries-05312019-1217-036	1p_500	1	500	0	1	0.48075		1	0.48075	1
Scn1a	48	2295	2	4	TSeries-05312019-1217-036	1p_500	1	500	1	1	0.866864		1	0.866864	2
Scn1a	48	2295	2	4	TSeries-05312019-1217-036	1p_500	1	500	2	0			0
Scn1a	48	2295	2	4	TSeries-05312019-1217-036	1p_500	1	500	3	1	0.366579		1	0.366579	1
Scn1a	48	2295	2	4	TSeries-05312019-1217-036	1p_500	1	500	4	0			0
Scn1a	48	2295	2	4	TSeries-05312019-1217-036	1p_500	1	500	5	0			0
Scn1a	48	2295	2	4	TSeries-05312019-1217-036	1p_500	1	500	6	0			0
Scn1a	48	2295	2	4	TSeries-05312019-1217-036	1p_500	1	500	7	0			0
Scn1a	48	2295	2	4	TSeries-05312019-1217-036	1p_500	1	500	8	1	0.321949		1	0.321949	1
Scn1a	48	2295	2	4	TSeries-05312019-1217-036	1p_500	1	500	9	1	0.817736		1	0.817736	2
Scn1a	48	2295	2	4	TSeries-05312019-1217-036	1p_500	1	500	10	0			0
Scn1a	48	2295	2	4	TSeries-05312019-1217-036	1p_500	1	500	11	0			0
Scn1a	48	2295	2	4	TSeries-05312019-1217-036	1p_500	1	500	12	0			0
Scn1a	48	2295	2	4	TSeries-05312019-1217-036	1p_500	1	500	13	0			0
Scn1a	48	2295	2	4	TSeries-05312019-1217-036	1p_500	1	500	14	0			0
Scn1a	48	2295	2	4	TSeries-05312019-1217-036	1p_500	1	500	15	1	0.407617		1	0.407617	1
Scn1a	48	2295	2	4	TSeries-05312019-1217-036	1p_500	1	500	16	1	0.372093		1	0.372093	1
Scn1a	48	2295	2	4	TSeries-05312019-1217-036	1p_500	1	500	17	1	1.16947		1	1.16947	2
Scn1a	48	2295	2	4	TSeries-05312019-1217-036	1p_500	1	500	18	1	1.49886		1	1.49886	2
Scn1a	48	2295	2	4	TSeries-05312019-1217-036	1p_500	1	500	19	1	1.36179		1	1.36179	2
Scn1a	48	2295	2	4	TSeries-05312019-1217-036	1p_500	1	500	20	1	0.532745		1	0.532745	1
Scn1a	48	2295	2	4	TSeries-05312019-1217-036	1p_500	1	500	21	1	1.5251		1	1.5251	2
Scn1a	48	2295	2	4	TSeries-05312019-1217-036	1p_500	1	500	22	1	1.13514		1	1.13514	1
Scn1a	48	2295	2	4	TSeries-05312019-1217-036	1p_500	1	500	23	0			0
Scn1a	48	2295	2	4	TSeries-05312019-1217-036	1p_500	1	500	24	1	1.03097		1	1.03097	1
Scn1a	48	2295	2	4	TSeries-05312019-1217-036	1p_500	1	500	25	1	0.468387		1	0.468387	1
Scn1a	48	2295	2	4	TSeries-05312019-1217-036	1p_500	1	500	26	0			0
Scn1a	48	2295	2	4	TSeries-05312019-1217-036	1p_500	1	500	27	1	0.558463		1	0.558463	1
Scn1a	48	2295	2	4	TSeries-05312019-1217-036	1p_500	1	500	28	1	0.294559		1	0.294559	1
Scn1a	48	2295	2	4	TSeries-05312019-1217-036	1p_500	1	500	29	1	0.428562		1	0.428562	2
Scn1a	48	2295	2	4	TSeries-05312019-1217-036	1p_500	1	500	30	0			0
Scn1a	48	2295	2	4	TSeries-05312019-1217-036	1p_500	1	500	31	0			0
Scn1a	48	2295	2	4	TSeries-05312019-1217-036	1p_500	1	500	32	1	0.361561		1	0.361561	1
Scn1a	48	2295	2	4	TSeries-05312019-1217-036	1p_500	1	500	33	1	1.0206		1	1.0206	1
Scn1a	48	2295	2	4	TSeries-05312019-1217-036	1p_500	1	500	34	1	0.355323		1	0.355323	1
Scn1a	48	2295	2	4	TSeries-05312019-1217-036	1p_500	1	500	35	1	0.474422		1	0.474422	1
Scn1a	48	2295	2	4	TSeries-05312019-1217-036	1p_500	1	500	36	1	0.289207		1	0.289207	1
Scn1a	48	2295	2	4	TSeries-05312019-1217-036	1p_500	1	500	37	1	0.326555		1	0.326555	1
Scn1a	48	2295	2	4	TSeries-05312019-1217-036	1p_500	1	500	38	1	0.645735		1	0.645735	2
Scn1a	48	2295	2	4	TSeries-05312019-1217-036	1p_500	1	500	39	1	0.459915		1	0.459915	1
Scn1a	48	2295	2	4	TSeries-05312019-1217-036	1p_500	1	500	40	1	0.305432		1	0.305432	1
Scn1a	48	2295	2	4	TSeries-05312019-1217-036	1p_500	1	500	41	1	0.30146		1	0.30146	1
Scn1a	48	2295	2	4	TSeries-05312019-1217-036	1p_500	1	500	42	1	0.357606		1	0.357606	1
Scn1a	48	2295	2	4	TSeries-05312019-1217-036	1p_500	1	500	43	0			0
Scn1a	48	2295	2	4	TSeries-05312019-1217-036	1p_500	1	500	44	0			0
Scn1a	48	2295	2	4	TSeries-05312019-1217-036	1p_500	1	500	45	1	0.188284		1	0.188284	1
Scn1a	48	2295	2	4	TSeries-05312019-1217-036	1p_500	1	500	46	0			0
Scn1a	48	2295	2	4	TSeries-05312019-1217-036	1p_500	1	500	47	1	0.239402		1	0.239402	1
Scn1a	48	2295	2	4	TSeries-05312019-1217-036	1p_500	1	500	48	1	0.290078		1	0.290078	1
Scn1a	48	2295	2	4	TSeries-05312019-1217-036	1p_500	1	500	49	1	0.299023		1	0.299023	1
Scn1a	48	2295	2	4	TSeries-05312019-1217-037	1p_400	1	400	0	0			0
Scn1a	48	2295	2	4	TSeries-05312019-1217-037	1p_400	1	400	1	0			0
Scn1a	48	2295	2	4	TSeries-05312019-1217-037	1p_400	1	400	2	1	0.589512		1	0.589512	1
Scn1a	48	2295	2	4	TSeries-05312019-1217-037	1p_400	1	400	3	1	0.293093		1	0.293093	1
Scn1a	48	2295	2	4	TSeries-05312019-1217-037	1p_400	1	400	4	0			0
Scn1a	48	2295	2	4	TSeries-05312019-1217-037	1p_400	1	400	5	0			0
Scn1a	48	2295	2	4	TSeries-05312019-1217-037	1p_400	1	400	6	0			0
Scn1a	48	2295	2	4	TSeries-05312019-1217-037	1p_400	1	400	7	0			0
Scn1a	48	2295	2	4	TSeries-05312019-1217-037	1p_400	1	400	8	1	0.829373		1	0.829373	2
Scn1a	48	2295	2	4	TSeries-05312019-1217-037	1p_400	1	400	9	0			0
Scn1a	48	2295	2	4	TSeries-05312019-1217-037	1p_400	1	400	10	0			0
Scn1a	48	2295	2	4	TSeries-05312019-1217-037	1p_400	1	400	11	0			0
Scn1a	48	2295	2	4	TSeries-05312019-1217-037	1p_400	1	400	12	0			0
Scn1a	48	2295	2	4	TSeries-05312019-1217-037	1p_400	1	400	13	0			0
Scn1a	48	2295	2	4	TSeries-05312019-1217-037	1p_400	1	400	14	0			0
Scn1a	48	2295	2	4	TSeries-05312019-1217-037	1p_400	1	400	15	1	0.367697		1	0.367697	1
Scn1a	48	2295	2	4	TSeries-05312019-1217-037	1p_400	1	400	16	1	0.625131		1	0.625131	1
Scn1a	48	2295	2	4	TSeries-05312019-1217-037	1p_400	1	400	17	1	2.48428		1	2.48428	3
Scn1a	48	2295	2	4	TSeries-05312019-1217-037	1p_400	1	400	18	0			0
Scn1a	48	2295	2	4	TSeries-05312019-1217-037	1p_400	1	400	19	1	1.06386		1	1.06386	1
Scn1a	48	2295	2	4	TSeries-05312019-1217-037	1p_400	1	400	20	0			0
Scn1a	48	2295	2	4	TSeries-05312019-1217-037	1p_400	1	400	21	0			0
Scn1a	48	2295	2	4	TSeries-05312019-1217-037	1p_400	1	400	22	1	1.11977		1	1.11977	2
Scn1a	48	2295	2	4	TSeries-05312019-1217-037	1p_400	1	400	23	0			0
Scn1a	48	2295	2	4	TSeries-05312019-1217-037	1p_400	1	400	24	0			0
Scn1a	48	2295	2	4	TSeries-05312019-1217-037	1p_400	1	400	25	1	0.357488		1	0.357488	1
Scn1a	48	2295	2	4	TSeries-05312019-1217-037	1p_400	1	400	26	0			0
Scn1a	48	2295	2	4	TSeries-05312019-1217-037	1p_400	1	400	27	0			0
Scn1a	48	2295	2	4	TSeries-05312019-1217-037	1p_400	1	400	28	0			0
Scn1a	48	2295	2	4	TSeries-05312019-1217-037	1p_400	1	400	29	1	0.632568		1	0.632568	1
Scn1a	48	2295	2	4	TSeries-05312019-1217-037	1p_400	1	400	30	0			0
Scn1a	48	2295	2	4	TSeries-05312019-1217-037	1p_400	1	400	31	0			0
Scn1a	48	2295	2	4	TSeries-05312019-1217-037	1p_400	1	400	32	1	0.557005		1	0.557005	1
Scn1a	48	2295	2	4	TSeries-05312019-1217-037	1p_400	1	400	33	1	1.19112		1	1.19112	2
Scn1a	48	2295	2	4	TSeries-05312019-1217-037	1p_400	1	400	34	0			0
Scn1a	48	2295	2	4	TSeries-05312019-1217-037	1p_400	1	400	35	0			0
Scn1a	48	2295	2	4	TSeries-05312019-1217-037	1p_400	1	400	36	0			0
Scn1a	48	2295	2	4	TSeries-05312019-1217-037	1p_400	1	400	37	0			0
Scn1a	48	2295	2	4	TSeries-05312019-1217-037	1p_400	1	400	38	0			0
Scn1a	48	2295	2	4	TSeries-05312019-1217-037	1p_400	1	400	39	1	0.449555		1	0.449555	1
Scn1a	48	2295	2	4	TSeries-05312019-1217-037	1p_400	1	400	40	0			0
Scn1a	48	2295	2	4	TSeries-05312019-1217-037	1p_400	1	400	41	0			0
Scn1a	48	2295	2	4	TSeries-05312019-1217-037	1p_400	1	400	42	0			0
Scn1a	48	2295	2	4	TSeries-05312019-1217-037	1p_400	1	400	43	0			0
Scn1a	48	2295	2	4	TSeries-05312019-1217-037	1p_400	1	400	44	0			0
Scn1a	48	2295	2	4	TSeries-05312019-1217-037	1p_400	1	400	45	0			0
Scn1a	48	2295	2	4	TSeries-05312019-1217-037	1p_400	1	400	46	1	0.214848		1	0.214848	1
Scn1a	48	2295	2	4	TSeries-05312019-1217-037	1p_400	1	400	47	1	0.57157		1	0.57157	1
Scn1a	48	2295	2	4	TSeries-05312019-1217-037	1p_400	1	400	48	1	0.438171		1	0.438171	1
Scn1a	48	2295	2	4	TSeries-05312019-1217-037	1p_400	1	400	49	0			0
Scn1a	48	2295	2	4	TSeries-05312019-1217-038	1p_300	1	300	0	0			0
Scn1a	48	2295	2	4	TSeries-05312019-1217-038	1p_300	1	300	1	0			0
Scn1a	48	2295	2	4	TSeries-05312019-1217-038	1p_300	1	300	2	0			0
Scn1a	48	2295	2	4	TSeries-05312019-1217-038	1p_300	1	300	3	0			0
Scn1a	48	2295	2	4	TSeries-05312019-1217-038	1p_300	1	300	4	0			0
Scn1a	48	2295	2	4	TSeries-05312019-1217-038	1p_300	1	300	5	0			0
Scn1a	48	2295	2	4	TSeries-05312019-1217-038	1p_300	1	300	6	0			0
Scn1a	48	2295	2	4	TSeries-05312019-1217-038	1p_300	1	300	7	1	0.152327		1	0.152327	1
Scn1a	48	2295	2	4	TSeries-05312019-1217-038	1p_300	1	300	8	0			0
Scn1a	48	2295	2	4	TSeries-05312019-1217-038	1p_300	1	300	9	1	0.999562		1	0.999562	2
Scn1a	48	2295	2	4	TSeries-05312019-1217-038	1p_300	1	300	10	0			0
Scn1a	48	2295	2	4	TSeries-05312019-1217-038	1p_300	1	300	11	0			0
Scn1a	48	2295	2	4	TSeries-05312019-1217-038	1p_300	1	300	12	0			0
Scn1a	48	2295	2	4	TSeries-05312019-1217-038	1p_300	1	300	13	0			0
Scn1a	48	2295	2	4	TSeries-05312019-1217-038	1p_300	1	300	14	0			0
Scn1a	48	2295	2	4	TSeries-05312019-1217-038	1p_300	1	300	15	0			0
Scn1a	48	2295	2	4	TSeries-05312019-1217-038	1p_300	1	300	16	0			0
Scn1a	48	2295	2	4	TSeries-05312019-1217-038	1p_300	1	300	17	0			0
Scn1a	48	2295	2	4	TSeries-05312019-1217-038	1p_300	1	300	18	0			0
Scn1a	48	2295	2	4	TSeries-05312019-1217-038	1p_300	1	300	19	0			0
Scn1a	48	2295	2	4	TSeries-05312019-1217-038	1p_300	1	300	20	0			0
Scn1a	48	2295	2	4	TSeries-05312019-1217-038	1p_300	1	300	21	0			0
Scn1a	48	2295	2	4	TSeries-05312019-1217-038	1p_300	1	300	22	0			0
Scn1a	48	2295	2	4	TSeries-05312019-1217-038	1p_300	1	300	23	0			0
Scn1a	48	2295	2	4	TSeries-05312019-1217-038	1p_300	1	300	24	0			0
Scn1a	48	2295	2	4	TSeries-05312019-1217-038	1p_300	1	300	25	1	0.228303		1	0.228303	1
Scn1a	48	2295	2	4	TSeries-05312019-1217-038	1p_300	1	300	26	0			0
Scn1a	48	2295	2	4	TSeries-05312019-1217-038	1p_300	1	300	27	0			0
Scn1a	48	2295	2	4	TSeries-05312019-1217-038	1p_300	1	300	28	0			0
Scn1a	48	2295	2	4	TSeries-05312019-1217-038	1p_300	1	300	29	0			0
Scn1a	48	2295	2	4	TSeries-05312019-1217-038	1p_300	1	300	30	0			0
Scn1a	48	2295	2	4	TSeries-05312019-1217-038	1p_300	1	300	31	0			0
Scn1a	48	2295	2	4	TSeries-05312019-1217-038	1p_300	1	300	32	1	0.300132		1	0.300132	1
Scn1a	48	2295	2	4	TSeries-05312019-1217-038	1p_300	1	300	33	1	0.950068		1	0.950068	2
Scn1a	48	2295	2	4	TSeries-05312019-1217-038	1p_300	1	300	34	0			0
Scn1a	48	2295	2	4	TSeries-05312019-1217-038	1p_300	1	300	35	0			0
Scn1a	48	2295	2	4	TSeries-05312019-1217-038	1p_300	1	300	36	0			0
Scn1a	48	2295	2	4	TSeries-05312019-1217-038	1p_300	1	300	37	0			0
Scn1a	48	2295	2	4	TSeries-05312019-1217-038	1p_300	1	300	38	1	0.219309		1	0.219309	1
Scn1a	48	2295	2	4	TSeries-05312019-1217-038	1p_300	1	300	39	0			0
Scn1a	48	2295	2	4	TSeries-05312019-1217-038	1p_300	1	300	40	0			0
Scn1a	48	2295	2	4	TSeries-05312019-1217-038	1p_300	1	300	41	0			0
Scn1a	48	2295	2	4	TSeries-05312019-1217-038	1p_300	1	300	42	0			0
Scn1a	48	2295	2	4	TSeries-05312019-1217-038	1p_300	1	300	43	0			0
Scn1a	48	2295	2	4	TSeries-05312019-1217-038	1p_300	1	300	44	0			0
Scn1a	48	2295	2	4	TSeries-05312019-1217-038	1p_300	1	300	45	0			0
Scn1a	48	2295	2	4	TSeries-05312019-1217-038	1p_300	1	300	46	0			0
Scn1a	48	2295	2	4	TSeries-05312019-1217-038	1p_300	1	300	47	0			0
Scn1a	48	2295	2	4	TSeries-05312019-1217-038	1p_300	1	300	48	1	0.438301		1	0.438301	1
Scn1a	48	2295	2	4	TSeries-05312019-1217-038	1p_300	1	300	49	0			0
Scn1a	48	2295	2	4	TSeries-05312019-1217-039	1p_200	1	200	0	0			0
Scn1a	48	2295	2	4	TSeries-05312019-1217-039	1p_200	1	200	1	0			0
Scn1a	48	2295	2	4	TSeries-05312019-1217-039	1p_200	1	200	2	0			0
Scn1a	48	2295	2	4	TSeries-05312019-1217-039	1p_200	1	200	3	0			0
Scn1a	48	2295	2	4	TSeries-05312019-1217-039	1p_200	1	200	4	0			0
Scn1a	48	2295	2	4	TSeries-05312019-1217-039	1p_200	1	200	5	0			0
Scn1a	48	2295	2	4	TSeries-05312019-1217-039	1p_200	1	200	6	0			0
Scn1a	48	2295	2	4	TSeries-05312019-1217-039	1p_200	1	200	7	0			0
Scn1a	48	2295	2	4	TSeries-05312019-1217-039	1p_200	1	200	8	0			0
Scn1a	48	2295	2	4	TSeries-05312019-1217-039	1p_200	1	200	9	0			0
Scn1a	48	2295	2	4	TSeries-05312019-1217-039	1p_200	1	200	10	0			0
Scn1a	48	2295	2	4	TSeries-05312019-1217-039	1p_200	1	200	11	0			0
Scn1a	48	2295	2	4	TSeries-05312019-1217-039	1p_200	1	200	12	0			0
Scn1a	48	2295	2	4	TSeries-05312019-1217-039	1p_200	1	200	13	0			0
Scn1a	48	2295	2	4	TSeries-05312019-1217-039	1p_200	1	200	14	0			0
Scn1a	48	2295	2	4	TSeries-05312019-1217-039	1p_200	1	200	15	0			0
Scn1a	48	2295	2	4	TSeries-05312019-1217-039	1p_200	1	200	16	0			0
Scn1a	48	2295	2	4	TSeries-05312019-1217-039	1p_200	1	200	17	0			0
Scn1a	48	2295	2	4	TSeries-05312019-1217-039	1p_200	1	200	18	0			0
Scn1a	48	2295	2	4	TSeries-05312019-1217-039	1p_200	1	200	19	0			0
Scn1a	48	2295	2	4	TSeries-05312019-1217-039	1p_200	1	200	20	0			0
Scn1a	48	2295	2	4	TSeries-05312019-1217-039	1p_200	1	200	21	0			0
Scn1a	48	2295	2	4	TSeries-05312019-1217-039	1p_200	1	200	22	0			0
Scn1a	48	2295	2	4	TSeries-05312019-1217-039	1p_200	1	200	23	0			0
Scn1a	48	2295	2	4	TSeries-05312019-1217-039	1p_200	1	200	24	0			0
Scn1a	48	2295	2	4	TSeries-05312019-1217-039	1p_200	1	200	25	0			0
Scn1a	48	2295	2	4	TSeries-05312019-1217-039	1p_200	1	200	26	0			0
Scn1a	48	2295	2	4	TSeries-05312019-1217-039	1p_200	1	200	27	0			0
Scn1a	48	2295	2	4	TSeries-05312019-1217-039	1p_200	1	200	28	0			0
Scn1a	48	2295	2	4	TSeries-05312019-1217-039	1p_200	1	200	29	0			0
Scn1a	48	2295	2	4	TSeries-05312019-1217-039	1p_200	1	200	30	0			0
Scn1a	48	2295	2	4	TSeries-05312019-1217-039	1p_200	1	200	31	0			0
Scn1a	48	2295	2	4	TSeries-05312019-1217-039	1p_200	1	200	32	0			0
Scn1a	48	2295	2	4	TSeries-05312019-1217-039	1p_200	1	200	33	0			0
Scn1a	48	2295	2	4	TSeries-05312019-1217-039	1p_200	1	200	34	0			0
Scn1a	48	2295	2	4	TSeries-05312019-1217-039	1p_200	1	200	35	0			0
Scn1a	48	2295	2	4	TSeries-05312019-1217-039	1p_200	1	200	36	0			0
Scn1a	48	2295	2	4	TSeries-05312019-1217-039	1p_200	1	200	37	0			0
Scn1a	48	2295	2	4	TSeries-05312019-1217-039	1p_200	1	200	38	0			0
Scn1a	48	2295	2	4	TSeries-05312019-1217-039	1p_200	1	200	39	0			0
Scn1a	48	2295	2	4	TSeries-05312019-1217-039	1p_200	1	200	40	0			0
Scn1a	48	2295	2	4	TSeries-05312019-1217-039	1p_200	1	200	41	0			0
Scn1a	48	2295	2	4	TSeries-05312019-1217-039	1p_200	1	200	42	0			0
Scn1a	48	2295	2	4	TSeries-05312019-1217-039	1p_200	1	200	43	0			0
Scn1a	48	2295	2	4	TSeries-05312019-1217-039	1p_200	1	200	44	1	1.37916		1	1.37916	2
Scn1a	48	2295	2	4	TSeries-05312019-1217-039	1p_200	1	200	45	0			0
Scn1a	48	2295	2	4	TSeries-05312019-1217-039	1p_200	1	200	46	1	0.206176		1	0.206176	1
Scn1a	48	2295	2	4	TSeries-05312019-1217-039	1p_200	1	200	47	0			0
Scn1a	48	2295	2	4	TSeries-05312019-1217-039	1p_200	1	200	48	0			0
Scn1a	48	2295	2	4	TSeries-05312019-1217-039	1p_200	1	200	49	0			0
Scn1a	48	2295	2	4	TSeries-05312019-1217-040	1p_100	1	100	0	0			0
Scn1a	48	2295	2	4	TSeries-05312019-1217-040	1p_100	1	100	1	0			0
Scn1a	48	2295	2	4	TSeries-05312019-1217-040	1p_100	1	100	2	0			0
Scn1a	48	2295	2	4	TSeries-05312019-1217-040	1p_100	1	100	3	0			0
Scn1a	48	2295	2	4	TSeries-05312019-1217-040	1p_100	1	100	4	0			0
Scn1a	48	2295	2	4	TSeries-05312019-1217-040	1p_100	1	100	5	0			0
Scn1a	48	2295	2	4	TSeries-05312019-1217-040	1p_100	1	100	6	0			0
Scn1a	48	2295	2	4	TSeries-05312019-1217-040	1p_100	1	100	7	0			0
Scn1a	48	2295	2	4	TSeries-05312019-1217-040	1p_100	1	100	8	0			0
Scn1a	48	2295	2	4	TSeries-05312019-1217-040	1p_100	1	100	9	0			0
Scn1a	48	2295	2	4	TSeries-05312019-1217-040	1p_100	1	100	10	0			0
Scn1a	48	2295	2	4	TSeries-05312019-1217-040	1p_100	1	100	11	0			0
Scn1a	48	2295	2	4	TSeries-05312019-1217-040	1p_100	1	100	12	0			0
Scn1a	48	2295	2	4	TSeries-05312019-1217-040	1p_100	1	100	13	0			0
Scn1a	48	2295	2	4	TSeries-05312019-1217-040	1p_100	1	100	14	0			0
Scn1a	48	2295	2	4	TSeries-05312019-1217-040	1p_100	1	100	15	0			0
Scn1a	48	2295	2	4	TSeries-05312019-1217-040	1p_100	1	100	16	0			0
Scn1a	48	2295	2	4	TSeries-05312019-1217-040	1p_100	1	100	17	0			0
Scn1a	48	2295	2	4	TSeries-05312019-1217-040	1p_100	1	100	18	0			0
Scn1a	48	2295	2	4	TSeries-05312019-1217-040	1p_100	1	100	19	0			0
Scn1a	48	2295	2	4	TSeries-05312019-1217-040	1p_100	1	100	20	0			0
Scn1a	48	2295	2	4	TSeries-05312019-1217-040	1p_100	1	100	21	0			0
Scn1a	48	2295	2	4	TSeries-05312019-1217-040	1p_100	1	100	22	0			0
Scn1a	48	2295	2	4	TSeries-05312019-1217-040	1p_100	1	100	23	0			0
Scn1a	48	2295	2	4	TSeries-05312019-1217-040	1p_100	1	100	24	0			0
Scn1a	48	2295	2	4	TSeries-05312019-1217-040	1p_100	1	100	25	0			0
Scn1a	48	2295	2	4	TSeries-05312019-1217-040	1p_100	1	100	26	0			0
Scn1a	48	2295	2	4	TSeries-05312019-1217-040	1p_100	1	100	27	0			0
Scn1a	48	2295	2	4	TSeries-05312019-1217-040	1p_100	1	100	28	0			0
Scn1a	48	2295	2	4	TSeries-05312019-1217-040	1p_100	1	100	29	0			0
Scn1a	48	2295	2	4	TSeries-05312019-1217-040	1p_100	1	100	30	0			0
Scn1a	48	2295	2	4	TSeries-05312019-1217-040	1p_100	1	100	31	0			0
Scn1a	48	2295	2	4	TSeries-05312019-1217-040	1p_100	1	100	32	0			0
Scn1a	48	2295	2	4	TSeries-05312019-1217-040	1p_100	1	100	33	0			0
Scn1a	48	2295	2	4	TSeries-05312019-1217-040	1p_100	1	100	34	0			0
Scn1a	48	2295	2	4	TSeries-05312019-1217-040	1p_100	1	100	35	0			0
Scn1a	48	2295	2	4	TSeries-05312019-1217-040	1p_100	1	100	36	0			0
Scn1a	48	2295	2	4	TSeries-05312019-1217-040	1p_100	1	100	37	0			0
Scn1a	48	2295	2	4	TSeries-05312019-1217-040	1p_100	1	100	38	0			0
Scn1a	48	2295	2	4	TSeries-05312019-1217-040	1p_100	1	100	39	0			0
Scn1a	48	2295	2	4	TSeries-05312019-1217-040	1p_100	1	100	40	0			0
Scn1a	48	2295	2	4	TSeries-05312019-1217-040	1p_100	1	100	41	0			0
Scn1a	48	2295	2	4	TSeries-05312019-1217-040	1p_100	1	100	42	0			0
Scn1a	48	2295	2	4	TSeries-05312019-1217-040	1p_100	1	100	43	0			0
Scn1a	48	2295	2	4	TSeries-05312019-1217-040	1p_100	1	100	44	0			0
Scn1a	48	2295	2	4	TSeries-05312019-1217-040	1p_100	1	100	45	0			0
Scn1a	48	2295	2	4	TSeries-05312019-1217-040	1p_100	1	100	46	0			0
Scn1a	48	2295	2	4	TSeries-05312019-1217-040	1p_100	1	100	47	0			0
Scn1a	48	2295	2	4	TSeries-05312019-1217-040	1p_100	1	100	48	0			0
Scn1a	48	2295	2	4	TSeries-05312019-1217-040	1p_100	1	100	49	0			0
Scn1a	48	2295	3	6	TSeries-05312019-1217-051	4p_500	4	500	0	1	1.99894	121.908	1	1.99894	2
Scn1a	48	2295	3	6	TSeries-05312019-1217-051	4p_500	4	500	1	0		98.5615	0
Scn1a	48	2295	3	6	TSeries-05312019-1217-051	4p_500	4	500	2	0		81.326	0
Scn1a	48	2295	3	6	TSeries-05312019-1217-051	4p_500	4	500	3	1	1.29449	106.992	1	1.29449	2
Scn1a	48	2295	3	6	TSeries-05312019-1217-051	4p_500	4	500	4	0		131.865	0
Scn1a	48	2295	3	6	TSeries-05312019-1217-051	4p_500	4	500	5	0		119.811	0
Scn1a	48	2295	3	6	TSeries-05312019-1217-051	4p_500	4	500	6	0		131.038	0
Scn1a	48	2295	3	6	TSeries-05312019-1217-051	4p_500	4	500	7	0		141.564	0
Scn1a	48	2295	3	6	TSeries-05312019-1217-051	4p_500	4	500	8	0		172.12	0
Scn1a	48	2295	3	6	TSeries-05312019-1217-051	4p_500	4	500	9	0		167.771	0
Scn1a	48	2295	3	6	TSeries-05312019-1217-051	4p_500	4	500	10	0		146.174	0
Scn1a	48	2295	3	6	TSeries-05312019-1217-051	4p_500	4	500	11	0		134.032	0
Scn1a	48	2295	3	6	TSeries-05312019-1217-051	4p_500	4	500	12	0		118.031	0
Scn1a	48	2295	3	6	TSeries-05312019-1217-051	4p_500	4	500	13	0		109.754	0
Scn1a	48	2295	3	6	TSeries-05312019-1217-051	4p_500	4	500	14	0		88.4051	0
Scn1a	48	2295	3	6	TSeries-05312019-1217-051	4p_500	4	500	15	0		73.2243	0
Scn1a	48	2295	3	6	TSeries-05312019-1217-051	4p_500	4	500	16	0		69.0335	0
Scn1a	48	2295	3	6	TSeries-05312019-1217-051	4p_500	4	500	17	0		78.2043	0
Scn1a	48	2295	3	6	TSeries-05312019-1217-051	4p_500	4	500	18	1	0.202345	65.7303	1	0.202345	1
Scn1a	48	2295	3	6	TSeries-05312019-1217-051	4p_500	4	500	19	0		45.7014	0
Scn1a	48	2295	3	6	TSeries-05312019-1217-051	4p_500	4	500	20	0		103.15	0
Scn1a	48	2295	3	6	TSeries-05312019-1217-051	4p_500	4	500	21	0		111.8	0
Scn1a	48	2295	3	6	TSeries-05312019-1217-051	4p_500	4	500	22	0		139.775	0
Scn1a	48	2295	3	6	TSeries-05312019-1217-051	4p_500	4	500	23	0		204.602	0
Scn1a	48	2295	3	6	TSeries-05312019-1217-051	4p_500	4	500	24	0		152.795	0
Scn1a	48	2295	3	6	TSeries-05312019-1217-051	4p_500	4	500	25	0		136.171	0
Scn1a	48	2295	3	6	TSeries-05312019-1217-051	4p_500	4	500	26	0		191.254	0
Scn1a	48	2295	3	6	TSeries-05312019-1217-051	4p_500	4	500	27	0		186.137	0
Scn1a	48	2295	3	6	TSeries-05312019-1217-051	4p_500	4	500	28	0		167.948	0
Scn1a	48	2295	3	6	TSeries-05312019-1217-051	4p_500	4	500	29	0		155.506	0
Scn1a	48	2295	3	6	TSeries-05312019-1217-051	4p_500	4	500	30	0		137.552	0
Scn1a	48	2295	3	6	TSeries-05312019-1217-051	4p_500	4	500	31	0		121.722	0
Scn1a	48	2295	3	6	TSeries-05312019-1217-051	4p_500	4	500	32	0		139.318	0
Scn1a	48	2295	3	6	TSeries-05312019-1217-051	4p_500	4	500	33	0		168.65	0
Scn1a	48	2295	3	6	TSeries-05312019-1217-051	4p_500	4	500	34	0		183.767	0
Scn1a	48	2295	3	6	TSeries-05312019-1217-051	4p_500	4	500	35	0		212.302	0
Scn1a	48	2295	3	6	TSeries-05312019-1217-051	4p_500	4	500	36	0		191.396	0
Scn1a	48	2295	3	6	TSeries-05312019-1217-051	4p_500	4	500	37	0		169.429	0
Scn1a	48	2295	3	6	TSeries-05312019-1217-051	4p_500	4	500	38	0		174.309	0
Scn1a	48	2295	3	6	TSeries-05312019-1217-051	4p_500	4	500	39	1	0.705753	183.15	1	0.705753	2
Scn1a	48	2295	3	6	TSeries-05312019-1217-051	4p_500	4	500	40	0		167.973	0
Scn1a	48	2295	3	6	TSeries-05312019-1217-051	4p_500	4	500	41	0		154.491	0
Scn1a	48	2295	3	6	TSeries-05312019-1217-051	4p_500	4	500	42	1	1.70293	148.364	1	1.70293	2
Scn1a	48	2295	3	6	TSeries-05312019-1217-051	4p_500	4	500	43	1	0.249377	128.889	1	0.249377	1
Scn1a	48	2295	3	6	TSeries-05312019-1217-051	4p_500	4	500	44	0		111.39	0
Scn1a	48	2295	3	6	TSeries-05312019-1217-051	4p_500	4	500	45	0		83.5575	0
Scn1a	48	2295	3	6	TSeries-05312019-1217-051	4p_500	4	500	46	0		61.3978	0
Scn1a	48	2295	3	6	TSeries-05312019-1217-051	4p_500	4	500	47	0		38.7826	0
Scn1a	48	2295	3	6	TSeries-05312019-1217-051	4p_500	4	500	48	0		75.6591	0
Scn1a	48	2295	3	6	TSeries-05312019-1217-051	4p_500	4	500	49	0		53.4684	0
Scn1a	48	2295	3	6	TSeries-05312019-1217-051	4p_500	4	500	50	0		131.822	0
Scn1a	48	2295	3	6	TSeries-05312019-1217-051	4p_500	4	500	51	1	0.244638	156.864	1	0.244638	1
Scn1a	48	2295	3	6	TSeries-05312019-1217-051	4p_500	4	500	52	0		139.243	0
Scn1a	48	2295	3	6	TSeries-05312019-1217-051	4p_500	4	500	53	1	0.405346	63.8609	1	0.405346	1
Scn1a	48	2295	3	6	TSeries-05312019-1217-052	4p_400	4	400	0	0			0
Scn1a	48	2295	3	6	TSeries-05312019-1217-052	4p_400	4	400	1	0			0
Scn1a	48	2295	3	6	TSeries-05312019-1217-052	4p_400	4	400	2	0			0
Scn1a	48	2295	3	6	TSeries-05312019-1217-052	4p_400	4	400	3	0			0
Scn1a	48	2295	3	6	TSeries-05312019-1217-052	4p_400	4	400	4	0			0
Scn1a	48	2295	3	6	TSeries-05312019-1217-052	4p_400	4	400	5	0			0
Scn1a	48	2295	3	6	TSeries-05312019-1217-052	4p_400	4	400	6	0			0
Scn1a	48	2295	3	6	TSeries-05312019-1217-052	4p_400	4	400	7	0			0
Scn1a	48	2295	3	6	TSeries-05312019-1217-052	4p_400	4	400	8	0			0
Scn1a	48	2295	3	6	TSeries-05312019-1217-052	4p_400	4	400	9	0			0
Scn1a	48	2295	3	6	TSeries-05312019-1217-052	4p_400	4	400	10	0			0
Scn1a	48	2295	3	6	TSeries-05312019-1217-052	4p_400	4	400	11	0			0
Scn1a	48	2295	3	6	TSeries-05312019-1217-052	4p_400	4	400	12	0			0
Scn1a	48	2295	3	6	TSeries-05312019-1217-052	4p_400	4	400	13	0			0
Scn1a	48	2295	3	6	TSeries-05312019-1217-052	4p_400	4	400	14	0			0
Scn1a	48	2295	3	6	TSeries-05312019-1217-052	4p_400	4	400	15	0			0
Scn1a	48	2295	3	6	TSeries-05312019-1217-052	4p_400	4	400	16	0			0
Scn1a	48	2295	3	6	TSeries-05312019-1217-052	4p_400	4	400	17	0			0
Scn1a	48	2295	3	6	TSeries-05312019-1217-052	4p_400	4	400	18	0			0
Scn1a	48	2295	3	6	TSeries-05312019-1217-052	4p_400	4	400	19	0			0
Scn1a	48	2295	3	6	TSeries-05312019-1217-052	4p_400	4	400	20	0			0
Scn1a	48	2295	3	6	TSeries-05312019-1217-052	4p_400	4	400	21	0			0
Scn1a	48	2295	3	6	TSeries-05312019-1217-052	4p_400	4	400	22	0			0
Scn1a	48	2295	3	6	TSeries-05312019-1217-052	4p_400	4	400	23	0			0
Scn1a	48	2295	3	6	TSeries-05312019-1217-052	4p_400	4	400	24	0			0
Scn1a	48	2295	3	6	TSeries-05312019-1217-052	4p_400	4	400	25	0			0
Scn1a	48	2295	3	6	TSeries-05312019-1217-052	4p_400	4	400	26	0			0
Scn1a	48	2295	3	6	TSeries-05312019-1217-052	4p_400	4	400	27	0			0
Scn1a	48	2295	3	6	TSeries-05312019-1217-052	4p_400	4	400	28	0			0
Scn1a	48	2295	3	6	TSeries-05312019-1217-052	4p_400	4	400	29	0			0
Scn1a	48	2295	3	6	TSeries-05312019-1217-052	4p_400	4	400	30	0			0
Scn1a	48	2295	3	6	TSeries-05312019-1217-052	4p_400	4	400	31	0			0
Scn1a	48	2295	3	6	TSeries-05312019-1217-052	4p_400	4	400	32	0			0
Scn1a	48	2295	3	6	TSeries-05312019-1217-052	4p_400	4	400	33	0			0
Scn1a	48	2295	3	6	TSeries-05312019-1217-052	4p_400	4	400	34	0			0
Scn1a	48	2295	3	6	TSeries-05312019-1217-052	4p_400	4	400	35	0			0
Scn1a	48	2295	3	6	TSeries-05312019-1217-052	4p_400	4	400	36	0			0
Scn1a	48	2295	3	6	TSeries-05312019-1217-052	4p_400	4	400	37	0			0
Scn1a	48	2295	3	6	TSeries-05312019-1217-052	4p_400	4	400	38	0			0
Scn1a	48	2295	3	6	TSeries-05312019-1217-052	4p_400	4	400	39	0			0
Scn1a	48	2295	3	6	TSeries-05312019-1217-052	4p_400	4	400	40	0			0
Scn1a	48	2295	3	6	TSeries-05312019-1217-052	4p_400	4	400	41	0			0
Scn1a	48	2295	3	6	TSeries-05312019-1217-052	4p_400	4	400	42	0			0
Scn1a	48	2295	3	6	TSeries-05312019-1217-052	4p_400	4	400	43	0			0
Scn1a	48	2295	3	6	TSeries-05312019-1217-052	4p_400	4	400	44	0			0
Scn1a	48	2295	3	6	TSeries-05312019-1217-052	4p_400	4	400	45	0			0
Scn1a	48	2295	3	6	TSeries-05312019-1217-052	4p_400	4	400	46	0			0
Scn1a	48	2295	3	6	TSeries-05312019-1217-052	4p_400	4	400	47	0			0
Scn1a	48	2295	3	6	TSeries-05312019-1217-052	4p_400	4	400	48	0			0
Scn1a	48	2295	3	6	TSeries-05312019-1217-052	4p_400	4	400	49	0			0
Scn1a	48	2295	3	6	TSeries-05312019-1217-052	4p_400	4	400	50	0			0
Scn1a	48	2295	3	6	TSeries-05312019-1217-052	4p_400	4	400	51	1	0.158119		1	0.158119	1
Scn1a	48	2295	3	6	TSeries-05312019-1217-052	4p_400	4	400	52	0			0
Scn1a	48	2295	3	6	TSeries-05312019-1217-052	4p_400	4	400	53	1	0.518926		1	0.518926	2
Scn1a	48	2295	3	6	TSeries-05312019-1217-053	4p_300	4	300	0	0			0
Scn1a	48	2295	3	6	TSeries-05312019-1217-053	4p_300	4	300	1	0			0
Scn1a	48	2295	3	6	TSeries-05312019-1217-053	4p_300	4	300	2	0			0
Scn1a	48	2295	3	6	TSeries-05312019-1217-053	4p_300	4	300	3	0			0
Scn1a	48	2295	3	6	TSeries-05312019-1217-053	4p_300	4	300	4	0			0
Scn1a	48	2295	3	6	TSeries-05312019-1217-053	4p_300	4	300	5	0			0
Scn1a	48	2295	3	6	TSeries-05312019-1217-053	4p_300	4	300	6	0			0
Scn1a	48	2295	3	6	TSeries-05312019-1217-053	4p_300	4	300	7	0			0
Scn1a	48	2295	3	6	TSeries-05312019-1217-053	4p_300	4	300	8	0			0
Scn1a	48	2295	3	6	TSeries-05312019-1217-053	4p_300	4	300	9	0			0
Scn1a	48	2295	3	6	TSeries-05312019-1217-053	4p_300	4	300	10	0			0
Scn1a	48	2295	3	6	TSeries-05312019-1217-053	4p_300	4	300	11	0			0
Scn1a	48	2295	3	6	TSeries-05312019-1217-053	4p_300	4	300	12	0			0
Scn1a	48	2295	3	6	TSeries-05312019-1217-053	4p_300	4	300	13	0			0
Scn1a	48	2295	3	6	TSeries-05312019-1217-053	4p_300	4	300	14	0			0
Scn1a	48	2295	3	6	TSeries-05312019-1217-053	4p_300	4	300	15	0			0
Scn1a	48	2295	3	6	TSeries-05312019-1217-053	4p_300	4	300	16	0			0
Scn1a	48	2295	3	6	TSeries-05312019-1217-053	4p_300	4	300	17	0			0
Scn1a	48	2295	3	6	TSeries-05312019-1217-053	4p_300	4	300	18	0			0
Scn1a	48	2295	3	6	TSeries-05312019-1217-053	4p_300	4	300	19	0			0
Scn1a	48	2295	3	6	TSeries-05312019-1217-053	4p_300	4	300	20	0			0
Scn1a	48	2295	3	6	TSeries-05312019-1217-053	4p_300	4	300	21	0			0
Scn1a	48	2295	3	6	TSeries-05312019-1217-053	4p_300	4	300	22	0			0
Scn1a	48	2295	3	6	TSeries-05312019-1217-053	4p_300	4	300	23	0			0
Scn1a	48	2295	3	6	TSeries-05312019-1217-053	4p_300	4	300	24	0			0
Scn1a	48	2295	3	6	TSeries-05312019-1217-053	4p_300	4	300	25	0			0
Scn1a	48	2295	3	6	TSeries-05312019-1217-053	4p_300	4	300	26	0			0
Scn1a	48	2295	3	6	TSeries-05312019-1217-053	4p_300	4	300	27	0			0
Scn1a	48	2295	3	6	TSeries-05312019-1217-053	4p_300	4	300	28	0			0
Scn1a	48	2295	3	6	TSeries-05312019-1217-053	4p_300	4	300	29	0			0
Scn1a	48	2295	3	6	TSeries-05312019-1217-053	4p_300	4	300	30	0			0
Scn1a	48	2295	3	6	TSeries-05312019-1217-053	4p_300	4	300	31	0			0
Scn1a	48	2295	3	6	TSeries-05312019-1217-053	4p_300	4	300	32	0			0
Scn1a	48	2295	3	6	TSeries-05312019-1217-053	4p_300	4	300	33	0			0
Scn1a	48	2295	3	6	TSeries-05312019-1217-053	4p_300	4	300	34	0			0
Scn1a	48	2295	3	6	TSeries-05312019-1217-053	4p_300	4	300	35	0			0
Scn1a	48	2295	3	6	TSeries-05312019-1217-053	4p_300	4	300	36	0			0
Scn1a	48	2295	3	6	TSeries-05312019-1217-053	4p_300	4	300	37	0			0
Scn1a	48	2295	3	6	TSeries-05312019-1217-053	4p_300	4	300	38	0			0
Scn1a	48	2295	3	6	TSeries-05312019-1217-053	4p_300	4	300	39	0			0
Scn1a	48	2295	3	6	TSeries-05312019-1217-053	4p_300	4	300	40	0			0
Scn1a	48	2295	3	6	TSeries-05312019-1217-053	4p_300	4	300	41	0			0
Scn1a	48	2295	3	6	TSeries-05312019-1217-053	4p_300	4	300	42	0			0
Scn1a	48	2295	3	6	TSeries-05312019-1217-053	4p_300	4	300	43	0			0
Scn1a	48	2295	3	6	TSeries-05312019-1217-053	4p_300	4	300	44	0			0
Scn1a	48	2295	3	6	TSeries-05312019-1217-053	4p_300	4	300	45	0			0
Scn1a	48	2295	3	6	TSeries-05312019-1217-053	4p_300	4	300	46	0			0
Scn1a	48	2295	3	6	TSeries-05312019-1217-053	4p_300	4	300	47	0			0
Scn1a	48	2295	3	6	TSeries-05312019-1217-053	4p_300	4	300	48	0			0
Scn1a	48	2295	3	6	TSeries-05312019-1217-053	4p_300	4	300	49	0			0
Scn1a	48	2295	3	6	TSeries-05312019-1217-053	4p_300	4	300	50	0			0
Scn1a	48	2295	3	6	TSeries-05312019-1217-053	4p_300	4	300	51	0			0
Scn1a	48	2295	3	6	TSeries-05312019-1217-053	4p_300	4	300	52	0			0
Scn1a	48	2295	3	6	TSeries-05312019-1217-053	4p_300	4	300	53	0			0
Scn1a	48	2295	3	6	TSeries-05312019-1217-054	4p_200	4	200	0	0			0
Scn1a	48	2295	3	6	TSeries-05312019-1217-054	4p_200	4	200	1	0			0
Scn1a	48	2295	3	6	TSeries-05312019-1217-054	4p_200	4	200	2	0			0
Scn1a	48	2295	3	6	TSeries-05312019-1217-054	4p_200	4	200	3	0			0
Scn1a	48	2295	3	6	TSeries-05312019-1217-054	4p_200	4	200	4	0			0
Scn1a	48	2295	3	6	TSeries-05312019-1217-054	4p_200	4	200	5	0			0
Scn1a	48	2295	3	6	TSeries-05312019-1217-054	4p_200	4	200	6	0			0
Scn1a	48	2295	3	6	TSeries-05312019-1217-054	4p_200	4	200	7	0			0
Scn1a	48	2295	3	6	TSeries-05312019-1217-054	4p_200	4	200	8	0			0
Scn1a	48	2295	3	6	TSeries-05312019-1217-054	4p_200	4	200	9	0			0
Scn1a	48	2295	3	6	TSeries-05312019-1217-054	4p_200	4	200	10	0			0
Scn1a	48	2295	3	6	TSeries-05312019-1217-054	4p_200	4	200	11	0			0
Scn1a	48	2295	3	6	TSeries-05312019-1217-054	4p_200	4	200	12	0			0
Scn1a	48	2295	3	6	TSeries-05312019-1217-054	4p_200	4	200	13	0			0
Scn1a	48	2295	3	6	TSeries-05312019-1217-054	4p_200	4	200	14	0			0
Scn1a	48	2295	3	6	TSeries-05312019-1217-054	4p_200	4	200	15	0			0
Scn1a	48	2295	3	6	TSeries-05312019-1217-054	4p_200	4	200	16	0			0
Scn1a	48	2295	3	6	TSeries-05312019-1217-054	4p_200	4	200	17	0			0
Scn1a	48	2295	3	6	TSeries-05312019-1217-054	4p_200	4	200	18	0			0
Scn1a	48	2295	3	6	TSeries-05312019-1217-054	4p_200	4	200	19	0			0
Scn1a	48	2295	3	6	TSeries-05312019-1217-054	4p_200	4	200	20	0			0
Scn1a	48	2295	3	6	TSeries-05312019-1217-054	4p_200	4	200	21	0			0
Scn1a	48	2295	3	6	TSeries-05312019-1217-054	4p_200	4	200	22	0			0
Scn1a	48	2295	3	6	TSeries-05312019-1217-054	4p_200	4	200	23	0			0
Scn1a	48	2295	3	6	TSeries-05312019-1217-054	4p_200	4	200	24	0			0
Scn1a	48	2295	3	6	TSeries-05312019-1217-054	4p_200	4	200	25	0			0
Scn1a	48	2295	3	6	TSeries-05312019-1217-054	4p_200	4	200	26	0			0
Scn1a	48	2295	3	6	TSeries-05312019-1217-054	4p_200	4	200	27	0			0
Scn1a	48	2295	3	6	TSeries-05312019-1217-054	4p_200	4	200	28	0			0
Scn1a	48	2295	3	6	TSeries-05312019-1217-054	4p_200	4	200	29	0			0
Scn1a	48	2295	3	6	TSeries-05312019-1217-054	4p_200	4	200	30	0			0
Scn1a	48	2295	3	6	TSeries-05312019-1217-054	4p_200	4	200	31	0			0
Scn1a	48	2295	3	6	TSeries-05312019-1217-054	4p_200	4	200	32	0			0
Scn1a	48	2295	3	6	TSeries-05312019-1217-054	4p_200	4	200	33	0			0
Scn1a	48	2295	3	6	TSeries-05312019-1217-054	4p_200	4	200	34	0			0
Scn1a	48	2295	3	6	TSeries-05312019-1217-054	4p_200	4	200	35	0			0
Scn1a	48	2295	3	6	TSeries-05312019-1217-054	4p_200	4	200	36	0			0
Scn1a	48	2295	3	6	TSeries-05312019-1217-054	4p_200	4	200	37	0			0
Scn1a	48	2295	3	6	TSeries-05312019-1217-054	4p_200	4	200	38	0			0
Scn1a	48	2295	3	6	TSeries-05312019-1217-054	4p_200	4	200	39	0			0
Scn1a	48	2295	3	6	TSeries-05312019-1217-054	4p_200	4	200	40	0			0
Scn1a	48	2295	3	6	TSeries-05312019-1217-054	4p_200	4	200	41	0			0
Scn1a	48	2295	3	6	TSeries-05312019-1217-054	4p_200	4	200	42	0			0
Scn1a	48	2295	3	6	TSeries-05312019-1217-054	4p_200	4	200	43	0			0
Scn1a	48	2295	3	6	TSeries-05312019-1217-054	4p_200	4	200	44	0			0
Scn1a	48	2295	3	6	TSeries-05312019-1217-054	4p_200	4	200	45	0			0
Scn1a	48	2295	3	6	TSeries-05312019-1217-054	4p_200	4	200	46	0			0
Scn1a	48	2295	3	6	TSeries-05312019-1217-054	4p_200	4	200	47	0			0
Scn1a	48	2295	3	6	TSeries-05312019-1217-054	4p_200	4	200	48	0			0
Scn1a	48	2295	3	6	TSeries-05312019-1217-054	4p_200	4	200	49	0			0
Scn1a	48	2295	3	6	TSeries-05312019-1217-054	4p_200	4	200	50	0			0
Scn1a	48	2295	3	6	TSeries-05312019-1217-054	4p_200	4	200	51	0			0
Scn1a	48	2295	3	6	TSeries-05312019-1217-054	4p_200	4	200	52	0			0
Scn1a	48	2295	3	6	TSeries-05312019-1217-054	4p_200	4	200	53	0			0
Scn1a	48	2295	3	6	TSeries-05312019-1217-055	4p_100	4	100	0	0			0
Scn1a	48	2295	3	6	TSeries-05312019-1217-055	4p_100	4	100	1	0			0
Scn1a	48	2295	3	6	TSeries-05312019-1217-055	4p_100	4	100	2	0			0
Scn1a	48	2295	3	6	TSeries-05312019-1217-055	4p_100	4	100	3	0			0
Scn1a	48	2295	3	6	TSeries-05312019-1217-055	4p_100	4	100	4	0			0
Scn1a	48	2295	3	6	TSeries-05312019-1217-055	4p_100	4	100	5	0			0
Scn1a	48	2295	3	6	TSeries-05312019-1217-055	4p_100	4	100	6	0			0
Scn1a	48	2295	3	6	TSeries-05312019-1217-055	4p_100	4	100	7	0			0
Scn1a	48	2295	3	6	TSeries-05312019-1217-055	4p_100	4	100	8	0			0
Scn1a	48	2295	3	6	TSeries-05312019-1217-055	4p_100	4	100	9	0			0
Scn1a	48	2295	3	6	TSeries-05312019-1217-055	4p_100	4	100	10	0			0
Scn1a	48	2295	3	6	TSeries-05312019-1217-055	4p_100	4	100	11	0			0
Scn1a	48	2295	3	6	TSeries-05312019-1217-055	4p_100	4	100	12	0			0
Scn1a	48	2295	3	6	TSeries-05312019-1217-055	4p_100	4	100	13	0			0
Scn1a	48	2295	3	6	TSeries-05312019-1217-055	4p_100	4	100	14	0			0
Scn1a	48	2295	3	6	TSeries-05312019-1217-055	4p_100	4	100	15	0			0
Scn1a	48	2295	3	6	TSeries-05312019-1217-055	4p_100	4	100	16	0			0
Scn1a	48	2295	3	6	TSeries-05312019-1217-055	4p_100	4	100	17	0			0
Scn1a	48	2295	3	6	TSeries-05312019-1217-055	4p_100	4	100	18	0			0
Scn1a	48	2295	3	6	TSeries-05312019-1217-055	4p_100	4	100	19	0			0
Scn1a	48	2295	3	6	TSeries-05312019-1217-055	4p_100	4	100	20	0			0
Scn1a	48	2295	3	6	TSeries-05312019-1217-055	4p_100	4	100	21	0			0
Scn1a	48	2295	3	6	TSeries-05312019-1217-055	4p_100	4	100	22	0			0
Scn1a	48	2295	3	6	TSeries-05312019-1217-055	4p_100	4	100	23	0			0
Scn1a	48	2295	3	6	TSeries-05312019-1217-055	4p_100	4	100	24	0			0
Scn1a	48	2295	3	6	TSeries-05312019-1217-055	4p_100	4	100	25	0			0
Scn1a	48	2295	3	6	TSeries-05312019-1217-055	4p_100	4	100	26	0			0
Scn1a	48	2295	3	6	TSeries-05312019-1217-055	4p_100	4	100	27	0			0
Scn1a	48	2295	3	6	TSeries-05312019-1217-055	4p_100	4	100	28	0			0
Scn1a	48	2295	3	6	TSeries-05312019-1217-055	4p_100	4	100	29	0			0
Scn1a	48	2295	3	6	TSeries-05312019-1217-055	4p_100	4	100	30	0			0
Scn1a	48	2295	3	6	TSeries-05312019-1217-055	4p_100	4	100	31	0			0
Scn1a	48	2295	3	6	TSeries-05312019-1217-055	4p_100	4	100	32	0			0
Scn1a	48	2295	3	6	TSeries-05312019-1217-055	4p_100	4	100	33	0			0
Scn1a	48	2295	3	6	TSeries-05312019-1217-055	4p_100	4	100	34	0			0
Scn1a	48	2295	3	6	TSeries-05312019-1217-055	4p_100	4	100	35	0			0
Scn1a	48	2295	3	6	TSeries-05312019-1217-055	4p_100	4	100	36	0			0
Scn1a	48	2295	3	6	TSeries-05312019-1217-055	4p_100	4	100	37	0			0
Scn1a	48	2295	3	6	TSeries-05312019-1217-055	4p_100	4	100	38	0			0
Scn1a	48	2295	3	6	TSeries-05312019-1217-055	4p_100	4	100	39	0			0
Scn1a	48	2295	3	6	TSeries-05312019-1217-055	4p_100	4	100	40	0			0
Scn1a	48	2295	3	6	TSeries-05312019-1217-055	4p_100	4	100	41	0			0
Scn1a	48	2295	3	6	TSeries-05312019-1217-055	4p_100	4	100	42	0			0
Scn1a	48	2295	3	6	TSeries-05312019-1217-055	4p_100	4	100	43	0			0
Scn1a	48	2295	3	6	TSeries-05312019-1217-055	4p_100	4	100	44	0			0
Scn1a	48	2295	3	6	TSeries-05312019-1217-055	4p_100	4	100	45	0			0
Scn1a	48	2295	3	6	TSeries-05312019-1217-055	4p_100	4	100	46	0			0
Scn1a	48	2295	3	6	TSeries-05312019-1217-055	4p_100	4	100	47	0			0
Scn1a	48	2295	3	6	TSeries-05312019-1217-055	4p_100	4	100	48	0			0
Scn1a	48	2295	3	6	TSeries-05312019-1217-055	4p_100	4	100	49	0			0
Scn1a	48	2295	3	6	TSeries-05312019-1217-055	4p_100	4	100	50	0			0
Scn1a	48	2295	3	6	TSeries-05312019-1217-055	4p_100	4	100	51	0			0
Scn1a	48	2295	3	6	TSeries-05312019-1217-055	4p_100	4	100	52	0			0
Scn1a	48	2295	3	6	TSeries-05312019-1217-055	4p_100	4	100	53	0			0
Scn1a	48	2295	3	6	TSeries-05312019-1217-056	1p_500	1	500	0	0			0
Scn1a	48	2295	3	6	TSeries-05312019-1217-056	1p_500	1	500	1	0			0
Scn1a	48	2295	3	6	TSeries-05312019-1217-056	1p_500	1	500	2	0			0
Scn1a	48	2295	3	6	TSeries-05312019-1217-056	1p_500	1	500	3	1	1.24473		1	1.24473	2
Scn1a	48	2295	3	6	TSeries-05312019-1217-056	1p_500	1	500	4	0			0
Scn1a	48	2295	3	6	TSeries-05312019-1217-056	1p_500	1	500	5	0			0
Scn1a	48	2295	3	6	TSeries-05312019-1217-056	1p_500	1	500	6	0			0
Scn1a	48	2295	3	6	TSeries-05312019-1217-056	1p_500	1	500	7	0			0
Scn1a	48	2295	3	6	TSeries-05312019-1217-056	1p_500	1	500	8	0			0
Scn1a	48	2295	3	6	TSeries-05312019-1217-056	1p_500	1	500	9	0			0
Scn1a	48	2295	3	6	TSeries-05312019-1217-056	1p_500	1	500	10	0			0
Scn1a	48	2295	3	6	TSeries-05312019-1217-056	1p_500	1	500	11	0			0
Scn1a	48	2295	3	6	TSeries-05312019-1217-056	1p_500	1	500	12	0			0
Scn1a	48	2295	3	6	TSeries-05312019-1217-056	1p_500	1	500	13	0			0
Scn1a	48	2295	3	6	TSeries-05312019-1217-056	1p_500	1	500	14	0			0
Scn1a	48	2295	3	6	TSeries-05312019-1217-056	1p_500	1	500	15	0			0
Scn1a	48	2295	3	6	TSeries-05312019-1217-056	1p_500	1	500	16	0			0
Scn1a	48	2295	3	6	TSeries-05312019-1217-056	1p_500	1	500	17	0			0
Scn1a	48	2295	3	6	TSeries-05312019-1217-056	1p_500	1	500	18	0			0
Scn1a	48	2295	3	6	TSeries-05312019-1217-056	1p_500	1	500	19	0			0
Scn1a	48	2295	3	6	TSeries-05312019-1217-056	1p_500	1	500	20	0			0
Scn1a	48	2295	3	6	TSeries-05312019-1217-056	1p_500	1	500	21	0			0
Scn1a	48	2295	3	6	TSeries-05312019-1217-056	1p_500	1	500	22	0			0
Scn1a	48	2295	3	6	TSeries-05312019-1217-056	1p_500	1	500	23	0			0
Scn1a	48	2295	3	6	TSeries-05312019-1217-056	1p_500	1	500	24	0			0
Scn1a	48	2295	3	6	TSeries-05312019-1217-056	1p_500	1	500	25	0			0
Scn1a	48	2295	3	6	TSeries-05312019-1217-056	1p_500	1	500	26	0			0
Scn1a	48	2295	3	6	TSeries-05312019-1217-056	1p_500	1	500	27	0			0
Scn1a	48	2295	3	6	TSeries-05312019-1217-056	1p_500	1	500	28	0			0
Scn1a	48	2295	3	6	TSeries-05312019-1217-056	1p_500	1	500	29	0			0
Scn1a	48	2295	3	6	TSeries-05312019-1217-056	1p_500	1	500	30	0			0
Scn1a	48	2295	3	6	TSeries-05312019-1217-056	1p_500	1	500	31	0			0
Scn1a	48	2295	3	6	TSeries-05312019-1217-056	1p_500	1	500	32	0			0
Scn1a	48	2295	3	6	TSeries-05312019-1217-056	1p_500	1	500	33	0			0
Scn1a	48	2295	3	6	TSeries-05312019-1217-056	1p_500	1	500	34	0			0
Scn1a	48	2295	3	6	TSeries-05312019-1217-056	1p_500	1	500	35	0			0
Scn1a	48	2295	3	6	TSeries-05312019-1217-056	1p_500	1	500	36	0			0
Scn1a	48	2295	3	6	TSeries-05312019-1217-056	1p_500	1	500	37	0			0
Scn1a	48	2295	3	6	TSeries-05312019-1217-056	1p_500	1	500	38	0			0
Scn1a	48	2295	3	6	TSeries-05312019-1217-056	1p_500	1	500	39	0			0
Scn1a	48	2295	3	6	TSeries-05312019-1217-056	1p_500	1	500	40	0			0
Scn1a	48	2295	3	6	TSeries-05312019-1217-056	1p_500	1	500	41	0			0
Scn1a	48	2295	3	6	TSeries-05312019-1217-056	1p_500	1	500	42	0			0
Scn1a	48	2295	3	6	TSeries-05312019-1217-056	1p_500	1	500	43	0			0
Scn1a	48	2295	3	6	TSeries-05312019-1217-056	1p_500	1	500	44	0			0
Scn1a	48	2295	3	6	TSeries-05312019-1217-056	1p_500	1	500	45	0			0
Scn1a	48	2295	3	6	TSeries-05312019-1217-056	1p_500	1	500	46	0			0
Scn1a	48	2295	3	6	TSeries-05312019-1217-056	1p_500	1	500	47	0			0
Scn1a	48	2295	3	6	TSeries-05312019-1217-056	1p_500	1	500	48	0			0
Scn1a	48	2295	3	6	TSeries-05312019-1217-056	1p_500	1	500	49	0			0
Scn1a	48	2295	3	6	TSeries-05312019-1217-056	1p_500	1	500	50	0			0
Scn1a	48	2295	3	6	TSeries-05312019-1217-056	1p_500	1	500	51	0			0
Scn1a	48	2295	3	6	TSeries-05312019-1217-056	1p_500	1	500	52	0			0
Scn1a	48	2295	3	6	TSeries-05312019-1217-056	1p_500	1	500	53	0			0
Scn1a	48	2295	3	6	TSeries-05312019-1217-057	1p_400	1	400	0	0			0
Scn1a	48	2295	3	6	TSeries-05312019-1217-057	1p_400	1	400	1	1	1.02775		0
Scn1a	48	2295	3	6	TSeries-05312019-1217-057	1p_400	1	400	2	0			0
Scn1a	48	2295	3	6	TSeries-05312019-1217-057	1p_400	1	400	3	0			0
Scn1a	48	2295	3	6	TSeries-05312019-1217-057	1p_400	1	400	4	0			0
Scn1a	48	2295	3	6	TSeries-05312019-1217-057	1p_400	1	400	5	0			0
Scn1a	48	2295	3	6	TSeries-05312019-1217-057	1p_400	1	400	6	0			0
Scn1a	48	2295	3	6	TSeries-05312019-1217-057	1p_400	1	400	7	0			0
Scn1a	48	2295	3	6	TSeries-05312019-1217-057	1p_400	1	400	8	0			0
Scn1a	48	2295	3	6	TSeries-05312019-1217-057	1p_400	1	400	9	0			0
Scn1a	48	2295	3	6	TSeries-05312019-1217-057	1p_400	1	400	10	0			0
Scn1a	48	2295	3	6	TSeries-05312019-1217-057	1p_400	1	400	11	0			0
Scn1a	48	2295	3	6	TSeries-05312019-1217-057	1p_400	1	400	12	0			0
Scn1a	48	2295	3	6	TSeries-05312019-1217-057	1p_400	1	400	13	0			0
Scn1a	48	2295	3	6	TSeries-05312019-1217-057	1p_400	1	400	14	0			0
Scn1a	48	2295	3	6	TSeries-05312019-1217-057	1p_400	1	400	15	0			0
Scn1a	48	2295	3	6	TSeries-05312019-1217-057	1p_400	1	400	16	0			0
Scn1a	48	2295	3	6	TSeries-05312019-1217-057	1p_400	1	400	17	0			0
Scn1a	48	2295	3	6	TSeries-05312019-1217-057	1p_400	1	400	18	0			0
Scn1a	48	2295	3	6	TSeries-05312019-1217-057	1p_400	1	400	19	0			0
Scn1a	48	2295	3	6	TSeries-05312019-1217-057	1p_400	1	400	20	0			0
Scn1a	48	2295	3	6	TSeries-05312019-1217-057	1p_400	1	400	21	0			0
Scn1a	48	2295	3	6	TSeries-05312019-1217-057	1p_400	1	400	22	0			0
Scn1a	48	2295	3	6	TSeries-05312019-1217-057	1p_400	1	400	23	0			0
Scn1a	48	2295	3	6	TSeries-05312019-1217-057	1p_400	1	400	24	0			0
Scn1a	48	2295	3	6	TSeries-05312019-1217-057	1p_400	1	400	25	0			0
Scn1a	48	2295	3	6	TSeries-05312019-1217-057	1p_400	1	400	26	0			0
Scn1a	48	2295	3	6	TSeries-05312019-1217-057	1p_400	1	400	27	0			0
Scn1a	48	2295	3	6	TSeries-05312019-1217-057	1p_400	1	400	28	0			0
Scn1a	48	2295	3	6	TSeries-05312019-1217-057	1p_400	1	400	29	0			0
Scn1a	48	2295	3	6	TSeries-05312019-1217-057	1p_400	1	400	30	0			0
Scn1a	48	2295	3	6	TSeries-05312019-1217-057	1p_400	1	400	31	0			0
Scn1a	48	2295	3	6	TSeries-05312019-1217-057	1p_400	1	400	32	0			0
Scn1a	48	2295	3	6	TSeries-05312019-1217-057	1p_400	1	400	33	0			0
Scn1a	48	2295	3	6	TSeries-05312019-1217-057	1p_400	1	400	34	0			0
Scn1a	48	2295	3	6	TSeries-05312019-1217-057	1p_400	1	400	35	0			0
Scn1a	48	2295	3	6	TSeries-05312019-1217-057	1p_400	1	400	36	0			0
Scn1a	48	2295	3	6	TSeries-05312019-1217-057	1p_400	1	400	37	0			0
Scn1a	48	2295	3	6	TSeries-05312019-1217-057	1p_400	1	400	38	0			0
Scn1a	48	2295	3	6	TSeries-05312019-1217-057	1p_400	1	400	39	1	0.348358		1	0.348358	1
Scn1a	48	2295	3	6	TSeries-05312019-1217-057	1p_400	1	400	40	0			0
Scn1a	48	2295	3	6	TSeries-05312019-1217-057	1p_400	1	400	41	0			0
Scn1a	48	2295	3	6	TSeries-05312019-1217-057	1p_400	1	400	42	0			0
Scn1a	48	2295	3	6	TSeries-05312019-1217-057	1p_400	1	400	43	0			0
Scn1a	48	2295	3	6	TSeries-05312019-1217-057	1p_400	1	400	44	0			0
Scn1a	48	2295	3	6	TSeries-05312019-1217-057	1p_400	1	400	45	0			0
Scn1a	48	2295	3	6	TSeries-05312019-1217-057	1p_400	1	400	46	0			0
Scn1a	48	2295	3	6	TSeries-05312019-1217-057	1p_400	1	400	47	0			0
Scn1a	48	2295	3	6	TSeries-05312019-1217-057	1p_400	1	400	48	0			0
Scn1a	48	2295	3	6	TSeries-05312019-1217-057	1p_400	1	400	49	0			0
Scn1a	48	2295	3	6	TSeries-05312019-1217-057	1p_400	1	400	50	0			0
Scn1a	48	2295	3	6	TSeries-05312019-1217-057	1p_400	1	400	51	0			0
Scn1a	48	2295	3	6	TSeries-05312019-1217-057	1p_400	1	400	52	0			0
Scn1a	48	2295	3	6	TSeries-05312019-1217-057	1p_400	1	400	53	1	0.407702		1	0.407702	1
Scn1a	48	2295	3	6	TSeries-05312019-1217-058	1p_300	1	300	0	0			0
Scn1a	48	2295	3	6	TSeries-05312019-1217-058	1p_300	1	300	1	0			0
Scn1a	48	2295	3	6	TSeries-05312019-1217-058	1p_300	1	300	2	0			0
Scn1a	48	2295	3	6	TSeries-05312019-1217-058	1p_300	1	300	3	0			0
Scn1a	48	2295	3	6	TSeries-05312019-1217-058	1p_300	1	300	4	0			0
Scn1a	48	2295	3	6	TSeries-05312019-1217-058	1p_300	1	300	5	0			0
Scn1a	48	2295	3	6	TSeries-05312019-1217-058	1p_300	1	300	6	0			0
Scn1a	48	2295	3	6	TSeries-05312019-1217-058	1p_300	1	300	7	0			0
Scn1a	48	2295	3	6	TSeries-05312019-1217-058	1p_300	1	300	8	0			0
Scn1a	48	2295	3	6	TSeries-05312019-1217-058	1p_300	1	300	9	0			0
Scn1a	48	2295	3	6	TSeries-05312019-1217-058	1p_300	1	300	10	0			0
Scn1a	48	2295	3	6	TSeries-05312019-1217-058	1p_300	1	300	11	0			0
Scn1a	48	2295	3	6	TSeries-05312019-1217-058	1p_300	1	300	12	0			0
Scn1a	48	2295	3	6	TSeries-05312019-1217-058	1p_300	1	300	13	0			0
Scn1a	48	2295	3	6	TSeries-05312019-1217-058	1p_300	1	300	14	0			0
Scn1a	48	2295	3	6	TSeries-05312019-1217-058	1p_300	1	300	15	0			0
Scn1a	48	2295	3	6	TSeries-05312019-1217-058	1p_300	1	300	16	0			0
Scn1a	48	2295	3	6	TSeries-05312019-1217-058	1p_300	1	300	17	0			0
Scn1a	48	2295	3	6	TSeries-05312019-1217-058	1p_300	1	300	18	0			0
Scn1a	48	2295	3	6	TSeries-05312019-1217-058	1p_300	1	300	19	0			0
Scn1a	48	2295	3	6	TSeries-05312019-1217-058	1p_300	1	300	20	0			0
Scn1a	48	2295	3	6	TSeries-05312019-1217-058	1p_300	1	300	21	0			0
Scn1a	48	2295	3	6	TSeries-05312019-1217-058	1p_300	1	300	22	0			0
Scn1a	48	2295	3	6	TSeries-05312019-1217-058	1p_300	1	300	23	0			0
Scn1a	48	2295	3	6	TSeries-05312019-1217-058	1p_300	1	300	24	0			0
Scn1a	48	2295	3	6	TSeries-05312019-1217-058	1p_300	1	300	25	0			0
Scn1a	48	2295	3	6	TSeries-05312019-1217-058	1p_300	1	300	26	0			0
Scn1a	48	2295	3	6	TSeries-05312019-1217-058	1p_300	1	300	27	0			0
Scn1a	48	2295	3	6	TSeries-05312019-1217-058	1p_300	1	300	28	0			0
Scn1a	48	2295	3	6	TSeries-05312019-1217-058	1p_300	1	300	29	0			0
Scn1a	48	2295	3	6	TSeries-05312019-1217-058	1p_300	1	300	30	0			0
Scn1a	48	2295	3	6	TSeries-05312019-1217-058	1p_300	1	300	31	0			0
Scn1a	48	2295	3	6	TSeries-05312019-1217-058	1p_300	1	300	32	0			0
Scn1a	48	2295	3	6	TSeries-05312019-1217-058	1p_300	1	300	33	0			0
Scn1a	48	2295	3	6	TSeries-05312019-1217-058	1p_300	1	300	34	0			0
Scn1a	48	2295	3	6	TSeries-05312019-1217-058	1p_300	1	300	35	0			0
Scn1a	48	2295	3	6	TSeries-05312019-1217-058	1p_300	1	300	36	0			0
Scn1a	48	2295	3	6	TSeries-05312019-1217-058	1p_300	1	300	37	0			0
Scn1a	48	2295	3	6	TSeries-05312019-1217-058	1p_300	1	300	38	0			0
Scn1a	48	2295	3	6	TSeries-05312019-1217-058	1p_300	1	300	39	0			0
Scn1a	48	2295	3	6	TSeries-05312019-1217-058	1p_300	1	300	40	0			0
Scn1a	48	2295	3	6	TSeries-05312019-1217-058	1p_300	1	300	41	0			0
Scn1a	48	2295	3	6	TSeries-05312019-1217-058	1p_300	1	300	42	0			0
Scn1a	48	2295	3	6	TSeries-05312019-1217-058	1p_300	1	300	43	0			0
Scn1a	48	2295	3	6	TSeries-05312019-1217-058	1p_300	1	300	44	0			0
Scn1a	48	2295	3	6	TSeries-05312019-1217-058	1p_300	1	300	45	0			0
Scn1a	48	2295	3	6	TSeries-05312019-1217-058	1p_300	1	300	46	0			0
Scn1a	48	2295	3	6	TSeries-05312019-1217-058	1p_300	1	300	47	0			0
Scn1a	48	2295	3	6	TSeries-05312019-1217-058	1p_300	1	300	48	0			0
Scn1a	48	2295	3	6	TSeries-05312019-1217-058	1p_300	1	300	49	0			0
Scn1a	48	2295	3	6	TSeries-05312019-1217-058	1p_300	1	300	50	0			0
Scn1a	48	2295	3	6	TSeries-05312019-1217-058	1p_300	1	300	51	0			0
Scn1a	48	2295	3	6	TSeries-05312019-1217-058	1p_300	1	300	52	0			0
Scn1a	48	2295	3	6	TSeries-05312019-1217-058	1p_300	1	300	53	0			0
Scn1a	48	2295	3	6	TSeries-05312019-1217-059	1p_200	1	200	0	0			0
Scn1a	48	2295	3	6	TSeries-05312019-1217-059	1p_200	1	200	1	0			0
Scn1a	48	2295	3	6	TSeries-05312019-1217-059	1p_200	1	200	2	0			0
Scn1a	48	2295	3	6	TSeries-05312019-1217-059	1p_200	1	200	3	0			0
Scn1a	48	2295	3	6	TSeries-05312019-1217-059	1p_200	1	200	4	0			0
Scn1a	48	2295	3	6	TSeries-05312019-1217-059	1p_200	1	200	5	0			0
Scn1a	48	2295	3	6	TSeries-05312019-1217-059	1p_200	1	200	6	0			0
Scn1a	48	2295	3	6	TSeries-05312019-1217-059	1p_200	1	200	7	0			0
Scn1a	48	2295	3	6	TSeries-05312019-1217-059	1p_200	1	200	8	0			0
Scn1a	48	2295	3	6	TSeries-05312019-1217-059	1p_200	1	200	9	0			0
Scn1a	48	2295	3	6	TSeries-05312019-1217-059	1p_200	1	200	10	0			0
Scn1a	48	2295	3	6	TSeries-05312019-1217-059	1p_200	1	200	11	0			0
Scn1a	48	2295	3	6	TSeries-05312019-1217-059	1p_200	1	200	12	0			0
Scn1a	48	2295	3	6	TSeries-05312019-1217-059	1p_200	1	200	13	0			0
Scn1a	48	2295	3	6	TSeries-05312019-1217-059	1p_200	1	200	14	0			0
Scn1a	48	2295	3	6	TSeries-05312019-1217-059	1p_200	1	200	15	0			0
Scn1a	48	2295	3	6	TSeries-05312019-1217-059	1p_200	1	200	16	0			0
Scn1a	48	2295	3	6	TSeries-05312019-1217-059	1p_200	1	200	17	0			0
Scn1a	48	2295	3	6	TSeries-05312019-1217-059	1p_200	1	200	18	0			0
Scn1a	48	2295	3	6	TSeries-05312019-1217-059	1p_200	1	200	19	0			0
Scn1a	48	2295	3	6	TSeries-05312019-1217-059	1p_200	1	200	20	0			0
Scn1a	48	2295	3	6	TSeries-05312019-1217-059	1p_200	1	200	21	0			0
Scn1a	48	2295	3	6	TSeries-05312019-1217-059	1p_200	1	200	22	0			0
Scn1a	48	2295	3	6	TSeries-05312019-1217-059	1p_200	1	200	23	0			0
Scn1a	48	2295	3	6	TSeries-05312019-1217-059	1p_200	1	200	24	0			0
Scn1a	48	2295	3	6	TSeries-05312019-1217-059	1p_200	1	200	25	0			0
Scn1a	48	2295	3	6	TSeries-05312019-1217-059	1p_200	1	200	26	0			0
Scn1a	48	2295	3	6	TSeries-05312019-1217-059	1p_200	1	200	27	0			0
Scn1a	48	2295	3	6	TSeries-05312019-1217-059	1p_200	1	200	28	0			0
Scn1a	48	2295	3	6	TSeries-05312019-1217-059	1p_200	1	200	29	0			0
Scn1a	48	2295	3	6	TSeries-05312019-1217-059	1p_200	1	200	30	0			0
Scn1a	48	2295	3	6	TSeries-05312019-1217-059	1p_200	1	200	31	0			0
Scn1a	48	2295	3	6	TSeries-05312019-1217-059	1p_200	1	200	32	0			0
Scn1a	48	2295	3	6	TSeries-05312019-1217-059	1p_200	1	200	33	0			0
Scn1a	48	2295	3	6	TSeries-05312019-1217-059	1p_200	1	200	34	0			0
Scn1a	48	2295	3	6	TSeries-05312019-1217-059	1p_200	1	200	35	0			0
Scn1a	48	2295	3	6	TSeries-05312019-1217-059	1p_200	1	200	36	0			0
Scn1a	48	2295	3	6	TSeries-05312019-1217-059	1p_200	1	200	37	0			0
Scn1a	48	2295	3	6	TSeries-05312019-1217-059	1p_200	1	200	38	0			0
Scn1a	48	2295	3	6	TSeries-05312019-1217-059	1p_200	1	200	39	0			0
Scn1a	48	2295	3	6	TSeries-05312019-1217-059	1p_200	1	200	40	0			0
Scn1a	48	2295	3	6	TSeries-05312019-1217-059	1p_200	1	200	41	0			0
Scn1a	48	2295	3	6	TSeries-05312019-1217-059	1p_200	1	200	42	0			0
Scn1a	48	2295	3	6	TSeries-05312019-1217-059	1p_200	1	200	43	0			0
Scn1a	48	2295	3	6	TSeries-05312019-1217-059	1p_200	1	200	44	0			0
Scn1a	48	2295	3	6	TSeries-05312019-1217-059	1p_200	1	200	45	0			0
Scn1a	48	2295	3	6	TSeries-05312019-1217-059	1p_200	1	200	46	0			0
Scn1a	48	2295	3	6	TSeries-05312019-1217-059	1p_200	1	200	47	0			0
Scn1a	48	2295	3	6	TSeries-05312019-1217-059	1p_200	1	200	48	0			0
Scn1a	48	2295	3	6	TSeries-05312019-1217-059	1p_200	1	200	49	0			0
Scn1a	48	2295	3	6	TSeries-05312019-1217-059	1p_200	1	200	50	0			0
Scn1a	48	2295	3	6	TSeries-05312019-1217-059	1p_200	1	200	51	0			0
Scn1a	48	2295	3	6	TSeries-05312019-1217-059	1p_200	1	200	52	0			0
Scn1a	48	2295	3	6	TSeries-05312019-1217-059	1p_200	1	200	53	0			0
Scn1a	48	2295	3	6	TSeries-05312019-1217-060	1p_100	1	100	0	0			0
Scn1a	48	2295	3	6	TSeries-05312019-1217-060	1p_100	1	100	1	0			0
Scn1a	48	2295	3	6	TSeries-05312019-1217-060	1p_100	1	100	2	0			0
Scn1a	48	2295	3	6	TSeries-05312019-1217-060	1p_100	1	100	3	0			0
Scn1a	48	2295	3	6	TSeries-05312019-1217-060	1p_100	1	100	4	0			0
Scn1a	48	2295	3	6	TSeries-05312019-1217-060	1p_100	1	100	5	0			0
Scn1a	48	2295	3	6	TSeries-05312019-1217-060	1p_100	1	100	6	0			0
Scn1a	48	2295	3	6	TSeries-05312019-1217-060	1p_100	1	100	7	0			0
Scn1a	48	2295	3	6	TSeries-05312019-1217-060	1p_100	1	100	8	0			0
Scn1a	48	2295	3	6	TSeries-05312019-1217-060	1p_100	1	100	9	0			0
Scn1a	48	2295	3	6	TSeries-05312019-1217-060	1p_100	1	100	10	0			0
Scn1a	48	2295	3	6	TSeries-05312019-1217-060	1p_100	1	100	11	0			0
Scn1a	48	2295	3	6	TSeries-05312019-1217-060	1p_100	1	100	12	0			0
Scn1a	48	2295	3	6	TSeries-05312019-1217-060	1p_100	1	100	13	0			0
Scn1a	48	2295	3	6	TSeries-05312019-1217-060	1p_100	1	100	14	0			0
Scn1a	48	2295	3	6	TSeries-05312019-1217-060	1p_100	1	100	15	0			0
Scn1a	48	2295	3	6	TSeries-05312019-1217-060	1p_100	1	100	16	0			0
Scn1a	48	2295	3	6	TSeries-05312019-1217-060	1p_100	1	100	17	0			0
Scn1a	48	2295	3	6	TSeries-05312019-1217-060	1p_100	1	100	18	0			0
Scn1a	48	2295	3	6	TSeries-05312019-1217-060	1p_100	1	100	19	0			0
Scn1a	48	2295	3	6	TSeries-05312019-1217-060	1p_100	1	100	20	0			0
Scn1a	48	2295	3	6	TSeries-05312019-1217-060	1p_100	1	100	21	0			0
Scn1a	48	2295	3	6	TSeries-05312019-1217-060	1p_100	1	100	22	0			0
Scn1a	48	2295	3	6	TSeries-05312019-1217-060	1p_100	1	100	23	0			0
Scn1a	48	2295	3	6	TSeries-05312019-1217-060	1p_100	1	100	24	0			0
Scn1a	48	2295	3	6	TSeries-05312019-1217-060	1p_100	1	100	25	0			0
Scn1a	48	2295	3	6	TSeries-05312019-1217-060	1p_100	1	100	26	0			0
Scn1a	48	2295	3	6	TSeries-05312019-1217-060	1p_100	1	100	27	0			0
Scn1a	48	2295	3	6	TSeries-05312019-1217-060	1p_100	1	100	28	0			0
Scn1a	48	2295	3	6	TSeries-05312019-1217-060	1p_100	1	100	29	0			0
Scn1a	48	2295	3	6	TSeries-05312019-1217-060	1p_100	1	100	30	0			0
Scn1a	48	2295	3	6	TSeries-05312019-1217-060	1p_100	1	100	31	0			0
Scn1a	48	2295	3	6	TSeries-05312019-1217-060	1p_100	1	100	32	0			0
Scn1a	48	2295	3	6	TSeries-05312019-1217-060	1p_100	1	100	33	0			0
Scn1a	48	2295	3	6	TSeries-05312019-1217-060	1p_100	1	100	34	0			0
Scn1a	48	2295	3	6	TSeries-05312019-1217-060	1p_100	1	100	35	0			0
Scn1a	48	2295	3	6	TSeries-05312019-1217-060	1p_100	1	100	36	0			0
Scn1a	48	2295	3	6	TSeries-05312019-1217-060	1p_100	1	100	37	0			0
Scn1a	48	2295	3	6	TSeries-05312019-1217-060	1p_100	1	100	38	0			0
Scn1a	48	2295	3	6	TSeries-05312019-1217-060	1p_100	1	100	39	0			0
Scn1a	48	2295	3	6	TSeries-05312019-1217-060	1p_100	1	100	40	0			0
Scn1a	48	2295	3	6	TSeries-05312019-1217-060	1p_100	1	100	41	0			0
Scn1a	48	2295	3	6	TSeries-05312019-1217-060	1p_100	1	100	42	0			0
Scn1a	48	2295	3	6	TSeries-05312019-1217-060	1p_100	1	100	43	0			0
Scn1a	48	2295	3	6	TSeries-05312019-1217-060	1p_100	1	100	44	0			0
Scn1a	48	2295	3	6	TSeries-05312019-1217-060	1p_100	1	100	45	0			0
Scn1a	48	2295	3	6	TSeries-05312019-1217-060	1p_100	1	100	46	0			0
Scn1a	48	2295	3	6	TSeries-05312019-1217-060	1p_100	1	100	47	0			0
Scn1a	48	2295	3	6	TSeries-05312019-1217-060	1p_100	1	100	48	0			0
Scn1a	48	2295	3	6	TSeries-05312019-1217-060	1p_100	1	100	49	0			0
Scn1a	48	2295	3	6	TSeries-05312019-1217-060	1p_100	1	100	50	0			0
Scn1a	48	2295	3	6	TSeries-05312019-1217-060	1p_100	1	100	51	0			0
Scn1a	48	2295	3	6	TSeries-05312019-1217-060	1p_100	1	100	52	0			0
Scn1a	48	2295	3	6	TSeries-05312019-1217-060	1p_100	1	100	53	0			0
Scn1a	48	2295	4	9	TSeries-05312019-1217-091	4p_500	4	500	0	0		122.909	0
Scn1a	48	2295	4	9	TSeries-05312019-1217-091	4p_500	4	500	1	1	0.71391	110.921	1	0.71391	2
Scn1a	48	2295	4	9	TSeries-05312019-1217-091	4p_500	4	500	2	1	0.606032	78.0059	1	0.606032	1
Scn1a	48	2295	4	9	TSeries-05312019-1217-091	4p_500	4	500	3	1	2.62105	95.9538	1	2.62105	5
Scn1a	48	2295	4	9	TSeries-05312019-1217-091	4p_500	4	500	4	1	2.76087	104.15	1	2.76087	4
Scn1a	48	2295	4	9	TSeries-05312019-1217-091	4p_500	4	500	5	1	1.70775	86.6302	1	1.70775	2
Scn1a	48	2295	4	9	TSeries-05312019-1217-091	4p_500	4	500	6	1	0.401638	63.5249	1	0.401638	1
Scn1a	48	2295	4	9	TSeries-05312019-1217-091	4p_500	4	500	7	1	1.72085	17.1221	1	1.72085	2
Scn1a	48	2295	4	9	TSeries-05312019-1217-091	4p_500	4	500	8	1	0.2966	57.7538	1	0.2966	1
Scn1a	48	2295	4	9	TSeries-05312019-1217-091	4p_500	4	500	9	1	2.01175	65.0199	1	2.01175	2
Scn1a	48	2295	4	9	TSeries-05312019-1217-091	4p_500	4	500	10	1	0.561375	109.733	1	0.561375	2
Scn1a	48	2295	4	9	TSeries-05312019-1217-091	4p_500	4	500	11	1	2.68091	78.7958	1	2.68091	4
Scn1a	48	2295	4	9	TSeries-05312019-1217-091	4p_500	4	500	12	1	0.645276	53.8014	1	0.645276	2
Scn1a	48	2295	4	9	TSeries-05312019-1217-091	4p_500	4	500	13	1	1.12745	16.9125	1	1.12745	2
Scn1a	48	2295	4	9	TSeries-05312019-1217-091	4p_500	4	500	14	0		14.5367	0
Scn1a	48	2295	4	9	TSeries-05312019-1217-091	4p_500	4	500	15	0		68.4069	0
Scn1a	48	2295	4	9	TSeries-05312019-1217-091	4p_500	4	500	16	1	0.448701	78.5075	1	0.448701	2
Scn1a	48	2295	4	9	TSeries-05312019-1217-091	4p_500	4	500	17	1	0.265309	91.7543	1	0.265309	1
Scn1a	48	2295	4	9	TSeries-05312019-1217-091	4p_500	4	500	18	1	0.330632	102.948	1	0.330632	1
Scn1a	48	2295	4	9	TSeries-05312019-1217-091	4p_500	4	500	19	1	0.207066	118.603	1	0.207066	1
Scn1a	48	2295	4	9	TSeries-05312019-1217-091	4p_500	4	500	20	0		23.1614	0
Scn1a	48	2295	4	9	TSeries-05312019-1217-091	4p_500	4	500	21	0		43.728	0
Scn1a	48	2295	4	9	TSeries-05312019-1217-091	4p_500	4	500	22	0		47.7209	0
Scn1a	48	2295	4	9	TSeries-05312019-1217-091	4p_500	4	500	23	1	1.54009	71.2208	1	1.54009	2
Scn1a	48	2295	4	9	TSeries-05312019-1217-091	4p_500	4	500	24	1	2.0479	71.7683	1	2.0479	3
Scn1a	48	2295	4	9	TSeries-05312019-1217-091	4p_500	4	500	25	1	1.81337	23.0118	1	1.81337	2
Scn1a	48	2295	4	9	TSeries-05312019-1217-091	4p_500	4	500	26	0		43.3507	0
Scn1a	48	2295	4	9	TSeries-05312019-1217-091	4p_500	4	500	27	1	0.223917	63.0411	1	0.223917	1
Scn1a	48	2295	4	9	TSeries-05312019-1217-091	4p_500	4	500	28	1	0.505852	58.987	1	0.505852	1
Scn1a	48	2295	4	9	TSeries-05312019-1217-091	4p_500	4	500	29	0		42.088	0
Scn1a	48	2295	4	9	TSeries-05312019-1217-091	4p_500	4	500	30	0		59.8101	0
Scn1a	48	2295	4	9	TSeries-05312019-1217-091	4p_500	4	500	31	1	1.86168	69.1902	1	1.86168	3
Scn1a	48	2295	4	9	TSeries-05312019-1217-091	4p_500	4	500	32	1	0.786691	118.794	1	0.786691	2
Scn1a	48	2295	4	9	TSeries-05312019-1217-091	4p_500	4	500	33	1	2.30982	94.0057	1	2.30982	3
Scn1a	48	2295	4	9	TSeries-05312019-1217-091	4p_500	4	500	34	1	2.03547	99.4641	1	2.03547	2
Scn1a	48	2295	4	9	TSeries-05312019-1217-091	4p_500	4	500	35	1	1.1524	69.9873	1	1.1524	2
Scn1a	48	2295	4	9	TSeries-05312019-1217-091	4p_500	4	500	36	1	1.76229	52.7309	1	1.76229	3
Scn1a	48	2295	4	9	TSeries-05312019-1217-091	4p_500	4	500	37	1	0.829028	29.723	1	0.829028	2
Scn1a	48	2295	4	9	TSeries-05312019-1217-091	4p_500	4	500	38	1	0.35313	23.6855	1	0.35313	2
Scn1a	48	2295	4	9	TSeries-05312019-1217-091	4p_500	4	500	39	1	2.12457	36.9233	1	2.12457	3
Scn1a	48	2295	4	9	TSeries-05312019-1217-091	4p_500	4	500	40	1	1.11236	41.5378	1	1.11236	2
Scn1a	48	2295	4	9	TSeries-05312019-1217-091	4p_500	4	500	41	1	0.426836	15.9124	1	0.426836	1
Scn1a	48	2295	4	9	TSeries-05312019-1217-091	4p_500	4	500	42	0		24.6079	0
Scn1a	48	2295	4	9	TSeries-05312019-1217-091	4p_500	4	500	43	0		36.0141	0
Scn1a	48	2295	4	9	TSeries-05312019-1217-091	4p_500	4	500	44	0		23.7561	0
Scn1a	48	2295	4	9	TSeries-05312019-1217-091	4p_500	4	500	45	1	1.30977	39.2914	1	1.30977	2
Scn1a	48	2295	4	9	TSeries-05312019-1217-091	4p_500	4	500	46	1	0.401652	53.9972	1	0.401652	1
Scn1a	48	2295	4	9	TSeries-05312019-1217-091	4p_500	4	500	47	1	0.203491	94.9033	1	0.203491	1
Scn1a	48	2295	4	9	TSeries-05312019-1217-091	4p_500	4	500	48	1	0.920051	94.5646	1	0.920051	2
Scn1a	48	2295	4	9	TSeries-05312019-1217-091	4p_500	4	500	49	0		114.461	0
Scn1a	48	2295	4	9	TSeries-05312019-1217-091	4p_500	4	500	50	1	0.202811	90.8636	1	0.202811	1
Scn1a	48	2295	4	9	TSeries-05312019-1217-091	4p_500	4	500	51	1	0.303253	90.5883	1	0.303253	1
Scn1a	48	2295	4	9	TSeries-05312019-1217-091	4p_500	4	500	52	1	0.769275	81.9403	1	0.769275	2
Scn1a	48	2295	4	9	TSeries-05312019-1217-091	4p_500	4	500	53	1	0.384549	29.3073	1	0.384549	1
Scn1a	48	2295	4	9	TSeries-05312019-1217-091	4p_500	4	500	54	1	0.440013	42.1911	1	0.440013	1
Scn1a	48	2295	4	9	TSeries-05312019-1217-091	4p_500	4	500	55	0		59.8749	0
Scn1a	48	2295	4	9	TSeries-05312019-1217-091	4p_500	4	500	56	1	0.394133	74.6814	1	0.394133	1
Scn1a	48	2295	4	9	TSeries-05312019-1217-091	4p_500	4	500	57	1	0.328778	61.0856	1	0.328778	1
Scn1a	48	2295	4	9	TSeries-05312019-1217-091	4p_500	4	500	58	1	0.53146	17.877	1	0.53146	1
Scn1a	48	2295	4	9	TSeries-05312019-1217-092	4p_400	4	400	0	1	0.285801		0
Scn1a	48	2295	4	9	TSeries-05312019-1217-092	4p_400	4	400	1	1	0.181643		1	0.181643	1
Scn1a	48	2295	4	9	TSeries-05312019-1217-092	4p_400	4	400	2	1	1.02058		1	1.02058	1
Scn1a	48	2295	4	9	TSeries-05312019-1217-092	4p_400	4	400	3	1	3.39888		1	3.39888	5
Scn1a	48	2295	4	9	TSeries-05312019-1217-092	4p_400	4	400	4	1	2.15621		1	2.15621	2
Scn1a	48	2295	4	9	TSeries-05312019-1217-092	4p_400	4	400	5	1	1.44826		1	1.44826	2
Scn1a	48	2295	4	9	TSeries-05312019-1217-092	4p_400	4	400	6	1	0.330262		1	0.330262	2
Scn1a	48	2295	4	9	TSeries-05312019-1217-092	4p_400	4	400	7	1	1.57952		1	1.57952	2
Scn1a	48	2295	4	9	TSeries-05312019-1217-092	4p_400	4	400	8	0			0
Scn1a	48	2295	4	9	TSeries-05312019-1217-092	4p_400	4	400	9	1	1.92685		1	1.92685	4
Scn1a	48	2295	4	9	TSeries-05312019-1217-092	4p_400	4	400	10	1	0.524027		1	0.524027	2
Scn1a	48	2295	4	9	TSeries-05312019-1217-092	4p_400	4	400	11	1	2.38761		1	2.38761	3
Scn1a	48	2295	4	9	TSeries-05312019-1217-092	4p_400	4	400	12	1	0.358		1	0.358	1
Scn1a	48	2295	4	9	TSeries-05312019-1217-092	4p_400	4	400	13	1	1.40224		1	1.40224	3
Scn1a	48	2295	4	9	TSeries-05312019-1217-092	4p_400	4	400	14	0			0
Scn1a	48	2295	4	9	TSeries-05312019-1217-092	4p_400	4	400	15	0			0
Scn1a	48	2295	4	9	TSeries-05312019-1217-092	4p_400	4	400	16	1	0.117366		1	0.117366	1
Scn1a	48	2295	4	9	TSeries-05312019-1217-092	4p_400	4	400	17	1	0.254876		1	0.254876	1
Scn1a	48	2295	4	9	TSeries-05312019-1217-092	4p_400	4	400	18	1	0.33367		1	0.33367	1
Scn1a	48	2295	4	9	TSeries-05312019-1217-092	4p_400	4	400	19	1	0.24087		1	0.24087	1
Scn1a	48	2295	4	9	TSeries-05312019-1217-092	4p_400	4	400	20	0			0
Scn1a	48	2295	4	9	TSeries-05312019-1217-092	4p_400	4	400	21	0			0
Scn1a	48	2295	4	9	TSeries-05312019-1217-092	4p_400	4	400	22	0			0
Scn1a	48	2295	4	9	TSeries-05312019-1217-092	4p_400	4	400	23	1	1.71227		1	1.71227	3
Scn1a	48	2295	4	9	TSeries-05312019-1217-092	4p_400	4	400	24	1	3.25251		1	3.25251	5
Scn1a	48	2295	4	9	TSeries-05312019-1217-092	4p_400	4	400	25	1	0.204234		1	0.204234	1
Scn1a	48	2295	4	9	TSeries-05312019-1217-092	4p_400	4	400	26	0			0
Scn1a	48	2295	4	9	TSeries-05312019-1217-092	4p_400	4	400	27	1	0.335195		1	0.335195	1
Scn1a	48	2295	4	9	TSeries-05312019-1217-092	4p_400	4	400	28	1	0.386917		1	0.386917	1
Scn1a	48	2295	4	9	TSeries-05312019-1217-092	4p_400	4	400	29	0			0
Scn1a	48	2295	4	9	TSeries-05312019-1217-092	4p_400	4	400	30	0			0
Scn1a	48	2295	4	9	TSeries-05312019-1217-092	4p_400	4	400	31	1	1.91547		1	1.91547	3
Scn1a	48	2295	4	9	TSeries-05312019-1217-092	4p_400	4	400	32	1	0.580971		1	0.580971	2
Scn1a	48	2295	4	9	TSeries-05312019-1217-092	4p_400	4	400	33	1	2.18925		1	2.18925	3
Scn1a	48	2295	4	9	TSeries-05312019-1217-092	4p_400	4	400	34	1	2.15954		1	2.15954	2
Scn1a	48	2295	4	9	TSeries-05312019-1217-092	4p_400	4	400	35	0			0
Scn1a	48	2295	4	9	TSeries-05312019-1217-092	4p_400	4	400	36	1	1.43975		1	1.43975	2
Scn1a	48	2295	4	9	TSeries-05312019-1217-092	4p_400	4	400	37	1	3.79389		1	3.79389	4
Scn1a	48	2295	4	9	TSeries-05312019-1217-092	4p_400	4	400	38	1	0.359767		1	0.359767	1
Scn1a	48	2295	4	9	TSeries-05312019-1217-092	4p_400	4	400	39	1	2.70963		1	2.70963	3
Scn1a	48	2295	4	9	TSeries-05312019-1217-092	4p_400	4	400	40	1	1.80092		1	1.80092	2
Scn1a	48	2295	4	9	TSeries-05312019-1217-092	4p_400	4	400	41	1	0.445513		1	0.445513	2
Scn1a	48	2295	4	9	TSeries-05312019-1217-092	4p_400	4	400	42	0			0
Scn1a	48	2295	4	9	TSeries-05312019-1217-092	4p_400	4	400	43	0			0
Scn1a	48	2295	4	9	TSeries-05312019-1217-092	4p_400	4	400	44	0			0
Scn1a	48	2295	4	9	TSeries-05312019-1217-092	4p_400	4	400	45	1	1.2066		1	1.2066	2
Scn1a	48	2295	4	9	TSeries-05312019-1217-092	4p_400	4	400	46	1	0.42898		1	0.42898	2
Scn1a	48	2295	4	9	TSeries-05312019-1217-092	4p_400	4	400	47	1	0.22319		1	0.22319	1
Scn1a	48	2295	4	9	TSeries-05312019-1217-092	4p_400	4	400	48	1	0.214433		1	0.214433	1
Scn1a	48	2295	4	9	TSeries-05312019-1217-092	4p_400	4	400	49	1	0.233022		0
Scn1a	48	2295	4	9	TSeries-05312019-1217-092	4p_400	4	400	50	0			0
Scn1a	48	2295	4	9	TSeries-05312019-1217-092	4p_400	4	400	51	1	0.351059		1	0.351059	1
Scn1a	48	2295	4	9	TSeries-05312019-1217-092	4p_400	4	400	52	1	0.523595		1	0.523595	1
Scn1a	48	2295	4	9	TSeries-05312019-1217-092	4p_400	4	400	53	1	0.246467		1	0.246467	1
Scn1a	48	2295	4	9	TSeries-05312019-1217-092	4p_400	4	400	54	1	0.508484		1	0.508484	2
Scn1a	48	2295	4	9	TSeries-05312019-1217-092	4p_400	4	400	55	0			0
Scn1a	48	2295	4	9	TSeries-05312019-1217-092	4p_400	4	400	56	0			0
Scn1a	48	2295	4	9	TSeries-05312019-1217-092	4p_400	4	400	57	1	0.458189		1	0.458189	1
Scn1a	48	2295	4	9	TSeries-05312019-1217-092	4p_400	4	400	58	1	0.51855		1	0.51855	1
Scn1a	48	2295	4	9	TSeries-05312019-1217-093	4p_300	4	300	0	0			0
Scn1a	48	2295	4	9	TSeries-05312019-1217-093	4p_300	4	300	1	0			0
Scn1a	48	2295	4	9	TSeries-05312019-1217-093	4p_300	4	300	2	1	0.794082		1	0.794082	3
Scn1a	48	2295	4	9	TSeries-05312019-1217-093	4p_300	4	300	3	1	2.60183		1	2.60183	5
Scn1a	48	2295	4	9	TSeries-05312019-1217-093	4p_300	4	300	4	1	0.942424		1	0.942424	1
Scn1a	48	2295	4	9	TSeries-05312019-1217-093	4p_300	4	300	5	0			0
Scn1a	48	2295	4	9	TSeries-05312019-1217-093	4p_300	4	300	6	0			0
Scn1a	48	2295	4	9	TSeries-05312019-1217-093	4p_300	4	300	7	0			0
Scn1a	48	2295	4	9	TSeries-05312019-1217-093	4p_300	4	300	8	0			0
Scn1a	48	2295	4	9	TSeries-05312019-1217-093	4p_300	4	300	9	1	1.25137		1	1.25137	2
Scn1a	48	2295	4	9	TSeries-05312019-1217-093	4p_300	4	300	10	0			0
Scn1a	48	2295	4	9	TSeries-05312019-1217-093	4p_300	4	300	11	1	1.86543		1	1.86543	2
Scn1a	48	2295	4	9	TSeries-05312019-1217-093	4p_300	4	300	12	1	0.516704		1	0.516704	1
Scn1a	48	2295	4	9	TSeries-05312019-1217-093	4p_300	4	300	13	0			0
Scn1a	48	2295	4	9	TSeries-05312019-1217-093	4p_300	4	300	14	0			0
Scn1a	48	2295	4	9	TSeries-05312019-1217-093	4p_300	4	300	15	0			0
Scn1a	48	2295	4	9	TSeries-05312019-1217-093	4p_300	4	300	16	0			0
Scn1a	48	2295	4	9	TSeries-05312019-1217-093	4p_300	4	300	17	0			0
Scn1a	48	2295	4	9	TSeries-05312019-1217-093	4p_300	4	300	18	1	0.232857		1	0.232857	1
Scn1a	48	2295	4	9	TSeries-05312019-1217-093	4p_300	4	300	19	0			0
Scn1a	48	2295	4	9	TSeries-05312019-1217-093	4p_300	4	300	20	0			0
Scn1a	48	2295	4	9	TSeries-05312019-1217-093	4p_300	4	300	21	0			0
Scn1a	48	2295	4	9	TSeries-05312019-1217-093	4p_300	4	300	22	0			0
Scn1a	48	2295	4	9	TSeries-05312019-1217-093	4p_300	4	300	23	1	1.65193		1	1.65193	2
Scn1a	48	2295	4	9	TSeries-05312019-1217-093	4p_300	4	300	24	1	1.87919		1	1.87919	3
Scn1a	48	2295	4	9	TSeries-05312019-1217-093	4p_300	4	300	25	0			0
Scn1a	48	2295	4	9	TSeries-05312019-1217-093	4p_300	4	300	26	0			0
Scn1a	48	2295	4	9	TSeries-05312019-1217-093	4p_300	4	300	27	0			0
Scn1a	48	2295	4	9	TSeries-05312019-1217-093	4p_300	4	300	28	0			0
Scn1a	48	2295	4	9	TSeries-05312019-1217-093	4p_300	4	300	29	0			0
Scn1a	48	2295	4	9	TSeries-05312019-1217-093	4p_300	4	300	30	0			0
Scn1a	48	2295	4	9	TSeries-05312019-1217-093	4p_300	4	300	31	1	0.271208		1	0.271208	1
Scn1a	48	2295	4	9	TSeries-05312019-1217-093	4p_300	4	300	32	1	0.452926		1	0.452926	1
Scn1a	48	2295	4	9	TSeries-05312019-1217-093	4p_300	4	300	33	0			0
Scn1a	48	2295	4	9	TSeries-05312019-1217-093	4p_300	4	300	34	1	1.33365		1	1.33365	2
Scn1a	48	2295	4	9	TSeries-05312019-1217-093	4p_300	4	300	35	0			0
Scn1a	48	2295	4	9	TSeries-05312019-1217-093	4p_300	4	300	36	1	1.24397		1	1.24397	2
Scn1a	48	2295	4	9	TSeries-05312019-1217-093	4p_300	4	300	37	1	0.533393		1	0.533393	1
Scn1a	48	2295	4	9	TSeries-05312019-1217-093	4p_300	4	300	38	0			0
Scn1a	48	2295	4	9	TSeries-05312019-1217-093	4p_300	4	300	39	1	2.01468		1	2.01468	2
Scn1a	48	2295	4	9	TSeries-05312019-1217-093	4p_300	4	300	40	0			0
Scn1a	48	2295	4	9	TSeries-05312019-1217-093	4p_300	4	300	41	0			0
Scn1a	48	2295	4	9	TSeries-05312019-1217-093	4p_300	4	300	42	0			0
Scn1a	48	2295	4	9	TSeries-05312019-1217-093	4p_300	4	300	43	0			0
Scn1a	48	2295	4	9	TSeries-05312019-1217-093	4p_300	4	300	44	0			0
Scn1a	48	2295	4	9	TSeries-05312019-1217-093	4p_300	4	300	45	0			0
Scn1a	48	2295	4	9	TSeries-05312019-1217-093	4p_300	4	300	46	0			0
Scn1a	48	2295	4	9	TSeries-05312019-1217-093	4p_300	4	300	47	0			0
Scn1a	48	2295	4	9	TSeries-05312019-1217-093	4p_300	4	300	48	0			0
Scn1a	48	2295	4	9	TSeries-05312019-1217-093	4p_300	4	300	49	0			0
Scn1a	48	2295	4	9	TSeries-05312019-1217-093	4p_300	4	300	50	0			0
Scn1a	48	2295	4	9	TSeries-05312019-1217-093	4p_300	4	300	51	0			0
Scn1a	48	2295	4	9	TSeries-05312019-1217-093	4p_300	4	300	52	1	0.31727		1	0.31727	1
Scn1a	48	2295	4	9	TSeries-05312019-1217-093	4p_300	4	300	53	0			0
Scn1a	48	2295	4	9	TSeries-05312019-1217-093	4p_300	4	300	54	0			0
Scn1a	48	2295	4	9	TSeries-05312019-1217-093	4p_300	4	300	55	1	0.252967		0
Scn1a	48	2295	4	9	TSeries-05312019-1217-093	4p_300	4	300	56	0			0
Scn1a	48	2295	4	9	TSeries-05312019-1217-093	4p_300	4	300	57	0			0
Scn1a	48	2295	4	9	TSeries-05312019-1217-093	4p_300	4	300	58	0			0
Scn1a	48	2295	4	9	TSeries-05312019-1217-094	4p_200	4	200	0	0			0
Scn1a	48	2295	4	9	TSeries-05312019-1217-094	4p_200	4	200	1	0			0
Scn1a	48	2295	4	9	TSeries-05312019-1217-094	4p_200	4	200	2	0			0
Scn1a	48	2295	4	9	TSeries-05312019-1217-094	4p_200	4	200	3	1	0.394905		1	0.394905	2
Scn1a	48	2295	4	9	TSeries-05312019-1217-094	4p_200	4	200	4	0			0
Scn1a	48	2295	4	9	TSeries-05312019-1217-094	4p_200	4	200	5	0			0
Scn1a	48	2295	4	9	TSeries-05312019-1217-094	4p_200	4	200	6	0			0
Scn1a	48	2295	4	9	TSeries-05312019-1217-094	4p_200	4	200	7	0			0
Scn1a	48	2295	4	9	TSeries-05312019-1217-094	4p_200	4	200	8	0			0
Scn1a	48	2295	4	9	TSeries-05312019-1217-094	4p_200	4	200	9	0			0
Scn1a	48	2295	4	9	TSeries-05312019-1217-094	4p_200	4	200	10	0			0
Scn1a	48	2295	4	9	TSeries-05312019-1217-094	4p_200	4	200	11	1	1.09116		1	1.09116	2
Scn1a	48	2295	4	9	TSeries-05312019-1217-094	4p_200	4	200	12	0			0
Scn1a	48	2295	4	9	TSeries-05312019-1217-094	4p_200	4	200	13	0			0
Scn1a	48	2295	4	9	TSeries-05312019-1217-094	4p_200	4	200	14	0			0
Scn1a	48	2295	4	9	TSeries-05312019-1217-094	4p_200	4	200	15	0			0
Scn1a	48	2295	4	9	TSeries-05312019-1217-094	4p_200	4	200	16	0			0
Scn1a	48	2295	4	9	TSeries-05312019-1217-094	4p_200	4	200	17	0			0
Scn1a	48	2295	4	9	TSeries-05312019-1217-094	4p_200	4	200	18	0			0
Scn1a	48	2295	4	9	TSeries-05312019-1217-094	4p_200	4	200	19	0			0
Scn1a	48	2295	4	9	TSeries-05312019-1217-094	4p_200	4	200	20	0			0
Scn1a	48	2295	4	9	TSeries-05312019-1217-094	4p_200	4	200	21	0			0
Scn1a	48	2295	4	9	TSeries-05312019-1217-094	4p_200	4	200	22	0			0
Scn1a	48	2295	4	9	TSeries-05312019-1217-094	4p_200	4	200	23	0			0
Scn1a	48	2295	4	9	TSeries-05312019-1217-094	4p_200	4	200	24	0			0
Scn1a	48	2295	4	9	TSeries-05312019-1217-094	4p_200	4	200	25	0			0
Scn1a	48	2295	4	9	TSeries-05312019-1217-094	4p_200	4	200	26	0			0
Scn1a	48	2295	4	9	TSeries-05312019-1217-094	4p_200	4	200	27	0			0
Scn1a	48	2295	4	9	TSeries-05312019-1217-094	4p_200	4	200	28	0			0
Scn1a	48	2295	4	9	TSeries-05312019-1217-094	4p_200	4	200	29	0			0
Scn1a	48	2295	4	9	TSeries-05312019-1217-094	4p_200	4	200	30	0			0
Scn1a	48	2295	4	9	TSeries-05312019-1217-094	4p_200	4	200	31	0			0
Scn1a	48	2295	4	9	TSeries-05312019-1217-094	4p_200	4	200	32	0			0
Scn1a	48	2295	4	9	TSeries-05312019-1217-094	4p_200	4	200	33	0			0
Scn1a	48	2295	4	9	TSeries-05312019-1217-094	4p_200	4	200	34	0			0
Scn1a	48	2295	4	9	TSeries-05312019-1217-094	4p_200	4	200	35	0			0
Scn1a	48	2295	4	9	TSeries-05312019-1217-094	4p_200	4	200	36	1	0.328589		1	0.328589	1
Scn1a	48	2295	4	9	TSeries-05312019-1217-094	4p_200	4	200	37	0			0
Scn1a	48	2295	4	9	TSeries-05312019-1217-094	4p_200	4	200	38	0			0
Scn1a	48	2295	4	9	TSeries-05312019-1217-094	4p_200	4	200	39	0			0
Scn1a	48	2295	4	9	TSeries-05312019-1217-094	4p_200	4	200	40	0			0
Scn1a	48	2295	4	9	TSeries-05312019-1217-094	4p_200	4	200	41	0			0
Scn1a	48	2295	4	9	TSeries-05312019-1217-094	4p_200	4	200	42	0			0
Scn1a	48	2295	4	9	TSeries-05312019-1217-094	4p_200	4	200	43	0			0
Scn1a	48	2295	4	9	TSeries-05312019-1217-094	4p_200	4	200	44	0			0
Scn1a	48	2295	4	9	TSeries-05312019-1217-094	4p_200	4	200	45	0			0
Scn1a	48	2295	4	9	TSeries-05312019-1217-094	4p_200	4	200	46	0			0
Scn1a	48	2295	4	9	TSeries-05312019-1217-094	4p_200	4	200	47	0			0
Scn1a	48	2295	4	9	TSeries-05312019-1217-094	4p_200	4	200	48	0			0
Scn1a	48	2295	4	9	TSeries-05312019-1217-094	4p_200	4	200	49	0			0
Scn1a	48	2295	4	9	TSeries-05312019-1217-094	4p_200	4	200	50	0			0
Scn1a	48	2295	4	9	TSeries-05312019-1217-094	4p_200	4	200	51	0			0
Scn1a	48	2295	4	9	TSeries-05312019-1217-094	4p_200	4	200	52	0			0
Scn1a	48	2295	4	9	TSeries-05312019-1217-094	4p_200	4	200	53	0			0
Scn1a	48	2295	4	9	TSeries-05312019-1217-094	4p_200	4	200	54	0			0
Scn1a	48	2295	4	9	TSeries-05312019-1217-094	4p_200	4	200	55	0			0
Scn1a	48	2295	4	9	TSeries-05312019-1217-094	4p_200	4	200	56	0			0
Scn1a	48	2295	4	9	TSeries-05312019-1217-094	4p_200	4	200	57	0			0
Scn1a	48	2295	4	9	TSeries-05312019-1217-094	4p_200	4	200	58	0			0
Scn1a	48	2295	4	9	TSeries-05312019-1217-095	4p_100	4	100	0	0			0
Scn1a	48	2295	4	9	TSeries-05312019-1217-095	4p_100	4	100	1	0			0
Scn1a	48	2295	4	9	TSeries-05312019-1217-095	4p_100	4	100	2	0			0
Scn1a	48	2295	4	9	TSeries-05312019-1217-095	4p_100	4	100	3	0			0
Scn1a	48	2295	4	9	TSeries-05312019-1217-095	4p_100	4	100	4	0			0
Scn1a	48	2295	4	9	TSeries-05312019-1217-095	4p_100	4	100	5	0			0
Scn1a	48	2295	4	9	TSeries-05312019-1217-095	4p_100	4	100	6	0			0
Scn1a	48	2295	4	9	TSeries-05312019-1217-095	4p_100	4	100	7	0			0
Scn1a	48	2295	4	9	TSeries-05312019-1217-095	4p_100	4	100	8	0			0
Scn1a	48	2295	4	9	TSeries-05312019-1217-095	4p_100	4	100	9	0			0
Scn1a	48	2295	4	9	TSeries-05312019-1217-095	4p_100	4	100	10	0			0
Scn1a	48	2295	4	9	TSeries-05312019-1217-095	4p_100	4	100	11	1	0.760143		1	0.760143	2
Scn1a	48	2295	4	9	TSeries-05312019-1217-095	4p_100	4	100	12	0			0
Scn1a	48	2295	4	9	TSeries-05312019-1217-095	4p_100	4	100	13	0			0
Scn1a	48	2295	4	9	TSeries-05312019-1217-095	4p_100	4	100	14	0			0
Scn1a	48	2295	4	9	TSeries-05312019-1217-095	4p_100	4	100	15	0			0
Scn1a	48	2295	4	9	TSeries-05312019-1217-095	4p_100	4	100	16	0			0
Scn1a	48	2295	4	9	TSeries-05312019-1217-095	4p_100	4	100	17	0			0
Scn1a	48	2295	4	9	TSeries-05312019-1217-095	4p_100	4	100	18	0			0
Scn1a	48	2295	4	9	TSeries-05312019-1217-095	4p_100	4	100	19	0			0
Scn1a	48	2295	4	9	TSeries-05312019-1217-095	4p_100	4	100	20	0			0
Scn1a	48	2295	4	9	TSeries-05312019-1217-095	4p_100	4	100	21	0			0
Scn1a	48	2295	4	9	TSeries-05312019-1217-095	4p_100	4	100	22	0			0
Scn1a	48	2295	4	9	TSeries-05312019-1217-095	4p_100	4	100	23	0			0
Scn1a	48	2295	4	9	TSeries-05312019-1217-095	4p_100	4	100	24	0			0
Scn1a	48	2295	4	9	TSeries-05312019-1217-095	4p_100	4	100	25	0			0
Scn1a	48	2295	4	9	TSeries-05312019-1217-095	4p_100	4	100	26	0			0
Scn1a	48	2295	4	9	TSeries-05312019-1217-095	4p_100	4	100	27	0			0
Scn1a	48	2295	4	9	TSeries-05312019-1217-095	4p_100	4	100	28	0			0
Scn1a	48	2295	4	9	TSeries-05312019-1217-095	4p_100	4	100	29	0			0
Scn1a	48	2295	4	9	TSeries-05312019-1217-095	4p_100	4	100	30	0			0
Scn1a	48	2295	4	9	TSeries-05312019-1217-095	4p_100	4	100	31	0			0
Scn1a	48	2295	4	9	TSeries-05312019-1217-095	4p_100	4	100	32	0			0
Scn1a	48	2295	4	9	TSeries-05312019-1217-095	4p_100	4	100	33	0			0
Scn1a	48	2295	4	9	TSeries-05312019-1217-095	4p_100	4	100	34	0			0
Scn1a	48	2295	4	9	TSeries-05312019-1217-095	4p_100	4	100	35	0			0
Scn1a	48	2295	4	9	TSeries-05312019-1217-095	4p_100	4	100	36	1	0.366771		1	0.366771	1
Scn1a	48	2295	4	9	TSeries-05312019-1217-095	4p_100	4	100	37	0			0
Scn1a	48	2295	4	9	TSeries-05312019-1217-095	4p_100	4	100	38	0			0
Scn1a	48	2295	4	9	TSeries-05312019-1217-095	4p_100	4	100	39	0			0
Scn1a	48	2295	4	9	TSeries-05312019-1217-095	4p_100	4	100	40	0			0
Scn1a	48	2295	4	9	TSeries-05312019-1217-095	4p_100	4	100	41	0			0
Scn1a	48	2295	4	9	TSeries-05312019-1217-095	4p_100	4	100	42	0			0
Scn1a	48	2295	4	9	TSeries-05312019-1217-095	4p_100	4	100	43	0			0
Scn1a	48	2295	4	9	TSeries-05312019-1217-095	4p_100	4	100	44	0			0
Scn1a	48	2295	4	9	TSeries-05312019-1217-095	4p_100	4	100	45	0			0
Scn1a	48	2295	4	9	TSeries-05312019-1217-095	4p_100	4	100	46	0			0
Scn1a	48	2295	4	9	TSeries-05312019-1217-095	4p_100	4	100	47	0			0
Scn1a	48	2295	4	9	TSeries-05312019-1217-095	4p_100	4	100	48	0			0
Scn1a	48	2295	4	9	TSeries-05312019-1217-095	4p_100	4	100	49	0			0
Scn1a	48	2295	4	9	TSeries-05312019-1217-095	4p_100	4	100	50	0			0
Scn1a	48	2295	4	9	TSeries-05312019-1217-095	4p_100	4	100	51	0			0
Scn1a	48	2295	4	9	TSeries-05312019-1217-095	4p_100	4	100	52	0			0
Scn1a	48	2295	4	9	TSeries-05312019-1217-095	4p_100	4	100	53	0			0
Scn1a	48	2295	4	9	TSeries-05312019-1217-095	4p_100	4	100	54	0			0
Scn1a	48	2295	4	9	TSeries-05312019-1217-095	4p_100	4	100	55	0			0
Scn1a	48	2295	4	9	TSeries-05312019-1217-095	4p_100	4	100	56	0			0
Scn1a	48	2295	4	9	TSeries-05312019-1217-095	4p_100	4	100	57	0			0
Scn1a	48	2295	4	9	TSeries-05312019-1217-095	4p_100	4	100	58	0			0
Scn1a	48	2295	4	9	TSeries-05312019-1217-096	1p_500	1	500	0	0			0
Scn1a	48	2295	4	9	TSeries-05312019-1217-096	1p_500	1	500	1	0			0
Scn1a	48	2295	4	9	TSeries-05312019-1217-096	1p_500	1	500	2	0			0
Scn1a	48	2295	4	9	TSeries-05312019-1217-096	1p_500	1	500	3	1	1.44661		1	1.44661	2
Scn1a	48	2295	4	9	TSeries-05312019-1217-096	1p_500	1	500	4	1	0.408605		1	0.408605	1
Scn1a	48	2295	4	9	TSeries-05312019-1217-096	1p_500	1	500	5	0			0
Scn1a	48	2295	4	9	TSeries-05312019-1217-096	1p_500	1	500	6	0			0
Scn1a	48	2295	4	9	TSeries-05312019-1217-096	1p_500	1	500	7	0			0
Scn1a	48	2295	4	9	TSeries-05312019-1217-096	1p_500	1	500	8	0			0
Scn1a	48	2295	4	9	TSeries-05312019-1217-096	1p_500	1	500	9	0			0
Scn1a	48	2295	4	9	TSeries-05312019-1217-096	1p_500	1	500	10	0			0
Scn1a	48	2295	4	9	TSeries-05312019-1217-096	1p_500	1	500	11	1	1.33615		1	1.33615	2
Scn1a	48	2295	4	9	TSeries-05312019-1217-096	1p_500	1	500	12	0			0
Scn1a	48	2295	4	9	TSeries-05312019-1217-096	1p_500	1	500	13	0			0
Scn1a	48	2295	4	9	TSeries-05312019-1217-096	1p_500	1	500	14	0			0
Scn1a	48	2295	4	9	TSeries-05312019-1217-096	1p_500	1	500	15	0			0
Scn1a	48	2295	4	9	TSeries-05312019-1217-096	1p_500	1	500	16	1	0.820736		1	0.820736	2
Scn1a	48	2295	4	9	TSeries-05312019-1217-096	1p_500	1	500	17	0			0
Scn1a	48	2295	4	9	TSeries-05312019-1217-096	1p_500	1	500	18	1	0.341539		1	0.341539	1
Scn1a	48	2295	4	9	TSeries-05312019-1217-096	1p_500	1	500	19	0			0
Scn1a	48	2295	4	9	TSeries-05312019-1217-096	1p_500	1	500	20	0			0
Scn1a	48	2295	4	9	TSeries-05312019-1217-096	1p_500	1	500	21	0			0
Scn1a	48	2295	4	9	TSeries-05312019-1217-096	1p_500	1	500	22	0			0
Scn1a	48	2295	4	9	TSeries-05312019-1217-096	1p_500	1	500	23	1	1.69254		1	1.69254	2
Scn1a	48	2295	4	9	TSeries-05312019-1217-096	1p_500	1	500	24	1	1.48576		1	1.48576	2
Scn1a	48	2295	4	9	TSeries-05312019-1217-096	1p_500	1	500	25	0			0
Scn1a	48	2295	4	9	TSeries-05312019-1217-096	1p_500	1	500	26	0			0
Scn1a	48	2295	4	9	TSeries-05312019-1217-096	1p_500	1	500	27	0			0
Scn1a	48	2295	4	9	TSeries-05312019-1217-096	1p_500	1	500	28	1	0.362575		1	0.362575	1
Scn1a	48	2295	4	9	TSeries-05312019-1217-096	1p_500	1	500	29	1	1.29466		0
Scn1a	48	2295	4	9	TSeries-05312019-1217-096	1p_500	1	500	30	0			0
Scn1a	48	2295	4	9	TSeries-05312019-1217-096	1p_500	1	500	31	0			0
Scn1a	48	2295	4	9	TSeries-05312019-1217-096	1p_500	1	500	32	1	0.934425		1	0.934425	2
Scn1a	48	2295	4	9	TSeries-05312019-1217-096	1p_500	1	500	33	1	1.55266		1	1.55266	2
Scn1a	48	2295	4	9	TSeries-05312019-1217-096	1p_500	1	500	34	1	1.26931		1	1.26931	2
Scn1a	48	2295	4	9	TSeries-05312019-1217-096	1p_500	1	500	35	1	0.206381		1	0.206381	1
Scn1a	48	2295	4	9	TSeries-05312019-1217-096	1p_500	1	500	36	1	1.08247		1	1.08247	1
Scn1a	48	2295	4	9	TSeries-05312019-1217-096	1p_500	1	500	37	1	0.387447		1	0.387447	1
Scn1a	48	2295	4	9	TSeries-05312019-1217-096	1p_500	1	500	38	0			0
Scn1a	48	2295	4	9	TSeries-05312019-1217-096	1p_500	1	500	39	1	2.27783		1	2.27783	3
Scn1a	48	2295	4	9	TSeries-05312019-1217-096	1p_500	1	500	40	1	1.17308		1	1.17308	1
Scn1a	48	2295	4	9	TSeries-05312019-1217-096	1p_500	1	500	41	0			0
Scn1a	48	2295	4	9	TSeries-05312019-1217-096	1p_500	1	500	42	0			0
Scn1a	48	2295	4	9	TSeries-05312019-1217-096	1p_500	1	500	43	0			0
Scn1a	48	2295	4	9	TSeries-05312019-1217-096	1p_500	1	500	44	0			0
Scn1a	48	2295	4	9	TSeries-05312019-1217-096	1p_500	1	500	45	1	0.719168		1	0.719168	1
Scn1a	48	2295	4	9	TSeries-05312019-1217-096	1p_500	1	500	46	1	0.272662		1	0.272662	1
Scn1a	48	2295	4	9	TSeries-05312019-1217-096	1p_500	1	500	47	1	0.164458		1	0.164458	1
Scn1a	48	2295	4	9	TSeries-05312019-1217-096	1p_500	1	500	48	0			0
Scn1a	48	2295	4	9	TSeries-05312019-1217-096	1p_500	1	500	49	0			0
Scn1a	48	2295	4	9	TSeries-05312019-1217-096	1p_500	1	500	50	0			0
Scn1a	48	2295	4	9	TSeries-05312019-1217-096	1p_500	1	500	51	1	0.234832		1	0.234832	1
Scn1a	48	2295	4	9	TSeries-05312019-1217-096	1p_500	1	500	52	0			0
Scn1a	48	2295	4	9	TSeries-05312019-1217-096	1p_500	1	500	53	0			0
Scn1a	48	2295	4	9	TSeries-05312019-1217-096	1p_500	1	500	54	0			0
Scn1a	48	2295	4	9	TSeries-05312019-1217-096	1p_500	1	500	55	0			0
Scn1a	48	2295	4	9	TSeries-05312019-1217-096	1p_500	1	500	56	0			0
Scn1a	48	2295	4	9	TSeries-05312019-1217-096	1p_500	1	500	57	1	0.310891		1	0.310891	1
Scn1a	48	2295	4	9	TSeries-05312019-1217-096	1p_500	1	500	58	0			0
Scn1a	48	2295	4	9	TSeries-05312019-1217-097	1p_400	1	400	0	0			0
Scn1a	48	2295	4	9	TSeries-05312019-1217-097	1p_400	1	400	1	0			0
Scn1a	48	2295	4	9	TSeries-05312019-1217-097	1p_400	1	400	2	0			0
Scn1a	48	2295	4	9	TSeries-05312019-1217-097	1p_400	1	400	3	1	1.34605		1	1.34605	2
Scn1a	48	2295	4	9	TSeries-05312019-1217-097	1p_400	1	400	4	1	0.464751		1	0.464751	1
Scn1a	48	2295	4	9	TSeries-05312019-1217-097	1p_400	1	400	5	0			0
Scn1a	48	2295	4	9	TSeries-05312019-1217-097	1p_400	1	400	6	0			0
Scn1a	48	2295	4	9	TSeries-05312019-1217-097	1p_400	1	400	7	1	1.28544		1	1.28544	2
Scn1a	48	2295	4	9	TSeries-05312019-1217-097	1p_400	1	400	8	0			0
Scn1a	48	2295	4	9	TSeries-05312019-1217-097	1p_400	1	400	9	0			0
Scn1a	48	2295	4	9	TSeries-05312019-1217-097	1p_400	1	400	10	0			0
Scn1a	48	2295	4	9	TSeries-05312019-1217-097	1p_400	1	400	11	1	1.35277		1	1.35277	2
Scn1a	48	2295	4	9	TSeries-05312019-1217-097	1p_400	1	400	12	0			0
Scn1a	48	2295	4	9	TSeries-05312019-1217-097	1p_400	1	400	13	0			0
Scn1a	48	2295	4	9	TSeries-05312019-1217-097	1p_400	1	400	14	0			0
Scn1a	48	2295	4	9	TSeries-05312019-1217-097	1p_400	1	400	15	0			0
Scn1a	48	2295	4	9	TSeries-05312019-1217-097	1p_400	1	400	16	0			0
Scn1a	48	2295	4	9	TSeries-05312019-1217-097	1p_400	1	400	17	0			0
Scn1a	48	2295	4	9	TSeries-05312019-1217-097	1p_400	1	400	18	0			0
Scn1a	48	2295	4	9	TSeries-05312019-1217-097	1p_400	1	400	19	0			0
Scn1a	48	2295	4	9	TSeries-05312019-1217-097	1p_400	1	400	20	0			0
Scn1a	48	2295	4	9	TSeries-05312019-1217-097	1p_400	1	400	21	0			0
Scn1a	48	2295	4	9	TSeries-05312019-1217-097	1p_400	1	400	22	0			0
Scn1a	48	2295	4	9	TSeries-05312019-1217-097	1p_400	1	400	23	1	1.65933		1	1.65933	3
Scn1a	48	2295	4	9	TSeries-05312019-1217-097	1p_400	1	400	24	1	1.53735		1	1.53735	3
Scn1a	48	2295	4	9	TSeries-05312019-1217-097	1p_400	1	400	25	1	1.38408		1	1.38408	2
Scn1a	48	2295	4	9	TSeries-05312019-1217-097	1p_400	1	400	26	0			0
Scn1a	48	2295	4	9	TSeries-05312019-1217-097	1p_400	1	400	27	0			0
Scn1a	48	2295	4	9	TSeries-05312019-1217-097	1p_400	1	400	28	1	0.426884		1	0.426884	1
Scn1a	48	2295	4	9	TSeries-05312019-1217-097	1p_400	1	400	29	0			0
Scn1a	48	2295	4	9	TSeries-05312019-1217-097	1p_400	1	400	30	0			0
Scn1a	48	2295	4	9	TSeries-05312019-1217-097	1p_400	1	400	31	1	0.222656		1	0.222656	1
Scn1a	48	2295	4	9	TSeries-05312019-1217-097	1p_400	1	400	32	0			0
Scn1a	48	2295	4	9	TSeries-05312019-1217-097	1p_400	1	400	33	0			0
Scn1a	48	2295	4	9	TSeries-05312019-1217-097	1p_400	1	400	34	1	1.76401		1	1.76401	3
Scn1a	48	2295	4	9	TSeries-05312019-1217-097	1p_400	1	400	35	0			0
Scn1a	48	2295	4	9	TSeries-05312019-1217-097	1p_400	1	400	36	1	0.908686		1	0.908686	2
Scn1a	48	2295	4	9	TSeries-05312019-1217-097	1p_400	1	400	37	1	2.83735		1	2.83735	3
Scn1a	48	2295	4	9	TSeries-05312019-1217-097	1p_400	1	400	38	0			0
Scn1a	48	2295	4	9	TSeries-05312019-1217-097	1p_400	1	400	39	1	2.08448		1	2.08448	3
Scn1a	48	2295	4	9	TSeries-05312019-1217-097	1p_400	1	400	40	0			0
Scn1a	48	2295	4	9	TSeries-05312019-1217-097	1p_400	1	400	41	0			0
Scn1a	48	2295	4	9	TSeries-05312019-1217-097	1p_400	1	400	42	0			0
Scn1a	48	2295	4	9	TSeries-05312019-1217-097	1p_400	1	400	43	0			0
Scn1a	48	2295	4	9	TSeries-05312019-1217-097	1p_400	1	400	44	0			0
Scn1a	48	2295	4	9	TSeries-05312019-1217-097	1p_400	1	400	45	0			0
Scn1a	48	2295	4	9	TSeries-05312019-1217-097	1p_400	1	400	46	0			0
Scn1a	48	2295	4	9	TSeries-05312019-1217-097	1p_400	1	400	47	0			0
Scn1a	48	2295	4	9	TSeries-05312019-1217-097	1p_400	1	400	48	0			0
Scn1a	48	2295	4	9	TSeries-05312019-1217-097	1p_400	1	400	49	1	0.223646		0
Scn1a	48	2295	4	9	TSeries-05312019-1217-097	1p_400	1	400	50	0			0
Scn1a	48	2295	4	9	TSeries-05312019-1217-097	1p_400	1	400	51	0			0
Scn1a	48	2295	4	9	TSeries-05312019-1217-097	1p_400	1	400	52	0			0
Scn1a	48	2295	4	9	TSeries-05312019-1217-097	1p_400	1	400	53	0			0
Scn1a	48	2295	4	9	TSeries-05312019-1217-097	1p_400	1	400	54	0			0
Scn1a	48	2295	4	9	TSeries-05312019-1217-097	1p_400	1	400	55	0			0
Scn1a	48	2295	4	9	TSeries-05312019-1217-097	1p_400	1	400	56	0			0
Scn1a	48	2295	4	9	TSeries-05312019-1217-097	1p_400	1	400	57	0			0
Scn1a	48	2295	4	9	TSeries-05312019-1217-097	1p_400	1	400	58	0			0
Scn1a	48	2295	4	9	TSeries-05312019-1217-098	1p_300	1	300	0	0			0
Scn1a	48	2295	4	9	TSeries-05312019-1217-098	1p_300	1	300	1	0			0
Scn1a	48	2295	4	9	TSeries-05312019-1217-098	1p_300	1	300	2	0			0
Scn1a	48	2295	4	9	TSeries-05312019-1217-098	1p_300	1	300	3	1	1.41597		1	1.41597	2
Scn1a	48	2295	4	9	TSeries-05312019-1217-098	1p_300	1	300	4	1	0.487302		1	0.487302	1
Scn1a	48	2295	4	9	TSeries-05312019-1217-098	1p_300	1	300	5	0			0
Scn1a	48	2295	4	9	TSeries-05312019-1217-098	1p_300	1	300	6	0			0
Scn1a	48	2295	4	9	TSeries-05312019-1217-098	1p_300	1	300	7	0			0
Scn1a	48	2295	4	9	TSeries-05312019-1217-098	1p_300	1	300	8	0			0
Scn1a	48	2295	4	9	TSeries-05312019-1217-098	1p_300	1	300	9	0			0
Scn1a	48	2295	4	9	TSeries-05312019-1217-098	1p_300	1	300	10	0			0
Scn1a	48	2295	4	9	TSeries-05312019-1217-098	1p_300	1	300	11	1	1.26918		1	1.26918	2
Scn1a	48	2295	4	9	TSeries-05312019-1217-098	1p_300	1	300	12	1	0.415449		1	0.415449	2
Scn1a	48	2295	4	9	TSeries-05312019-1217-098	1p_300	1	300	13	0			0
Scn1a	48	2295	4	9	TSeries-05312019-1217-098	1p_300	1	300	14	0			0
Scn1a	48	2295	4	9	TSeries-05312019-1217-098	1p_300	1	300	15	0			0
Scn1a	48	2295	4	9	TSeries-05312019-1217-098	1p_300	1	300	16	0			0
Scn1a	48	2295	4	9	TSeries-05312019-1217-098	1p_300	1	300	17	0			0
Scn1a	48	2295	4	9	TSeries-05312019-1217-098	1p_300	1	300	18	0			0
Scn1a	48	2295	4	9	TSeries-05312019-1217-098	1p_300	1	300	19	0			0
Scn1a	48	2295	4	9	TSeries-05312019-1217-098	1p_300	1	300	20	0			0
Scn1a	48	2295	4	9	TSeries-05312019-1217-098	1p_300	1	300	21	0			0
Scn1a	48	2295	4	9	TSeries-05312019-1217-098	1p_300	1	300	22	0			0
Scn1a	48	2295	4	9	TSeries-05312019-1217-098	1p_300	1	300	23	1	1.52861		1	1.52861	2
Scn1a	48	2295	4	9	TSeries-05312019-1217-098	1p_300	1	300	24	1	1.45334		1	1.45334	2
Scn1a	48	2295	4	9	TSeries-05312019-1217-098	1p_300	1	300	25	0			0
Scn1a	48	2295	4	9	TSeries-05312019-1217-098	1p_300	1	300	26	0			0
Scn1a	48	2295	4	9	TSeries-05312019-1217-098	1p_300	1	300	27	0			0
Scn1a	48	2295	4	9	TSeries-05312019-1217-098	1p_300	1	300	28	0			0
Scn1a	48	2295	4	9	TSeries-05312019-1217-098	1p_300	1	300	29	0			0
Scn1a	48	2295	4	9	TSeries-05312019-1217-098	1p_300	1	300	30	0			0
Scn1a	48	2295	4	9	TSeries-05312019-1217-098	1p_300	1	300	31	0			0
Scn1a	48	2295	4	9	TSeries-05312019-1217-098	1p_300	1	300	32	0			0
Scn1a	48	2295	4	9	TSeries-05312019-1217-098	1p_300	1	300	33	0			0
Scn1a	48	2295	4	9	TSeries-05312019-1217-098	1p_300	1	300	34	1	1.66938		1	1.66938	3
Scn1a	48	2295	4	9	TSeries-05312019-1217-098	1p_300	1	300	35	0			0
Scn1a	48	2295	4	9	TSeries-05312019-1217-098	1p_300	1	300	36	0			0
Scn1a	48	2295	4	9	TSeries-05312019-1217-098	1p_300	1	300	37	1	0.142991		1	0.142991	1
Scn1a	48	2295	4	9	TSeries-05312019-1217-098	1p_300	1	300	38	0			0
Scn1a	48	2295	4	9	TSeries-05312019-1217-098	1p_300	1	300	39	1	1.6088		1	1.6088	2
Scn1a	48	2295	4	9	TSeries-05312019-1217-098	1p_300	1	300	40	0			0
Scn1a	48	2295	4	9	TSeries-05312019-1217-098	1p_300	1	300	41	0			0
Scn1a	48	2295	4	9	TSeries-05312019-1217-098	1p_300	1	300	42	0			0
Scn1a	48	2295	4	9	TSeries-05312019-1217-098	1p_300	1	300	43	0			0
Scn1a	48	2295	4	9	TSeries-05312019-1217-098	1p_300	1	300	44	0			0
Scn1a	48	2295	4	9	TSeries-05312019-1217-098	1p_300	1	300	45	0			0
Scn1a	48	2295	4	9	TSeries-05312019-1217-098	1p_300	1	300	46	0			0
Scn1a	48	2295	4	9	TSeries-05312019-1217-098	1p_300	1	300	47	0			0
Scn1a	48	2295	4	9	TSeries-05312019-1217-098	1p_300	1	300	48	0			0
Scn1a	48	2295	4	9	TSeries-05312019-1217-098	1p_300	1	300	49	0			0
Scn1a	48	2295	4	9	TSeries-05312019-1217-098	1p_300	1	300	50	0			0
Scn1a	48	2295	4	9	TSeries-05312019-1217-098	1p_300	1	300	51	0			0
Scn1a	48	2295	4	9	TSeries-05312019-1217-098	1p_300	1	300	52	0			0
Scn1a	48	2295	4	9	TSeries-05312019-1217-098	1p_300	1	300	53	0			0
Scn1a	48	2295	4	9	TSeries-05312019-1217-098	1p_300	1	300	54	0			0
Scn1a	48	2295	4	9	TSeries-05312019-1217-098	1p_300	1	300	55	0			0
Scn1a	48	2295	4	9	TSeries-05312019-1217-098	1p_300	1	300	56	0			0
Scn1a	48	2295	4	9	TSeries-05312019-1217-098	1p_300	1	300	57	0			0
Scn1a	48	2295	4	9	TSeries-05312019-1217-098	1p_300	1	300	58	0			0
Scn1a	48	2295	4	9	TSeries-05312019-1217-099	1p_200	1	200	0	0			0
Scn1a	48	2295	4	9	TSeries-05312019-1217-099	1p_200	1	200	1	0			0
Scn1a	48	2295	4	9	TSeries-05312019-1217-099	1p_200	1	200	2	0			0
Scn1a	48	2295	4	9	TSeries-05312019-1217-099	1p_200	1	200	3	0			0
Scn1a	48	2295	4	9	TSeries-05312019-1217-099	1p_200	1	200	4	0			0
Scn1a	48	2295	4	9	TSeries-05312019-1217-099	1p_200	1	200	5	0			0
Scn1a	48	2295	4	9	TSeries-05312019-1217-099	1p_200	1	200	6	0			0
Scn1a	48	2295	4	9	TSeries-05312019-1217-099	1p_200	1	200	7	0			0
Scn1a	48	2295	4	9	TSeries-05312019-1217-099	1p_200	1	200	8	0			0
Scn1a	48	2295	4	9	TSeries-05312019-1217-099	1p_200	1	200	9	0			0
Scn1a	48	2295	4	9	TSeries-05312019-1217-099	1p_200	1	200	10	0			0
Scn1a	48	2295	4	9	TSeries-05312019-1217-099	1p_200	1	200	11	1	1.13545		1	1.13545	2
Scn1a	48	2295	4	9	TSeries-05312019-1217-099	1p_200	1	200	12	0			0
Scn1a	48	2295	4	9	TSeries-05312019-1217-099	1p_200	1	200	13	0			0
Scn1a	48	2295	4	9	TSeries-05312019-1217-099	1p_200	1	200	14	0			0
Scn1a	48	2295	4	9	TSeries-05312019-1217-099	1p_200	1	200	15	0			0
Scn1a	48	2295	4	9	TSeries-05312019-1217-099	1p_200	1	200	16	0			0
Scn1a	48	2295	4	9	TSeries-05312019-1217-099	1p_200	1	200	17	0			0
Scn1a	48	2295	4	9	TSeries-05312019-1217-099	1p_200	1	200	18	0			0
Scn1a	48	2295	4	9	TSeries-05312019-1217-099	1p_200	1	200	19	0			0
Scn1a	48	2295	4	9	TSeries-05312019-1217-099	1p_200	1	200	20	0			0
Scn1a	48	2295	4	9	TSeries-05312019-1217-099	1p_200	1	200	21	0			0
Scn1a	48	2295	4	9	TSeries-05312019-1217-099	1p_200	1	200	22	0			0
Scn1a	48	2295	4	9	TSeries-05312019-1217-099	1p_200	1	200	23	0			0
Scn1a	48	2295	4	9	TSeries-05312019-1217-099	1p_200	1	200	24	1	1.40463		1	1.40463	2
Scn1a	48	2295	4	9	TSeries-05312019-1217-099	1p_200	1	200	25	0			0
Scn1a	48	2295	4	9	TSeries-05312019-1217-099	1p_200	1	200	26	0			0
Scn1a	48	2295	4	9	TSeries-05312019-1217-099	1p_200	1	200	27	0			0
Scn1a	48	2295	4	9	TSeries-05312019-1217-099	1p_200	1	200	28	0			0
Scn1a	48	2295	4	9	TSeries-05312019-1217-099	1p_200	1	200	29	0			0
Scn1a	48	2295	4	9	TSeries-05312019-1217-099	1p_200	1	200	30	0			0
Scn1a	48	2295	4	9	TSeries-05312019-1217-099	1p_200	1	200	31	0			0
Scn1a	48	2295	4	9	TSeries-05312019-1217-099	1p_200	1	200	32	0			0
Scn1a	48	2295	4	9	TSeries-05312019-1217-099	1p_200	1	200	33	0			0
Scn1a	48	2295	4	9	TSeries-05312019-1217-099	1p_200	1	200	34	0			0
Scn1a	48	2295	4	9	TSeries-05312019-1217-099	1p_200	1	200	35	0			0
Scn1a	48	2295	4	9	TSeries-05312019-1217-099	1p_200	1	200	36	1	0.398954		1	0.398954	1
Scn1a	48	2295	4	9	TSeries-05312019-1217-099	1p_200	1	200	37	0			0
Scn1a	48	2295	4	9	TSeries-05312019-1217-099	1p_200	1	200	38	0			0
Scn1a	48	2295	4	9	TSeries-05312019-1217-099	1p_200	1	200	39	0			0
Scn1a	48	2295	4	9	TSeries-05312019-1217-099	1p_200	1	200	40	1	0.203243		1	0.203243	1
Scn1a	48	2295	4	9	TSeries-05312019-1217-099	1p_200	1	200	41	0			0
Scn1a	48	2295	4	9	TSeries-05312019-1217-099	1p_200	1	200	42	0			0
Scn1a	48	2295	4	9	TSeries-05312019-1217-099	1p_200	1	200	43	0			0
Scn1a	48	2295	4	9	TSeries-05312019-1217-099	1p_200	1	200	44	0			0
Scn1a	48	2295	4	9	TSeries-05312019-1217-099	1p_200	1	200	45	0			0
Scn1a	48	2295	4	9	TSeries-05312019-1217-099	1p_200	1	200	46	0			0
Scn1a	48	2295	4	9	TSeries-05312019-1217-099	1p_200	1	200	47	0			0
Scn1a	48	2295	4	9	TSeries-05312019-1217-099	1p_200	1	200	48	0			0
Scn1a	48	2295	4	9	TSeries-05312019-1217-099	1p_200	1	200	49	0			0
Scn1a	48	2295	4	9	TSeries-05312019-1217-099	1p_200	1	200	50	0			0
Scn1a	48	2295	4	9	TSeries-05312019-1217-099	1p_200	1	200	51	0			0
Scn1a	48	2295	4	9	TSeries-05312019-1217-099	1p_200	1	200	52	0			0
Scn1a	48	2295	4	9	TSeries-05312019-1217-099	1p_200	1	200	53	0			0
Scn1a	48	2295	4	9	TSeries-05312019-1217-099	1p_200	1	200	54	0			0
Scn1a	48	2295	4	9	TSeries-05312019-1217-099	1p_200	1	200	55	0			0
Scn1a	48	2295	4	9	TSeries-05312019-1217-099	1p_200	1	200	56	0			0
Scn1a	48	2295	4	9	TSeries-05312019-1217-099	1p_200	1	200	57	0			0
Scn1a	48	2295	4	9	TSeries-05312019-1217-099	1p_200	1	200	58	0			0
Scn1a	48	2295	4	9	TSeries-05312019-1217-100	1p_100	1	100	0	0			0
Scn1a	48	2295	4	9	TSeries-05312019-1217-100	1p_100	1	100	1	0			0
Scn1a	48	2295	4	9	TSeries-05312019-1217-100	1p_100	1	100	2	0			0
Scn1a	48	2295	4	9	TSeries-05312019-1217-100	1p_100	1	100	3	0			0
Scn1a	48	2295	4	9	TSeries-05312019-1217-100	1p_100	1	100	4	0			0
Scn1a	48	2295	4	9	TSeries-05312019-1217-100	1p_100	1	100	5	0			0
Scn1a	48	2295	4	9	TSeries-05312019-1217-100	1p_100	1	100	6	0			0
Scn1a	48	2295	4	9	TSeries-05312019-1217-100	1p_100	1	100	7	0			0
Scn1a	48	2295	4	9	TSeries-05312019-1217-100	1p_100	1	100	8	0			0
Scn1a	48	2295	4	9	TSeries-05312019-1217-100	1p_100	1	100	9	0			0
Scn1a	48	2295	4	9	TSeries-05312019-1217-100	1p_100	1	100	10	0			0
Scn1a	48	2295	4	9	TSeries-05312019-1217-100	1p_100	1	100	11	1	1.08453		1	1.08453	3
Scn1a	48	2295	4	9	TSeries-05312019-1217-100	1p_100	1	100	12	0			0
Scn1a	48	2295	4	9	TSeries-05312019-1217-100	1p_100	1	100	13	0			0
Scn1a	48	2295	4	9	TSeries-05312019-1217-100	1p_100	1	100	14	0			0
Scn1a	48	2295	4	9	TSeries-05312019-1217-100	1p_100	1	100	15	0			0
Scn1a	48	2295	4	9	TSeries-05312019-1217-100	1p_100	1	100	16	0			0
Scn1a	48	2295	4	9	TSeries-05312019-1217-100	1p_100	1	100	17	0			0
Scn1a	48	2295	4	9	TSeries-05312019-1217-100	1p_100	1	100	18	0			0
Scn1a	48	2295	4	9	TSeries-05312019-1217-100	1p_100	1	100	19	0			0
Scn1a	48	2295	4	9	TSeries-05312019-1217-100	1p_100	1	100	20	0			0
Scn1a	48	2295	4	9	TSeries-05312019-1217-100	1p_100	1	100	21	0			0
Scn1a	48	2295	4	9	TSeries-05312019-1217-100	1p_100	1	100	22	0			0
Scn1a	48	2295	4	9	TSeries-05312019-1217-100	1p_100	1	100	23	0			0
Scn1a	48	2295	4	9	TSeries-05312019-1217-100	1p_100	1	100	24	0			0
Scn1a	48	2295	4	9	TSeries-05312019-1217-100	1p_100	1	100	25	0			0
Scn1a	48	2295	4	9	TSeries-05312019-1217-100	1p_100	1	100	26	0			0
Scn1a	48	2295	4	9	TSeries-05312019-1217-100	1p_100	1	100	27	0			0
Scn1a	48	2295	4	9	TSeries-05312019-1217-100	1p_100	1	100	28	0			0
Scn1a	48	2295	4	9	TSeries-05312019-1217-100	1p_100	1	100	29	0			0
Scn1a	48	2295	4	9	TSeries-05312019-1217-100	1p_100	1	100	30	0			0
Scn1a	48	2295	4	9	TSeries-05312019-1217-100	1p_100	1	100	31	0			0
Scn1a	48	2295	4	9	TSeries-05312019-1217-100	1p_100	1	100	32	0			0
Scn1a	48	2295	4	9	TSeries-05312019-1217-100	1p_100	1	100	33	0			0
Scn1a	48	2295	4	9	TSeries-05312019-1217-100	1p_100	1	100	34	0			0
Scn1a	48	2295	4	9	TSeries-05312019-1217-100	1p_100	1	100	35	0			0
Scn1a	48	2295	4	9	TSeries-05312019-1217-100	1p_100	1	100	36	0			0
Scn1a	48	2295	4	9	TSeries-05312019-1217-100	1p_100	1	100	37	0			0
Scn1a	48	2295	4	9	TSeries-05312019-1217-100	1p_100	1	100	38	0			0
Scn1a	48	2295	4	9	TSeries-05312019-1217-100	1p_100	1	100	39	0			0
Scn1a	48	2295	4	9	TSeries-05312019-1217-100	1p_100	1	100	40	0			0
Scn1a	48	2295	4	9	TSeries-05312019-1217-100	1p_100	1	100	41	0			0
Scn1a	48	2295	4	9	TSeries-05312019-1217-100	1p_100	1	100	42	0			0
Scn1a	48	2295	4	9	TSeries-05312019-1217-100	1p_100	1	100	43	0			0
Scn1a	48	2295	4	9	TSeries-05312019-1217-100	1p_100	1	100	44	0			0
Scn1a	48	2295	4	9	TSeries-05312019-1217-100	1p_100	1	100	45	0			0
Scn1a	48	2295	4	9	TSeries-05312019-1217-100	1p_100	1	100	46	0			0
Scn1a	48	2295	4	9	TSeries-05312019-1217-100	1p_100	1	100	47	0			0
Scn1a	48	2295	4	9	TSeries-05312019-1217-100	1p_100	1	100	48	0			0
Scn1a	48	2295	4	9	TSeries-05312019-1217-100	1p_100	1	100	49	0			0
Scn1a	48	2295	4	9	TSeries-05312019-1217-100	1p_100	1	100	50	0			0
Scn1a	48	2295	4	9	TSeries-05312019-1217-100	1p_100	1	100	51	0			0
Scn1a	48	2295	4	9	TSeries-05312019-1217-100	1p_100	1	100	52	0			0
Scn1a	48	2295	4	9	TSeries-05312019-1217-100	1p_100	1	100	53	0			0
Scn1a	48	2295	4	9	TSeries-05312019-1217-100	1p_100	1	100	54	0			0
Scn1a	48	2295	4	9	TSeries-05312019-1217-100	1p_100	1	100	55	0			0
Scn1a	48	2295	4	9	TSeries-05312019-1217-100	1p_100	1	100	56	0			0
Scn1a	48	2295	4	9	TSeries-05312019-1217-100	1p_100	1	100	57	0			0
Scn1a	48	2295	4	9	TSeries-05312019-1217-100	1p_100	1	100	58	0			0
WT	71	2517	1	1	TSeries-08072019-1155-001	4p_500	4	500	0	1	0.207296	152.507	1	0.207296	1
WT	71	2517	1	1	TSeries-08072019-1155-001	4p_500	4	500	1	0		127.905	0
WT	71	2517	1	1	TSeries-08072019-1155-001	4p_500	4	500	2	0		160.28	0
WT	71	2517	1	1	TSeries-08072019-1155-001	4p_500	4	500	3	0		159.16	0
WT	71	2517	1	1	TSeries-08072019-1155-001	4p_500	4	500	4	0		140.457	0
WT	71	2517	1	1	TSeries-08072019-1155-001	4p_500	4	500	5	0		137.96	0
WT	71	2517	1	1	TSeries-08072019-1155-001	4p_500	4	500	6	0		183.733	0
WT	71	2517	1	1	TSeries-08072019-1155-001	4p_500	4	500	7	0		151.347	0
WT	71	2517	1	1	TSeries-08072019-1155-001	4p_500	4	500	8	0		126.613	0
WT	71	2517	1	1	TSeries-08072019-1155-001	4p_500	4	500	9	0		95.7373	0
WT	71	2517	1	1	TSeries-08072019-1155-001	4p_500	4	500	10	0		84.3594	0
WT	71	2517	1	1	TSeries-08072019-1155-001	4p_500	4	500	11	0		82.0713	0
WT	71	2517	1	1	TSeries-08072019-1155-001	4p_500	4	500	12	0		97.0887	0
WT	71	2517	1	1	TSeries-08072019-1155-001	4p_500	4	500	13	0		97.4237	0
WT	71	2517	1	1	TSeries-08072019-1155-001	4p_500	4	500	14	0		76.8846	0
WT	71	2517	1	1	TSeries-08072019-1155-001	4p_500	4	500	15	0		69.3145	0
WT	71	2517	1	1	TSeries-08072019-1155-001	4p_500	4	500	16	0		101.997	0
WT	71	2517	1	1	TSeries-08072019-1155-001	4p_500	4	500	17	1	0.41342	129.499	1	0.41342	2
WT	71	2517	1	1	TSeries-08072019-1155-001	4p_500	4	500	18	0		175.918	0
WT	71	2517	1	1	TSeries-08072019-1155-001	4p_500	4	500	19	1	1.35248	177.539	1	1.35248	2
WT	71	2517	1	1	TSeries-08072019-1155-001	4p_500	4	500	20	0		146.728	0
WT	71	2517	1	1	TSeries-08072019-1155-001	4p_500	4	500	21	0		142.799	0
WT	71	2517	1	1	TSeries-08072019-1155-001	4p_500	4	500	22	0		115.248	0
WT	71	2517	1	1	TSeries-08072019-1155-001	4p_500	4	500	23	1	0.490438	83.7289	1	0.490438	1
WT	71	2517	1	1	TSeries-08072019-1155-001	4p_500	4	500	24	0		55.939	0
WT	71	2517	1	1	TSeries-08072019-1155-001	4p_500	4	500	25	0		31.8576	0
WT	71	2517	1	1	TSeries-08072019-1155-001	4p_500	4	500	26	0		23.9134	0
WT	71	2517	1	1	TSeries-08072019-1155-001	4p_500	4	500	27	0		24.3713	0
WT	71	2517	1	1	TSeries-08072019-1155-001	4p_500	4	500	28	0		47.417	0
WT	71	2517	1	1	TSeries-08072019-1155-001	4p_500	4	500	29	0		59.7237	0
WT	71	2517	1	1	TSeries-08072019-1155-001	4p_500	4	500	30	0		49.4231	0
WT	71	2517	1	1	TSeries-08072019-1155-001	4p_500	4	500	31	0		126.451	0
WT	71	2517	1	1	TSeries-08072019-1155-001	4p_500	4	500	32	1	0.837653	107.181	1	0.837653	2
WT	71	2517	1	1	TSeries-08072019-1155-001	4p_500	4	500	33	1	0.660793	175.516	1	0.660793	1
WT	71	2517	1	1	TSeries-08072019-1155-001	4p_500	4	500	34	1	0.598837	134.213	1	0.598837	1
WT	71	2517	1	1	TSeries-08072019-1155-001	4p_500	4	500	35	0		113.435	0
WT	71	2517	1	1	TSeries-08072019-1155-001	4p_500	4	500	36	1	0.587096	85.5467	1	0.587096	1
WT	71	2517	1	1	TSeries-08072019-1155-001	4p_500	4	500	37	1	0.780764	108.481	1	0.780764	1
WT	71	2517	1	1	TSeries-08072019-1155-001	4p_500	4	500	38	0		128.734	0
WT	71	2517	1	1	TSeries-08072019-1155-001	4p_500	4	500	39	1	0.397108	156.265	1	0.397108	1
WT	71	2517	1	1	TSeries-08072019-1155-001	4p_500	4	500	40	0		69.3539	0
WT	71	2517	1	1	TSeries-08072019-1155-001	4p_500	4	500	41	0		11.9499	0
WT	71	2517	1	1	TSeries-08072019-1155-001	4p_500	4	500	42	0		37.3911	0
WT	71	2517	1	1	TSeries-08072019-1155-001	4p_500	4	500	43	0		57.3715	0
WT	71	2517	1	1	TSeries-08072019-1155-001	4p_500	4	500	44	0		73.3226	0
WT	71	2517	1	1	TSeries-08072019-1155-001	4p_500	4	500	45	0		97.1705	0
WT	71	2517	1	1	TSeries-08072019-1155-001	4p_500	4	500	46	0		87.613	0
WT	71	2517	1	1	TSeries-08072019-1155-001	4p_500	4	500	47	0		13.7163	0
WT	71	2517	1	1	TSeries-08072019-1155-001	4p_500	4	500	48	0		30.7122	0
WT	71	2517	1	1	TSeries-08072019-1155-001	4p_500	4	500	49	0		31.8265	0
WT	71	2517	1	1	TSeries-08072019-1155-001	4p_500	4	500	50	0		48.6388	0
WT	71	2517	1	1	TSeries-08072019-1155-001	4p_500	4	500	51	0		64.8284	0
WT	71	2517	1	1	TSeries-08072019-1155-001	4p_500	4	500	52	0		112.668	0
WT	71	2517	1	1	TSeries-08072019-1155-001	4p_500	4	500	53	1	0.169888	123.35	1	0.169888	1
WT	71	2517	1	1	TSeries-08072019-1155-001	4p_500	4	500	54	1	1.03581	98.4432	1	1.03581	2
WT	71	2517	1	1	TSeries-08072019-1155-001	4p_500	4	500	55	0		87.0118	0
WT	71	2517	1	1	TSeries-08072019-1155-001	4p_500	4	500	56	1	1.07168	64.506	1	1.07168	1
WT	71	2517	1	1	TSeries-08072019-1155-001	4p_500	4	500	57	0		138.765	0
WT	71	2517	1	1	TSeries-08072019-1155-001	4p_500	4	500	58	1	0.355439	146.971	1	0.355439	1
WT	71	2517	1	1	TSeries-08072019-1155-001	4p_500	4	500	59	0		169.574	0
WT	71	2517	1	1	TSeries-08072019-1155-001	4p_500	4	500	60	0		158.024	0
WT	71	2517	1	1	TSeries-08072019-1155-001	4p_500	4	500	61	0		201.995	0
WT	71	2517	1	1	TSeries-08072019-1155-001	4p_500	4	500	62	1	0.62715	150.433	1	0.62715	1
WT	71	2517	1	1	TSeries-08072019-1155-001	4p_500	4	500	63	1	0.285537	74.59	1	0.285537	1
WT	71	2517	1	1	TSeries-08072019-1155-001	4p_500	4	500	64	0		53.0186	0
WT	71	2517	1	1	TSeries-08072019-1155-001	4p_500	4	500	65	0		42.308	0
WT	71	2517	1	1	TSeries-08072019-1155-001	4p_500	4	500	66	1	0.106541	27.7772	1	0.106541	1
WT	71	2517	1	1	TSeries-08072019-1155-001	4p_500	4	500	67	0		10.0926	0
WT	71	2517	1	1	TSeries-08072019-1155-001	4p_500	4	500	68	0		31.7953	0
WT	71	2517	1	1	TSeries-08072019-1155-001	4p_500	4	500	69	0		36.7351	0
WT	71	2517	1	1	TSeries-08072019-1155-001	4p_500	4	500	70	0		54.2971	0
WT	71	2517	1	1	TSeries-08072019-1155-001	4p_500	4	500	71	0		81.3836	0
WT	71	2517	1	1	TSeries-08072019-1155-001	4p_500	4	500	72	0		92.8608	0
WT	71	2517	1	1	TSeries-08072019-1155-001	4p_500	4	500	73	0		107.359	0
WT	71	2517	1	1	TSeries-08072019-1155-001	4p_500	4	500	74	1	0.307419	143.404	1	0.307419	1
WT	71	2517	1	1	TSeries-08072019-1155-001	4p_500	4	500	75	0		201.328	0
WT	71	2517	1	1	TSeries-08072019-1155-001	4p_500	4	500	76	1	1.85303	229.309	1	1.85303	2
WT	71	2517	1	1	TSeries-08072019-1155-001	4p_500	4	500	77	1	0.918183	151.824	1	0.918183	1
WT	71	2517	1	1	TSeries-08072019-1155-001	4p_500	4	500	78	1	0.839441	85.0126	1	0.839441	3
WT	71	2517	1	1	TSeries-08072019-1155-001	4p_500	4	500	79	0		90.869	0
WT	71	2517	1	1	TSeries-08072019-1155-001	4p_500	4	500	80	0		66.6913	0
WT	71	2517	1	1	TSeries-08072019-1155-001	4p_500	4	500	81	0		42.3204	0
WT	71	2517	1	1	TSeries-08072019-1155-001	4p_500	4	500	82	0		22.3622	0
WT	71	2517	1	1	TSeries-08072019-1155-001	4p_500	4	500	83	0		52.3426	0
WT	71	2517	1	1	TSeries-08072019-1155-001	4p_500	4	500	84	1	0.311411	31.6441	1	0.311411	1
WT	71	2517	1	1	TSeries-08072019-1155-001	4p_500	4	500	85	0		78.5741	0
WT	71	2517	1	1	TSeries-08072019-1155-001	4p_500	4	500	86	1	0.0687488	101.398	1	0.0687488	1
WT	71	2517	1	1	TSeries-08072019-1155-001	4p_500	4	500	87	0		119.869	0
WT	71	2517	1	1	TSeries-08072019-1155-001	4p_500	4	500	88	0		156.988	0
WT	71	2517	1	1	TSeries-08072019-1155-001	4p_500	4	500	89	1	0.200101	184.723	1	0.200101	1
WT	71	2517	1	1	TSeries-08072019-1155-001	4p_500	4	500	90	1	0.259274	201.215	1	0.259274	1
WT	71	2517	1	1	TSeries-08072019-1155-001	4p_500	4	500	91	1	0.322188	232.81	1	0.322188	1
WT	71	2517	1	1	TSeries-08072019-1155-001	4p_500	4	500	92	0		151.897	0
WT	71	2517	1	1	TSeries-08072019-1155-001	4p_500	4	500	93	0		170.505	0
WT	71	2517	1	1	TSeries-08072019-1155-001	4p_500	4	500	94	0		190.012	0
WT	71	2517	1	1	TSeries-08072019-1155-001	4p_500	4	500	95	1	0.906037	214.802	1	0.906037	1
WT	71	2517	1	1	TSeries-08072019-1155-001	4p_500	4	500	96	1	0.842084	83.7468	1	0.842084	2
WT	71	2517	1	1	TSeries-08072019-1155-001	4p_500	4	500	97	0		70.7	0
WT	71	2517	1	1	TSeries-08072019-1155-001	4p_500	4	500	98	0		65.2621	0
WT	71	2517	1	1	TSeries-08072019-1155-001	4p_500	4	500	99	0		52.0685	0
WT	71	2517	1	1	TSeries-08072019-1155-001	4p_500	4	500	100	0		146.676	0
WT	71	2517	1	1	TSeries-08072019-1155-001	4p_500	4	500	101	0		130.37	0
WT	71	2517	1	1	TSeries-08072019-1155-001	4p_500	4	500	102	0		46.1946	0
WT	71	2517	1	1	TSeries-08072019-1155-001	4p_500	4	500	103	0		244.516	0
WT	71	2517	1	1	TSeries-08072019-1155-002	4p_400	4	400	0	1	0.369119		1	0.369119	1
WT	71	2517	1	1	TSeries-08072019-1155-002	4p_400	4	400	1	0			0
WT	71	2517	1	1	TSeries-08072019-1155-002	4p_400	4	400	2	0			0
WT	71	2517	1	1	TSeries-08072019-1155-002	4p_400	4	400	3	0			0
WT	71	2517	1	1	TSeries-08072019-1155-002	4p_400	4	400	4	0			0
WT	71	2517	1	1	TSeries-08072019-1155-002	4p_400	4	400	5	0			0
WT	71	2517	1	1	TSeries-08072019-1155-002	4p_400	4	400	6	0			0
WT	71	2517	1	1	TSeries-08072019-1155-002	4p_400	4	400	7	0			0
WT	71	2517	1	1	TSeries-08072019-1155-002	4p_400	4	400	8	0			0
WT	71	2517	1	1	TSeries-08072019-1155-002	4p_400	4	400	9	0			0
WT	71	2517	1	1	TSeries-08072019-1155-002	4p_400	4	400	10	0			0
WT	71	2517	1	1	TSeries-08072019-1155-002	4p_400	4	400	11	0			0
WT	71	2517	1	1	TSeries-08072019-1155-002	4p_400	4	400	12	0			0
WT	71	2517	1	1	TSeries-08072019-1155-002	4p_400	4	400	13	0			0
WT	71	2517	1	1	TSeries-08072019-1155-002	4p_400	4	400	14	0			0
WT	71	2517	1	1	TSeries-08072019-1155-002	4p_400	4	400	15	0			0
WT	71	2517	1	1	TSeries-08072019-1155-002	4p_400	4	400	16	0			0
WT	71	2517	1	1	TSeries-08072019-1155-002	4p_400	4	400	17	1	0.482685		1	0.482685	1
WT	71	2517	1	1	TSeries-08072019-1155-002	4p_400	4	400	18	0			0
WT	71	2517	1	1	TSeries-08072019-1155-002	4p_400	4	400	19	1	0.788534		1	0.788534	2
WT	71	2517	1	1	TSeries-08072019-1155-002	4p_400	4	400	20	0			0
WT	71	2517	1	1	TSeries-08072019-1155-002	4p_400	4	400	21	0			0
WT	71	2517	1	1	TSeries-08072019-1155-002	4p_400	4	400	22	0			0
WT	71	2517	1	1	TSeries-08072019-1155-002	4p_400	4	400	23	1	0.180649		1	0.180649	1
WT	71	2517	1	1	TSeries-08072019-1155-002	4p_400	4	400	24	0			0
WT	71	2517	1	1	TSeries-08072019-1155-002	4p_400	4	400	25	0			0
WT	71	2517	1	1	TSeries-08072019-1155-002	4p_400	4	400	26	0			0
WT	71	2517	1	1	TSeries-08072019-1155-002	4p_400	4	400	27	0			0
WT	71	2517	1	1	TSeries-08072019-1155-002	4p_400	4	400	28	0			0
WT	71	2517	1	1	TSeries-08072019-1155-002	4p_400	4	400	29	0			0
WT	71	2517	1	1	TSeries-08072019-1155-002	4p_400	4	400	30	0			0
WT	71	2517	1	1	TSeries-08072019-1155-002	4p_400	4	400	31	0			0
WT	71	2517	1	1	TSeries-08072019-1155-002	4p_400	4	400	32	0			0
WT	71	2517	1	1	TSeries-08072019-1155-002	4p_400	4	400	33	1	0.672685		1	0.672685	1
WT	71	2517	1	1	TSeries-08072019-1155-002	4p_400	4	400	34	1	0.393315		1	0.393315	1
WT	71	2517	1	1	TSeries-08072019-1155-002	4p_400	4	400	35	0			0
WT	71	2517	1	1	TSeries-08072019-1155-002	4p_400	4	400	36	1	0.512209		1	0.512209	1
WT	71	2517	1	1	TSeries-08072019-1155-002	4p_400	4	400	37	1	0.538509		1	0.538509	2
WT	71	2517	1	1	TSeries-08072019-1155-002	4p_400	4	400	38	0			0
WT	71	2517	1	1	TSeries-08072019-1155-002	4p_400	4	400	39	0			0
WT	71	2517	1	1	TSeries-08072019-1155-002	4p_400	4	400	40	0			0
WT	71	2517	1	1	TSeries-08072019-1155-002	4p_400	4	400	41	0			0
WT	71	2517	1	1	TSeries-08072019-1155-002	4p_400	4	400	42	0			0
WT	71	2517	1	1	TSeries-08072019-1155-002	4p_400	4	400	43	0			0
WT	71	2517	1	1	TSeries-08072019-1155-002	4p_400	4	400	44	0			0
WT	71	2517	1	1	TSeries-08072019-1155-002	4p_400	4	400	45	0			0
WT	71	2517	1	1	TSeries-08072019-1155-002	4p_400	4	400	46	0			0
WT	71	2517	1	1	TSeries-08072019-1155-002	4p_400	4	400	47	0			0
WT	71	2517	1	1	TSeries-08072019-1155-002	4p_400	4	400	48	0			0
WT	71	2517	1	1	TSeries-08072019-1155-002	4p_400	4	400	49	0			0
WT	71	2517	1	1	TSeries-08072019-1155-002	4p_400	4	400	50	0			0
WT	71	2517	1	1	TSeries-08072019-1155-002	4p_400	4	400	51	0			0
WT	71	2517	1	1	TSeries-08072019-1155-002	4p_400	4	400	52	0			0
WT	71	2517	1	1	TSeries-08072019-1155-002	4p_400	4	400	53	0			0
WT	71	2517	1	1	TSeries-08072019-1155-002	4p_400	4	400	54	1	0.737133		1	0.737133	1
WT	71	2517	1	1	TSeries-08072019-1155-002	4p_400	4	400	55	0			0
WT	71	2517	1	1	TSeries-08072019-1155-002	4p_400	4	400	56	1	0.633487		1	0.633487	1
WT	71	2517	1	1	TSeries-08072019-1155-002	4p_400	4	400	57	0			0
WT	71	2517	1	1	TSeries-08072019-1155-002	4p_400	4	400	58	0			0
WT	71	2517	1	1	TSeries-08072019-1155-002	4p_400	4	400	59	0			0
WT	71	2517	1	1	TSeries-08072019-1155-002	4p_400	4	400	60	0			0
WT	71	2517	1	1	TSeries-08072019-1155-002	4p_400	4	400	61	1	0.373508		0
WT	71	2517	1	1	TSeries-08072019-1155-002	4p_400	4	400	62	0			0
WT	71	2517	1	1	TSeries-08072019-1155-002	4p_400	4	400	63	1	0.231354		1	0.231354	1
WT	71	2517	1	1	TSeries-08072019-1155-002	4p_400	4	400	64	0			0
WT	71	2517	1	1	TSeries-08072019-1155-002	4p_400	4	400	65	0			0
WT	71	2517	1	1	TSeries-08072019-1155-002	4p_400	4	400	66	0			0
WT	71	2517	1	1	TSeries-08072019-1155-002	4p_400	4	400	67	0			0
WT	71	2517	1	1	TSeries-08072019-1155-002	4p_400	4	400	68	0			0
WT	71	2517	1	1	TSeries-08072019-1155-002	4p_400	4	400	69	0			0
WT	71	2517	1	1	TSeries-08072019-1155-002	4p_400	4	400	70	0			0
WT	71	2517	1	1	TSeries-08072019-1155-002	4p_400	4	400	71	0			0
WT	71	2517	1	1	TSeries-08072019-1155-002	4p_400	4	400	72	1	0.183181		0
WT	71	2517	1	1	TSeries-08072019-1155-002	4p_400	4	400	73	0			0
WT	71	2517	1	1	TSeries-08072019-1155-002	4p_400	4	400	74	0			0
WT	71	2517	1	1	TSeries-08072019-1155-002	4p_400	4	400	75	0			0
WT	71	2517	1	1	TSeries-08072019-1155-002	4p_400	4	400	76	1	1.17153		1	1.17153	1
WT	71	2517	1	1	TSeries-08072019-1155-002	4p_400	4	400	77	1	0.283327		1	0.283327	1
WT	71	2517	1	1	TSeries-08072019-1155-002	4p_400	4	400	78	1	1.1689		1	1.1689	1
WT	71	2517	1	1	TSeries-08072019-1155-002	4p_400	4	400	79	0			0
WT	71	2517	1	1	TSeries-08072019-1155-002	4p_400	4	400	80	0			0
WT	71	2517	1	1	TSeries-08072019-1155-002	4p_400	4	400	81	0			0
WT	71	2517	1	1	TSeries-08072019-1155-002	4p_400	4	400	82	0			0
WT	71	2517	1	1	TSeries-08072019-1155-002	4p_400	4	400	83	0			0
WT	71	2517	1	1	TSeries-08072019-1155-002	4p_400	4	400	84	0			0
WT	71	2517	1	1	TSeries-08072019-1155-002	4p_400	4	400	85	0			0
WT	71	2517	1	1	TSeries-08072019-1155-002	4p_400	4	400	86	0			0
WT	71	2517	1	1	TSeries-08072019-1155-002	4p_400	4	400	87	0			0
WT	71	2517	1	1	TSeries-08072019-1155-002	4p_400	4	400	88	0			0
WT	71	2517	1	1	TSeries-08072019-1155-002	4p_400	4	400	89	0			0
WT	71	2517	1	1	TSeries-08072019-1155-002	4p_400	4	400	90	0			0
WT	71	2517	1	1	TSeries-08072019-1155-002	4p_400	4	400	91	0			0
WT	71	2517	1	1	TSeries-08072019-1155-002	4p_400	4	400	92	0			0
WT	71	2517	1	1	TSeries-08072019-1155-002	4p_400	4	400	93	0			0
WT	71	2517	1	1	TSeries-08072019-1155-002	4p_400	4	400	94	0			0
WT	71	2517	1	1	TSeries-08072019-1155-002	4p_400	4	400	95	0			0
WT	71	2517	1	1	TSeries-08072019-1155-002	4p_400	4	400	96	1	0.505403		1	0.505403	2
WT	71	2517	1	1	TSeries-08072019-1155-002	4p_400	4	400	97	0			0
WT	71	2517	1	1	TSeries-08072019-1155-002	4p_400	4	400	98	0			0
WT	71	2517	1	1	TSeries-08072019-1155-002	4p_400	4	400	99	0			0
WT	71	2517	1	1	TSeries-08072019-1155-002	4p_400	4	400	100	1	0.409428		0
WT	71	2517	1	1	TSeries-08072019-1155-002	4p_400	4	400	101	0			0
WT	71	2517	1	1	TSeries-08072019-1155-002	4p_400	4	400	102	0			0
WT	71	2517	1	1	TSeries-08072019-1155-002	4p_400	4	400	103	0			0
WT	71	2517	1	1	TSeries-08072019-1155-003	4p_300	4	300	0	0			0
WT	71	2517	1	1	TSeries-08072019-1155-003	4p_300	4	300	1	0			0
WT	71	2517	1	1	TSeries-08072019-1155-003	4p_300	4	300	2	0			0
WT	71	2517	1	1	TSeries-08072019-1155-003	4p_300	4	300	3	0			0
WT	71	2517	1	1	TSeries-08072019-1155-003	4p_300	4	300	4	0			0
WT	71	2517	1	1	TSeries-08072019-1155-003	4p_300	4	300	5	0			0
WT	71	2517	1	1	TSeries-08072019-1155-003	4p_300	4	300	6	0			0
WT	71	2517	1	1	TSeries-08072019-1155-003	4p_300	4	300	7	0			0
WT	71	2517	1	1	TSeries-08072019-1155-003	4p_300	4	300	8	0			0
WT	71	2517	1	1	TSeries-08072019-1155-003	4p_300	4	300	9	0			0
WT	71	2517	1	1	TSeries-08072019-1155-003	4p_300	4	300	10	0			0
WT	71	2517	1	1	TSeries-08072019-1155-003	4p_300	4	300	11	0			0
WT	71	2517	1	1	TSeries-08072019-1155-003	4p_300	4	300	12	0			0
WT	71	2517	1	1	TSeries-08072019-1155-003	4p_300	4	300	13	0			0
WT	71	2517	1	1	TSeries-08072019-1155-003	4p_300	4	300	14	0			0
WT	71	2517	1	1	TSeries-08072019-1155-003	4p_300	4	300	15	0			0
WT	71	2517	1	1	TSeries-08072019-1155-003	4p_300	4	300	16	0			0
WT	71	2517	1	1	TSeries-08072019-1155-003	4p_300	4	300	17	0			0
WT	71	2517	1	1	TSeries-08072019-1155-003	4p_300	4	300	18	0			0
WT	71	2517	1	1	TSeries-08072019-1155-003	4p_300	4	300	19	0			0
WT	71	2517	1	1	TSeries-08072019-1155-003	4p_300	4	300	20	0			0
WT	71	2517	1	1	TSeries-08072019-1155-003	4p_300	4	300	21	0			0
WT	71	2517	1	1	TSeries-08072019-1155-003	4p_300	4	300	22	0			0
WT	71	2517	1	1	TSeries-08072019-1155-003	4p_300	4	300	23	0			0
WT	71	2517	1	1	TSeries-08072019-1155-003	4p_300	4	300	24	0			0
WT	71	2517	1	1	TSeries-08072019-1155-003	4p_300	4	300	25	0			0
WT	71	2517	1	1	TSeries-08072019-1155-003	4p_300	4	300	26	0			0
WT	71	2517	1	1	TSeries-08072019-1155-003	4p_300	4	300	27	0			0
WT	71	2517	1	1	TSeries-08072019-1155-003	4p_300	4	300	28	1	0.270268		0
WT	71	2517	1	1	TSeries-08072019-1155-003	4p_300	4	300	29	0			0
WT	71	2517	1	1	TSeries-08072019-1155-003	4p_300	4	300	30	0			0
WT	71	2517	1	1	TSeries-08072019-1155-003	4p_300	4	300	31	0			0
WT	71	2517	1	1	TSeries-08072019-1155-003	4p_300	4	300	32	0			0
WT	71	2517	1	1	TSeries-08072019-1155-003	4p_300	4	300	33	0			0
WT	71	2517	1	1	TSeries-08072019-1155-003	4p_300	4	300	34	0			0
WT	71	2517	1	1	TSeries-08072019-1155-003	4p_300	4	300	35	0			0
WT	71	2517	1	1	TSeries-08072019-1155-003	4p_300	4	300	36	0			0
WT	71	2517	1	1	TSeries-08072019-1155-003	4p_300	4	300	37	0			0
WT	71	2517	1	1	TSeries-08072019-1155-003	4p_300	4	300	38	0			0
WT	71	2517	1	1	TSeries-08072019-1155-003	4p_300	4	300	39	0			0
WT	71	2517	1	1	TSeries-08072019-1155-003	4p_300	4	300	40	0			0
WT	71	2517	1	1	TSeries-08072019-1155-003	4p_300	4	300	41	0			0
WT	71	2517	1	1	TSeries-08072019-1155-003	4p_300	4	300	42	0			0
WT	71	2517	1	1	TSeries-08072019-1155-003	4p_300	4	300	43	0			0
WT	71	2517	1	1	TSeries-08072019-1155-003	4p_300	4	300	44	0			0
WT	71	2517	1	1	TSeries-08072019-1155-003	4p_300	4	300	45	0			0
WT	71	2517	1	1	TSeries-08072019-1155-003	4p_300	4	300	46	0			0
WT	71	2517	1	1	TSeries-08072019-1155-003	4p_300	4	300	47	0			0
WT	71	2517	1	1	TSeries-08072019-1155-003	4p_300	4	300	48	0			0
WT	71	2517	1	1	TSeries-08072019-1155-003	4p_300	4	300	49	0			0
WT	71	2517	1	1	TSeries-08072019-1155-003	4p_300	4	300	50	0			0
WT	71	2517	1	1	TSeries-08072019-1155-003	4p_300	4	300	51	0			0
WT	71	2517	1	1	TSeries-08072019-1155-003	4p_300	4	300	52	0			0
WT	71	2517	1	1	TSeries-08072019-1155-003	4p_300	4	300	53	0			0
WT	71	2517	1	1	TSeries-08072019-1155-003	4p_300	4	300	54	0			0
WT	71	2517	1	1	TSeries-08072019-1155-003	4p_300	4	300	55	0			0
WT	71	2517	1	1	TSeries-08072019-1155-003	4p_300	4	300	56	0			0
WT	71	2517	1	1	TSeries-08072019-1155-003	4p_300	4	300	57	0			0
WT	71	2517	1	1	TSeries-08072019-1155-003	4p_300	4	300	58	0			0
WT	71	2517	1	1	TSeries-08072019-1155-003	4p_300	4	300	59	0			0
WT	71	2517	1	1	TSeries-08072019-1155-003	4p_300	4	300	60	0			0
WT	71	2517	1	1	TSeries-08072019-1155-003	4p_300	4	300	61	0			0
WT	71	2517	1	1	TSeries-08072019-1155-003	4p_300	4	300	62	0			0
WT	71	2517	1	1	TSeries-08072019-1155-003	4p_300	4	300	63	1	0.0993972		1	0.0993972	1
WT	71	2517	1	1	TSeries-08072019-1155-003	4p_300	4	300	64	0			0
WT	71	2517	1	1	TSeries-08072019-1155-003	4p_300	4	300	65	0			0
WT	71	2517	1	1	TSeries-08072019-1155-003	4p_300	4	300	66	0			0
WT	71	2517	1	1	TSeries-08072019-1155-003	4p_300	4	300	67	0			0
WT	71	2517	1	1	TSeries-08072019-1155-003	4p_300	4	300	68	0			0
WT	71	2517	1	1	TSeries-08072019-1155-003	4p_300	4	300	69	0			0
WT	71	2517	1	1	TSeries-08072019-1155-003	4p_300	4	300	70	0			0
WT	71	2517	1	1	TSeries-08072019-1155-003	4p_300	4	300	71	0			0
WT	71	2517	1	1	TSeries-08072019-1155-003	4p_300	4	300	72	0			0
WT	71	2517	1	1	TSeries-08072019-1155-003	4p_300	4	300	73	0			0
WT	71	2517	1	1	TSeries-08072019-1155-003	4p_300	4	300	74	0			0
WT	71	2517	1	1	TSeries-08072019-1155-003	4p_300	4	300	75	0			0
WT	71	2517	1	1	TSeries-08072019-1155-003	4p_300	4	300	76	1	0.839944		1	0.839944	1
WT	71	2517	1	1	TSeries-08072019-1155-003	4p_300	4	300	77	1	0.382529		1	0.382529	1
WT	71	2517	1	1	TSeries-08072019-1155-003	4p_300	4	300	78	0			0
WT	71	2517	1	1	TSeries-08072019-1155-003	4p_300	4	300	79	0			0
WT	71	2517	1	1	TSeries-08072019-1155-003	4p_300	4	300	80	0			0
WT	71	2517	1	1	TSeries-08072019-1155-003	4p_300	4	300	81	0			0
WT	71	2517	1	1	TSeries-08072019-1155-003	4p_300	4	300	82	0			0
WT	71	2517	1	1	TSeries-08072019-1155-003	4p_300	4	300	83	0			0
WT	71	2517	1	1	TSeries-08072019-1155-003	4p_300	4	300	84	0			0
WT	71	2517	1	1	TSeries-08072019-1155-003	4p_300	4	300	85	0			0
WT	71	2517	1	1	TSeries-08072019-1155-003	4p_300	4	300	86	0			0
WT	71	2517	1	1	TSeries-08072019-1155-003	4p_300	4	300	87	0			0
WT	71	2517	1	1	TSeries-08072019-1155-003	4p_300	4	300	88	0			0
WT	71	2517	1	1	TSeries-08072019-1155-003	4p_300	4	300	89	0			0
WT	71	2517	1	1	TSeries-08072019-1155-003	4p_300	4	300	90	0			0
WT	71	2517	1	1	TSeries-08072019-1155-003	4p_300	4	300	91	0			0
WT	71	2517	1	1	TSeries-08072019-1155-003	4p_300	4	300	92	0			0
WT	71	2517	1	1	TSeries-08072019-1155-003	4p_300	4	300	93	0			0
WT	71	2517	1	1	TSeries-08072019-1155-003	4p_300	4	300	94	0			0
WT	71	2517	1	1	TSeries-08072019-1155-003	4p_300	4	300	95	0			0
WT	71	2517	1	1	TSeries-08072019-1155-003	4p_300	4	300	96	0			0
WT	71	2517	1	1	TSeries-08072019-1155-003	4p_300	4	300	97	0			0
WT	71	2517	1	1	TSeries-08072019-1155-003	4p_300	4	300	98	0			0
WT	71	2517	1	1	TSeries-08072019-1155-003	4p_300	4	300	99	0			0
WT	71	2517	1	1	TSeries-08072019-1155-003	4p_300	4	300	100	0			0
WT	71	2517	1	1	TSeries-08072019-1155-003	4p_300	4	300	101	0			0
WT	71	2517	1	1	TSeries-08072019-1155-003	4p_300	4	300	102	0			0
WT	71	2517	1	1	TSeries-08072019-1155-003	4p_300	4	300	103	0			0
WT	71	2517	1	1	TSeries-08072019-1155-004	4p_200	4	200	0	0			0
WT	71	2517	1	1	TSeries-08072019-1155-004	4p_200	4	200	1	0			0
WT	71	2517	1	1	TSeries-08072019-1155-004	4p_200	4	200	2	0			0
WT	71	2517	1	1	TSeries-08072019-1155-004	4p_200	4	200	3	0			0
WT	71	2517	1	1	TSeries-08072019-1155-004	4p_200	4	200	4	0			0
WT	71	2517	1	1	TSeries-08072019-1155-004	4p_200	4	200	5	0			0
WT	71	2517	1	1	TSeries-08072019-1155-004	4p_200	4	200	6	0			0
WT	71	2517	1	1	TSeries-08072019-1155-004	4p_200	4	200	7	0			0
WT	71	2517	1	1	TSeries-08072019-1155-004	4p_200	4	200	8	0			0
WT	71	2517	1	1	TSeries-08072019-1155-004	4p_200	4	200	9	0			0
WT	71	2517	1	1	TSeries-08072019-1155-004	4p_200	4	200	10	0			0
WT	71	2517	1	1	TSeries-08072019-1155-004	4p_200	4	200	11	0			0
WT	71	2517	1	1	TSeries-08072019-1155-004	4p_200	4	200	12	0			0
WT	71	2517	1	1	TSeries-08072019-1155-004	4p_200	4	200	13	0			0
WT	71	2517	1	1	TSeries-08072019-1155-004	4p_200	4	200	14	0			0
WT	71	2517	1	1	TSeries-08072019-1155-004	4p_200	4	200	15	0			0
WT	71	2517	1	1	TSeries-08072019-1155-004	4p_200	4	200	16	0			0
WT	71	2517	1	1	TSeries-08072019-1155-004	4p_200	4	200	17	0			0
WT	71	2517	1	1	TSeries-08072019-1155-004	4p_200	4	200	18	0			0
WT	71	2517	1	1	TSeries-08072019-1155-004	4p_200	4	200	19	0			0
WT	71	2517	1	1	TSeries-08072019-1155-004	4p_200	4	200	20	0			0
WT	71	2517	1	1	TSeries-08072019-1155-004	4p_200	4	200	21	0			0
WT	71	2517	1	1	TSeries-08072019-1155-004	4p_200	4	200	22	0			0
WT	71	2517	1	1	TSeries-08072019-1155-004	4p_200	4	200	23	0			0
WT	71	2517	1	1	TSeries-08072019-1155-004	4p_200	4	200	24	0			0
WT	71	2517	1	1	TSeries-08072019-1155-004	4p_200	4	200	25	0			0
WT	71	2517	1	1	TSeries-08072019-1155-004	4p_200	4	200	26	0			0
WT	71	2517	1	1	TSeries-08072019-1155-004	4p_200	4	200	27	0			0
WT	71	2517	1	1	TSeries-08072019-1155-004	4p_200	4	200	28	0			0
WT	71	2517	1	1	TSeries-08072019-1155-004	4p_200	4	200	29	0			0
WT	71	2517	1	1	TSeries-08072019-1155-004	4p_200	4	200	30	0			0
WT	71	2517	1	1	TSeries-08072019-1155-004	4p_200	4	200	31	0			0
WT	71	2517	1	1	TSeries-08072019-1155-004	4p_200	4	200	32	0			0
WT	71	2517	1	1	TSeries-08072019-1155-004	4p_200	4	200	33	0			0
WT	71	2517	1	1	TSeries-08072019-1155-004	4p_200	4	200	34	0			0
WT	71	2517	1	1	TSeries-08072019-1155-004	4p_200	4	200	35	0			0
WT	71	2517	1	1	TSeries-08072019-1155-004	4p_200	4	200	36	0			0
WT	71	2517	1	1	TSeries-08072019-1155-004	4p_200	4	200	37	0			0
WT	71	2517	1	1	TSeries-08072019-1155-004	4p_200	4	200	38	0			0
WT	71	2517	1	1	TSeries-08072019-1155-004	4p_200	4	200	39	0			0
WT	71	2517	1	1	TSeries-08072019-1155-004	4p_200	4	200	40	0			0
WT	71	2517	1	1	TSeries-08072019-1155-004	4p_200	4	200	41	0			0
WT	71	2517	1	1	TSeries-08072019-1155-004	4p_200	4	200	42	0			0
WT	71	2517	1	1	TSeries-08072019-1155-004	4p_200	4	200	43	0			0
WT	71	2517	1	1	TSeries-08072019-1155-004	4p_200	4	200	44	0			0
WT	71	2517	1	1	TSeries-08072019-1155-004	4p_200	4	200	45	0			0
WT	71	2517	1	1	TSeries-08072019-1155-004	4p_200	4	200	46	0			0
WT	71	2517	1	1	TSeries-08072019-1155-004	4p_200	4	200	47	0			0
WT	71	2517	1	1	TSeries-08072019-1155-004	4p_200	4	200	48	0			0
WT	71	2517	1	1	TSeries-08072019-1155-004	4p_200	4	200	49	0			0
WT	71	2517	1	1	TSeries-08072019-1155-004	4p_200	4	200	50	0			0
WT	71	2517	1	1	TSeries-08072019-1155-004	4p_200	4	200	51	0			0
WT	71	2517	1	1	TSeries-08072019-1155-004	4p_200	4	200	52	0			0
WT	71	2517	1	1	TSeries-08072019-1155-004	4p_200	4	200	53	0			0
WT	71	2517	1	1	TSeries-08072019-1155-004	4p_200	4	200	54	0			0
WT	71	2517	1	1	TSeries-08072019-1155-004	4p_200	4	200	55	0			0
WT	71	2517	1	1	TSeries-08072019-1155-004	4p_200	4	200	56	0			0
[truncated: 29,127 more rows]
