# Supplementary material for: Corticohippocampal circuit dysfunction in a mouse model of Dravet syndrome
Source: eLife. 2022 Feb 25;11:e69293. doi: 10.7554/eLife.69293 (PMC8920506; doi:10.7554/eLife.69293)
Supplement: Figure 2—source data 2. [file elife-69293-fig2-data2.xlsx]

## Sheet: early postnatal - by field
Genotype	age	mouse	slice	field	File name	condition	pulses	power	PTX	Total Cells	Activated Cells
Scn1a	14	2136	1	1	TSeries-03082019-1159-022	4p_400	4	400	0	17	9
Scn1a	14	2136	1	1	TSeries-03082019-1159-023	1p_400	1	400	0	17	5
Scn1a	14	2136	1	1	TSeries-03082019-1159-027	4p_200	4	200	0	17	0
Scn1a	14	2136	1	1	TSeries-03082019-1159-028	4p_100	4	100	0	17	0
Scn1a	14	2136	1	1	TSeries-03082019-1159-029	4p_50	4	50	0	17	0
Scn1a	14	2136	1	1	TSeries-03082019-1159-030	4p_25	4	25	0	17	0
Scn1a	14	2136	1	1	TSeries-03082019-1159-031	1p_200	1	200	0	17	0
Scn1a	14	2136	1	1	TSeries-03082019-1159-032	1p_100	1	100	0	17	1
Scn1a	14	2136	1	1	TSeries-03082019-1159-033	1p_50	1	50	0	17	0
Scn1a	14	2136	1	1	TSeries-03082019-1159-034	1p_25	1	25	0	17	1
Scn1a	14	2136	1	2	TSeries-03082019-1159-035	4p_400	4	400	0	21	17
Scn1a	14	2136	1	2	TSeries-03082019-1159-036	4p_200	4	200	0	21	17
Scn1a	14	2136	1	2	TSeries-03082019-1159-037	4p_100	4	100	0	21	8
Scn1a	14	2136	1	2	TSeries-03082019-1159-038	4p_50	4	50	0	21	0
Scn1a	14	2136	1	2	TSeries-03082019-1159-039	4p_25	4	25	0	21	0
Scn1a	14	2136	1	2	TSeries-03082019-1159-040	1p_400	1	400	0	21	15
Scn1a	14	2136	1	2	TSeries-03082019-1159-041	1p_200	1	200	0	21	6
Scn1a	14	2136	1	2	TSeries-03082019-1159-042	1p_100	1	100	0	21	3
Scn1a	14	2136	1	2	TSeries-03082019-1159-043	1p_50	1	50	0	21	0
Scn1a	14	2136	1	2	TSeries-03082019-1159-044	1p_25	1	25	0	21	0
Scn1a	14	2136	1	3	TSeries-03082019-1159-046	4p_400	4	400	0	16	16
Scn1a	14	2136	1	3	TSeries-03082019-1159-047	4p_200	4	200	0	16	14
Scn1a	14	2136	1	3	TSeries-03082019-1159-048	4p_100	4	100	0	16	5
Scn1a	14	2136	1	3	TSeries-03082019-1159-049	4p_50	4	50	0	16	0
Scn1a	14	2136	1	3	TSeries-03082019-1159-050	4p_25	4	25	0	16	0
Scn1a	14	2136	1	3	TSeries-03082019-1159-051	1p_400	1	400	0	16	16
Scn1a	14	2136	1	3	TSeries-03082019-1159-052	1p_200	1	200	0	16	7
Scn1a	14	2136	1	3	TSeries-03082019-1159-053	1p_100	1	100	0	16	5
Scn1a	14	2136	1	3	TSeries-03082019-1159-054	1p_50	1	50	0	16	0
Scn1a	14	2136	1	3	TSeries-03082019-1159-055	1p_25	1	25	0	16	0
Scn1a	14	2136	2	4	TSeries-03082019-1159-056	4p_400	4	400	0	21	21
Scn1a	14	2136	2	4	TSeries-03082019-1159-057	4p_200	4	200	0	21	18
Scn1a	14	2136	2	4	TSeries-03082019-1159-058	4p_100	4	100	0	21	9
Scn1a	14	2136	2	4	TSeries-03082019-1159-059	4p_50	4	50	0	21	0
Scn1a	14	2136	2	4	TSeries-03082019-1159-060	4p_25	4	25	0	21	0
Scn1a	14	2136	2	4	TSeries-03082019-1159-061	1p_400	1	400	0	21	18
Scn1a	14	2136	2	4	TSeries-03082019-1159-062	1p_200	1	200	0	21	7
Scn1a	14	2136	2	4	TSeries-03082019-1159-063	1p_100	1	100	0	21	2
Scn1a	14	2136	2	4	TSeries-03082019-1159-064	1p_50	1	50	0	21	0
Scn1a	14	2136	2	4	TSeries-03082019-1159-065	1p_25	1	25	0	21	0
Scn1a	14	2136	2	6	TSeries-03082019-1159-076	4p_400	4	400	0	9	5
Scn1a	14	2136	2	6	TSeries-03082019-1159-077	4p_200	4	200	0	9	3
Scn1a	14	2136	2	6	TSeries-03082019-1159-078	4p_100	4	100	0	9	5
Scn1a	14	2136	2	6	TSeries-03082019-1159-079	4p_50	4	50	0	9	1
Scn1a	14	2136	2	6	TSeries-03082019-1159-080	4p_25	4	25	0	9	1
Scn1a	14	2136	2	6	TSeries-03082019-1159-081	1p_400	1	400	0	9	3
Scn1a	14	2136	2	6	TSeries-03082019-1159-082	1p_200	1	200	0	9	1
Scn1a	14	2136	2	6	TSeries-03082019-1159-083	1p_100	1	100	0	9	1
Scn1a	14	2136	2	6	TSeries-03082019-1159-084	1p_50	1	50	0	9	0
Scn1a	14	2136	2	6	TSeries-03082019-1159-085	1p_25	1	25	0	9	5
Scn1a	19	2303	1	1	TSeries-05062019-1113-001	4p_400	4	400	0	16	5
Scn1a	19	2303	1	1	TSeries-05062019-1113-002	4p_200	4	200	0	16	0
Scn1a	19	2303	1	1	TSeries-05062019-1113-003	4p_100	4	100	0	16	0
Scn1a	19	2303	1	1	TSeries-05062019-1113-004	4p_50	4	50	0	16	0
Scn1a	19	2303	1	1	TSeries-05062019-1113-005	4p_25	4	25	0	16	0
Scn1a	19	2303	1	1	TSeries-05062019-1113-006	1p_400	1	400	0	16	1
Scn1a	19	2303	1	1	TSeries-05062019-1113-007	1p_200	1	200	0	16	0
Scn1a	19	2303	1	1	TSeries-05062019-1113-008	1p_100	1	100	0	16	0
Scn1a	19	2303	1	1	TSeries-05062019-1113-009	1p_50	1	50	0	16	0
Scn1a	19	2303	1	1	TSeries-05062019-1113-010	1p_25	1	25	0	16	0
Scn1a	19	2303	1	2	TSeries-05062019-1113-011	4p_400	4	400	0	44	3
Scn1a	19	2303	1	2	TSeries-05062019-1113-012	4p_200	4	200	0	44	4
Scn1a	19	2303	1	2	TSeries-05062019-1113-013	4p_100	4	100	0	44	0
Scn1a	19	2303	1	2	TSeries-05062019-1113-014	4p_50	4	50	0	44	0
Scn1a	19	2303	1	2	TSeries-05062019-1113-015	4p_25	4	25	0	44	0
Scn1a	19	2303	1	2	TSeries-05062019-1113-016	1p_400	1	400	0	44	3
Scn1a	19	2303	1	2	TSeries-05062019-1113-017	1p_200	1	200	0	44	0
Scn1a	19	2303	1	2	TSeries-05062019-1113-018	1p_100	1	100	0	44	0
Scn1a	19	2303	1	2	TSeries-05062019-1113-019	1p_50	1	50	0	44	0
Scn1a	19	2303	1	2	TSeries-05062019-1113-020	1p_25	1	25	0	44	0
Scn1a	19	2303	1	3	TSeries-05062019-1113-021	4p_400	4	400	0	23	10
Scn1a	19	2303	1	3	TSeries-05062019-1113-022	4p_200	4	200	0	23	1
Scn1a	19	2303	1	3	TSeries-05062019-1113-023	4p_100	4	100	0	23	0
Scn1a	19	2303	1	3	TSeries-05062019-1113-024	4p_50	4	50	0	23	0
Scn1a	19	2303	1	3	TSeries-05062019-1113-025	4p_25	4	25	0	23	0
Scn1a	19	2303	1	3	TSeries-05062019-1113-026	1p_400	1	400	0	23	1
Scn1a	19	2303	1	3	TSeries-05062019-1113-027	1p_200	1	200	0	23	0
Scn1a	19	2303	1	3	TSeries-05062019-1113-028	1p_100	1	100	0	23	0
Scn1a	19	2303	1	3	TSeries-05062019-1113-029	1p_50	1	50	0	23	0
Scn1a	19	2303	1	3	TSeries-05062019-1113-030	1p_25	1	25	0	23	2
Scn1a	19	2303	1	5	TSeries-05062019-1113-041	4p_400	4	400	0	32	4
Scn1a	19	2303	1	5	TSeries-05062019-1113-042	4p_200	4	200	0	32	5
Scn1a	19	2303	1	5	TSeries-05062019-1113-043	4p_100	4	100	0	32	1
Scn1a	19	2303	1	5	TSeries-05062019-1113-044	4p_50	4	50	0	32	1
Scn1a	19	2303	1	5	TSeries-05062019-1113-045	4p_25	4	25	0	32	1
Scn1a	19	2303	1	5	TSeries-05062019-1113-046	1p_400	1	400	0	32	0
Scn1a	19	2303	1	5	TSeries-05062019-1113-047	1p_200	1	200	0	32	0
Scn1a	19	2303	1	5	TSeries-05062019-1113-048	1p_100	1	100	0	32	0
Scn1a	19	2303	1	5	TSeries-05062019-1113-049	1p_50	1	50	0	32	1
Scn1a	19	2303	1	5	TSeries-05062019-1113-050	1p_25	1	25	0	32	1
Scn1a	19	2303	1	6	TSeries-05062019-1113-051	4p_400	4	400	0	22	5
Scn1a	19	2303	1	6	TSeries-05062019-1113-052	4p_200	4	200	0	22	1
Scn1a	19	2303	1	6	TSeries-05062019-1113-053	4p_100	4	100	0	22	0
Scn1a	19	2303	1	6	TSeries-05062019-1113-054	4p_50	4	50	0	22	0
Scn1a	19	2303	1	6	TSeries-05062019-1113-055	4p_25	4	25	0	22	0
Scn1a	19	2303	1	6	TSeries-05062019-1113-056	1p_400	1	400	0	22	3
Scn1a	19	2303	1	6	TSeries-05062019-1113-057	1p_200	1	200	0	22	1
Scn1a	19	2303	1	6	TSeries-05062019-1113-058	1p_100	1	100	0	22	0
Scn1a	19	2303	1	6	TSeries-05062019-1113-059	1p_50	1	50	0	22	0
Scn1a	19	2303	1	6	TSeries-05062019-1113-060	1p_25	1	25	0	22	0
Scn1a	19	2303	2	7	TSeries-05062019-1113-061	4p_400	4	400	0	20	2
Scn1a	19	2303	2	7	TSeries-05062019-1113-062	4p_200	4	200	0	20	0
Scn1a	19	2303	2	7	TSeries-05062019-1113-063	4p_100	4	100	0	20	1
Scn1a	19	2303	2	7	TSeries-05062019-1113-064	4p_50	4	50	0	20	0
Scn1a	19	2303	2	7	TSeries-05062019-1113-065	4p_25	4	25	0	20	6
Scn1a	19	2303	2	7	TSeries-05062019-1113-066	1p_400	1	400	0	20	0
Scn1a	19	2303	2	7	TSeries-05062019-1113-067	1p_200	1	200	0	20	0
Scn1a	19	2303	2	7	TSeries-05062019-1113-068	1p_100	1	100	0	20	0
Scn1a	19	2303	2	7	TSeries-05062019-1113-069	1p_50	1	50	0	20	1
Scn1a	19	2303	2	7	TSeries-05062019-1113-070	1p_25	1	25	0	20	0
Scn1a	19	2303	3	8	TSeries-05062019-1113-071	4p_400	4	400	0	40	37
Scn1a	19	2303	3	8	TSeries-05062019-1113-072	4p_200	4	200	0	40	29
Scn1a	19	2303	3	8	TSeries-05062019-1113-073	4p_100	4	100	0	40	7
Scn1a	19	2303	3	8	TSeries-05062019-1113-074	4p_50	4	50	0	40	0
Scn1a	19	2303	3	8	TSeries-05062019-1113-075	4p_25	4	25	0	40	0
Scn1a	19	2303	3	8	TSeries-05062019-1113-076	1p_400	1	400	0	40	11
Scn1a	19	2303	3	8	TSeries-05062019-1113-077	1p_200	1	200	0	40	3
Scn1a	19	2303	3	8	TSeries-05062019-1113-078	1p_100	1	100	0	40	0
Scn1a	19	2303	3	8	TSeries-05062019-1113-079	1p_50	1	50	0	40	0
Scn1a	19	2303	3	8	TSeries-05062019-1113-080	1p_25	1	25	0	40	1
Scn1a	19	2303	3	9	TSeries-05062019-1113-081	4p_400	4	400	0	44	31
Scn1a	19	2303	3	9	TSeries-05062019-1113-082	4p_200	4	200	0	44	21
Scn1a	19	2303	3	9	TSeries-05062019-1113-083	4p_100	4	100	0	44	3
Scn1a	19	2303	3	9	TSeries-05062019-1113-084	4p_50	4	50	0	44	0
Scn1a	19	2303	3	9	TSeries-05062019-1113-085	4p_25	4	25	0	44	0
Scn1a	19	2303	3	9	TSeries-05062019-1113-086	1p_400	1	400	0	44	4
Scn1a	19	2303	3	9	TSeries-05062019-1113-087	1p_200	1	200	0	44	0
Scn1a	19	2303	3	9	TSeries-05062019-1113-088	1p_100	1	100	0	44	1
Scn1a	19	2303	3	9	TSeries-05062019-1113-089	1p_50	1	50	0	44	1
Scn1a	19	2303	3	9	TSeries-05062019-1113-090	1p_25	1	25	0	44	0
Scn1a	19	2303	3	10	TSeries-05062019-1113-091	4p_400	4	400	0	24	17
Scn1a	19	2303	3	10	TSeries-05062019-1113-092	4p_200	4	200	0	24	11
Scn1a	19	2303	3	10	TSeries-05062019-1113-093	4p_100	4	100	0	24	1
Scn1a	19	2303	3	10	TSeries-05062019-1113-094	4p_50	4	50	0	24	0
Scn1a	19	2303	3	10	TSeries-05062019-1113-095	4p_25	4	25	0	24	0
Scn1a	19	2303	3	10	TSeries-05062019-1113-096	1p_400	1	400	0	24	0
Scn1a	19	2303	3	10	TSeries-05062019-1113-097	1p_200	1	200	0	24	1
Scn1a	19	2303	3	10	TSeries-05062019-1113-098	1p_100	1	100	0	24	0
Scn1a	19	2303	3	10	TSeries-05062019-1113-099	1p_50	1	50	0	24	0
Scn1a	19	2303	3	10	TSeries-05062019-1113-100	1p_25	1	25	0	24	1
Scn1a	21	2305	1	1	TSeries-05082019-1008-051	4p_400	4	400	0	32	32
Scn1a	21	2305	1	1	TSeries-05082019-1008-052	4p_200	4	200	0	32	30
Scn1a	21	2305	1	1	TSeries-05082019-1008-053	4p_100	4	100	0	32	0
Scn1a	21	2305	1	1	TSeries-05082019-1008-054	4p_50	4	50	0	32	0
Scn1a	21	2305	1	1	TSeries-05082019-1008-055	4p_25	4	25	0	32	0
Scn1a	21	2305	1	1	TSeries-05082019-1008-056	1p_400	1	400	0	32	0
Scn1a	21	2305	1	1	TSeries-05082019-1008-057	1p_200	1	200	0	32	0
Scn1a	21	2305	1	1	TSeries-05082019-1008-058	1p_100	1	100	0	32	0
Scn1a	21	2305	1	1	TSeries-05082019-1008-059	1p_50	1	50	0	32	0
Scn1a	21	2305	1	1	TSeries-05082019-1008-060	1p_25	1	25	0	32	0
Scn1a	21	2305	1	2	TSeries-05082019-1008-061	4p_400	4	400	0	24	24
Scn1a	21	2305	1	2	TSeries-05082019-1008-062	4p_200	4	200	0	24	24
Scn1a	21	2305	1	2	TSeries-05082019-1008-063	4p_100	4	100	0	24	20
Scn1a	21	2305	1	2	TSeries-05082019-1008-064	4p_50	4	50	0	24	1
Scn1a	21	2305	1	2	TSeries-05082019-1008-065	4p_25	4	25	0	24	0
Scn1a	21	2305	1	2	TSeries-05082019-1008-066	1p_400	1	400	0	24	23
Scn1a	21	2305	1	2	TSeries-05082019-1008-067	1p_200	1	200	0	24	24
Scn1a	21	2305	1	2	TSeries-05082019-1008-068	1p_100	1	100	0	24	12
Scn1a	21	2305	1	2	TSeries-05082019-1008-069	1p_50	1	50	0	24	2
Scn1a	21	2305	1	2	TSeries-05082019-1008-070	1p_25	1	25	0	24	0
Scn1a	21	2305	1	4	TSeries-05082019-1008-081	4p_400	4	400	0	34	34
Scn1a	21	2305	1	4	TSeries-05082019-1008-082	4p_200	4	200	0	34	33
Scn1a	21	2305	1	4	TSeries-05082019-1008-083	4p_100	4	100	0	34	25
Scn1a	21	2305	1	4	TSeries-05082019-1008-084	4p_50	4	50	0	34	5
Scn1a	21	2305	1	4	TSeries-05082019-1008-085	4p_25	4	25	0	34	0
Scn1a	21	2305	1	4	TSeries-05082019-1008-086	1p_400	1	400	0	34	34
Scn1a	21	2305	1	4	TSeries-05082019-1008-087	1p_200	1	200	0	34	29
Scn1a	21	2305	1	4	TSeries-05082019-1008-088	1p_100	1	100	0	34	20
Scn1a	21	2305	1	4	TSeries-05082019-1008-089	1p_50	1	50	0	34	1
Scn1a	21	2305	1	4	TSeries-05082019-1008-090	1p_25	1	25	0	34	0
Scn1a	21	2305	1	6	TSeries-05082019-1008-101	4p_400	4	400	0	19	16
Scn1a	21	2305	1	6	TSeries-05082019-1008-102	4p_200	4	200	0	19	8
Scn1a	21	2305	1	6	TSeries-05082019-1008-103	4p_100	4	100	0	19	1
Scn1a	21	2305	1	6	TSeries-05082019-1008-104	4p_50	4	50	0	19	0
Scn1a	21	2305	1	6	TSeries-05082019-1008-105	4p_25	4	25	0	19	0
Scn1a	21	2305	1	6	TSeries-05082019-1008-106	1p_400	1	400	0	19	10
Scn1a	21	2305	1	6	TSeries-05082019-1008-107	1p_200	1	200	0	19	0
Scn1a	21	2305	1	6	TSeries-05082019-1008-108	1p_100	1	100	0	19	0
Scn1a	21	2305	1	6	TSeries-05082019-1008-109	1p_50	1	50	0	19	2
Scn1a	21	2305	1	6	TSeries-05082019-1008-110	1p_25	1	25	0	19	0
Scn1a	21	2305	1	7	TSeries-05082019-1008-111	4p_400	4	400	0	24	24
Scn1a	21	2305	1	7	TSeries-05082019-1008-112	4p_200	4	200	0	24	22
Scn1a	21	2305	1	7	TSeries-05082019-1008-113	4p_100	4	100	0	24	14
Scn1a	21	2305	1	7	TSeries-05082019-1008-114	4p_50	4	50	0	24	2
Scn1a	21	2305	1	7	TSeries-05082019-1008-115	4p_25	4	25	0	24	0
Scn1a	21	2305	1	7	TSeries-05082019-1008-116	1p_400	1	400	0	24	22
Scn1a	21	2305	1	7	TSeries-05082019-1008-117	1p_200	1	200	0	24	16
Scn1a	21	2305	1	7	TSeries-05082019-1008-118	1p_100	1	100	0	24	8
Scn1a	21	2305	1	7	TSeries-05082019-1008-119	1p_50	1	50	0	24	0
Scn1a	21	2305	1	7	TSeries-05082019-1008-120	1p_25	1	25	0	24	0
Scn1a	21	2305	2	9	TSeries-05082019-1646-131	4p_400	4	400	0	33	33
Scn1a	21	2305	2	9	TSeries-05082019-1646-132	4p_200	4	200	0	33	28
Scn1a	21	2305	2	9	TSeries-05082019-1646-133	4p_100	4	100	0	33	0
Scn1a	21	2305	2	9	TSeries-05082019-1646-134	4p_50	4	50	0	33	1
Scn1a	21	2305	2	9	TSeries-05082019-1646-135	4p_25	4	25	0	33	0
Scn1a	21	2305	2	9	TSeries-05082019-1646-136	1p_400	1	400	0	33	26
Scn1a	21	2305	2	9	TSeries-05082019-1646-137	1p_200	1	200	0	33	16
Scn1a	21	2305	2	9	TSeries-05082019-1646-138	1p_100	1	100	0	33	0
Scn1a	21	2305	2	9	TSeries-05082019-1646-139	1p_50	1	50	0	33	0
Scn1a	21	2305	2	9	TSeries-05082019-1646-140	1p_25	1	25	0	33	0
Scn1a	21	2305	2	10	TSeries-05082019-1646-141	4p_400	4	400	0	43	43
Scn1a	21	2305	2	10	TSeries-05082019-1646-142	4p_200	4	200	0	43	39
Scn1a	21	2305	2	10	TSeries-05082019-1646-143	4p_100	4	100	0	43	0
Scn1a	21	2305	2	10	TSeries-05082019-1646-144	4p_50	4	50	0	43	0
Scn1a	21	2305	2	10	TSeries-05082019-1646-145	4p_25	4	25	0	43	0
Scn1a	21	2305	2	10	TSeries-05082019-1646-146	1p_400	1	400	0	43	0
Scn1a	21	2305	2	10	TSeries-05082019-1646-147	1p_200	1	200	0	43	0
Scn1a	21	2305	2	10	TSeries-05082019-1646-148	1p_100	1	100	0	43	0
Scn1a	21	2305	2	10	TSeries-05082019-1646-149	1p_50	1	50	0	43	0
Scn1a	21	2305	2	10	TSeries-05082019-1646-150	1p_25	1	25	0	43	0
Scn1a	21	2305	2	11	TSeries-05082019-1646-151	4p_400	4	400	0	32	32
Scn1a	21	2305	2	11	TSeries-05082019-1646-152	4p_200	4	200	0	32	30
Scn1a	21	2305	2	11	TSeries-05082019-1646-153	4p_100	4	100	0	32	0
Scn1a	21	2305	2	11	TSeries-05082019-1646-154	4p_50	4	50	0	32	0
Scn1a	21	2305	2	11	TSeries-05082019-1646-155	4p_25	4	25	0	32	0
Scn1a	21	2305	2	11	TSeries-05082019-1646-156	1p_400	1	400	0	32	0
Scn1a	21	2305	2	11	TSeries-05082019-1646-157	1p_200	1	200	0	32	0
Scn1a	21	2305	2	11	TSeries-05082019-1646-158	1p_100	1	100	0	32	0
Scn1a	21	2305	2	11	TSeries-05082019-1646-159	1p_50	1	50	0	32	0
Scn1a	21	2305	2	11	TSeries-05082019-1646-160	1p_25	1	25	0	32	0
Scn1a	16	2577	1	1	TSeries-06262019-1349-001	4p_400	4	400	0	15	8
Scn1a	16	2577	1	1	TSeries-06262019-1349-002	4p_200	4	200	0	15	3
Scn1a	16	2577	1	1	TSeries-06262019-1349-003	4p_100	4	100	0	15	1
Scn1a	16	2577	1	1	TSeries-06262019-1349-004	4p_50	4	50	0	15	0
Scn1a	16	2577	1	1	TSeries-06262019-1349-005	4p_25	4	25	0	15	0
Scn1a	16	2577	1	1	TSeries-06262019-1349-006	1p_400	1	400	0	15	6
Scn1a	16	2577	1	1	TSeries-06262019-1349-007	1p_200	1	200	0	15	2
Scn1a	16	2577	1	1	TSeries-06262019-1349-008	1p_100	1	100	0	15	1
Scn1a	16	2577	1	1	TSeries-06262019-1349-009	1p_50	1	50	0	15	3
Scn1a	16	2577	1	1	TSeries-06262019-1349-010	1p_25	1	25	0	15	0
Scn1a	16	2577	2	2	TSeries-06262019-1349-011	4p_400	4	400	0	14	8
Scn1a	16	2577	2	2	TSeries-06262019-1349-012	4p_200	4	200	0	14	3
Scn1a	16	2577	2	2	TSeries-06262019-1349-013	4p_100	4	100	0	14	0
Scn1a	16	2577	2	2	TSeries-06262019-1349-014	4p_50	4	50	0	14	0
Scn1a	16	2577	2	2	TSeries-06262019-1349-015	4p_25	4	25	0	14	0
Scn1a	16	2577	2	2	TSeries-06262019-1349-016	1p_400	1	400	0	14	5
Scn1a	16	2577	2	2	TSeries-06262019-1349-017	1p_200	1	200	0	14	0
Scn1a	16	2577	2	2	TSeries-06262019-1349-018	1p_100	1	100	0	14	0
Scn1a	16	2577	2	2	TSeries-06262019-1349-019	1p_50	1	50	0	14	0
Scn1a	16	2577	2	2	TSeries-06262019-1349-020	1p_25	1	25	0	14	0
Scn1a	16	2577	3	3	TSeries-06262019-1349-021	4p_400	4	400	0	17	11
Scn1a	16	2577	3	3	TSeries-06262019-1349-022	4p_200	4	200	0	17	9
Scn1a	16	2577	3	3	TSeries-06262019-1349-023	4p_100	4	100	0	17	2
Scn1a	16	2577	3	3	TSeries-06262019-1349-024	4p_50	4	50	0	17	1
Scn1a	16	2577	3	3	TSeries-06262019-1349-025	4p_25	4	25	0	17	1
Scn1a	16	2577	3	3	TSeries-06262019-1349-026	1p_400	1	400	0	17	8
Scn1a	16	2577	3	3	TSeries-06262019-1349-027	1p_200	1	200	0	17	4
Scn1a	16	2577	3	3	TSeries-06262019-1349-028	1p_100	1	100	0	17	2
Scn1a	16	2577	3	3	TSeries-06262019-1349-029	1p_50	1	50	0	17	0
Scn1a	16	2577	3	3	TSeries-06262019-1349-030	1p_25	1	25	0	17	1
Scn1a	16	2577	3	4	TSeries-06262019-1349-031	4p_400	4	400	0	17	11
Scn1a	16	2577	3	4	TSeries-06262019-1349-032	4p_200	4	200	0	17	5
Scn1a	16	2577	3	4	TSeries-06262019-1349-033	4p_100	4	100	0	17	0
Scn1a	16	2577	3	4	TSeries-06262019-1349-034	4p_50	4	50	0	17	0
Scn1a	16	2577	3	4	TSeries-06262019-1349-035	4p_25	4	25	0	17	0
Scn1a	16	2577	3	4	TSeries-06262019-1349-036	1p_400	1	400	0	17	10
Scn1a	16	2577	3	4	TSeries-06262019-1349-037	1p_200	1	200	0	17	2
Scn1a	16	2577	3	4	TSeries-06262019-1349-038	1p_100	1	100	0	17	0
Scn1a	16	2577	3	4	TSeries-06262019-1349-039	1p_50	1	50	0	17	1
Scn1a	16	2577	3	4	TSeries-06262019-1349-040	1p_25	1	25	0	17	0
Scn1a	18	2585	1	1	TSeries-06282019-0910-001	4p_400	4	400	0	28	28
Scn1a	18	2585	1	1	TSeries-06282019-0910-002	4p_200	4	200	0	28	21
Scn1a	18	2585	1	1	TSeries-06282019-0910-003	4p_100	4	100	0	28	1
Scn1a	18	2585	1	1	TSeries-06282019-0910-004	4p_50	4	50	0	28	0
Scn1a	18	2585	1	1	TSeries-06282019-0910-005	4p_25	4	25	0	28	0
Scn1a	18	2585	1	1	TSeries-06282019-0910-006	1p_400	1	400	0	28	25
Scn1a	18	2585	1	1	TSeries-06282019-0910-007	1p_200	1	200	0	28	14
Scn1a	18	2585	1	1	TSeries-06282019-0910-008	1p_100	1	100	0	28	1
Scn1a	18	2585	1	1	TSeries-06282019-0910-009	1p_50	1	50	0	28	2
Scn1a	18	2585	1	1	TSeries-06282019-0910-010	1p_25	1	25	0	28	0
Scn1a	18	2585	1	2	TSeries-06282019-0910-011	4p_400	4	400	0	22	20
Scn1a	18	2585	1	2	TSeries-06282019-0910-012	4p_200	4	200	0	22	11
Scn1a	18	2585	1	2	TSeries-06282019-0910-013	4p_100	4	100	0	22	6
Scn1a	18	2585	1	2	TSeries-06282019-0910-014	4p_50	4	50	0	22	2
Scn1a	18	2585	1	2	TSeries-06282019-0910-015	4p_25	4	25	0	22	0
Scn1a	18	2585	1	2	TSeries-06282019-0910-016	1p_400	1	400	0	22	18
Scn1a	18	2585	1	2	TSeries-06282019-0910-017	1p_200	1	200	0	22	12
Scn1a	18	2585	1	2	TSeries-06282019-0910-018	1p_100	1	100	0	22	3
Scn1a	18	2585	1	2	TSeries-06282019-0910-019	1p_50	1	50	0	22	1
Scn1a	18	2585	1	2	TSeries-06282019-0910-020	1p_25	1	25	0	22	0
Scn1a	18	2585	1	3	TSeries-06282019-0910-021	4p_400	4	400	0	23	23
Scn1a	18	2585	1	3	TSeries-06282019-0910-022	4p_200	4	200	0	23	23
Scn1a	18	2585	1	3	TSeries-06282019-0910-023	4p_100	4	100	0	23	4
Scn1a	18	2585	1	3	TSeries-06282019-0910-024	4p_50	4	50	0	23	0
Scn1a	18	2585	1	3	TSeries-06282019-0910-025	4p_25	4	25	0	23	0
Scn1a	18	2585	1	3	TSeries-06282019-0910-026	1p_400	1	400	0	23	23
Scn1a	18	2585	1	3	TSeries-06282019-0910-027	1p_200	1	200	0	23	20
Scn1a	18	2585	1	3	TSeries-06282019-0910-028	1p_100	1	100	0	23	5
Scn1a	18	2585	1	3	TSeries-06282019-0910-029	1p_50	1	50	0	23	1
Scn1a	18	2585	1	3	TSeries-06282019-0910-030	1p_25	1	25	0	23	0
Scn1a	18	2585	2	4	TSeries-06282019-0910-041	4p_400	4	400	0	16	12
Scn1a	18	2585	2	4	TSeries-06282019-0910-042	4p_200	4	200	0	16	7
Scn1a	18	2585	2	4	TSeries-06282019-0910-043	4p_100	4	100	0	16	0
Scn1a	18	2585	2	4	TSeries-06282019-0910-044	4p_50	4	50	0	16	1
Scn1a	18	2585	2	4	TSeries-06282019-0910-045	4p_25	4	25	0	16	0
Scn1a	18	2585	2	4	TSeries-06282019-0910-046	1p_400	1	400	0	16	8
Scn1a	18	2585	2	4	TSeries-06282019-0910-047	1p_200	1	200	0	16	3
Scn1a	18	2585	2	4	TSeries-06282019-0910-048	1p_100	1	100	0	16	0
Scn1a	18	2585	2	4	TSeries-06282019-0910-049	1p_50	1	50	0	16	0
Scn1a	18	2585	2	4	TSeries-06282019-0910-050	1p_25	1	25	0	16	0
Scn1a	18	2585	2	5	TSeries-06282019-0910-051	4p_400	4	400	0	23	11
Scn1a	18	2585	2	5	TSeries-06282019-0910-052	4p_200	4	200	0	23	5
Scn1a	18	2585	2	5	TSeries-06282019-0910-053	4p_100	4	100	0	23	0
Scn1a	18	2585	2	5	TSeries-06282019-0910-054	4p_50	4	50	0	23	0
Scn1a	18	2585	2	5	TSeries-06282019-0910-055	4p_25	4	25	0	23	0
Scn1a	18	2585	2	5	TSeries-06282019-0910-056	1p_400	1	400	0	23	6
Scn1a	18	2585	2	5	TSeries-06282019-0910-057	1p_200	1	200	0	23	0
Scn1a	18	2585	2	5	TSeries-06282019-0910-058	1p_100	1	100	0	23	0
Scn1a	18	2585	2	5	TSeries-06282019-0910-059	1p_50	1	50	0	23	0
Scn1a	18	2585	2	5	TSeries-06282019-0910-060	1p_25	1	25	0	23	0
Scn1a	18	4694	1	1	TSeries-09132021-1054-001	4p_400	4	400	1	42	25
Scn1a	18	4694	1	1	TSeries-09132021-1054-002	4p_200	4	200	1	42	4
Scn1a	18	4694	1	1	TSeries-09132021-1054-003	4p_100	4	100	1	42	1
Scn1a	18	4694	1	1	TSeries-09132021-1054-004	4p_50	4	50	1	42	0
Scn1a	18	4694	1	1	TSeries-09132021-1054-005	4p_25	4	25	1	42	1
Scn1a	18	4694	1	1	TSeries-09132021-1054-006	1p_400	1	400	1	42	10
Scn1a	18	4694	1	1	TSeries-09132021-1054-007	1p_200	1	200	1	42	1
Scn1a	18	4694	1	1	TSeries-09132021-1054-008	1p_100	1	100	1	42	1
Scn1a	18	4694	1	1	TSeries-09132021-1054-009	1p_50	1	50	1	42	0
Scn1a	18	4694	1	1	TSeries-09132021-1054-010	1p_25	1	25	1	42	0
Scn1a	18	4694	1	1	TSeries-09132021-1054-011	4p_400 + PTX 5 min	4	400	1	42	31
Scn1a	18	4694	1	1	TSeries-09132021-1054-012	4p_400 + PTX 10 min	4	400	1	42	40
Scn1a	18	4694	2	2	TSeries-09132021-1054-013	4p_400	4	400	1	30	26
Scn1a	18	4694	2	2	TSeries-09132021-1054-014	4p_200	4	200	1	30	17
Scn1a	18	4694	2	2	TSeries-09132021-1054-015	4p_100	4	100	1	30	3
Scn1a	18	4694	2	2	TSeries-09132021-1054-016	4p_50	4	50	1	30	0
Scn1a	18	4694	2	2	TSeries-09132021-1054-017	4p_25	4	25	1	30	0
Scn1a	18	4694	2	2	TSeries-09132021-1054-018	1p_400	1	400	1	30	13
Scn1a	18	4694	2	2	TSeries-09132021-1054-019	1p_200	1	200	1	30	7
Scn1a	18	4694	2	2	TSeries-09132021-1054-020	1p_100	1	100	1	30	1
Scn1a	18	4694	2	2	TSeries-09132021-1054-021	1p_50	1	50	1	30	0
Scn1a	18	4694	2	2	TSeries-09132021-1054-022	1p_25	1	25	1	30	0
Scn1a	18	4694	2	2	TSeries-09132021-1054-023	4p_400 + PTX 5 min	4	400	1	30	29
Scn1a	18	4694	2	2	TSeries-09132021-1054-024	4p_400 + PTX 10 min	4	400	1	30	30
Scn1a	18	4694	3	3	TSeries-09132021-1054-025	4p_400	4	400	1	31	21
Scn1a	18	4694	3	3	TSeries-09132021-1054-026	4p_200	4	200	1	31	0
Scn1a	18	4694	3	3	TSeries-09132021-1054-027	4p_100	4	100	1	31	0
Scn1a	18	4694	3	3	TSeries-09132021-1054-028	4p_50	4	50	1	31	0
Scn1a	18	4694	3	3	TSeries-09132021-1054-029	4p_25	4	25	1	31	0
Scn1a	18	4694	3	3	TSeries-09132021-1054-030	1p_400	1	400	1	31	2
Scn1a	18	4694	3	3	TSeries-09132021-1054-031	1p_200	1	200	1	31	0
Scn1a	18	4694	3	3	TSeries-09132021-1054-032	1p_100	1	100	1	31	0
Scn1a	18	4694	3	3	TSeries-09132021-1054-033	1p_50	1	50	1	31	0
Scn1a	18	4694	3	3	TSeries-09132021-1054-034	1p_25	1	25	1	31	0
Scn1a	18	4694	3	3	TSeries-09132021-1054-035	4p_400 + PTX 5 min	4	400	1	31	21
Scn1a	18	4694	3	3	TSeries-09132021-1054-036	4p_400 + PTX 10 min	4	400	1	31	30
Scn1a	19	4685	1	1	TSeries-09142021-1002-001	4p_400	4	400	1	14	3
Scn1a	19	4685	1	1	TSeries-09142021-1002-002	4p_200	4	200	1	14	2
Scn1a	19	4685	1	1	TSeries-09142021-1002-003	4p_100	4	100	1	14	1
Scn1a	19	4685	1	1	TSeries-09142021-1002-004	4p_50	4	50	1	14	0
Scn1a	19	4685	1	1	TSeries-09142021-1002-005	4p_25	4	25	1	14	0
Scn1a	19	4685	1	1	TSeries-09142021-1002-006	1p_400	1	400	1	14	0
Scn1a	19	4685	1	1	TSeries-09142021-1002-007	1p_200	1	200	1	14	0
Scn1a	19	4685	1	1	TSeries-09142021-1002-008	1p_100	1	100	1	14	1
Scn1a	19	4685	1	1	TSeries-09142021-1002-009	1p_50	1	50	1	14	0
Scn1a	19	4685	1	1	TSeries-09142021-1002-010	1p_25	1	25	1	14	0
Scn1a	19	4685	1	1	TSeries-09142021-1002-011	4p_400 + PTX 5 min	4	400	1	14	1
Scn1a	19	4685	1	1	TSeries-09142021-1002-012	4p_400 + PTX 10 min	4	400	1	14	1
Scn1a	19	4687	1	1	TSeries-09142021-1002-025	4p_400	4	400	1	12	10
Scn1a	19	4687	1	1	TSeries-09142021-1002-026	4p_200	4	200	1	12	11
Scn1a	19	4687	1	1	TSeries-09142021-1002-027	4p_100	4	100	1	12	4
Scn1a	19	4687	1	1	TSeries-09142021-1002-028	4p_50	4	50	1	12	4
Scn1a	19	4687	1	1	TSeries-09142021-1002-029	4p_25	4	25	1	12	0
Scn1a	19	4687	1	1	TSeries-09142021-1002-030	1p_400	1	400	1	12	9
Scn1a	19	4687	1	1	TSeries-09142021-1002-031	1p_200	1	200	1	12	2
Scn1a	19	4687	1	1	TSeries-09142021-1002-032	1p_100	1	100	1	12	2
Scn1a	19	4687	1	1	TSeries-09142021-1002-033	1p_50	1	50	1	12	1
Scn1a	19	4687	1	1	TSeries-09142021-1002-034	1p_25	1	25	1	12	0
Scn1a	19	4687	1	1	TSeries-09142021-1002-035	4p_400 + PTX 5 min	4	400	1	12	12
Scn1a	19	4687	1	1	TSeries-09142021-1002-036	4p_400 + PTX 10 min	4	400	1	12	11
Scn1a	19	4687	2	2	TSeries-09142021-1002-037	4p_400	4	400	1	39	37
Scn1a	19	4687	2	2	TSeries-09142021-1002-038	4p_200	4	200	1	39	37
Scn1a	19	4687	2	2	TSeries-09142021-1002-039	4p_100	4	100	1	39	16
Scn1a	19	4687	2	2	TSeries-09142021-1002-040	4p_50	4	50	1	39	3
Scn1a	19	4687	2	2	TSeries-09142021-1002-041	4p_25	4	25	1	39	1
Scn1a	19	4687	2	2	TSeries-09142021-1002-042	1p_400	1	400	1	39	23
Scn1a	19	4687	2	2	TSeries-09142021-1002-043	1p_200	1	200	1	39	14
Scn1a	19	4687	2	2	TSeries-09142021-1002-044	1p_100	1	100	1	39	6
Scn1a	19	4687	2	2	TSeries-09142021-1002-045	1p_50	1	50	1	39	0
Scn1a	19	4687	2	2	TSeries-09142021-1002-046	1p_25	1	25	1	39	0
Scn1a	19	4687	2	2	TSeries-09142021-1002-047	4p_400 + PTX 5 min	4	400	1	39	37
Scn1a	19	4687	2	2	TSeries-09142021-1002-048	4p_400 + PTX 10 min	4	400	1	39	39
Scn1a	19	4687	3	3	TSeries-09142021-1002-049	4p_400	4	400	1	24	24
Scn1a	19	4687	3	3	TSeries-09142021-1002-050	4p_200	4	200	1	24	24
Scn1a	19	4687	3	3	TSeries-09142021-1002-051	4p_100	4	100	1	24	23
Scn1a	19	4687	3	3	TSeries-09142021-1002-052	4p_50	4	50	1	24	19
Scn1a	19	4687	3	3	TSeries-09142021-1002-053	4p_25	4	25	1	24	0
Scn1a	19	4687	3	3	TSeries-09142021-1002-054	1p_400	1	400	1	24	22
Scn1a	19	4687	3	3	TSeries-09142021-1002-055	1p_200	1	200	1	24	20
Scn1a	19	4687	3	3	TSeries-09142021-1002-056	1p_100	1	100	1	24	12
Scn1a	19	4687	3	3	TSeries-09142021-1002-057	1p_50	1	50	1	24	1
Scn1a	19	4687	3	3	TSeries-09142021-1002-058	1p_25	1	25	1	24	0
Scn1a	19	4687	3	3	TSeries-09142021-1002-059	4p_400 + PTX 5 min	4	400	1	24	23
Scn1a	19	4687	3	3	TSeries-09142021-1002-060	4p_400 + PTX 10 min	4	400	1	24	24
Scn1a	19	4687	4	4	TSeries-09142021-1002-061	4p_400	4	400	1	33	30
Scn1a	19	4687	4	4	TSeries-09142021-1002-062	4p_200	4	200	1	33	18
Scn1a	19	4687	4	4	TSeries-09142021-1002-063	4p_100	4	100	1	33	6
Scn1a	19	4687	4	4	TSeries-09142021-1002-064	4p_50	4	50	1	33	0
Scn1a	19	4687	4	4	TSeries-09142021-1002-065	4p_25	4	25	1	33	1
Scn1a	19	4687	4	4	TSeries-09142021-1002-066	1p_400	1	400	1	33	24
Scn1a	19	4687	4	4	TSeries-09142021-1002-067	1p_200	1	200	1	33	9
Scn1a	19	4687	4	4	TSeries-09142021-1002-068	1p_100	1	100	1	33	3
Scn1a	19	4687	4	4	TSeries-09142021-1002-069	1p_50	1	50	1	33	0
Scn1a	19	4687	4	4	TSeries-09142021-1002-070	1p_25	1	25	1	33	1
Scn1a	19	4687	4	4	TSeries-09142021-1002-071	4p_400 + PTX 5 min	4	400	1	33	28
Scn1a	19	4687	4	4	TSeries-09142021-1002-072	4p_400 + PTX 10 min	4	400	1	33	31
Scn1a	19	4688	1	1	TSeries-09142021-1002-073	4p_400	4	400	1	23	23
Scn1a	19	4688	1	1	TSeries-09142021-1002-074	4p_200	4	200	1	23	21
Scn1a	19	4688	1	1	TSeries-09142021-1002-075	4p_100	4	100	1	23	16
Scn1a	19	4688	1	1	TSeries-09142021-1002-076	4p_50	4	50	1	23	2
Scn1a	19	4688	1	1	TSeries-09142021-1002-077	4p_25	4	25	1	23	0
Scn1a	19	4688	1	1	TSeries-09142021-1002-078	1p_400	1	400	1	23	23
Scn1a	19	4688	1	1	TSeries-09142021-1002-079	1p_200	1	200	1	23	14
Scn1a	19	4688	1	1	TSeries-09142021-1002-080	1p_100	1	100	1	23	4
Scn1a	19	4688	1	1	TSeries-09142021-1002-081	1p_50	1	50	1	23	0
Scn1a	19	4688	1	1	TSeries-09142021-1002-082	1p_25	1	25	1	23	0
Scn1a	19	4688	1	1	TSeries-09142021-1002-083	4p_400 + PTX 5 min	4	400	1	23	23
Scn1a	19	4688	1	1	TSeries-09142021-1002-084	4p_400 + PTX 10 min	4	400	1	23	23
Scn1a	19	4688	2	2	TSeries-09142021-1002-085	4p_400	4	400	1	18	15
Scn1a	19	4688	2	2	TSeries-09142021-1002-086	4p_200	4	200	1	18	11
Scn1a	19	4688	2	2	TSeries-09142021-1002-087	4p_100	4	100	1	18	5
Scn1a	19	4688	2	2	TSeries-09142021-1002-088	4p_50	4	50	1	18	1
Scn1a	19	4688	2	2	TSeries-09142021-1002-089	4p_25	4	25	1	18	0
Scn1a	19	4688	2	2	TSeries-09142021-1002-090	1p_400	1	400	1	18	7
Scn1a	19	4688	2	2	TSeries-09142021-1002-091	1p_200	1	200	1	18	4
Scn1a	19	4688	2	2	TSeries-09142021-1002-092	1p_100	1	100	1	18	1
Scn1a	19	4688	2	2	TSeries-09142021-1002-093	1p_50	1	50	1	18	0
Scn1a	19	4688	2	2	TSeries-09142021-1002-094	1p_25	1	25	1	18	0
Scn1a	19	4688	2	2	TSeries-09142021-1002-095	4p_400 + PTX 5 min	4	400	1	18	14
Scn1a	19	4688	2	2	TSeries-09142021-1002-096	4p_400 + PTX 10 min	4	400	1	18	15
Scn1a	19	4688	3	3	TSeries-09142021-1002-097	4p_400	4	400	1	22	22
Scn1a	19	4688	3	3	TSeries-09142021-1002-098	4p_200	4	200	1	22	22
Scn1a	19	4688	3	3	TSeries-09142021-1002-099	4p_100	4	100	1	22	22
Scn1a	19	4688	3	3	TSeries-09142021-1002-100	4p_50	4	50	1	22	16
Scn1a	19	4688	3	3	TSeries-09142021-1002-101	4p_25	4	25	1	22	3
Scn1a	19	4688	3	3	TSeries-09142021-1002-102	1p_400	1	400	1	22	20
Scn1a	19	4688	3	3	TSeries-09142021-1002-103	1p_200	1	200	1	22	16
Scn1a	19	4688	3	3	TSeries-09142021-1002-104	1p_100	1	100	1	22	11
Scn1a	19	4688	3	3	TSeries-09142021-1002-105	1p_50	1	50	1	22	3
Scn1a	19	4688	3	3	TSeries-09142021-1002-106	1p_25	1	25	1	22	0
Scn1a	19	4688	3	3	TSeries-09142021-1002-107	4p_400 + PTX 5 min	4	400	1	22	22
Scn1a	19	4688	3	3	TSeries-09142021-1002-108	4p_400 + PTX 10 min	4	400	1	22	21
Scn1a	19	4688	4	4	TSeries-09142021-1002-109	4p_400	4	400	1	25	25
Scn1a	19	4688	4	4	TSeries-09142021-1002-110	4p_200	4	200	1	25	7
Scn1a	19	4688	4	4	TSeries-09142021-1002-111	4p_100	4	100	1	25	0
Scn1a	19	4688	4	4	TSeries-09142021-1002-112	4p_50	4	50	1	25	0
Scn1a	19	4688	4	4	TSeries-09142021-1002-113	4p_25	4	25	1	25	0
Scn1a	19	4688	4	4	TSeries-09142021-1002-114	1p_400	1	400	1	25	13
Scn1a	19	4688	4	4	TSeries-09142021-1002-115	1p_200	1	200	1	25	1
Scn1a	19	4688	4	4	TSeries-09142021-1002-116	1p_100	1	100	1	25	1
Scn1a	19	4688	4	4	TSeries-09142021-1002-117	1p_50	1	50	1	25	0
Scn1a	19	4688	4	4	TSeries-09142021-1002-118	1p_25	1	25	1	25	0
Scn1a	19	4688	4	4	TSeries-09142021-1002-119	4p_400 + PTX 5 min	4	400	1	25	15
Scn1a	19	4688	4	4	TSeries-09142021-1002-120	4p_400 + PTX 10 min	4	400	1	25	20
Scn1a	19	4688	5	5	TSeries-09142021-1002-121	4p_400	4	400	1	41	37
Scn1a	19	4688	5	5	TSeries-09142021-1002-122	4p_200	4	200	1	41	37
Scn1a	19	4688	5	5	TSeries-09142021-1002-123	4p_100	4	100	1	41	19
Scn1a	19	4688	5	5	TSeries-09142021-1002-124	4p_50	4	50	1	41	1
Scn1a	19	4688	5	5	TSeries-09142021-1002-125	4p_25	4	25	1	41	0
Scn1a	19	4688	5	5	TSeries-09142021-1002-126	1p_400	1	400	1	41	15
Scn1a	19	4688	5	5	TSeries-09142021-1002-127	1p_200	1	200	1	41	6
Scn1a	19	4688	5	5	TSeries-09142021-1002-128	1p_100	1	100	1	41	1
Scn1a	19	4688	5	5	TSeries-09142021-1002-129	1p_50	1	50	1	41	1
Scn1a	19	4688	5	5	TSeries-09142021-1002-130	1p_25	1	25	1	41	0
Scn1a	19	4688	5	5	TSeries-09142021-1002-131	4p_400 + PTX 5 min	4	400	1	41	27
Scn1a	19	4688	5	5	TSeries-09142021-1002-132	4p_400 + PTX 10 min	4	400	1	41	34
Scn1a	21	4686	1	1	TSeries-09162021-1059-001	4p_400	4	400	1	26	24
Scn1a	21	4686	1	1	TSeries-09162021-1059-002	4p_200	4	200	1	26	24
Scn1a	21	4686	1	1	TSeries-09162021-1059-003	4p_100	4	100	1	26	8
Scn1a	21	4686	1	1	TSeries-09162021-1059-004	4p_50	4	50	1	26	3
Scn1a	21	4686	1	1	TSeries-09162021-1059-005	4p_25	4	25	1	26	6
Scn1a	21	4686	1	1	TSeries-09162021-1059-006	1p_400	1	400	1	26	9
Scn1a	21	4686	1	1	TSeries-09162021-1059-007	1p_200	1	200	1	26	12
Scn1a	21	4686	1	1	TSeries-09162021-1059-008	1p_100	1	100	1	26	4
Scn1a	21	4686	1	1	TSeries-09162021-1059-009	1p_50	1	50	1	26	0
Scn1a	21	4686	1	1	TSeries-09162021-1059-010	1p_25	1	25	1	26	4
Scn1a	21	4686	1	1	TSeries-09162021-1059-011	4p_400 + PTX 5 min	4	400	1	26	25
Scn1a	21	4686	1	1	TSeries-09162021-1059-012	4p_400 + PTX 10 min	4	400	1	26	24
Scn1a	21	4686	2	2	TSeries-09162021-1059-013	4p_400	4	400	1	27	27
Scn1a	21	4686	2	2	TSeries-09162021-1059-014	4p_200	4	200	1	27	9
Scn1a	21	4686	2	2	TSeries-09162021-1059-015	4p_100	4	100	1	27	1
Scn1a	21	4686	2	2	TSeries-09162021-1059-016	4p_50	4	50	1	27	1
Scn1a	21	4686	2	2	TSeries-09162021-1059-017	4p_25	4	25	1	27	0
Scn1a	21	4686	2	2	TSeries-09162021-1059-018	1p_400	1	400	1	27	11
Scn1a	21	4686	2	2	TSeries-09162021-1059-019	1p_200	1	200	1	27	1
Scn1a	21	4686	2	2	TSeries-09162021-1059-020	1p_100	1	100	1	27	1
Scn1a	21	4686	2	2	TSeries-09162021-1059-021	1p_50	1	50	1	27	0
Scn1a	21	4686	2	2	TSeries-09162021-1059-022	1p_25	1	25	1	27	1
Scn1a	21	4686	2	2	TSeries-09162021-1059-023	4p_400 + PTX 5 min	4	400	1	27	26
Scn1a	21	4686	2	2	TSeries-09162021-1059-024	4p_400 + PTX 10 min	4	400	1	27	27
Scn1a	21	4686	3	3	TSeries-09162021-1059-025	4p_400	4	400	1	16	16
Scn1a	21	4686	3	3	TSeries-09162021-1059-026	4p_200	4	200	1	16	14
Scn1a	21	4686	3	3	TSeries-09162021-1059-027	4p_100	4	100	1	16	4
Scn1a	21	4686	3	3	TSeries-09162021-1059-028	4p_50	4	50	1	16	1
Scn1a	21	4686	3	3	TSeries-09162021-1059-029	4p_25	4	25	1	16	0
Scn1a	21	4686	3	3	TSeries-09162021-1059-030	1p_400	1	400	1	16	4
Scn1a	21	4686	3	3	TSeries-09162021-1059-031	1p_200	1	200	1	16	2
Scn1a	21	4686	3	3	TSeries-09162021-1059-032	1p_100	1	100	1	16	1
Scn1a	21	4686	3	3	TSeries-09162021-1059-033	1p_50	1	50	1	16	2
Scn1a	21	4686	3	3	TSeries-09162021-1059-034	1p_25	1	25	1	16	0
Scn1a	21	4686	3	3	TSeries-09162021-1059-035	4p_400 + PTX 5 min	4	400	1	16	16
Scn1a	21	4686	3	3	TSeries-09162021-1059-036	4p_400 + PTX 10 min	4	400	1	16	16
Scn1a	21	4686	4	4	TSeries-09162021-1059-037	4p_400	4	400	1	22	17
Scn1a	21	4686	4	4	TSeries-09162021-1059-038	4p_200	4	200	1	22	4
Scn1a	21	4686	4	4	TSeries-09162021-1059-039	4p_100	4	100	1	22	1
Scn1a	21	4686	4	4	TSeries-09162021-1059-040	4p_50	4	50	1	22	0
Scn1a	21	4686	4	4	TSeries-09162021-1059-041	4p_25	4	25	1	22	0
Scn1a	21	4686	4	4	TSeries-09162021-1059-042	1p_400	1	400	1	22	9
Scn1a	21	4686	4	4	TSeries-09162021-1059-043	1p_200	1	200	1	22	0
Scn1a	21	4686	4	4	TSeries-09162021-1059-044	1p_100	1	100	1	22	0
Scn1a	21	4686	4	4	TSeries-09162021-1059-045	1p_50	1	50	1	22	0
Scn1a	21	4686	4	4	TSeries-09162021-1059-046	1p_25	1	25	1	22	2
Scn1a	21	4686	4	4	TSeries-09162021-1059-047	4p_400 + PTX 5 min	4	400	1	22	20
Scn1a	21	4686	4	4	TSeries-09162021-1059-048	4p_400 + PTX 10 min	4	400	1	22	17
WT	15	2137	1	1	TSeries-03092019-0946-001	4p_400	4	400	0	15	13
WT	15	2137	1	1	TSeries-03092019-0946-002	4p_200	4	200	0	15	6
WT	15	2137	1	1	TSeries-03092019-0946-003	4p_100	4	100	0	15	0
WT	15	2137	1	1	TSeries-03092019-0946-004	4p_50	4	50	0	15	0
WT	15	2137	1	1	TSeries-03092019-0946-005	4p_25	4	25	0	15	0
WT	15	2137	1	1	TSeries-03092019-0946-006	1p_400	1	400	0	15	14
WT	15	2137	1	1	TSeries-03092019-0946-007	1p_200	1	200	0	15	3
WT	15	2137	1	1	TSeries-03092019-0946-008	1p_100	1	100	0	15	0
WT	15	2137	1	1	TSeries-03092019-0946-009	1p_50	1	50	0	15	0
WT	15	2137	1	1	TSeries-03092019-0946-010	1p_25	1	25	0	15	0
WT	15	2137	1	2	TSeries-03092019-0946-011	4p_400	4	400	0	16	14
WT	15	2137	1	2	TSeries-03092019-0946-012	4p_200	4	200	0	16	10
WT	15	2137	1	2	TSeries-03092019-0946-013	4p_100	4	100	0	16	0
WT	15	2137	1	2	TSeries-03092019-0946-014	4p_50	4	50	0	16	0
WT	15	2137	1	2	TSeries-03092019-0946-015	4p_25	4	25	0	16	1
WT	15	2137	1	2	TSeries-03092019-0946-016	1p_400	1	400	0	16	7
WT	15	2137	1	2	TSeries-03092019-0946-017	1p_200	1	200	0	16	3
WT	15	2137	1	2	TSeries-03092019-0946-018	1p_100	1	100	0	16	0
WT	15	2137	1	2	TSeries-03092019-0946-019	1p_50	1	50	0	16	0
WT	15	2137	1	2	TSeries-03092019-0946-020	1p_25	1	25	0	16	0
WT	15	2137	1	3	TSeries-03092019-0946-021	4p_400	4	400	0	14	11
WT	15	2137	1	3	TSeries-03092019-0946-022	4p_200	4	200	0	14	6
WT	15	2137	1	3	TSeries-03092019-0946-023	4p_100	4	100	0	14	0
WT	15	2137	1	3	TSeries-03092019-0946-024	4p_50	4	50	0	14	0
WT	15	2137	1	3	TSeries-03092019-0946-025	4p_25	4	25	0	14	0
WT	15	2137	1	3	TSeries-03092019-0946-026	1p_400	1	400	0	14	7
WT	15	2137	1	3	TSeries-03092019-0946-027	1p_200	1	200	0	14	2
WT	15	2137	1	3	TSeries-03092019-0946-028	1p_100	1	100	0	14	0
WT	15	2137	1	3	TSeries-03092019-0946-029	1p_50	1	50	0	14	0
WT	15	2137	1	3	TSeries-03092019-0946-030	1p_25	1	25	0	14	0
WT	15	2137	2	4	TSeries-03092019-0946-031	4p_400	4	400	0	12	1
WT	15	2137	2	4	TSeries-03092019-0946-032	4p_200	4	200	0	12	1
WT	15	2137	2	4	TSeries-03092019-0946-033	4p_100	4	100	0	12	0
WT	15	2137	2	4	TSeries-03092019-0946-034	4p_50	4	50	0	12	1
WT	15	2137	2	4	TSeries-03092019-0946-035	4p_25	4	25	0	12	0
WT	15	2137	2	4	TSeries-03092019-0946-036	1p_400	1	400	0	12	0
WT	15	2137	2	4	TSeries-03092019-0946-037	1p_200	1	200	0	12	0
WT	15	2137	2	4	TSeries-03092019-0946-038	1p_100	1	100	0	12	0
WT	15	2137	2	4	TSeries-03092019-0946-039	1p_50	1	50	0	12	0
WT	15	2137	2	4	TSeries-03092019-0946-040	1p_25	1	25	0	12	0
WT	15	2137	2	5	TSeries-03092019-0946-041	4p_400	4	400	0	16	0
WT	15	2137	2	5	TSeries-03092019-0946-042	4p_200	4	200	0	16	0
WT	15	2137	2	5	TSeries-03092019-0946-043	4p_100	4	100	0	16	0
WT	15	2137	2	5	TSeries-03092019-0946-044	4p_50	4	50	0	16	0
WT	15	2137	2	5	TSeries-03092019-0946-045	4p_25	4	25	0	16	0
WT	15	2137	2	5	TSeries-03092019-0946-046	1p_400	1	400	0	16	0
WT	15	2137	2	5	TSeries-03092019-0946-047	1p_200	1	200	0	16	0
WT	15	2137	2	5	TSeries-03092019-0946-048	1p_100	1	100	0	16	0
WT	15	2137	2	5	TSeries-03092019-0946-049	1p_50	1	50	0	16	0
WT	15	2137	2	5	TSeries-03092019-0946-050	1p_25	1	25	0	16	0
WT	16	2304	1	1	TSeries-05032019-0942-001	4p_400	4	400	0	5	0
WT	16	2304	1	1	TSeries-05032019-0942-002	4p_200	4	200	0	5	0
WT	16	2304	1	1	TSeries-05032019-0942-003	4p_100	4	100	0	5	0
WT	16	2304	1	1	TSeries-05032019-0942-004	4p_50	4	50	0	5	0
WT	16	2304	1	1	TSeries-05032019-0942-005	4p_25	4	25	0	5	0
WT	16	2304	1	1	TSeries-05032019-0942-006	1p_400	1	400	0	5	0
WT	16	2304	1	1	TSeries-05032019-0942-007	1p_200	1	200	0	5	0
WT	16	2304	1	1	TSeries-05032019-0942-008	1p_100	1	100	0	5	0
WT	16	2304	1	1	TSeries-05032019-0942-009	1p_50	1	50	0	5	0
WT	16	2304	1	1	TSeries-05032019-0942-010	1p_25	1	25	0	5	0
WT	16	2304	2	2	TSeries-05032019-0942-011	4p_400	4	400	0	7	1
WT	16	2304	2	2	TSeries-05032019-0942-012	4p_200	4	200	0	7	1
WT	16	2304	2	2	TSeries-05032019-0942-013	4p_100	4	100	0	7	1
WT	16	2304	2	2	TSeries-05032019-0942-014	4p_50	4	50	0	7	0
WT	16	2304	2	2	TSeries-05032019-0942-015	4p_25	4	25	0	7	0
WT	16	2304	2	2	TSeries-05032019-0942-016	1p_400	1	400	0	7	1
WT	16	2304	2	2	TSeries-05032019-0942-017	1p_200	1	200	0	7	1
WT	16	2304	2	2	TSeries-05032019-0942-018	1p_100	1	100	0	7	0
WT	16	2304	2	2	TSeries-05032019-0942-019	1p_50	1	50	0	7	0
WT	16	2304	2	2	TSeries-05032019-0942-020	1p_25	1	25	0	7	0
WT	16	2304	2	3	TSeries-05032019-0942-021	4p_400	4	400	0	11	2
WT	16	2304	2	3	TSeries-05032019-0942-022	4p_200	4	200	0	11	1
WT	16	2304	2	3	TSeries-05032019-0942-023	4p_100	4	100	0	11	0
WT	16	2304	2	3	TSeries-05032019-0942-024	4p_50	4	50	0	11	0
WT	16	2304	2	3	TSeries-05032019-0942-025	4p_25	4	25	0	11	0
WT	16	2304	2	3	TSeries-05032019-0942-026	1p_400	1	400	0	11	0
WT	16	2304	2	3	TSeries-05032019-0942-027	1p_200	1	200	0	11	0
WT	16	2304	2	3	TSeries-05032019-0942-028	1p_100	1	100	0	11	0
WT	16	2304	2	3	TSeries-05032019-0942-029	1p_50	1	50	0	11	0
WT	16	2304	2	3	TSeries-05032019-0942-030	1p_25	1	25	0	11	1
WT	16	2304	2	4	TSeries-05032019-0942-031	4p_400	4	400	0	20	10
WT	16	2304	2	4	TSeries-05032019-0942-032	4p_200	4	200	0	20	0
WT	16	2304	2	4	TSeries-05032019-0942-033	4p_100	4	100	0	20	0
WT	16	2304	2	4	TSeries-05032019-0942-034	4p_50	4	50	0	20	0
WT	16	2304	2	4	TSeries-05032019-0942-035	4p_25	4	25	0	20	0
WT	16	2304	2	4	TSeries-05032019-0942-036	1p_400	1	400	0	20	4
WT	16	2304	2	4	TSeries-05032019-0942-037	1p_200	1	200	0	20	0
WT	16	2304	2	4	TSeries-05032019-0942-038	1p_100	1	100	0	20	0
WT	16	2304	2	4	TSeries-05032019-0942-039	1p_50	1	50	0	20	1
WT	16	2304	2	4	TSeries-05032019-0942-040	1p_25	1	25	0	20	0
WT	16	2304	2	5	TSeries-05032019-0942-041	4p_400	4	400	0	9	3
WT	16	2304	2	5	TSeries-05032019-0942-042	4p_200	4	200	0	9	2
WT	16	2304	2	5	TSeries-05032019-0942-043	4p_100	4	100	0	9	0
WT	16	2304	2	5	TSeries-05032019-0942-044	4p_50	4	50	0	9	1
WT	16	2304	2	5	TSeries-05032019-0942-045	4p_25	4	25	0	9	0
WT	16	2304	2	5	TSeries-05032019-0942-046	1p_400	1	400	0	9	3
WT	16	2304	2	5	TSeries-05032019-0942-047	1p_200	1	200	0	9	1
WT	16	2304	2	5	TSeries-05032019-0942-048	1p_100	1	100	0	9	2
WT	16	2304	2	5	TSeries-05032019-0942-049	1p_50	1	50	0	9	0
WT	16	2304	2	5	TSeries-05032019-0942-050	1p_25	1	25	0	9	0
WT	16	2304	2	6	TSeries-05032019-0942-051	4p_400	4	400	0	14	4
WT	16	2304	2	6	TSeries-05032019-0942-052	4p_200	4	200	0	14	1
WT	16	2304	2	6	TSeries-05032019-0942-053	4p_100	4	100	0	14	1
WT	16	2304	2	6	TSeries-05032019-0942-054	4p_50	4	50	0	14	0
WT	16	2304	2	6	TSeries-05032019-0942-055	4p_25	4	25	0	14	0
WT	16	2304	2	6	TSeries-05032019-0942-056	1p_400	1	400	0	14	1
WT	16	2304	2	6	TSeries-05032019-0942-057	1p_200	1	200	0	14	0
WT	16	2304	2	6	TSeries-05032019-0942-058	1p_100	1	100	0	14	0
WT	16	2304	2	6	TSeries-05032019-0942-059	1p_50	1	50	0	14	0
WT	16	2304	2	6	TSeries-05032019-0942-060	1p_25	1	25	0	14	0
WT	16	2304	3	7	TSeries-05032019-0942-061	4p_400	4	400	0	20	3
WT	16	2304	3	7	TSeries-05032019-0942-062	4p_200	4	200	0	20	1
WT	16	2304	3	7	TSeries-05032019-0942-063	4p_100	4	100	0	20	0
WT	16	2304	3	7	TSeries-05032019-0942-064	4p_50	4	50	0	20	0
WT	16	2304	3	7	TSeries-05032019-0942-065	4p_25	4	25	0	20	0
WT	16	2304	3	7	TSeries-05032019-0942-066	1p_400	1	400	0	20	0
WT	16	2304	3	7	TSeries-05032019-0942-067	1p_200	1	200	0	20	0
WT	16	2304	3	7	TSeries-05032019-0942-068	1p_100	1	100	0	20	0
WT	16	2304	3	7	TSeries-05032019-0942-069	1p_50	1	50	0	20	1
WT	16	2304	3	7	TSeries-05032019-0942-070	1p_25	1	25	0	20	0
WT	16	2304	3	8	TSeries-05032019-0942-071	4p_400	4	400	0	13	3
WT	16	2304	3	8	TSeries-05032019-0942-072	4p_200	4	200	0	13	3
WT	16	2304	3	8	TSeries-05032019-0942-073	4p_100	4	100	0	13	1
WT	16	2304	3	8	TSeries-05032019-0942-074	4p_50	4	50	0	13	0
WT	16	2304	3	8	TSeries-05032019-0942-075	4p_25	4	25	0	13	0
WT	16	2304	3	8	TSeries-05032019-0942-076	1p_400	1	400	0	13	4
WT	16	2304	3	8	TSeries-05032019-0942-077	1p_200	1	200	0	13	1
WT	16	2304	3	8	TSeries-05032019-0942-078	1p_100	1	100	0	13	1
WT	16	2304	3	8	TSeries-05032019-0942-079	1p_50	1	50	0	13	0
WT	16	2304	3	8	TSeries-05032019-0942-080	1p_25	1	25	0	13	0
WT	16	2304	3	9	TSeries-05032019-0942-081	4p_400	4	400	0	11	9
WT	16	2304	3	9	TSeries-05032019-0942-082	4p_200	4	200	0	11	6
WT	16	2304	3	9	TSeries-05032019-0942-083	4p_100	4	100	0	11	0
WT	16	2304	3	9	TSeries-05032019-0942-084	4p_50	4	50	0	11	0
WT	16	2304	3	9	TSeries-05032019-0942-085	4p_25	4	25	0	11	0
WT	16	2304	3	9	TSeries-05032019-0942-086	1p_400	1	400	0	11	2
WT	16	2304	3	9	TSeries-05032019-0942-087	1p_200	1	200	0	11	1
WT	16	2304	3	9	TSeries-05032019-0942-088	1p_100	1	100	0	11	0
WT	16	2304	3	9	TSeries-05032019-0942-089	1p_50	1	50	0	11	0
WT	16	2304	3	9	TSeries-05032019-0942-090	1p_25	1	25	0	11	0
WT	20	2307	1	1	TSeries-05072019-0942-001	4p_400	4	400	0	22	9
WT	20	2307	1	1	TSeries-05072019-0942-002	4p_200	4	200	0	22	4
WT	20	2307	1	1	TSeries-05072019-0942-003	4p_100	4	100	0	22	0
WT	20	2307	1	1	TSeries-05072019-0942-004	4p_50	4	50	0	22	0
WT	20	2307	1	1	TSeries-05072019-0942-005	4p_25	4	25	0	22	0
WT	20	2307	1	1	TSeries-05072019-0942-006	1p_400	1	400	0	22	6
WT	20	2307	1	1	TSeries-05072019-0942-007	1p_200	1	200	0	22	2
WT	20	2307	1	1	TSeries-05072019-0942-008	1p_100	1	100	0	22	1
WT	20	2307	1	1	TSeries-05072019-0942-009	1p_50	1	50	0	22	0
WT	20	2307	1	1	TSeries-05072019-0942-010	1p_25	1	25	0	22	0
WT	20	2307	1	2	TSeries-05072019-0942-011	4p_400	4	400	0	24	5
WT	20	2307	1	2	TSeries-05072019-0942-012	4p_200	4	200	0	24	1
WT	20	2307	1	2	TSeries-05072019-0942-013	4p_100	4	100	0	24	0
WT	20	2307	1	2	TSeries-05072019-0942-014	4p_50	4	50	0	24	1
WT	20	2307	1	2	TSeries-05072019-0942-015	4p_25	4	25	0	24	0
WT	20	2307	1	2	TSeries-05072019-0942-016	1p_400	1	400	0	24	1
WT	20	2307	1	2	TSeries-05072019-0942-017	1p_200	1	200	0	24	0
WT	20	2307	1	2	TSeries-05072019-0942-018	1p_100	1	100	0	24	0
WT	20	2307	1	2	TSeries-05072019-0942-019	1p_50	1	50	0	24	0
WT	20	2307	1	2	TSeries-05072019-0942-020	1p_25	1	25	0	24	0
WT	20	2307	1	3	TSeries-05072019-0942-021	4p_400	4	400	0	8	5
WT	20	2307	1	3	TSeries-05072019-0942-022	4p_200	4	200	0	8	0
WT	20	2307	1	3	TSeries-05072019-0942-023	4p_100	4	100	0	8	0
WT	20	2307	1	3	TSeries-05072019-0942-024	4p_50	4	50	0	8	0
WT	20	2307	1	3	TSeries-05072019-0942-025	4p_25	4	25	0	8	1
WT	20	2307	1	3	TSeries-05072019-0942-026	1p_400	1	400	0	8	1
WT	20	2307	1	3	TSeries-05072019-0942-027	1p_200	1	200	0	8	0
WT	20	2307	1	3	TSeries-05072019-0942-028	1p_100	1	100	0	8	0
WT	20	2307	1	3	TSeries-05072019-0942-029	1p_50	1	50	0	8	0
WT	20	2307	1	3	TSeries-05072019-0942-030	1p_25	1	25	0	8	0
WT	20	2307	2	4	TSeries-05072019-0942-031	4p_400	4	400	0	24	12
WT	20	2307	2	4	TSeries-05072019-0942-032	4p_200	4	200	0	24	1
WT	20	2307	2	4	TSeries-05072019-0942-033	4p_100	4	100	0	24	0
WT	20	2307	2	4	TSeries-05072019-0942-034	4p_50	4	50	0	24	0
WT	20	2307	2	4	TSeries-05072019-0942-035	4p_25	4	25	0	24	0
WT	20	2307	2	4	TSeries-05072019-0942-036	1p_400	1	400	0	24	2
WT	20	2307	2	4	TSeries-05072019-0942-037	1p_200	1	200	0	24	2
WT	20	2307	2	4	TSeries-05072019-0942-038	1p_100	1	100	0	24	0
WT	20	2307	2	4	TSeries-05072019-0942-039	1p_50	1	50	0	24	0
WT	20	2307	2	4	TSeries-05072019-0942-040	1p_25	1	25	0	24	0
WT	20	2307	2	5	TSeries-05072019-0942-041	4p_400	4	400	0	16	16
WT	20	2307	2	5	TSeries-05072019-0942-042	4p_200	4	200	0	16	1
WT	20	2307	2	5	TSeries-05072019-0942-043	4p_100	4	100	0	16	0
WT	20	2307	2	5	TSeries-05072019-0942-044	4p_50	4	50	0	16	0
WT	20	2307	2	5	TSeries-05072019-0942-045	4p_25	4	25	0	16	0
WT	20	2307	2	5	TSeries-05072019-0942-046	1p_400	1	400	0	16	5
WT	20	2307	2	5	TSeries-05072019-0942-047	1p_200	1	200	0	16	0
WT	20	2307	2	5	TSeries-05072019-0942-048	1p_100	1	100	0	16	0
WT	20	2307	2	5	TSeries-05072019-0942-049	1p_50	1	50	0	16	0
WT	20	2307	2	5	TSeries-05072019-0942-050	1p_25	1	25	0	16	0
WT	20	2307	2	6	TSeries-05072019-0942-051	4p_400	4	400	0	11	7
WT	20	2307	2	6	TSeries-05072019-0942-052	4p_200	4	200	0	11	2
WT	20	2307	2	6	TSeries-05072019-0942-053	4p_100	4	100	0	11	0
WT	20	2307	2	6	TSeries-05072019-0942-054	4p_50	4	50	0	11	0
WT	20	2307	2	6	TSeries-05072019-0942-055	4p_25	4	25	0	11	0
WT	20	2307	2	6	TSeries-05072019-0942-056	1p_400	1	400	0	11	2
WT	20	2307	2	6	TSeries-05072019-0942-057	1p_200	1	200	0	11	0
WT	20	2307	2	6	TSeries-05072019-0942-058	1p_100	1	100	0	11	0
WT	20	2307	2	6	TSeries-05072019-0942-059	1p_50	1	50	0	11	1
WT	20	2307	2	6	TSeries-05072019-0942-060	1p_25	1	25	0	11	1
WT	20	2307	3	7	TSeries-05072019-0942-061	4p_400	4	400	0	29	0
WT	20	2307	3	7	TSeries-05072019-0942-062	4p_200	4	200	0	29	0
WT	20	2307	3	7	TSeries-05072019-0942-063	4p_100	4	100	0	29	0
WT	20	2307	3	7	TSeries-05072019-0942-064	4p_50	4	50	0	29	0
WT	20	2307	3	7	TSeries-05072019-0942-065	4p_25	4	25	0	29	1
WT	20	2307	3	7	TSeries-05072019-0942-066	1p_400	1	400	0	29	1
WT	20	2307	3	7	TSeries-05072019-0942-067	1p_200	1	200	0	29	0
WT	20	2307	3	7	TSeries-05072019-0942-068	1p_100	1	100	0	29	0
WT	20	2307	3	7	TSeries-05072019-0942-069	1p_50	1	50	0	29	0
WT	20	2307	3	7	TSeries-05072019-0942-070	1p_25	1	25	0	29	1
WT	20	2307	3	8	TSeries-05072019-0942-071	4p_400	4	400	0	21	2
WT	20	2307	3	8	TSeries-05072019-0942-072	4p_200	4	200	0	21	0
WT	20	2307	3	8	TSeries-05072019-0942-073	4p_100	4	100	0	21	0
WT	20	2307	3	8	TSeries-05072019-0942-074	4p_50	4	50	0	21	0
WT	20	2307	3	8	TSeries-05072019-0942-075	4p_25	4	25	0	21	0
WT	20	2307	3	8	TSeries-05072019-0942-076	1p_400	1	400	0	21	0
WT	20	2307	3	8	TSeries-05072019-0942-077	1p_200	1	200	0	21	1
WT	20	2307	3	8	TSeries-05072019-0942-078	1p_100	1	100	0	21	0
WT	20	2307	3	8	TSeries-05072019-0942-079	1p_50	1	50	0	21	0
WT	20	2307	3	8	TSeries-05072019-0942-080	1p_25	1	25	0	21	3
WT	21	2302	1	1	TSeries-05082019-1008-001	4p_400	4	400	0	43	42
WT	21	2302	1	1	TSeries-05082019-1008-002	4p_200	4	200	0	43	22
WT	21	2302	1	1	TSeries-05082019-1008-003	4p_100	4	100	0	43	5
WT	21	2302	1	1	TSeries-05082019-1008-004	4p_50	4	50	0	43	0
WT	21	2302	1	1	TSeries-05082019-1008-005	4p_25	4	25	0	43	1
WT	21	2302	1	1	TSeries-05082019-1008-006	1p_400	1	400	0	43	42
WT	21	2302	1	1	TSeries-05082019-1008-007	1p_200	1	200	0	43	5
WT	21	2302	1	1	TSeries-05082019-1008-008	1p_100	1	100	0	43	4
WT	21	2302	1	1	TSeries-05082019-1008-009	1p_50	1	50	0	43	0
WT	21	2302	1	1	TSeries-05082019-1008-010	1p_25	1	25	0	43	0
WT	21	2302	1	2	TSeries-05082019-1008-011	4p_400	4	400	0	38	37
WT	21	2302	1	2	TSeries-05082019-1008-012	4p_200	4	200	0	38	35
WT	21	2302	1	2	TSeries-05082019-1008-013	4p_100	4	100	0	38	0
WT	21	2302	1	2	TSeries-05082019-1008-014	4p_50	4	50	0	38	1
WT	21	2302	1	2	TSeries-05082019-1008-015	4p_25	4	25	0	38	0
WT	21	2302	1	2	TSeries-05082019-1008-016	1p_400	1	400	0	38	37
WT	21	2302	1	2	TSeries-05082019-1008-017	1p_200	1	200	0	38	12
WT	21	2302	1	2	TSeries-05082019-1008-018	1p_100	1	100	0	38	0
WT	21	2302	1	2	TSeries-05082019-1008-019	1p_50	1	50	0	38	0
WT	21	2302	1	2	TSeries-05082019-1008-020	1p_25	1	25	0	38	0
WT	21	2302	1	3	TSeries-05082019-1008-021	4p_400	4	400	0	41	41
WT	21	2302	1	3	TSeries-05082019-1008-022	4p_200	4	200	0	41	21
WT	21	2302	1	3	TSeries-05082019-1008-023	4p_100	4	100	0	41	1
WT	21	2302	1	3	TSeries-05082019-1008-024	4p_50	4	50	0	41	0
WT	21	2302	1	3	TSeries-05082019-1008-025	4p_25	4	25	0	41	0
WT	21	2302	1	3	TSeries-05082019-1008-026	1p_400	1	400	0	41	38
WT	21	2302	1	3	TSeries-05082019-1008-027	1p_200	1	200	0	41	3
WT	21	2302	1	3	TSeries-05082019-1008-028	1p_100	1	100	0	41	0
WT	21	2302	1	3	TSeries-05082019-1008-029	1p_50	1	50	0	41	0
WT	21	2302	1	3	TSeries-05082019-1008-030	1p_25	1	25	0	41	1
WT	21	2302	2	4	TSeries-05082019-1008-031	4p_400	4	400	0	8	3
WT	21	2302	2	4	TSeries-05082019-1008-032	4p_200	4	200	0	8	0
WT	21	2302	2	4	TSeries-05082019-1008-033	4p_100	4	100	0	8	0
WT	21	2302	2	4	TSeries-05082019-1008-034	4p_50	4	50	0	8	0
WT	21	2302	2	4	TSeries-05082019-1008-035	4p_25	4	25	0	8	0
WT	21	2302	2	4	TSeries-05082019-1008-036	1p_400	1	400	0	8	0
WT	21	2302	2	4	TSeries-05082019-1008-037	1p_200	1	200	0	8	0
WT	21	2302	2	4	TSeries-05082019-1008-038	1p_100	1	100	0	8	0
WT	21	2302	2	4	TSeries-05082019-1008-039	1p_50	1	50	0	8	0
WT	21	2302	2	4	TSeries-05082019-1008-040	1p_25	1	25	0	8	0
WT	21	2302	2	5	TSeries-05082019-1008-041	4p_400	4	400	0	29	0
WT	21	2302	2	5	TSeries-05082019-1008-042	4p_200	4	200	0	29	0
WT	21	2302	2	5	TSeries-05082019-1008-043	4p_100	4	100	0	29	0
WT	21	2302	2	5	TSeries-05082019-1008-044	4p_50	4	50	0	29	0
WT	21	2302	2	5	TSeries-05082019-1008-045	4p_25	4	25	0	29	0
WT	21	2302	2	5	TSeries-05082019-1008-046	1p_400	1	400	0	29	0
WT	21	2302	2	5	TSeries-05082019-1008-047	1p_200	1	200	0	29	1
WT	21	2302	2	5	TSeries-05082019-1008-048	1p_100	1	100	0	29	0
WT	21	2302	2	5	TSeries-05082019-1008-049	1p_50	1	50	0	29	0
WT	21	2302	2	5	TSeries-05082019-1008-050	1p_25	1	25	0	29	0
WT	17	2578	1	1	TSeries-06272019-1041-001	4p_400	4	400	0	13	13
WT	17	2578	1	1	TSeries-06272019-1041-002	4p_200	4	200	0	13	12
WT	17	2578	1	1	TSeries-06272019-1041-003	4p_100	4	100	0	13	11
WT	17	2578	1	1	TSeries-06272019-1041-004	4p_50	4	50	0	13	5
WT	17	2578	1	1	TSeries-06272019-1041-005	4p_25	4	25	0	13	1
WT	17	2578	1	1	TSeries-06272019-1041-006	1p_400	1	400	0	13	11
WT	17	2578	1	1	TSeries-06272019-1041-007	1p_200	1	200	0	13	7
WT	17	2578	1	1	TSeries-06272019-1041-008	1p_100	1	100	0	13	7
WT	17	2578	1	1	TSeries-06272019-1041-009	1p_50	1	50	0	13	2
WT	17	2578	1	1	TSeries-06272019-1041-010	1p_25	1	25	0	13	0
WT	17	2578	1	2	TSeries-06272019-1041-011	4p_400	4	400	0	15	12
WT	17	2578	1	2	TSeries-06272019-1041-012	4p_200	4	200	0	15	13
WT	17	2578	1	2	TSeries-06272019-1041-013	4p_100	4	100	0	15	0
WT	17	2578	1	2	TSeries-06272019-1041-014	4p_50	4	50	0	15	5
WT	17	2578	1	2	TSeries-06272019-1041-015	4p_25	4	25	0	15	0
WT	17	2578	1	2	TSeries-06272019-1041-016	1p_400	1	400	0	15	6
WT	17	2578	1	2	TSeries-06272019-1041-017	1p_200	1	200	0	15	1
WT	17	2578	1	2	TSeries-06272019-1041-018	1p_100	1	100	0	15	1
WT	17	2578	1	2	TSeries-06272019-1041-019	1p_50	1	50	0	15	0
WT	17	2578	1	2	TSeries-06272019-1041-020	1p_25	1	25	0	15	0
WT	17	2578	2	3	TSeries-06272019-1041-021	4p_400	4	400	0	26	26
WT	17	2578	2	3	TSeries-06272019-1041-022	4p_200	4	200	0	26	21
WT	17	2578	2	3	TSeries-06272019-1041-023	4p_100	4	100	0	26	11
WT	17	2578	2	3	TSeries-06272019-1041-024	4p_50	4	50	0	26	2
WT	17	2578	2	3	TSeries-06272019-1041-025	4p_25	4	25	0	26	0
WT	17	2578	2	3	TSeries-06272019-1041-026	1p_400	1	400	0	26	22
WT	17	2578	2	3	TSeries-06272019-1041-027	1p_200	1	200	0	26	14
WT	17	2578	2	3	TSeries-06272019-1041-028	1p_100	1	100	0	26	7
WT	17	2578	2	3	TSeries-06272019-1041-029	1p_50	1	50	0	26	1
WT	17	2578	2	3	TSeries-06272019-1041-030	1p_25	1	25	0	26	0
WT	17	2578	2	4	TSeries-06272019-1041-031	4p_400	4	400	0	20	20
WT	17	2578	2	4	TSeries-06272019-1041-032	4p_200	4	200	0	20	18
WT	17	2578	2	4	TSeries-06272019-1041-033	4p_100	4	100	0	20	9
WT	17	2578	2	4	TSeries-06272019-1041-034	4p_50	4	50	0	20	1
WT	17	2578	2	4	TSeries-06272019-1041-035	4p_25	4	25	0	20	0
WT	17	2578	2	4	TSeries-06272019-1041-036	1p_400	1	400	0	20	18
WT	17	2578	2	4	TSeries-06272019-1041-037	1p_200	1	200	0	20	10
WT	17	2578	2	4	TSeries-06272019-1041-038	1p_100	1	100	0	20	2
WT	17	2578	2	4	TSeries-06272019-1041-039	1p_50	1	50	0	20	0
WT	17	2578	2	4	TSeries-06272019-1041-040	1p_25	1	25	0	20	0
WT	17	2578	3	5	TSeries-06272019-1041-051	4p_400	4	400	0	10	7
WT	17	2578	3	5	TSeries-06272019-1041-052	4p_200	4	200	0	10	6
WT	17	2578	3	5	TSeries-06272019-1041-053	4p_100	4	100	0	10	4
WT	17	2578	3	5	TSeries-06272019-1041-054	4p_50	4	50	0	10	1
WT	17	2578	3	5	TSeries-06272019-1041-055	4p_25	4	25	0	10	0
WT	17	2578	3	5	TSeries-06272019-1041-056	1p_400	1	400	0	10	8
WT	17	2578	3	5	TSeries-06272019-1041-057	1p_200	1	200	0	10	3
WT	17	2578	3	5	TSeries-06272019-1041-058	1p_100	1	100	0	10	1
WT	17	2578	3	5	TSeries-06272019-1041-059	1p_50	1	50	0	10	1
WT	17	2578	3	5	TSeries-06272019-1041-060	1p_25	1	25	0	10	0
WT	18	2582	1	1	TSeries-06282019-0910-071	4p_400	4	400	0	16	3
WT	18	2582	1	1	TSeries-06282019-0910-072	4p_200	4	200	0	16	0
WT	18	2582	1	1	TSeries-06282019-0910-073	4p_100	4	100	0	16	1
WT	18	2582	1	1	TSeries-06282019-0910-074	4p_50	4	50	0	16	0
WT	18	2582	1	1	TSeries-06282019-0910-075	4p_25	4	25	0	16	1
WT	18	2582	1	1	TSeries-06282019-0910-076	1p_400	1	400	0	16	2
WT	18	2582	1	1	TSeries-06282019-0910-077	1p_200	1	200	0	16	0
WT	18	2582	1	1	TSeries-06282019-0910-078	1p_100	1	100	0	16	0
WT	18	2582	1	1	TSeries-06282019-0910-079	1p_50	1	50	0	16	0
WT	18	2582	1	1	TSeries-06282019-0910-080	1p_25	1	25	0	16	0
WT	18	2582	2	2	TSeries-06282019-0910-081	4p_400	4	400	0	15	11
WT	18	2582	2	2	TSeries-06282019-0910-082	4p_200	4	200	0	15	9
WT	18	2582	2	2	TSeries-06282019-0910-083	4p_100	4	100	0	15	3
WT	18	2582	2	2	TSeries-06282019-0910-084	4p_50	4	50	0	15	0
WT	18	2582	2	2	TSeries-06282019-0910-085	4p_25	4	25	0	15	0
WT	18	2582	2	2	TSeries-06282019-0910-086	1p_400	1	400	0	15	7
WT	18	2582	2	2	TSeries-06282019-0910-087	1p_200	1	200	0	15	5
WT	18	2582	2	2	TSeries-06282019-0910-088	1p_100	1	100	0	15	1
WT	18	2582	2	2	TSeries-06282019-0910-089	1p_50	1	50	0	15	0
WT	18	2582	2	2	TSeries-06282019-0910-090	1p_25	1	25	0	15	0
WT	18	2582	2	3	TSeries-06282019-0910-091	4p_400	4	400	0	7	2
WT	18	2582	2	3	TSeries-06282019-0910-092	4p_200	4	200	0	7	0
WT	18	2582	2	3	TSeries-06282019-0910-093	4p_100	4	100	0	7	0
WT	18	2582	2	3	TSeries-06282019-0910-094	4p_50	4	50	0	7	0
WT	18	2582	2	3	TSeries-06282019-0910-095	4p_25	4	25	0	7	0
WT	18	2582	2	3	TSeries-06282019-0910-096	1p_400	1	400	0	7	1
WT	18	2582	2	3	TSeries-06282019-0910-097	1p_200	1	200	0	7	0
WT	18	2582	2	3	TSeries-06282019-0910-098	1p_100	1	100	0	7	0
WT	18	2582	2	3	TSeries-06282019-0910-099	1p_50	1	50	0	7	0
WT	18	2582	2	3	TSeries-06282019-0910-100	1p_25	1	25	0	7	0
WT	15	4692	1	1	TSeries-09102021-1037-001	4p_400	4	400	1	25	19
WT	15	4692	1	1	TSeries-09102021-1037-002	4p_300	4	300	1	25	14
WT	15	4692	1	1	TSeries-09102021-1037-003	4p_200	4	200	1	25	5
WT	15	4692	1	1	TSeries-09102021-1037-004	4p_100	4	100	1	25	0
WT	15	4692	1	1	TSeries-09102021-1037-005	4p_50	4	50	1	25	0
WT	15	4692	1	1	TSeries-09102021-1037-006	4p_25	4	25	1	25	0
WT	15	4692	1	1	TSeries-09102021-1037-007	1p_400	1	400	1	25	14
WT	15	4692	1	1	TSeries-09102021-1037-008	1p_200	1	200	1	25	1
WT	15	4692	1	1	TSeries-09102021-1037-009	1p_100	1	100	1	25	0
WT	15	4692	1	1	TSeries-09102021-1037-010	1p_50	1	50	1	25	0
WT	15	4692	1	1	TSeries-09102021-1037-011	1p_25	1	25	1	25	1
WT	15	4692	1	1	TSeries-09102021-1037-012	4p_400 + PTX 5 min	4	400	1	25	18
WT	15	4692	1	1	TSeries-09102021-1037-013	4p_400 + PTX 10 min	4	400	1	25	24
WT	15	4692	2	2	TSeries-09102021-1037-014	4p_400	4	400	1	32	29
WT	15	4692	2	2	TSeries-09102021-1037-015	4p_200	4	200	1	32	6
WT	15	4692	2	2	TSeries-09102021-1037-016	4p_100	4	100	1	32	1
WT	15	4692	2	2	TSeries-09102021-1037-017	4p_50	4	50	1	32	0
WT	15	4692	2	2	TSeries-09102021-1037-018	4p_25	4	25	1	32	0
WT	15	4692	2	2	TSeries-09102021-1037-019	1p_400	1	400	1	32	8
WT	15	4692	2	2	TSeries-09102021-1037-020	1p_200	1	200	1	32	3
WT	15	4692	2	2	TSeries-09102021-1037-021	1p_100	1	100	1	32	0
WT	15	4692	2	2	TSeries-09102021-1037-022	1p_50	1	50	1	32	0
WT	15	4692	2	2	TSeries-09102021-1037-023	1p_25	1	25	1	32	1
WT	15	4692	2	2	TSeries-09102021-1037-024	4p_400 + PTX 5 min	4	400	1	32	31
WT	15	4692	2	2	TSeries-09102021-1037-025	4p_400 + PTX 10 min	4	400	1	32	29
WT	15	4692	3	3	TSeries-09102021-1037-026	4p_400	4	400	1	26	22
WT	15	4692	3	3	TSeries-09102021-1037-027	4p_200	4	200	1	26	0
WT	15	4692	3	3	TSeries-09102021-1037-028	4p_100	4	100	1	26	0
WT	15	4692	3	3	TSeries-09102021-1037-029	4p_50	4	50	1	26	0
WT	15	4692	3	3	TSeries-09102021-1037-030	4p_25	4	25	1	26	0
WT	15	4692	3	3	TSeries-09102021-1037-031	1p_400	1	400	1	26	10
WT	15	4692	3	3	TSeries-09102021-1037-032	1p_200	1	200	1	26	0
WT	15	4692	3	3	TSeries-09102021-1037-033	1p_100	1	100	1	26	0
WT	15	4692	3	3	TSeries-09102021-1037-034	1p_50	1	50	1	26	0
WT	15	4692	3	3	TSeries-09102021-1037-035	1p_25	1	25	1	26	0
WT	15	4692	3	3	TSeries-09102021-1037-036	4p_400 + PTX 5 min	4	400	1	26	23
WT	15	4692	3	3	TSeries-09102021-1037-037	4p_400 + PTX 10 min	4	400	1	26	24
WT	20	4689	1	1	TSeries-09152021-0959-001	4p_400	4	400	1	8	6
WT	20	4689	1	1	TSeries-09152021-0959-002	4p_200	4	200	1	8	3
WT	20	4689	1	1	TSeries-09152021-0959-003	4p_100	4	100	1	8	0
WT	20	4689	1	1	TSeries-09152021-0959-004	4p_50	4	50	1	8	0
WT	20	4689	1	1	TSeries-09152021-0959-005	4p_25	4	25	1	8	0
WT	20	4689	1	1	TSeries-09152021-0959-006	1p_400	1	400	1	8	1
WT	20	4689	1	1	TSeries-09152021-0959-007	1p_200	1	200	1	8	0
WT	20	4689	1	1	TSeries-09152021-0959-008	1p_100	1	100	1	8	0
WT	20	4689	1	1	TSeries-09152021-0959-009	1p_50	1	50	1	8	0
WT	20	4689	1	1	TSeries-09152021-0959-010	1p_25	1	25	1	8	0
WT	20	4689	1	1	TSeries-09152021-0959-011	4p_400 + PTX 5 min	4	400	1	8	7
WT	20	4689	1	1	TSeries-09152021-0959-012	4p_400 + PTX 10 min	4	400	1	8	7
WT	20	4689	2	2	TSeries-09152021-0959-013	4p_400	4	400	1	15	11
WT	20	4689	2	2	TSeries-09152021-0959-014	4p_200	4	200	1	15	3
WT	20	4689	2	2	TSeries-09152021-0959-015	4p_100	4	100	1	15	0
WT	20	4689	2	2	TSeries-09152021-0959-016	4p_50	4	50	1	15	1
WT	20	4689	2	2	TSeries-09152021-0959-017	4p_25	4	25	1	15	0
WT	20	4689	2	2	TSeries-09152021-0959-018	1p_400	1	400	1	15	5
WT	20	4689	2	2	TSeries-09152021-0959-019	1p_200	1	200	1	15	0
WT	20	4689	2	2	TSeries-09152021-0959-020	1p_100	1	100	1	15	0
WT	20	4689	2	2	TSeries-09152021-0959-021	1p_50	1	50	1	15	0
WT	20	4689	2	2	TSeries-09152021-0959-022	1p_25	1	25	1	15	0
WT	20	4689	2	2	TSeries-09152021-0959-023	4p_400 + PTX 5 min	4	400	1	15	12
WT	20	4689	2	2	TSeries-09152021-0959-024	4p_400 + PTX 10 min	4	400	1	15	11
WT	20	4691	1	1	TSeries-09152021-0959-025	4p_400	4	400	1	16	13
WT	20	4691	1	1	TSeries-09152021-0959-026	4p_200	4	200	1	16	9
WT	20	4691	1	1	TSeries-09152021-0959-027	4p_100	4	100	1	16	8
WT	20	4691	1	1	TSeries-09152021-0959-028	4p_50	4	50	1	16	3
WT	20	4691	1	1	TSeries-09152021-0959-029	4p_25	4	25	1	16	2
WT	20	4691	1	1	TSeries-09152021-0959-030	1p_400	1	400	1	16	7
WT	20	4691	1	1	TSeries-09152021-0959-031	1p_200	1	200	1	16	7
WT	20	4691	1	1	TSeries-09152021-0959-032	1p_100	1	100	1	16	3
WT	20	4691	1	1	TSeries-09152021-0959-033	1p_50	1	50	1	16	0
WT	20	4691	1	1	TSeries-09152021-0959-034	1p_25	1	25	1	16	0
WT	20	4691	1	1	TSeries-09152021-0959-035	4p_400 + PTX 5 min	4	400	1	16	12
WT	20	4691	1	1	TSeries-09152021-0959-036	4p_400 + PTX 10 min	4	400	1	16	14
WT	20	4691	2	2	TSeries-09152021-0959-037	4p_400	4	400	1	21	20
WT	20	4691	2	2	TSeries-09152021-0959-038	4p_200	4	200	1	21	21
WT	20	4691	2	2	TSeries-09152021-0959-039	4p_100	4	100	1	21	17
WT	20	4691	2	2	TSeries-09152021-0959-040	4p_50	4	50	1	21	4
WT	20	4691	2	2	TSeries-09152021-0959-041	4p_25	4	25	1	21	1
WT	20	4691	2	2	TSeries-09152021-0959-042	1p_400	1	400	1	21	17
WT	20	4691	2	2	TSeries-09152021-0959-043	1p_200	1	200	1	21	16
WT	20	4691	2	2	TSeries-09152021-0959-044	1p_100	1	100	1	21	4
WT	20	4691	2	2	TSeries-09152021-0959-045	1p_50	1	50	1	21	2
WT	20	4691	2	2	TSeries-09152021-0959-046	1p_25	1	25	1	21	0
WT	20	4691	2	2	TSeries-09152021-0959-047	4p_400 + PTX 5 min	4	400	1	21	20
WT	20	4691	2	2	TSeries-09152021-0959-048	4p_400 + PTX 10 min	4	400	1	21	19
WT	20	4691	3	3	TSeries-09152021-0959-049	4p_400	4	400	1	13	12
WT	20	4691	3	3	TSeries-09152021-0959-050	4p_200	4	200	1	13	12
WT	20	4691	3	3	TSeries-09152021-0959-051	4p_100	4	100	1	13	0
WT	20	4691	3	3	TSeries-09152021-0959-052	4p_50	4	50	1	13	0
WT	20	4691	3	3	TSeries-09152021-0959-053	4p_25	4	25	1	13	0
WT	20	4691	3	3	TSeries-09152021-0959-054	1p_400	1	400	1	13	11
WT	20	4691	3	3	TSeries-09152021-0959-055	1p_200	1	200	1	13	3
WT	20	4691	3	3	TSeries-09152021-0959-056	1p_100	1	100	1	13	0
WT	20	4691	3	3	TSeries-09152021-0959-057	1p_50	1	50	1	13	0
WT	20	4691	3	3	TSeries-09152021-0959-058	1p_25	1	25	1	13	0
WT	20	4691	3	3	TSeries-09152021-0959-059	4p_400 + PTX 5 min	4	400	1	13	13
WT	20	4691	3	3	TSeries-09152021-0959-060	4p_400 + PTX 10 min	4	400	1	13	12
WT	20	4690	1	1	TSeries-09152021-0959-061	4p_400	4	400	1	40	35
WT	20	4690	1	1	TSeries-09152021-0959-062	4p_200	4	200	1	40	14
WT	20	4690	1	1	TSeries-09152021-0959-063	4p_100	4	100	1	40	3
WT	20	4690	1	1	TSeries-09152021-0959-064	4p_50	4	50	1	40	1
WT	20	4690	1	1	TSeries-09152021-0959-065	4p_25	4	25	1	40	0
WT	20	4690	1	1	TSeries-09152021-0959-066	1p_400	1	400	1	40	12
WT	20	4690	1	1	TSeries-09152021-0959-067	1p_200	1	200	1	40	8
WT	20	4690	1	1	TSeries-09152021-0959-068	1p_100	1	100	1	40	1
WT	20	4690	1	1	TSeries-09152021-0959-069	1p_50	1	50	1	40	1
WT	20	4690	1	1	TSeries-09152021-0959-070	1p_25	1	25	1	40	0
WT	20	4690	1	1	TSeries-09152021-0959-071	4p_400 + PTX 5 min	4	400	1	40	38
WT	20	4690	1	1	TSeries-09152021-0959-072	4p_400 + PTX 10 min	4	400	1	40	39
WT	20	4690	2	2	TSeries-09152021-0959-073	4p_400	4	400	1	33	33
WT	20	4690	2	2	TSeries-09152021-0959-074	4p_200	4	200	1	33	9
WT	20	4690	2	2	TSeries-09152021-0959-075	4p_100	4	100	1	33	1
WT	20	4690	2	2	TSeries-09152021-0959-076	4p_50	4	50	1	33	2
WT	20	4690	2	2	TSeries-09152021-0959-077	4p_25	4	25	1	33	0
WT	20	4690	2	2	TSeries-09152021-0959-078	1p_400	1	400	1	33	16
WT	20	4690	2	2	TSeries-09152021-0959-079	1p_200	1	200	1	33	0
WT	20	4690	2	2	TSeries-09152021-0959-080	1p_100	1	100	1	33	1
WT	20	4690	2	2	TSeries-09152021-0959-081	1p_50	1	50	1	33	0
WT	20	4690	2	2	TSeries-09152021-0959-082	1p_25	1	25	1	33	0
WT	20	4690	2	2	TSeries-09152021-0959-083	4p_400 + PTX 5 min	4	400	1	33	32
WT	20	4690	2	2	TSeries-09152021-0959-084	4p_400 + PTX 10 min	4	400	1	33	33
WT	20	4690	3	3	TSeries-09152021-0959-085	4p_400	4	400	1	22	22
WT	20	4690	3	3	TSeries-09152021-0959-086	4p_200	4	200	1	22	22
WT	20	4690	3	3	TSeries-09152021-0959-087	4p_100	4	100	1	22	9
WT	20	4690	3	3	TSeries-09152021-0959-088	4p_50	4	50	1	22	4
WT	20	4690	3	3	TSeries-09152021-0959-089	4p_25	4	25	1	22	1
WT	20	4690	3	3	TSeries-09152021-0959-090	1p_400	1	400	1	22	16
WT	20	4690	3	3	TSeries-09152021-0959-091	1p_200	1	200	1	22	2
WT	20	4690	3	3	TSeries-09152021-0959-092	1p_100	1	100	1	22	2
WT	20	4690	3	3	TSeries-09152021-0959-093	1p_50	1	50	1	22	0
WT	20	4690	3	3	TSeries-09152021-0959-094	1p_25	1	25	1	22	0
WT	20	4690	3	3	TSeries-09152021-0959-095	4p_400 + PTX 5 min	4	400	1	22	21
WT	20	4690	3	3	TSeries-09152021-0959-096	4p_400 + PTX 10 min	4	400	1	22	21
WT	21	4693	1	1	TSeries-09162021-1059-049	4p_400	4	400	1	15	4
WT	21	4693	1	1	TSeries-09162021-1059-050	4p_200	4	200	1	15	2
WT	21	4693	1	1	TSeries-09162021-1059-051	4p_100	4	100	1	15	0
WT	21	4693	1	1	TSeries-09162021-1059-052	4p_50	4	50	1	15	1
WT	21	4693	1	1	TSeries-09162021-1059-053	4p_25	4	25	1	15	0
WT	21	4693	1	1	TSeries-09162021-1059-054	1p_400	1	400	1	15	2
WT	21	4693	1	1	TSeries-09162021-1059-055	1p_200	1	200	1	15	0
WT	21	4693	1	1	TSeries-09162021-1059-056	1p_100	1	100	1	15	0
WT	21	4693	1	1	TSeries-09162021-1059-057	1p_50	1	50	1	15	0
WT	21	4693	1	1	TSeries-09162021-1059-058	1p_25	1	25	1	15	0
WT	21	4693	1	1	TSeries-09162021-1059-059	4p_400 + PTX 5 min	4	400	1	15	4
WT	21	4693	1	1	TSeries-09162021-1059-060	4p_400 + PTX 10 min	4	400	1	15	8
WT	21	4693	2	2	TSeries-09162021-1059-061	4p_400	4	400	1	27	26
WT	21	4693	2	2	TSeries-09162021-1059-062	4p_200	4	200	1	27	17
WT	21	4693	2	2	TSeries-09162021-1059-063	4p_100	4	100	1	27	6
WT	21	4693	2	2	TSeries-09162021-1059-064	4p_50	4	50	1	27	3
WT	21	4693	2	2	TSeries-09162021-1059-065	4p_25	4	25	1	27	2
WT	21	4693	2	2	TSeries-09162021-1059-066	1p_400	1	400	1	27	9
WT	21	4693	2	2	TSeries-09162021-1059-067	1p_200	1	200	1	27	3
WT	21	4693	2	2	TSeries-09162021-1059-068	1p_100	1	100	1	27	1
WT	21	4693	2	2	TSeries-09162021-1059-069	1p_50	1	50	1	27	0
WT	21	4693	2	2	TSeries-09162021-1059-070	1p_25	1	25	1	27	1
WT	21	4693	2	2	TSeries-09162021-1059-071	4p_400 + PTX 5 min	4	400	1	27	19
WT	21	4693	2	2	TSeries-09162021-1059-072	4p_400 + PTX 10 min	4	400	1	27	23
WT	21	4693	3	3	TSeries-09162021-1059-073	4p_400	4	400	1	29	21
WT	21	4693	3	3	TSeries-09162021-1059-074	4p_200	4	200	1	29	11
WT	21	4693	3	3	TSeries-09162021-1059-075	4p_100	4	100	1	29	7
WT	21	4693	3	3	TSeries-09162021-1059-076	4p_50	4	50	1	29	0
WT	21	4693	3	3	TSeries-09162021-1059-077	4p_25	4	25	1	29	1
WT	21	4693	3	3	TSeries-09162021-1059-078	1p_400	1	400	1	29	22
WT	21	4693	3	3	TSeries-09162021-1059-079	1p_200	1	200	1	29	5
WT	21	4693	3	3	TSeries-09162021-1059-080	1p_100	1	100	1	29	1
WT	21	4693	3	3	TSeries-09162021-1059-081	1p_50	1	50	1	29	0
WT	21	4693	3	3	TSeries-09162021-1059-082	1p_25	1	25	1	29	0
WT	21	4693	3	3	TSeries-09162021-1059-083	4p_400 + PTX 5 min	4	400	1	29	26
WT	21	4693	3	3	TSeries-09162021-1059-084	4p_400 + PTX 10 min	4	400	1	29	27
WT	21	4693	4	4	TSeries-09162021-1059-085	4p_400	4	400	1	32	24
WT	21	4693	4	4	TSeries-09162021-1059-086	4p_200	4	200	1	32	21
WT	21	4693	4	4	TSeries-09162021-1059-087	4p_100	4	100	1	32	24
WT	21	4693	4	4	TSeries-09162021-1059-088	4p_50	4	50	1	32	6
WT	21	4693	4	4	TSeries-09162021-1059-089	4p_25	4	25	1	32	1
WT	21	4693	4	4	TSeries-09162021-1059-090	1p_400	1	400	1	32	21
WT	21	4693	4	4	TSeries-09162021-1059-091	1p_200	1	200	1	32	11
WT	21	4693	4	4	TSeries-09162021-1059-092	1p_100	1	100	1	32	11
WT	21	4693	4	4	TSeries-09162021-1059-093	1p_50	1	50	1	32	1
WT	21	4693	4	4	TSeries-09162021-1059-094	1p_25	1	25	1	32	0
WT	21	4693	4	4	TSeries-09162021-1059-095	4p_400 + PTX 5 min	4	400	1	32	24
WT	21	4693	4	4	TSeries-09162021-1059-096	4p_400 + PTX 10 min	4	400	1	32	23
WT	21	4693	5	5	TSeries-09162021-1059-097	4p_400	4	400	1	18	17
WT	21	4693	5	5	TSeries-09162021-1059-098	4p_200	4	200	1	18	1
WT	21	4693	5	5	TSeries-09162021-1059-099	4p_100	4	100	1	18	0
WT	21	4693	5	5	TSeries-09162021-1059-100	4p_50	4	50	1	18	0
WT	21	4693	5	5	TSeries-09162021-1059-101	4p_25	4	25	1	18	0
WT	21	4693	5	5	TSeries-09162021-1059-102	1p_400	1	400	1	18	5
WT	21	4693	5	5	TSeries-09162021-1059-103	1p_200	1	200	1	18	0
WT	21	4693	5	5	TSeries-09162021-1059-104	1p_100	1	100	1	18	0
WT	21	4693	5	5	TSeries-09162021-1059-105	1p_50	1	50	1	18	1
WT	21	4693	5	5	TSeries-09162021-1059-106	1p_25	1	25	1	18	0
WT	21	4693	5	5	TSeries-09162021-1059-107	4p_400 + PTX 5 min	4	400	1	18	16
WT	21	4693	5	5	TSeries-09162021-1059-108	4p_400 + PTX 10 min	4	400	1	18	18

## Sheet: young adult - by field
Genotype	age	mouse	slice	field	File name	condition	pulses	power	PTX	Total Cells	Activated Cells
Scn1a	48	2295	2	4	TSeries-05312019-1217-031	4p_500	4	500	0	50	49
Scn1a	48	2295	2	4	TSeries-05312019-1217-032	4p_400	4	400	0	50	45
Scn1a	48	2295	2	4	TSeries-05312019-1217-033	4p_300	4	300	0	50	34
Scn1a	48	2295	2	4	TSeries-05312019-1217-034	4p_200	4	200	0	50	0
Scn1a	48	2295	2	4	TSeries-05312019-1217-035	4p_100	4	100	0	50	0
Scn1a	48	2295	2	4	TSeries-05312019-1217-036	1p_500	1	500	0	50	39
Scn1a	48	2295	2	4	TSeries-05312019-1217-037	1p_400	1	400	0	50	31
Scn1a	48	2295	2	4	TSeries-05312019-1217-038	1p_300	1	300	0	50	6
Scn1a	48	2295	2	4	TSeries-05312019-1217-039	1p_200	1	200	0	50	2
Scn1a	48	2295	2	4	TSeries-05312019-1217-040	1p_100	1	100	0	50	0
Scn1a	48	2295	3	6	TSeries-05312019-1217-051	4p_500	4	500	0	54	9
Scn1a	48	2295	3	6	TSeries-05312019-1217-052	4p_400	4	400	0	54	8
Scn1a	48	2295	3	6	TSeries-05312019-1217-053	4p_300	4	300	0	54	2
Scn1a	48	2295	3	6	TSeries-05312019-1217-054	4p_200	4	200	0	54	0
Scn1a	48	2295	3	6	TSeries-05312019-1217-055	4p_100	4	100	0	54	1
Scn1a	48	2295	3	6	TSeries-05312019-1217-056	1p_500	1	500	0	54	2
Scn1a	48	2295	3	6	TSeries-05312019-1217-057	1p_400	1	400	0	54	5
Scn1a	48	2295	3	6	TSeries-05312019-1217-058	1p_300	1	300	0	54	3
Scn1a	48	2295	3	6	TSeries-05312019-1217-059	1p_200	1	200	0	54	0
Scn1a	48	2295	3	6	TSeries-05312019-1217-060	1p_100	1	100	0	54	0
Scn1a	48	2295	4	9	TSeries-05312019-1217-091	4p_500	4	500	0	59	49
Scn1a	48	2295	4	9	TSeries-05312019-1217-092	4p_400	4	400	0	59	42
Scn1a	48	2295	4	9	TSeries-05312019-1217-093	4p_300	4	300	0	59	24
Scn1a	48	2295	4	9	TSeries-05312019-1217-094	4p_200	4	200	0	59	4
Scn1a	48	2295	4	9	TSeries-05312019-1217-095	4p_100	4	100	0	59	2
Scn1a	48	2295	4	9	TSeries-05312019-1217-096	1p_500	1	500	0	59	31
Scn1a	48	2295	4	9	TSeries-05312019-1217-097	1p_400	1	400	0	59	32
Scn1a	48	2295	4	9	TSeries-05312019-1217-098	1p_300	1	300	0	59	12
Scn1a	48	2295	4	9	TSeries-05312019-1217-099	1p_200	1	200	0	59	4
Scn1a	48	2295	4	9	TSeries-05312019-1217-100	1p_100	1	100	0	59	1
Scn1a	91	2513	1	1	TSeries-08272019-1215-001	4p_500	4	500	1	73	61
Scn1a	91	2513	1	1	TSeries-08272019-1215-002	4p_400	4	400	1	73	69
Scn1a	91	2513	1	1	TSeries-08272019-1215-003	4p_300	4	300	1	73	61
Scn1a	91	2513	1	1	TSeries-08272019-1215-004	4p_200	4	200	1	73	27
Scn1a	91	2513	1	1	TSeries-08272019-1215-005	4p_100	4	100	1	73	3
Scn1a	91	2513	1	1	TSeries-08272019-1215-006	1p_500	1	500	1	73	41
Scn1a	91	2513	1	1	TSeries-08272019-1215-007	1p_400	1	400	1	73	34
Scn1a	91	2513	1	1	TSeries-08272019-1215-008	1p_300	1	300	1	73	25
Scn1a	91	2513	1	1	TSeries-08272019-1215-009	1p_200	1	200	1	73	9
Scn1a	91	2513	1	1	TSeries-08272019-1215-010	1p_100	1	100	1	73	1
Scn1a	91	2513	1	1	TSeries-08272019-1215-021	4p_500_PTX_pre	4	500	1	73	72
Scn1a	91	2513	1	1	TSeries-08272019-1215-022	4p_500_PTX_5min	4	500	1	73	73
Scn1a	91	2513	1	1	TSeries-08272019-1215-024	4p_500_PTX_10min	4	500	1	73	70
Scn1a	91	2513	2	2	TSeries-08272019-1215-026	4p_500	4	500	1	39	36
Scn1a	91	2513	2	2	TSeries-08272019-1215-027	4p_400	4	400	1	39	25
Scn1a	91	2513	2	2	TSeries-08272019-1215-028	4p_300	4	300	1	39	7
Scn1a	91	2513	2	2	TSeries-08272019-1215-029	4p_200	4	200	1	39	1
Scn1a	91	2513	2	2	TSeries-08272019-1215-030	4p_100	4	100	1	39	0
Scn1a	91	2513	2	2	TSeries-08272019-1215-031	1p_500	1	500	1	39	22
Scn1a	91	2513	2	2	TSeries-08272019-1215-032	1p_400	1	400	1	39	9
Scn1a	91	2513	2	2	TSeries-08272019-1215-033	1p_300	1	300	1	39	4
Scn1a	91	2513	2	2	TSeries-08272019-1215-034	1p_200	1	200	1	39	2
Scn1a	91	2513	2	2	TSeries-08272019-1215-035	1p_100	1	100	1	39	0
Scn1a	91	2513	2	2	TSeries-08272019-1215-046	4p_500_PTX_pre	4	500	1	39	38
Scn1a	91	2513	2	2	TSeries-08272019-1215-047	4p_500_PTX_5min	4	500	1	39	35
Scn1a	91	2513	2	2	TSeries-08272019-1215-049	4p_500_PTX_10min	4	500	1	39	39
Scn1a	68	2783	1	1	TSeries-10082019-1311-003	4p_500	4	500	1	61	3
Scn1a	68	2783	1	1	TSeries-10082019-1311-004	4p_400	4	400	1	61	2
Scn1a	68	2783	1	1	TSeries-10082019-1311-005	4p_300	4	300	1	61	1
Scn1a	68	2783	1	1	TSeries-10082019-1311-006	4p_200	4	200	1	61	0
Scn1a	68	2783	1	1	TSeries-10082019-1311-007	4p_100	4	100	1	61	0
Scn1a	68	2783	1	1	TSeries-10082019-1311-008	1p_500	1	500	1	61	1
Scn1a	68	2783	1	1	TSeries-10082019-1311-009	1p_400	1	400	1	61	0
Scn1a	68	2783	1	1	TSeries-10082019-1311-010	1p_300	1	300	1	61	0
Scn1a	68	2783	1	1	TSeries-10082019-1311-011	1p_200	1	200	1	61	0
Scn1a	68	2783	1	1	TSeries-10082019-1311-013	1p_100	1	100	1	61	0
Scn1a	68	2783	1	1	TSeries-10082019-1311-014	4p_500_PTX_pre	4	500	1	61	11
Scn1a	68	2783	1	1	TSeries-10082019-1311-015	4p_500_PTX_5min	4	500	1	61	60
Scn1a	68	2783	1	1	TSeries-10082019-1311-016	4p_500_PTX_10min	4	500	1	61	61
Scn1a	68	2783	1	1	TSeries-10082019-1311-017	4p_500_PTX_15min	4	500	1	61	61
Scn1a	68	2783	2	5	TSeries-10082019-1311-032	4p_500	4	500	1	101	59
Scn1a	68	2783	2	5	TSeries-10082019-1311-033	4p_400	4	400	1	101	41
Scn1a	68	2783	2	5	TSeries-10082019-1311-034	4p_300	4	300	1	101	30
Scn1a	68	2783	2	5	TSeries-10082019-1311-035	4p_200	4	200	1	101	8
Scn1a	68	2783	2	5	TSeries-10082019-1311-036	4p_100	4	100	1	101	6
Scn1a	68	2783	2	5	TSeries-10082019-1311-037	1p_500	1	500	1	101	7
Scn1a	68	2783	2	5	TSeries-10082019-1311-038	1p_400	1	400	1	101	5
Scn1a	68	2783	2	5	TSeries-10082019-1311-039	1p_300	1	300	1	101	0
Scn1a	68	2783	2	5	TSeries-10082019-1311-040	1p_200	1	200	1	101	0
Scn1a	68	2783	2	5	TSeries-10082019-1311-041	1p_100	1	100	1	101	1
Scn1a	68	2783	2	5	TSeries-10082019-1311-042	4p_500_PTX_pre	4	500	1	101	58
Scn1a	68	2783	2	5	TSeries-10082019-1311-043	4p_500_PTX_5min	4	500	1	101	87
Scn1a	68	2783	2	5	TSeries-10082019-1311-044	4p_500_PTX_10min	4	500	1	101	98
Scn1a	68	2783	3	6	TSeries-10082019-1311-045	4p_500	4	500	1	48	5
Scn1a	68	2783	3	6	TSeries-10082019-1311-046	4p_400	4	400	1	48	5
Scn1a	68	2783	3	6	TSeries-10082019-1311-047	4p_300	4	300	1	48	4
Scn1a	68	2783	3	6	TSeries-10082019-1311-048	4p_200	4	200	1	48	2
Scn1a	68	2783	3	6	TSeries-10082019-1311-049	4p_100	4	100	1	48	2
Scn1a	68	2783	3	6	TSeries-10082019-1311-050	1p_500	1	500	1	48	0
Scn1a	68	2783	3	6	TSeries-10082019-1311-051	1p_400	1	400	1	48	0
Scn1a	68	2783	3	6	TSeries-10082019-1311-052	1p_300	1	300	1	48	0
Scn1a	68	2783	3	6	TSeries-10082019-1311-053	1p_200	1	200	1	48	1
Scn1a	68	2783	3	6	TSeries-10082019-1311-054	1p_100	1	100	1	48	1
Scn1a	68	2783	3	6	TSeries-10082019-1311-055	4p_500_PTX_pre	4	500	1	48	6
Scn1a	68	2783	3	6	TSeries-10082019-1311-056	4p_500_PTX_5min	4	500	1	48	11
Scn1a	68	2783	3	6	TSeries-10082019-1311-057	4p_500_PTX_10min	4	500	1	48	46
Scn1a	68	2783	4	7	TSeries-10082019-1311-058	4p_500	4	500	1	60	52
Scn1a	68	2783	4	7	TSeries-10082019-1311-059	4p_400	4	400	1	60	43
Scn1a	68	2783	4	7	TSeries-10082019-1311-060	4p_300	4	300	1	60	27
Scn1a	68	2783	4	7	TSeries-10082019-1311-061	4p_200	4	200	1	60	9
Scn1a	68	2783	4	7	TSeries-10082019-1311-062	4p_100	4	100	1	60	0
Scn1a	68	2783	4	7	TSeries-10082019-1311-063	1p_500	1	500	1	60	7
Scn1a	68	2783	4	7	TSeries-10082019-1311-064	1p_400	1	400	1	60	3
Scn1a	68	2783	4	7	TSeries-10082019-1311-065	1p_300	1	300	1	60	2
Scn1a	68	2783	4	7	TSeries-10082019-1311-066	1p_200	1	200	1	60	2
Scn1a	68	2783	4	7	TSeries-10082019-1311-067	1p_100	1	100	1	60	2
Scn1a	68	2783	4	7	TSeries-10082019-1311-068	4p_500_PTX_pre	4	500	1	60	49
Scn1a	68	2783	4	7	TSeries-10082019-1311-069	4p_500_PTX_5min	4	500	1	60	52
Scn1a	68	2783	4	7	TSeries-10082019-1311-070	4p_500_PTX_10min	4	500	1	60	58
Scn1a	76	2814	1	1	TSeries-10222019-1101-001	4p_500	4	500	1	81	81
Scn1a	76	2814	1	1	TSeries-10222019-1101-002	4p_400	4	400	1	81	79
Scn1a	76	2814	1	1	TSeries-10222019-1101-003	4p_300	4	300	1	81	80
Scn1a	76	2814	1	1	TSeries-10222019-1101-004	4p_200	4	200	1	81	72
Scn1a	76	2814	1	1	TSeries-10222019-1101-005	4p_100	4	100	1	81	50
Scn1a	76	2814	1	1	TSeries-10222019-1101-006	1p_500	1	500	1	81	63
Scn1a	76	2814	1	1	TSeries-10222019-1101-007	1p_400	1	400	1	81	68
Scn1a	76	2814	1	1	TSeries-10222019-1101-008	1p_300	1	300	1	81	69
Scn1a	76	2814	1	1	TSeries-10222019-1101-009	1p_200	1	200	1	81	60
Scn1a	76	2814	1	1	TSeries-10222019-1101-010	1p_100	1	100	1	81	42
Scn1a	76	2814	1	1	TSeries-10222019-1101-021	4p_500_PTX_pre	4	500	1	81	80
Scn1a	76	2814	1	1	TSeries-10222019-1101-023	4p_500_PTX_5min	4	500	1	81	81
Scn1a	76	2814	1	1	TSeries-10222019-1101-025	4p_500_PTX_10min	4	500	1	81	59
Scn1a	68	2860	1	1	TSeries-10242019-2321-004	4p_500	4	500	1	63	48
Scn1a	68	2860	1	1	TSeries-10242019-2321-005	4p_400	4	400	1	63	16
Scn1a	68	2860	1	1	TSeries-10242019-2321-006	4p_300	4	300	1	63	1
Scn1a	68	2860	1	1	TSeries-10242019-2321-007	4p_200	4	200	1	63	0
Scn1a	68	2860	1	1	TSeries-10242019-2321-008	4p_100	4	100	1	63	1
Scn1a	68	2860	1	1	TSeries-10242019-2321-009	1p_500	1	500	1	63	7
Scn1a	68	2860	1	1	TSeries-10242019-2321-010	1p_400	1	400	1	63	4
Scn1a	68	2860	1	1	TSeries-10242019-2321-011	1p_300	1	300	1	63	0
Scn1a	68	2860	1	1	TSeries-10242019-2321-012	1p_200	1	200	1	63	1
Scn1a	68	2860	1	1	TSeries-10242019-2321-013	1p_100	1	100	1	63	0
Scn1a	68	2860	1	1	TSeries-10242019-2321-014	4p_500_PTX_pre	4	500	1	63	60
Scn1a	68	2860	1	1	TSeries-10242019-2321-015	4p_500_PTX_5min	4	500	1	63	63
Scn1a	68	2860	1	1	TSeries-10242019-2321-016	4p_500_PTX_10min	4	500	1	63	63
Scn1a	68	2860	2	2	TSeries-10242019-2321-026	4p_500	4	500	1	97	53
Scn1a	68	2860	2	2	TSeries-10242019-2321-027	4p_400	4	400	1	97	23
Scn1a	68	2860	2	2	TSeries-10242019-2321-028	4p_300	4	300	1	97	15
Scn1a	68	2860	2	2	TSeries-10242019-2321-029	4p_200	4	200	1	97	7
Scn1a	68	2860	2	2	TSeries-10242019-2321-030	4p_100	4	100	1	97	9
Scn1a	68	2860	2	2	TSeries-10242019-2321-031	1p_500	1	500	1	97	8
Scn1a	68	2860	2	2	TSeries-10242019-2321-032	1p_400	1	400	1	97	2
Scn1a	68	2860	2	2	TSeries-10242019-2321-033	1p_300	1	300	1	97	2
Scn1a	68	2860	2	2	TSeries-10242019-2321-034	1p_200	1	200	1	97	3
Scn1a	68	2860	2	2	TSeries-10242019-2321-035	1p_100	1	100	1	97	1
Scn1a	68	2860	2	2	TSeries-10242019-2321-036	4p_500_PTX_pre	4	500	1	97	28
Scn1a	68	2860	2	2	TSeries-10242019-2321-037	4p_500_PTX_5min	4	500	1	97	65
Scn1a	68	2860	2	2	TSeries-10242019-2321-038	4p_500_PTX_10min	4	500	1	97	93
Scn1a	69	2871	1	1	TSeries-10292019-1106-001	4p_500	4	500	1	61	58
Scn1a	69	2871	1	1	TSeries-10292019-1106-002	4p_400	4	400	1	61	50
Scn1a	69	2871	1	1	TSeries-10292019-1106-003	4p_300	4	300	1	61	29
Scn1a	69	2871	1	1	TSeries-10292019-1106-004	4p_200	4	200	1	61	14
Scn1a	69	2871	1	1	TSeries-10292019-1106-005	4p_100	4	100	1	61	0
Scn1a	69	2871	1	1	TSeries-10292019-1106-006	1p_500	1	500	1	61	56
Scn1a	69	2871	1	1	TSeries-10292019-1106-007	1p_400	1	400	1	61	42
Scn1a	69	2871	1	1	TSeries-10292019-1106-008	1p_300	1	300	1	61	18
Scn1a	69	2871	1	1	TSeries-10292019-1106-009	1p_200	1	200	1	61	5
Scn1a	69	2871	1	1	TSeries-10292019-1106-010	1p_100	1	100	1	61	0
Scn1a	69	2871	1	1	TSeries-10292019-1106-023	4p_500_PTX_pre	4	500	1	61	60
Scn1a	69	2871	1	1	TSeries-10292019-1106-024	4p_500_PTX_5min	4	500	1	61	61
Scn1a	69	2871	1	1	TSeries-10292019-1106-025	4p_500_PTX_10min	4	500	1	61	60
Scn1a	69	2871	2	2	TSeries-10292019-1106-041	4p_500	4	500	1	101	79
Scn1a	69	2871	2	2	TSeries-10292019-1106-042	4p_400	4	400	1	101	66
Scn1a	69	2871	2	2	TSeries-10292019-1106-043	4p_300	4	300	1	101	43
Scn1a	69	2871	2	2	TSeries-10292019-1106-044	4p_200	4	200	1	101	12
Scn1a	69	2871	2	2	TSeries-10292019-1106-045	4p_100	4	100	1	101	3
Scn1a	69	2871	2	2	TSeries-10292019-1106-046	1p_500	1	500	1	101	8
Scn1a	69	2871	2	2	TSeries-10292019-1106-047	1p_400	1	400	1	101	8
Scn1a	69	2871	2	2	TSeries-10292019-1106-048	1p_300	1	300	1	101	3
Scn1a	69	2871	2	2	TSeries-10292019-1106-049	1p_200	1	200	1	101	2
Scn1a	69	2871	2	2	TSeries-10292019-1106-050	1p_100	1	100	1	101	0
Scn1a	69	2871	2	2	TSeries-10292019-1106-051	4p_500_PTX_pre	4	500	1	101	85
Scn1a	69	2871	2	2	TSeries-10292019-1106-052	4p_500_PTX_5min	4	500	1	101	99
Scn1a	69	2871	2	2	TSeries-10292019-1106-053	4p_500_PTX_10min	4	500	1	101	99
Scn1a	61	2910	1	2	TSeries-10292019-1106-023	4p_500	4	500	1	109	105
Scn1a	61	2910	1	2	TSeries-10292019-1106-024	4p_400	4	400	1	109	95
Scn1a	61	2910	1	2	TSeries-10292019-1106-025	4p_300	4	300	1	109	78
Scn1a	61	2910	1	2	TSeries-10292019-1106-026	4p_200	4	200	1	109	47
Scn1a	61	2910	1	2	TSeries-10292019-1106-027	4p_100	4	100	1	109	9
Scn1a	61	2910	1	2	TSeries-10292019-1106-028	1p_500	1	500	1	109	76
Scn1a	61	2910	1	2	TSeries-10292019-1106-029	1p_400	1	400	1	109	65
Scn1a	61	2910	1	2	TSeries-10292019-1106-030	1p_300	1	300	1	109	23
Scn1a	61	2910	1	2	TSeries-10292019-1106-031	1p_200	1	200	1	109	11
Scn1a	61	2910	1	2	TSeries-10292019-1106-032	1p_100	1	100	1	109	0
Scn1a	61	2910	1	2	TSeries-10292019-1106-033	4p_500_PTX_pre	4	500	1	109	108
Scn1a	61	2910	1	2	TSeries-10292019-1106-034	4p_500_PTX_5min	4	500	1	109	109
Scn1a	61	2910	1	2	TSeries-10292019-1106-035	4p_500_PTX_10min	4	500	1	109	101
Scn1a	61	2910	2	4	TSeries-10292019-1106-042	4p_500	4	500	1	62	9
Scn1a	61	2910	2	4	TSeries-10292019-1106-043	4p_400	4	400	1	62	2
Scn1a	61	2910	2	4	TSeries-10292019-1106-044	4p_300	4	300	1	62	4
Scn1a	61	2910	2	4	TSeries-10292019-1106-045	4p_200	4	200	1	62	1
Scn1a	61	2910	2	4	TSeries-10292019-1106-046	4p_100	4	100	1	62	1
Scn1a	61	2910	2	4	TSeries-10292019-1106-047	1p_500	1	500	1	62	1
Scn1a	61	2910	2	4	TSeries-10292019-1106-048	1p_400	1	400	1	62	1
Scn1a	61	2910	2	4	TSeries-10292019-1106-049	1p_300	1	300	1	62	2
Scn1a	61	2910	2	4	TSeries-10292019-1106-050	1p_200	1	200	1	62	2
Scn1a	61	2910	2	4	TSeries-10292019-1106-051	1p_100	1	100	1	62	1
Scn1a	61	2910	2	4	TSeries-10292019-1106-052	4p_500_PTX_pre	4	500	1	62	4
Scn1a	61	2910	2	4	TSeries-10292019-1106-053	4p_500_PTX_5min	4	500	1	62	19
Scn1a	61	2910	2	4	TSeries-10292019-1106-054	4p_500_PTX_10min	4	500	1	62	59
Scn1a	62	2909	1	3	TSeries-10312019-1006-027	4p_500	4	500	1	117	92
Scn1a	62	2909	1	3	TSeries-10312019-1006-028	4p_400	4	400	1	117	61
Scn1a	62	2909	1	3	TSeries-10312019-1006-029	4p_300	4	300	1	117	36
Scn1a	62	2909	1	3	TSeries-10312019-1006-030	4p_200	4	200	1	117	14
Scn1a	62	2909	1	3	TSeries-10312019-1006-031	4p_100	4	100	1	117	2
Scn1a	62	2909	1	3	TSeries-10312019-1006-032	1p_500	1	500	1	117	20
Scn1a	62	2909	1	3	TSeries-10312019-1006-033	1p_400	1	400	1	117	8
Scn1a	62	2909	1	3	TSeries-10312019-1006-034	1p_300	1	300	1	117	3
Scn1a	62	2909	1	3	TSeries-10312019-1006-035	1p_200	1	200	1	117	0
Scn1a	62	2909	1	3	TSeries-10312019-1006-036	1p_100	1	100	1	117	0
Scn1a	62	2909	1	3	TSeries-10312019-1006-048	4p_500_PTX_pre	4	500	1	117	57
Scn1a	62	2909	1	3	TSeries-10312019-1006-049	4p_500_PTX_5min	4	500	1	117	104
Scn1a	62	2909	1	3	TSeries-10312019-1006-050	4p_500_PTX_10min	4	500	1	117	116
WT	71	2517	1	1	TSeries-08072019-1155-001	4p_500	4	500	1	104	19
WT	71	2517	1	1	TSeries-08072019-1155-002	4p_400	4	400	1	104	12
WT	71	2517	1	1	TSeries-08072019-1155-003	4p_300	4	300	1	104	2
WT	71	2517	1	1	TSeries-08072019-1155-004	4p_200	4	200	1	104	1
WT	71	2517	1	1	TSeries-08072019-1155-005	4p_100	4	100	1	104	0
WT	71	2517	1	1	TSeries-08072019-1155-006	1p_500	1	500	1	104	8
WT	71	2517	1	1	TSeries-08072019-1155-007	1p_400	1	400	1	104	2
WT	71	2517	1	1	TSeries-08072019-1155-008	1p_300	1	300	1	104	1
WT	71	2517	1	1	TSeries-08072019-1155-009	1p_200	1	200	1	104	0
WT	71	2517	1	1	TSeries-08072019-1155-010	1p_100	1	100	1	104	0
WT	71	2517	1	1	TSeries-07052019-0635-011	4p_500_PTX_pre	4	500	1	104	26
WT	71	2517	1	1	TSeries-07052019-0635-012	4p_500_PTX_5min	4	500	1	104	63
WT	71	2517	1	1	TSeries-07052019-0635-013	4p_500_PTX_10min	4	500	1	104	104
WT	71	2517	1	1	TSeries-07052019-0635-014	4p_500_PTX_15min	4	500	1	104	104
WT	71	2517	1	1	TSeries-07052019-0635-015	1p_500_PTX_15min	1	500	1	104	102
WT	71	2517	2	2	TSeries-07052019-0635-021	4p_500	4	500	1	51	12
WT	71	2517	2	2	TSeries-07052019-0635-022	4p_400	4	400	1	51	6
WT	71	2517	2	2	TSeries-07052019-0635-023	4p_300	4	300	1	51	3
WT	71	2517	2	2	TSeries-07052019-0635-024	4p_200	4	200	1	51	0
WT	71	2517	2	2	TSeries-07052019-0635-025	4p_100	4	100	1	51	0
WT	71	2517	2	2	TSeries-07052019-0635-026	1p_500	1	500	1	51	2
WT	71	2517	2	2	TSeries-07052019-0635-027	1p_400	1	400	1	51	1
WT	71	2517	2	2	TSeries-07052019-0635-028	1p_300	1	300	1	51	0
WT	71	2517	2	2	TSeries-07052019-0635-029	1p_200	1	200	1	51	0
WT	71	2517	2	2	TSeries-07052019-0635-030	1p_100	1	100	1	51	0
WT	71	2517	2	2	TSeries-07052019-0635-031	4p_500_PTX_pre	4	500	1	51	11
WT	71	2517	2	2	TSeries-07052019-0635-032	4p_500_PTX_5min	4	500	1	51	24
WT	71	2517	2	2	TSeries-07052019-0635-033	4p_500_PTX_10min	4	500	1	51	48
WT	71	2517	2	2	TSeries-07052019-0635-034	4p_500_PTX_15min	4	500	1	51	49
WT	71	2517	2	2	TSeries-07052019-0635-035	4p_500_PTX_15min	4	500	1	51	43
WT	71	2517	2	2	TSeries-07052019-0635-036	1p_500_PTX_15min	1	500	1	51	40
WT	71	2517	3	3	TSeries-07052019-0635-041	4p_500	4	500	0	58	16
WT	71	2517	3	3	TSeries-07052019-0635-042	4p_400	4	400	0	58	20
WT	71	2517	3	3	TSeries-07052019-0635-043	4p_300	4	300	0	58	4
WT	71	2517	3	3	TSeries-07052019-0635-044	4p_200	4	200	0	58	0
WT	71	2517	3	3	TSeries-07052019-0635-045	4p_100	4	100	0	58	0
WT	71	2517	3	3	TSeries-07052019-0635-046	1p_500	1	500	0	58	1
WT	71	2517	3	3	TSeries-07052019-0635-047	1p_400	1	400	0	58	1
WT	71	2517	3	3	TSeries-07052019-0635-048	1p_300	1	300	0	58	0
WT	71	2517	3	3	TSeries-07052019-0635-049	1p_200	1	200	0	58	0
WT	71	2517	3	3	TSeries-07052019-0635-050	1p_100	1	100	0	58	0
WT	71	2517	3	4	TSeries-07052019-0635-051	4p_500	4	500	1	90	21
WT	71	2517	3	4	TSeries-07052019-0635-052	4p_400	4	400	1	90	12
WT	71	2517	3	4	TSeries-07052019-0635-053	4p_300	4	300	1	90	2
WT	71	2517	3	4	TSeries-07052019-0635-054	4p_200	4	200	1	90	2
WT	71	2517	3	4	TSeries-07052019-0635-055	4p_100	4	100	1	90	0
WT	71	2517	3	4	TSeries-07052019-0635-056	1p_500	1	500	1	90	3
WT	71	2517	3	4	TSeries-07052019-0635-057	1p_400	1	400	1	90	0
WT	71	2517	3	4	TSeries-07052019-0635-058	1p_300	1	300	1	90	2
WT	71	2517	3	4	TSeries-07052019-0635-059	1p_200	1	200	1	90	0
WT	71	2517	3	4	TSeries-07052019-0635-060	1p_100	1	100	1	90	0
WT	71	2517	3	4	TSeries-07052019-0635-061	4p_500_PTX_pre	4	500	1	90	37
WT	71	2517	3	4	TSeries-07052019-0635-062	4p_500_PTX_5min	4	500	1	90	74
WT	71	2517	3	4	TSeries-07052019-0635-063	4p_500_PTX_10min	4	500	1	90	90
WT	71	2517	3	4	TSeries-07052019-0635-064	4p_500_PTX_15min	4	500	1	90	90
WT	71	2517	3	4	TSeries-07052019-0635-065	1p_500_PTX_15min	1	500	1	90	90
WT	90	2512	1	1	TSeries-08262019-1414-015	4p_400_PTX_15min	4	400	1	75	50
WT	90	2512	2	2	TSeries-08262019-1414-016	4p_500	4	500	1	54	3
WT	90	2512	2	2	TSeries-08262019-1414-017	4p_400	4	400	1	54	7
WT	90	2512	2	2	TSeries-08262019-1414-018	4p_300	4	300	1	54	3
WT	90	2512	2	2	TSeries-08262019-1414-019	4p_200	4	200	1	54	5
WT	90	2512	2	2	TSeries-08262019-1414-020	4p_100	4	100	1	54	1
WT	90	2512	2	2	TSeries-08262019-1414-021	1p_500	1	500	1	54	4
WT	90	2512	2	2	TSeries-08262019-1414-022	1p_400	1	400	1	54	0
WT	90	2512	2	2	TSeries-08262019-1414-023	1p_300	1	300	1	54	1
WT	90	2512	2	2	TSeries-08262019-1414-024	1p_200	1	200	1	54	2
WT	90	2512	2	2	TSeries-08262019-1414-025	1p_100	1	100	1	54	3
WT	90	2512	2	2	TSeries-08262019-1414-026	4p_500_PTX_pre	4	500	1	54	10
WT	90	2512	2	2	TSeries-08262019-1414-027	4p_500_PTX_5min	4	500	1	54	46
WT	90	2512	2	2	TSeries-08262019-1414-028	4p_500_PTX_10min	4	500	1	54	51
WT	90	2512	2	2	TSeries-08262019-1414-029	4p_500_PTX_15min	4	500	1	54	50
WT	80	2660	1	1	TSeries-09252019-1031-001	4p_500	4	500	1	98	10
WT	80	2660	1	1	TSeries-09252019-1031-002	4p_400	4	400	1	98	12
WT	80	2660	1	1	TSeries-09252019-1031-003	4p_300	4	300	1	98	6
WT	80	2660	1	1	TSeries-09252019-1031-004	4p_200	4	200	1	98	1
WT	80	2660	1	1	TSeries-09252019-1031-005	4p_100	4	100	1	98	1
WT	80	2660	1	1	TSeries-09252019-1031-006	1p_500	1	500	1	98	2
WT	80	2660	1	1	TSeries-09252019-1031-007	1p_400	1	400	1	98	2
WT	80	2660	1	1	TSeries-09252019-1031-008	1p_300	1	300	1	98	3
WT	80	2660	1	1	TSeries-09252019-1031-009	1p_200	1	200	1	98	2
WT	80	2660	1	1	TSeries-09252019-1031-010	1p_100	1	100	1	98	0
WT	80	2660	1	1	TSeries-09252019-1031-012	4p_500_PTX_5min	4	500	1	98	70
WT	80	2660	1	1	TSeries-09252019-1031-013	4p_500_PTX_10min	4	500	1	98	95
WT	80	2660	2	2	TSeries-09252019-1031-021	4p_500	4	500	1	76	7
WT	80	2660	2	2	TSeries-09252019-1031-022	4p_400	4	400	1	76	4
WT	80	2660	2	2	TSeries-09252019-1031-023	4p_300	4	300	1	76	2
WT	80	2660	2	2	TSeries-09252019-1031-024	4p_200	4	200	1	76	1
WT	80	2660	2	2	TSeries-09252019-1031-025	4p_100	4	100	1	76	0
WT	80	2660	2	2	TSeries-09252019-1031-026	1p_500	1	500	1	76	0
WT	80	2660	2	2	TSeries-09252019-1031-027	1p_400	1	400	1	76	1
WT	80	2660	2	2	TSeries-09252019-1031-028	1p_300	1	300	1	76	0
WT	80	2660	2	2	TSeries-09252019-1031-029	1p_200	1	200	1	76	4
WT	80	2660	2	2	TSeries-09252019-1031-030	1p_100	1	100	1	76	1
WT	80	2660	2	2	TSeries-09252019-1031-031	4p_500_PTX_pre	4	500	1	76	19
WT	80	2660	2	2	TSeries-09252019-1031-032	4p_500_PTX_5min	4	500	1	76	74
WT	80	2660	2	2	TSeries-09252019-1031-033	4p_500_PTX_10min	4	500	1	76	76
WT	80	2660	3	3	TSeries-09252019-1031-041	4p_500	4	500	1	37	8
WT	80	2660	3	3	TSeries-09252019-1031-042	4p_400	4	400	1	37	7
WT	80	2660	3	3	TSeries-09252019-1031-043	4p_300	4	300	1	37	5
WT	80	2660	3	3	TSeries-09252019-1031-044	4p_200	4	200	1	37	0
WT	80	2660	3	3	TSeries-09252019-1031-045	4p_100	4	100	1	37	0
WT	80	2660	3	3	TSeries-09252019-1031-046	1p_500	1	500	1	37	0
WT	80	2660	3	3	TSeries-09252019-1031-047	1p_400	1	400	1	37	1
WT	80	2660	3	3	TSeries-09252019-1031-048	1p_300	1	300	1	37	1
WT	80	2660	3	3	TSeries-09252019-1031-049	1p_200	1	200	1	37	0
WT	80	2660	3	3	TSeries-09252019-1031-050	1p_100	1	100	1	37	1
WT	80	2660	3	3	TSeries-09252019-1031-051	4p_500_PTX_pre	4	500	1	37	7
WT	80	2660	3	3	TSeries-09252019-1031-052	4p_500_PTX_5min	4	500	1	37	35
WT	80	2660	3	3	TSeries-09252019-1031-053	4p_500_PTX_10min	4	500	1	37	32
WT	69	2782	1	1	TSeries-10092019-1054-001	4p_500	4	500	1	78	2
WT	69	2782	1	1	TSeries-10092019-1054-002	4p_400	4	400	1	78	3
WT	69	2782	1	1	TSeries-10092019-1054-003	4p_300	4	300	1	78	0
WT	69	2782	1	1	TSeries-10092019-1054-004	4p_200	4	200	1	78	0
WT	69	2782	1	1	TSeries-10092019-1054-005	4p_100	4	100	1	78	1
WT	69	2782	1	1	TSeries-10092019-1054-006	1p_500	1	500	1	78	0
WT	69	2782	1	1	TSeries-10092019-1054-007	1p_400	1	400	1	78	0
WT	69	2782	1	1	TSeries-10092019-1054-008	1p_300	1	300	1	78	0
WT	69	2782	1	1	TSeries-10092019-1054-009	1p_200	1	200	1	78	0
WT	69	2782	1	1	TSeries-10092019-1054-010	1p_100	1	100	1	78	0
WT	69	2782	1	1	TSeries-10092019-1054-011	4p_500_PTX_pre	4	500	1	78	6
WT	69	2782	1	1	TSeries-10092019-1054-012	4p_500_PTX_5min	4	500	1	78	25
WT	69	2782	1	1	TSeries-10092019-1054-013	4p_500_PTX_10min	4	500	1	78	58
WT	69	2782	2	2	TSeries-10092019-1054-014	4p_500	4	500	1	68	10
WT	69	2782	2	2	TSeries-10092019-1054-015	4p_400	4	400	1	68	2
WT	69	2782	2	2	TSeries-10092019-1054-016	4p_300	4	300	1	68	1
WT	69	2782	2	2	TSeries-10092019-1054-017	4p_200	4	200	1	68	0
WT	69	2782	2	2	TSeries-10092019-1054-018	4p_100	4	100	1	68	0
WT	69	2782	2	2	TSeries-10092019-1054-019	1p_500	1	500	1	68	0
WT	69	2782	2	2	TSeries-10092019-1054-020	1p_400	1	400	1	68	4
WT	69	2782	2	2	TSeries-10092019-1054-021	1p_300	1	300	1	68	0
WT	69	2782	2	2	TSeries-10092019-1054-022	1p_200	1	200	1	68	0
WT	69	2782	2	2	TSeries-10092019-1054-023	1p_100	1	100	1	68	0
WT	69	2782	2	2	TSeries-10092019-1054-024	4p_500_PTX_pre	4	500	1	68	11
WT	69	2782	2	2	TSeries-10092019-1054-025	4p_500_PTX_5min	4	500	1	68	56
WT	69	2782	2	2	TSeries-10092019-1054-026	4p_500_PTX_10min	4	500	1	68	68
WT	69	2782	3	3	TSeries-10092019-1054-030	4p_500	4	500	1	68	5
WT	69	2782	3	3	TSeries-10092019-1054-031	4p_400	4	400	1	68	3
WT	69	2782	3	3	TSeries-10092019-1054-032	4p_300	4	300	1	68	1
WT	69	2782	3	3	TSeries-10092019-1054-033	4p_200	4	200	1	68	1
WT	69	2782	3	3	TSeries-10092019-1054-034	4p_100	4	100	1	68	1
WT	69	2782	3	3	TSeries-10092019-1054-035	1p_500	1	500	1	68	3
WT	69	2782	3	3	TSeries-10092019-1054-036	1p_400	1	400	1	68	2
WT	69	2782	3	3	TSeries-10092019-1054-037	1p_300	1	300	1	68	1
WT	69	2782	3	3	TSeries-10092019-1054-038	1p_200	1	200	1	68	0
WT	69	2782	3	3	TSeries-10092019-1054-039	1p_100	1	100	1	68	1
WT	69	2782	3	3	TSeries-10092019-1054-040	4p_500_PTX_pre	4	500	1	68	9
WT	69	2782	3	3	TSeries-10092019-1054-041	4p_500_PTX_5min	4	500	1	68	59
WT	69	2782	3	3	TSeries-10092019-1054-042	4p_500_PTX_10min	4	500	1	68	67
WT	75	2790	1	1	TSeries-10152019-1105-001	4p_500	4	500	1	62	39
WT	75	2790	1	1	TSeries-10152019-1105-002	4p_400	4	400	1	62	26
WT	75	2790	1	1	TSeries-10152019-1105-003	4p_300	4	300	1	62	12
WT	75	2790	1	1	TSeries-10152019-1105-004	4p_200	4	200	1	62	5
WT	75	2790	1	1	TSeries-10152019-1105-005	4p_100	4	100	1	62	0
WT	75	2790	1	1	TSeries-10152019-1105-006	1p_500	1	500	1	62	7
WT	75	2790	1	1	TSeries-10152019-1105-007	1p_400	1	400	1	62	3
WT	75	2790	1	1	TSeries-10152019-1105-008	1p_300	1	300	1	62	1
WT	75	2790	1	1	TSeries-10152019-1105-009	1p_200	1	200	1	62	0
WT	75	2790	1	1	TSeries-10152019-1105-010	1p_100	1	100	1	62	1
WT	75	2790	1	1	TSeries-10152019-1105-011	4p_500_PTX_pre	4	500	1	62	56
WT	75	2790	1	1	TSeries-10152019-1105-012	4p_500_PTX_5min	4	500	1	62	62
WT	75	2790	1	1	TSeries-10152019-1105-013	4p_500_PTX_10min	4	500	1	62	62
WT	75	2790	2	2	TSeries-10092019-1054-024	4p_500	4	500	1	37	9
WT	75	2790	2	2	TSeries-10092019-1054-025	4p_400	4	400	1	37	17
WT	75	2790	2	2	TSeries-10092019-1054-026	4p_300	4	300	1	37	11
WT	75	2790	2	2	TSeries-10092019-1054-027	4p_200	4	200	1	37	3
WT	75	2790	2	2	TSeries-10092019-1054-028	4p_100	4	100	1	37	0
WT	75	2790	2	2	TSeries-10092019-1054-029	1p_500	1	500	1	37	0
WT	75	2790	2	2	TSeries-10092019-1054-030	1p_400	1	400	1	37	1
WT	75	2790	2	2	TSeries-10092019-1054-031	1p_300	1	300	1	37	2
WT	75	2790	2	2	TSeries-10092019-1054-032	1p_200	1	200	1	37	0
WT	75	2790	2	2	TSeries-10092019-1054-033	1p_100	1	100	1	37	0
WT	75	2790	2	2	TSeries-10092019-1054-034	4p_500_PTX_pre	4	500	1	37	15
WT	75	2790	2	2	TSeries-10092019-1054-035	4p_500_PTX_5min	4	500	1	37	34
WT	75	2790	2	2	TSeries-10092019-1054-036	4p_500_PTX_10min	4	500	1	37	37
WT	75	2790	3	3	TSeries-10092019-1054-042	4p_500	4	500	1	34	10
WT	75	2790	3	3	TSeries-10092019-1054-043	4p_400	4	400	1	34	6
WT	75	2790	3	3	TSeries-10092019-1054-044	4p_300	4	300	1	34	0
WT	75	2790	3	3	TSeries-10092019-1054-045	4p_200	4	200	1	34	0
WT	75	2790	3	3	TSeries-10092019-1054-046	4p_100	4	100	1	34	0
WT	75	2790	3	3	TSeries-10092019-1054-047	1p_500	1	500	1	34	1
WT	75	2790	3	3	TSeries-10092019-1054-048	1p_400	1	400	1	34	0
WT	75	2790	3	3	TSeries-10092019-1054-049	1p_300	1	300	1	34	1
WT	75	2790	3	3	TSeries-10092019-1054-050	1p_200	1	200	1	34	0
WT	75	2790	3	3	TSeries-10092019-1054-051	1p_100	1	100	1	34	0
WT	75	2790	3	3	TSeries-10092019-1054-052	4p_500_PTX_pre	4	500	1	34	15
WT	75	2790	3	3	TSeries-10092019-1054-053	4p_500_PTX_5min	4	500	1	34	26
WT	75	2790	3	3	TSeries-10092019-1054-054	4p_500_PTX_10min	4	500	1	34	30
WT	81	2787	1	1	TSeries-10212019-1115-001	4p_500	4	500	1	71	13
WT	81	2787	1	1	TSeries-10212019-1115-002	4p_400	4	400	1	71	7
WT	81	2787	1	1	TSeries-10212019-1115-003	4p_300	4	300	1	71	4
WT	81	2787	1	1	TSeries-10212019-1115-004	4p_200	4	200	1	71	3
WT	81	2787	1	1	TSeries-10212019-1115-005	4p_100	4	100	1	71	0
WT	81	2787	1	1	TSeries-10212019-1115-006	1p_500	1	500	1	71	2
WT	81	2787	1	1	TSeries-10212019-1115-007	1p_400	1	400	1	71	4
WT	81	2787	1	1	TSeries-10212019-1115-008	1p_300	1	300	1	71	1
WT	81	2787	1	1	TSeries-10212019-1115-009	1p_200	1	200	1	71	1
WT	81	2787	1	1	TSeries-10212019-1115-010	1p_100	1	100	1	71	0
WT	81	2787	1	1	TSeries-10212019-1115-011	4p_500_PTX_pre	4	500	1	71	18
WT	81	2787	1	1	TSeries-10212019-1115-012	4p_500_PTX_5min	4	500	1	71	24
WT	81	2787	1	1	TSeries-10212019-1115-013	4p_500_PTX_10min	4	500	1	71	65
WT	81	2787	2	2	TSeries-10212019-1115-017	4p_500	4	500	1	70	49
WT	81	2787	2	2	TSeries-10212019-1115-018	4p_400	4	400	1	70	12
WT	81	2787	2	2	TSeries-10212019-1115-019	4p_300	4	300	1	70	3
WT	81	2787	2	2	TSeries-10212019-1115-020	4p_200	4	200	1	70	3
WT	81	2787	2	2	TSeries-10212019-1115-021	4p_100	4	100	1	70	1
WT	81	2787	2	2	TSeries-10212019-1115-022	1p_500	1	500	1	70	14
WT	81	2787	2	2	TSeries-10212019-1115-023	1p_400	1	400	1	70	6
WT	81	2787	2	2	TSeries-10212019-1115-024	1p_300	1	300	1	70	0
WT	81	2787	2	2	TSeries-10212019-1115-025	1p_200	1	200	1	70	1
WT	81	2787	2	2	TSeries-10212019-1115-026	1p_100	1	100	1	70	0
WT	81	2787	2	2	TSeries-10212019-1115-027	4p_500_PTX_pre	4	500	1	70	69
WT	81	2787	2	2	TSeries-10212019-1115-028	4p_500_PTX_5min	4	500	1	70	70
WT	81	2787	2	2	TSeries-10212019-1115-029	4p_500_PTX_10min	4	500	1	70	69
WT	81	2787	3	3	TSeries-10212019-1115-033	4p_500	4	500	1	111	39
WT	81	2787	3	3	TSeries-10212019-1115-034	4p_400	4	400	1	111	10
WT	81	2787	3	3	TSeries-10212019-1115-035	4p_300	4	300	1	111	25
WT	81	2787	3	3	TSeries-10212019-1115-036	4p_200	4	200	1	111	4
WT	81	2787	3	3	TSeries-10212019-1115-037	4p_100	4	100	1	111	2
WT	81	2787	3	3	TSeries-10212019-1115-038	1p_500	1	500	1	111	1
WT	81	2787	3	3	TSeries-10212019-1115-039	1p_400	1	400	1	111	2
WT	81	2787	3	3	TSeries-10212019-1115-040	1p_300	1	300	1	111	1
WT	81	2787	3	3	TSeries-10212019-1115-041	1p_200	1	200	1	111	1
WT	81	2787	3	3	TSeries-10212019-1115-042	1p_100	1	100	1	111	1
WT	81	2787	3	3	TSeries-10212019-1115-043	4p_500_PTX_pre	4	500	1	111	16
WT	81	2787	3	3	TSeries-10212019-1115-044	4p_500_PTX_5min	4	500	1	111	40
WT	81	2787	3	3	TSeries-10212019-1115-045	4p_500_PTX_10min	4	500	1	111	92
