# Supplementary material for: Corticohippocampal circuit dysfunction in a mouse model of Dravet syndrome
Source: eLife. 2022 Feb 25;11:e69293. doi: 10.7554/eLife.69293 (PMC8920506; doi:10.7554/eLife.69293)
Supplement: Figure 2—source data 3. [file elife-69293-fig2-data3.xlsx]

## Sheet: early postnatal
Genotype	mouse	slice	field	Percentage Activated
Scn1a	4694	1	1	95.238
Scn1a	4694	2	2	100
Scn1a	4694	3	3	96.774
Scn1a	4687	1	1	91.667
Scn1a	4687	2	2	100
Scn1a	4687	3	3	100
Scn1a	4687	4	4	93.939
Scn1a	4688	1	1	100
Scn1a	4688	2	2	83.333
Scn1a	4688	3	3	95.455
Scn1a	4688	4	4	80
Scn1a	4688	5	5	82.927
Scn1a	4686	1	1	92.308
Scn1a	4686	2	2	100
Scn1a	4686	3	3	100
Scn1a	4686	4	4	77.273
WT	4692	1	1	96
WT	4692	2	2	90.625
WT	4692	3	3	92.308
WT	4689	1	1	87.5
WT	4689	2	2	73.333
WT	4691	1	1	87.5
WT	4691	2	2	90.476
WT	4691	3	3	92.308
WT	4690	1	1	97.5
WT	4690	2	2	100
WT	4690	3	3	95.455
WT	4693	1	1	53.333
WT	4693	2	2	85.185
WT	4693	3	3	93.103
WT	4693	4	4	71.875
WT	4693	5	5	100

## Sheet: young adult
Genotype	mouse	slice	field	Percentage Activated
Scn1a	2513	1	1	95.89
Scn1a	2513	2	2	100
Scn1a	2783	1	1	100
Scn1a	2783	2	5	97.03
Scn1a	2783	3	6	95.833
Scn1a	2783	4	7	96.667
Scn1a	2814	1	1	72.84
Scn1a	2860	1	1	100
Scn1a	2860	2	2	95.876
Scn1a	2871	1	1	98.361
Scn1a	2871	2	2	98.02
Scn1a	2910	1	2	92.661
Scn1a	2910	2	4	95.161
Scn1a	2909	1	3	99.145
WT	2517	1	1	100
WT	2517	2	2	94.118
WT	2517	3	4	100
WT	2512	2	2	94.444
WT	2660	1	1	96.939
WT	2660	2	2	100
WT	2660	3	3	86.486
WT	2782	1	1	74.359
WT	2782	2	2	100
WT	2782	3	3	98.529
WT	2790	1	1	100
WT	2790	2	2	100
WT	2790	3	3	88.235
WT	2787	1	1	91.549
WT	2787	2	2	98.571
WT	2787	3	3	82.883
