# Supplementary material for: Corticohippocampal circuit dysfunction in a mouse model of Dravet syndrome
Source: eLife. 2022 Feb 25;11:e69293. doi: 10.7554/eLife.69293 (PMC8920506; doi:10.7554/eLife.69293)
Supplement: Figure 4—source data 1. [file elife-69293-fig4-data1.xlsx]

## Sheet: data by cell
Genotype	age	mouse	slice	field	File name	condition	pulses	power	Cell Num	Activation	Amplitude
Scn1a	66	4662	2	2	TSeries-101852021-1121-011	4p_500 pre Hm1a	4	500	0	1	0.574805
Scn1a	66	4662	2	2	TSeries-101852021-1121-011	4p_500 pre Hm1a	4	500	1	1	0.709743
Scn1a	66	4662	2	2	TSeries-101852021-1121-011	4p_500 pre Hm1a	4	500	2	1	1.14897
Scn1a	66	4662	2	2	TSeries-101852021-1121-011	4p_500 pre Hm1a	4	500	3	1	0.903784
Scn1a	66	4662	2	2	TSeries-101852021-1121-011	4p_500 pre Hm1a	4	500	4	1	0.767502
Scn1a	66	4662	2	2	TSeries-101852021-1121-011	4p_500 pre Hm1a	4	500	5	1	0.770214
Scn1a	66	4662	2	2	TSeries-101852021-1121-011	4p_500 pre Hm1a	4	500	6	1	1.04047
Scn1a	66	4662	2	2	TSeries-101852021-1121-011	4p_500 pre Hm1a	4	500	7	1	0.927923
Scn1a	66	4662	2	2	TSeries-101852021-1121-011	4p_500 pre Hm1a	4	500	8	1	1.0587
Scn1a	66	4662	2	2	TSeries-101852021-1121-011	4p_500 pre Hm1a	4	500	9	1	0.685832
Scn1a	66	4662	2	2	TSeries-101852021-1121-011	4p_500 pre Hm1a	4	500	10	1	0.53654
Scn1a	66	4662	2	2	TSeries-101852021-1121-011	4p_500 pre Hm1a	4	500	11	1	0.979937
Scn1a	66	4662	2	2	TSeries-101852021-1121-011	4p_500 pre Hm1a	4	500	12	1	0.613106
Scn1a	66	4662	2	2	TSeries-101852021-1121-011	4p_500 pre Hm1a	4	500	13	1	0.835038
Scn1a	66	4662	2	2	TSeries-101852021-1121-011	4p_500 pre Hm1a	4	500	14	1	0.685284
Scn1a	66	4662	2	2	TSeries-101852021-1121-011	4p_500 pre Hm1a	4	500	15	1	1.11221
Scn1a	66	4662	2	2	TSeries-101852021-1121-011	4p_500 pre Hm1a	4	500	16	1	0.970721
Scn1a	66	4662	2	2	TSeries-101852021-1121-011	4p_500 pre Hm1a	4	500	17	1	0.720904
Scn1a	66	4662	2	2	TSeries-101852021-1121-011	4p_500 pre Hm1a	4	500	18	1	0.98307
Scn1a	66	4662	2	2	TSeries-101852021-1121-011	4p_500 pre Hm1a	4	500	19	1	1.02665
Scn1a	66	4662	2	2	TSeries-101852021-1121-011	4p_500 pre Hm1a	4	500	20	1	0.767589
Scn1a	66	4662	2	2	TSeries-101852021-1121-011	4p_500 pre Hm1a	4	500	21	1	0.904412
Scn1a	66	4662	2	2	TSeries-101852021-1121-011	4p_500 pre Hm1a	4	500	22	1	0.483182
Scn1a	66	4662	2	2	TSeries-101852021-1121-011	4p_500 pre Hm1a	4	500	23	1	0.586189
Scn1a	66	4662	2	2	TSeries-101852021-1121-011	4p_500 pre Hm1a	4	500	24	1	0.456803
Scn1a	66	4662	2	2	TSeries-101852021-1121-011	4p_500 pre Hm1a	4	500	25	1	0.7858
Scn1a	66	4662	2	2	TSeries-101852021-1121-011	4p_500 pre Hm1a	4	500	26	1	0.645252
Scn1a	66	4662	2	2	TSeries-101852021-1121-011	4p_500 pre Hm1a	4	500	27	1	0.66435
Scn1a	66	4662	2	2	TSeries-101852021-1121-011	4p_500 pre Hm1a	4	500	28	1	0.588738
Scn1a	66	4662	2	2	TSeries-101852021-1121-011	4p_500 pre Hm1a	4	500	29	1	0.67741
Scn1a	66	4662	2	2	TSeries-101852021-1121-011	4p_500 pre Hm1a	4	500	30	1	0.786983
Scn1a	66	4662	2	2	TSeries-101852021-1121-011	4p_500 pre Hm1a	4	500	31	1	1.0648
Scn1a	66	4662	2	2	TSeries-101852021-1121-011	4p_500 pre Hm1a	4	500	32	1	0.515837
Scn1a	66	4662	2	2	TSeries-101852021-1121-011	4p_500 pre Hm1a	4	500	33	1	0.518508
Scn1a	66	4662	2	2	TSeries-101852021-1121-011	4p_500 pre Hm1a	4	500	34	0
Scn1a	66	4662	2	2	TSeries-101852021-1121-011	4p_500 pre Hm1a	4	500	35	1	0.59634
Scn1a	66	4662	2	2	TSeries-101852021-1121-011	4p_500 pre Hm1a	4	500	36	1	0.947038
Scn1a	66	4662	2	2	TSeries-101852021-1121-011	4p_500 pre Hm1a	4	500	37	1	0.785301
Scn1a	66	4662	2	2	TSeries-101852021-1121-011	4p_500 pre Hm1a	4	500	38	1	0.731474
Scn1a	66	4662	2	2	TSeries-101852021-1121-011	4p_500 pre Hm1a	4	500	39	1	0.526284
Scn1a	66	4662	2	2	TSeries-101852021-1121-011	4p_500 pre Hm1a	4	500	40	1	0.495147
Scn1a	66	4662	2	2	TSeries-101852021-1121-016	4p_500 Hm1a	4	500	0	1	0.622578
Scn1a	66	4662	2	2	TSeries-101852021-1121-016	4p_500 Hm1a	4	500	1	1	0.798361
Scn1a	66	4662	2	2	TSeries-101852021-1121-016	4p_500 Hm1a	4	500	2	1	1.31293
Scn1a	66	4662	2	2	TSeries-101852021-1121-016	4p_500 Hm1a	4	500	3	1	0.96748
Scn1a	66	4662	2	2	TSeries-101852021-1121-016	4p_500 Hm1a	4	500	4	1	1.07356
Scn1a	66	4662	2	2	TSeries-101852021-1121-016	4p_500 Hm1a	4	500	5	1	0.70123
Scn1a	66	4662	2	2	TSeries-101852021-1121-016	4p_500 Hm1a	4	500	6	1	1.0579
Scn1a	66	4662	2	2	TSeries-101852021-1121-016	4p_500 Hm1a	4	500	7	1	0.968775
Scn1a	66	4662	2	2	TSeries-101852021-1121-016	4p_500 Hm1a	4	500	8	1	0.947539
Scn1a	66	4662	2	2	TSeries-101852021-1121-016	4p_500 Hm1a	4	500	9	1	0.683184
Scn1a	66	4662	2	2	TSeries-101852021-1121-016	4p_500 Hm1a	4	500	10	1	0.638256
Scn1a	66	4662	2	2	TSeries-101852021-1121-016	4p_500 Hm1a	4	500	11	1	1.23965
Scn1a	66	4662	2	2	TSeries-101852021-1121-016	4p_500 Hm1a	4	500	12	1	0.858263
Scn1a	66	4662	2	2	TSeries-101852021-1121-016	4p_500 Hm1a	4	500	13	1	1.03031
Scn1a	66	4662	2	2	TSeries-101852021-1121-016	4p_500 Hm1a	4	500	14	1	0.728999
Scn1a	66	4662	2	2	TSeries-101852021-1121-016	4p_500 Hm1a	4	500	15	1	1.2143
Scn1a	66	4662	2	2	TSeries-101852021-1121-016	4p_500 Hm1a	4	500	16	1	0.969762
Scn1a	66	4662	2	2	TSeries-101852021-1121-016	4p_500 Hm1a	4	500	17	1	0.753684
Scn1a	66	4662	2	2	TSeries-101852021-1121-016	4p_500 Hm1a	4	500	18	1	0.805073
Scn1a	66	4662	2	2	TSeries-101852021-1121-016	4p_500 Hm1a	4	500	19	1	0.775523
Scn1a	66	4662	2	2	TSeries-101852021-1121-016	4p_500 Hm1a	4	500	20	1	0.941927
Scn1a	66	4662	2	2	TSeries-101852021-1121-016	4p_500 Hm1a	4	500	21	1	0.822908
Scn1a	66	4662	2	2	TSeries-101852021-1121-016	4p_500 Hm1a	4	500	22	1	0.567421
Scn1a	66	4662	2	2	TSeries-101852021-1121-016	4p_500 Hm1a	4	500	23	1	0.637884
Scn1a	66	4662	2	2	TSeries-101852021-1121-016	4p_500 Hm1a	4	500	24	1	0.508317
Scn1a	66	4662	2	2	TSeries-101852021-1121-016	4p_500 Hm1a	4	500	25	1	1.00387
Scn1a	66	4662	2	2	TSeries-101852021-1121-016	4p_500 Hm1a	4	500	26	1	0.553697
Scn1a	66	4662	2	2	TSeries-101852021-1121-016	4p_500 Hm1a	4	500	27	1	0.772924
Scn1a	66	4662	2	2	TSeries-101852021-1121-016	4p_500 Hm1a	4	500	28	1	0.701082
Scn1a	66	4662	2	2	TSeries-101852021-1121-016	4p_500 Hm1a	4	500	29	1	0.901668
Scn1a	66	4662	2	2	TSeries-101852021-1121-016	4p_500 Hm1a	4	500	30	1	0.83127
Scn1a	66	4662	2	2	TSeries-101852021-1121-016	4p_500 Hm1a	4	500	31	0
Scn1a	66	4662	2	2	TSeries-101852021-1121-016	4p_500 Hm1a	4	500	32	1	0.447838
Scn1a	66	4662	2	2	TSeries-101852021-1121-016	4p_500 Hm1a	4	500	33	1	0.622873
Scn1a	66	4662	2	2	TSeries-101852021-1121-016	4p_500 Hm1a	4	500	34	1	0.92646
Scn1a	66	4662	2	2	TSeries-101852021-1121-016	4p_500 Hm1a	4	500	35	1	0.745855
Scn1a	66	4662	2	2	TSeries-101852021-1121-016	4p_500 Hm1a	4	500	36	1	1.1649
Scn1a	66	4662	2	2	TSeries-101852021-1121-016	4p_500 Hm1a	4	500	37	1	0.85159
Scn1a	66	4662	2	2	TSeries-101852021-1121-016	4p_500 Hm1a	4	500	38	1	0.693954
Scn1a	66	4662	2	2	TSeries-101852021-1121-016	4p_500 Hm1a	4	500	39	1	0.587441
Scn1a	66	4662	2	2	TSeries-101852021-1121-016	4p_500 Hm1a	4	500	40	1	0.570257
Scn1a	66	4662	3	3	TSeries-101852021-1121-021	4p_500 pre Hm1a	4	500	0	1	0.395408
Scn1a	66	4662	3	3	TSeries-101852021-1121-021	4p_500 pre Hm1a	4	500	1	1	0.178697
Scn1a	66	4662	3	3	TSeries-101852021-1121-021	4p_500 pre Hm1a	4	500	2	1	0.228907
Scn1a	66	4662	3	3	TSeries-101852021-1121-021	4p_500 pre Hm1a	4	500	3	1	0.689171
Scn1a	66	4662	3	3	TSeries-101852021-1121-021	4p_500 pre Hm1a	4	500	4	1	0.154314
Scn1a	66	4662	3	3	TSeries-101852021-1121-021	4p_500 pre Hm1a	4	500	5	0
Scn1a	66	4662	3	3	TSeries-101852021-1121-021	4p_500 pre Hm1a	4	500	6	1	0.107153
Scn1a	66	4662	3	3	TSeries-101852021-1121-021	4p_500 pre Hm1a	4	500	7	0
Scn1a	66	4662	3	3	TSeries-101852021-1121-021	4p_500 pre Hm1a	4	500	8	0
Scn1a	66	4662	3	3	TSeries-101852021-1121-021	4p_500 pre Hm1a	4	500	9	1	0.110753
Scn1a	66	4662	3	3	TSeries-101852021-1121-021	4p_500 pre Hm1a	4	500	10	1	0.139792
Scn1a	66	4662	3	3	TSeries-101852021-1121-021	4p_500 pre Hm1a	4	500	11	0
Scn1a	66	4662	3	3	TSeries-101852021-1121-021	4p_500 pre Hm1a	4	500	12	1	0.419427
Scn1a	66	4662	3	3	TSeries-101852021-1121-021	4p_500 pre Hm1a	4	500	13	1	0.421625
Scn1a	66	4662	3	3	TSeries-101852021-1121-021	4p_500 pre Hm1a	4	500	14	1	0.352445
Scn1a	66	4662	3	3	TSeries-101852021-1121-021	4p_500 pre Hm1a	4	500	15	0
Scn1a	66	4662	3	3	TSeries-101852021-1121-021	4p_500 pre Hm1a	4	500	16	1	0.630916
Scn1a	66	4662	3	3	TSeries-101852021-1121-021	4p_500 pre Hm1a	4	500	17	1	0.422091
Scn1a	66	4662	3	3	TSeries-101852021-1121-021	4p_500 pre Hm1a	4	500	18	1	0.485564
Scn1a	66	4662	3	3	TSeries-101852021-1121-021	4p_500 pre Hm1a	4	500	19	1	0.328811
Scn1a	66	4662	3	3	TSeries-101852021-1121-021	4p_500 pre Hm1a	4	500	20	1	0.542085
Scn1a	66	4662	3	3	TSeries-101852021-1121-021	4p_500 pre Hm1a	4	500	21	1	0.362335
Scn1a	66	4662	3	3	TSeries-101852021-1121-021	4p_500 pre Hm1a	4	500	22	0
Scn1a	66	4662	3	3	TSeries-101852021-1121-021	4p_500 pre Hm1a	4	500	23	0
Scn1a	66	4662	3	3	TSeries-101852021-1121-021	4p_500 pre Hm1a	4	500	24	1	0.210053
Scn1a	66	4662	3	3	TSeries-101852021-1121-021	4p_500 pre Hm1a	4	500	25	1	0.778182
Scn1a	66	4662	3	3	TSeries-101852021-1121-021	4p_500 pre Hm1a	4	500	26	1	0.425314
Scn1a	66	4662	3	3	TSeries-101852021-1121-021	4p_500 pre Hm1a	4	500	27	1	0.322306
Scn1a	66	4662	3	3	TSeries-101852021-1121-021	4p_500 pre Hm1a	4	500	28	1	0.552496
Scn1a	66	4662	3	3	TSeries-101852021-1121-021	4p_500 pre Hm1a	4	500	29	1	0.583787
Scn1a	66	4662	3	3	TSeries-101852021-1121-021	4p_500 pre Hm1a	4	500	30	1	0.791449
Scn1a	66	4662	3	3	TSeries-101852021-1121-021	4p_500 pre Hm1a	4	500	31	1	0.502544
Scn1a	66	4662	3	3	TSeries-101852021-1121-021	4p_500 pre Hm1a	4	500	32	1	0.502308
Scn1a	66	4662	3	3	TSeries-101852021-1121-021	4p_500 pre Hm1a	4	500	33	1	0.491859
Scn1a	66	4662	3	3	TSeries-101852021-1121-021	4p_500 pre Hm1a	4	500	34	1	0.75718
Scn1a	66	4662	3	3	TSeries-101852021-1121-021	4p_500 pre Hm1a	4	500	35	1	0.589699
Scn1a	66	4662	3	3	TSeries-101852021-1121-021	4p_500 pre Hm1a	4	500	36	1	0.461085
Scn1a	66	4662	3	3	TSeries-101852021-1121-021	4p_500 pre Hm1a	4	500	37	1	0.27244
Scn1a	66	4662	3	3	TSeries-101852021-1121-021	4p_500 pre Hm1a	4	500	38	1	0.455319
Scn1a	66	4662	3	3	TSeries-101852021-1121-021	4p_500 pre Hm1a	4	500	39	1	0.187136
Scn1a	66	4662	3	3	TSeries-101852021-1121-021	4p_500 pre Hm1a	4	500	40	1	0.528195
Scn1a	66	4662	3	3	TSeries-101852021-1121-021	4p_500 pre Hm1a	4	500	41	1	0.387387
Scn1a	66	4662	3	3	TSeries-101852021-1121-021	4p_500 pre Hm1a	4	500	42	1	0.419733
Scn1a	66	4662	3	3	TSeries-101852021-1121-021	4p_500 pre Hm1a	4	500	43	1	0.287518
Scn1a	66	4662	3	3	TSeries-101852021-1121-021	4p_500 pre Hm1a	4	500	44	0
Scn1a	66	4662	3	3	TSeries-101852021-1121-021	4p_500 pre Hm1a	4	500	45	0
Scn1a	66	4662	3	3	TSeries-101852021-1121-021	4p_500 pre Hm1a	4	500	46	1	0.619286
Scn1a	66	4662	3	3	TSeries-101852021-1121-021	4p_500 pre Hm1a	4	500	47	1	0.222186
Scn1a	66	4662	3	3	TSeries-101852021-1121-021	4p_500 pre Hm1a	4	500	48	0
Scn1a	66	4662	3	3	TSeries-101852021-1121-021	4p_500 pre Hm1a	4	500	49	1	0.489816
Scn1a	66	4662	3	3	TSeries-101852021-1121-021	4p_500 pre Hm1a	4	500	50	0
Scn1a	66	4662	3	3	TSeries-101852021-1121-021	4p_500 pre Hm1a	4	500	51	1	0.378444
Scn1a	66	4662	3	3	TSeries-101852021-1121-021	4p_500 pre Hm1a	4	500	52	0
Scn1a	66	4662	3	3	TSeries-101852021-1121-021	4p_500 pre Hm1a	4	500	53	0
Scn1a	66	4662	3	3	TSeries-101852021-1121-021	4p_500 pre Hm1a	4	500	54	1	0.470687
Scn1a	66	4662	3	3	TSeries-101852021-1121-021	4p_500 pre Hm1a	4	500	55	1	0.418633
Scn1a	66	4662	3	3	TSeries-101852021-1121-021	4p_500 pre Hm1a	4	500	56	1	0.352725
Scn1a	66	4662	3	3	TSeries-101852021-1121-021	4p_500 pre Hm1a	4	500	57	0
Scn1a	66	4662	3	3	TSeries-101852021-1121-021	4p_500 pre Hm1a	4	500	58	1	0.206795
Scn1a	66	4662	3	3	TSeries-101852021-1121-021	4p_500 pre Hm1a	4	500	59	1	0.51173
Scn1a	66	4662	3	3	TSeries-101852021-1121-021	4p_500 pre Hm1a	4	500	60	1	0.293997
Scn1a	66	4662	3	3	TSeries-101852021-1121-021	4p_500 pre Hm1a	4	500	61	1	0.29176
Scn1a	66	4662	3	3	TSeries-101852021-1121-021	4p_500 pre Hm1a	4	500	62	0
Scn1a	66	4662	3	3	TSeries-101852021-1121-021	4p_500 pre Hm1a	4	500	63	1	0.206926
Scn1a	66	4662	3	3	TSeries-101852021-1121-021	4p_500 pre Hm1a	4	500	64	1	0.242593
Scn1a	66	4662	3	3	TSeries-101852021-1121-021	4p_500 pre Hm1a	4	500	65	0
Scn1a	66	4662	3	3	TSeries-101852021-1121-021	4p_500 pre Hm1a	4	500	66	1	0.288154
Scn1a	66	4662	3	3	TSeries-101852021-1121-021	4p_500 pre Hm1a	4	500	67	1	0.737387
Scn1a	66	4662	3	3	TSeries-101852021-1121-021	4p_500 pre Hm1a	4	500	68	1	0.294935
Scn1a	66	4662	3	3	TSeries-101852021-1121-021	4p_500 pre Hm1a	4	500	69	1	0.320241
Scn1a	66	4662	3	3	TSeries-101852021-1121-021	4p_500 pre Hm1a	4	500	70	1	0.256771
Scn1a	66	4662	3	3	TSeries-101852021-1121-021	4p_500 pre Hm1a	4	500	71	1	0.555309
Scn1a	66	4662	3	3	TSeries-101852021-1121-021	4p_500 pre Hm1a	4	500	72	1	0.219637
Scn1a	66	4662	3	3	TSeries-101852021-1121-026	4p_500 Hm1a	4	500	0	0
Scn1a	66	4662	3	3	TSeries-101852021-1121-026	4p_500 Hm1a	4	500	1	0
Scn1a	66	4662	3	3	TSeries-101852021-1121-026	4p_500 Hm1a	4	500	2	1	0.339406
Scn1a	66	4662	3	3	TSeries-101852021-1121-026	4p_500 Hm1a	4	500	3	0
Scn1a	66	4662	3	3	TSeries-101852021-1121-026	4p_500 Hm1a	4	500	4	0
Scn1a	66	4662	3	3	TSeries-101852021-1121-026	4p_500 Hm1a	4	500	5	0
Scn1a	66	4662	3	3	TSeries-101852021-1121-026	4p_500 Hm1a	4	500	6	0
Scn1a	66	4662	3	3	TSeries-101852021-1121-026	4p_500 Hm1a	4	500	7	0
Scn1a	66	4662	3	3	TSeries-101852021-1121-026	4p_500 Hm1a	4	500	8	0
Scn1a	66	4662	3	3	TSeries-101852021-1121-026	4p_500 Hm1a	4	500	9	0
Scn1a	66	4662	3	3	TSeries-101852021-1121-026	4p_500 Hm1a	4	500	10	0
Scn1a	66	4662	3	3	TSeries-101852021-1121-026	4p_500 Hm1a	4	500	11	0
Scn1a	66	4662	3	3	TSeries-101852021-1121-026	4p_500 Hm1a	4	500	12	0
Scn1a	66	4662	3	3	TSeries-101852021-1121-026	4p_500 Hm1a	4	500	13	1	0.310001
Scn1a	66	4662	3	3	TSeries-101852021-1121-026	4p_500 Hm1a	4	500	14	1	0.321627
Scn1a	66	4662	3	3	TSeries-101852021-1121-026	4p_500 Hm1a	4	500	15	0
Scn1a	66	4662	3	3	TSeries-101852021-1121-026	4p_500 Hm1a	4	500	16	1	0.383038
Scn1a	66	4662	3	3	TSeries-101852021-1121-026	4p_500 Hm1a	4	500	17	1	0.240246
Scn1a	66	4662	3	3	TSeries-101852021-1121-026	4p_500 Hm1a	4	500	18	0
Scn1a	66	4662	3	3	TSeries-101852021-1121-026	4p_500 Hm1a	4	500	19	0
Scn1a	66	4662	3	3	TSeries-101852021-1121-026	4p_500 Hm1a	4	500	20	0
Scn1a	66	4662	3	3	TSeries-101852021-1121-026	4p_500 Hm1a	4	500	21	0
Scn1a	66	4662	3	3	TSeries-101852021-1121-026	4p_500 Hm1a	4	500	22	0
Scn1a	66	4662	3	3	TSeries-101852021-1121-026	4p_500 Hm1a	4	500	23	0
Scn1a	66	4662	3	3	TSeries-101852021-1121-026	4p_500 Hm1a	4	500	24	0
Scn1a	66	4662	3	3	TSeries-101852021-1121-026	4p_500 Hm1a	4	500	25	1	0.769382
Scn1a	66	4662	3	3	TSeries-101852021-1121-026	4p_500 Hm1a	4	500	26	1	0.431196
Scn1a	66	4662	3	3	TSeries-101852021-1121-026	4p_500 Hm1a	4	500	27	1	0.417213
Scn1a	66	4662	3	3	TSeries-101852021-1121-026	4p_500 Hm1a	4	500	28	1	0.452898
Scn1a	66	4662	3	3	TSeries-101852021-1121-026	4p_500 Hm1a	4	500	29	1	0.364088
Scn1a	66	4662	3	3	TSeries-101852021-1121-026	4p_500 Hm1a	4	500	30	1	0.451947
Scn1a	66	4662	3	3	TSeries-101852021-1121-026	4p_500 Hm1a	4	500	31	1	0.244155
Scn1a	66	4662	3	3	TSeries-101852021-1121-026	4p_500 Hm1a	4	500	32	1	0.211591
Scn1a	66	4662	3	3	TSeries-101852021-1121-026	4p_500 Hm1a	4	500	33	1	0.474256
Scn1a	66	4662	3	3	TSeries-101852021-1121-026	4p_500 Hm1a	4	500	34	1	0.540147
Scn1a	66	4662	3	3	TSeries-101852021-1121-026	4p_500 Hm1a	4	500	35	1	0.521422
Scn1a	66	4662	3	3	TSeries-101852021-1121-026	4p_500 Hm1a	4	500	36	1	0.550274
Scn1a	66	4662	3	3	TSeries-101852021-1121-026	4p_500 Hm1a	4	500	37	1	0.25894
Scn1a	66	4662	3	3	TSeries-101852021-1121-026	4p_500 Hm1a	4	500	38	0
Scn1a	66	4662	3	3	TSeries-101852021-1121-026	4p_500 Hm1a	4	500	39	1	0.17983
Scn1a	66	4662	3	3	TSeries-101852021-1121-026	4p_500 Hm1a	4	500	40	1	0.317217
Scn1a	66	4662	3	3	TSeries-101852021-1121-026	4p_500 Hm1a	4	500	41	1	0.214958
Scn1a	66	4662	3	3	TSeries-101852021-1121-026	4p_500 Hm1a	4	500	42	0
Scn1a	66	4662	3	3	TSeries-101852021-1121-026	4p_500 Hm1a	4	500	43	0
Scn1a	66	4662	3	3	TSeries-101852021-1121-026	4p_500 Hm1a	4	500	44	0
Scn1a	66	4662	3	3	TSeries-101852021-1121-026	4p_500 Hm1a	4	500	45	1	0.105056
Scn1a	66	4662	3	3	TSeries-101852021-1121-026	4p_500 Hm1a	4	500	46	1	0.240006
Scn1a	66	4662	3	3	TSeries-101852021-1121-026	4p_500 Hm1a	4	500	47	0
Scn1a	66	4662	3	3	TSeries-101852021-1121-026	4p_500 Hm1a	4	500	48	0
Scn1a	66	4662	3	3	TSeries-101852021-1121-026	4p_500 Hm1a	4	500	49	1	0.170673
Scn1a	66	4662	3	3	TSeries-101852021-1121-026	4p_500 Hm1a	4	500	50	0
Scn1a	66	4662	3	3	TSeries-101852021-1121-026	4p_500 Hm1a	4	500	51	1	0.253801
Scn1a	66	4662	3	3	TSeries-101852021-1121-026	4p_500 Hm1a	4	500	52	0
Scn1a	66	4662	3	3	TSeries-101852021-1121-026	4p_500 Hm1a	4	500	53	0
Scn1a	66	4662	3	3	TSeries-101852021-1121-026	4p_500 Hm1a	4	500	54	1	0.230935
Scn1a	66	4662	3	3	TSeries-101852021-1121-026	4p_500 Hm1a	4	500	55	0
Scn1a	66	4662	3	3	TSeries-101852021-1121-026	4p_500 Hm1a	4	500	56	0
Scn1a	66	4662	3	3	TSeries-101852021-1121-026	4p_500 Hm1a	4	500	57	0
Scn1a	66	4662	3	3	TSeries-101852021-1121-026	4p_500 Hm1a	4	500	58	1	0.26021
Scn1a	66	4662	3	3	TSeries-101852021-1121-026	4p_500 Hm1a	4	500	59	1	0.352704
Scn1a	66	4662	3	3	TSeries-101852021-1121-026	4p_500 Hm1a	4	500	60	1	0.264957
Scn1a	66	4662	3	3	TSeries-101852021-1121-026	4p_500 Hm1a	4	500	61	0
Scn1a	66	4662	3	3	TSeries-101852021-1121-026	4p_500 Hm1a	4	500	62	0
Scn1a	66	4662	3	3	TSeries-101852021-1121-026	4p_500 Hm1a	4	500	63	0
Scn1a	66	4662	3	3	TSeries-101852021-1121-026	4p_500 Hm1a	4	500	64	0
Scn1a	66	4662	3	3	TSeries-101852021-1121-026	4p_500 Hm1a	4	500	65	0
Scn1a	66	4662	3	3	TSeries-101852021-1121-026	4p_500 Hm1a	4	500	66	1	0.186209
Scn1a	66	4662	3	3	TSeries-101852021-1121-026	4p_500 Hm1a	4	500	67	1	0.455148
Scn1a	66	4662	3	3	TSeries-101852021-1121-026	4p_500 Hm1a	4	500	68	1	0.216215
Scn1a	66	4662	3	3	TSeries-101852021-1121-026	4p_500 Hm1a	4	500	69	1	0.307056
Scn1a	66	4662	3	3	TSeries-101852021-1121-026	4p_500 Hm1a	4	500	70	0
Scn1a	66	4662	3	3	TSeries-101852021-1121-026	4p_500 Hm1a	4	500	71	1	0.59976
Scn1a	66	4662	3	3	TSeries-101852021-1121-026	4p_500 Hm1a	4	500	72	0
Scn1a	66	4662	4	4	TSeries-101852021-1121-031	4p_500 pre Hm1a	4	500	0	1	0.379326
Scn1a	66	4662	4	4	TSeries-101852021-1121-031	4p_500 pre Hm1a	4	500	1	0
Scn1a	66	4662	4	4	TSeries-101852021-1121-031	4p_500 pre Hm1a	4	500	2	1	0.423735
Scn1a	66	4662	4	4	TSeries-101852021-1121-031	4p_500 pre Hm1a	4	500	3	1	0.352807
Scn1a	66	4662	4	4	TSeries-101852021-1121-031	4p_500 pre Hm1a	4	500	4	0
Scn1a	66	4662	4	4	TSeries-101852021-1121-031	4p_500 pre Hm1a	4	500	5	1	0.244443
Scn1a	66	4662	4	4	TSeries-101852021-1121-031	4p_500 pre Hm1a	4	500	6	1	0.340774
Scn1a	66	4662	4	4	TSeries-101852021-1121-031	4p_500 pre Hm1a	4	500	7	0
Scn1a	66	4662	4	4	TSeries-101852021-1121-031	4p_500 pre Hm1a	4	500	8	0
Scn1a	66	4662	4	4	TSeries-101852021-1121-031	4p_500 pre Hm1a	4	500	9	0
Scn1a	66	4662	4	4	TSeries-101852021-1121-031	4p_500 pre Hm1a	4	500	10	1	0.327496
Scn1a	66	4662	4	4	TSeries-101852021-1121-031	4p_500 pre Hm1a	4	500	11	1	0.259509
Scn1a	66	4662	4	4	TSeries-101852021-1121-031	4p_500 pre Hm1a	4	500	12	1	0.207153
Scn1a	66	4662	4	4	TSeries-101852021-1121-031	4p_500 pre Hm1a	4	500	13	1	0.320324
Scn1a	66	4662	4	4	TSeries-101852021-1121-031	4p_500 pre Hm1a	4	500	14	1	0.244659
Scn1a	66	4662	4	4	TSeries-101852021-1121-031	4p_500 pre Hm1a	4	500	15	0
Scn1a	66	4662	4	4	TSeries-101852021-1121-031	4p_500 pre Hm1a	4	500	16	0
Scn1a	66	4662	4	4	TSeries-101852021-1121-031	4p_500 pre Hm1a	4	500	17	0
Scn1a	66	4662	4	4	TSeries-101852021-1121-031	4p_500 pre Hm1a	4	500	18	0
Scn1a	66	4662	4	4	TSeries-101852021-1121-031	4p_500 pre Hm1a	4	500	19	1	0.340448
Scn1a	66	4662	4	4	TSeries-101852021-1121-031	4p_500 pre Hm1a	4	500	20	1	0.143829
Scn1a	66	4662	4	4	TSeries-101852021-1121-031	4p_500 pre Hm1a	4	500	21	1	0.338935
Scn1a	66	4662	4	4	TSeries-101852021-1121-031	4p_500 pre Hm1a	4	500	22	0
Scn1a	66	4662	4	4	TSeries-101852021-1121-031	4p_500 pre Hm1a	4	500	23	0
Scn1a	66	4662	4	4	TSeries-101852021-1121-031	4p_500 pre Hm1a	4	500	24	1	0.157915
Scn1a	66	4662	4	4	TSeries-101852021-1121-031	4p_500 pre Hm1a	4	500	25	0
Scn1a	66	4662	4	4	TSeries-101852021-1121-031	4p_500 pre Hm1a	4	500	26	0
Scn1a	66	4662	4	4	TSeries-101852021-1121-031	4p_500 pre Hm1a	4	500	27	1	0.146543
Scn1a	66	4662	4	4	TSeries-101852021-1121-031	4p_500 pre Hm1a	4	500	28	0
Scn1a	66	4662	4	4	TSeries-101852021-1121-031	4p_500 pre Hm1a	4	500	29	0
Scn1a	66	4662	4	4	TSeries-101852021-1121-031	4p_500 pre Hm1a	4	500	30	0
Scn1a	66	4662	4	4	TSeries-101852021-1121-031	4p_500 pre Hm1a	4	500	31	0
Scn1a	66	4662	4	4	TSeries-101852021-1121-031	4p_500 pre Hm1a	4	500	32	0
Scn1a	66	4662	4	4	TSeries-101852021-1121-031	4p_500 pre Hm1a	4	500	33	0
Scn1a	66	4662	4	4	TSeries-101852021-1121-031	4p_500 pre Hm1a	4	500	34	0
Scn1a	66	4662	4	4	TSeries-101852021-1121-031	4p_500 pre Hm1a	4	500	35	1	0.337816
Scn1a	66	4662	4	4	TSeries-101852021-1121-031	4p_500 pre Hm1a	4	500	36	1	0.590862
Scn1a	66	4662	4	4	TSeries-101852021-1121-031	4p_500 pre Hm1a	4	500	37	0
Scn1a	66	4662	4	4	TSeries-101852021-1121-031	4p_500 pre Hm1a	4	500	38	1	0.307111
Scn1a	66	4662	4	4	TSeries-101852021-1121-031	4p_500 pre Hm1a	4	500	39	0
Scn1a	66	4662	4	4	TSeries-101852021-1121-031	4p_500 pre Hm1a	4	500	40	1	0.517489
Scn1a	66	4662	4	4	TSeries-101852021-1121-031	4p_500 pre Hm1a	4	500	41	1	0.393204
Scn1a	66	4662	4	4	TSeries-101852021-1121-031	4p_500 pre Hm1a	4	500	42	1	0.353108
Scn1a	66	4662	4	4	TSeries-101852021-1121-031	4p_500 pre Hm1a	4	500	43	1	0.63657
Scn1a	66	4662	4	4	TSeries-101852021-1121-031	4p_500 pre Hm1a	4	500	44	0
Scn1a	66	4662	4	4	TSeries-101852021-1121-031	4p_500 pre Hm1a	4	500	45	0
Scn1a	66	4662	4	4	TSeries-101852021-1121-031	4p_500 pre Hm1a	4	500	46	0
Scn1a	66	4662	4	4	TSeries-101852021-1121-031	4p_500 pre Hm1a	4	500	47	0
Scn1a	66	4662	4	4	TSeries-101852021-1121-031	4p_500 pre Hm1a	4	500	48	1	0.488092
Scn1a	66	4662	4	4	TSeries-101852021-1121-031	4p_500 pre Hm1a	4	500	49	1	0.259646
Scn1a	66	4662	4	4	TSeries-101852021-1121-031	4p_500 pre Hm1a	4	500	50	0
Scn1a	66	4662	4	4	TSeries-101852021-1121-031	4p_500 pre Hm1a	4	500	51	1	0.370389
Scn1a	66	4662	4	4	TSeries-101852021-1121-031	4p_500 pre Hm1a	4	500	52	0
Scn1a	66	4662	4	4	TSeries-101852021-1121-031	4p_500 pre Hm1a	4	500	53	0
Scn1a	66	4662	4	4	TSeries-101852021-1121-031	4p_500 pre Hm1a	4	500	54	0
Scn1a	66	4662	4	4	TSeries-101852021-1121-031	4p_500 pre Hm1a	4	500	55	1	0.397299
Scn1a	66	4662	4	4	TSeries-101852021-1121-031	4p_500 pre Hm1a	4	500	56	1	0.441005
Scn1a	66	4662	4	4	TSeries-101852021-1121-031	4p_500 pre Hm1a	4	500	57	1	0.552745
Scn1a	66	4662	4	4	TSeries-101852021-1121-031	4p_500 pre Hm1a	4	500	58	0
Scn1a	66	4662	4	4	TSeries-101852021-1121-031	4p_500 pre Hm1a	4	500	59	1	0.591608
Scn1a	66	4662	4	4	TSeries-101852021-1121-031	4p_500 pre Hm1a	4	500	60	0
Scn1a	66	4662	4	4	TSeries-101852021-1121-031	4p_500 pre Hm1a	4	500	61	0
Scn1a	66	4662	4	4	TSeries-101852021-1121-036	4p_500 Hm1a	4	500	0	1	0.156363
Scn1a	66	4662	4	4	TSeries-101852021-1121-036	4p_500 Hm1a	4	500	1	1	0.301864
Scn1a	66	4662	4	4	TSeries-101852021-1121-036	4p_500 Hm1a	4	500	2	1	0.423185
Scn1a	66	4662	4	4	TSeries-101852021-1121-036	4p_500 Hm1a	4	500	3	1	0.352486
Scn1a	66	4662	4	4	TSeries-101852021-1121-036	4p_500 Hm1a	4	500	4	0
Scn1a	66	4662	4	4	TSeries-101852021-1121-036	4p_500 Hm1a	4	500	5	1	0.292503
Scn1a	66	4662	4	4	TSeries-101852021-1121-036	4p_500 Hm1a	4	500	6	1	0.407127
Scn1a	66	4662	4	4	TSeries-101852021-1121-036	4p_500 Hm1a	4	500	7	1	0.210335
Scn1a	66	4662	4	4	TSeries-101852021-1121-036	4p_500 Hm1a	4	500	8	1	0.496882
Scn1a	66	4662	4	4	TSeries-101852021-1121-036	4p_500 Hm1a	4	500	9	1	0.1914
Scn1a	66	4662	4	4	TSeries-101852021-1121-036	4p_500 Hm1a	4	500	10	1	0.269227
Scn1a	66	4662	4	4	TSeries-101852021-1121-036	4p_500 Hm1a	4	500	11	0
Scn1a	66	4662	4	4	TSeries-101852021-1121-036	4p_500 Hm1a	4	500	12	1	0.245052
Scn1a	66	4662	4	4	TSeries-101852021-1121-036	4p_500 Hm1a	4	500	13	1	0.367487
Scn1a	66	4662	4	4	TSeries-101852021-1121-036	4p_500 Hm1a	4	500	14	1	0.349333
Scn1a	66	4662	4	4	TSeries-101852021-1121-036	4p_500 Hm1a	4	500	15	1	0.363269
Scn1a	66	4662	4	4	TSeries-101852021-1121-036	4p_500 Hm1a	4	500	16	0
Scn1a	66	4662	4	4	TSeries-101852021-1121-036	4p_500 Hm1a	4	500	17	1	0.240902
Scn1a	66	4662	4	4	TSeries-101852021-1121-036	4p_500 Hm1a	4	500	18	0
Scn1a	66	4662	4	4	TSeries-101852021-1121-036	4p_500 Hm1a	4	500	19	0
Scn1a	66	4662	4	4	TSeries-101852021-1121-036	4p_500 Hm1a	4	500	20	1	0.3251
Scn1a	66	4662	4	4	TSeries-101852021-1121-036	4p_500 Hm1a	4	500	21	1	0.483069
Scn1a	66	4662	4	4	TSeries-101852021-1121-036	4p_500 Hm1a	4	500	22	1	0.215308
Scn1a	66	4662	4	4	TSeries-101852021-1121-036	4p_500 Hm1a	4	500	23	1	0.334326
Scn1a	66	4662	4	4	TSeries-101852021-1121-036	4p_500 Hm1a	4	500	24	1	0.186813
Scn1a	66	4662	4	4	TSeries-101852021-1121-036	4p_500 Hm1a	4	500	25	1	0.194709
Scn1a	66	4662	4	4	TSeries-101852021-1121-036	4p_500 Hm1a	4	500	26	0
Scn1a	66	4662	4	4	TSeries-101852021-1121-036	4p_500 Hm1a	4	500	27	1	0.176534
Scn1a	66	4662	4	4	TSeries-101852021-1121-036	4p_500 Hm1a	4	500	28	1	0.280794
Scn1a	66	4662	4	4	TSeries-101852021-1121-036	4p_500 Hm1a	4	500	29	1	0.216835
Scn1a	66	4662	4	4	TSeries-101852021-1121-036	4p_500 Hm1a	4	500	30	1	0.296071
Scn1a	66	4662	4	4	TSeries-101852021-1121-036	4p_500 Hm1a	4	500	31	0
Scn1a	66	4662	4	4	TSeries-101852021-1121-036	4p_500 Hm1a	4	500	32	1	0.174187
Scn1a	66	4662	4	4	TSeries-101852021-1121-036	4p_500 Hm1a	4	500	33	0
Scn1a	66	4662	4	4	TSeries-101852021-1121-036	4p_500 Hm1a	4	500	34	0
Scn1a	66	4662	4	4	TSeries-101852021-1121-036	4p_500 Hm1a	4	500	35	1	0.375116
Scn1a	66	4662	4	4	TSeries-101852021-1121-036	4p_500 Hm1a	4	500	36	1	0.605394
Scn1a	66	4662	4	4	TSeries-101852021-1121-036	4p_500 Hm1a	4	500	37	1	0.286966
Scn1a	66	4662	4	4	TSeries-101852021-1121-036	4p_500 Hm1a	4	500	38	1	0.397332
Scn1a	66	4662	4	4	TSeries-101852021-1121-036	4p_500 Hm1a	4	500	39	0
Scn1a	66	4662	4	4	TSeries-101852021-1121-036	4p_500 Hm1a	4	500	40	0
Scn1a	66	4662	4	4	TSeries-101852021-1121-036	4p_500 Hm1a	4	500	41	1	0.340529
Scn1a	66	4662	4	4	TSeries-101852021-1121-036	4p_500 Hm1a	4	500	42	1	0.366952
Scn1a	66	4662	4	4	TSeries-101852021-1121-036	4p_500 Hm1a	4	500	43	1	0.698127
Scn1a	66	4662	4	4	TSeries-101852021-1121-036	4p_500 Hm1a	4	500	44	0
Scn1a	66	4662	4	4	TSeries-101852021-1121-036	4p_500 Hm1a	4	500	45	0
Scn1a	66	4662	4	4	TSeries-101852021-1121-036	4p_500 Hm1a	4	500	46	1	0.289964
Scn1a	66	4662	4	4	TSeries-101852021-1121-036	4p_500 Hm1a	4	500	47	1	0.320981
Scn1a	66	4662	4	4	TSeries-101852021-1121-036	4p_500 Hm1a	4	500	48	1	0.633144
Scn1a	66	4662	4	4	TSeries-101852021-1121-036	4p_500 Hm1a	4	500	49	1	0.338059
Scn1a	66	4662	4	4	TSeries-101852021-1121-036	4p_500 Hm1a	4	500	50	1	0.232746
Scn1a	66	4662	4	4	TSeries-101852021-1121-036	4p_500 Hm1a	4	500	51	1	0.594637
Scn1a	66	4662	4	4	TSeries-101852021-1121-036	4p_500 Hm1a	4	500	52	1	0.216535
Scn1a	66	4662	4	4	TSeries-101852021-1121-036	4p_500 Hm1a	4	500	53	0
Scn1a	66	4662	4	4	TSeries-101852021-1121-036	4p_500 Hm1a	4	500	54	1	0.460604
Scn1a	66	4662	4	4	TSeries-101852021-1121-036	4p_500 Hm1a	4	500	55	1	0.306423
Scn1a	66	4662	4	4	TSeries-101852021-1121-036	4p_500 Hm1a	4	500	56	1	0.353346
Scn1a	66	4662	4	4	TSeries-101852021-1121-036	4p_500 Hm1a	4	500	57	0
Scn1a	66	4662	4	4	TSeries-101852021-1121-036	4p_500 Hm1a	4	500	58	1	0.738523
Scn1a	66	4662	4	4	TSeries-101852021-1121-036	4p_500 Hm1a	4	500	59	1	0.619661
Scn1a	66	4662	4	4	TSeries-101852021-1121-036	4p_500 Hm1a	4	500	60	0
Scn1a	66	4662	4	4	TSeries-101852021-1121-036	4p_500 Hm1a	4	500	61	0
Scn1a	66	4662	5	5	TSeries-101852021-1121-041	4p_500 pre Hm1a	4	500	0	1	0.128066
Scn1a	66	4662	5	5	TSeries-101852021-1121-041	4p_500 pre Hm1a	4	500	1	0
Scn1a	66	4662	5	5	TSeries-101852021-1121-041	4p_500 pre Hm1a	4	500	2	0
Scn1a	66	4662	5	5	TSeries-101852021-1121-041	4p_500 pre Hm1a	4	500	3	1	0.419732
Scn1a	66	4662	5	5	TSeries-101852021-1121-041	4p_500 pre Hm1a	4	500	4	1	0.386858
Scn1a	66	4662	5	5	TSeries-101852021-1121-041	4p_500 pre Hm1a	4	500	5	0
Scn1a	66	4662	5	5	TSeries-101852021-1121-041	4p_500 pre Hm1a	4	500	6	1	0.154426
Scn1a	66	4662	5	5	TSeries-101852021-1121-041	4p_500 pre Hm1a	4	500	7	0
Scn1a	66	4662	5	5	TSeries-101852021-1121-041	4p_500 pre Hm1a	4	500	8	0
Scn1a	66	4662	5	5	TSeries-101852021-1121-041	4p_500 pre Hm1a	4	500	9	0
Scn1a	66	4662	5	5	TSeries-101852021-1121-041	4p_500 pre Hm1a	4	500	10	1	0.197119
Scn1a	66	4662	5	5	TSeries-101852021-1121-041	4p_500 pre Hm1a	4	500	11	0
Scn1a	66	4662	5	5	TSeries-101852021-1121-041	4p_500 pre Hm1a	4	500	12	1	0.385421
Scn1a	66	4662	5	5	TSeries-101852021-1121-041	4p_500 pre Hm1a	4	500	13	1	0.453571
Scn1a	66	4662	5	5	TSeries-101852021-1121-041	4p_500 pre Hm1a	4	500	14	1	0.464703
Scn1a	66	4662	5	5	TSeries-101852021-1121-041	4p_500 pre Hm1a	4	500	15	1	0.343777
Scn1a	66	4662	5	5	TSeries-101852021-1121-041	4p_500 pre Hm1a	4	500	16	0
Scn1a	66	4662	5	5	TSeries-101852021-1121-041	4p_500 pre Hm1a	4	500	17	0
Scn1a	66	4662	5	5	TSeries-101852021-1121-041	4p_500 pre Hm1a	4	500	18	1	0.337901
Scn1a	66	4662	5	5	TSeries-101852021-1121-041	4p_500 pre Hm1a	4	500	19	1	0.251054
Scn1a	66	4662	5	5	TSeries-101852021-1121-041	4p_500 pre Hm1a	4	500	20	1	0.277851
Scn1a	66	4662	5	5	TSeries-101852021-1121-041	4p_500 pre Hm1a	4	500	21	1	0.40748
Scn1a	66	4662	5	5	TSeries-101852021-1121-041	4p_500 pre Hm1a	4	500	22	1	0.309522
Scn1a	66	4662	5	5	TSeries-101852021-1121-041	4p_500 pre Hm1a	4	500	23	0
Scn1a	66	4662	5	5	TSeries-101852021-1121-041	4p_500 pre Hm1a	4	500	24	0
Scn1a	66	4662	5	5	TSeries-101852021-1121-041	4p_500 pre Hm1a	4	500	25	1	0.183677
Scn1a	66	4662	5	5	TSeries-101852021-1121-041	4p_500 pre Hm1a	4	500	26	1	0.360233
Scn1a	66	4662	5	5	TSeries-101852021-1121-041	4p_500 pre Hm1a	4	500	27	1	0.206272
Scn1a	66	4662	5	5	TSeries-101852021-1121-041	4p_500 pre Hm1a	4	500	28	0
Scn1a	66	4662	5	5	TSeries-101852021-1121-041	4p_500 pre Hm1a	4	500	29	0
Scn1a	66	4662	5	5	TSeries-101852021-1121-041	4p_500 pre Hm1a	4	500	30	1	0.232696
Scn1a	66	4662	5	5	TSeries-101852021-1121-041	4p_500 pre Hm1a	4	500	31	1	0.884963
Scn1a	66	4662	5	5	TSeries-101852021-1121-041	4p_500 pre Hm1a	4	500	32	0
Scn1a	66	4662	5	5	TSeries-101852021-1121-041	4p_500 pre Hm1a	4	500	33	1	0.26414
Scn1a	66	4662	5	5	TSeries-101852021-1121-041	4p_500 pre Hm1a	4	500	34	1	0.269567
Scn1a	66	4662	5	5	TSeries-101852021-1121-041	4p_500 pre Hm1a	4	500	35	0
Scn1a	66	4662	5	5	TSeries-101852021-1121-041	4p_500 pre Hm1a	4	500	36	0
Scn1a	66	4662	5	5	TSeries-101852021-1121-041	4p_500 pre Hm1a	4	500	37	1	0.2127
Scn1a	66	4662	5	5	TSeries-101852021-1121-041	4p_500 pre Hm1a	4	500	38	1	0.615531
Scn1a	66	4662	5	5	TSeries-101852021-1121-041	4p_500 pre Hm1a	4	500	39	1	0.506551
Scn1a	66	4662	5	5	TSeries-101852021-1121-041	4p_500 pre Hm1a	4	500	40	1	0.352783
Scn1a	66	4662	5	5	TSeries-101852021-1121-041	4p_500 pre Hm1a	4	500	41	0
Scn1a	66	4662	5	5	TSeries-101852021-1121-041	4p_500 pre Hm1a	4	500	42	1	0.352867
Scn1a	66	4662	5	5	TSeries-101852021-1121-041	4p_500 pre Hm1a	4	500	43	1	0.173848
Scn1a	66	4662	5	5	TSeries-101852021-1121-041	4p_500 pre Hm1a	4	500	44	0
Scn1a	66	4662	5	5	TSeries-101852021-1121-041	4p_500 pre Hm1a	4	500	45	1	0.399559
Scn1a	66	4662	5	5	TSeries-101852021-1121-041	4p_500 pre Hm1a	4	500	46	0
Scn1a	66	4662	5	5	TSeries-101852021-1121-041	4p_500 pre Hm1a	4	500	47	0
Scn1a	66	4662	5	5	TSeries-101852021-1121-041	4p_500 pre Hm1a	4	500	48	1	0.590514
Scn1a	66	4662	5	5	TSeries-101852021-1121-041	4p_500 pre Hm1a	4	500	49	1	0.472204
Scn1a	66	4662	5	5	TSeries-101852021-1121-046	4p_500 Hm1a	4	500	0	1	0.181747
Scn1a	66	4662	5	5	TSeries-101852021-1121-046	4p_500 Hm1a	4	500	1	0
Scn1a	66	4662	5	5	TSeries-101852021-1121-046	4p_500 Hm1a	4	500	2	1	0.218132
Scn1a	66	4662	5	5	TSeries-101852021-1121-046	4p_500 Hm1a	4	500	3	1	0.2944
Scn1a	66	4662	5	5	TSeries-101852021-1121-046	4p_500 Hm1a	4	500	4	1	0.313638
Scn1a	66	4662	5	5	TSeries-101852021-1121-046	4p_500 Hm1a	4	500	5	1	0.112915
Scn1a	66	4662	5	5	TSeries-101852021-1121-046	4p_500 Hm1a	4	500	6	1	0.216033
Scn1a	66	4662	5	5	TSeries-101852021-1121-046	4p_500 Hm1a	4	500	7	1	0.144233
Scn1a	66	4662	5	5	TSeries-101852021-1121-046	4p_500 Hm1a	4	500	8	1	0.247103
Scn1a	66	4662	5	5	TSeries-101852021-1121-046	4p_500 Hm1a	4	500	9	1	0.280261
Scn1a	66	4662	5	5	TSeries-101852021-1121-046	4p_500 Hm1a	4	500	10	1	0.30089
Scn1a	66	4662	5	5	TSeries-101852021-1121-046	4p_500 Hm1a	4	500	11	1	0.18307
Scn1a	66	4662	5	5	TSeries-101852021-1121-046	4p_500 Hm1a	4	500	12	1	0.229892
Scn1a	66	4662	5	5	TSeries-101852021-1121-046	4p_500 Hm1a	4	500	13	1	0.338434
Scn1a	66	4662	5	5	TSeries-101852021-1121-046	4p_500 Hm1a	4	500	14	1	0.39605
Scn1a	66	4662	5	5	TSeries-101852021-1121-046	4p_500 Hm1a	4	500	15	1	0.345918
Scn1a	66	4662	5	5	TSeries-101852021-1121-046	4p_500 Hm1a	4	500	16	1	0.273437
Scn1a	66	4662	5	5	TSeries-101852021-1121-046	4p_500 Hm1a	4	500	17	1	0.33761
Scn1a	66	4662	5	5	TSeries-101852021-1121-046	4p_500 Hm1a	4	500	18	1	0.452207
Scn1a	66	4662	5	5	TSeries-101852021-1121-046	4p_500 Hm1a	4	500	19	1	0.248567
Scn1a	66	4662	5	5	TSeries-101852021-1121-046	4p_500 Hm1a	4	500	20	1	0.283
Scn1a	66	4662	5	5	TSeries-101852021-1121-046	4p_500 Hm1a	4	500	21	1	0.433921
Scn1a	66	4662	5	5	TSeries-101852021-1121-046	4p_500 Hm1a	4	500	22	1	0.253222
Scn1a	66	4662	5	5	TSeries-101852021-1121-046	4p_500 Hm1a	4	500	23	1	0.175375
Scn1a	66	4662	5	5	TSeries-101852021-1121-046	4p_500 Hm1a	4	500	24	1	0.18778
Scn1a	66	4662	5	5	TSeries-101852021-1121-046	4p_500 Hm1a	4	500	25	1	0.141515
Scn1a	66	4662	5	5	TSeries-101852021-1121-046	4p_500 Hm1a	4	500	26	1	0.253679
Scn1a	66	4662	5	5	TSeries-101852021-1121-046	4p_500 Hm1a	4	500	27	1	0.197799
Scn1a	66	4662	5	5	TSeries-101852021-1121-046	4p_500 Hm1a	4	500	28	1	0.133361
Scn1a	66	4662	5	5	TSeries-101852021-1121-046	4p_500 Hm1a	4	500	29	1	0.14016
Scn1a	66	4662	5	5	TSeries-101852021-1121-046	4p_500 Hm1a	4	500	30	1	0.144086
Scn1a	66	4662	5	5	TSeries-101852021-1121-046	4p_500 Hm1a	4	500	31	1	0.728041
Scn1a	66	4662	5	5	TSeries-101852021-1121-046	4p_500 Hm1a	4	500	32	1	0.277917
Scn1a	66	4662	5	5	TSeries-101852021-1121-046	4p_500 Hm1a	4	500	33	0
Scn1a	66	4662	5	5	TSeries-101852021-1121-046	4p_500 Hm1a	4	500	34	1	0.37297
Scn1a	66	4662	5	5	TSeries-101852021-1121-046	4p_500 Hm1a	4	500	35	0
Scn1a	66	4662	5	5	TSeries-101852021-1121-046	4p_500 Hm1a	4	500	36	1	0.196281
Scn1a	66	4662	5	5	TSeries-101852021-1121-046	4p_500 Hm1a	4	500	37	1	0.110363
Scn1a	66	4662	5	5	TSeries-101852021-1121-046	4p_500 Hm1a	4	500	38	1	0.388689
Scn1a	66	4662	5	5	TSeries-101852021-1121-046	4p_500 Hm1a	4	500	39	1	0.377015
Scn1a	66	4662	5	5	TSeries-101852021-1121-046	4p_500 Hm1a	4	500	40	1	0.182426
Scn1a	66	4662	5	5	TSeries-101852021-1121-046	4p_500 Hm1a	4	500	41	1	0.178019
Scn1a	66	4662	5	5	TSeries-101852021-1121-046	4p_500 Hm1a	4	500	42	1	0.210287
Scn1a	66	4662	5	5	TSeries-101852021-1121-046	4p_500 Hm1a	4	500	43	1	0.287759
Scn1a	66	4662	5	5	TSeries-101852021-1121-046	4p_500 Hm1a	4	500	44	1	0.251052
Scn1a	66	4662	5	5	TSeries-101852021-1121-046	4p_500 Hm1a	4	500	45	1	0.239066
Scn1a	66	4662	5	5	TSeries-101852021-1121-046	4p_500 Hm1a	4	500	46	0
Scn1a	66	4662	5	5	TSeries-101852021-1121-046	4p_500 Hm1a	4	500	47	1	0.146488
Scn1a	66	4662	5	5	TSeries-101852021-1121-046	4p_500 Hm1a	4	500	48	1	0.393903
Scn1a	66	4662	5	5	TSeries-101852021-1121-046	4p_500 Hm1a	4	500	49	1	0.609578
Scn1a	68	4667	1	1	TSeries-10202021-1441-021	4p_500 pre Hm1a	4	500	0	1	1.69706
Scn1a	68	4667	1	1	TSeries-10202021-1441-021	4p_500 pre Hm1a	4	500	1	1	0.931951
Scn1a	68	4667	1	1	TSeries-10202021-1441-021	4p_500 pre Hm1a	4	500	2	1	0.848681
Scn1a	68	4667	1	1	TSeries-10202021-1441-021	4p_500 pre Hm1a	4	500	3	1	1.09958
Scn1a	68	4667	1	1	TSeries-10202021-1441-021	4p_500 pre Hm1a	4	500	4	1	1.07487
Scn1a	68	4667	1	1	TSeries-10202021-1441-021	4p_500 pre Hm1a	4	500	5	1	1.40877
Scn1a	68	4667	1	1	TSeries-10202021-1441-021	4p_500 pre Hm1a	4	500	6	1	1.59558
Scn1a	68	4667	1	1	TSeries-10202021-1441-021	4p_500 pre Hm1a	4	500	7	1	0.97734
Scn1a	68	4667	1	1	TSeries-10202021-1441-021	4p_500 pre Hm1a	4	500	8	1	1.27262
Scn1a	68	4667	1	1	TSeries-10202021-1441-021	4p_500 pre Hm1a	4	500	9	1	1.3999
Scn1a	68	4667	1	1	TSeries-10202021-1441-021	4p_500 pre Hm1a	4	500	10	1	1.0379
Scn1a	68	4667	1	1	TSeries-10202021-1441-021	4p_500 pre Hm1a	4	500	11	1	1.48765
Scn1a	68	4667	1	1	TSeries-10202021-1441-021	4p_500 pre Hm1a	4	500	12	1	1.31386
Scn1a	68	4667	1	1	TSeries-10202021-1441-021	4p_500 pre Hm1a	4	500	13	1	1.53224
Scn1a	68	4667	1	1	TSeries-10202021-1441-021	4p_500 pre Hm1a	4	500	14	1	1.19278
Scn1a	68	4667	1	1	TSeries-10202021-1441-021	4p_500 pre Hm1a	4	500	15	1	1.04552
Scn1a	68	4667	1	1	TSeries-10202021-1441-021	4p_500 pre Hm1a	4	500	16	1	1.09553
Scn1a	68	4667	1	1	TSeries-10202021-1441-021	4p_500 pre Hm1a	4	500	17	1	1.78627
Scn1a	68	4667	1	1	TSeries-10202021-1441-021	4p_500 pre Hm1a	4	500	18	1	1.15918
Scn1a	68	4667	1	1	TSeries-10202021-1441-021	4p_500 pre Hm1a	4	500	19	1	1.51071
Scn1a	68	4667	1	1	TSeries-10202021-1441-021	4p_500 pre Hm1a	4	500	20	1	1.47639
Scn1a	68	4667	1	1	TSeries-10202021-1441-021	4p_500 pre Hm1a	4	500	21	1	1.20404
Scn1a	68	4667	1	1	TSeries-10202021-1441-021	4p_500 pre Hm1a	4	500	22	1	1.34179
Scn1a	68	4667	1	1	TSeries-10202021-1441-021	4p_500 pre Hm1a	4	500	23	1	1.22404
Scn1a	68	4667	1	1	TSeries-10202021-1441-021	4p_500 pre Hm1a	4	500	24	1	1.48998
Scn1a	68	4667	1	1	TSeries-10202021-1441-021	4p_500 pre Hm1a	4	500	25	1	1.14054
Scn1a	68	4667	1	1	TSeries-10202021-1441-021	4p_500 pre Hm1a	4	500	26	1	1.33568
Scn1a	68	4667	1	1	TSeries-10202021-1441-021	4p_500 pre Hm1a	4	500	27	1	1.54531
Scn1a	68	4667	1	1	TSeries-10202021-1441-021	4p_500 pre Hm1a	4	500	28	1	1.02338
Scn1a	68	4667	1	1	TSeries-10202021-1441-021	4p_500 pre Hm1a	4	500	29	1	1.07769
Scn1a	68	4667	1	1	TSeries-10202021-1441-021	4p_500 pre Hm1a	4	500	30	1	1.16977
Scn1a	68	4667	1	1	TSeries-10202021-1441-021	4p_500 pre Hm1a	4	500	31	1	1.43
Scn1a	68	4667	1	1	TSeries-10202021-1441-021	4p_500 pre Hm1a	4	500	32	1	1.10958
Scn1a	68	4667	1	1	TSeries-10202021-1441-021	4p_500 pre Hm1a	4	500	33	1	1.29028
Scn1a	68	4667	1	1	TSeries-10202021-1441-021	4p_500 pre Hm1a	4	500	34	1	1.41038
Scn1a	68	4667	1	1	TSeries-10202021-1441-021	4p_500 pre Hm1a	4	500	35	1	1.32754
Scn1a	68	4667	1	1	TSeries-10202021-1441-021	4p_500 pre Hm1a	4	500	36	1	0.664044
Scn1a	68	4667	1	1	TSeries-10202021-1441-021	4p_500 pre Hm1a	4	500	37	1	0.464135
Scn1a	68	4667	1	1	TSeries-10202021-1441-021	4p_500 pre Hm1a	4	500	38	1	0.174269
Scn1a	68	4667	1	1	TSeries-10202021-1441-021	4p_500 pre Hm1a	4	500	39	1	1.03764
Scn1a	68	4667	1	1	TSeries-10202021-1441-021	4p_500 pre Hm1a	4	500	40	1	1.20745
Scn1a	68	4667	1	1	TSeries-10202021-1441-021	4p_500 pre Hm1a	4	500	41	1	1.13969
Scn1a	68	4667	1	1	TSeries-10202021-1441-021	4p_500 pre Hm1a	4	500	42	1	1.1408
Scn1a	68	4667	1	1	TSeries-10202021-1441-021	4p_500 pre Hm1a	4	500	43	1	0.591477
Scn1a	68	4667	1	1	TSeries-10202021-1441-021	4p_500 pre Hm1a	4	500	44	1	0.832691
Scn1a	68	4667	1	1	TSeries-10202021-1441-021	4p_500 pre Hm1a	4	500	45	1	0.679389
Scn1a	68	4667	1	1	TSeries-10202021-1441-021	4p_500 pre Hm1a	4	500	46	1	1.01856
Scn1a	68	4667	1	1	TSeries-10202021-1441-021	4p_500 pre Hm1a	4	500	47	1	0.814227
Scn1a	68	4667	1	1	TSeries-10202021-1441-021	4p_500 pre Hm1a	4	500	48	1	1.01489
Scn1a	68	4667	1	1	TSeries-10202021-1441-021	4p_500 pre Hm1a	4	500	49	1	1.25404
Scn1a	68	4667	1	1	TSeries-10202021-1441-021	4p_500 pre Hm1a	4	500	50	1	1.00541
Scn1a	68	4667	1	1	TSeries-10202021-1441-021	4p_500 pre Hm1a	4	500	51	1	0.79306
Scn1a	68	4667	1	1	TSeries-10202021-1441-021	4p_500 pre Hm1a	4	500	52	1	0.845663
Scn1a	68	4667	1	1	TSeries-10202021-1441-021	4p_500 pre Hm1a	4	500	53	1	1.21428
Scn1a	68	4667	1	1	TSeries-10202021-1441-021	4p_500 pre Hm1a	4	500	54	1	1.44959
Scn1a	68	4667	1	1	TSeries-10202021-1441-021	4p_500 pre Hm1a	4	500	55	1	1.77792
Scn1a	68	4667	1	1	TSeries-10202021-1441-021	4p_500 pre Hm1a	4	500	56	1	0.967702
Scn1a	68	4667	1	1	TSeries-10202021-1441-021	4p_500 pre Hm1a	4	500	57	1	1.12698
Scn1a	68	4667	1	1	TSeries-10202021-1441-021	4p_500 pre Hm1a	4	500	58	1	0.824807
Scn1a	68	4667	1	1	TSeries-10202021-1441-021	4p_500 pre Hm1a	4	500	59	1	1.45051
Scn1a	68	4667	1	1	TSeries-10202021-1441-021	4p_500 pre Hm1a	4	500	60	1	1.47948
Scn1a	68	4667	1	1	TSeries-10202021-1441-021	4p_500 pre Hm1a	4	500	61	1	1.04779
Scn1a	68	4667	1	1	TSeries-10202021-1441-026	4p_500 Hm1a	4	500	0	1	1.75806
Scn1a	68	4667	1	1	TSeries-10202021-1441-026	4p_500 Hm1a	4	500	1	1	0.713895
Scn1a	68	4667	1	1	TSeries-10202021-1441-026	4p_500 Hm1a	4	500	2	1	0.6005
Scn1a	68	4667	1	1	TSeries-10202021-1441-026	4p_500 Hm1a	4	500	3	1	1.1228
Scn1a	68	4667	1	1	TSeries-10202021-1441-026	4p_500 Hm1a	4	500	4	1	0.968479
Scn1a	68	4667	1	1	TSeries-10202021-1441-026	4p_500 Hm1a	4	500	5	1	1.20369
Scn1a	68	4667	1	1	TSeries-10202021-1441-026	4p_500 Hm1a	4	500	6	1	1.70367
Scn1a	68	4667	1	1	TSeries-10202021-1441-026	4p_500 Hm1a	4	500	7	1	0.932257
Scn1a	68	4667	1	1	TSeries-10202021-1441-026	4p_500 Hm1a	4	500	8	1	1.50245
Scn1a	68	4667	1	1	TSeries-10202021-1441-026	4p_500 Hm1a	4	500	9	1	1.65637
Scn1a	68	4667	1	1	TSeries-10202021-1441-026	4p_500 Hm1a	4	500	10	1	1.02434
Scn1a	68	4667	1	1	TSeries-10202021-1441-026	4p_500 Hm1a	4	500	11	1	1.40322
Scn1a	68	4667	1	1	TSeries-10202021-1441-026	4p_500 Hm1a	4	500	12	1	1.26168
Scn1a	68	4667	1	1	TSeries-10202021-1441-026	4p_500 Hm1a	4	500	13	1	1.51231
Scn1a	68	4667	1	1	TSeries-10202021-1441-026	4p_500 Hm1a	4	500	14	1	1.16073
Scn1a	68	4667	1	1	TSeries-10202021-1441-026	4p_500 Hm1a	4	500	15	1	1.09982
Scn1a	68	4667	1	1	TSeries-10202021-1441-026	4p_500 Hm1a	4	500	16	1	1.04416
Scn1a	68	4667	1	1	TSeries-10202021-1441-026	4p_500 Hm1a	4	500	17	1	1.39886
Scn1a	68	4667	1	1	TSeries-10202021-1441-026	4p_500 Hm1a	4	500	18	1	1.62771
Scn1a	68	4667	1	1	TSeries-10202021-1441-026	4p_500 Hm1a	4	500	19	1	1.61021
Scn1a	68	4667	1	1	TSeries-10202021-1441-026	4p_500 Hm1a	4	500	20	1	1.65934
Scn1a	68	4667	1	1	TSeries-10202021-1441-026	4p_500 Hm1a	4	500	21	1	1.28649
Scn1a	68	4667	1	1	TSeries-10202021-1441-026	4p_500 Hm1a	4	500	22	1	1.10739
Scn1a	68	4667	1	1	TSeries-10202021-1441-026	4p_500 Hm1a	4	500	23	1	1.30975
Scn1a	68	4667	1	1	TSeries-10202021-1441-026	4p_500 Hm1a	4	500	24	1	1.39158
Scn1a	68	4667	1	1	TSeries-10202021-1441-026	4p_500 Hm1a	4	500	25	1	0.971257
Scn1a	68	4667	1	1	TSeries-10202021-1441-026	4p_500 Hm1a	4	500	26	1	1.05765
Scn1a	68	4667	1	1	TSeries-10202021-1441-026	4p_500 Hm1a	4	500	27	1	1.89653
Scn1a	68	4667	1	1	TSeries-10202021-1441-026	4p_500 Hm1a	4	500	28	1	1.09034
Scn1a	68	4667	1	1	TSeries-10202021-1441-026	4p_500 Hm1a	4	500	29	1	0.940895
Scn1a	68	4667	1	1	TSeries-10202021-1441-026	4p_500 Hm1a	4	500	30	1	1.09303
Scn1a	68	4667	1	1	TSeries-10202021-1441-026	4p_500 Hm1a	4	500	31	1	1.48259
Scn1a	68	4667	1	1	TSeries-10202021-1441-026	4p_500 Hm1a	4	500	32	1	0.986059
Scn1a	68	4667	1	1	TSeries-10202021-1441-026	4p_500 Hm1a	4	500	33	1	0.968326
Scn1a	68	4667	1	1	TSeries-10202021-1441-026	4p_500 Hm1a	4	500	34	1	1.36562
Scn1a	68	4667	1	1	TSeries-10202021-1441-026	4p_500 Hm1a	4	500	35	1	1.21073
Scn1a	68	4667	1	1	TSeries-10202021-1441-026	4p_500 Hm1a	4	500	36	1	0.490674
Scn1a	68	4667	1	1	TSeries-10202021-1441-026	4p_500 Hm1a	4	500	37	1	0.262711
Scn1a	68	4667	1	1	TSeries-10202021-1441-026	4p_500 Hm1a	4	500	38	0
Scn1a	68	4667	1	1	TSeries-10202021-1441-026	4p_500 Hm1a	4	500	39	1	0.912539
Scn1a	68	4667	1	1	TSeries-10202021-1441-026	4p_500 Hm1a	4	500	40	1	1.20877
Scn1a	68	4667	1	1	TSeries-10202021-1441-026	4p_500 Hm1a	4	500	41	1	0.971102
Scn1a	68	4667	1	1	TSeries-10202021-1441-026	4p_500 Hm1a	4	500	42	1	0.296533
Scn1a	68	4667	1	1	TSeries-10202021-1441-026	4p_500 Hm1a	4	500	43	1	0.557051
Scn1a	68	4667	1	1	TSeries-10202021-1441-026	4p_500 Hm1a	4	500	44	1	0.537396
Scn1a	68	4667	1	1	TSeries-10202021-1441-026	4p_500 Hm1a	4	500	45	1	0.457803
Scn1a	68	4667	1	1	TSeries-10202021-1441-026	4p_500 Hm1a	4	500	46	1	1.09083
Scn1a	68	4667	1	1	TSeries-10202021-1441-026	4p_500 Hm1a	4	500	47	1	0.672741
Scn1a	68	4667	1	1	TSeries-10202021-1441-026	4p_500 Hm1a	4	500	48	1	0.776164
Scn1a	68	4667	1	1	TSeries-10202021-1441-026	4p_500 Hm1a	4	500	49	1	1.03946
Scn1a	68	4667	1	1	TSeries-10202021-1441-026	4p_500 Hm1a	4	500	50	1	0.912926
Scn1a	68	4667	1	1	TSeries-10202021-1441-026	4p_500 Hm1a	4	500	51	1	0.935652
Scn1a	68	4667	1	1	TSeries-10202021-1441-026	4p_500 Hm1a	4	500	52	1	0.626979
Scn1a	68	4667	1	1	TSeries-10202021-1441-026	4p_500 Hm1a	4	500	53	1	1.09457
Scn1a	68	4667	1	1	TSeries-10202021-1441-026	4p_500 Hm1a	4	500	54	1	1.45465
Scn1a	68	4667	1	1	TSeries-10202021-1441-026	4p_500 Hm1a	4	500	55	1	1.44188
Scn1a	68	4667	1	1	TSeries-10202021-1441-026	4p_500 Hm1a	4	500	56	1	0.978876
Scn1a	68	4667	1	1	TSeries-10202021-1441-026	4p_500 Hm1a	4	500	57	1	0.98273
Scn1a	68	4667	1	1	TSeries-10202021-1441-026	4p_500 Hm1a	4	500	58	1	1.04199
Scn1a	68	4667	1	1	TSeries-10202021-1441-026	4p_500 Hm1a	4	500	59	1	0.744595
Scn1a	68	4667	1	1	TSeries-10202021-1441-026	4p_500 Hm1a	4	500	60	1	1.58537
Scn1a	68	4667	1	1	TSeries-10202021-1441-026	4p_500 Hm1a	4	500	61	1	1.0827
Scn1a	68	4667	2	2	TSeries-10202021-1441-031	4p_500 pre Hm1a	4	500	0	1	0.093199
Scn1a	68	4667	2	2	TSeries-10202021-1441-031	4p_500 pre Hm1a	4	500	1	1	0.268446
Scn1a	68	4667	2	2	TSeries-10202021-1441-031	4p_500 pre Hm1a	4	500	2	1	0.171214
Scn1a	68	4667	2	2	TSeries-10202021-1441-031	4p_500 pre Hm1a	4	500	3	1	0.269639
Scn1a	68	4667	2	2	TSeries-10202021-1441-031	4p_500 pre Hm1a	4	500	4	1	0.355768
Scn1a	68	4667	2	2	TSeries-10202021-1441-031	4p_500 pre Hm1a	4	500	5	1	0.324775
Scn1a	68	4667	2	2	TSeries-10202021-1441-031	4p_500 pre Hm1a	4	500	6	1	0.447431
Scn1a	68	4667	2	2	TSeries-10202021-1441-031	4p_500 pre Hm1a	4	500	7	1	0.512124
Scn1a	68	4667	2	2	TSeries-10202021-1441-031	4p_500 pre Hm1a	4	500	8	1	0.367333
Scn1a	68	4667	2	2	TSeries-10202021-1441-031	4p_500 pre Hm1a	4	500	9	1	0.359569
Scn1a	68	4667	2	2	TSeries-10202021-1441-031	4p_500 pre Hm1a	4	500	10	1	0.355503
Scn1a	68	4667	2	2	TSeries-10202021-1441-031	4p_500 pre Hm1a	4	500	11	1	0.354546
Scn1a	68	4667	2	2	TSeries-10202021-1441-031	4p_500 pre Hm1a	4	500	12	1	0.394265
Scn1a	68	4667	2	2	TSeries-10202021-1441-031	4p_500 pre Hm1a	4	500	13	1	0.28536
Scn1a	68	4667	2	2	TSeries-10202021-1441-031	4p_500 pre Hm1a	4	500	14	1	0.423859
Scn1a	68	4667	2	2	TSeries-10202021-1441-031	4p_500 pre Hm1a	4	500	15	1	0.441324
Scn1a	68	4667	2	2	TSeries-10202021-1441-031	4p_500 pre Hm1a	4	500	16	1	0.416779
Scn1a	68	4667	2	2	TSeries-10202021-1441-031	4p_500 pre Hm1a	4	500	17	1	0.53916
Scn1a	68	4667	2	2	TSeries-10202021-1441-031	4p_500 pre Hm1a	4	500	18	1	0.665864
Scn1a	68	4667	2	2	TSeries-10202021-1441-031	4p_500 pre Hm1a	4	500	19	1	0.561069
Scn1a	68	4667	2	2	TSeries-10202021-1441-031	4p_500 pre Hm1a	4	500	20	1	0.420861
Scn1a	68	4667	2	2	TSeries-10202021-1441-031	4p_500 pre Hm1a	4	500	21	1	0.37575
Scn1a	68	4667	2	2	TSeries-10202021-1441-031	4p_500 pre Hm1a	4	500	22	1	0.569571
Scn1a	68	4667	2	2	TSeries-10202021-1441-031	4p_500 pre Hm1a	4	500	23	1	0.372756
Scn1a	68	4667	2	2	TSeries-10202021-1441-031	4p_500 pre Hm1a	4	500	24	1	0.376069
Scn1a	68	4667	2	2	TSeries-10202021-1441-031	4p_500 pre Hm1a	4	500	25	1	0.379049
Scn1a	68	4667	2	2	TSeries-10202021-1441-031	4p_500 pre Hm1a	4	500	26	1	0.417148
Scn1a	68	4667	2	2	TSeries-10202021-1441-031	4p_500 pre Hm1a	4	500	27	1	0.379349
Scn1a	68	4667	2	2	TSeries-10202021-1441-031	4p_500 pre Hm1a	4	500	28	1	0.24756
Scn1a	68	4667	2	2	TSeries-10202021-1441-031	4p_500 pre Hm1a	4	500	29	1	0.317296
Scn1a	68	4667	2	2	TSeries-10202021-1441-031	4p_500 pre Hm1a	4	500	30	1	0.275076
Scn1a	68	4667	2	2	TSeries-10202021-1441-031	4p_500 pre Hm1a	4	500	31	1	0.266124
Scn1a	68	4667	2	2	TSeries-10202021-1441-031	4p_500 pre Hm1a	4	500	32	1	0.113724
Scn1a	68	4667	2	2	TSeries-10202021-1441-031	4p_500 pre Hm1a	4	500	33	1	0.212096
Scn1a	68	4667	2	2	TSeries-10202021-1441-031	4p_500 pre Hm1a	4	500	34	1	0.28269
Scn1a	68	4667	2	2	TSeries-10202021-1441-031	4p_500 pre Hm1a	4	500	35	1	0.398497
Scn1a	68	4667	2	2	TSeries-10202021-1441-031	4p_500 pre Hm1a	4	500	36	1	0.504396
Scn1a	68	4667	2	2	TSeries-10202021-1441-031	4p_500 pre Hm1a	4	500	37	1	0.316632
Scn1a	68	4667	2	2	TSeries-10202021-1441-031	4p_500 pre Hm1a	4	500	38	1	0.230137
Scn1a	68	4667	2	2	TSeries-10202021-1441-031	4p_500 pre Hm1a	4	500	39	1	0.358064
Scn1a	68	4667	2	2	TSeries-10202021-1441-031	4p_500 pre Hm1a	4	500	40	1	0.190166
Scn1a	68	4667	2	2	TSeries-10202021-1441-031	4p_500 pre Hm1a	4	500	41	1	0.370009
Scn1a	68	4667	2	2	TSeries-10202021-1441-031	4p_500 pre Hm1a	4	500	42	1	0.215437
Scn1a	68	4667	2	2	TSeries-10202021-1441-031	4p_500 pre Hm1a	4	500	43	1	0.192398
Scn1a	68	4667	2	2	TSeries-10202021-1441-031	4p_500 pre Hm1a	4	500	44	1	0.33442
Scn1a	68	4667	2	2	TSeries-10202021-1441-031	4p_500 pre Hm1a	4	500	45	1	0.325756
Scn1a	68	4667	2	2	TSeries-10202021-1441-031	4p_500 pre Hm1a	4	500	46	1	0.490518
Scn1a	68	4667	2	2	TSeries-10202021-1441-036	4p_500 Hm1a	4	500	0	1	0.116725
Scn1a	68	4667	2	2	TSeries-10202021-1441-036	4p_500 Hm1a	4	500	1	1	0.320731
Scn1a	68	4667	2	2	TSeries-10202021-1441-036	4p_500 Hm1a	4	500	2	1	0.173752
Scn1a	68	4667	2	2	TSeries-10202021-1441-036	4p_500 Hm1a	4	500	3	1	0.166717
Scn1a	68	4667	2	2	TSeries-10202021-1441-036	4p_500 Hm1a	4	500	4	1	0.236182
Scn1a	68	4667	2	2	TSeries-10202021-1441-036	4p_500 Hm1a	4	500	5	1	0.185307
Scn1a	68	4667	2	2	TSeries-10202021-1441-036	4p_500 Hm1a	4	500	6	1	0.302101
Scn1a	68	4667	2	2	TSeries-10202021-1441-036	4p_500 Hm1a	4	500	7	1	0.3407
Scn1a	68	4667	2	2	TSeries-10202021-1441-036	4p_500 Hm1a	4	500	8	1	0.276101
Scn1a	68	4667	2	2	TSeries-10202021-1441-036	4p_500 Hm1a	4	500	9	1	0.287292
Scn1a	68	4667	2	2	TSeries-10202021-1441-036	4p_500 Hm1a	4	500	10	1	0.314984
Scn1a	68	4667	2	2	TSeries-10202021-1441-036	4p_500 Hm1a	4	500	11	0
Scn1a	68	4667	2	2	TSeries-10202021-1441-036	4p_500 Hm1a	4	500	12	1	0.315547
Scn1a	68	4667	2	2	TSeries-10202021-1441-036	4p_500 Hm1a	4	500	13	1	0.279571
Scn1a	68	4667	2	2	TSeries-10202021-1441-036	4p_500 Hm1a	4	500	14	1	0.407458
Scn1a	68	4667	2	2	TSeries-10202021-1441-036	4p_500 Hm1a	4	500	15	1	0.431127
Scn1a	68	4667	2	2	TSeries-10202021-1441-036	4p_500 Hm1a	4	500	16	1	0.433479
Scn1a	68	4667	2	2	TSeries-10202021-1441-036	4p_500 Hm1a	4	500	17	1	0.492257
Scn1a	68	4667	2	2	TSeries-10202021-1441-036	4p_500 Hm1a	4	500	18	1	0.722989
Scn1a	68	4667	2	2	TSeries-10202021-1441-036	4p_500 Hm1a	4	500	19	1	0.599852
Scn1a	68	4667	2	2	TSeries-10202021-1441-036	4p_500 Hm1a	4	500	20	1	0.457103
Scn1a	68	4667	2	2	TSeries-10202021-1441-036	4p_500 Hm1a	4	500	21	1	0.493932
Scn1a	68	4667	2	2	TSeries-10202021-1441-036	4p_500 Hm1a	4	500	22	1	0.582839
Scn1a	68	4667	2	2	TSeries-10202021-1441-036	4p_500 Hm1a	4	500	23	1	0.380378
Scn1a	68	4667	2	2	TSeries-10202021-1441-036	4p_500 Hm1a	4	500	24	1	0.410808
Scn1a	68	4667	2	2	TSeries-10202021-1441-036	4p_500 Hm1a	4	500	25	1	0.509683
Scn1a	68	4667	2	2	TSeries-10202021-1441-036	4p_500 Hm1a	4	500	26	1	0.44542
Scn1a	68	4667	2	2	TSeries-10202021-1441-036	4p_500 Hm1a	4	500	27	1	0.348829
Scn1a	68	4667	2	2	TSeries-10202021-1441-036	4p_500 Hm1a	4	500	28	1	0.256681
Scn1a	68	4667	2	2	TSeries-10202021-1441-036	4p_500 Hm1a	4	500	29	1	0.320828
Scn1a	68	4667	2	2	TSeries-10202021-1441-036	4p_500 Hm1a	4	500	30	1	0.356915
Scn1a	68	4667	2	2	TSeries-10202021-1441-036	4p_500 Hm1a	4	500	31	1	0.481326
Scn1a	68	4667	2	2	TSeries-10202021-1441-036	4p_500 Hm1a	4	500	32	0
Scn1a	68	4667	2	2	TSeries-10202021-1441-036	4p_500 Hm1a	4	500	33	1	0.409459
Scn1a	68	4667	2	2	TSeries-10202021-1441-036	4p_500 Hm1a	4	500	34	1	0.37884
Scn1a	68	4667	2	2	TSeries-10202021-1441-036	4p_500 Hm1a	4	500	35	1	0.506835
Scn1a	68	4667	2	2	TSeries-10202021-1441-036	4p_500 Hm1a	4	500	36	1	0.471346
Scn1a	68	4667	2	2	TSeries-10202021-1441-036	4p_500 Hm1a	4	500	37	1	0.33474
Scn1a	68	4667	2	2	TSeries-10202021-1441-036	4p_500 Hm1a	4	500	38	1	0.538785
Scn1a	68	4667	2	2	TSeries-10202021-1441-036	4p_500 Hm1a	4	500	39	1	0.563891
Scn1a	68	4667	2	2	TSeries-10202021-1441-036	4p_500 Hm1a	4	500	40	1	0.322393
Scn1a	68	4667	2	2	TSeries-10202021-1441-036	4p_500 Hm1a	4	500	41	1	0.380353
Scn1a	68	4667	2	2	TSeries-10202021-1441-036	4p_500 Hm1a	4	500	42	1	0.24003
Scn1a	68	4667	2	2	TSeries-10202021-1441-036	4p_500 Hm1a	4	500	43	1	0.249251
Scn1a	68	4667	2	2	TSeries-10202021-1441-036	4p_500 Hm1a	4	500	44	1	0.384394
Scn1a	68	4667	2	2	TSeries-10202021-1441-036	4p_500 Hm1a	4	500	45	1	0.311542
Scn1a	68	4667	2	2	TSeries-10202021-1441-036	4p_500 Hm1a	4	500	46	1	0.331565
WT	67	4663	1	1	TSeries-101952021-0947-001	4p_500 pre Hm1a	4	500	0	1	0.300678
WT	67	4663	1	1	TSeries-101952021-0947-001	4p_500 pre Hm1a	4	500	1	0
WT	67	4663	1	1	TSeries-101952021-0947-001	4p_500 pre Hm1a	4	500	2	0
WT	67	4663	1	1	TSeries-101952021-0947-001	4p_500 pre Hm1a	4	500	3	1	0.271946
WT	67	4663	1	1	TSeries-101952021-0947-001	4p_500 pre Hm1a	4	500	4	0
WT	67	4663	1	1	TSeries-101952021-0947-001	4p_500 pre Hm1a	4	500	5	0
WT	67	4663	1	1	TSeries-101952021-0947-001	4p_500 pre Hm1a	4	500	6	0
WT	67	4663	1	1	TSeries-101952021-0947-001	4p_500 pre Hm1a	4	500	7	0
WT	67	4663	1	1	TSeries-101952021-0947-001	4p_500 pre Hm1a	4	500	8	0
WT	67	4663	1	1	TSeries-101952021-0947-001	4p_500 pre Hm1a	4	500	9	0
WT	67	4663	1	1	TSeries-101952021-0947-001	4p_500 pre Hm1a	4	500	10	0
WT	67	4663	1	1	TSeries-101952021-0947-001	4p_500 pre Hm1a	4	500	11	0
WT	67	4663	1	1	TSeries-101952021-0947-001	4p_500 pre Hm1a	4	500	12	0
WT	67	4663	1	1	TSeries-101952021-0947-001	4p_500 pre Hm1a	4	500	13	0
WT	67	4663	1	1	TSeries-101952021-0947-001	4p_500 pre Hm1a	4	500	14	0
WT	67	4663	1	1	TSeries-101952021-0947-001	4p_500 pre Hm1a	4	500	15	0
WT	67	4663	1	1	TSeries-101952021-0947-001	4p_500 pre Hm1a	4	500	16	0
WT	67	4663	1	1	TSeries-101952021-0947-001	4p_500 pre Hm1a	4	500	17	0
WT	67	4663	1	1	TSeries-101952021-0947-001	4p_500 pre Hm1a	4	500	18	0
WT	67	4663	1	1	TSeries-101952021-0947-001	4p_500 pre Hm1a	4	500	19	0
WT	67	4663	1	1	TSeries-101952021-0947-001	4p_500 pre Hm1a	4	500	20	1	0.186444
WT	67	4663	1	1	TSeries-101952021-0947-001	4p_500 pre Hm1a	4	500	21	0
WT	67	4663	1	1	TSeries-101952021-0947-001	4p_500 pre Hm1a	4	500	22	0
WT	67	4663	1	1	TSeries-101952021-0947-001	4p_500 pre Hm1a	4	500	23	0
WT	67	4663	1	1	TSeries-101952021-0947-001	4p_500 pre Hm1a	4	500	24	0
WT	67	4663	1	1	TSeries-101952021-0947-001	4p_500 pre Hm1a	4	500	25	0
WT	67	4663	1	1	TSeries-101952021-0947-001	4p_500 pre Hm1a	4	500	26	0
WT	67	4663	1	1	TSeries-101952021-0947-001	4p_500 pre Hm1a	4	500	27	0
WT	67	4663	1	1	TSeries-101952021-0947-001	4p_500 pre Hm1a	4	500	28	0
WT	67	4663	1	1	TSeries-101952021-0947-001	4p_500 pre Hm1a	4	500	29	0
WT	67	4663	1	1	TSeries-101952021-0947-001	4p_500 pre Hm1a	4	500	30	0
WT	67	4663	1	1	TSeries-101952021-0947-001	4p_500 pre Hm1a	4	500	31	0
WT	67	4663	1	1	TSeries-101952021-0947-001	4p_500 pre Hm1a	4	500	32	0
WT	67	4663	1	1	TSeries-101952021-0947-001	4p_500 pre Hm1a	4	500	33	0
WT	67	4663	1	1	TSeries-101952021-0947-001	4p_500 pre Hm1a	4	500	34	0
WT	67	4663	1	1	TSeries-101952021-0947-001	4p_500 pre Hm1a	4	500	35	0
WT	67	4663	1	1	TSeries-101952021-0947-001	4p_500 pre Hm1a	4	500	36	0
WT	67	4663	1	1	TSeries-101952021-0947-001	4p_500 pre Hm1a	4	500	37	0
WT	67	4663	1	1	TSeries-101952021-0947-001	4p_500 pre Hm1a	4	500	38	0
WT	67	4663	1	1	TSeries-101952021-0947-001	4p_500 pre Hm1a	4	500	39	0
WT	67	4663	1	1	TSeries-101952021-0947-001	4p_500 pre Hm1a	4	500	40	0
WT	67	4663	1	1	TSeries-101952021-0947-001	4p_500 pre Hm1a	4	500	41	0
WT	67	4663	1	1	TSeries-101952021-0947-001	4p_500 pre Hm1a	4	500	42	1	0.526838
WT	67	4663	1	1	TSeries-101952021-0947-001	4p_500 pre Hm1a	4	500	43	0
WT	67	4663	1	1	TSeries-101952021-0947-001	4p_500 pre Hm1a	4	500	44	0
WT	67	4663	1	1	TSeries-101952021-0947-001	4p_500 pre Hm1a	4	500	45	0
WT	67	4663	1	1	TSeries-101952021-0947-001	4p_500 pre Hm1a	4	500	46	0
WT	67	4663	1	1	TSeries-101952021-0947-001	4p_500 pre Hm1a	4	500	47	0
WT	67	4663	1	1	TSeries-101952021-0947-001	4p_500 pre Hm1a	4	500	48	0
WT	67	4663	1	1	TSeries-101952021-0947-001	4p_500 pre Hm1a	4	500	49	0
WT	67	4663	1	1	TSeries-101952021-0947-001	4p_500 pre Hm1a	4	500	50	0
WT	67	4663	1	1	TSeries-101952021-0947-001	4p_500 pre Hm1a	4	500	51	0
WT	67	4663	1	1	TSeries-101952021-0947-001	4p_500 pre Hm1a	4	500	52	0
WT	67	4663	1	1	TSeries-101952021-0947-001	4p_500 pre Hm1a	4	500	53	0
WT	67	4663	1	1	TSeries-101952021-0947-001	4p_500 pre Hm1a	4	500	54	0
WT	67	4663	1	1	TSeries-101952021-0947-001	4p_500 pre Hm1a	4	500	55	0
WT	67	4663	1	1	TSeries-101952021-0947-001	4p_500 pre Hm1a	4	500	56	1	0.377968
WT	67	4663	1	1	TSeries-101952021-0947-001	4p_500 pre Hm1a	4	500	57	1	0.255752
WT	67	4663	1	1	TSeries-101952021-0947-001	4p_500 pre Hm1a	4	500	58	1	0.148108
WT	67	4663	1	1	TSeries-101952021-0947-001	4p_500 pre Hm1a	4	500	59	0
WT	67	4663	1	1	TSeries-101952021-0947-001	4p_500 pre Hm1a	4	500	60	0
WT	67	4663	1	1	TSeries-101952021-0947-006	4p_500 Hm1a	4	500	0	1	0.334267
WT	67	4663	1	1	TSeries-101952021-0947-006	4p_500 Hm1a	4	500	1	0
WT	67	4663	1	1	TSeries-101952021-0947-006	4p_500 Hm1a	4	500	2	0
WT	67	4663	1	1	TSeries-101952021-0947-006	4p_500 Hm1a	4	500	3	0
WT	67	4663	1	1	TSeries-101952021-0947-006	4p_500 Hm1a	4	500	4	0
WT	67	4663	1	1	TSeries-101952021-0947-006	4p_500 Hm1a	4	500	5	0
WT	67	4663	1	1	TSeries-101952021-0947-006	4p_500 Hm1a	4	500	6	0
WT	67	4663	1	1	TSeries-101952021-0947-006	4p_500 Hm1a	4	500	7	0
WT	67	4663	1	1	TSeries-101952021-0947-006	4p_500 Hm1a	4	500	8	0
WT	67	4663	1	1	TSeries-101952021-0947-006	4p_500 Hm1a	4	500	9	1	0.250181
WT	67	4663	1	1	TSeries-101952021-0947-006	4p_500 Hm1a	4	500	10	0
WT	67	4663	1	1	TSeries-101952021-0947-006	4p_500 Hm1a	4	500	11	0
WT	67	4663	1	1	TSeries-101952021-0947-006	4p_500 Hm1a	4	500	12	0
WT	67	4663	1	1	TSeries-101952021-0947-006	4p_500 Hm1a	4	500	13	0
WT	67	4663	1	1	TSeries-101952021-0947-006	4p_500 Hm1a	4	500	14	0
WT	67	4663	1	1	TSeries-101952021-0947-006	4p_500 Hm1a	4	500	15	0
WT	67	4663	1	1	TSeries-101952021-0947-006	4p_500 Hm1a	4	500	16	0
WT	67	4663	1	1	TSeries-101952021-0947-006	4p_500 Hm1a	4	500	17	0
WT	67	4663	1	1	TSeries-101952021-0947-006	4p_500 Hm1a	4	500	18	0
WT	67	4663	1	1	TSeries-101952021-0947-006	4p_500 Hm1a	4	500	19	0
WT	67	4663	1	1	TSeries-101952021-0947-006	4p_500 Hm1a	4	500	20	1	0.194214
WT	67	4663	1	1	TSeries-101952021-0947-006	4p_500 Hm1a	4	500	21	0
WT	67	4663	1	1	TSeries-101952021-0947-006	4p_500 Hm1a	4	500	22	0
WT	67	4663	1	1	TSeries-101952021-0947-006	4p_500 Hm1a	4	500	23	0
WT	67	4663	1	1	TSeries-101952021-0947-006	4p_500 Hm1a	4	500	24	0
WT	67	4663	1	1	TSeries-101952021-0947-006	4p_500 Hm1a	4	500	25	0
WT	67	4663	1	1	TSeries-101952021-0947-006	4p_500 Hm1a	4	500	26	0
WT	67	4663	1	1	TSeries-101952021-0947-006	4p_500 Hm1a	4	500	27	0
WT	67	4663	1	1	TSeries-101952021-0947-006	4p_500 Hm1a	4	500	28	0
WT	67	4663	1	1	TSeries-101952021-0947-006	4p_500 Hm1a	4	500	29	0
WT	67	4663	1	1	TSeries-101952021-0947-006	4p_500 Hm1a	4	500	30	0
WT	67	4663	1	1	TSeries-101952021-0947-006	4p_500 Hm1a	4	500	31	0
WT	67	4663	1	1	TSeries-101952021-0947-006	4p_500 Hm1a	4	500	32	0
WT	67	4663	1	1	TSeries-101952021-0947-006	4p_500 Hm1a	4	500	33	0
WT	67	4663	1	1	TSeries-101952021-0947-006	4p_500 Hm1a	4	500	34	0
WT	67	4663	1	1	TSeries-101952021-0947-006	4p_500 Hm1a	4	500	35	0
WT	67	4663	1	1	TSeries-101952021-0947-006	4p_500 Hm1a	4	500	36	0
WT	67	4663	1	1	TSeries-101952021-0947-006	4p_500 Hm1a	4	500	37	0
WT	67	4663	1	1	TSeries-101952021-0947-006	4p_500 Hm1a	4	500	38	0
WT	67	4663	1	1	TSeries-101952021-0947-006	4p_500 Hm1a	4	500	39	0
WT	67	4663	1	1	TSeries-101952021-0947-006	4p_500 Hm1a	4	500	40	0
WT	67	4663	1	1	TSeries-101952021-0947-006	4p_500 Hm1a	4	500	41	0
WT	67	4663	1	1	TSeries-101952021-0947-006	4p_500 Hm1a	4	500	42	1	0.387206
WT	67	4663	1	1	TSeries-101952021-0947-006	4p_500 Hm1a	4	500	43	1	0.418658
WT	67	4663	1	1	TSeries-101952021-0947-006	4p_500 Hm1a	4	500	44	1	0.417176
WT	67	4663	1	1	TSeries-101952021-0947-006	4p_500 Hm1a	4	500	45	1	0.241923
WT	67	4663	1	1	TSeries-101952021-0947-006	4p_500 Hm1a	4	500	46	1	0.179118
WT	67	4663	1	1	TSeries-101952021-0947-006	4p_500 Hm1a	4	500	47	0
WT	67	4663	1	1	TSeries-101952021-0947-006	4p_500 Hm1a	4	500	48	0
WT	67	4663	1	1	TSeries-101952021-0947-006	4p_500 Hm1a	4	500	49	0
WT	67	4663	1	1	TSeries-101952021-0947-006	4p_500 Hm1a	4	500	50	0
WT	67	4663	1	1	TSeries-101952021-0947-006	4p_500 Hm1a	4	500	51	0
WT	67	4663	1	1	TSeries-101952021-0947-006	4p_500 Hm1a	4	500	52	0
WT	67	4663	1	1	TSeries-101952021-0947-006	4p_500 Hm1a	4	500	53	0
WT	67	4663	1	1	TSeries-101952021-0947-006	4p_500 Hm1a	4	500	54	0
WT	67	4663	1	1	TSeries-101952021-0947-006	4p_500 Hm1a	4	500	55	0
WT	67	4663	1	1	TSeries-101952021-0947-006	4p_500 Hm1a	4	500	56	1	0.299585
WT	67	4663	1	1	TSeries-101952021-0947-006	4p_500 Hm1a	4	500	57	0
WT	67	4663	1	1	TSeries-101952021-0947-006	4p_500 Hm1a	4	500	58	1	0.223256
WT	67	4663	1	1	TSeries-101952021-0947-006	4p_500 Hm1a	4	500	59	1	0.295706
WT	67	4663	1	1	TSeries-101952021-0947-006	4p_500 Hm1a	4	500	60	1	0.287993
WT	67	4663	2	2	TSeries-101952021-0947-011	4p_500 pre Hm1a	4	500	0	0
WT	67	4663	2	2	TSeries-101952021-0947-011	4p_500 pre Hm1a	4	500	1	0
WT	67	4663	2	2	TSeries-101952021-0947-011	4p_500 pre Hm1a	4	500	2	0
WT	67	4663	2	2	TSeries-101952021-0947-011	4p_500 pre Hm1a	4	500	3	1	0.379887
WT	67	4663	2	2	TSeries-101952021-0947-011	4p_500 pre Hm1a	4	500	4	0
WT	67	4663	2	2	TSeries-101952021-0947-011	4p_500 pre Hm1a	4	500	5	0
WT	67	4663	2	2	TSeries-101952021-0947-011	4p_500 pre Hm1a	4	500	6	1	0.186929
WT	67	4663	2	2	TSeries-101952021-0947-011	4p_500 pre Hm1a	4	500	7	0
WT	67	4663	2	2	TSeries-101952021-0947-011	4p_500 pre Hm1a	4	500	8	0
WT	67	4663	2	2	TSeries-101952021-0947-011	4p_500 pre Hm1a	4	500	9	1	0.209131
WT	67	4663	2	2	TSeries-101952021-0947-011	4p_500 pre Hm1a	4	500	10	0
WT	67	4663	2	2	TSeries-101952021-0947-011	4p_500 pre Hm1a	4	500	11	0
WT	67	4663	2	2	TSeries-101952021-0947-011	4p_500 pre Hm1a	4	500	12	0
WT	67	4663	2	2	TSeries-101952021-0947-011	4p_500 pre Hm1a	4	500	13	0
WT	67	4663	2	2	TSeries-101952021-0947-011	4p_500 pre Hm1a	4	500	14	0
WT	67	4663	2	2	TSeries-101952021-0947-011	4p_500 pre Hm1a	4	500	15	0
WT	67	4663	2	2	TSeries-101952021-0947-011	4p_500 pre Hm1a	4	500	16	0
WT	67	4663	2	2	TSeries-101952021-0947-011	4p_500 pre Hm1a	4	500	17	0
WT	67	4663	2	2	TSeries-101952021-0947-011	4p_500 pre Hm1a	4	500	18	0
WT	67	4663	2	2	TSeries-101952021-0947-011	4p_500 pre Hm1a	4	500	19	0
WT	67	4663	2	2	TSeries-101952021-0947-011	4p_500 pre Hm1a	4	500	20	0
WT	67	4663	2	2	TSeries-101952021-0947-011	4p_500 pre Hm1a	4	500	21	0
WT	67	4663	2	2	TSeries-101952021-0947-011	4p_500 pre Hm1a	4	500	22	0
WT	67	4663	2	2	TSeries-101952021-0947-011	4p_500 pre Hm1a	4	500	23	1	0.107317
WT	67	4663	2	2	TSeries-101952021-0947-011	4p_500 pre Hm1a	4	500	24	0
WT	67	4663	2	2	TSeries-101952021-0947-011	4p_500 pre Hm1a	4	500	25	0
WT	67	4663	2	2	TSeries-101952021-0947-011	4p_500 pre Hm1a	4	500	26	0
WT	67	4663	2	2	TSeries-101952021-0947-011	4p_500 pre Hm1a	4	500	27	0
WT	67	4663	2	2	TSeries-101952021-0947-011	4p_500 pre Hm1a	4	500	28	0
WT	67	4663	2	2	TSeries-101952021-0947-011	4p_500 pre Hm1a	4	500	29	0
WT	67	4663	2	2	TSeries-101952021-0947-011	4p_500 pre Hm1a	4	500	30	0
WT	67	4663	2	2	TSeries-101952021-0947-011	4p_500 pre Hm1a	4	500	31	0
WT	67	4663	2	2	TSeries-101952021-0947-011	4p_500 pre Hm1a	4	500	32	0
WT	67	4663	2	2	TSeries-101952021-0947-011	4p_500 pre Hm1a	4	500	33	0
WT	67	4663	2	2	TSeries-101952021-0947-011	4p_500 pre Hm1a	4	500	34	0
WT	67	4663	2	2	TSeries-101952021-0947-011	4p_500 pre Hm1a	4	500	35	0
WT	67	4663	2	2	TSeries-101952021-0947-011	4p_500 pre Hm1a	4	500	36	0
WT	67	4663	2	2	TSeries-101952021-0947-011	4p_500 pre Hm1a	4	500	37	0
WT	67	4663	2	2	TSeries-101952021-0947-011	4p_500 pre Hm1a	4	500	38	0
WT	67	4663	2	2	TSeries-101952021-0947-011	4p_500 pre Hm1a	4	500	39	0
WT	67	4663	2	2	TSeries-101952021-0947-011	4p_500 pre Hm1a	4	500	40	0
WT	67	4663	2	2	TSeries-101952021-0947-011	4p_500 pre Hm1a	4	500	41	0
WT	67	4663	2	2	TSeries-101952021-0947-011	4p_500 pre Hm1a	4	500	42	0
WT	67	4663	2	2	TSeries-101952021-0947-011	4p_500 pre Hm1a	4	500	43	1	0.137793
WT	67	4663	2	2	TSeries-101952021-0947-011	4p_500 pre Hm1a	4	500	44	0
WT	67	4663	2	2	TSeries-101952021-0947-011	4p_500 pre Hm1a	4	500	45	0
WT	67	4663	2	2	TSeries-101952021-0947-011	4p_500 pre Hm1a	4	500	46	0
WT	67	4663	2	2	TSeries-101952021-0947-011	4p_500 pre Hm1a	4	500	47	0
WT	67	4663	2	2	TSeries-101952021-0947-011	4p_500 pre Hm1a	4	500	48	0
WT	67	4663	2	2	TSeries-101952021-0947-011	4p_500 pre Hm1a	4	500	49	0
WT	67	4663	2	2	TSeries-101952021-0947-011	4p_500 pre Hm1a	4	500	50	0
WT	67	4663	2	2	TSeries-101952021-0947-011	4p_500 pre Hm1a	4	500	51	0
WT	67	4663	2	2	TSeries-101952021-0947-011	4p_500 pre Hm1a	4	500	52	0
WT	67	4663	2	2	TSeries-101952021-0947-011	4p_500 pre Hm1a	4	500	53	0
WT	67	4663	2	2	TSeries-101952021-0947-011	4p_500 pre Hm1a	4	500	54	0
WT	67	4663	2	2	TSeries-101952021-0947-011	4p_500 pre Hm1a	4	500	55	0
WT	67	4663	2	2	TSeries-101952021-0947-011	4p_500 pre Hm1a	4	500	56	0
WT	67	4663	2	2	TSeries-101952021-0947-011	4p_500 pre Hm1a	4	500	57	0
WT	67	4663	2	2	TSeries-101952021-0947-011	4p_500 pre Hm1a	4	500	58	0
WT	67	4663	2	2	TSeries-101952021-0947-011	4p_500 pre Hm1a	4	500	59	0
WT	67	4663	2	2	TSeries-101952021-0947-011	4p_500 pre Hm1a	4	500	60	0
WT	67	4663	2	2	TSeries-101952021-0947-011	4p_500 pre Hm1a	4	500	61	0
WT	67	4663	2	2	TSeries-101952021-0947-011	4p_500 pre Hm1a	4	500	62	0
WT	67	4663	2	2	TSeries-101952021-0947-011	4p_500 pre Hm1a	4	500	63	0
WT	67	4663	2	2	TSeries-101952021-0947-011	4p_500 pre Hm1a	4	500	64	0
WT	67	4663	2	2	TSeries-101952021-0947-011	4p_500 pre Hm1a	4	500	65	0
WT	67	4663	2	2	TSeries-101952021-0947-011	4p_500 pre Hm1a	4	500	66	0
WT	67	4663	2	2	TSeries-101952021-0947-011	4p_500 pre Hm1a	4	500	67	0
WT	67	4663	2	2	TSeries-101952021-0947-011	4p_500 pre Hm1a	4	500	68	0
WT	67	4663	2	2	TSeries-101952021-0947-011	4p_500 pre Hm1a	4	500	69	1	0.346752
WT	67	4663	2	2	TSeries-101952021-0947-011	4p_500 pre Hm1a	4	500	70	1	0.133559
WT	67	4663	2	2	TSeries-101952021-0947-016	4p_500 Hm1a	4	500	0	1	0.343332
WT	67	4663	2	2	TSeries-101952021-0947-016	4p_500 Hm1a	4	500	1	0
WT	67	4663	2	2	TSeries-101952021-0947-016	4p_500 Hm1a	4	500	2	1	0.493782
WT	67	4663	2	2	TSeries-101952021-0947-016	4p_500 Hm1a	4	500	3	1	0.477407
WT	67	4663	2	2	TSeries-101952021-0947-016	4p_500 Hm1a	4	500	4	0
WT	67	4663	2	2	TSeries-101952021-0947-016	4p_500 Hm1a	4	500	5	1	0.665354
WT	67	4663	2	2	TSeries-101952021-0947-016	4p_500 Hm1a	4	500	6	1	0.401045
WT	67	4663	2	2	TSeries-101952021-0947-016	4p_500 Hm1a	4	500	7	1	0.395079
WT	67	4663	2	2	TSeries-101952021-0947-016	4p_500 Hm1a	4	500	8	1	0.259592
WT	67	4663	2	2	TSeries-101952021-0947-016	4p_500 Hm1a	4	500	9	1	0.273952
WT	67	4663	2	2	TSeries-101952021-0947-016	4p_500 Hm1a	4	500	10	1	0.277496
WT	67	4663	2	2	TSeries-101952021-0947-016	4p_500 Hm1a	4	500	11	1	0.635743
WT	67	4663	2	2	TSeries-101952021-0947-016	4p_500 Hm1a	4	500	12	1	0.185184
WT	67	4663	2	2	TSeries-101952021-0947-016	4p_500 Hm1a	4	500	13	1	1.0224
WT	67	4663	2	2	TSeries-101952021-0947-016	4p_500 Hm1a	4	500	14	1	0.190542
WT	67	4663	2	2	TSeries-101952021-0947-016	4p_500 Hm1a	4	500	15	0
WT	67	4663	2	2	TSeries-101952021-0947-016	4p_500 Hm1a	4	500	16	0
WT	67	4663	2	2	TSeries-101952021-0947-016	4p_500 Hm1a	4	500	17	0
WT	67	4663	2	2	TSeries-101952021-0947-016	4p_500 Hm1a	4	500	18	0
WT	67	4663	2	2	TSeries-101952021-0947-016	4p_500 Hm1a	4	500	19	0
WT	67	4663	2	2	TSeries-101952021-0947-016	4p_500 Hm1a	4	500	20	0
WT	67	4663	2	2	TSeries-101952021-0947-016	4p_500 Hm1a	4	500	21	0
WT	67	4663	2	2	TSeries-101952021-0947-016	4p_500 Hm1a	4	500	22	0
WT	67	4663	2	2	TSeries-101952021-0947-016	4p_500 Hm1a	4	500	23	0
WT	67	4663	2	2	TSeries-101952021-0947-016	4p_500 Hm1a	4	500	24	0
WT	67	4663	2	2	TSeries-101952021-0947-016	4p_500 Hm1a	4	500	25	0
WT	67	4663	2	2	TSeries-101952021-0947-016	4p_500 Hm1a	4	500	26	0
WT	67	4663	2	2	TSeries-101952021-0947-016	4p_500 Hm1a	4	500	27	0
WT	67	4663	2	2	TSeries-101952021-0947-016	4p_500 Hm1a	4	500	28	0
WT	67	4663	2	2	TSeries-101952021-0947-016	4p_500 Hm1a	4	500	29	0
WT	67	4663	2	2	TSeries-101952021-0947-016	4p_500 Hm1a	4	500	30	0
WT	67	4663	2	2	TSeries-101952021-0947-016	4p_500 Hm1a	4	500	31	0
WT	67	4663	2	2	TSeries-101952021-0947-016	4p_500 Hm1a	4	500	32	0
WT	67	4663	2	2	TSeries-101952021-0947-016	4p_500 Hm1a	4	500	33	0
WT	67	4663	2	2	TSeries-101952021-0947-016	4p_500 Hm1a	4	500	34	0
WT	67	4663	2	2	TSeries-101952021-0947-016	4p_500 Hm1a	4	500	35	0
WT	67	4663	2	2	TSeries-101952021-0947-016	4p_500 Hm1a	4	500	36	0
WT	67	4663	2	2	TSeries-101952021-0947-016	4p_500 Hm1a	4	500	37	0
WT	67	4663	2	2	TSeries-101952021-0947-016	4p_500 Hm1a	4	500	38	1	0.395322
WT	67	4663	2	2	TSeries-101952021-0947-016	4p_500 Hm1a	4	500	39	0
WT	67	4663	2	2	TSeries-101952021-0947-016	4p_500 Hm1a	4	500	40	0
WT	67	4663	2	2	TSeries-101952021-0947-016	4p_500 Hm1a	4	500	41	0
WT	67	4663	2	2	TSeries-101952021-0947-016	4p_500 Hm1a	4	500	42	0
WT	67	4663	2	2	TSeries-101952021-0947-016	4p_500 Hm1a	4	500	43	1	0.191709
WT	67	4663	2	2	TSeries-101952021-0947-016	4p_500 Hm1a	4	500	44	0
WT	67	4663	2	2	TSeries-101952021-0947-016	4p_500 Hm1a	4	500	45	0
WT	67	4663	2	2	TSeries-101952021-0947-016	4p_500 Hm1a	4	500	46	0
WT	67	4663	2	2	TSeries-101952021-0947-016	4p_500 Hm1a	4	500	47	0
WT	67	4663	2	2	TSeries-101952021-0947-016	4p_500 Hm1a	4	500	48	0
WT	67	4663	2	2	TSeries-101952021-0947-016	4p_500 Hm1a	4	500	49	0
WT	67	4663	2	2	TSeries-101952021-0947-016	4p_500 Hm1a	4	500	50	0
WT	67	4663	2	2	TSeries-101952021-0947-016	4p_500 Hm1a	4	500	51	0
WT	67	4663	2	2	TSeries-101952021-0947-016	4p_500 Hm1a	4	500	52	0
WT	67	4663	2	2	TSeries-101952021-0947-016	4p_500 Hm1a	4	500	53	0
WT	67	4663	2	2	TSeries-101952021-0947-016	4p_500 Hm1a	4	500	54	0
WT	67	4663	2	2	TSeries-101952021-0947-016	4p_500 Hm1a	4	500	55	1	0.29539
WT	67	4663	2	2	TSeries-101952021-0947-016	4p_500 Hm1a	4	500	56	1	0.278691
WT	67	4663	2	2	TSeries-101952021-0947-016	4p_500 Hm1a	4	500	57	0
WT	67	4663	2	2	TSeries-101952021-0947-016	4p_500 Hm1a	4	500	58	0
WT	67	4663	2	2	TSeries-101952021-0947-016	4p_500 Hm1a	4	500	59	0
WT	67	4663	2	2	TSeries-101952021-0947-016	4p_500 Hm1a	4	500	60	0
WT	67	4663	2	2	TSeries-101952021-0947-016	4p_500 Hm1a	4	500	61	0
WT	67	4663	2	2	TSeries-101952021-0947-016	4p_500 Hm1a	4	500	62	0
WT	67	4663	2	2	TSeries-101952021-0947-016	4p_500 Hm1a	4	500	63	0
WT	67	4663	2	2	TSeries-101952021-0947-016	4p_500 Hm1a	4	500	64	0
WT	67	4663	2	2	TSeries-101952021-0947-016	4p_500 Hm1a	4	500	65	0
WT	67	4663	2	2	TSeries-101952021-0947-016	4p_500 Hm1a	4	500	66	0
WT	67	4663	2	2	TSeries-101952021-0947-016	4p_500 Hm1a	4	500	67	0
WT	67	4663	2	2	TSeries-101952021-0947-016	4p_500 Hm1a	4	500	68	0
WT	67	4663	2	2	TSeries-101952021-0947-016	4p_500 Hm1a	4	500	69	1	0.595664
WT	67	4663	2	2	TSeries-101952021-0947-016	4p_500 Hm1a	4	500	70	0
WT	67	4663	3	3	TSeries-101952021-0947-021	4p_500 pre Hm1a	4	500	0	1	0.37423
WT	67	4663	3	3	TSeries-101952021-0947-021	4p_500 pre Hm1a	4	500	1	0
WT	67	4663	3	3	TSeries-101952021-0947-021	4p_500 pre Hm1a	4	500	2	0
WT	67	4663	3	3	TSeries-101952021-0947-021	4p_500 pre Hm1a	4	500	3	0
WT	67	4663	3	3	TSeries-101952021-0947-021	4p_500 pre Hm1a	4	500	4	0
WT	67	4663	3	3	TSeries-101952021-0947-021	4p_500 pre Hm1a	4	500	5	0
WT	67	4663	3	3	TSeries-101952021-0947-021	4p_500 pre Hm1a	4	500	6	0
WT	67	4663	3	3	TSeries-101952021-0947-021	4p_500 pre Hm1a	4	500	7	0
WT	67	4663	3	3	TSeries-101952021-0947-021	4p_500 pre Hm1a	4	500	8	0
WT	67	4663	3	3	TSeries-101952021-0947-021	4p_500 pre Hm1a	4	500	9	0
WT	67	4663	3	3	TSeries-101952021-0947-021	4p_500 pre Hm1a	4	500	10	0
WT	67	4663	3	3	TSeries-101952021-0947-021	4p_500 pre Hm1a	4	500	11	0
WT	67	4663	3	3	TSeries-101952021-0947-021	4p_500 pre Hm1a	4	500	12	0
WT	67	4663	3	3	TSeries-101952021-0947-021	4p_500 pre Hm1a	4	500	13	0
WT	67	4663	3	3	TSeries-101952021-0947-021	4p_500 pre Hm1a	4	500	14	0
WT	67	4663	3	3	TSeries-101952021-0947-021	4p_500 pre Hm1a	4	500	15	0
WT	67	4663	3	3	TSeries-101952021-0947-021	4p_500 pre Hm1a	4	500	16	0
WT	67	4663	3	3	TSeries-101952021-0947-021	4p_500 pre Hm1a	4	500	17	0
WT	67	4663	3	3	TSeries-101952021-0947-021	4p_500 pre Hm1a	4	500	18	0
WT	67	4663	3	3	TSeries-101952021-0947-021	4p_500 pre Hm1a	4	500	19	0
WT	67	4663	3	3	TSeries-101952021-0947-021	4p_500 pre Hm1a	4	500	20	0
WT	67	4663	3	3	TSeries-101952021-0947-021	4p_500 pre Hm1a	4	500	21	0
WT	67	4663	3	3	TSeries-101952021-0947-021	4p_500 pre Hm1a	4	500	22	0
WT	67	4663	3	3	TSeries-101952021-0947-021	4p_500 pre Hm1a	4	500	23	0
WT	67	4663	3	3	TSeries-101952021-0947-021	4p_500 pre Hm1a	4	500	24	0
WT	67	4663	3	3	TSeries-101952021-0947-021	4p_500 pre Hm1a	4	500	25	0
WT	67	4663	3	3	TSeries-101952021-0947-021	4p_500 pre Hm1a	4	500	26	0
WT	67	4663	3	3	TSeries-101952021-0947-021	4p_500 pre Hm1a	4	500	27	0
WT	67	4663	3	3	TSeries-101952021-0947-021	4p_500 pre Hm1a	4	500	28	0
WT	67	4663	3	3	TSeries-101952021-0947-021	4p_500 pre Hm1a	4	500	29	0
WT	67	4663	3	3	TSeries-101952021-0947-021	4p_500 pre Hm1a	4	500	30	1	0.430461
WT	67	4663	3	3	TSeries-101952021-0947-021	4p_500 pre Hm1a	4	500	31	0
WT	67	4663	3	3	TSeries-101952021-0947-021	4p_500 pre Hm1a	4	500	32	0
WT	67	4663	3	3	TSeries-101952021-0947-021	4p_500 pre Hm1a	4	500	33	0
WT	67	4663	3	3	TSeries-101952021-0947-021	4p_500 pre Hm1a	4	500	34	0
WT	67	4663	3	3	TSeries-101952021-0947-021	4p_500 pre Hm1a	4	500	35	0
WT	67	4663	3	3	TSeries-101952021-0947-021	4p_500 pre Hm1a	4	500	36	0
WT	67	4663	3	3	TSeries-101952021-0947-021	4p_500 pre Hm1a	4	500	37	0
WT	67	4663	3	3	TSeries-101952021-0947-021	4p_500 pre Hm1a	4	500	38	0
WT	67	4663	3	3	TSeries-101952021-0947-021	4p_500 pre Hm1a	4	500	39	0
WT	67	4663	3	3	TSeries-101952021-0947-021	4p_500 pre Hm1a	4	500	40	0
WT	67	4663	3	3	TSeries-101952021-0947-021	4p_500 pre Hm1a	4	500	41	0
WT	67	4663	3	3	TSeries-101952021-0947-021	4p_500 pre Hm1a	4	500	42	0
WT	67	4663	3	3	TSeries-101952021-0947-021	4p_500 pre Hm1a	4	500	43	0
WT	67	4663	3	3	TSeries-101952021-0947-021	4p_500 pre Hm1a	4	500	44	0
WT	67	4663	3	3	TSeries-101952021-0947-021	4p_500 pre Hm1a	4	500	45	0
WT	67	4663	3	3	TSeries-101952021-0947-021	4p_500 pre Hm1a	4	500	46	0
WT	67	4663	3	3	TSeries-101952021-0947-021	4p_500 pre Hm1a	4	500	47	0
WT	67	4663	3	3	TSeries-101952021-0947-021	4p_500 pre Hm1a	4	500	48	0
WT	67	4663	3	3	TSeries-101952021-0947-021	4p_500 pre Hm1a	4	500	49	0
WT	67	4663	3	3	TSeries-101952021-0947-021	4p_500 pre Hm1a	4	500	50	0
WT	67	4663	3	3	TSeries-101952021-0947-021	4p_500 pre Hm1a	4	500	51	0
WT	67	4663	3	3	TSeries-101952021-0947-021	4p_500 pre Hm1a	4	500	52	0
WT	67	4663	3	3	TSeries-101952021-0947-021	4p_500 pre Hm1a	4	500	53	0
WT	67	4663	3	3	TSeries-101952021-0947-021	4p_500 pre Hm1a	4	500	54	0
WT	67	4663	3	3	TSeries-101952021-0947-021	4p_500 pre Hm1a	4	500	55	0
WT	67	4663	3	3	TSeries-101952021-0947-021	4p_500 pre Hm1a	4	500	56	0
WT	67	4663	3	3	TSeries-101952021-0947-021	4p_500 pre Hm1a	4	500	57	0
WT	67	4663	3	3	TSeries-101952021-0947-021	4p_500 pre Hm1a	4	500	58	0
WT	67	4663	3	3	TSeries-101952021-0947-021	4p_500 pre Hm1a	4	500	59	0
WT	67	4663	3	3	TSeries-101952021-0947-021	4p_500 pre Hm1a	4	500	60	0
WT	67	4663	3	3	TSeries-101952021-0947-021	4p_500 pre Hm1a	4	500	61	1	0.174528
WT	67	4663	3	3	TSeries-101952021-0947-021	4p_500 pre Hm1a	4	500	62	0
WT	67	4663	3	3	TSeries-101952021-0947-021	4p_500 pre Hm1a	4	500	63	0
WT	67	4663	3	3	TSeries-101952021-0947-021	4p_500 pre Hm1a	4	500	64	0
WT	67	4663	3	3	TSeries-101952021-0947-021	4p_500 pre Hm1a	4	500	65	0
WT	67	4663	3	3	TSeries-101952021-0947-021	4p_500 pre Hm1a	4	500	66	0
WT	67	4663	3	3	TSeries-101952021-0947-021	4p_500 pre Hm1a	4	500	67	0
WT	67	4663	3	3	TSeries-101952021-0947-021	4p_500 pre Hm1a	4	500	68	0
WT	67	4663	3	3	TSeries-101952021-0947-021	4p_500 pre Hm1a	4	500	69	0
WT	67	4663	3	3	TSeries-101952021-0947-026	4p_500 Hm1a	4	500	0	1	0.407336
WT	67	4663	3	3	TSeries-101952021-0947-026	4p_500 Hm1a	4	500	1	0
WT	67	4663	3	3	TSeries-101952021-0947-026	4p_500 Hm1a	4	500	2	0
WT	67	4663	3	3	TSeries-101952021-0947-026	4p_500 Hm1a	4	500	3	0
WT	67	4663	3	3	TSeries-101952021-0947-026	4p_500 Hm1a	4	500	4	0
WT	67	4663	3	3	TSeries-101952021-0947-026	4p_500 Hm1a	4	500	5	0
WT	67	4663	3	3	TSeries-101952021-0947-026	4p_500 Hm1a	4	500	6	0
WT	67	4663	3	3	TSeries-101952021-0947-026	4p_500 Hm1a	4	500	7	0
WT	67	4663	3	3	TSeries-101952021-0947-026	4p_500 Hm1a	4	500	8	0
WT	67	4663	3	3	TSeries-101952021-0947-026	4p_500 Hm1a	4	500	9	0
WT	67	4663	3	3	TSeries-101952021-0947-026	4p_500 Hm1a	4	500	10	0
WT	67	4663	3	3	TSeries-101952021-0947-026	4p_500 Hm1a	4	500	11	0
WT	67	4663	3	3	TSeries-101952021-0947-026	4p_500 Hm1a	4	500	12	1	0.156161
WT	67	4663	3	3	TSeries-101952021-0947-026	4p_500 Hm1a	4	500	13	0
WT	67	4663	3	3	TSeries-101952021-0947-026	4p_500 Hm1a	4	500	14	0
WT	67	4663	3	3	TSeries-101952021-0947-026	4p_500 Hm1a	4	500	15	0
WT	67	4663	3	3	TSeries-101952021-0947-026	4p_500 Hm1a	4	500	16	1	0.114814
WT	67	4663	3	3	TSeries-101952021-0947-026	4p_500 Hm1a	4	500	17	0
WT	67	4663	3	3	TSeries-101952021-0947-026	4p_500 Hm1a	4	500	18	0
WT	67	4663	3	3	TSeries-101952021-0947-026	4p_500 Hm1a	4	500	19	0
WT	67	4663	3	3	TSeries-101952021-0947-026	4p_500 Hm1a	4	500	20	0
WT	67	4663	3	3	TSeries-101952021-0947-026	4p_500 Hm1a	4	500	21	0
WT	67	4663	3	3	TSeries-101952021-0947-026	4p_500 Hm1a	4	500	22	0
WT	67	4663	3	3	TSeries-101952021-0947-026	4p_500 Hm1a	4	500	23	0
WT	67	4663	3	3	TSeries-101952021-0947-026	4p_500 Hm1a	4	500	24	0
WT	67	4663	3	3	TSeries-101952021-0947-026	4p_500 Hm1a	4	500	25	0
WT	67	4663	3	3	TSeries-101952021-0947-026	4p_500 Hm1a	4	500	26	0
WT	67	4663	3	3	TSeries-101952021-0947-026	4p_500 Hm1a	4	500	27	1	0.168355
WT	67	4663	3	3	TSeries-101952021-0947-026	4p_500 Hm1a	4	500	28	0
WT	67	4663	3	3	TSeries-101952021-0947-026	4p_500 Hm1a	4	500	29	0
WT	67	4663	3	3	TSeries-101952021-0947-026	4p_500 Hm1a	4	500	30	1	0.440581
WT	67	4663	3	3	TSeries-101952021-0947-026	4p_500 Hm1a	4	500	31	1	0.242053
WT	67	4663	3	3	TSeries-101952021-0947-026	4p_500 Hm1a	4	500	32	0
WT	67	4663	3	3	TSeries-101952021-0947-026	4p_500 Hm1a	4	500	33	0
WT	67	4663	3	3	TSeries-101952021-0947-026	4p_500 Hm1a	4	500	34	0
WT	67	4663	3	3	TSeries-101952021-0947-026	4p_500 Hm1a	4	500	35	0
WT	67	4663	3	3	TSeries-101952021-0947-026	4p_500 Hm1a	4	500	36	0
WT	67	4663	3	3	TSeries-101952021-0947-026	4p_500 Hm1a	4	500	37	0
WT	67	4663	3	3	TSeries-101952021-0947-026	4p_500 Hm1a	4	500	38	0
WT	67	4663	3	3	TSeries-101952021-0947-026	4p_500 Hm1a	4	500	39	0
WT	67	4663	3	3	TSeries-101952021-0947-026	4p_500 Hm1a	4	500	40	0
WT	67	4663	3	3	TSeries-101952021-0947-026	4p_500 Hm1a	4	500	41	0
WT	67	4663	3	3	TSeries-101952021-0947-026	4p_500 Hm1a	4	500	42	0
WT	67	4663	3	3	TSeries-101952021-0947-026	4p_500 Hm1a	4	500	43	0
WT	67	4663	3	3	TSeries-101952021-0947-026	4p_500 Hm1a	4	500	44	0
WT	67	4663	3	3	TSeries-101952021-0947-026	4p_500 Hm1a	4	500	45	1	0.149212
WT	67	4663	3	3	TSeries-101952021-0947-026	4p_500 Hm1a	4	500	46	0
WT	67	4663	3	3	TSeries-101952021-0947-026	4p_500 Hm1a	4	500	47	0
WT	67	4663	3	3	TSeries-101952021-0947-026	4p_500 Hm1a	4	500	48	0
WT	67	4663	3	3	TSeries-101952021-0947-026	4p_500 Hm1a	4	500	49	0
WT	67	4663	3	3	TSeries-101952021-0947-026	4p_500 Hm1a	4	500	50	0
WT	67	4663	3	3	TSeries-101952021-0947-026	4p_500 Hm1a	4	500	51	0
WT	67	4663	3	3	TSeries-101952021-0947-026	4p_500 Hm1a	4	500	52	0
WT	67	4663	3	3	TSeries-101952021-0947-026	4p_500 Hm1a	4	500	53	0
WT	67	4663	3	3	TSeries-101952021-0947-026	4p_500 Hm1a	4	500	54	1	0.154393
WT	67	4663	3	3	TSeries-101952021-0947-026	4p_500 Hm1a	4	500	55	0
WT	67	4663	3	3	TSeries-101952021-0947-026	4p_500 Hm1a	4	500	56	0
WT	67	4663	3	3	TSeries-101952021-0947-026	4p_500 Hm1a	4	500	57	0
WT	67	4663	3	3	TSeries-101952021-0947-026	4p_500 Hm1a	4	500	58	0
WT	67	4663	3	3	TSeries-101952021-0947-026	4p_500 Hm1a	4	500	59	0
WT	67	4663	3	3	TSeries-101952021-0947-026	4p_500 Hm1a	4	500	60	0
WT	67	4663	3	3	TSeries-101952021-0947-026	4p_500 Hm1a	4	500	61	1	0.232538
WT	67	4663	3	3	TSeries-101952021-0947-026	4p_500 Hm1a	4	500	62	1	0.348604
WT	67	4663	3	3	TSeries-101952021-0947-026	4p_500 Hm1a	4	500	63	0
WT	67	4663	3	3	TSeries-101952021-0947-026	4p_500 Hm1a	4	500	64	0
WT	67	4663	3	3	TSeries-101952021-0947-026	4p_500 Hm1a	4	500	65	0
WT	67	4663	3	3	TSeries-101952021-0947-026	4p_500 Hm1a	4	500	66	0
WT	67	4663	3	3	TSeries-101952021-0947-026	4p_500 Hm1a	4	500	67	0
WT	67	4663	3	3	TSeries-101952021-0947-026	4p_500 Hm1a	4	500	68	1	0.138118
WT	67	4663	3	3	TSeries-101952021-0947-026	4p_500 Hm1a	4	500	69	0
WT	67	4663	4	4	TSeries-101952021-0947-031	4p_500 pre Hm1a	4	500	0	1	0.111755
WT	67	4663	4	4	TSeries-101952021-0947-031	4p_500 pre Hm1a	4	500	1	1	0.397805
WT	67	4663	4	4	TSeries-101952021-0947-031	4p_500 pre Hm1a	4	500	2	0
WT	67	4663	4	4	TSeries-101952021-0947-031	4p_500 pre Hm1a	4	500	3	0
WT	67	4663	4	4	TSeries-101952021-0947-031	4p_500 pre Hm1a	4	500	4	0
WT	67	4663	4	4	TSeries-101952021-0947-031	4p_500 pre Hm1a	4	500	5	1	0.182137
WT	67	4663	4	4	TSeries-101952021-0947-031	4p_500 pre Hm1a	4	500	6	0
WT	67	4663	4	4	TSeries-101952021-0947-031	4p_500 pre Hm1a	4	500	7	0
WT	67	4663	4	4	TSeries-101952021-0947-031	4p_500 pre Hm1a	4	500	8	0
WT	67	4663	4	4	TSeries-101952021-0947-031	4p_500 pre Hm1a	4	500	9	0
WT	67	4663	4	4	TSeries-101952021-0947-031	4p_500 pre Hm1a	4	500	10	0
WT	67	4663	4	4	TSeries-101952021-0947-031	4p_500 pre Hm1a	4	500	11	0
WT	67	4663	4	4	TSeries-101952021-0947-031	4p_500 pre Hm1a	4	500	12	0
WT	67	4663	4	4	TSeries-101952021-0947-031	4p_500 pre Hm1a	4	500	13	1	0.238134
WT	67	4663	4	4	TSeries-101952021-0947-031	4p_500 pre Hm1a	4	500	14	1	0.254944
WT	67	4663	4	4	TSeries-101952021-0947-031	4p_500 pre Hm1a	4	500	15	1	0.268169
WT	67	4663	4	4	TSeries-101952021-0947-031	4p_500 pre Hm1a	4	500	16	1	0.269806
WT	67	4663	4	4	TSeries-101952021-0947-031	4p_500 pre Hm1a	4	500	17	1	0.430024
WT	67	4663	4	4	TSeries-101952021-0947-031	4p_500 pre Hm1a	4	500	18	1	0.266779
WT	67	4663	4	4	TSeries-101952021-0947-031	4p_500 pre Hm1a	4	500	19	0
WT	67	4663	4	4	TSeries-101952021-0947-031	4p_500 pre Hm1a	4	500	20	1	0.20487
WT	67	4663	4	4	TSeries-101952021-0947-031	4p_500 pre Hm1a	4	500	21	0
WT	67	4663	4	4	TSeries-101952021-0947-031	4p_500 pre Hm1a	4	500	22	0
WT	67	4663	4	4	TSeries-101952021-0947-031	4p_500 pre Hm1a	4	500	23	1	0.207205
WT	67	4663	4	4	TSeries-101952021-0947-031	4p_500 pre Hm1a	4	500	24	1	0.252028
WT	67	4663	4	4	TSeries-101952021-0947-031	4p_500 pre Hm1a	4	500	25	1	0.146826
WT	67	4663	4	4	TSeries-101952021-0947-031	4p_500 pre Hm1a	4	500	26	1	0.265577
WT	67	4663	4	4	TSeries-101952021-0947-031	4p_500 pre Hm1a	4	500	27	1	0.423155
WT	67	4663	4	4	TSeries-101952021-0947-031	4p_500 pre Hm1a	4	500	28	1	0.438207
WT	67	4663	4	4	TSeries-101952021-0947-031	4p_500 pre Hm1a	4	500	29	1	0.31456
WT	67	4663	4	4	TSeries-101952021-0947-031	4p_500 pre Hm1a	4	500	30	1	0.286938
WT	67	4663	4	4	TSeries-101952021-0947-031	4p_500 pre Hm1a	4	500	31	1	0.384153
WT	67	4663	4	4	TSeries-101952021-0947-031	4p_500 pre Hm1a	4	500	32	0
WT	67	4663	4	4	TSeries-101952021-0947-031	4p_500 pre Hm1a	4	500	33	1	0.314586
WT	67	4663	4	4	TSeries-101952021-0947-031	4p_500 pre Hm1a	4	500	34	1	0.465698
WT	67	4663	4	4	TSeries-101952021-0947-031	4p_500 pre Hm1a	4	500	35	1	0.283264
WT	67	4663	4	4	TSeries-101952021-0947-031	4p_500 pre Hm1a	4	500	36	1	0.278516
WT	67	4663	4	4	TSeries-101952021-0947-031	4p_500 pre Hm1a	4	500	37	1	0.31918
WT	67	4663	4	4	TSeries-101952021-0947-031	4p_500 pre Hm1a	4	500	38	1	0.241849
WT	67	4663	4	4	TSeries-101952021-0947-031	4p_500 pre Hm1a	4	500	39	1	0.329093
WT	67	4663	4	4	TSeries-101952021-0947-031	4p_500 pre Hm1a	4	500	40	1	0.218215
WT	67	4663	4	4	TSeries-101952021-0947-031	4p_500 pre Hm1a	4	500	41	1	0.259272
WT	67	4663	4	4	TSeries-101952021-0947-031	4p_500 pre Hm1a	4	500	42	1	0.209546
WT	67	4663	4	4	TSeries-101952021-0947-031	4p_500 pre Hm1a	4	500	43	1	0.368352
WT	67	4663	4	4	TSeries-101952021-0947-031	4p_500 pre Hm1a	4	500	44	1	0.38132
WT	67	4663	4	4	TSeries-101952021-0947-031	4p_500 pre Hm1a	4	500	45	1	0.398917
WT	67	4663	4	4	TSeries-101952021-0947-031	4p_500 pre Hm1a	4	500	46	1	0.270334
WT	67	4663	4	4	TSeries-101952021-0947-031	4p_500 pre Hm1a	4	500	47	1	0.598465
WT	67	4663	4	4	TSeries-101952021-0947-031	4p_500 pre Hm1a	4	500	48	1	0.492722
WT	67	4663	4	4	TSeries-101952021-0947-031	4p_500 pre Hm1a	4	500	49	1	0.579055
WT	67	4663	4	4	TSeries-101952021-0947-031	4p_500 pre Hm1a	4	500	50	1	0.618141
WT	67	4663	4	4	TSeries-101952021-0947-031	4p_500 pre Hm1a	4	500	51	1	0.386012
WT	67	4663	4	4	TSeries-101952021-0947-031	4p_500 pre Hm1a	4	500	52	1	0.746115
WT	67	4663	4	4	TSeries-101952021-0947-031	4p_500 pre Hm1a	4	500	53	1	0.824228
WT	67	4663	4	4	TSeries-101952021-0947-031	4p_500 pre Hm1a	4	500	54	1	0.711556
WT	67	4663	4	4	TSeries-101952021-0947-031	4p_500 pre Hm1a	4	500	55	0
WT	67	4663	4	4	TSeries-101952021-0947-031	4p_500 pre Hm1a	4	500	56	1	0.520094
WT	67	4663	4	4	TSeries-101952021-0947-031	4p_500 pre Hm1a	4	500	57	1	0.425077
WT	67	4663	4	4	TSeries-101952021-0947-031	4p_500 pre Hm1a	4	500	58	1	0.530702
WT	67	4663	4	4	TSeries-101952021-0947-036	4p_500 Hm1a	4	500	0	0
WT	67	4663	4	4	TSeries-101952021-0947-036	4p_500 Hm1a	4	500	1	1	0.374724
WT	67	4663	4	4	TSeries-101952021-0947-036	4p_500 Hm1a	4	500	2	1	0.150233
WT	67	4663	4	4	TSeries-101952021-0947-036	4p_500 Hm1a	4	500	3	1	0.135197
WT	67	4663	4	4	TSeries-101952021-0947-036	4p_500 Hm1a	4	500	4	0
WT	67	4663	4	4	TSeries-101952021-0947-036	4p_500 Hm1a	4	500	5	1	0.209162
WT	67	4663	4	4	TSeries-101952021-0947-036	4p_500 Hm1a	4	500	6	0
WT	67	4663	4	4	TSeries-101952021-0947-036	4p_500 Hm1a	4	500	7	0
WT	67	4663	4	4	TSeries-101952021-0947-036	4p_500 Hm1a	4	500	8	0
WT	67	4663	4	4	TSeries-101952021-0947-036	4p_500 Hm1a	4	500	9	1	0.238468
WT	67	4663	4	4	TSeries-101952021-0947-036	4p_500 Hm1a	4	500	10	0
WT	67	4663	4	4	TSeries-101952021-0947-036	4p_500 Hm1a	4	500	11	0
WT	67	4663	4	4	TSeries-101952021-0947-036	4p_500 Hm1a	4	500	12	0
WT	67	4663	4	4	TSeries-101952021-0947-036	4p_500 Hm1a	4	500	13	0
WT	67	4663	4	4	TSeries-101952021-0947-036	4p_500 Hm1a	4	500	14	1	0.313323
WT	67	4663	4	4	TSeries-101952021-0947-036	4p_500 Hm1a	4	500	15	0
WT	67	4663	4	4	TSeries-101952021-0947-036	4p_500 Hm1a	4	500	16	0
WT	67	4663	4	4	TSeries-101952021-0947-036	4p_500 Hm1a	4	500	17	0
WT	67	4663	4	4	TSeries-101952021-0947-036	4p_500 Hm1a	4	500	18	1	0.204419
WT	67	4663	4	4	TSeries-101952021-0947-036	4p_500 Hm1a	4	500	19	0
WT	67	4663	4	4	TSeries-101952021-0947-036	4p_500 Hm1a	4	500	20	0
WT	67	4663	4	4	TSeries-101952021-0947-036	4p_500 Hm1a	4	500	21	0
WT	67	4663	4	4	TSeries-101952021-0947-036	4p_500 Hm1a	4	500	22	0
WT	67	4663	4	4	TSeries-101952021-0947-036	4p_500 Hm1a	4	500	23	0
WT	67	4663	4	4	TSeries-101952021-0947-036	4p_500 Hm1a	4	500	24	0
WT	67	4663	4	4	TSeries-101952021-0947-036	4p_500 Hm1a	4	500	25	0
WT	67	4663	4	4	TSeries-101952021-0947-036	4p_500 Hm1a	4	500	26	0
WT	67	4663	4	4	TSeries-101952021-0947-036	4p_500 Hm1a	4	500	27	1	0.270687
WT	67	4663	4	4	TSeries-101952021-0947-036	4p_500 Hm1a	4	500	28	0
WT	67	4663	4	4	TSeries-101952021-0947-036	4p_500 Hm1a	4	500	29	0
WT	67	4663	4	4	TSeries-101952021-0947-036	4p_500 Hm1a	4	500	30	0
WT	67	4663	4	4	TSeries-101952021-0947-036	4p_500 Hm1a	4	500	31	0
WT	67	4663	4	4	TSeries-101952021-0947-036	4p_500 Hm1a	4	500	32	0
WT	67	4663	4	4	TSeries-101952021-0947-036	4p_500 Hm1a	4	500	33	1	0.377694
WT	67	4663	4	4	TSeries-101952021-0947-036	4p_500 Hm1a	4	500	34	1	0.351576
WT	67	4663	4	4	TSeries-101952021-0947-036	4p_500 Hm1a	4	500	35	1	0.275799
WT	67	4663	4	4	TSeries-101952021-0947-036	4p_500 Hm1a	4	500	36	0
WT	67	4663	4	4	TSeries-101952021-0947-036	4p_500 Hm1a	4	500	37	0
WT	67	4663	4	4	TSeries-101952021-0947-036	4p_500 Hm1a	4	500	38	1	0.186473
WT	67	4663	4	4	TSeries-101952021-0947-036	4p_500 Hm1a	4	500	39	0
WT	67	4663	4	4	TSeries-101952021-0947-036	4p_500 Hm1a	4	500	40	0
WT	67	4663	4	4	TSeries-101952021-0947-036	4p_500 Hm1a	4	500	41	0
WT	67	4663	4	4	TSeries-101952021-0947-036	4p_500 Hm1a	4	500	42	0
WT	67	4663	4	4	TSeries-101952021-0947-036	4p_500 Hm1a	4	500	43	1	0.377251
WT	67	4663	4	4	TSeries-101952021-0947-036	4p_500 Hm1a	4	500	44	1	0.368726
WT	67	4663	4	4	TSeries-101952021-0947-036	4p_500 Hm1a	4	500	45	1	0.255715
WT	67	4663	4	4	TSeries-101952021-0947-036	4p_500 Hm1a	4	500	46	0
WT	67	4663	4	4	TSeries-101952021-0947-036	4p_500 Hm1a	4	500	47	1	0.311411
WT	67	4663	4	4	TSeries-101952021-0947-036	4p_500 Hm1a	4	500	48	0
WT	67	4663	4	4	TSeries-101952021-0947-036	4p_500 Hm1a	4	500	49	1	0.499805
WT	67	4663	4	4	TSeries-101952021-0947-036	4p_500 Hm1a	4	500	50	1	0.458927
WT	67	4663	4	4	TSeries-101952021-0947-036	4p_500 Hm1a	4	500	51	1	0.313839
WT	67	4663	4	4	TSeries-101952021-0947-036	4p_500 Hm1a	4	500	52	1	0.703032
WT	67	4663	4	4	TSeries-101952021-0947-036	4p_500 Hm1a	4	500	53	1	0.696776
WT	67	4663	4	4	TSeries-101952021-0947-036	4p_500 Hm1a	4	500	54	1	0.700716
WT	67	4663	4	4	TSeries-101952021-0947-036	4p_500 Hm1a	4	500	55	0
WT	67	4663	4	4	TSeries-101952021-0947-036	4p_500 Hm1a	4	500	56	1	0.240359
WT	67	4663	4	4	TSeries-101952021-0947-036	4p_500 Hm1a	4	500	57	0
WT	67	4663	4	4	TSeries-101952021-0947-036	4p_500 Hm1a	4	500	58	1	0.619298
WT	67	4666	1	1	TSeries-101952021-0947-051	4p_500 pre Hm1a	4	500	0	0
WT	67	4666	1	1	TSeries-101952021-0947-051	4p_500 pre Hm1a	4	500	1	0
WT	67	4666	1	1	TSeries-101952021-0947-051	4p_500 pre Hm1a	4	500	2	1	0.278818
WT	67	4666	1	1	TSeries-101952021-0947-051	4p_500 pre Hm1a	4	500	3	0
WT	67	4666	1	1	TSeries-101952021-0947-051	4p_500 pre Hm1a	4	500	4	1	0.305539
WT	67	4666	1	1	TSeries-101952021-0947-051	4p_500 pre Hm1a	4	500	5	0
WT	67	4666	1	1	TSeries-101952021-0947-051	4p_500 pre Hm1a	4	500	6	1	0.310741
WT	67	4666	1	1	TSeries-101952021-0947-051	4p_500 pre Hm1a	4	500	7	1	0.320885
WT	67	4666	1	1	TSeries-101952021-0947-051	4p_500 pre Hm1a	4	500	8	0
WT	67	4666	1	1	TSeries-101952021-0947-051	4p_500 pre Hm1a	4	500	9	1	0.19232
WT	67	4666	1	1	TSeries-101952021-0947-051	4p_500 pre Hm1a	4	500	10	1	0.355164
WT	67	4666	1	1	TSeries-101952021-0947-051	4p_500 pre Hm1a	4	500	11	1	0.24316
WT	67	4666	1	1	TSeries-101952021-0947-051	4p_500 pre Hm1a	4	500	12	0
WT	67	4666	1	1	TSeries-101952021-0947-051	4p_500 pre Hm1a	4	500	13	1	0.332835
WT	67	4666	1	1	TSeries-101952021-0947-051	4p_500 pre Hm1a	4	500	14	0
WT	67	4666	1	1	TSeries-101952021-0947-051	4p_500 pre Hm1a	4	500	15	1	0.432853
WT	67	4666	1	1	TSeries-101952021-0947-051	4p_500 pre Hm1a	4	500	16	0
WT	67	4666	1	1	TSeries-101952021-0947-051	4p_500 pre Hm1a	4	500	17	1	0.344959
WT	67	4666	1	1	TSeries-101952021-0947-051	4p_500 pre Hm1a	4	500	18	0
WT	67	4666	1	1	TSeries-101952021-0947-051	4p_500 pre Hm1a	4	500	19	1	0.229677
WT	67	4666	1	1	TSeries-101952021-0947-051	4p_500 pre Hm1a	4	500	20	0
WT	67	4666	1	1	TSeries-101952021-0947-051	4p_500 pre Hm1a	4	500	21	0
WT	67	4666	1	1	TSeries-101952021-0947-051	4p_500 pre Hm1a	4	500	22	0
WT	67	4666	1	1	TSeries-101952021-0947-051	4p_500 pre Hm1a	4	500	23	0
WT	67	4666	1	1	TSeries-101952021-0947-051	4p_500 pre Hm1a	4	500	24	1	0.295943
WT	67	4666	1	1	TSeries-101952021-0947-051	4p_500 pre Hm1a	4	500	25	1	0.243793
WT	67	4666	1	1	TSeries-101952021-0947-051	4p_500 pre Hm1a	4	500	26	1	0.254928
WT	67	4666	1	1	TSeries-101952021-0947-051	4p_500 pre Hm1a	4	500	27	0
WT	67	4666	1	1	TSeries-101952021-0947-051	4p_500 pre Hm1a	4	500	28	0
WT	67	4666	1	1	TSeries-101952021-0947-051	4p_500 pre Hm1a	4	500	29	0
WT	67	4666	1	1	TSeries-101952021-0947-051	4p_500 pre Hm1a	4	500	30	0
WT	67	4666	1	1	TSeries-101952021-0947-051	4p_500 pre Hm1a	4	500	31	1	0.319812
WT	67	4666	1	1	TSeries-101952021-0947-051	4p_500 pre Hm1a	4	500	32	1	0.360199
WT	67	4666	1	1	TSeries-101952021-0947-051	4p_500 pre Hm1a	4	500	33	0
WT	67	4666	1	1	TSeries-101952021-0947-051	4p_500 pre Hm1a	4	500	34	0
WT	67	4666	1	1	TSeries-101952021-0947-051	4p_500 pre Hm1a	4	500	35	0
WT	67	4666	1	1	TSeries-101952021-0947-051	4p_500 pre Hm1a	4	500	36	0
WT	67	4666	1	1	TSeries-101952021-0947-051	4p_500 pre Hm1a	4	500	37	0
WT	67	4666	1	1	TSeries-101952021-0947-051	4p_500 pre Hm1a	4	500	38	0
WT	67	4666	1	1	TSeries-101952021-0947-051	4p_500 pre Hm1a	4	500	39	0
WT	67	4666	1	1	TSeries-101952021-0947-051	4p_500 pre Hm1a	4	500	40	0
WT	67	4666	1	1	TSeries-101952021-0947-051	4p_500 pre Hm1a	4	500	41	0
WT	67	4666	1	1	TSeries-101952021-0947-051	4p_500 pre Hm1a	4	500	42	0
WT	67	4666	1	1	TSeries-101952021-0947-051	4p_500 pre Hm1a	4	500	43	1	0.454737
WT	67	4666	1	1	TSeries-101952021-0947-051	4p_500 pre Hm1a	4	500	44	1	0.2069
WT	67	4666	1	1	TSeries-101952021-0947-051	4p_500 pre Hm1a	4	500	45	0
WT	67	4666	1	1	TSeries-101952021-0947-051	4p_500 pre Hm1a	4	500	46	1	0.30601
WT	67	4666	1	1	TSeries-101952021-0947-056	4p_500 Hm1a	4	500	0	0
WT	67	4666	1	1	TSeries-101952021-0947-056	4p_500 Hm1a	4	500	1	1	0.332531
WT	67	4666	1	1	TSeries-101952021-0947-056	4p_500 Hm1a	4	500	2	1	0.301202
WT	67	4666	1	1	TSeries-101952021-0947-056	4p_500 Hm1a	4	500	3	1	0.210258
WT	67	4666	1	1	TSeries-101952021-0947-056	4p_500 Hm1a	4	500	4	1	0.343185
WT	67	4666	1	1	TSeries-101952021-0947-056	4p_500 Hm1a	4	500	5	1	0.266371
WT	67	4666	1	1	TSeries-101952021-0947-056	4p_500 Hm1a	4	500	6	1	0.369405
WT	67	4666	1	1	TSeries-101952021-0947-056	4p_500 Hm1a	4	500	7	1	0.30771
WT	67	4666	1	1	TSeries-101952021-0947-056	4p_500 Hm1a	4	500	8	0
WT	67	4666	1	1	TSeries-101952021-0947-056	4p_500 Hm1a	4	500	9	1	0.157067
WT	67	4666	1	1	TSeries-101952021-0947-056	4p_500 Hm1a	4	500	10	1	0.317313
WT	67	4666	1	1	TSeries-101952021-0947-056	4p_500 Hm1a	4	500	11	0
WT	67	4666	1	1	TSeries-101952021-0947-056	4p_500 Hm1a	4	500	12	1	0.254699
WT	67	4666	1	1	TSeries-101952021-0947-056	4p_500 Hm1a	4	500	13	1	0.373575
WT	67	4666	1	1	TSeries-101952021-0947-056	4p_500 Hm1a	4	500	14	1	0.230518
WT	67	4666	1	1	TSeries-101952021-0947-056	4p_500 Hm1a	4	500	15	1	0.324674
WT	67	4666	1	1	TSeries-101952021-0947-056	4p_500 Hm1a	4	500	16	0
WT	67	4666	1	1	TSeries-101952021-0947-056	4p_500 Hm1a	4	500	17	1	0.240803
WT	67	4666	1	1	TSeries-101952021-0947-056	4p_500 Hm1a	4	500	18	1	0.210925
WT	67	4666	1	1	TSeries-101952021-0947-056	4p_500 Hm1a	4	500	19	0
WT	67	4666	1	1	TSeries-101952021-0947-056	4p_500 Hm1a	4	500	20	0
WT	67	4666	1	1	TSeries-101952021-0947-056	4p_500 Hm1a	4	500	21	0
WT	67	4666	1	1	TSeries-101952021-0947-056	4p_500 Hm1a	4	500	22	0
WT	67	4666	1	1	TSeries-101952021-0947-056	4p_500 Hm1a	4	500	23	1	0.143876
WT	67	4666	1	1	TSeries-101952021-0947-056	4p_500 Hm1a	4	500	24	1	0.27409
WT	67	4666	1	1	TSeries-101952021-0947-056	4p_500 Hm1a	4	500	25	1	0.22146
WT	67	4666	1	1	TSeries-101952021-0947-056	4p_500 Hm1a	4	500	26	1	0.203511
WT	67	4666	1	1	TSeries-101952021-0947-056	4p_500 Hm1a	4	500	27	0
WT	67	4666	1	1	TSeries-101952021-0947-056	4p_500 Hm1a	4	500	28	0
WT	67	4666	1	1	TSeries-101952021-0947-056	4p_500 Hm1a	4	500	29	1	0.17137
WT	67	4666	1	1	TSeries-101952021-0947-056	4p_500 Hm1a	4	500	30	1	0.202721
WT	67	4666	1	1	TSeries-101952021-0947-056	4p_500 Hm1a	4	500	31	1	0.362051
WT	67	4666	1	1	TSeries-101952021-0947-056	4p_500 Hm1a	4	500	32	1	0.512268
WT	67	4666	1	1	TSeries-101952021-0947-056	4p_500 Hm1a	4	500	33	1	0.198375
WT	67	4666	1	1	TSeries-101952021-0947-056	4p_500 Hm1a	4	500	34	0
WT	67	4666	1	1	TSeries-101952021-0947-056	4p_500 Hm1a	4	500	35	0
WT	67	4666	1	1	TSeries-101952021-0947-056	4p_500 Hm1a	4	500	36	1	0.1728
WT	67	4666	1	1	TSeries-101952021-0947-056	4p_500 Hm1a	4	500	37	1	0.211735
WT	67	4666	1	1	TSeries-101952021-0947-056	4p_500 Hm1a	4	500	38	0
WT	67	4666	1	1	TSeries-101952021-0947-056	4p_500 Hm1a	4	500	39	0
WT	67	4666	1	1	TSeries-101952021-0947-056	4p_500 Hm1a	4	500	40	1	0.274266
WT	67	4666	1	1	TSeries-101952021-0947-056	4p_500 Hm1a	4	500	41	0
WT	67	4666	1	1	TSeries-101952021-0947-056	4p_500 Hm1a	4	500	42	0
WT	67	4666	1	1	TSeries-101952021-0947-056	4p_500 Hm1a	4	500	43	1	0.301392
WT	67	4666	1	1	TSeries-101952021-0947-056	4p_500 Hm1a	4	500	44	0
WT	67	4666	1	1	TSeries-101952021-0947-056	4p_500 Hm1a	4	500	45	1	0.173011
WT	67	4666	1	1	TSeries-101952021-0947-056	4p_500 Hm1a	4	500	46	1	0.304003
WT	67	4666	2	2	TSeries-101952021-0947-061	4p_500 pre Hm1a	4	500	0	1	0.171904
WT	67	4666	2	2	TSeries-101952021-0947-061	4p_500 pre Hm1a	4	500	1	1	0.298775
WT	67	4666	2	2	TSeries-101952021-0947-061	4p_500 pre Hm1a	4	500	2	1	0.21989
WT	67	4666	2	2	TSeries-101952021-0947-061	4p_500 pre Hm1a	4	500	3	1	0.302795
WT	67	4666	2	2	TSeries-101952021-0947-061	4p_500 pre Hm1a	4	500	4	1	0.486753
WT	67	4666	2	2	TSeries-101952021-0947-061	4p_500 pre Hm1a	4	500	5	0
WT	67	4666	2	2	TSeries-101952021-0947-061	4p_500 pre Hm1a	4	500	6	1	0.196846
WT	67	4666	2	2	TSeries-101952021-0947-061	4p_500 pre Hm1a	4	500	7	0
WT	67	4666	2	2	TSeries-101952021-0947-061	4p_500 pre Hm1a	4	500	8	0
WT	67	4666	2	2	TSeries-101952021-0947-061	4p_500 pre Hm1a	4	500	9	0
WT	67	4666	2	2	TSeries-101952021-0947-061	4p_500 pre Hm1a	4	500	10	0
WT	67	4666	2	2	TSeries-101952021-0947-061	4p_500 pre Hm1a	4	500	11	0
WT	67	4666	2	2	TSeries-101952021-0947-061	4p_500 pre Hm1a	4	500	12	0
WT	67	4666	2	2	TSeries-101952021-0947-061	4p_500 pre Hm1a	4	500	13	0
WT	67	4666	2	2	TSeries-101952021-0947-061	4p_500 pre Hm1a	4	500	14	1	0.195497
WT	67	4666	2	2	TSeries-101952021-0947-061	4p_500 pre Hm1a	4	500	15	1	0.116755
WT	67	4666	2	2	TSeries-101952021-0947-061	4p_500 pre Hm1a	4	500	16	1	0.619648
WT	67	4666	2	2	TSeries-101952021-0947-061	4p_500 pre Hm1a	4	500	17	0
WT	67	4666	2	2	TSeries-101952021-0947-061	4p_500 pre Hm1a	4	500	18	0
WT	67	4666	2	2	TSeries-101952021-0947-061	4p_500 pre Hm1a	4	500	19	0
WT	67	4666	2	2	TSeries-101952021-0947-061	4p_500 pre Hm1a	4	500	20	1	0.222043
WT	67	4666	2	2	TSeries-101952021-0947-061	4p_500 pre Hm1a	4	500	21	0
WT	67	4666	2	2	TSeries-101952021-0947-061	4p_500 pre Hm1a	4	500	22	0
WT	67	4666	2	2	TSeries-101952021-0947-061	4p_500 pre Hm1a	4	500	23	1	0.193646
WT	67	4666	2	2	TSeries-101952021-0947-061	4p_500 pre Hm1a	4	500	24	0
WT	67	4666	2	2	TSeries-101952021-0947-061	4p_500 pre Hm1a	4	500	25	0
WT	67	4666	2	2	TSeries-101952021-0947-061	4p_500 pre Hm1a	4	500	26	0
WT	67	4666	2	2	TSeries-101952021-0947-061	4p_500 pre Hm1a	4	500	27	1	0.170787
WT	67	4666	2	2	TSeries-101952021-0947-061	4p_500 pre Hm1a	4	500	28	0
WT	67	4666	2	2	TSeries-101952021-0947-061	4p_500 pre Hm1a	4	500	29	0
WT	67	4666	2	2	TSeries-101952021-0947-061	4p_500 pre Hm1a	4	500	30	0
WT	67	4666	2	2	TSeries-101952021-0947-061	4p_500 pre Hm1a	4	500	31	1	0.114345
WT	67	4666	2	2	TSeries-101952021-0947-061	4p_500 pre Hm1a	4	500	32	0
WT	67	4666	2	2	TSeries-101952021-0947-061	4p_500 pre Hm1a	4	500	33	0
WT	67	4666	2	2	TSeries-101952021-0947-061	4p_500 pre Hm1a	4	500	34	1	0.21228
WT	67	4666	2	2	TSeries-101952021-0947-061	4p_500 pre Hm1a	4	500	35	1	0.156951
WT	67	4666	2	2	TSeries-101952021-0947-061	4p_500 pre Hm1a	4	500	36	0
WT	67	4666	2	2	TSeries-101952021-0947-061	4p_500 pre Hm1a	4	500	37	0
WT	67	4666	2	2	TSeries-101952021-0947-061	4p_500 pre Hm1a	4	500	38	0
WT	67	4666	2	2	TSeries-101952021-0947-061	4p_500 pre Hm1a	4	500	39	1	0.178739
WT	67	4666	2	2	TSeries-101952021-0947-061	4p_500 pre Hm1a	4	500	40	1	0.326653
WT	67	4666	2	2	TSeries-101952021-0947-061	4p_500 pre Hm1a	4	500	41	0
WT	67	4666	2	2	TSeries-101952021-0947-061	4p_500 pre Hm1a	4	500	42	0
WT	67	4666	2	2	TSeries-101952021-0947-061	4p_500 pre Hm1a	4	500	43	1	0.120473
WT	67	4666	2	2	TSeries-101952021-0947-061	4p_500 pre Hm1a	4	500	44	1	0.157209
WT	67	4666	2	2	TSeries-101952021-0947-061	4p_500 pre Hm1a	4	500	45	1	0.421018
WT	67	4666	2	2	TSeries-101952021-0947-061	4p_500 pre Hm1a	4	500	46	1	0.2012
WT	67	4666	2	2	TSeries-101952021-0947-061	4p_500 pre Hm1a	4	500	47	0
WT	67	4666	2	2	TSeries-101952021-0947-061	4p_500 pre Hm1a	4	500	48	0
WT	67	4666	2	2	TSeries-101952021-0947-061	4p_500 pre Hm1a	4	500	49	0
WT	67	4666	2	2	TSeries-101952021-0947-061	4p_500 pre Hm1a	4	500	50	0
WT	67	4666	2	2	TSeries-101952021-0947-061	4p_500 pre Hm1a	4	500	51	1	0.305936
WT	67	4666	2	2	TSeries-101952021-0947-061	4p_500 pre Hm1a	4	500	52	0
WT	67	4666	2	2	TSeries-101952021-0947-061	4p_500 pre Hm1a	4	500	53	0
WT	67	4666	2	2	TSeries-101952021-0947-061	4p_500 pre Hm1a	4	500	54	0
WT	67	4666	2	2	TSeries-101952021-0947-061	4p_500 pre Hm1a	4	500	55	1	0.142859
WT	67	4666	2	2	TSeries-101952021-0947-061	4p_500 pre Hm1a	4	500	56	1	0.11679
WT	67	4666	2	2	TSeries-101952021-0947-061	4p_500 pre Hm1a	4	500	57	0
WT	67	4666	2	2	TSeries-101952021-0947-061	4p_500 pre Hm1a	4	500	58	0
WT	67	4666	2	2	TSeries-101952021-0947-061	4p_500 pre Hm1a	4	500	59	1	0.17031
WT	67	4666	2	2	TSeries-101952021-0947-061	4p_500 pre Hm1a	4	500	60	1	0.228967
WT	67	4666	2	2	TSeries-101952021-0947-061	4p_500 pre Hm1a	4	500	61	0
WT	67	4666	2	2	TSeries-101952021-0947-061	4p_500 pre Hm1a	4	500	62	0
WT	67	4666	2	2	TSeries-101952021-0947-061	4p_500 pre Hm1a	4	500	63	0
WT	67	4666	2	2	TSeries-101952021-0947-061	4p_500 pre Hm1a	4	500	64	0
WT	67	4666	2	2	TSeries-101952021-0947-061	4p_500 pre Hm1a	4	500	65	1	0.336354
WT	67	4666	2	2	TSeries-101952021-0947-061	4p_500 pre Hm1a	4	500	66	0
WT	67	4666	2	2	TSeries-101952021-0947-061	4p_500 pre Hm1a	4	500	67	0
WT	67	4666	2	2	TSeries-101952021-0947-061	4p_500 pre Hm1a	4	500	68	0
WT	67	4666	2	2	TSeries-101952021-0947-061	4p_500 pre Hm1a	4	500	69	1	0.160328
WT	67	4666	2	2	TSeries-101952021-0947-061	4p_500 pre Hm1a	4	500	70	0
WT	67	4666	2	2	TSeries-101952021-0947-061	4p_500 pre Hm1a	4	500	71	1	0.204089
WT	67	4666	2	2	TSeries-101952021-0947-061	4p_500 pre Hm1a	4	500	72	0
WT	67	4666	2	2	TSeries-101952021-0947-066	4p_500 Hm1a	4	500	0	0
WT	67	4666	2	2	TSeries-101952021-0947-066	4p_500 Hm1a	4	500	1	1	0.324934
WT	67	4666	2	2	TSeries-101952021-0947-066	4p_500 Hm1a	4	500	2	0
WT	67	4666	2	2	TSeries-101952021-0947-066	4p_500 Hm1a	4	500	3	0
WT	67	4666	2	2	TSeries-101952021-0947-066	4p_500 Hm1a	4	500	4	1	0.359771
WT	67	4666	2	2	TSeries-101952021-0947-066	4p_500 Hm1a	4	500	5	1	0.185916
WT	67	4666	2	2	TSeries-101952021-0947-066	4p_500 Hm1a	4	500	6	0
WT	67	4666	2	2	TSeries-101952021-0947-066	4p_500 Hm1a	4	500	7	0
WT	67	4666	2	2	TSeries-101952021-0947-066	4p_500 Hm1a	4	500	8	0
WT	67	4666	2	2	TSeries-101952021-0947-066	4p_500 Hm1a	4	500	9	1	0.13717
WT	67	4666	2	2	TSeries-101952021-0947-066	4p_500 Hm1a	4	500	10	0
WT	67	4666	2	2	TSeries-101952021-0947-066	4p_500 Hm1a	4	500	11	0
WT	67	4666	2	2	TSeries-101952021-0947-066	4p_500 Hm1a	4	500	12	0
WT	67	4666	2	2	TSeries-101952021-0947-066	4p_500 Hm1a	4	500	13	0
WT	67	4666	2	2	TSeries-101952021-0947-066	4p_500 Hm1a	4	500	14	0
WT	67	4666	2	2	TSeries-101952021-0947-066	4p_500 Hm1a	4	500	15	0
WT	67	4666	2	2	TSeries-101952021-0947-066	4p_500 Hm1a	4	500	16	0
WT	67	4666	2	2	TSeries-101952021-0947-066	4p_500 Hm1a	4	500	17	0
WT	67	4666	2	2	TSeries-101952021-0947-066	4p_500 Hm1a	4	500	18	0
WT	67	4666	2	2	TSeries-101952021-0947-066	4p_500 Hm1a	4	500	19	0
WT	67	4666	2	2	TSeries-101952021-0947-066	4p_500 Hm1a	4	500	20	1	0.172269
WT	67	4666	2	2	TSeries-101952021-0947-066	4p_500 Hm1a	4	500	21	1	0.165964
WT	67	4666	2	2	TSeries-101952021-0947-066	4p_500 Hm1a	4	500	22	0
WT	67	4666	2	2	TSeries-101952021-0947-066	4p_500 Hm1a	4	500	23	1	0.26682
WT	67	4666	2	2	TSeries-101952021-0947-066	4p_500 Hm1a	4	500	24	0
WT	67	4666	2	2	TSeries-101952021-0947-066	4p_500 Hm1a	4	500	25	0
WT	67	4666	2	2	TSeries-101952021-0947-066	4p_500 Hm1a	4	500	26	0
WT	67	4666	2	2	TSeries-101952021-0947-066	4p_500 Hm1a	4	500	27	0
WT	67	4666	2	2	TSeries-101952021-0947-066	4p_500 Hm1a	4	500	28	0
WT	67	4666	2	2	TSeries-101952021-0947-066	4p_500 Hm1a	4	500	29	0
WT	67	4666	2	2	TSeries-101952021-0947-066	4p_500 Hm1a	4	500	30	0
WT	67	4666	2	2	TSeries-101952021-0947-066	4p_500 Hm1a	4	500	31	0
WT	67	4666	2	2	TSeries-101952021-0947-066	4p_500 Hm1a	4	500	32	1	0.135801
WT	67	4666	2	2	TSeries-101952021-0947-066	4p_500 Hm1a	4	500	33	1	0.160925
WT	67	4666	2	2	TSeries-101952021-0947-066	4p_500 Hm1a	4	500	34	1	0.203036
WT	67	4666	2	2	TSeries-101952021-0947-066	4p_500 Hm1a	4	500	35	0
WT	67	4666	2	2	TSeries-101952021-0947-066	4p_500 Hm1a	4	500	36	1	0.101036
WT	67	4666	2	2	TSeries-101952021-0947-066	4p_500 Hm1a	4	500	37	0
WT	67	4666	2	2	TSeries-101952021-0947-066	4p_500 Hm1a	4	500	38	0
WT	67	4666	2	2	TSeries-101952021-0947-066	4p_500 Hm1a	4	500	39	0
WT	67	4666	2	2	TSeries-101952021-0947-066	4p_500 Hm1a	4	500	40	0
WT	67	4666	2	2	TSeries-101952021-0947-066	4p_500 Hm1a	4	500	41	1	0.153514
WT	67	4666	2	2	TSeries-101952021-0947-066	4p_500 Hm1a	4	500	42	0
WT	67	4666	2	2	TSeries-101952021-0947-066	4p_500 Hm1a	4	500	43	0
WT	67	4666	2	2	TSeries-101952021-0947-066	4p_500 Hm1a	4	500	44	0
WT	67	4666	2	2	TSeries-101952021-0947-066	4p_500 Hm1a	4	500	45	1	0.303675
WT	67	4666	2	2	TSeries-101952021-0947-066	4p_500 Hm1a	4	500	46	0
WT	67	4666	2	2	TSeries-101952021-0947-066	4p_500 Hm1a	4	500	47	0
WT	67	4666	2	2	TSeries-101952021-0947-066	4p_500 Hm1a	4	500	48	0
WT	67	4666	2	2	TSeries-101952021-0947-066	4p_500 Hm1a	4	500	49	0
WT	67	4666	2	2	TSeries-101952021-0947-066	4p_500 Hm1a	4	500	50	0
WT	67	4666	2	2	TSeries-101952021-0947-066	4p_500 Hm1a	4	500	51	1	0.25877
WT	67	4666	2	2	TSeries-101952021-0947-066	4p_500 Hm1a	4	500	52	0
WT	67	4666	2	2	TSeries-101952021-0947-066	4p_500 Hm1a	4	500	53	1	0.141453
WT	67	4666	2	2	TSeries-101952021-0947-066	4p_500 Hm1a	4	500	54	1	0.108224
WT	67	4666	2	2	TSeries-101952021-0947-066	4p_500 Hm1a	4	500	55	0
WT	67	4666	2	2	TSeries-101952021-0947-066	4p_500 Hm1a	4	500	56	0
WT	67	4666	2	2	TSeries-101952021-0947-066	4p_500 Hm1a	4	500	57	0
WT	67	4666	2	2	TSeries-101952021-0947-066	4p_500 Hm1a	4	500	58	0
WT	67	4666	2	2	TSeries-101952021-0947-066	4p_500 Hm1a	4	500	59	0
WT	67	4666	2	2	TSeries-101952021-0947-066	4p_500 Hm1a	4	500	60	0
WT	67	4666	2	2	TSeries-101952021-0947-066	4p_500 Hm1a	4	500	61	0
WT	67	4666	2	2	TSeries-101952021-0947-066	4p_500 Hm1a	4	500	62	1	0.140908
WT	67	4666	2	2	TSeries-101952021-0947-066	4p_500 Hm1a	4	500	63	0
WT	67	4666	2	2	TSeries-101952021-0947-066	4p_500 Hm1a	4	500	64	0
WT	67	4666	2	2	TSeries-101952021-0947-066	4p_500 Hm1a	4	500	65	0
WT	67	4666	2	2	TSeries-101952021-0947-066	4p_500 Hm1a	4	500	66	0
WT	67	4666	2	2	TSeries-101952021-0947-066	4p_500 Hm1a	4	500	67	1	0.133017
WT	67	4666	2	2	TSeries-101952021-0947-066	4p_500 Hm1a	4	500	68	0
WT	67	4666	2	2	TSeries-101952021-0947-066	4p_500 Hm1a	4	500	69	0
WT	67	4666	2	2	TSeries-101952021-0947-066	4p_500 Hm1a	4	500	70	0
WT	67	4666	2	2	TSeries-101952021-0947-066	4p_500 Hm1a	4	500	71	1	0.148796
WT	67	4666	2	2	TSeries-101952021-0947-066	4p_500 Hm1a	4	500	72	0
WT	67	4666	3	3	TSeries-101952021-0947-071	4p_500 pre Hm1a	4	500	0	1	0.159236
WT	67	4666	3	3	TSeries-101952021-0947-071	4p_500 pre Hm1a	4	500	1	1	0.253432
WT	67	4666	3	3	TSeries-101952021-0947-071	4p_500 pre Hm1a	4	500	2	1	0.454852
WT	67	4666	3	3	TSeries-101952021-0947-071	4p_500 pre Hm1a	4	500	3	1	0.418209
WT	67	4666	3	3	TSeries-101952021-0947-071	4p_500 pre Hm1a	4	500	4	1	0.328802
WT	67	4666	3	3	TSeries-101952021-0947-071	4p_500 pre Hm1a	4	500	5	1	0.436846
WT	67	4666	3	3	TSeries-101952021-0947-071	4p_500 pre Hm1a	4	500	6	0
WT	67	4666	3	3	TSeries-101952021-0947-071	4p_500 pre Hm1a	4	500	7	1	0.202585
WT	67	4666	3	3	TSeries-101952021-0947-071	4p_500 pre Hm1a	4	500	8	1	0.183473
WT	67	4666	3	3	TSeries-101952021-0947-071	4p_500 pre Hm1a	4	500	9	1	0.374234
WT	67	4666	3	3	TSeries-101952021-0947-071	4p_500 pre Hm1a	4	500	10	1	0.321394
WT	67	4666	3	3	TSeries-101952021-0947-071	4p_500 pre Hm1a	4	500	11	0
WT	67	4666	3	3	TSeries-101952021-0947-071	4p_500 pre Hm1a	4	500	12	1	0.30183
WT	67	4666	3	3	TSeries-101952021-0947-071	4p_500 pre Hm1a	4	500	13	0
WT	67	4666	3	3	TSeries-101952021-0947-071	4p_500 pre Hm1a	4	500	14	1	0.206924
WT	67	4666	3	3	TSeries-101952021-0947-071	4p_500 pre Hm1a	4	500	15	1	0.124692
WT	67	4666	3	3	TSeries-101952021-0947-071	4p_500 pre Hm1a	4	500	16	0
WT	67	4666	3	3	TSeries-101952021-0947-071	4p_500 pre Hm1a	4	500	17	0
WT	67	4666	3	3	TSeries-101952021-0947-071	4p_500 pre Hm1a	4	500	18	0
WT	67	4666	3	3	TSeries-101952021-0947-071	4p_500 pre Hm1a	4	500	19	1	0.27082
WT	67	4666	3	3	TSeries-101952021-0947-071	4p_500 pre Hm1a	4	500	20	0
WT	67	4666	3	3	TSeries-101952021-0947-071	4p_500 pre Hm1a	4	500	21	0
WT	67	4666	3	3	TSeries-101952021-0947-071	4p_500 pre Hm1a	4	500	22	1	0.160825
WT	67	4666	3	3	TSeries-101952021-0947-071	4p_500 pre Hm1a	4	500	23	0
WT	67	4666	3	3	TSeries-101952021-0947-071	4p_500 pre Hm1a	4	500	24	0
WT	67	4666	3	3	TSeries-101952021-0947-071	4p_500 pre Hm1a	4	500	25	0
WT	67	4666	3	3	TSeries-101952021-0947-071	4p_500 pre Hm1a	4	500	26	0
WT	67	4666	3	3	TSeries-101952021-0947-071	4p_500 pre Hm1a	4	500	27	0
WT	67	4666	3	3	TSeries-101952021-0947-071	4p_500 pre Hm1a	4	500	28	1	0.175895
WT	67	4666	3	3	TSeries-101952021-0947-071	4p_500 pre Hm1a	4	500	29	0
WT	67	4666	3	3	TSeries-101952021-0947-071	4p_500 pre Hm1a	4	500	30	0
WT	67	4666	3	3	TSeries-101952021-0947-071	4p_500 pre Hm1a	4	500	31	0
WT	67	4666	3	3	TSeries-101952021-0947-071	4p_500 pre Hm1a	4	500	32	0
WT	67	4666	3	3	TSeries-101952021-0947-071	4p_500 pre Hm1a	4	500	33	0
WT	67	4666	3	3	TSeries-101952021-0947-071	4p_500 pre Hm1a	4	500	34	1	0.249861
WT	67	4666	3	3	TSeries-101952021-0947-076	4p_500 Hm1a	4	500	0	1	0.216711
WT	67	4666	3	3	TSeries-101952021-0947-076	4p_500 Hm1a	4	500	1	1	0.401522
WT	67	4666	3	3	TSeries-101952021-0947-076	4p_500 Hm1a	4	500	2	1	0.317917
WT	67	4666	3	3	TSeries-101952021-0947-076	4p_500 Hm1a	4	500	3	1	0.502093
WT	67	4666	3	3	TSeries-101952021-0947-076	4p_500 Hm1a	4	500	4	1	0.494315
WT	67	4666	3	3	TSeries-101952021-0947-076	4p_500 Hm1a	4	500	5	1	0.531013
WT	67	4666	3	3	TSeries-101952021-0947-076	4p_500 Hm1a	4	500	6	1	0.22238
WT	67	4666	3	3	TSeries-101952021-0947-076	4p_500 Hm1a	4	500	7	0
WT	67	4666	3	3	TSeries-101952021-0947-076	4p_500 Hm1a	4	500	8	1	0.320142
WT	67	4666	3	3	TSeries-101952021-0947-076	4p_500 Hm1a	4	500	9	1	0.344381
WT	67	4666	3	3	TSeries-101952021-0947-076	4p_500 Hm1a	4	500	10	1	0.30498
WT	67	4666	3	3	TSeries-101952021-0947-076	4p_500 Hm1a	4	500	11	1	0.339831
WT	67	4666	3	3	TSeries-101952021-0947-076	4p_500 Hm1a	4	500	12	1	0.274328
WT	67	4666	3	3	TSeries-101952021-0947-076	4p_500 Hm1a	4	500	13	1	0.173937
WT	67	4666	3	3	TSeries-101952021-0947-076	4p_500 Hm1a	4	500	14	1	0.225598
WT	67	4666	3	3	TSeries-101952021-0947-076	4p_500 Hm1a	4	500	15	1	0.127795
WT	67	4666	3	3	TSeries-101952021-0947-076	4p_500 Hm1a	4	500	16	0
WT	67	4666	3	3	TSeries-101952021-0947-076	4p_500 Hm1a	4	500	17	0
WT	67	4666	3	3	TSeries-101952021-0947-076	4p_500 Hm1a	4	500	18	0
WT	67	4666	3	3	TSeries-101952021-0947-076	4p_500 Hm1a	4	500	19	1	0.15238
WT	67	4666	3	3	TSeries-101952021-0947-076	4p_500 Hm1a	4	500	20	1	0.182199
WT	67	4666	3	3	TSeries-101952021-0947-076	4p_500 Hm1a	4	500	21	0
WT	67	4666	3	3	TSeries-101952021-0947-076	4p_500 Hm1a	4	500	22	0
WT	67	4666	3	3	TSeries-101952021-0947-076	4p_500 Hm1a	4	500	23	0
WT	67	4666	3	3	TSeries-101952021-0947-076	4p_500 Hm1a	4	500	24	0
WT	67	4666	3	3	TSeries-101952021-0947-076	4p_500 Hm1a	4	500	25	0
WT	67	4666	3	3	TSeries-101952021-0947-076	4p_500 Hm1a	4	500	26	0
WT	67	4666	3	3	TSeries-101952021-0947-076	4p_500 Hm1a	4	500	27	0
WT	67	4666	3	3	TSeries-101952021-0947-076	4p_500 Hm1a	4	500	28	1	0.178612
WT	67	4666	3	3	TSeries-101952021-0947-076	4p_500 Hm1a	4	500	29	0
WT	67	4666	3	3	TSeries-101952021-0947-076	4p_500 Hm1a	4	500	30	0
WT	67	4666	3	3	TSeries-101952021-0947-076	4p_500 Hm1a	4	500	31	0
WT	67	4666	3	3	TSeries-101952021-0947-076	4p_500 Hm1a	4	500	32	0
WT	67	4666	3	3	TSeries-101952021-0947-076	4p_500 Hm1a	4	500	33	0
WT	67	4666	3	3	TSeries-101952021-0947-076	4p_500 Hm1a	4	500	34	1	0.145795
WT	124	4533	1	1	TSeries-101952021-0947-081	4p_500 pre Hm1a	4	500	0	0
WT	124	4533	1	1	TSeries-101952021-0947-081	4p_500 pre Hm1a	4	500	1	0
WT	124	4533	1	1	TSeries-101952021-0947-081	4p_500 pre Hm1a	4	500	2	0
WT	124	4533	1	1	TSeries-101952021-0947-081	4p_500 pre Hm1a	4	500	3	0
WT	124	4533	1	1	TSeries-101952021-0947-081	4p_500 pre Hm1a	4	500	4	0
WT	124	4533	1	1	TSeries-101952021-0947-081	4p_500 pre Hm1a	4	500	5	0
WT	124	4533	1	1	TSeries-101952021-0947-081	4p_500 pre Hm1a	4	500	6	0
WT	124	4533	1	1	TSeries-101952021-0947-081	4p_500 pre Hm1a	4	500	7	0
WT	124	4533	1	1	TSeries-101952021-0947-081	4p_500 pre Hm1a	4	500	8	0
WT	124	4533	1	1	TSeries-101952021-0947-081	4p_500 pre Hm1a	4	500	9	0
WT	124	4533	1	1	TSeries-101952021-0947-081	4p_500 pre Hm1a	4	500	10	0
WT	124	4533	1	1	TSeries-101952021-0947-081	4p_500 pre Hm1a	4	500	11	0
WT	124	4533	1	1	TSeries-101952021-0947-081	4p_500 pre Hm1a	4	500	12	0
WT	124	4533	1	1	TSeries-101952021-0947-081	4p_500 pre Hm1a	4	500	13	0
WT	124	4533	1	1	TSeries-101952021-0947-081	4p_500 pre Hm1a	4	500	14	0
WT	124	4533	1	1	TSeries-101952021-0947-081	4p_500 pre Hm1a	4	500	15	0
WT	124	4533	1	1	TSeries-101952021-0947-081	4p_500 pre Hm1a	4	500	16	0
WT	124	4533	1	1	TSeries-101952021-0947-081	4p_500 pre Hm1a	4	500	17	0
WT	124	4533	1	1	TSeries-101952021-0947-081	4p_500 pre Hm1a	4	500	18	0
WT	124	4533	1	1	TSeries-101952021-0947-081	4p_500 pre Hm1a	4	500	19	0
WT	124	4533	1	1	TSeries-101952021-0947-081	4p_500 pre Hm1a	4	500	20	0
WT	124	4533	1	1	TSeries-101952021-0947-081	4p_500 pre Hm1a	4	500	21	0
WT	124	4533	1	1	TSeries-101952021-0947-081	4p_500 pre Hm1a	4	500	22	0
WT	124	4533	1	1	TSeries-101952021-0947-081	4p_500 pre Hm1a	4	500	23	0
WT	124	4533	1	1	TSeries-101952021-0947-081	4p_500 pre Hm1a	4	500	24	0
WT	124	4533	1	1	TSeries-101952021-0947-081	4p_500 pre Hm1a	4	500	25	0
WT	124	4533	1	1	TSeries-101952021-0947-081	4p_500 pre Hm1a	4	500	26	0
WT	124	4533	1	1	TSeries-101952021-0947-081	4p_500 pre Hm1a	4	500	27	0
WT	124	4533	1	1	TSeries-101952021-0947-081	4p_500 pre Hm1a	4	500	28	0
WT	124	4533	1	1	TSeries-101952021-0947-081	4p_500 pre Hm1a	4	500	29	0
WT	124	4533	1	1	TSeries-101952021-0947-081	4p_500 pre Hm1a	4	500	30	0
WT	124	4533	1	1	TSeries-101952021-0947-081	4p_500 pre Hm1a	4	500	31	0
WT	124	4533	1	1	TSeries-101952021-0947-081	4p_500 pre Hm1a	4	500	32	0
WT	124	4533	1	1	TSeries-101952021-0947-081	4p_500 pre Hm1a	4	500	33	1	0.139921
WT	124	4533	1	1	TSeries-101952021-0947-081	4p_500 pre Hm1a	4	500	34	0
WT	124	4533	1	1	TSeries-101952021-0947-081	4p_500 pre Hm1a	4	500	35	1	0.321759
WT	124	4533	1	1	TSeries-101952021-0947-081	4p_500 pre Hm1a	4	500	36	0
WT	124	4533	1	1	TSeries-101952021-0947-081	4p_500 pre Hm1a	4	500	37	0
WT	124	4533	1	1	TSeries-101952021-0947-081	4p_500 pre Hm1a	4	500	38	0
WT	124	4533	1	1	TSeries-101952021-0947-081	4p_500 pre Hm1a	4	500	39	0
WT	124	4533	1	1	TSeries-101952021-0947-081	4p_500 pre Hm1a	4	500	40	0
WT	124	4533	1	1	TSeries-101952021-0947-081	4p_500 pre Hm1a	4	500	41	1	0.184055
WT	124	4533	1	1	TSeries-101952021-0947-081	4p_500 pre Hm1a	4	500	42	0
WT	124	4533	1	1	TSeries-101952021-0947-081	4p_500 pre Hm1a	4	500	43	0
WT	124	4533	1	1	TSeries-101952021-0947-081	4p_500 pre Hm1a	4	500	44	0
WT	124	4533	1	1	TSeries-101952021-0947-081	4p_500 pre Hm1a	4	500	45	0
WT	124	4533	1	1	TSeries-101952021-0947-081	4p_500 pre Hm1a	4	500	46	0
WT	124	4533	1	1	TSeries-101952021-0947-081	4p_500 pre Hm1a	4	500	47	0
WT	124	4533	1	1	TSeries-101952021-0947-081	4p_500 pre Hm1a	4	500	48	0
WT	124	4666	1	1	TSeries-101952021-0947-086	4p_500 Hm1a	4	500	0	0
WT	124	4666	1	1	TSeries-101952021-0947-086	4p_500 Hm1a	4	500	1	0
WT	124	4666	1	1	TSeries-101952021-0947-086	4p_500 Hm1a	4	500	2	0
WT	124	4666	1	1	TSeries-101952021-0947-086	4p_500 Hm1a	4	500	3	0
WT	124	4666	1	1	TSeries-101952021-0947-086	4p_500 Hm1a	4	500	4	0
WT	124	4666	1	1	TSeries-101952021-0947-086	4p_500 Hm1a	4	500	5	0
WT	124	4666	1	1	TSeries-101952021-0947-086	4p_500 Hm1a	4	500	6	1	0.107141
WT	124	4666	1	1	TSeries-101952021-0947-086	4p_500 Hm1a	4	500	7	0
WT	124	4666	1	1	TSeries-101952021-0947-086	4p_500 Hm1a	4	500	8	0
WT	124	4666	1	1	TSeries-101952021-0947-086	4p_500 Hm1a	4	500	9	0
WT	124	4666	1	1	TSeries-101952021-0947-086	4p_500 Hm1a	4	500	10	0
WT	124	4666	1	1	TSeries-101952021-0947-086	4p_500 Hm1a	4	500	11	0
WT	124	4666	1	1	TSeries-101952021-0947-086	4p_500 Hm1a	4	500	12	0
WT	124	4666	1	1	TSeries-101952021-0947-086	4p_500 Hm1a	4	500	13	0
WT	124	4666	1	1	TSeries-101952021-0947-086	4p_500 Hm1a	4	500	14	0
WT	124	4666	1	1	TSeries-101952021-0947-086	4p_500 Hm1a	4	500	15	0
WT	124	4666	1	1	TSeries-101952021-0947-086	4p_500 Hm1a	4	500	16	0
WT	124	4666	1	1	TSeries-101952021-0947-086	4p_500 Hm1a	4	500	17	0
WT	124	4666	1	1	TSeries-101952021-0947-086	4p_500 Hm1a	4	500	18	0
WT	124	4666	1	1	TSeries-101952021-0947-086	4p_500 Hm1a	4	500	19	0
WT	124	4666	1	1	TSeries-101952021-0947-086	4p_500 Hm1a	4	500	20	0
WT	124	4666	1	1	TSeries-101952021-0947-086	4p_500 Hm1a	4	500	21	0
WT	124	4666	1	1	TSeries-101952021-0947-086	4p_500 Hm1a	4	500	22	0
WT	124	4666	1	1	TSeries-101952021-0947-086	4p_500 Hm1a	4	500	23	0
WT	124	4666	1	1	TSeries-101952021-0947-086	4p_500 Hm1a	4	500	24	0
WT	124	4666	1	1	TSeries-101952021-0947-086	4p_500 Hm1a	4	500	25	0
WT	124	4666	1	1	TSeries-101952021-0947-086	4p_500 Hm1a	4	500	26	0
WT	124	4666	1	1	TSeries-101952021-0947-086	4p_500 Hm1a	4	500	27	0
WT	124	4666	1	1	TSeries-101952021-0947-086	4p_500 Hm1a	4	500	28	0
WT	124	4666	1	1	TSeries-101952021-0947-086	4p_500 Hm1a	4	500	29	0
WT	124	4666	1	1	TSeries-101952021-0947-086	4p_500 Hm1a	4	500	30	0
WT	124	4666	1	1	TSeries-101952021-0947-086	4p_500 Hm1a	4	500	31	0
WT	124	4666	1	1	TSeries-101952021-0947-086	4p_500 Hm1a	4	500	32	0
WT	124	4666	1	1	TSeries-101952021-0947-086	4p_500 Hm1a	4	500	33	0
WT	124	4666	1	1	TSeries-101952021-0947-086	4p_500 Hm1a	4	500	34	0
WT	124	4666	1	1	TSeries-101952021-0947-086	4p_500 Hm1a	4	500	35	0
WT	124	4666	1	1	TSeries-101952021-0947-086	4p_500 Hm1a	4	500	36	0
WT	124	4666	1	1	TSeries-101952021-0947-086	4p_500 Hm1a	4	500	37	0
WT	124	4666	1	1	TSeries-101952021-0947-086	4p_500 Hm1a	4	500	38	0
WT	124	4666	1	1	TSeries-101952021-0947-086	4p_500 Hm1a	4	500	39	0
WT	124	4666	1	1	TSeries-101952021-0947-086	4p_500 Hm1a	4	500	40	0
WT	124	4666	1	1	TSeries-101952021-0947-086	4p_500 Hm1a	4	500	41	0
WT	124	4666	1	1	TSeries-101952021-0947-086	4p_500 Hm1a	4	500	42	0
WT	124	4666	1	1	TSeries-101952021-0947-086	4p_500 Hm1a	4	500	43	0
WT	124	4666	1	1	TSeries-101952021-0947-086	4p_500 Hm1a	4	500	44	0
WT	124	4666	1	1	TSeries-101952021-0947-086	4p_500 Hm1a	4	500	45	0
WT	124	4666	1	1	TSeries-101952021-0947-086	4p_500 Hm1a	4	500	46	0
WT	124	4666	1	1	TSeries-101952021-0947-086	4p_500 Hm1a	4	500	47	0
WT	124	4666	1	1	TSeries-101952021-0947-086	4p_500 Hm1a	4	500	48	0
