# Supplementary material for: Corticohippocampal circuit dysfunction in a mouse model of Dravet syndrome
Source: eLife. 2022 Feb 25;11:e69293. doi: 10.7554/eLife.69293 (PMC8920506; doi:10.7554/eLife.69293)
Supplement: Figure 4—source data 2. [file elife-69293-fig4-data2.xlsx]

## Sheet: data by field
Genotype	age	mouse	slice	field	File name	condition	pulses	power	Total Cells	Activated Cells	Percentage Activated	Average Amplitude
Scn1a	66	4662	2	2	TSeries-101852021-1121-011	4p_500 pre Hm1a	4	500	41	40	97.561	0.764471
Scn1a	66	4662	2	2	TSeries-101852021-1121-016	4p_500 Hm1a	4	500	41	40	97.561	0.825037
Scn1a	66	4662	3	3	TSeries-101852021-1121-021	4p_500 pre Hm1a	4	500	73	57	78.0822	0.400939
Scn1a	66	4662	3	3	TSeries-101852021-1121-026	4p_500 Hm1a	4	500	73	34	46.5753	0.342252
Scn1a	66	4662	4	4	TSeries-101852021-1121-031	4p_500 pre Hm1a	4	500	62	29	46.7742	0.360857
Scn1a	66	4662	4	4	TSeries-101852021-1121-036	4p_500 Hm1a	4	500	62	45	72.5806	0.349471
Scn1a	66	4662	5	5	TSeries-101852021-1121-041	4p_500 pre Hm1a	4	500	50	30	60	0.353186
Scn1a	66	4662	5	5	TSeries-101852021-1121-046	4p_500 Hm1a	4	500	50	46	92	0.269745
Scn1a	68	4667	1	1	TSeries-10202021-1441-021	4p_500 pre Hm1a	4	500	62	62	100	1.1626
Scn1a	68	4667	1	1	TSeries-10202021-1441-026	4p_500 Hm1a	4	500	62	61	98.3871	1.10294
Scn1a	68	4667	2	2	TSeries-10202021-1441-031	4p_500 pre Hm1a	4	500	47	47	100	0.351889
Scn1a	68	4667	2	2	TSeries-10202021-1441-036	4p_500 Hm1a	4	500	47	45	95.7447	0.374912
WT	67	4663	1	1	TSeries-101952021-0947-001	4p_500 pre Hm1a	4	500	61	7	11.4754	0.295391
WT	67	4663	1	1	TSeries-101952021-0947-006	4p_500 Hm1a	4	500	61	12	19.6721	0.294107
WT	67	4663	2	2	TSeries-101952021-0947-011	4p_500 pre Hm1a	4	500	71	7	9.85915	0.214481
WT	67	4663	2	2	TSeries-101952021-0947-016	4p_500 Hm1a	4	500	71	18	25.3521	0.409871
WT	67	4663	3	3	TSeries-101952021-0947-021	4p_500 pre Hm1a	4	500	70	3	4.28571	0.326406
WT	67	4663	3	3	TSeries-101952021-0947-026	4p_500 Hm1a	4	500	70	11	15.7143	0.232015
WT	67	4663	4	4	TSeries-101952021-0947-031	4p_500 pre Hm1a	4	500	59	44	74.5763	0.366213
WT	67	4663	4	4	TSeries-101952021-0947-036	4p_500 Hm1a	4	500	59	24	40.678	0.359734
WT	67	4666	1	1	TSeries-101952021-0947-051	4p_500 pre Hm1a	4	500	47	19	40.4255	0.304699
WT	67	4666	1	1	TSeries-101952021-0947-056	4p_500 Hm1a	4	500	47	30	63.8298	0.265572
WT	67	4666	2	2	TSeries-101952021-0947-061	4p_500 pre Hm1a	4	500	73	29	39.726	0.232753
WT	67	4666	2	2	TSeries-101952021-0947-066	4p_500 Hm1a	4	500	73	19	26.0274	0.189579
WT	67	4666	3	3	TSeries-101952021-0947-071	4p_500 pre Hm1a	4	500	35	17	48.5714	0.271995
WT	67	4666	3	3	TSeries-101952021-0947-076	4p_500 Hm1a	4	500	35	19	54.2857	0.287154
WT	124	4533	1	1	TSeries-101952021-0947-081	4p_500 pre Hm1a	4	500	49	3	6.12245	0.215245
WT	124	4666	1	1	TSeries-101952021-0947-086	4p_500 Hm1a	4	500	49	1	2.04082	0.107141
