# Supplementary material for: Corticohippocampal circuit dysfunction in a mouse model of Dravet syndrome
Source: eLife. 2022 Feb 25;11:e69293. doi: 10.7554/eLife.69293 (PMC8920506; doi:10.7554/eLife.69293)
Supplement: Figure 5—source data 1. [file elife-69293-fig5-data1.xlsx]

## Sheet: EPSC_IPSC peak
	Current
Scn1a	25	1.10768	0.845278	0.213774	0.0600648	0.101478
	50	0.0879715	0.0404918	1.0834	1.9416	0.141626	0.178807	2.68628	0.383166	0.328511	0.154693	0.131351
	100	0.1986	0.261885	0.0754055	0.493608	0.574622	1.29611	2.25985	3.10992	0.998729	0.811901	0.761567	2.34553	0.252809
	200	1.30321	1.16932	0.350858	1.65681	2.81233	1.77389	1.6464	0.983348	0.423776	0.509795	0.351847
	300	1.49563	2.86311	2.59702	1.51601	1.13009	0.572898	1.02229	0.512278
	400	2.13266	1.93001	3.55983	3.55677	1.66059	1.36383	0.567605	1.02201	0.519311
	500	2.09684	4.12781	3.68863	1.54424	1.36069	0.559213	1.1383	0.71052
WT	25	0.241182	0.186109	0.162443	0.229899
	50	0.305459	0.281384	2.34229	0.0815267	0.410209	0.149983	0.252662	0.170102	0.193746	0.150204	0.257892
	100	0.42966	0.425155	0.440712	0.494164	0.378136	0.0833835	0.191933	0.366746	0.479949	0.182954	0.286695	0.252349	0.140822	0.823149	1.26794
	200	0.865522	0.710889	0.959314	1.03024	0.340812	0.481039	0.668677	0.193262	0.424688	0.241826	0.161631	0.353925	1.1228	0.276096	0.423799
	300	1.56067	1.03303	1.45542	1.1896	0.383434	0.591665	0.795989	0.238349	0.598148	0.376185	0.274682	0.462201	1.3296	0.498704	0.578073
	400	2.3103	1.22714	1.59171	2.0772	0.573466	1.08031	0.882885	0.304633	0.639618	0.365421	0.378395	0.56053	1.08264	0.794841	0.495803
	500	2.36738	1.26944	0.912826	1.12435	0.79032	0.968296	0.793173	0.359953	0.687112	0.370807	0.430465	0.609443	1.42832	1.05839	0.450852

## Sheet: EPSC peak
	Current
Scn1a	25	98.285	169.92	19.458	5.5564	17.082	0	0	0	0	0	0	0	0
	50	9.9671	5.7372	149.99	114.97	34.615	18.605	201.02	290.87	110.71	32.098	37.641	0	0
	100	13.847	25.282	55.338	62.245	168.9	663.72	924.02	302.3	559.92	268.73	128.2	131.86	100.87
	200	138.06	318.52	288.24	783.05	1202.6	593.81	885.46	528.55	317.47	410.66	370.68
	300	817.85	1747	1039.8	1058	663.57	457.05	601.65	396.57
	400	230.44	885.03	1910.9	983	1017.4	653.4	602.93	669.36	477.03
	500	866.31	2043	824	1078.5	635.73	610.88	691.07	449.55
WT	25	20.795	3.7263	23.704	9.8592	8.0348	13.851	0	0	0	0	0	0	0	0	0	0
	50	10.374	24.218	41.609	9.2825	23	22.575	160.1	26.269	16.467	17.245	34.077	11.162	0	0	0	0
	100	32.304	47.421	111.38	416.78	53.069	14.41	54.48	137.67	43.61	16.539	14.4	67.229	70.699	49.96	44.314	31
	200	87.299	107.45	168.65	753.08	68.235	144.74	271.07	60.863	471.44	347.14	107.52	71.792	153.62	36.453	97.93
	300	136.83	149.88	273.94	969.94	87.597	254.71	498.74	86.451	611.21	492.02	154.65	84.482	229.08	51.622	143.39
	400	232.46	176.03	278.49	1392.8	120.05	326.92	488.71	140.44	773.85	573.21	285.17	138.25	327.3	98.159	134.17
	500	242.24	202.62	154.22	976.62	174.55	387.65	516.51	152.43	748.89	502	251.32	150.7	360.69	133.4	124.82

## Sheet: IPSC peak
	Current
Scn1a	25	22.9282	63.3388	66.8441	27.8038	88.7312	201.023	52.9849	91.0209	92.5067	168.333	56.2177	0	0	0
	50	62.9754	113.299	127.633	141.688	74.8307	759.112	59.2115	337	350.774	207.497	138.44	286.567	244.411	104.053
	100	69.7221	126.101	96.5387	293.927	733.878	190.752	512.086	408.885	97.2039	560.631	330.984	424.872	582.319	399.011
	200	105.938	272.398	821.528	472.624	427.624	334.75	537.815	537.497	749.139	805.533	1053.52
	300	1044.27	546.827	610.176	400.382	697.879	587.186	797.787	588.529	774.124
	400	108.052	458.561	536.784	276.374	612.7	479.095	1062.23	654.947	918.577
	500	413.15	494.935	223.389	698.383	467.21	1092.39	607.112	632.705
WT	25	9.93219	41.7596	86.2228	20.022	24.4796	31.9753	60.6936	34.9492	0	0	0	0	0	0	0
	50	86.0682	150.519	633.672	84.9951	113.858	33.9604	17.7641	50.2276	56.069	154.433	55.7768	43.3675	114.811	32.12	132.137
	100	75.1847	111.539	252.716	843.403	140.345	283.849	375.379	104.263	266.411	502.049	172.818	124.77	90.8629	90.4005	205.793
	200	100.863	151.151	175.8	730.973	200.213	300.891	405.377	314.925	1110.09	1435.47	665.239	202.844	136.816	132.031	231.076
	300	87.6709	145.089	188.219	815.35	228.454	430.499	626.57	362.708	1021.84	1307.92	563	182.783	172.293	103.512	248.054
	400	100.621	143.449	174.96	670.503	209.34	302.619	553.532	461.021	1209.86	1568.63	753.626	246.637	302.319	123.496	270.612
	500	102.325	159.614	168.949	868.605	220.864	400.347	651.191	423.462	1089.91	1353.8	583.83	247.274	252.529	126.045	276.859

## Sheet: 2nd_1st EPSC peak
	Current
Scn1a	100	0.624466	1.24001	1.85565	1.11172	1.10967	0.687967	0.706007	0.812506	0.877089	0.954058	1.14936	1.40922	1.68277
	200	1.0255	1.21425	1.37037	0.71817	0.703585	0.74344	0.77073	0.954916	1.19269	1.12967	1.03882
	300	0.743754	0.669771	0.568807	0.878656	0.921306	1.01846	0.995043	1.1008
	400	0.969859	0.742234	0.664514	0.638682	0.842135	0.827441	0.981013	1.00999	0.956193
WT	100	1.34344	1.1794	1.05937	1.25873	1.51848	1.62296	1.2245	1.51019	1.12226	1.14405	0.960244	1.46159	1.55914	1.42586	1.4379
	200	1.09582	1.12321	1.1945	1.0899	1.6936	1.48504	1.23866	1.08139	1.26321	1.1803	1.14592	1.54899	0.697726	1.25927	1.2068
	300	0.982216	1.14114	1.02885	1.02179	1.64823	1.23531	1.07099	1.40023	1.1237	1.16654	1.24072	1.35235	0.813177	1.07623	1.1856
	400	0.941321	1.12143	0.945346	0.826675	1.38134	1.13263	1.21677	1.03139	1.0547	1.07552	1.10419	1.18921	0.911434	1.11721	1.17464

## Sheet: 4th_1st EPSC peak
	Current
Scn1a	100	0.43669	1.20073	1.84863	0.778896	0.618927	0.454705	0.470807	0.567441	0.649158	0.911321	0.999641	1.29247	1.37876
	200	0.686752	0.741022	1.07773	0.473272	0.443456	0.408748	0.472794	0.752331	0.911539	0.954372	0.927036
	300	0.47904	0.410846	0.396677	0.614866	0.733058	0.849457	0.832145	0.985606
	400	0.696538	0.499944	0.41115	0.406509	0.561588	0.695726	0.757655	0.87524	0.834047
WT	100	0.944044	0.937123	0.619476	0.853793	1.09265	1.83718	1.13578	0.90346	0.566621	0.921615	1.09938	1.3646	1.25598	1.02174	1.46665
	200	0.885331	0.82766	0.745823	0.744263	1.35597	1.07257	1.0165	0.668284	0.943221	0.949622	0.913847	0.944891	0.398411	0.845039	0.98828
	300	0.812606	0.916375	0.614116	0.754851	1.08021	0.881253	0.734772	1.00378	0.908801	0.956734	0.98767	1.13709	0.388321	0.88614	0.924306
	400	0.729401	0.794829	0.644716	0.568034	0.983622	0.846391	0.771165	1.06446	0.901244	0.956049	0.800281	0.798258	0.576657	0.744896	0.929656

## Sheet: puffed glutamate
	puff duration
Scn1a	5 ms	-705.221	-311.875	-121.631	-335.234	-200.041	-15.9766	-161.498	-258.807	-225.236	-17.9945	-103.608	-126.123	-46.8375	-25.9149	-62.7356	-16.0277	-17.9419	-17.8892	-21.6777	-28.7087	-33.4349	-151.002
	10 ms	-802.227	-518.264	-162.95	-385.148	-340.447	-356.702	-187.284	-321.526	-302.281	-35.017	-124.796	-137.392	-148.804	-33.8129	-139.177	-13.9833	-205.84	-32.1818	-42.1345	-39.6685	-36.8228	-67.7253	-241.165
	30 ms	-1017.42	-1592.71	-762.774	-196.667	-358.928	-145.363	-220.3	-368.316	-493.832	-222.313	-154.343	-149.206	-766.216	-49.2341	-101.592	-340.512	-55.3204	-305.083	-113.771	-38.4481	-150.139	-167.578	-36.7119	-160.864	-220.551
WT	5 ms	-278.643	-77.2869	-25.9915	-76.5803	-54.8887	-436.145	-14.1987	-14.7433	-20.4352	-238.021	-98.6979	-63.6821	-32.2354	-109.931	-122.601	-37.5403
	10 ms	-305.314	-99.7931	-136.253	-108.679	-468.934	-499.147	-19.1945	-18.4383	-312.489	-363.566	-256.63	-20.9069	-344.138	-17.6284	-234.442	-74.6222	-59.5048	-264.982	-157.357	-54.8255	-150.039	-99.0359
	30 ms	-362.769	-101.478	-144.24	-144.356	-524.803	-856.345	-439.619	-126.749	-451.628	-559.925	-371.572	-21.4281	-449.899	-172.538	-267.773	-275.446	-412.22	-341.124	-225.589	-79.1841	-176.606	-188.281

## Sheet: threshold
Scn1a	EPSC threshold	50	50	75	50	80	25	25	25	50	20	20	25	50	50
	IPSC threshold	25	25	25	20	30	25	20	45	25	20	20	25	25	50
WT	EPSC threshold	35	40	25	25	25	25	50	50	75	50	75	100	25	90	80	25
	IPSC threshold	40	25	40	25	25	25	25	50	25	50	50	50	15	50	70	20
