# Supplementary material for: Corticohippocampal circuit dysfunction in a mouse model of Dravet syndrome
Source: eLife. 2022 Feb 25;11:e69293. doi: 10.7554/eLife.69293 (PMC8920506; doi:10.7554/eLife.69293)
Supplement: Figure 5—source data 2. [file elife-69293-fig5-data2.xlsx]

## Sheet: EPSC_IPSC peak
	Current
Scn1a	100	0.847627	0.226282	1.72412	0.206036	2.7376	0.17998	0.170928	0.903415	1.56383	0.0742435	0.166599	1.27846	0.225424	0.140593	0.698307	0.310805	1.0522	0.856381	1.47489	0.152249	0.599684	1.24456	0.7818	2.86148
	200	0.281695	1.9424	0.552456	0.722706	0.155	0.723682	0.0851274	0.414989	1.0041	0.961628	0.203335	0.30461	0.512306	1.16263	0.537313	0.692501	0.132729	0.873983	0.404889	0.783181	4.39754	1.05743	0.361567	0.541867	1.3779	0.633678	2.173	1.76894
	300	0.697814	0.0850971	2.79829	1.81193	1.4846	0.572773	0.198615	0.583396	0.0944332	0.451876	1.61115	1.13089	0.406029	0.475478	1.2474	1.10242	0.897141	0.976679	0.312626	1.00678	0.503454	4.33573	1.54849	0.424027	0.281827	1.9366	0.440387	1.03812	1.2636
	400	0.649306	0.259044	2.49733	1.36755	1.44278	0.516835	0.402624	0.744361	0.107748	0.51768	1.40022	0.771815	0.750229	0.878847	1.19087	1.34084	1.27712	1.15377	1.34283	0.480459	1.50098	0.450593	0.382706	0.345721	1.3439	0.507539	0.694797
WT	100	1.56488	2.19244	0.862897	0.139532	0.292403	0.918446	1.19916	0.388865	0.642404	0.881047	0.143916	0.287047	0.246167	0.376936
	200	0.876563	0.947686	0.998304	0.514539	0.413239	0.433209	0.967501	0.741564	0.866473	0.483931	0.698208	1.53269	0.801766	0.424415	0.160278	0.114364	0.761201	2.14904
	300	1.78863	0.770516	1.45696	0.972939	1.75634	0.613913	0.915218	0.65882	0.812625	0.62201	0.715775	0.234882	0.668398	2.20167
	400	1.92721	1.25134	1.52793	0.462239	1.7703	0.595552	0.956098	0.79658	0.428375	1.54146	0.780932	1.74192	0.509905	1.09517	2.55507

## Sheet: EPSC peak
	Current
Scn1a	50	37.6297	8.78777	0	0	30.9199	0	5.98896	0	7.69775	0	0	16.0951	295.599	92.0475	5.64444	75.8262	76.3334	95.1537	0	0	0	0	0	0	0	0	0	0	0	0	0	0	0	0
	100	93.0297	23.1631	0	0	104.93	0	17.3523	18.7548	18.727	0	0	58.0735	548.996	204.164	11.7234	75.5975	170.652	127.383	21.4643	44.5954	22.0172	88.7196	0	0	34.3127	0	45.6622	0	8.45807	15.974	17.8554	25.0529	51.8247	0
	200		184.675	0	9.33467	149.121	10.3155	68.756	39.4		80.6591	14.0712	172.582	733.298			112.042		222.386	114.013	191.848	96.5993	350.113	24.3538	74.2118	58.8385	64.9987	169.225	30.272	124.261	60.7064	49.4503	43.1684	157.576	25.7009
	300		358.718	21.6703	16.9308	216.297	75.7344	80.2681	87.4681	94.1335		21.6917	178.582	1012.23			218.595		368.815	313.858	289.469	193.518	596.027	58.9026		145.593	70.7347	262.972	31.3405	274.149	101.607	126.647	144.312	342.609	66.9706
	400		376.994	75.3657	18.3284	210.714	127.212	104.439	156.619	183.544		24.4879	200.812	914.283			374.013		662.283	446.386	410.482	308.965	906.884	105.843		309.31	68.6744	307.674	43.7923	275.991	133.428	146.105	176.184	344.973
WT	50	13.5176	7.70139	19.8294	58.0206	0	0	9.65332	7.25637	32.8589	0	9.38986	0	11.6457	0	10.8492	0	5.98009	0	0	0	0	0	0
	100	55.793	53.1049	41.3493	72.8948	6.8494	0	28.4267	17.975	104	0	15.9122	9.39912	51.0706	33.4847	16.633	58.3829	42.0066	0	0	0	0	14.0773	14.3718
	200	195.364	397.684	436.642	150.534	19.1406	24.0153	142.885	119.833		125.766	12.3836	30.6027	154.681	119.969	129.687	166.479	103.396	16.7743	0	7.1944	0	76.4092	65.4787
	300	396.659	508.103	578.577		36.9867	12.6324	267.223	228.176		94.0517	16.2544	128.01	358.112	153.213		120.901	160.936	102.054	86.7723	19.0267	9.85083		158.778
	400	432.551	967.003	710.746		43.6	14.2319	377.252	204.836		159.182	18.5642	296.284	589.344	322.153		113.384	211.477	309.6		60.8602	12.0084		211.708

## Sheet: IPSC peak
	Current
Scn1a	50	44.6254	0	30.9583	0	0	0	28.676	0	0	0	267.322	351.594	45.7717	48.6343	188.331	123.135	280.796	0	0	0	0	29.3195	20.2709	0	0	0	0	0	0	0	0	0
	100	109.753	102.364	146.612	0	60.8598	0	84.2199	6.85083	104.051	23.6953	339.753	607.689	130.554	157.904	453.77	133.483	565.082	152.67	63.8622	70.839	84.3183	149.101	40.0672	21.0521	30.9598	20.2394	55.5543	26.6373	14.3467	32.0452	18.1112	12.4628
	200	356.355	655.585	254.653	0	76.7714	18.672	95.137	253.127	111.457	165.295	415.87	730.304	286.951	184.349	551.02	153.838	730.07	222.548	165.012	179.782	505.577	183.486	145.32	82.9932	38.4818	28.628	343.674	112.032	35.888	68.1236	72.5154	14.529
	300		514.059	290.938	6.05041	119.374	51.0134	140.139	440.39	161.354	229.704	395.202	628.269			538.373		775.674	251.609	262.575	215.706	610.259	188.413	144.613	140.499	60.6523	87.5652	646.537	360.531	65.3968	327.693	330.028	52.9998
	400		580.611		7.33919	154.081	88.1713	202.074	388.997	246.579	227.271	387.908	652.957			498.531		753.581	374.839	306.137	241.923	786.02		230.342	142.935	204.982	97.1881	721.157	385.942	108.717	347.134	496.509
WT	50	0	0	0	11.3734	0	0	57.0444	16.2848	0	29.3315	0	0	28.9652	0	21.5329	43.8317	0	9.05219	0	21.0939	14.141
	100	0	0	18.86	84.4768	49.0885	0	97.2174	19.5711	86.7277	78.252	0	24.1706	79.4992	38.0056	115.574	146.341	99.746	22.7863	0	96.752	88.7392
	200	222.875	419.637	437.383	292.56	46.3185	0	329.828	123.858	153.928	145.147	25.5895	43.8303	100.922	32.4743	161.752	243.62	207.408	127.852	28.3881	250.542	120.194
	300	221.767	659.432	397.113		38.0154	7.1925	435.279	249.314		142.758	20.0024					258.735	358.89	254.476	37.7481	229.441	153.855
	400	224.444	772.775	465.17		94.3236	8.03922	633.449	214.242		199.832	43.3364			208.993		270.801	388.755	280.865	44.3215		181.508

## Sheet: 2nd_1st EPSC peak
	Current
Scn1a	100	1.32792	1.52607	1.05975	1.14619	0.702537	1.5174	1.90747	1.22696	1.1851	1.0902	1.19909	1.24096	1.50704	1.2002	1.09023	1.45085	1.58096	0.829517	1.2375	1.09082	1.44082	1.94586	1.64234	1.29129
	200	1.14763	2.00308	1.10549	1.20667	1.02497	0.597087	0.732036	1.67003	1.32658	1.11639	0.873022	1.30553	1.346	1.99087	1.19758	1.43551	1.3983	0.84048	1.02777	1.27413	0.847643	0.931125	0.762182	1.3409	1.3859	1.20812	0.899831	1.20681	0.44519
	300	0.794247	1.81297	0.788047	0.947256	1.25577	1.25493	0.935696	1.37352	1.80689	1.46239	0.960306	0.875699	0.983915	1.04085	1.44331	1.33834	1.24544	0.989484	1.18853	1.14686	1.12845	1.02937	1.28534	1.30233	1.14089	0.758678	0.7116	1.13889	0.939125
	400	0.978706	1.47011	1.02896	0.764017	1.26793	1.01145	0.76364	1.08583	2.21539	1.35167	0.968884	0.835748	0.96019	0.961365	1.38524	1.35966	1.04908	0.956209	1.02294	0.813935	0.879118	1.04734	1.40831	1.24879	0.849005	0.896416	0.803194	1.21001
WT	100	0.659096	0.765211	0.79609	1.07729	1.74523	1.79444	1.48793	0.836538		1.15178	1.13672	1.30799	1.56406	2.62953	1.39363	1.66636	1.31128	1.07218
	200	0.759195	0.568999	0.581395	0.725574	0.8015	0.600306	1.14453	0.88334	1.35391	1.04027	1.33019	1.11952	1.37871	1.1186	1.32706	1.34208	1.69798	1.31435	1.32176	1.36176	1.37955
	300	0.641951	0.722965	0.577301	0.797023	0.891977	1.25848	0.937323	1.90203	0.762028	0.963019	0.984066	1.16259	1.39833	1.27611	1.24227	1.72546	1.30471	1.85119	1.48757	1.31289
	400	0.78159	0.600344	0.653499	0.574077	0.786803	0.932013	0.99964	1.4936	2.45203	0.81435	0.820901	0.941673	1.72225	1.40772	1.32612	1.19605	1.56173	1.72983	1.31861

## Sheet: 4th_1st EPSC peak
	Current
Scn1a	100	1.35394	1.12304	0.636719	0.818895	0.453211	1.08576	1.81002	0.884233	0.84821	1.20519	1.05727	0.94581	1.16532	0.957037	0.811502	1.15908	1.4223	0.749804	0.786561	1.70095	1.61792	1.06946	0.896053	0.95113
	200	0.615325	1.97693	0.581984	1.13249	0.642024	0.369774	0.606263	1.80819	1.17099	0.845198	0.679326	1.14006	0.992613	1.68422	0.891688	0.995383	0.966366	0.715453	0.568351	0.768794	0.59318	0.659596	0.55058	1.19092	1.12896	1.02707	0.442705	0.965846	0.401673
	300	0.555608	1.24248	0.700311	0.451191	0.743604	0.909468	0.48941	1.01227	2.24425	1.28819	0.717033	0.640372	0.840025	0.824409	1.31046	0.934852	0.77544	0.83088	1.25037	0.634554	0.63088	0.816031	0.980144	1.03559	0.631753	0.647949	0.551216	0.927041	0.723779
	400	0.559445	1.03632	0.764881	0.567701	0.706804	0.832521	0.439976	0.803448	2.28559	1.20263	0.762632	0.635324	0.795268	0.724651	1.08756	0.871331	0.680871	0.663851	1.11832	0.512964	0.419351	0.887222	1.72084	1.12676	0.481208	0.558927	0.473923	0.779679
WT	100	0.346361	0.415771	0.446608	0.985612	2.51781	1.33126	2.84841	0.519231		0.778178	1.14232	0.906314	1.24425	1.6333	1.05471	1.4489	1.5298	1.35634
	200	0.264341	0.24651	0.297008	0.635631	0.809271	0.29237	1.17152	0.817076	1.11808	0.831289	0.907644	0.720426	0.709067	0.627302	1.50515	0.928153	1.29072	1.03746		1.0929	1.28001
	300	0.433753	0.424068	0.336449	0.632045	0.7306	1.08753	0.747993	2.05037	1.08233	0.649065	0.529373	0.637544	1.10621	0.860103	1.14418	1.30542	1.03727	2.1994	1.12759	0.99506
	400	0.353211	0.355208	0.347125	0.538117	0.735178	0.714688	0.737195	1.5155	1.37503	0.47843	0.457013	0.488648	1.53768	0.926661	1.22026	0.975319	1.64963	1.68485	1.12491
