# Supplementary material for: Corticohippocampal circuit dysfunction in a mouse model of Dravet syndrome
Source: eLife. 2022 Feb 25;11:e69293. doi: 10.7554/eLife.69293 (PMC8920506; doi:10.7554/eLife.69293)
Supplement: Figure 6—source data 1. [file elife-69293-fig6-data1.xlsx]

## Sheet: seizure threshold
Scn1a ChR2	Scn1a YFP	WT ChR2
39	41.4	no seizure
40.3	41.9	no seizure
38.7	41.8	no seizure
37.1	42	42.3
38.3	41.7	42.3
39	41.3

## Sheet: time to seizure
Scn1a ChR2	Scn1a YFP	WT ChR2
4	9	no seizure
12	13	no seizure
7	10	no seizure
6	13	13
7	12	11
8	11
