# Supplementary material for: Corticohippocampal circuit dysfunction in a mouse model of Dravet syndrome
Source: eLife. 2022 Feb 25;11:e69293. doi: 10.7554/eLife.69293 (PMC8920506; doi:10.7554/eLife.69293)
Supplement: Figure 7—source data 1. [file elife-69293-fig7-data1.xlsx]

## Sheet: seizure threshold - day 1
Scn1a CNO	Scn1a vehicle	WT CNO
38.5	41.7	no seizure
40.7	42	no seizure
38.1	41	no seizure
41.5	42.2	no seizure
40.3	41.3	no seizure
41.5	42.7	no seizure
39.2

## Sheet: seizure threshold - within mice
Scn1a CNO	Scn1a vehicle
38.5	39.5
41.2	41.7
37.5	42
40.7	41.9
41.2	41
38.1	39.4
41.5	42.2
40.6	42.2
40.6	41.3
41.5	41
41.4	42.7
39.2	42.9

## Sheet: seizure threshold - CNO control
Scn1a CNO	Scn1a vehicle
42.2	41.3
42.4	42.3
42.3	42.2
42.2	42
41.9	42.2
42.5	42.5
41.2	41.1
41.7	41.1
