# Supplementary material for: Corticohippocampal circuit dysfunction in a mouse model of Dravet syndrome
Source: eLife. 2022 Feb 25;11:e69293. doi: 10.7554/eLife.69293 (PMC8920506; doi:10.7554/eLife.69293)
Supplement: Figure 8—source data 1. [file elife-69293-fig8-data1.xlsx]

## Sheet: PV
Genotype	age	mouse	slice	field	File name	stim type	pulses	power	Cell Num	Activation	Amplitude
Scn1a-PV	69	2871	1	1	TSeries-10292019-1106-017	electrical	1	500	0	1	0.0773227
Scn1a-PV	69	2871	1	1	TSeries-10292019-1106-017	electrical	1	500	1	1	0.37309
Scn1a-PV	69	2871	1	1	TSeries-10292019-1106-017	electrical	1	500	2	0
Scn1a-PV	69	2871	1	1	TSeries-10292019-1106-017	electrical	1	500	3	1	0.150828
Scn1a-PV	69	2871	1	1	TSeries-10292019-1106-017	electrical	1	500	4	1	0.262911
Scn1a-PV	69	2871	1	1	TSeries-10292019-1106-017	electrical	1	500	5	1	0.188358
Scn1a-PV	69	2871	1	1	TSeries-10292019-1106-017	electrical	1	500	6	1	0.416075
Scn1a-PV	69	2871	1	1	TSeries-10292019-1106-017	electrical	1	500	7	1	0.452378
Scn1a-PV	69	2871	1	1	TSeries-10292019-1106-017	electrical	1	500	8	1	0.158778
Scn1a-PV	69	2871	1	1	TSeries-10292019-1106-017	electrical	1	500	9	1	0.478965
Scn1a-PV	69	2871	1	1	TSeries-10292019-1106-017	electrical	1	500	10	1	0.285976
Scn1a-PV	69	2871	1	1	TSeries-10292019-1106-017	electrical	1	500	11	1	0.485002
Scn1a-PV	69	2871	1	1	TSeries-10292019-1106-017	electrical	1	500	12	1	0.353402
Scn1a-PV	69	2871	1	1	TSeries-10292019-1106-017	electrical	1	500	13	1	0.362774
Scn1a-PV	69	2871	1	1	TSeries-10292019-1106-017	electrical	1	500	14	1	0.360852
Scn1a-PV	69	2871	1	1	TSeries-10292019-1106-017	electrical	1	500	15	1	0.619254
Scn1a-PV	69	2871	1	1	TSeries-10292019-1106-017	electrical	1	500	16	1	0.837431
Scn1a-PV	69	2871	1	1	TSeries-10292019-1106-017	electrical	1	500	17	1	0.338885
Scn1a-PV	69	2871	1	1	TSeries-10292019-1106-017	electrical	1	500	18	1	0.55059
Scn1a-PV	69	2871	1	1	TSeries-10292019-1106-017	electrical	1	500	19	1	0.528265
Scn1a-PV	69	2871	1	1	TSeries-10292019-1106-017	electrical	1	500	20	1	0.552131
Scn1a-PV	69	2871	1	1	TSeries-10292019-1106-017	electrical	1	500	21	1	0.728634
Scn1a-PV	69	2871	1	1	TSeries-10292019-1106-017	electrical	1	500	22	1	0.712984
Scn1a-PV	69	2871	1	1	TSeries-10292019-1106-017	electrical	1	500	23	1	0.243045
Scn1a-PV	69	2871	1	1	TSeries-10292019-1106-017	electrical	1	500	24	1	0.597082
Scn1a-PV	69	2871	1	1	TSeries-10292019-1106-017	electrical	1	500	25	1	0.741239
Scn1a-PV	69	2871	1	1	TSeries-10292019-1106-017	electrical	1	500	26	1	0.615897
Scn1a-PV	69	2871	1	1	TSeries-10292019-1106-017	electrical	1	500	27	1	0.52065
Scn1a-PV	69	2871	1	1	TSeries-10292019-1106-017	electrical	1	500	28	1	0.486002
Scn1a-PV	69	2871	1	1	TSeries-10292019-1106-017	electrical	1	500	29	1	0.695243
Scn1a-PV	69	2871	1	1	TSeries-10292019-1106-017	electrical	1	500	30	1	0.774309
Scn1a-PV	69	2871	1	1	TSeries-10292019-1106-017	electrical	1	500	31	1	0.686804
Scn1a-PV	69	2871	1	1	TSeries-10292019-1106-017	electrical	1	500	32	1	0.75723
Scn1a-PV	69	2871	1	1	TSeries-10292019-1106-017	electrical	1	500	33	1	0.659955
Scn1a-PV	69	2871	1	1	TSeries-10292019-1106-017	electrical	1	500	34	1	0.653704
Scn1a-PV	69	2871	1	1	TSeries-10292019-1106-017	electrical	1	500	35	1	0.549664
Scn1a-PV	69	2871	1	1	TSeries-10292019-1106-017	electrical	1	500	36	1	0.47682
Scn1a-PV	69	2871	1	1	TSeries-10292019-1106-017	electrical	1	500	37	1	0.594459
Scn1a-PV	69	2871	1	1	TSeries-10292019-1106-017	electrical	1	500	38	1	0.341194
Scn1a-PV	69	2871	1	1	TSeries-10292019-1106-017	electrical	1	500	39	1	0.307871
Scn1a-PV	69	2871	1	1	TSeries-10292019-1106-017	electrical	1	500	40	1	0.574015
Scn1a-PV	69	2871	1	1	TSeries-10292019-1106-017	electrical	1	500	41	1	0.373317
Scn1a-PV	69	2871	1	1	TSeries-10292019-1106-017	electrical	1	500	42	1	0.321291
Scn1a-PV	69	2871	1	1	TSeries-10292019-1106-017	electrical	1	500	43	1	0.486716
Scn1a-PV	69	2871	1	1	TSeries-10292019-1106-017	electrical	1	500	44	1	0.520854
Scn1a-PV	69	2871	1	1	TSeries-10292019-1106-017	electrical	1	500	45	1	0.652872
Scn1a-PV	69	2871	1	1	TSeries-10292019-1106-017	electrical	1	500	46	1	0.540621
Scn1a-PV	69	2871	1	1	TSeries-10292019-1106-017	electrical	1	500	47	1	0.66034
Scn1a-PV	69	2871	1	1	TSeries-10292019-1106-017	electrical	1	500	48	1	0.559754
Scn1a-PV	69	2871	1	1	TSeries-10292019-1106-017	electrical	1	500	49	1	0.646935
Scn1a-PV	69	2871	1	1	TSeries-10292019-1106-017	electrical	1	500	50	1	0.185346
Scn1a-PV	69	2871	1	1	TSeries-10292019-1106-017	electrical	1	500	51	1	0.135905
Scn1a-PV	69	2871	1	1	TSeries-10292019-1106-017	electrical	1	500	52	1	0.598533
Scn1a-PV	69	2871	1	1	TSeries-10292019-1106-017	electrical	1	500	53	1	0.430706
Scn1a-PV	69	2871	1	1	TSeries-10292019-1106-017	electrical	1	500	54	1	0.276657
Scn1a-PV	69	2871	1	1	TSeries-10292019-1106-017	electrical	1	500	55	1	0.376092
Scn1a-PV	69	2871	1	1	TSeries-10292019-1106-017	electrical	1	500	56	1	0.598881
Scn1a-PV	69	2871	1	1	TSeries-10292019-1106-017	electrical	1	500	57	1	0.597962
Scn1a-PV	69	2871	1	1	TSeries-10292019-1106-017	electrical	1	500	58	1	0.652929
Scn1a-PV	69	2871	1	1	TSeries-10292019-1106-017	electrical	1	500	59	1	0.480193
Scn1a-PV	69	2871	1	1	TSeries-10292019-1106-017	electrical	1	500	60	0
Scn1a-PV	69	2871	1	1	TSeries-10292019-1106-018	electrical + opto	1	500	0	0
Scn1a-PV	69	2871	1	1	TSeries-10292019-1106-018	electrical + opto	1	500	1	0
Scn1a-PV	69	2871	1	1	TSeries-10292019-1106-018	electrical + opto	1	500	2	0
Scn1a-PV	69	2871	1	1	TSeries-10292019-1106-018	electrical + opto	1	500	3	0
Scn1a-PV	69	2871	1	1	TSeries-10292019-1106-018	electrical + opto	1	500	4	1	0.130577
Scn1a-PV	69	2871	1	1	TSeries-10292019-1106-018	electrical + opto	1	500	5	0
Scn1a-PV	69	2871	1	1	TSeries-10292019-1106-018	electrical + opto	1	500	6	1	0.232323
Scn1a-PV	69	2871	1	1	TSeries-10292019-1106-018	electrical + opto	1	500	7	0
Scn1a-PV	69	2871	1	1	TSeries-10292019-1106-018	electrical + opto	1	500	8	0
Scn1a-PV	69	2871	1	1	TSeries-10292019-1106-018	electrical + opto	1	500	9	1	0.127656
Scn1a-PV	69	2871	1	1	TSeries-10292019-1106-018	electrical + opto	1	500	10	1	0.108844
Scn1a-PV	69	2871	1	1	TSeries-10292019-1106-018	electrical + opto	1	500	11	0
Scn1a-PV	69	2871	1	1	TSeries-10292019-1106-018	electrical + opto	1	500	12	1	0.311682
Scn1a-PV	69	2871	1	1	TSeries-10292019-1106-018	electrical + opto	1	500	13	0
Scn1a-PV	69	2871	1	1	TSeries-10292019-1106-018	electrical + opto	1	500	14	0
Scn1a-PV	69	2871	1	1	TSeries-10292019-1106-018	electrical + opto	1	500	15	1	0.095898
Scn1a-PV	69	2871	1	1	TSeries-10292019-1106-018	electrical + opto	1	500	16	0
Scn1a-PV	69	2871	1	1	TSeries-10292019-1106-018	electrical + opto	1	500	17	0
Scn1a-PV	69	2871	1	1	TSeries-10292019-1106-018	electrical + opto	1	500	18	0
Scn1a-PV	69	2871	1	1	TSeries-10292019-1106-018	electrical + opto	1	500	19	0
Scn1a-PV	69	2871	1	1	TSeries-10292019-1106-018	electrical + opto	1	500	20	0
Scn1a-PV	69	2871	1	1	TSeries-10292019-1106-018	electrical + opto	1	500	21	0
Scn1a-PV	69	2871	1	1	TSeries-10292019-1106-018	electrical + opto	1	500	22	0
Scn1a-PV	69	2871	1	1	TSeries-10292019-1106-018	electrical + opto	1	500	23	0
Scn1a-PV	69	2871	1	1	TSeries-10292019-1106-018	electrical + opto	1	500	24	0
Scn1a-PV	69	2871	1	1	TSeries-10292019-1106-018	electrical + opto	1	500	25	0
Scn1a-PV	69	2871	1	1	TSeries-10292019-1106-018	electrical + opto	1	500	26	1	0.12109
Scn1a-PV	69	2871	1	1	TSeries-10292019-1106-018	electrical + opto	1	500	27	0
Scn1a-PV	69	2871	1	1	TSeries-10292019-1106-018	electrical + opto	1	500	28	0
Scn1a-PV	69	2871	1	1	TSeries-10292019-1106-018	electrical + opto	1	500	29	1	0.146858
Scn1a-PV	69	2871	1	1	TSeries-10292019-1106-018	electrical + opto	1	500	30	1	0.14778
Scn1a-PV	69	2871	1	1	TSeries-10292019-1106-018	electrical + opto	1	500	31	0
Scn1a-PV	69	2871	1	1	TSeries-10292019-1106-018	electrical + opto	1	500	32	0
Scn1a-PV	69	2871	1	1	TSeries-10292019-1106-018	electrical + opto	1	500	33	1	0.113047
Scn1a-PV	69	2871	1	1	TSeries-10292019-1106-018	electrical + opto	1	500	34	0
Scn1a-PV	69	2871	1	1	TSeries-10292019-1106-018	electrical + opto	1	500	35	0
Scn1a-PV	69	2871	1	1	TSeries-10292019-1106-018	electrical + opto	1	500	36	0
Scn1a-PV	69	2871	1	1	TSeries-10292019-1106-018	electrical + opto	1	500	37	1	0.111994
Scn1a-PV	69	2871	1	1	TSeries-10292019-1106-018	electrical + opto	1	500	38	0
Scn1a-PV	69	2871	1	1	TSeries-10292019-1106-018	electrical + opto	1	500	39	0
Scn1a-PV	69	2871	1	1	TSeries-10292019-1106-018	electrical + opto	1	500	40	0
Scn1a-PV	69	2871	1	1	TSeries-10292019-1106-018	electrical + opto	1	500	41	0
Scn1a-PV	69	2871	1	1	TSeries-10292019-1106-018	electrical + opto	1	500	42	0
Scn1a-PV	69	2871	1	1	TSeries-10292019-1106-018	electrical + opto	1	500	43	0
Scn1a-PV	69	2871	1	1	TSeries-10292019-1106-018	electrical + opto	1	500	44	0
Scn1a-PV	69	2871	1	1	TSeries-10292019-1106-018	electrical + opto	1	500	45	0
Scn1a-PV	69	2871	1	1	TSeries-10292019-1106-018	electrical + opto	1	500	46	0
Scn1a-PV	69	2871	1	1	TSeries-10292019-1106-018	electrical + opto	1	500	47	0
Scn1a-PV	69	2871	1	1	TSeries-10292019-1106-018	electrical + opto	1	500	48	0
Scn1a-PV	69	2871	1	1	TSeries-10292019-1106-018	electrical + opto	1	500	49	0
Scn1a-PV	69	2871	1	1	TSeries-10292019-1106-018	electrical + opto	1	500	50	0
Scn1a-PV	69	2871	1	1	TSeries-10292019-1106-018	electrical + opto	1	500	51	0
Scn1a-PV	69	2871	1	1	TSeries-10292019-1106-018	electrical + opto	1	500	52	0
Scn1a-PV	69	2871	1	1	TSeries-10292019-1106-018	electrical + opto	1	500	53	0
Scn1a-PV	69	2871	1	1	TSeries-10292019-1106-018	electrical + opto	1	500	54	0
Scn1a-PV	69	2871	1	1	TSeries-10292019-1106-018	electrical + opto	1	500	55	0
Scn1a-PV	69	2871	1	1	TSeries-10292019-1106-018	electrical + opto	1	500	56	0
Scn1a-PV	69	2871	1	1	TSeries-10292019-1106-018	electrical + opto	1	500	57	1	0.0926476
Scn1a-PV	69	2871	1	1	TSeries-10292019-1106-018	electrical + opto	1	500	58	0
Scn1a-PV	69	2871	1	1	TSeries-10292019-1106-018	electrical + opto	1	500	59	1	0.127326
Scn1a-PV	69	2871	1	1	TSeries-10292019-1106-018	electrical + opto	1	500	60	0
Scn1a-PV	61	2910	1	1	TSeries-10292019-1106-007	electrical	1	500	0	1	0.656349
Scn1a-PV	61	2910	1	1	TSeries-10292019-1106-007	electrical	1	500	1	1	0.426052
Scn1a-PV	61	2910	1	1	TSeries-10292019-1106-007	electrical	1	500	2	1	0.410693
Scn1a-PV	61	2910	1	1	TSeries-10292019-1106-007	electrical	1	500	3	1	0.515256
Scn1a-PV	61	2910	1	1	TSeries-10292019-1106-007	electrical	1	500	4	1	0.649816
Scn1a-PV	61	2910	1	1	TSeries-10292019-1106-007	electrical	1	500	5	1	0.922543
Scn1a-PV	61	2910	1	1	TSeries-10292019-1106-007	electrical	1	500	6	1	0.373903
Scn1a-PV	61	2910	1	1	TSeries-10292019-1106-007	electrical	1	500	7	1	0.645165
Scn1a-PV	61	2910	1	1	TSeries-10292019-1106-007	electrical	1	500	8	1	0.745502
Scn1a-PV	61	2910	1	1	TSeries-10292019-1106-007	electrical	1	500	9	1	0.557989
Scn1a-PV	61	2910	1	1	TSeries-10292019-1106-007	electrical	1	500	10	1	0.621381
Scn1a-PV	61	2910	1	1	TSeries-10292019-1106-007	electrical	1	500	11	1	0.699575
Scn1a-PV	61	2910	1	1	TSeries-10292019-1106-007	electrical	1	500	12	1	0.959056
Scn1a-PV	61	2910	1	1	TSeries-10292019-1106-007	electrical	1	500	13	1	0.785692
Scn1a-PV	61	2910	1	1	TSeries-10292019-1106-007	electrical	1	500	14	1	0.551283
Scn1a-PV	61	2910	1	1	TSeries-10292019-1106-007	electrical	1	500	15	1	0.311507
Scn1a-PV	61	2910	1	1	TSeries-10292019-1106-007	electrical	1	500	16	1	0.260024
Scn1a-PV	61	2910	1	1	TSeries-10292019-1106-007	electrical	1	500	17	1	0.727987
Scn1a-PV	61	2910	1	1	TSeries-10292019-1106-007	electrical	1	500	18	1	0.591406
Scn1a-PV	61	2910	1	1	TSeries-10292019-1106-007	electrical	1	500	19	1	0.68073
Scn1a-PV	61	2910	1	1	TSeries-10292019-1106-007	electrical	1	500	20	1	0.649416
Scn1a-PV	61	2910	1	1	TSeries-10292019-1106-007	electrical	1	500	21	1	0.832494
Scn1a-PV	61	2910	1	1	TSeries-10292019-1106-007	electrical	1	500	22	1	0.597061
Scn1a-PV	61	2910	1	1	TSeries-10292019-1106-007	electrical	1	500	23	0
Scn1a-PV	61	2910	1	1	TSeries-10292019-1106-007	electrical	1	500	24	1	0.572855
Scn1a-PV	61	2910	1	1	TSeries-10292019-1106-007	electrical	1	500	25	0
Scn1a-PV	61	2910	1	1	TSeries-10292019-1106-007	electrical	1	500	26	0
Scn1a-PV	61	2910	1	1	TSeries-10292019-1106-007	electrical	1	500	27	0
Scn1a-PV	61	2910	1	1	TSeries-10292019-1106-007	electrical	1	500	28	1	0.291522
Scn1a-PV	61	2910	1	1	TSeries-10292019-1106-007	electrical	1	500	29	1	0.662768
Scn1a-PV	61	2910	1	1	TSeries-10292019-1106-007	electrical	1	500	30	0
Scn1a-PV	61	2910	1	1	TSeries-10292019-1106-007	electrical	1	500	31	1	0.130088
Scn1a-PV	61	2910	1	1	TSeries-10292019-1106-007	electrical	1	500	32	1	0.764311
Scn1a-PV	61	2910	1	1	TSeries-10292019-1106-007	electrical	1	500	33	1	0.0943551
Scn1a-PV	61	2910	1	1	TSeries-10292019-1106-007	electrical	1	500	34	1	0.66133
Scn1a-PV	61	2910	1	1	TSeries-10292019-1106-007	electrical	1	500	35	1	0.617544
Scn1a-PV	61	2910	1	1	TSeries-10292019-1106-007	electrical	1	500	36	1	0.473974
Scn1a-PV	61	2910	1	1	TSeries-10292019-1106-007	electrical	1	500	37	0
Scn1a-PV	61	2910	1	1	TSeries-10292019-1106-007	electrical	1	500	38	1	0.600789
Scn1a-PV	61	2910	1	1	TSeries-10292019-1106-007	electrical	1	500	39	0
Scn1a-PV	61	2910	1	1	TSeries-10292019-1106-007	electrical	1	500	40	0
Scn1a-PV	61	2910	1	1	TSeries-10292019-1106-007	electrical	1	500	41	0
Scn1a-PV	61	2910	1	1	TSeries-10292019-1106-007	electrical	1	500	42	1	0.645328
Scn1a-PV	61	2910	1	1	TSeries-10292019-1106-007	electrical	1	500	43	1	0.195262
Scn1a-PV	61	2910	1	1	TSeries-10292019-1106-007	electrical	1	500	44	0
Scn1a-PV	61	2910	1	1	TSeries-10292019-1106-007	electrical	1	500	45	1	0.617957
Scn1a-PV	61	2910	1	1	TSeries-10292019-1106-007	electrical	1	500	46	1	0.459778
Scn1a-PV	61	2910	1	1	TSeries-10292019-1106-007	electrical	1	500	47	0
Scn1a-PV	61	2910	1	1	TSeries-10292019-1106-007	electrical	1	500	48	0
Scn1a-PV	61	2910	1	1	TSeries-10292019-1106-007	electrical	1	500	49	0
Scn1a-PV	61	2910	1	1	TSeries-10292019-1106-007	electrical	1	500	50	0
Scn1a-PV	61	2910	1	1	TSeries-10292019-1106-007	electrical	1	500	51	0
Scn1a-PV	61	2910	1	1	TSeries-10292019-1106-007	electrical	1	500	52	0
Scn1a-PV	61	2910	1	1	TSeries-10292019-1106-007	electrical	1	500	53	0
Scn1a-PV	61	2910	1	1	TSeries-10292019-1106-007	electrical	1	500	54	1	0.575263
Scn1a-PV	61	2910	1	1	TSeries-10292019-1106-007	electrical	1	500	55	0
Scn1a-PV	61	2910	1	1	TSeries-10292019-1106-007	electrical	1	500	56	1	0.313578
Scn1a-PV	61	2910	1	1	TSeries-10292019-1106-007	electrical	1	500	57	0
Scn1a-PV	61	2910	1	1	TSeries-10292019-1106-007	electrical	1	500	58	0
Scn1a-PV	61	2910	1	1	TSeries-10292019-1106-007	electrical	1	500	59	0
Scn1a-PV	61	2910	1	1	TSeries-10292019-1106-007	electrical	1	500	60	1	0.793512
Scn1a-PV	61	2910	1	1	TSeries-10292019-1106-007	electrical	1	500	61	0
Scn1a-PV	61	2910	1	1	TSeries-10292019-1106-007	electrical	1	500	62	1	0.508104
Scn1a-PV	61	2910	1	1	TSeries-10292019-1106-007	electrical	1	500	63	1	0.43592
Scn1a-PV	61	2910	1	1	TSeries-10292019-1106-007	electrical	1	500	64	0
Scn1a-PV	61	2910	1	1	TSeries-10292019-1106-007	electrical	1	500	65	0
Scn1a-PV	61	2910	1	1	TSeries-10292019-1106-007	electrical	1	500	66	1	0.729921
Scn1a-PV	61	2910	1	1	TSeries-10292019-1106-007	electrical	1	500	67	0
Scn1a-PV	61	2910	1	1	TSeries-10292019-1106-007	electrical	1	500	68	0
Scn1a-PV	61	2910	1	1	TSeries-10292019-1106-007	electrical	1	500	69	0
Scn1a-PV	61	2910	1	1	TSeries-10292019-1106-007	electrical	1	500	70	0
Scn1a-PV	61	2910	1	1	TSeries-10292019-1106-007	electrical	1	500	71	0
Scn1a-PV	61	2910	1	1	TSeries-10292019-1106-007	electrical	1	500	72	0
Scn1a-PV	61	2910	1	1	TSeries-10292019-1106-007	electrical	1	500	73	0
Scn1a-PV	61	2910	1	1	TSeries-10292019-1106-007	electrical	1	500	74	0
Scn1a-PV	61	2910	1	1	TSeries-10292019-1106-007	electrical	1	500	75	1	0.594995
Scn1a-PV	61	2910	1	1	TSeries-10292019-1106-007	electrical	1	500	76	1	0.404694
Scn1a-PV	61	2910	1	1	TSeries-10292019-1106-007	electrical	1	500	77	1	0.363249
Scn1a-PV	61	2910	1	1	TSeries-10292019-1106-007	electrical	1	500	78	0
Scn1a-PV	61	2910	1	1	TSeries-10292019-1106-007	electrical	1	500	79	1	0.523922
Scn1a-PV	61	2910	1	1	TSeries-10292019-1106-007	electrical	1	500	80	1	0.538839
Scn1a-PV	61	2910	1	1	TSeries-10292019-1106-007	electrical	1	500	81	1	0.504693
Scn1a-PV	61	2910	1	1	TSeries-10292019-1106-007	electrical	1	500	82	1	0.752576
Scn1a-PV	61	2910	1	1	TSeries-10292019-1106-008	electrical + opto	1	500	0	1	0.468462
Scn1a-PV	61	2910	1	1	TSeries-10292019-1106-008	electrical + opto	1	500	1	1	0.296775
Scn1a-PV	61	2910	1	1	TSeries-10292019-1106-008	electrical + opto	1	500	2	1	0.33954
Scn1a-PV	61	2910	1	1	TSeries-10292019-1106-008	electrical + opto	1	500	3	1	0.407346
Scn1a-PV	61	2910	1	1	TSeries-10292019-1106-008	electrical + opto	1	500	4	1	0.567008
Scn1a-PV	61	2910	1	1	TSeries-10292019-1106-008	electrical + opto	1	500	5	1	0.252052
Scn1a-PV	61	2910	1	1	TSeries-10292019-1106-008	electrical + opto	1	500	6	0
Scn1a-PV	61	2910	1	1	TSeries-10292019-1106-008	electrical + opto	1	500	7	1	0.284422
Scn1a-PV	61	2910	1	1	TSeries-10292019-1106-008	electrical + opto	1	500	8	1	0.277253
Scn1a-PV	61	2910	1	1	TSeries-10292019-1106-008	electrical + opto	1	500	9	1	0.175974
Scn1a-PV	61	2910	1	1	TSeries-10292019-1106-008	electrical + opto	1	500	10	1	0.507111
Scn1a-PV	61	2910	1	1	TSeries-10292019-1106-008	electrical + opto	1	500	11	1	0.496695
Scn1a-PV	61	2910	1	1	TSeries-10292019-1106-008	electrical + opto	1	500	12	1	0.517062
Scn1a-PV	61	2910	1	1	TSeries-10292019-1106-008	electrical + opto	1	500	13	1	0.539118
Scn1a-PV	61	2910	1	1	TSeries-10292019-1106-008	electrical + opto	1	500	14	1	0.2784
Scn1a-PV	61	2910	1	1	TSeries-10292019-1106-008	electrical + opto	1	500	15	0
Scn1a-PV	61	2910	1	1	TSeries-10292019-1106-008	electrical + opto	1	500	16	1	0.186394
Scn1a-PV	61	2910	1	1	TSeries-10292019-1106-008	electrical + opto	1	500	17	1	0.139835
Scn1a-PV	61	2910	1	1	TSeries-10292019-1106-008	electrical + opto	1	500	18	1	0.316742
Scn1a-PV	61	2910	1	1	TSeries-10292019-1106-008	electrical + opto	1	500	19	1	0.367025
Scn1a-PV	61	2910	1	1	TSeries-10292019-1106-008	electrical + opto	1	500	20	1	0.51363
Scn1a-PV	61	2910	1	1	TSeries-10292019-1106-008	electrical + opto	1	500	21	0
Scn1a-PV	61	2910	1	1	TSeries-10292019-1106-008	electrical + opto	1	500	22	1	0.539561
Scn1a-PV	61	2910	1	1	TSeries-10292019-1106-008	electrical + opto	1	500	23	0
Scn1a-PV	61	2910	1	1	TSeries-10292019-1106-008	electrical + opto	1	500	24	1	0.152427
Scn1a-PV	61	2910	1	1	TSeries-10292019-1106-008	electrical + opto	1	500	25	0
Scn1a-PV	61	2910	1	1	TSeries-10292019-1106-008	electrical + opto	1	500	26	0
Scn1a-PV	61	2910	1	1	TSeries-10292019-1106-008	electrical + opto	1	500	27	0
Scn1a-PV	61	2910	1	1	TSeries-10292019-1106-008	electrical + opto	1	500	28	0
Scn1a-PV	61	2910	1	1	TSeries-10292019-1106-008	electrical + opto	1	500	29	0
Scn1a-PV	61	2910	1	1	TSeries-10292019-1106-008	electrical + opto	1	500	30	0
Scn1a-PV	61	2910	1	1	TSeries-10292019-1106-008	electrical + opto	1	500	31	0
Scn1a-PV	61	2910	1	1	TSeries-10292019-1106-008	electrical + opto	1	500	32	0
Scn1a-PV	61	2910	1	1	TSeries-10292019-1106-008	electrical + opto	1	500	33	0
Scn1a-PV	61	2910	1	1	TSeries-10292019-1106-008	electrical + opto	1	500	34	0
Scn1a-PV	61	2910	1	1	TSeries-10292019-1106-008	electrical + opto	1	500	35	0
Scn1a-PV	61	2910	1	1	TSeries-10292019-1106-008	electrical + opto	1	500	36	1	0.30578
Scn1a-PV	61	2910	1	1	TSeries-10292019-1106-008	electrical + opto	1	500	37	0
Scn1a-PV	61	2910	1	1	TSeries-10292019-1106-008	electrical + opto	1	500	38	0
Scn1a-PV	61	2910	1	1	TSeries-10292019-1106-008	electrical + opto	1	500	39	0
Scn1a-PV	61	2910	1	1	TSeries-10292019-1106-008	electrical + opto	1	500	40	0
Scn1a-PV	61	2910	1	1	TSeries-10292019-1106-008	electrical + opto	1	500	41	0
Scn1a-PV	61	2910	1	1	TSeries-10292019-1106-008	electrical + opto	1	500	42	0
Scn1a-PV	61	2910	1	1	TSeries-10292019-1106-008	electrical + opto	1	500	43	0
Scn1a-PV	61	2910	1	1	TSeries-10292019-1106-008	electrical + opto	1	500	44	0
Scn1a-PV	61	2910	1	1	TSeries-10292019-1106-008	electrical + opto	1	500	45	0
Scn1a-PV	61	2910	1	1	TSeries-10292019-1106-008	electrical + opto	1	500	46	1	0.0811663
Scn1a-PV	61	2910	1	1	TSeries-10292019-1106-008	electrical + opto	1	500	47	0
Scn1a-PV	61	2910	1	1	TSeries-10292019-1106-008	electrical + opto	1	500	48	0
Scn1a-PV	61	2910	1	1	TSeries-10292019-1106-008	electrical + opto	1	500	49	0
Scn1a-PV	61	2910	1	1	TSeries-10292019-1106-008	electrical + opto	1	500	50	0
Scn1a-PV	61	2910	1	1	TSeries-10292019-1106-008	electrical + opto	1	500	51	0
Scn1a-PV	61	2910	1	1	TSeries-10292019-1106-008	electrical + opto	1	500	52	0
Scn1a-PV	61	2910	1	1	TSeries-10292019-1106-008	electrical + opto	1	500	53	0
Scn1a-PV	61	2910	1	1	TSeries-10292019-1106-008	electrical + opto	1	500	54	0
Scn1a-PV	61	2910	1	1	TSeries-10292019-1106-008	electrical + opto	1	500	55	0
Scn1a-PV	61	2910	1	1	TSeries-10292019-1106-008	electrical + opto	1	500	56	0
Scn1a-PV	61	2910	1	1	TSeries-10292019-1106-008	electrical + opto	1	500	57	0
Scn1a-PV	61	2910	1	1	TSeries-10292019-1106-008	electrical + opto	1	500	58	0
Scn1a-PV	61	2910	1	1	TSeries-10292019-1106-008	electrical + opto	1	500	59	0
Scn1a-PV	61	2910	1	1	TSeries-10292019-1106-008	electrical + opto	1	500	60	0
Scn1a-PV	61	2910	1	1	TSeries-10292019-1106-008	electrical + opto	1	500	61	0
Scn1a-PV	61	2910	1	1	TSeries-10292019-1106-008	electrical + opto	1	500	62	0
Scn1a-PV	61	2910	1	1	TSeries-10292019-1106-008	electrical + opto	1	500	63	0
Scn1a-PV	61	2910	1	1	TSeries-10292019-1106-008	electrical + opto	1	500	64	0
Scn1a-PV	61	2910	1	1	TSeries-10292019-1106-008	electrical + opto	1	500	65	0
Scn1a-PV	61	2910	1	1	TSeries-10292019-1106-008	electrical + opto	1	500	66	0
Scn1a-PV	61	2910	1	1	TSeries-10292019-1106-008	electrical + opto	1	500	67	0
Scn1a-PV	61	2910	1	1	TSeries-10292019-1106-008	electrical + opto	1	500	68	0
Scn1a-PV	61	2910	1	1	TSeries-10292019-1106-008	electrical + opto	1	500	69	0
Scn1a-PV	61	2910	1	1	TSeries-10292019-1106-008	electrical + opto	1	500	70	0
Scn1a-PV	61	2910	1	1	TSeries-10292019-1106-008	electrical + opto	1	500	71	0
Scn1a-PV	61	2910	1	1	TSeries-10292019-1106-008	electrical + opto	1	500	72	0
Scn1a-PV	61	2910	1	1	TSeries-10292019-1106-008	electrical + opto	1	500	73	0
Scn1a-PV	61	2910	1	1	TSeries-10292019-1106-008	electrical + opto	1	500	74	0
Scn1a-PV	61	2910	1	1	TSeries-10292019-1106-008	electrical + opto	1	500	75	0
Scn1a-PV	61	2910	1	1	TSeries-10292019-1106-008	electrical + opto	1	500	76	0
Scn1a-PV	61	2910	1	1	TSeries-10292019-1106-008	electrical + opto	1	500	77	0
Scn1a-PV	61	2910	1	1	TSeries-10292019-1106-008	electrical + opto	1	500	78	0
Scn1a-PV	61	2910	1	1	TSeries-10292019-1106-008	electrical + opto	1	500	79	1	0.441168
Scn1a-PV	61	2910	1	1	TSeries-10292019-1106-008	electrical + opto	1	500	80	0
Scn1a-PV	61	2910	1	1	TSeries-10292019-1106-008	electrical + opto	1	500	81	1	0.376173
Scn1a-PV	61	2910	1	1	TSeries-10292019-1106-008	electrical + opto	1	500	82	1	0.593669
Scn1a-PV	61	2910	1	2	TSeries-10292019-1106-012	electrical	1	500	0	1	0.522827
Scn1a-PV	61	2910	1	2	TSeries-10292019-1106-012	electrical	1	500	1	0
Scn1a-PV	61	2910	1	2	TSeries-10292019-1106-012	electrical	1	500	2	1	0.215693
Scn1a-PV	61	2910	1	2	TSeries-10292019-1106-012	electrical	1	500	3	1	0.225735
Scn1a-PV	61	2910	1	2	TSeries-10292019-1106-012	electrical	1	500	4	1	0.375883
Scn1a-PV	61	2910	1	2	TSeries-10292019-1106-012	electrical	1	500	5	1	0.841146
Scn1a-PV	61	2910	1	2	TSeries-10292019-1106-012	electrical	1	500	6	1	0.403619
Scn1a-PV	61	2910	1	2	TSeries-10292019-1106-012	electrical	1	500	7	0
Scn1a-PV	61	2910	1	2	TSeries-10292019-1106-012	electrical	1	500	8	1	0.104674
Scn1a-PV	61	2910	1	2	TSeries-10292019-1106-012	electrical	1	500	9	0
Scn1a-PV	61	2910	1	2	TSeries-10292019-1106-012	electrical	1	500	10	0
Scn1a-PV	61	2910	1	2	TSeries-10292019-1106-012	electrical	1	500	11	0
Scn1a-PV	61	2910	1	2	TSeries-10292019-1106-012	electrical	1	500	12	0
Scn1a-PV	61	2910	1	2	TSeries-10292019-1106-012	electrical	1	500	13	0
Scn1a-PV	61	2910	1	2	TSeries-10292019-1106-012	electrical	1	500	14	1	0.131737
Scn1a-PV	61	2910	1	2	TSeries-10292019-1106-012	electrical	1	500	15	1	0.560637
Scn1a-PV	61	2910	1	2	TSeries-10292019-1106-012	electrical	1	500	16	0
Scn1a-PV	61	2910	1	2	TSeries-10292019-1106-012	electrical	1	500	17	1	0.119344
Scn1a-PV	61	2910	1	2	TSeries-10292019-1106-012	electrical	1	500	18	0
Scn1a-PV	61	2910	1	2	TSeries-10292019-1106-012	electrical	1	500	19	0
Scn1a-PV	61	2910	1	2	TSeries-10292019-1106-012	electrical	1	500	20	1	0.681975
Scn1a-PV	61	2910	1	2	TSeries-10292019-1106-012	electrical	1	500	21	1	0.118187
Scn1a-PV	61	2910	1	2	TSeries-10292019-1106-012	electrical	1	500	22	0
Scn1a-PV	61	2910	1	2	TSeries-10292019-1106-012	electrical	1	500	23	1	0.567613
Scn1a-PV	61	2910	1	2	TSeries-10292019-1106-012	electrical	1	500	24	0
Scn1a-PV	61	2910	1	2	TSeries-10292019-1106-012	electrical	1	500	25	1	0.148717
Scn1a-PV	61	2910	1	2	TSeries-10292019-1106-012	electrical	1	500	26	0
Scn1a-PV	61	2910	1	2	TSeries-10292019-1106-012	electrical	1	500	27	0
Scn1a-PV	61	2910	1	2	TSeries-10292019-1106-012	electrical	1	500	28	1	0.568031
Scn1a-PV	61	2910	1	2	TSeries-10292019-1106-012	electrical	1	500	29	0
Scn1a-PV	61	2910	1	2	TSeries-10292019-1106-012	electrical	1	500	30	0
Scn1a-PV	61	2910	1	2	TSeries-10292019-1106-012	electrical	1	500	31	0
Scn1a-PV	61	2910	1	2	TSeries-10292019-1106-012	electrical	1	500	32	0
Scn1a-PV	61	2910	1	2	TSeries-10292019-1106-012	electrical	1	500	33	0
Scn1a-PV	61	2910	1	2	TSeries-10292019-1106-012	electrical	1	500	34	0
Scn1a-PV	61	2910	1	2	TSeries-10292019-1106-012	electrical	1	500	35	0
Scn1a-PV	61	2910	1	2	TSeries-10292019-1106-012	electrical	1	500	36	0
Scn1a-PV	61	2910	1	2	TSeries-10292019-1106-012	electrical	1	500	37	0
Scn1a-PV	61	2910	1	2	TSeries-10292019-1106-012	electrical	1	500	38	0
Scn1a-PV	61	2910	1	2	TSeries-10292019-1106-012	electrical	1	500	39	0
Scn1a-PV	61	2910	1	2	TSeries-10292019-1106-012	electrical	1	500	40	1	0.518758
Scn1a-PV	61	2910	1	2	TSeries-10292019-1106-012	electrical	1	500	41	0
Scn1a-PV	61	2910	1	2	TSeries-10292019-1106-012	electrical	1	500	42	0
Scn1a-PV	61	2910	1	2	TSeries-10292019-1106-012	electrical	1	500	43	1	0.186933
Scn1a-PV	61	2910	1	2	TSeries-10292019-1106-012	electrical	1	500	44	1	0.188839
Scn1a-PV	61	2910	1	2	TSeries-10292019-1106-012	electrical	1	500	45	1	0.487761
Scn1a-PV	61	2910	1	2	TSeries-10292019-1106-012	electrical	1	500	46	0
Scn1a-PV	61	2910	1	2	TSeries-10292019-1106-012	electrical	1	500	47	0
Scn1a-PV	61	2910	1	2	TSeries-10292019-1106-012	electrical	1	500	48	0
Scn1a-PV	61	2910	1	2	TSeries-10292019-1106-012	electrical	1	500	49	0
Scn1a-PV	61	2910	1	2	TSeries-10292019-1106-012	electrical	1	500	50	0
Scn1a-PV	61	2910	1	2	TSeries-10292019-1106-012	electrical	1	500	51	1	0.181991
Scn1a-PV	61	2910	1	2	TSeries-10292019-1106-012	electrical	1	500	52	0
Scn1a-PV	61	2910	1	2	TSeries-10292019-1106-012	electrical	1	500	53	1	0.278464
Scn1a-PV	61	2910	1	2	TSeries-10292019-1106-012	electrical	1	500	54	0
Scn1a-PV	61	2910	1	2	TSeries-10292019-1106-012	electrical	1	500	55	1	0.846374
Scn1a-PV	61	2910	1	2	TSeries-10292019-1106-012	electrical	1	500	56	0
Scn1a-PV	61	2910	1	2	TSeries-10292019-1106-012	electrical	1	500	57	1	0.375618
Scn1a-PV	61	2910	1	2	TSeries-10292019-1106-012	electrical	1	500	58	1	0.309236
Scn1a-PV	61	2910	1	2	TSeries-10292019-1106-012	electrical	1	500	59	1	0.442196
Scn1a-PV	61	2910	1	2	TSeries-10292019-1106-012	electrical	1	500	60	1	0.517018
Scn1a-PV	61	2910	1	2	TSeries-10292019-1106-012	electrical	1	500	61	1	0.327173
Scn1a-PV	61	2910	1	2	TSeries-10292019-1106-012	electrical	1	500	62	1	0.450027
Scn1a-PV	61	2910	1	2	TSeries-10292019-1106-012	electrical	1	500	63	0
Scn1a-PV	61	2910	1	2	TSeries-10292019-1106-012	electrical	1	500	64	0
Scn1a-PV	61	2910	1	2	TSeries-10292019-1106-012	electrical	1	500	65	1	0.749189
Scn1a-PV	61	2910	1	2	TSeries-10292019-1106-012	electrical	1	500	66	1	0.230516
Scn1a-PV	61	2910	1	2	TSeries-10292019-1106-012	electrical	1	500	67	0
Scn1a-PV	61	2910	1	2	TSeries-10292019-1106-012	electrical	1	500	68	0
Scn1a-PV	61	2910	1	2	TSeries-10292019-1106-012	electrical	1	500	69	0
Scn1a-PV	61	2910	1	2	TSeries-10292019-1106-012	electrical	1	500	70	0
Scn1a-PV	61	2910	1	2	TSeries-10292019-1106-012	electrical	1	500	71	0
Scn1a-PV	61	2910	1	2	TSeries-10292019-1106-012	electrical	1	500	72	1	0.286175
Scn1a-PV	61	2910	1	2	TSeries-10292019-1106-012	electrical	1	500	73	1	0.278512
Scn1a-PV	61	2910	1	2	TSeries-10292019-1106-012	electrical	1	500	74	1	0.635639
Scn1a-PV	61	2910	1	2	TSeries-10292019-1106-012	electrical	1	500	75	1	0.165075
Scn1a-PV	61	2910	1	2	TSeries-10292019-1106-012	electrical	1	500	76	1	0.300703
Scn1a-PV	61	2910	1	2	TSeries-10292019-1106-012	electrical	1	500	77	1	0.725537
Scn1a-PV	61	2910	1	2	TSeries-10292019-1106-012	electrical	1	500	78	1	0.661457
Scn1a-PV	61	2910	1	2	TSeries-10292019-1106-012	electrical	1	500	79	1	0.575572
Scn1a-PV	61	2910	1	2	TSeries-10292019-1106-012	electrical	1	500	80	1	0.584288
Scn1a-PV	61	2910	1	2	TSeries-10292019-1106-012	electrical	1	500	81	1	0.664605
Scn1a-PV	61	2910	1	2	TSeries-10292019-1106-012	electrical	1	500	82	1	0.737293
Scn1a-PV	61	2910	1	2	TSeries-10292019-1106-012	electrical	1	500	83	1	0.674011
Scn1a-PV	61	2910	1	2	TSeries-10292019-1106-012	electrical	1	500	84	1	0.594286
Scn1a-PV	61	2910	1	2	TSeries-10292019-1106-012	electrical	1	500	85	1	0.770915
Scn1a-PV	61	2910	1	2	TSeries-10292019-1106-012	electrical	1	500	86	1	0.64785
Scn1a-PV	61	2910	1	2	TSeries-10292019-1106-012	electrical	1	500	87	1	0.645385
Scn1a-PV	61	2910	1	2	TSeries-10292019-1106-012	electrical	1	500	88	1	0.58225
Scn1a-PV	61	2910	1	2	TSeries-10292019-1106-012	electrical	1	500	89	1	0.429708
Scn1a-PV	61	2910	1	2	TSeries-10292019-1106-012	electrical	1	500	90	1	0.400518
Scn1a-PV	61	2910	1	2	TSeries-10292019-1106-012	electrical	1	500	91	1	0.352239
Scn1a-PV	61	2910	1	2	TSeries-10292019-1106-012	electrical	1	500	92	1	0.529759
Scn1a-PV	61	2910	1	2	TSeries-10292019-1106-012	electrical	1	500	93	1	0.565484
Scn1a-PV	61	2910	1	2	TSeries-10292019-1106-012	electrical	1	500	94	1	0.422568
Scn1a-PV	61	2910	1	2	TSeries-10292019-1106-012	electrical	1	500	95	1	0.598598
Scn1a-PV	61	2910	1	2	TSeries-10292019-1106-012	electrical	1	500	96	1	0.623778
Scn1a-PV	61	2910	1	2	TSeries-10292019-1106-012	electrical	1	500	97	1	0.8186
Scn1a-PV	61	2910	1	2	TSeries-10292019-1106-012	electrical	1	500	98	1	0.557373
Scn1a-PV	61	2910	1	2	TSeries-10292019-1106-012	electrical	1	500	99	1	0.550202
Scn1a-PV	61	2910	1	2	TSeries-10292019-1106-012	electrical	1	500	100	1	0.346105
Scn1a-PV	61	2910	1	2	TSeries-10292019-1106-012	electrical	1	500	101	1	0.182802
Scn1a-PV	61	2910	1	2	TSeries-10292019-1106-012	electrical	1	500	102	0
Scn1a-PV	61	2910	1	2	TSeries-10292019-1106-012	electrical	1	500	103	0
Scn1a-PV	61	2910	1	2	TSeries-10292019-1106-012	electrical	1	500	104	0
Scn1a-PV	61	2910	1	2	TSeries-10292019-1106-012	electrical	1	500	105	1	0.33356
Scn1a-PV	61	2910	1	2	TSeries-10292019-1106-012	electrical	1	500	106	1	0.349096
Scn1a-PV	61	2910	1	2	TSeries-10292019-1106-012	electrical	1	500	107	1	0.55174
Scn1a-PV	61	2910	1	2	TSeries-10292019-1106-012	electrical	1	500	108	1	0.585334
Scn1a-PV	61	2910	1	2	TSeries-10292019-1106-013	electrical + opto	1	500	0	0
Scn1a-PV	61	2910	1	2	TSeries-10292019-1106-013	electrical + opto	1	500	1	0
Scn1a-PV	61	2910	1	2	TSeries-10292019-1106-013	electrical + opto	1	500	2	0
Scn1a-PV	61	2910	1	2	TSeries-10292019-1106-013	electrical + opto	1	500	3	0
Scn1a-PV	61	2910	1	2	TSeries-10292019-1106-013	electrical + opto	1	500	4	0
Scn1a-PV	61	2910	1	2	TSeries-10292019-1106-013	electrical + opto	1	500	5	0
Scn1a-PV	61	2910	1	2	TSeries-10292019-1106-013	electrical + opto	1	500	6	0
Scn1a-PV	61	2910	1	2	TSeries-10292019-1106-013	electrical + opto	1	500	7	0
Scn1a-PV	61	2910	1	2	TSeries-10292019-1106-013	electrical + opto	1	500	8	0
Scn1a-PV	61	2910	1	2	TSeries-10292019-1106-013	electrical + opto	1	500	9	0
Scn1a-PV	61	2910	1	2	TSeries-10292019-1106-013	electrical + opto	1	500	10	0
Scn1a-PV	61	2910	1	2	TSeries-10292019-1106-013	electrical + opto	1	500	11	0
Scn1a-PV	61	2910	1	2	TSeries-10292019-1106-013	electrical + opto	1	500	12	0
Scn1a-PV	61	2910	1	2	TSeries-10292019-1106-013	electrical + opto	1	500	13	0
Scn1a-PV	61	2910	1	2	TSeries-10292019-1106-013	electrical + opto	1	500	14	0
Scn1a-PV	61	2910	1	2	TSeries-10292019-1106-013	electrical + opto	1	500	15	0
Scn1a-PV	61	2910	1	2	TSeries-10292019-1106-013	electrical + opto	1	500	16	0
Scn1a-PV	61	2910	1	2	TSeries-10292019-1106-013	electrical + opto	1	500	17	0
Scn1a-PV	61	2910	1	2	TSeries-10292019-1106-013	electrical + opto	1	500	18	0
Scn1a-PV	61	2910	1	2	TSeries-10292019-1106-013	electrical + opto	1	500	19	0
Scn1a-PV	61	2910	1	2	TSeries-10292019-1106-013	electrical + opto	1	500	20	0
Scn1a-PV	61	2910	1	2	TSeries-10292019-1106-013	electrical + opto	1	500	21	0
Scn1a-PV	61	2910	1	2	TSeries-10292019-1106-013	electrical + opto	1	500	22	0
Scn1a-PV	61	2910	1	2	TSeries-10292019-1106-013	electrical + opto	1	500	23	0
Scn1a-PV	61	2910	1	2	TSeries-10292019-1106-013	electrical + opto	1	500	24	0
Scn1a-PV	61	2910	1	2	TSeries-10292019-1106-013	electrical + opto	1	500	25	0
Scn1a-PV	61	2910	1	2	TSeries-10292019-1106-013	electrical + opto	1	500	26	0
Scn1a-PV	61	2910	1	2	TSeries-10292019-1106-013	electrical + opto	1	500	27	0
Scn1a-PV	61	2910	1	2	TSeries-10292019-1106-013	electrical + opto	1	500	28	0
Scn1a-PV	61	2910	1	2	TSeries-10292019-1106-013	electrical + opto	1	500	29	0
Scn1a-PV	61	2910	1	2	TSeries-10292019-1106-013	electrical + opto	1	500	30	0
Scn1a-PV	61	2910	1	2	TSeries-10292019-1106-013	electrical + opto	1	500	31	0
Scn1a-PV	61	2910	1	2	TSeries-10292019-1106-013	electrical + opto	1	500	32	0
Scn1a-PV	61	2910	1	2	TSeries-10292019-1106-013	electrical + opto	1	500	33	0
Scn1a-PV	61	2910	1	2	TSeries-10292019-1106-013	electrical + opto	1	500	34	0
Scn1a-PV	61	2910	1	2	TSeries-10292019-1106-013	electrical + opto	1	500	35	0
Scn1a-PV	61	2910	1	2	TSeries-10292019-1106-013	electrical + opto	1	500	36	0
Scn1a-PV	61	2910	1	2	TSeries-10292019-1106-013	electrical + opto	1	500	37	0
Scn1a-PV	61	2910	1	2	TSeries-10292019-1106-013	electrical + opto	1	500	38	0
Scn1a-PV	61	2910	1	2	TSeries-10292019-1106-013	electrical + opto	1	500	39	0
Scn1a-PV	61	2910	1	2	TSeries-10292019-1106-013	electrical + opto	1	500	40	0
Scn1a-PV	61	2910	1	2	TSeries-10292019-1106-013	electrical + opto	1	500	41	0
Scn1a-PV	61	2910	1	2	TSeries-10292019-1106-013	electrical + opto	1	500	42	0
Scn1a-PV	61	2910	1	2	TSeries-10292019-1106-013	electrical + opto	1	500	43	0
Scn1a-PV	61	2910	1	2	TSeries-10292019-1106-013	electrical + opto	1	500	44	0
Scn1a-PV	61	2910	1	2	TSeries-10292019-1106-013	electrical + opto	1	500	45	1	0.472292
Scn1a-PV	61	2910	1	2	TSeries-10292019-1106-013	electrical + opto	1	500	46	0
Scn1a-PV	61	2910	1	2	TSeries-10292019-1106-013	electrical + opto	1	500	47	0
Scn1a-PV	61	2910	1	2	TSeries-10292019-1106-013	electrical + opto	1	500	48	0
Scn1a-PV	61	2910	1	2	TSeries-10292019-1106-013	electrical + opto	1	500	49	0
Scn1a-PV	61	2910	1	2	TSeries-10292019-1106-013	electrical + opto	1	500	50	1	0.23485
Scn1a-PV	61	2910	1	2	TSeries-10292019-1106-013	electrical + opto	1	500	51	1	0.241663
Scn1a-PV	61	2910	1	2	TSeries-10292019-1106-013	electrical + opto	1	500	52	0
Scn1a-PV	61	2910	1	2	TSeries-10292019-1106-013	electrical + opto	1	500	53	0
Scn1a-PV	61	2910	1	2	TSeries-10292019-1106-013	electrical + opto	1	500	54	0
Scn1a-PV	61	2910	1	2	TSeries-10292019-1106-013	electrical + opto	1	500	55	0
Scn1a-PV	61	2910	1	2	TSeries-10292019-1106-013	electrical + opto	1	500	56	0
Scn1a-PV	61	2910	1	2	TSeries-10292019-1106-013	electrical + opto	1	500	57	0
Scn1a-PV	61	2910	1	2	TSeries-10292019-1106-013	electrical + opto	1	500	58	0
Scn1a-PV	61	2910	1	2	TSeries-10292019-1106-013	electrical + opto	1	500	59	0
Scn1a-PV	61	2910	1	2	TSeries-10292019-1106-013	electrical + opto	1	500	60	1	0.162961
Scn1a-PV	61	2910	1	2	TSeries-10292019-1106-013	electrical + opto	1	500	61	0
Scn1a-PV	61	2910	1	2	TSeries-10292019-1106-013	electrical + opto	1	500	62	1	0.110765
Scn1a-PV	61	2910	1	2	TSeries-10292019-1106-013	electrical + opto	1	500	63	0
Scn1a-PV	61	2910	1	2	TSeries-10292019-1106-013	electrical + opto	1	500	64	0
Scn1a-PV	61	2910	1	2	TSeries-10292019-1106-013	electrical + opto	1	500	65	0
Scn1a-PV	61	2910	1	2	TSeries-10292019-1106-013	electrical + opto	1	500	66	0
Scn1a-PV	61	2910	1	2	TSeries-10292019-1106-013	electrical + opto	1	500	67	0
Scn1a-PV	61	2910	1	2	TSeries-10292019-1106-013	electrical + opto	1	500	68	0
Scn1a-PV	61	2910	1	2	TSeries-10292019-1106-013	electrical + opto	1	500	69	0
Scn1a-PV	61	2910	1	2	TSeries-10292019-1106-013	electrical + opto	1	500	70	0
Scn1a-PV	61	2910	1	2	TSeries-10292019-1106-013	electrical + opto	1	500	71	0
Scn1a-PV	61	2910	1	2	TSeries-10292019-1106-013	electrical + opto	1	500	72	0
Scn1a-PV	61	2910	1	2	TSeries-10292019-1106-013	electrical + opto	1	500	73	0
Scn1a-PV	61	2910	1	2	TSeries-10292019-1106-013	electrical + opto	1	500	74	0
Scn1a-PV	61	2910	1	2	TSeries-10292019-1106-013	electrical + opto	1	500	75	0
Scn1a-PV	61	2910	1	2	TSeries-10292019-1106-013	electrical + opto	1	500	76	0
Scn1a-PV	61	2910	1	2	TSeries-10292019-1106-013	electrical + opto	1	500	77	1	0.190483
Scn1a-PV	61	2910	1	2	TSeries-10292019-1106-013	electrical + opto	1	500	78	0
Scn1a-PV	61	2910	1	2	TSeries-10292019-1106-013	electrical + opto	1	500	79	1	0.177597
Scn1a-PV	61	2910	1	2	TSeries-10292019-1106-013	electrical + opto	1	500	80	1	0.0946909
Scn1a-PV	61	2910	1	2	TSeries-10292019-1106-013	electrical + opto	1	500	81	1	0.295758
Scn1a-PV	61	2910	1	2	TSeries-10292019-1106-013	electrical + opto	1	500	82	1	0.217559
Scn1a-PV	61	2910	1	2	TSeries-10292019-1106-013	electrical + opto	1	500	83	1	0.290723
Scn1a-PV	61	2910	1	2	TSeries-10292019-1106-013	electrical + opto	1	500	84	0
Scn1a-PV	61	2910	1	2	TSeries-10292019-1106-013	electrical + opto	1	500	85	1	0.441256
Scn1a-PV	61	2910	1	2	TSeries-10292019-1106-013	electrical + opto	1	500	86	0
Scn1a-PV	61	2910	1	2	TSeries-10292019-1106-013	electrical + opto	1	500	87	0
Scn1a-PV	61	2910	1	2	TSeries-10292019-1106-013	electrical + opto	1	500	88	0
Scn1a-PV	61	2910	1	2	TSeries-10292019-1106-013	electrical + opto	1	500	89	0
Scn1a-PV	61	2910	1	2	TSeries-10292019-1106-013	electrical + opto	1	500	90	0
Scn1a-PV	61	2910	1	2	TSeries-10292019-1106-013	electrical + opto	1	500	91	0
Scn1a-PV	61	2910	1	2	TSeries-10292019-1106-013	electrical + opto	1	500	92	0
Scn1a-PV	61	2910	1	2	TSeries-10292019-1106-013	electrical + opto	1	500	93	0
Scn1a-PV	61	2910	1	2	TSeries-10292019-1106-013	electrical + opto	1	500	94	0
Scn1a-PV	61	2910	1	2	TSeries-10292019-1106-013	electrical + opto	1	500	95	0
Scn1a-PV	61	2910	1	2	TSeries-10292019-1106-013	electrical + opto	1	500	96	1	0.145126
Scn1a-PV	61	2910	1	2	TSeries-10292019-1106-013	electrical + opto	1	500	97	0
Scn1a-PV	61	2910	1	2	TSeries-10292019-1106-013	electrical + opto	1	500	98	1	0.245442
Scn1a-PV	61	2910	1	2	TSeries-10292019-1106-013	electrical + opto	1	500	99	1	0.33453
Scn1a-PV	61	2910	1	2	TSeries-10292019-1106-013	electrical + opto	1	500	100	0
Scn1a-PV	61	2910	1	2	TSeries-10292019-1106-013	electrical + opto	1	500	101	0
Scn1a-PV	61	2910	1	2	TSeries-10292019-1106-013	electrical + opto	1	500	102	0
Scn1a-PV	61	2910	1	2	TSeries-10292019-1106-013	electrical + opto	1	500	103	0
Scn1a-PV	61	2910	1	2	TSeries-10292019-1106-013	electrical + opto	1	500	104	0
Scn1a-PV	61	2910	1	2	TSeries-10292019-1106-013	electrical + opto	1	500	105	0
Scn1a-PV	61	2910	1	2	TSeries-10292019-1106-013	electrical + opto	1	500	106	0
Scn1a-PV	61	2910	1	2	TSeries-10292019-1106-013	electrical + opto	1	500	107	1	0.220895
Scn1a-PV	61	2910	1	2	TSeries-10292019-1106-013	electrical + opto	1	500	108	1	0.195292
Scn1a-PV	62	2909	1	1	TSeries-10312019-1006-007	electrical	1	500	0	0
Scn1a-PV	62	2909	1	1	TSeries-10312019-1006-007	electrical	1	500	1	1	0.3624
Scn1a-PV	62	2909	1	1	TSeries-10312019-1006-007	electrical	1	500	2	1	0.133755
Scn1a-PV	62	2909	1	1	TSeries-10312019-1006-007	electrical	1	500	3	0
Scn1a-PV	62	2909	1	1	TSeries-10312019-1006-007	electrical	1	500	4	1	0.440001
Scn1a-PV	62	2909	1	1	TSeries-10312019-1006-007	electrical	1	500	5	1	0.107367
Scn1a-PV	62	2909	1	1	TSeries-10312019-1006-007	electrical	1	500	6	0
Scn1a-PV	62	2909	1	1	TSeries-10312019-1006-007	electrical	1	500	7	1	0.170214
Scn1a-PV	62	2909	1	1	TSeries-10312019-1006-007	electrical	1	500	8	1	0.0869092
Scn1a-PV	62	2909	1	1	TSeries-10312019-1006-007	electrical	1	500	9	0
Scn1a-PV	62	2909	1	1	TSeries-10312019-1006-007	electrical	1	500	10	0
Scn1a-PV	62	2909	1	1	TSeries-10312019-1006-007	electrical	1	500	11	0
Scn1a-PV	62	2909	1	1	TSeries-10312019-1006-007	electrical	1	500	12	0
Scn1a-PV	62	2909	1	1	TSeries-10312019-1006-007	electrical	1	500	13	0
Scn1a-PV	62	2909	1	1	TSeries-10312019-1006-007	electrical	1	500	14	0
Scn1a-PV	62	2909	1	1	TSeries-10312019-1006-007	electrical	1	500	15	1	0.120971
Scn1a-PV	62	2909	1	1	TSeries-10312019-1006-007	electrical	1	500	16	0
Scn1a-PV	62	2909	1	1	TSeries-10312019-1006-007	electrical	1	500	17	1	0.391703
Scn1a-PV	62	2909	1	1	TSeries-10312019-1006-007	electrical	1	500	18	1	0.366001
Scn1a-PV	62	2909	1	1	TSeries-10312019-1006-007	electrical	1	500	19	0
Scn1a-PV	62	2909	1	1	TSeries-10312019-1006-007	electrical	1	500	20	0
Scn1a-PV	62	2909	1	1	TSeries-10312019-1006-007	electrical	1	500	21	0
Scn1a-PV	62	2909	1	1	TSeries-10312019-1006-007	electrical	1	500	22	0
Scn1a-PV	62	2909	1	1	TSeries-10312019-1006-007	electrical	1	500	23	0
Scn1a-PV	62	2909	1	1	TSeries-10312019-1006-007	electrical	1	500	24	0
Scn1a-PV	62	2909	1	1	TSeries-10312019-1006-007	electrical	1	500	25	0
Scn1a-PV	62	2909	1	1	TSeries-10312019-1006-007	electrical	1	500	26	1	0.365518
Scn1a-PV	62	2909	1	1	TSeries-10312019-1006-007	electrical	1	500	27	0
Scn1a-PV	62	2909	1	1	TSeries-10312019-1006-007	electrical	1	500	28	0
Scn1a-PV	62	2909	1	1	TSeries-10312019-1006-007	electrical	1	500	29	0
Scn1a-PV	62	2909	1	1	TSeries-10312019-1006-007	electrical	1	500	30	0
Scn1a-PV	62	2909	1	1	TSeries-10312019-1006-007	electrical	1	500	31	0
Scn1a-PV	62	2909	1	1	TSeries-10312019-1006-007	electrical	1	500	32	0
Scn1a-PV	62	2909	1	1	TSeries-10312019-1006-007	electrical	1	500	33	0
Scn1a-PV	62	2909	1	1	TSeries-10312019-1006-007	electrical	1	500	34	1	0.0677873
Scn1a-PV	62	2909	1	1	TSeries-10312019-1006-007	electrical	1	500	35	1	0.0672799
Scn1a-PV	62	2909	1	1	TSeries-10312019-1006-007	electrical	1	500	36	0
Scn1a-PV	62	2909	1	1	TSeries-10312019-1006-007	electrical	1	500	37	0
Scn1a-PV	62	2909	1	1	TSeries-10312019-1006-007	electrical	1	500	38	0
Scn1a-PV	62	2909	1	1	TSeries-10312019-1006-007	electrical	1	500	39	0
Scn1a-PV	62	2909	1	1	TSeries-10312019-1006-007	electrical	1	500	40	0
Scn1a-PV	62	2909	1	1	TSeries-10312019-1006-007	electrical	1	500	41	0
Scn1a-PV	62	2909	1	1	TSeries-10312019-1006-007	electrical	1	500	42	0
Scn1a-PV	62	2909	1	1	TSeries-10312019-1006-007	electrical	1	500	43	0
Scn1a-PV	62	2909	1	1	TSeries-10312019-1006-007	electrical	1	500	44	0
Scn1a-PV	62	2909	1	1	TSeries-10312019-1006-007	electrical	1	500	45	0
Scn1a-PV	62	2909	1	1	TSeries-10312019-1006-007	electrical	1	500	46	0
Scn1a-PV	62	2909	1	1	TSeries-10312019-1006-007	electrical	1	500	47	0
Scn1a-PV	62	2909	1	1	TSeries-10312019-1006-007	electrical	1	500	48	0
Scn1a-PV	62	2909	1	1	TSeries-10312019-1006-007	electrical	1	500	49	0
Scn1a-PV	62	2909	1	1	TSeries-10312019-1006-007	electrical	1	500	50	0
Scn1a-PV	62	2909	1	1	TSeries-10312019-1006-007	electrical	1	500	51	0
Scn1a-PV	62	2909	1	1	TSeries-10312019-1006-007	electrical	1	500	52	0
Scn1a-PV	62	2909	1	1	TSeries-10312019-1006-007	electrical	1	500	53	0
Scn1a-PV	62	2909	1	1	TSeries-10312019-1006-007	electrical	1	500	54	0
Scn1a-PV	62	2909	1	1	TSeries-10312019-1006-007	electrical	1	500	55	0
Scn1a-PV	62	2909	1	1	TSeries-10312019-1006-007	electrical	1	500	56	0
Scn1a-PV	62	2909	1	1	TSeries-10312019-1006-007	electrical	1	500	57	0
Scn1a-PV	62	2909	1	1	TSeries-10312019-1006-007	electrical	1	500	58	0
Scn1a-PV	62	2909	1	1	TSeries-10312019-1006-007	electrical	1	500	59	0
Scn1a-PV	62	2909	1	1	TSeries-10312019-1006-007	electrical	1	500	60	0
Scn1a-PV	62	2909	1	1	TSeries-10312019-1006-007	electrical	1	500	61	0
Scn1a-PV	62	2909	1	1	TSeries-10312019-1006-007	electrical	1	500	62	0
Scn1a-PV	62	2909	1	1	TSeries-10312019-1006-007	electrical	1	500	63	0
Scn1a-PV	62	2909	1	1	TSeries-10312019-1006-007	electrical	1	500	64	0
Scn1a-PV	62	2909	1	1	TSeries-10312019-1006-007	electrical	1	500	65	0
Scn1a-PV	62	2909	1	1	TSeries-10312019-1006-007	electrical	1	500	66	0
Scn1a-PV	62	2909	1	1	TSeries-10312019-1006-007	electrical	1	500	67	0
Scn1a-PV	62	2909	1	1	TSeries-10312019-1006-007	electrical	1	500	68	0
Scn1a-PV	62	2909	1	1	TSeries-10312019-1006-007	electrical	1	500	69	0
Scn1a-PV	62	2909	1	1	TSeries-10312019-1006-007	electrical	1	500	70	0
Scn1a-PV	62	2909	1	1	TSeries-10312019-1006-007	electrical	1	500	71	0
Scn1a-PV	62	2909	1	1	TSeries-10312019-1006-007	electrical	1	500	72	0
Scn1a-PV	62	2909	1	1	TSeries-10312019-1006-007	electrical	1	500	73	0
Scn1a-PV	62	2909	1	1	TSeries-10312019-1006-007	electrical	1	500	74	0
Scn1a-PV	62	2909	1	1	TSeries-10312019-1006-007	electrical	1	500	75	0
Scn1a-PV	62	2909	1	1	TSeries-10312019-1006-007	electrical	1	500	76	0
Scn1a-PV	62	2909	1	1	TSeries-10312019-1006-007	electrical	1	500	77	0
Scn1a-PV	62	2909	1	1	TSeries-10312019-1006-007	electrical	1	500	78	0
Scn1a-PV	62	2909	1	1	TSeries-10312019-1006-007	electrical	1	500	79	0
Scn1a-PV	62	2909	1	1	TSeries-10312019-1006-007	electrical	1	500	80	0
Scn1a-PV	62	2909	1	1	TSeries-10312019-1006-007	electrical	1	500	81	0
Scn1a-PV	62	2909	1	1	TSeries-10312019-1006-007	electrical	1	500	82	0
Scn1a-PV	62	2909	1	1	TSeries-10312019-1006-007	electrical	1	500	83	0
Scn1a-PV	62	2909	1	1	TSeries-10312019-1006-007	electrical	1	500	84	0
Scn1a-PV	62	2909	1	1	TSeries-10312019-1006-007	electrical	1	500	85	0
Scn1a-PV	62	2909	1	1	TSeries-10312019-1006-007	electrical	1	500	86	1	0.145733
Scn1a-PV	62	2909	1	1	TSeries-10312019-1006-007	electrical	1	500	87	1	0.285888
Scn1a-PV	62	2909	1	1	TSeries-10312019-1006-007	electrical	1	500	88	1	0.429634
Scn1a-PV	62	2909	1	1	TSeries-10312019-1006-007	electrical	1	500	89	0
Scn1a-PV	62	2909	1	1	TSeries-10312019-1006-007	electrical	1	500	90	1	0.204648
Scn1a-PV	62	2909	1	1	TSeries-10312019-1006-007	electrical	1	500	91	0
Scn1a-PV	62	2909	1	1	TSeries-10312019-1006-007	electrical	1	500	92	0
Scn1a-PV	62	2909	1	1	TSeries-10312019-1006-007	electrical	1	500	93	0
Scn1a-PV	62	2909	1	1	TSeries-10312019-1006-008	electrical + opto	1	500	0	0
Scn1a-PV	62	2909	1	1	TSeries-10312019-1006-008	electrical + opto	1	500	1	1	0.312501
Scn1a-PV	62	2909	1	1	TSeries-10312019-1006-008	electrical + opto	1	500	2	1	0.119157
Scn1a-PV	62	2909	1	1	TSeries-10312019-1006-008	electrical + opto	1	500	3	0
Scn1a-PV	62	2909	1	1	TSeries-10312019-1006-008	electrical + opto	1	500	4	0
Scn1a-PV	62	2909	1	1	TSeries-10312019-1006-008	electrical + opto	1	500	5	0
Scn1a-PV	62	2909	1	1	TSeries-10312019-1006-008	electrical + opto	1	500	6	0
Scn1a-PV	62	2909	1	1	TSeries-10312019-1006-008	electrical + opto	1	500	7	0
Scn1a-PV	62	2909	1	1	TSeries-10312019-1006-008	electrical + opto	1	500	8	0
Scn1a-PV	62	2909	1	1	TSeries-10312019-1006-008	electrical + opto	1	500	9	0
Scn1a-PV	62	2909	1	1	TSeries-10312019-1006-008	electrical + opto	1	500	10	0
Scn1a-PV	62	2909	1	1	TSeries-10312019-1006-008	electrical + opto	1	500	11	0
Scn1a-PV	62	2909	1	1	TSeries-10312019-1006-008	electrical + opto	1	500	12	0
Scn1a-PV	62	2909	1	1	TSeries-10312019-1006-008	electrical + opto	1	500	13	0
Scn1a-PV	62	2909	1	1	TSeries-10312019-1006-008	electrical + opto	1	500	14	0
Scn1a-PV	62	2909	1	1	TSeries-10312019-1006-008	electrical + opto	1	500	15	0
Scn1a-PV	62	2909	1	1	TSeries-10312019-1006-008	electrical + opto	1	500	16	0
Scn1a-PV	62	2909	1	1	TSeries-10312019-1006-008	electrical + opto	1	500	17	0
Scn1a-PV	62	2909	1	1	TSeries-10312019-1006-008	electrical + opto	1	500	18	0
Scn1a-PV	62	2909	1	1	TSeries-10312019-1006-008	electrical + opto	1	500	19	0
Scn1a-PV	62	2909	1	1	TSeries-10312019-1006-008	electrical + opto	1	500	20	0
Scn1a-PV	62	2909	1	1	TSeries-10312019-1006-008	electrical + opto	1	500	21	0
Scn1a-PV	62	2909	1	1	TSeries-10312019-1006-008	electrical + opto	1	500	22	0
Scn1a-PV	62	2909	1	1	TSeries-10312019-1006-008	electrical + opto	1	500	23	0
Scn1a-PV	62	2909	1	1	TSeries-10312019-1006-008	electrical + opto	1	500	24	0
Scn1a-PV	62	2909	1	1	TSeries-10312019-1006-008	electrical + opto	1	500	25	0
Scn1a-PV	62	2909	1	1	TSeries-10312019-1006-008	electrical + opto	1	500	26	0
Scn1a-PV	62	2909	1	1	TSeries-10312019-1006-008	electrical + opto	1	500	27	0
Scn1a-PV	62	2909	1	1	TSeries-10312019-1006-008	electrical + opto	1	500	28	0
Scn1a-PV	62	2909	1	1	TSeries-10312019-1006-008	electrical + opto	1	500	29	0
Scn1a-PV	62	2909	1	1	TSeries-10312019-1006-008	electrical + opto	1	500	30	0
Scn1a-PV	62	2909	1	1	TSeries-10312019-1006-008	electrical + opto	1	500	31	0
Scn1a-PV	62	2909	1	1	TSeries-10312019-1006-008	electrical + opto	1	500	32	0
Scn1a-PV	62	2909	1	1	TSeries-10312019-1006-008	electrical + opto	1	500	33	0
Scn1a-PV	62	2909	1	1	TSeries-10312019-1006-008	electrical + opto	1	500	34	0
Scn1a-PV	62	2909	1	1	TSeries-10312019-1006-008	electrical + opto	1	500	35	0
Scn1a-PV	62	2909	1	1	TSeries-10312019-1006-008	electrical + opto	1	500	36	0
Scn1a-PV	62	2909	1	1	TSeries-10312019-1006-008	electrical + opto	1	500	37	0
Scn1a-PV	62	2909	1	1	TSeries-10312019-1006-008	electrical + opto	1	500	38	0
Scn1a-PV	62	2909	1	1	TSeries-10312019-1006-008	electrical + opto	1	500	39	0
Scn1a-PV	62	2909	1	1	TSeries-10312019-1006-008	electrical + opto	1	500	40	0
Scn1a-PV	62	2909	1	1	TSeries-10312019-1006-008	electrical + opto	1	500	41	0
Scn1a-PV	62	2909	1	1	TSeries-10312019-1006-008	electrical + opto	1	500	42	0
Scn1a-PV	62	2909	1	1	TSeries-10312019-1006-008	electrical + opto	1	500	43	0
Scn1a-PV	62	2909	1	1	TSeries-10312019-1006-008	electrical + opto	1	500	44	1	0.0859973
Scn1a-PV	62	2909	1	1	TSeries-10312019-1006-008	electrical + opto	1	500	45	0
Scn1a-PV	62	2909	1	1	TSeries-10312019-1006-008	electrical + opto	1	500	46	0
Scn1a-PV	62	2909	1	1	TSeries-10312019-1006-008	electrical + opto	1	500	47	0
Scn1a-PV	62	2909	1	1	TSeries-10312019-1006-008	electrical + opto	1	500	48	0
Scn1a-PV	62	2909	1	1	TSeries-10312019-1006-008	electrical + opto	1	500	49	0
Scn1a-PV	62	2909	1	1	TSeries-10312019-1006-008	electrical + opto	1	500	50	0
Scn1a-PV	62	2909	1	1	TSeries-10312019-1006-008	electrical + opto	1	500	51	0
Scn1a-PV	62	2909	1	1	TSeries-10312019-1006-008	electrical + opto	1	500	52	0
Scn1a-PV	62	2909	1	1	TSeries-10312019-1006-008	electrical + opto	1	500	53	1	0.104147
Scn1a-PV	62	2909	1	1	TSeries-10312019-1006-008	electrical + opto	1	500	54	1	0.112979
Scn1a-PV	62	2909	1	1	TSeries-10312019-1006-008	electrical + opto	1	500	55	0
Scn1a-PV	62	2909	1	1	TSeries-10312019-1006-008	electrical + opto	1	500	56	0
Scn1a-PV	62	2909	1	1	TSeries-10312019-1006-008	electrical + opto	1	500	57	0
Scn1a-PV	62	2909	1	1	TSeries-10312019-1006-008	electrical + opto	1	500	58	0
Scn1a-PV	62	2909	1	1	TSeries-10312019-1006-008	electrical + opto	1	500	59	0
Scn1a-PV	62	2909	1	1	TSeries-10312019-1006-008	electrical + opto	1	500	60	0
Scn1a-PV	62	2909	1	1	TSeries-10312019-1006-008	electrical + opto	1	500	61	0
Scn1a-PV	62	2909	1	1	TSeries-10312019-1006-008	electrical + opto	1	500	62	0
Scn1a-PV	62	2909	1	1	TSeries-10312019-1006-008	electrical + opto	1	500	63	0
Scn1a-PV	62	2909	1	1	TSeries-10312019-1006-008	electrical + opto	1	500	64	0
Scn1a-PV	62	2909	1	1	TSeries-10312019-1006-008	electrical + opto	1	500	65	0
Scn1a-PV	62	2909	1	1	TSeries-10312019-1006-008	electrical + opto	1	500	66	0
Scn1a-PV	62	2909	1	1	TSeries-10312019-1006-008	electrical + opto	1	500	67	0
Scn1a-PV	62	2909	1	1	TSeries-10312019-1006-008	electrical + opto	1	500	68	0
Scn1a-PV	62	2909	1	1	TSeries-10312019-1006-008	electrical + opto	1	500	69	0
Scn1a-PV	62	2909	1	1	TSeries-10312019-1006-008	electrical + opto	1	500	70	0
Scn1a-PV	62	2909	1	1	TSeries-10312019-1006-008	electrical + opto	1	500	71	0
Scn1a-PV	62	2909	1	1	TSeries-10312019-1006-008	electrical + opto	1	500	72	1	0.0937185
Scn1a-PV	62	2909	1	1	TSeries-10312019-1006-008	electrical + opto	1	500	73	1	0.109807
Scn1a-PV	62	2909	1	1	TSeries-10312019-1006-008	electrical + opto	1	500	74	1	0.0945745
Scn1a-PV	62	2909	1	1	TSeries-10312019-1006-008	electrical + opto	1	500	75	0
Scn1a-PV	62	2909	1	1	TSeries-10312019-1006-008	electrical + opto	1	500	76	0
Scn1a-PV	62	2909	1	1	TSeries-10312019-1006-008	electrical + opto	1	500	77	0
Scn1a-PV	62	2909	1	1	TSeries-10312019-1006-008	electrical + opto	1	500	78	0
Scn1a-PV	62	2909	1	1	TSeries-10312019-1006-008	electrical + opto	1	500	79	0
Scn1a-PV	62	2909	1	1	TSeries-10312019-1006-008	electrical + opto	1	500	80	0
Scn1a-PV	62	2909	1	1	TSeries-10312019-1006-008	electrical + opto	1	500	81	1	0.109844
Scn1a-PV	62	2909	1	1	TSeries-10312019-1006-008	electrical + opto	1	500	82	0
Scn1a-PV	62	2909	1	1	TSeries-10312019-1006-008	electrical + opto	1	500	83	0
Scn1a-PV	62	2909	1	1	TSeries-10312019-1006-008	electrical + opto	1	500	84	0
Scn1a-PV	62	2909	1	1	TSeries-10312019-1006-008	electrical + opto	1	500	85	0
Scn1a-PV	62	2909	1	1	TSeries-10312019-1006-008	electrical + opto	1	500	86	0
Scn1a-PV	62	2909	1	1	TSeries-10312019-1006-008	electrical + opto	1	500	87	0
Scn1a-PV	62	2909	1	1	TSeries-10312019-1006-008	electrical + opto	1	500	88	1	0.433591
Scn1a-PV	62	2909	1	1	TSeries-10312019-1006-008	electrical + opto	1	500	89	0
Scn1a-PV	62	2909	1	1	TSeries-10312019-1006-008	electrical + opto	1	500	90	0
Scn1a-PV	62	2909	1	1	TSeries-10312019-1006-008	electrical + opto	1	500	91	0
Scn1a-PV	62	2909	1	1	TSeries-10312019-1006-008	electrical + opto	1	500	92	0
Scn1a-PV	62	2909	1	1	TSeries-10312019-1006-008	electrical + opto	1	500	93	0
Scn1a-PV	62	2909	1	2	TSeries-10312019-1006-020	electrical	1	500	0	0
Scn1a-PV	62	2909	1	2	TSeries-10312019-1006-020	electrical	1	500	1	0
Scn1a-PV	62	2909	1	2	TSeries-10312019-1006-020	electrical	1	500	2	0
Scn1a-PV	62	2909	1	2	TSeries-10312019-1006-020	electrical	1	500	3	0
Scn1a-PV	62	2909	1	2	TSeries-10312019-1006-020	electrical	1	500	4	0
Scn1a-PV	62	2909	1	2	TSeries-10312019-1006-020	electrical	1	500	5	0
Scn1a-PV	62	2909	1	2	TSeries-10312019-1006-020	electrical	1	500	6	0
Scn1a-PV	62	2909	1	2	TSeries-10312019-1006-020	electrical	1	500	7	0
Scn1a-PV	62	2909	1	2	TSeries-10312019-1006-020	electrical	1	500	8	0
Scn1a-PV	62	2909	1	2	TSeries-10312019-1006-020	electrical	1	500	9	0
Scn1a-PV	62	2909	1	2	TSeries-10312019-1006-020	electrical	1	500	10	0
Scn1a-PV	62	2909	1	2	TSeries-10312019-1006-020	electrical	1	500	11	0
Scn1a-PV	62	2909	1	2	TSeries-10312019-1006-020	electrical	1	500	12	0
Scn1a-PV	62	2909	1	2	TSeries-10312019-1006-020	electrical	1	500	13	0
Scn1a-PV	62	2909	1	2	TSeries-10312019-1006-020	electrical	1	500	14	0
Scn1a-PV	62	2909	1	2	TSeries-10312019-1006-020	electrical	1	500	15	0
Scn1a-PV	62	2909	1	2	TSeries-10312019-1006-020	electrical	1	500	16	0
Scn1a-PV	62	2909	1	2	TSeries-10312019-1006-020	electrical	1	500	17	0
Scn1a-PV	62	2909	1	2	TSeries-10312019-1006-020	electrical	1	500	18	1	0.146182
Scn1a-PV	62	2909	1	2	TSeries-10312019-1006-020	electrical	1	500	19	0
Scn1a-PV	62	2909	1	2	TSeries-10312019-1006-020	electrical	1	500	20	0
Scn1a-PV	62	2909	1	2	TSeries-10312019-1006-020	electrical	1	500	21	0
Scn1a-PV	62	2909	1	2	TSeries-10312019-1006-020	electrical	1	500	22	0
Scn1a-PV	62	2909	1	2	TSeries-10312019-1006-020	electrical	1	500	23	0
Scn1a-PV	62	2909	1	2	TSeries-10312019-1006-020	electrical	1	500	24	1	0.0919849
Scn1a-PV	62	2909	1	2	TSeries-10312019-1006-020	electrical	1	500	25	0
Scn1a-PV	62	2909	1	2	TSeries-10312019-1006-020	electrical	1	500	26	1	0.174688
Scn1a-PV	62	2909	1	2	TSeries-10312019-1006-020	electrical	1	500	27	1	0.132532
Scn1a-PV	62	2909	1	2	TSeries-10312019-1006-020	electrical	1	500	28	1	0.388392
Scn1a-PV	62	2909	1	2	TSeries-10312019-1006-020	electrical	1	500	29	1	0.1625
Scn1a-PV	62	2909	1	2	TSeries-10312019-1006-020	electrical	1	500	30	1	0.495708
Scn1a-PV	62	2909	1	2	TSeries-10312019-1006-020	electrical	1	500	31	1	0.23277
Scn1a-PV	62	2909	1	2	TSeries-10312019-1006-020	electrical	1	500	32	1	0.239654
Scn1a-PV	62	2909	1	2	TSeries-10312019-1006-020	electrical	1	500	33	0
Scn1a-PV	62	2909	1	2	TSeries-10312019-1006-020	electrical	1	500	34	0
Scn1a-PV	62	2909	1	2	TSeries-10312019-1006-020	electrical	1	500	35	0
Scn1a-PV	62	2909	1	2	TSeries-10312019-1006-020	electrical	1	500	36	1	0.523447
Scn1a-PV	62	2909	1	2	TSeries-10312019-1006-020	electrical	1	500	37	1	0.138568
Scn1a-PV	62	2909	1	2	TSeries-10312019-1006-020	electrical	1	500	38	1	0.231275
Scn1a-PV	62	2909	1	2	TSeries-10312019-1006-020	electrical	1	500	39	1	0.439882
Scn1a-PV	62	2909	1	2	TSeries-10312019-1006-020	electrical	1	500	40	1	0.163255
Scn1a-PV	62	2909	1	2	TSeries-10312019-1006-020	electrical	1	500	41	1	0.433686
Scn1a-PV	62	2909	1	2	TSeries-10312019-1006-020	electrical	1	500	42	1	0.178304
Scn1a-PV	62	2909	1	2	TSeries-10312019-1006-020	electrical	1	500	43	1	0.158619
Scn1a-PV	62	2909	1	2	TSeries-10312019-1006-020	electrical	1	500	44	0
Scn1a-PV	62	2909	1	2	TSeries-10312019-1006-020	electrical	1	500	45	0
Scn1a-PV	62	2909	1	2	TSeries-10312019-1006-020	electrical	1	500	46	0
Scn1a-PV	62	2909	1	2	TSeries-10312019-1006-020	electrical	1	500	47	0
Scn1a-PV	62	2909	1	2	TSeries-10312019-1006-020	electrical	1	500	48	0
Scn1a-PV	62	2909	1	2	TSeries-10312019-1006-020	electrical	1	500	49	1	0.483234
Scn1a-PV	62	2909	1	2	TSeries-10312019-1006-020	electrical	1	500	50	0
Scn1a-PV	62	2909	1	2	TSeries-10312019-1006-020	electrical	1	500	51	0
Scn1a-PV	62	2909	1	2	TSeries-10312019-1006-020	electrical	1	500	52	1	0.132091
Scn1a-PV	62	2909	1	2	TSeries-10312019-1006-020	electrical	1	500	53	0
Scn1a-PV	62	2909	1	2	TSeries-10312019-1006-020	electrical	1	500	54	0
Scn1a-PV	62	2909	1	2	TSeries-10312019-1006-020	electrical	1	500	55	0
Scn1a-PV	62	2909	1	2	TSeries-10312019-1006-020	electrical	1	500	56	0
Scn1a-PV	62	2909	1	2	TSeries-10312019-1006-020	electrical	1	500	57	0
Scn1a-PV	62	2909	1	2	TSeries-10312019-1006-020	electrical	1	500	58	0
Scn1a-PV	62	2909	1	2	TSeries-10312019-1006-020	electrical	1	500	59	0
Scn1a-PV	62	2909	1	2	TSeries-10312019-1006-020	electrical	1	500	60	0
Scn1a-PV	62	2909	1	2	TSeries-10312019-1006-020	electrical	1	500	61	0
Scn1a-PV	62	2909	1	2	TSeries-10312019-1006-020	electrical	1	500	62	0
Scn1a-PV	62	2909	1	2	TSeries-10312019-1006-020	electrical	1	500	63	0
Scn1a-PV	62	2909	1	2	TSeries-10312019-1006-020	electrical	1	500	64	0
Scn1a-PV	62	2909	1	2	TSeries-10312019-1006-020	electrical	1	500	65	0
Scn1a-PV	62	2909	1	2	TSeries-10312019-1006-020	electrical	1	500	66	0
Scn1a-PV	62	2909	1	2	TSeries-10312019-1006-020	electrical	1	500	67	0
Scn1a-PV	62	2909	1	2	TSeries-10312019-1006-020	electrical	1	500	68	0
Scn1a-PV	62	2909	1	2	TSeries-10312019-1006-020	electrical	1	500	69	0
Scn1a-PV	62	2909	1	2	TSeries-10312019-1006-020	electrical	1	500	70	0
Scn1a-PV	62	2909	1	2	TSeries-10312019-1006-020	electrical	1	500	71	0
Scn1a-PV	62	2909	1	2	TSeries-10312019-1006-020	electrical	1	500	72	0
Scn1a-PV	62	2909	1	2	TSeries-10312019-1006-020	electrical	1	500	73	0
Scn1a-PV	62	2909	1	2	TSeries-10312019-1006-020	electrical	1	500	74	0
Scn1a-PV	62	2909	1	2	TSeries-10312019-1006-020	electrical	1	500	75	0
Scn1a-PV	62	2909	1	2	TSeries-10312019-1006-020	electrical	1	500	76	0
Scn1a-PV	62	2909	1	2	TSeries-10312019-1006-020	electrical	1	500	77	0
Scn1a-PV	62	2909	1	2	TSeries-10312019-1006-020	electrical	1	500	78	0
Scn1a-PV	62	2909	1	2	TSeries-10312019-1006-020	electrical	1	500	79	0
Scn1a-PV	62	2909	1	2	TSeries-10312019-1006-020	electrical	1	500	80	0
Scn1a-PV	62	2909	1	2	TSeries-10312019-1006-020	electrical	1	500	81	0
Scn1a-PV	62	2909	1	2	TSeries-10312019-1006-020	electrical	1	500	82	0
Scn1a-PV	62	2909	1	2	TSeries-10312019-1006-020	electrical	1	500	83	0
Scn1a-PV	62	2909	1	2	TSeries-10312019-1006-020	electrical	1	500	84	0
Scn1a-PV	62	2909	1	2	TSeries-10312019-1006-020	electrical	1	500	85	0
Scn1a-PV	62	2909	1	2	TSeries-10312019-1006-020	electrical	1	500	86	0
Scn1a-PV	62	2909	1	2	TSeries-10312019-1006-020	electrical	1	500	87	0
Scn1a-PV	62	2909	1	2	TSeries-10312019-1006-020	electrical	1	500	88	0
Scn1a-PV	62	2909	1	2	TSeries-10312019-1006-020	electrical	1	500	89	0
Scn1a-PV	62	2909	1	2	TSeries-10312019-1006-020	electrical	1	500	90	0
Scn1a-PV	62	2909	1	2	TSeries-10312019-1006-020	electrical	1	500	91	0
Scn1a-PV	62	2909	1	2	TSeries-10312019-1006-020	electrical	1	500	92	0
Scn1a-PV	62	2909	1	2	TSeries-10312019-1006-020	electrical	1	500	93	0
Scn1a-PV	62	2909	1	2	TSeries-10312019-1006-020	electrical	1	500	94	0
Scn1a-PV	62	2909	1	2	TSeries-10312019-1006-020	electrical	1	500	95	0
Scn1a-PV	62	2909	1	2	TSeries-10312019-1006-020	electrical	1	500	96	0
Scn1a-PV	62	2909	1	2	TSeries-10312019-1006-020	electrical	1	500	97	0
Scn1a-PV	62	2909	1	2	TSeries-10312019-1006-020	electrical	1	500	98	0
Scn1a-PV	62	2909	1	2	TSeries-10312019-1006-020	electrical	1	500	99	0
Scn1a-PV	62	2909	1	2	TSeries-10312019-1006-020	electrical	1	500	100	0
Scn1a-PV	62	2909	1	2	TSeries-10312019-1006-020	electrical	1	500	101	0
Scn1a-PV	62	2909	1	2	TSeries-10312019-1006-020	electrical	1	500	102	0
Scn1a-PV	62	2909	1	2	TSeries-10312019-1006-020	electrical	1	500	103	0
Scn1a-PV	62	2909	1	2	TSeries-10312019-1006-020	electrical	1	500	104	0
Scn1a-PV	62	2909	1	2	TSeries-10312019-1006-020	electrical	1	500	105	0
Scn1a-PV	62	2909	1	2	TSeries-10312019-1006-020	electrical	1	500	106	0
Scn1a-PV	62	2909	1	2	TSeries-10312019-1006-021	electrical + opto	1	500	0	0
Scn1a-PV	62	2909	1	2	TSeries-10312019-1006-021	electrical + opto	1	500	1	1	0.196393
Scn1a-PV	62	2909	1	2	TSeries-10312019-1006-021	electrical + opto	1	500	2	0
Scn1a-PV	62	2909	1	2	TSeries-10312019-1006-021	electrical + opto	1	500	3	0
Scn1a-PV	62	2909	1	2	TSeries-10312019-1006-021	electrical + opto	1	500	4	0
Scn1a-PV	62	2909	1	2	TSeries-10312019-1006-021	electrical + opto	1	500	5	0
Scn1a-PV	62	2909	1	2	TSeries-10312019-1006-021	electrical + opto	1	500	6	0
Scn1a-PV	62	2909	1	2	TSeries-10312019-1006-021	electrical + opto	1	500	7	0
Scn1a-PV	62	2909	1	2	TSeries-10312019-1006-021	electrical + opto	1	500	8	0
Scn1a-PV	62	2909	1	2	TSeries-10312019-1006-021	electrical + opto	1	500	9	0
Scn1a-PV	62	2909	1	2	TSeries-10312019-1006-021	electrical + opto	1	500	10	0
Scn1a-PV	62	2909	1	2	TSeries-10312019-1006-021	electrical + opto	1	500	11	0
Scn1a-PV	62	2909	1	2	TSeries-10312019-1006-021	electrical + opto	1	500	12	0
Scn1a-PV	62	2909	1	2	TSeries-10312019-1006-021	electrical + opto	1	500	13	0
Scn1a-PV	62	2909	1	2	TSeries-10312019-1006-021	electrical + opto	1	500	14	0
Scn1a-PV	62	2909	1	2	TSeries-10312019-1006-021	electrical + opto	1	500	15	0
Scn1a-PV	62	2909	1	2	TSeries-10312019-1006-021	electrical + opto	1	500	16	0
Scn1a-PV	62	2909	1	2	TSeries-10312019-1006-021	electrical + opto	1	500	17	0
Scn1a-PV	62	2909	1	2	TSeries-10312019-1006-021	electrical + opto	1	500	18	1	0.192332
Scn1a-PV	62	2909	1	2	TSeries-10312019-1006-021	electrical + opto	1	500	19	0
Scn1a-PV	62	2909	1	2	TSeries-10312019-1006-021	electrical + opto	1	500	20	1	0.139766
Scn1a-PV	62	2909	1	2	TSeries-10312019-1006-021	electrical + opto	1	500	21	0
Scn1a-PV	62	2909	1	2	TSeries-10312019-1006-021	electrical + opto	1	500	22	0
Scn1a-PV	62	2909	1	2	TSeries-10312019-1006-021	electrical + opto	1	500	23	0
Scn1a-PV	62	2909	1	2	TSeries-10312019-1006-021	electrical + opto	1	500	24	0
Scn1a-PV	62	2909	1	2	TSeries-10312019-1006-021	electrical + opto	1	500	25	1	0.119562
Scn1a-PV	62	2909	1	2	TSeries-10312019-1006-021	electrical + opto	1	500	26	0
Scn1a-PV	62	2909	1	2	TSeries-10312019-1006-021	electrical + opto	1	500	27	1	0.134177
Scn1a-PV	62	2909	1	2	TSeries-10312019-1006-021	electrical + opto	1	500	28	0
Scn1a-PV	62	2909	1	2	TSeries-10312019-1006-021	electrical + opto	1	500	29	0
Scn1a-PV	62	2909	1	2	TSeries-10312019-1006-021	electrical + opto	1	500	30	0
Scn1a-PV	62	2909	1	2	TSeries-10312019-1006-021	electrical + opto	1	500	31	0
Scn1a-PV	62	2909	1	2	TSeries-10312019-1006-021	electrical + opto	1	500	32	0
Scn1a-PV	62	2909	1	2	TSeries-10312019-1006-021	electrical + opto	1	500	33	0
Scn1a-PV	62	2909	1	2	TSeries-10312019-1006-021	electrical + opto	1	500	34	0
Scn1a-PV	62	2909	1	2	TSeries-10312019-1006-021	electrical + opto	1	500	35	0
Scn1a-PV	62	2909	1	2	TSeries-10312019-1006-021	electrical + opto	1	500	36	0
Scn1a-PV	62	2909	1	2	TSeries-10312019-1006-021	electrical + opto	1	500	37	0
Scn1a-PV	62	2909	1	2	TSeries-10312019-1006-021	electrical + opto	1	500	38	0
Scn1a-PV	62	2909	1	2	TSeries-10312019-1006-021	electrical + opto	1	500	39	0
Scn1a-PV	62	2909	1	2	TSeries-10312019-1006-021	electrical + opto	1	500	40	0
Scn1a-PV	62	2909	1	2	TSeries-10312019-1006-021	electrical + opto	1	500	41	1	0.128741
Scn1a-PV	62	2909	1	2	TSeries-10312019-1006-021	electrical + opto	1	500	42	0
Scn1a-PV	62	2909	1	2	TSeries-10312019-1006-021	electrical + opto	1	500	43	0
Scn1a-PV	62	2909	1	2	TSeries-10312019-1006-021	electrical + opto	1	500	44	0
Scn1a-PV	62	2909	1	2	TSeries-10312019-1006-021	electrical + opto	1	500	45	0
Scn1a-PV	62	2909	1	2	TSeries-10312019-1006-021	electrical + opto	1	500	46	0
Scn1a-PV	62	2909	1	2	TSeries-10312019-1006-021	electrical + opto	1	500	47	0
Scn1a-PV	62	2909	1	2	TSeries-10312019-1006-021	electrical + opto	1	500	48	0
Scn1a-PV	62	2909	1	2	TSeries-10312019-1006-021	electrical + opto	1	500	49	0
Scn1a-PV	62	2909	1	2	TSeries-10312019-1006-021	electrical + opto	1	500	50	0
Scn1a-PV	62	2909	1	2	TSeries-10312019-1006-021	electrical + opto	1	500	51	0
Scn1a-PV	62	2909	1	2	TSeries-10312019-1006-021	electrical + opto	1	500	52	1	0.113109
Scn1a-PV	62	2909	1	2	TSeries-10312019-1006-021	electrical + opto	1	500	53	0
Scn1a-PV	62	2909	1	2	TSeries-10312019-1006-021	electrical + opto	1	500	54	0
Scn1a-PV	62	2909	1	2	TSeries-10312019-1006-021	electrical + opto	1	500	55	0
Scn1a-PV	62	2909	1	2	TSeries-10312019-1006-021	electrical + opto	1	500	56	0
Scn1a-PV	62	2909	1	2	TSeries-10312019-1006-021	electrical + opto	1	500	57	0
Scn1a-PV	62	2909	1	2	TSeries-10312019-1006-021	electrical + opto	1	500	58	0
Scn1a-PV	62	2909	1	2	TSeries-10312019-1006-021	electrical + opto	1	500	59	0
Scn1a-PV	62	2909	1	2	TSeries-10312019-1006-021	electrical + opto	1	500	60	0
Scn1a-PV	62	2909	1	2	TSeries-10312019-1006-021	electrical + opto	1	500	61	0
Scn1a-PV	62	2909	1	2	TSeries-10312019-1006-021	electrical + opto	1	500	62	0
Scn1a-PV	62	2909	1	2	TSeries-10312019-1006-021	electrical + opto	1	500	63	0
Scn1a-PV	62	2909	1	2	TSeries-10312019-1006-021	electrical + opto	1	500	64	0
Scn1a-PV	62	2909	1	2	TSeries-10312019-1006-021	electrical + opto	1	500	65	0
Scn1a-PV	62	2909	1	2	TSeries-10312019-1006-021	electrical + opto	1	500	66	0
Scn1a-PV	62	2909	1	2	TSeries-10312019-1006-021	electrical + opto	1	500	67	0
Scn1a-PV	62	2909	1	2	TSeries-10312019-1006-021	electrical + opto	1	500	68	0
Scn1a-PV	62	2909	1	2	TSeries-10312019-1006-021	electrical + opto	1	500	69	0
Scn1a-PV	62	2909	1	2	TSeries-10312019-1006-021	electrical + opto	1	500	70	1	0.128813
Scn1a-PV	62	2909	1	2	TSeries-10312019-1006-021	electrical + opto	1	500	71	0
Scn1a-PV	62	2909	1	2	TSeries-10312019-1006-021	electrical + opto	1	500	72	0
Scn1a-PV	62	2909	1	2	TSeries-10312019-1006-021	electrical + opto	1	500	73	1	0.114503
Scn1a-PV	62	2909	1	2	TSeries-10312019-1006-021	electrical + opto	1	500	74	0
Scn1a-PV	62	2909	1	2	TSeries-10312019-1006-021	electrical + opto	1	500	75	0
Scn1a-PV	62	2909	1	2	TSeries-10312019-1006-021	electrical + opto	1	500	76	0
Scn1a-PV	62	2909	1	2	TSeries-10312019-1006-021	electrical + opto	1	500	77	0
Scn1a-PV	62	2909	1	2	TSeries-10312019-1006-021	electrical + opto	1	500	78	0
Scn1a-PV	62	2909	1	2	TSeries-10312019-1006-021	electrical + opto	1	500	79	0
Scn1a-PV	62	2909	1	2	TSeries-10312019-1006-021	electrical + opto	1	500	80	1	0.0967304
Scn1a-PV	62	2909	1	2	TSeries-10312019-1006-021	electrical + opto	1	500	81	0
Scn1a-PV	62	2909	1	2	TSeries-10312019-1006-021	electrical + opto	1	500	82	0
Scn1a-PV	62	2909	1	2	TSeries-10312019-1006-021	electrical + opto	1	500	83	0
Scn1a-PV	62	2909	1	2	TSeries-10312019-1006-021	electrical + opto	1	500	84	0
Scn1a-PV	62	2909	1	2	TSeries-10312019-1006-021	electrical + opto	1	500	85	0
Scn1a-PV	62	2909	1	2	TSeries-10312019-1006-021	electrical + opto	1	500	86	0
Scn1a-PV	62	2909	1	2	TSeries-10312019-1006-021	electrical + opto	1	500	87	1	0.129272
Scn1a-PV	62	2909	1	2	TSeries-10312019-1006-021	electrical + opto	1	500	88	0
Scn1a-PV	62	2909	1	2	TSeries-10312019-1006-021	electrical + opto	1	500	89	0
Scn1a-PV	62	2909	1	2	TSeries-10312019-1006-021	electrical + opto	1	500	90	0
Scn1a-PV	62	2909	1	2	TSeries-10312019-1006-021	electrical + opto	1	500	91	0
Scn1a-PV	62	2909	1	2	TSeries-10312019-1006-021	electrical + opto	1	500	92	0
Scn1a-PV	62	2909	1	2	TSeries-10312019-1006-021	electrical + opto	1	500	93	0
Scn1a-PV	62	2909	1	2	TSeries-10312019-1006-021	electrical + opto	1	500	94	0
Scn1a-PV	62	2909	1	2	TSeries-10312019-1006-021	electrical + opto	1	500	95	0
Scn1a-PV	62	2909	1	2	TSeries-10312019-1006-021	electrical + opto	1	500	96	0
Scn1a-PV	62	2909	1	2	TSeries-10312019-1006-021	electrical + opto	1	500	97	0
Scn1a-PV	62	2909	1	2	TSeries-10312019-1006-021	electrical + opto	1	500	98	0
Scn1a-PV	62	2909	1	2	TSeries-10312019-1006-021	electrical + opto	1	500	99	0
Scn1a-PV	62	2909	1	2	TSeries-10312019-1006-021	electrical + opto	1	500	100	0
Scn1a-PV	62	2909	1	2	TSeries-10312019-1006-021	electrical + opto	1	500	101	0
Scn1a-PV	62	2909	1	2	TSeries-10312019-1006-021	electrical + opto	1	500	102	0
Scn1a-PV	62	2909	1	2	TSeries-10312019-1006-021	electrical + opto	1	500	103	0
Scn1a-PV	62	2909	1	2	TSeries-10312019-1006-021	electrical + opto	1	500	104	0
Scn1a-PV	62	2909	1	2	TSeries-10312019-1006-021	electrical + opto	1	500	105	0
Scn1a-PV	62	2909	1	2	TSeries-10312019-1006-021	electrical + opto	1	500	106	0
Scn1a-PV	62	2909	1	3	TSeries-10312019-1006-043	electrical	1	500	0	0
Scn1a-PV	62	2909	1	3	TSeries-10312019-1006-043	electrical	1	500	1	0
Scn1a-PV	62	2909	1	3	TSeries-10312019-1006-043	electrical	1	500	2	0
Scn1a-PV	62	2909	1	3	TSeries-10312019-1006-043	electrical	1	500	3	0
Scn1a-PV	62	2909	1	3	TSeries-10312019-1006-043	electrical	1	500	4	0
Scn1a-PV	62	2909	1	3	TSeries-10312019-1006-043	electrical	1	500	5	0
Scn1a-PV	62	2909	1	3	TSeries-10312019-1006-043	electrical	1	500	6	0
Scn1a-PV	62	2909	1	3	TSeries-10312019-1006-043	electrical	1	500	7	0
Scn1a-PV	62	2909	1	3	TSeries-10312019-1006-043	electrical	1	500	8	1	0.0928347
Scn1a-PV	62	2909	1	3	TSeries-10312019-1006-043	electrical	1	500	9	1	0.311953
Scn1a-PV	62	2909	1	3	TSeries-10312019-1006-043	electrical	1	500	10	1	0.239045
Scn1a-PV	62	2909	1	3	TSeries-10312019-1006-043	electrical	1	500	11	0
Scn1a-PV	62	2909	1	3	TSeries-10312019-1006-043	electrical	1	500	12	0
Scn1a-PV	62	2909	1	3	TSeries-10312019-1006-043	electrical	1	500	13	0
Scn1a-PV	62	2909	1	3	TSeries-10312019-1006-043	electrical	1	500	14	0
Scn1a-PV	62	2909	1	3	TSeries-10312019-1006-043	electrical	1	500	15	0
Scn1a-PV	62	2909	1	3	TSeries-10312019-1006-043	electrical	1	500	16	0
Scn1a-PV	62	2909	1	3	TSeries-10312019-1006-043	electrical	1	500	17	0
Scn1a-PV	62	2909	1	3	TSeries-10312019-1006-043	electrical	1	500	18	0
Scn1a-PV	62	2909	1	3	TSeries-10312019-1006-043	electrical	1	500	19	0
Scn1a-PV	62	2909	1	3	TSeries-10312019-1006-043	electrical	1	500	20	0
Scn1a-PV	62	2909	1	3	TSeries-10312019-1006-043	electrical	1	500	21	0
Scn1a-PV	62	2909	1	3	TSeries-10312019-1006-043	electrical	1	500	22	0
Scn1a-PV	62	2909	1	3	TSeries-10312019-1006-043	electrical	1	500	23	0
Scn1a-PV	62	2909	1	3	TSeries-10312019-1006-043	electrical	1	500	24	0
Scn1a-PV	62	2909	1	3	TSeries-10312019-1006-043	electrical	1	500	25	0
Scn1a-PV	62	2909	1	3	TSeries-10312019-1006-043	electrical	1	500	26	0
Scn1a-PV	62	2909	1	3	TSeries-10312019-1006-043	electrical	1	500	27	0
Scn1a-PV	62	2909	1	3	TSeries-10312019-1006-043	electrical	1	500	28	0
Scn1a-PV	62	2909	1	3	TSeries-10312019-1006-043	electrical	1	500	29	0
Scn1a-PV	62	2909	1	3	TSeries-10312019-1006-043	electrical	1	500	30	1	0.179976
Scn1a-PV	62	2909	1	3	TSeries-10312019-1006-043	electrical	1	500	31	1	0.140844
Scn1a-PV	62	2909	1	3	TSeries-10312019-1006-043	electrical	1	500	32	1	0.175108
Scn1a-PV	62	2909	1	3	TSeries-10312019-1006-043	electrical	1	500	33	1	0.145452
Scn1a-PV	62	2909	1	3	TSeries-10312019-1006-043	electrical	1	500	34	1	0.309481
Scn1a-PV	62	2909	1	3	TSeries-10312019-1006-043	electrical	1	500	35	1	0.137162
Scn1a-PV	62	2909	1	3	TSeries-10312019-1006-043	electrical	1	500	36	0
Scn1a-PV	62	2909	1	3	TSeries-10312019-1006-043	electrical	1	500	37	0
Scn1a-PV	62	2909	1	3	TSeries-10312019-1006-043	electrical	1	500	38	0
Scn1a-PV	62	2909	1	3	TSeries-10312019-1006-043	electrical	1	500	39	1	0.208036
Scn1a-PV	62	2909	1	3	TSeries-10312019-1006-043	electrical	1	500	40	1	0.188347
Scn1a-PV	62	2909	1	3	TSeries-10312019-1006-043	electrical	1	500	41	1	0.260265
Scn1a-PV	62	2909	1	3	TSeries-10312019-1006-043	electrical	1	500	42	1	0.13373
Scn1a-PV	62	2909	1	3	TSeries-10312019-1006-043	electrical	1	500	43	1	0.218683
Scn1a-PV	62	2909	1	3	TSeries-10312019-1006-043	electrical	1	500	44	1	0.106519
Scn1a-PV	62	2909	1	3	TSeries-10312019-1006-043	electrical	1	500	45	0
Scn1a-PV	62	2909	1	3	TSeries-10312019-1006-043	electrical	1	500	46	1	0.37815
Scn1a-PV	62	2909	1	3	TSeries-10312019-1006-043	electrical	1	500	47	1	0.134817
Scn1a-PV	62	2909	1	3	TSeries-10312019-1006-043	electrical	1	500	48	0
Scn1a-PV	62	2909	1	3	TSeries-10312019-1006-043	electrical	1	500	49	0
Scn1a-PV	62	2909	1	3	TSeries-10312019-1006-043	electrical	1	500	50	0
Scn1a-PV	62	2909	1	3	TSeries-10312019-1006-043	electrical	1	500	51	0
Scn1a-PV	62	2909	1	3	TSeries-10312019-1006-043	electrical	1	500	52	0
Scn1a-PV	62	2909	1	3	TSeries-10312019-1006-043	electrical	1	500	53	0
Scn1a-PV	62	2909	1	3	TSeries-10312019-1006-043	electrical	1	500	54	0
Scn1a-PV	62	2909	1	3	TSeries-10312019-1006-043	electrical	1	500	55	0
Scn1a-PV	62	2909	1	3	TSeries-10312019-1006-043	electrical	1	500	56	0
Scn1a-PV	62	2909	1	3	TSeries-10312019-1006-043	electrical	1	500	57	0
Scn1a-PV	62	2909	1	3	TSeries-10312019-1006-043	electrical	1	500	58	0
Scn1a-PV	62	2909	1	3	TSeries-10312019-1006-043	electrical	1	500	59	0
Scn1a-PV	62	2909	1	3	TSeries-10312019-1006-043	electrical	1	500	60	0
Scn1a-PV	62	2909	1	3	TSeries-10312019-1006-043	electrical	1	500	61	0
Scn1a-PV	62	2909	1	3	TSeries-10312019-1006-043	electrical	1	500	62	0
Scn1a-PV	62	2909	1	3	TSeries-10312019-1006-043	electrical	1	500	63	0
Scn1a-PV	62	2909	1	3	TSeries-10312019-1006-043	electrical	1	500	64	0
Scn1a-PV	62	2909	1	3	TSeries-10312019-1006-043	electrical	1	500	65	0
Scn1a-PV	62	2909	1	3	TSeries-10312019-1006-043	electrical	1	500	66	0
Scn1a-PV	62	2909	1	3	TSeries-10312019-1006-043	electrical	1	500	67	0
Scn1a-PV	62	2909	1	3	TSeries-10312019-1006-043	electrical	1	500	68	0
Scn1a-PV	62	2909	1	3	TSeries-10312019-1006-043	electrical	1	500	69	0
Scn1a-PV	62	2909	1	3	TSeries-10312019-1006-043	electrical	1	500	70	0
Scn1a-PV	62	2909	1	3	TSeries-10312019-1006-043	electrical	1	500	71	0
Scn1a-PV	62	2909	1	3	TSeries-10312019-1006-043	electrical	1	500	72	0
Scn1a-PV	62	2909	1	3	TSeries-10312019-1006-043	electrical	1	500	73	0
Scn1a-PV	62	2909	1	3	TSeries-10312019-1006-043	electrical	1	500	74	0
Scn1a-PV	62	2909	1	3	TSeries-10312019-1006-043	electrical	1	500	75	0
Scn1a-PV	62	2909	1	3	TSeries-10312019-1006-043	electrical	1	500	76	0
Scn1a-PV	62	2909	1	3	TSeries-10312019-1006-043	electrical	1	500	77	0
Scn1a-PV	62	2909	1	3	TSeries-10312019-1006-043	electrical	1	500	78	0
Scn1a-PV	62	2909	1	3	TSeries-10312019-1006-043	electrical	1	500	79	0
Scn1a-PV	62	2909	1	3	TSeries-10312019-1006-043	electrical	1	500	80	0
Scn1a-PV	62	2909	1	3	TSeries-10312019-1006-043	electrical	1	500	81	0
Scn1a-PV	62	2909	1	3	TSeries-10312019-1006-043	electrical	1	500	82	0
Scn1a-PV	62	2909	1	3	TSeries-10312019-1006-043	electrical	1	500	83	0
Scn1a-PV	62	2909	1	3	TSeries-10312019-1006-043	electrical	1	500	84	0
Scn1a-PV	62	2909	1	3	TSeries-10312019-1006-043	electrical	1	500	85	0
Scn1a-PV	62	2909	1	3	TSeries-10312019-1006-043	electrical	1	500	86	0
Scn1a-PV	62	2909	1	3	TSeries-10312019-1006-043	electrical	1	500	87	0
Scn1a-PV	62	2909	1	3	TSeries-10312019-1006-043	electrical	1	500	88	0
Scn1a-PV	62	2909	1	3	TSeries-10312019-1006-043	electrical	1	500	89	0
Scn1a-PV	62	2909	1	3	TSeries-10312019-1006-043	electrical	1	500	90	0
Scn1a-PV	62	2909	1	3	TSeries-10312019-1006-043	electrical	1	500	91	0
Scn1a-PV	62	2909	1	3	TSeries-10312019-1006-043	electrical	1	500	92	0
Scn1a-PV	62	2909	1	3	TSeries-10312019-1006-043	electrical	1	500	93	0
Scn1a-PV	62	2909	1	3	TSeries-10312019-1006-043	electrical	1	500	94	0
Scn1a-PV	62	2909	1	3	TSeries-10312019-1006-043	electrical	1	500	95	0
Scn1a-PV	62	2909	1	3	TSeries-10312019-1006-043	electrical	1	500	96	0
Scn1a-PV	62	2909	1	3	TSeries-10312019-1006-043	electrical	1	500	97	0
Scn1a-PV	62	2909	1	3	TSeries-10312019-1006-043	electrical	1	500	98	0
Scn1a-PV	62	2909	1	3	TSeries-10312019-1006-043	electrical	1	500	99	0
Scn1a-PV	62	2909	1	3	TSeries-10312019-1006-043	electrical	1	500	100	0
Scn1a-PV	62	2909	1	3	TSeries-10312019-1006-043	electrical	1	500	101	0
Scn1a-PV	62	2909	1	3	TSeries-10312019-1006-043	electrical	1	500	102	1	0.143481
Scn1a-PV	62	2909	1	3	TSeries-10312019-1006-043	electrical	1	500	103	0
Scn1a-PV	62	2909	1	3	TSeries-10312019-1006-043	electrical	1	500	104	0
Scn1a-PV	62	2909	1	3	TSeries-10312019-1006-043	electrical	1	500	105	0
Scn1a-PV	62	2909	1	3	TSeries-10312019-1006-043	electrical	1	500	106	0
Scn1a-PV	62	2909	1	3	TSeries-10312019-1006-043	electrical	1	500	107	0
Scn1a-PV	62	2909	1	3	TSeries-10312019-1006-043	electrical	1	500	108	0
Scn1a-PV	62	2909	1	3	TSeries-10312019-1006-043	electrical	1	500	109	0
Scn1a-PV	62	2909	1	3	TSeries-10312019-1006-043	electrical	1	500	110	0
Scn1a-PV	62	2909	1	3	TSeries-10312019-1006-043	electrical	1	500	111	0
Scn1a-PV	62	2909	1	3	TSeries-10312019-1006-043	electrical	1	500	112	0
Scn1a-PV	62	2909	1	3	TSeries-10312019-1006-043	electrical	1	500	113	0
Scn1a-PV	62	2909	1	3	TSeries-10312019-1006-043	electrical	1	500	114	0
Scn1a-PV	62	2909	1	3	TSeries-10312019-1006-043	electrical	1	500	115	0
Scn1a-PV	62	2909	1	3	TSeries-10312019-1006-043	electrical	1	500	116	0
Scn1a-PV	62	2909	1	3	TSeries-10312019-1006-044	electrical + opto	1	500	0	0
Scn1a-PV	62	2909	1	3	TSeries-10312019-1006-044	electrical + opto	1	500	1	0
Scn1a-PV	62	2909	1	3	TSeries-10312019-1006-044	electrical + opto	1	500	2	0
Scn1a-PV	62	2909	1	3	TSeries-10312019-1006-044	electrical + opto	1	500	3	0
Scn1a-PV	62	2909	1	3	TSeries-10312019-1006-044	electrical + opto	1	500	4	0
Scn1a-PV	62	2909	1	3	TSeries-10312019-1006-044	electrical + opto	1	500	5	0
Scn1a-PV	62	2909	1	3	TSeries-10312019-1006-044	electrical + opto	1	500	6	0
Scn1a-PV	62	2909	1	3	TSeries-10312019-1006-044	electrical + opto	1	500	7	0
Scn1a-PV	62	2909	1	3	TSeries-10312019-1006-044	electrical + opto	1	500	8	0
Scn1a-PV	62	2909	1	3	TSeries-10312019-1006-044	electrical + opto	1	500	9	0
Scn1a-PV	62	2909	1	3	TSeries-10312019-1006-044	electrical + opto	1	500	10	0
Scn1a-PV	62	2909	1	3	TSeries-10312019-1006-044	electrical + opto	1	500	11	0
Scn1a-PV	62	2909	1	3	TSeries-10312019-1006-044	electrical + opto	1	500	12	0
Scn1a-PV	62	2909	1	3	TSeries-10312019-1006-044	electrical + opto	1	500	13	0
Scn1a-PV	62	2909	1	3	TSeries-10312019-1006-044	electrical + opto	1	500	14	0
Scn1a-PV	62	2909	1	3	TSeries-10312019-1006-044	electrical + opto	1	500	15	0
Scn1a-PV	62	2909	1	3	TSeries-10312019-1006-044	electrical + opto	1	500	16	0
Scn1a-PV	62	2909	1	3	TSeries-10312019-1006-044	electrical + opto	1	500	17	0
Scn1a-PV	62	2909	1	3	TSeries-10312019-1006-044	electrical + opto	1	500	18	0
Scn1a-PV	62	2909	1	3	TSeries-10312019-1006-044	electrical + opto	1	500	19	0
Scn1a-PV	62	2909	1	3	TSeries-10312019-1006-044	electrical + opto	1	500	20	0
Scn1a-PV	62	2909	1	3	TSeries-10312019-1006-044	electrical + opto	1	500	21	0
Scn1a-PV	62	2909	1	3	TSeries-10312019-1006-044	electrical + opto	1	500	22	0
Scn1a-PV	62	2909	1	3	TSeries-10312019-1006-044	electrical + opto	1	500	23	0
Scn1a-PV	62	2909	1	3	TSeries-10312019-1006-044	electrical + opto	1	500	24	0
Scn1a-PV	62	2909	1	3	TSeries-10312019-1006-044	electrical + opto	1	500	25	1	0.110525
Scn1a-PV	62	2909	1	3	TSeries-10312019-1006-044	electrical + opto	1	500	26	0
Scn1a-PV	62	2909	1	3	TSeries-10312019-1006-044	electrical + opto	1	500	27	0
Scn1a-PV	62	2909	1	3	TSeries-10312019-1006-044	electrical + opto	1	500	28	0
Scn1a-PV	62	2909	1	3	TSeries-10312019-1006-044	electrical + opto	1	500	29	0
Scn1a-PV	62	2909	1	3	TSeries-10312019-1006-044	electrical + opto	1	500	30	0
Scn1a-PV	62	2909	1	3	TSeries-10312019-1006-044	electrical + opto	1	500	31	0
Scn1a-PV	62	2909	1	3	TSeries-10312019-1006-044	electrical + opto	1	500	32	1	0.0872246
Scn1a-PV	62	2909	1	3	TSeries-10312019-1006-044	electrical + opto	1	500	33	0
Scn1a-PV	62	2909	1	3	TSeries-10312019-1006-044	electrical + opto	1	500	34	0
Scn1a-PV	62	2909	1	3	TSeries-10312019-1006-044	electrical + opto	1	500	35	0
Scn1a-PV	62	2909	1	3	TSeries-10312019-1006-044	electrical + opto	1	500	36	0
Scn1a-PV	62	2909	1	3	TSeries-10312019-1006-044	electrical + opto	1	500	37	0
Scn1a-PV	62	2909	1	3	TSeries-10312019-1006-044	electrical + opto	1	500	38	0
Scn1a-PV	62	2909	1	3	TSeries-10312019-1006-044	electrical + opto	1	500	39	0
Scn1a-PV	62	2909	1	3	TSeries-10312019-1006-044	electrical + opto	1	500	40	0
Scn1a-PV	62	2909	1	3	TSeries-10312019-1006-044	electrical + opto	1	500	41	0
Scn1a-PV	62	2909	1	3	TSeries-10312019-1006-044	electrical + opto	1	500	42	0
Scn1a-PV	62	2909	1	3	TSeries-10312019-1006-044	electrical + opto	1	500	43	0
Scn1a-PV	62	2909	1	3	TSeries-10312019-1006-044	electrical + opto	1	500	44	0
Scn1a-PV	62	2909	1	3	TSeries-10312019-1006-044	electrical + opto	1	500	45	0
Scn1a-PV	62	2909	1	3	TSeries-10312019-1006-044	electrical + opto	1	500	46	0
Scn1a-PV	62	2909	1	3	TSeries-10312019-1006-044	electrical + opto	1	500	47	0
Scn1a-PV	62	2909	1	3	TSeries-10312019-1006-044	electrical + opto	1	500	48	0
Scn1a-PV	62	2909	1	3	TSeries-10312019-1006-044	electrical + opto	1	500	49	0
Scn1a-PV	62	2909	1	3	TSeries-10312019-1006-044	electrical + opto	1	500	50	0
Scn1a-PV	62	2909	1	3	TSeries-10312019-1006-044	electrical + opto	1	500	51	0
Scn1a-PV	62	2909	1	3	TSeries-10312019-1006-044	electrical + opto	1	500	52	0
Scn1a-PV	62	2909	1	3	TSeries-10312019-1006-044	electrical + opto	1	500	53	0
Scn1a-PV	62	2909	1	3	TSeries-10312019-1006-044	electrical + opto	1	500	54	1	0.119109
Scn1a-PV	62	2909	1	3	TSeries-10312019-1006-044	electrical + opto	1	500	55	0
Scn1a-PV	62	2909	1	3	TSeries-10312019-1006-044	electrical + opto	1	500	56	0
Scn1a-PV	62	2909	1	3	TSeries-10312019-1006-044	electrical + opto	1	500	57	0
Scn1a-PV	62	2909	1	3	TSeries-10312019-1006-044	electrical + opto	1	500	58	0
Scn1a-PV	62	2909	1	3	TSeries-10312019-1006-044	electrical + opto	1	500	59	0
Scn1a-PV	62	2909	1	3	TSeries-10312019-1006-044	electrical + opto	1	500	60	0
Scn1a-PV	62	2909	1	3	TSeries-10312019-1006-044	electrical + opto	1	500	61	0
Scn1a-PV	62	2909	1	3	TSeries-10312019-1006-044	electrical + opto	1	500	62	0
Scn1a-PV	62	2909	1	3	TSeries-10312019-1006-044	electrical + opto	1	500	63	0
Scn1a-PV	62	2909	1	3	TSeries-10312019-1006-044	electrical + opto	1	500	64	0
Scn1a-PV	62	2909	1	3	TSeries-10312019-1006-044	electrical + opto	1	500	65	0
Scn1a-PV	62	2909	1	3	TSeries-10312019-1006-044	electrical + opto	1	500	66	1	0.120588
Scn1a-PV	62	2909	1	3	TSeries-10312019-1006-044	electrical + opto	1	500	67	1	0.150029
Scn1a-PV	62	2909	1	3	TSeries-10312019-1006-044	electrical + opto	1	500	68	1	0.0946274
Scn1a-PV	62	2909	1	3	TSeries-10312019-1006-044	electrical + opto	1	500	69	0
Scn1a-PV	62	2909	1	3	TSeries-10312019-1006-044	electrical + opto	1	500	70	1	0.144517
Scn1a-PV	62	2909	1	3	TSeries-10312019-1006-044	electrical + opto	1	500	71	0
Scn1a-PV	62	2909	1	3	TSeries-10312019-1006-044	electrical + opto	1	500	72	0
Scn1a-PV	62	2909	1	3	TSeries-10312019-1006-044	electrical + opto	1	500	73	0
Scn1a-PV	62	2909	1	3	TSeries-10312019-1006-044	electrical + opto	1	500	74	0
Scn1a-PV	62	2909	1	3	TSeries-10312019-1006-044	electrical + opto	1	500	75	0
Scn1a-PV	62	2909	1	3	TSeries-10312019-1006-044	electrical + opto	1	500	76	1	0.14885
Scn1a-PV	62	2909	1	3	TSeries-10312019-1006-044	electrical + opto	1	500	77	0
Scn1a-PV	62	2909	1	3	TSeries-10312019-1006-044	electrical + opto	1	500	78	0
Scn1a-PV	62	2909	1	3	TSeries-10312019-1006-044	electrical + opto	1	500	79	0
Scn1a-PV	62	2909	1	3	TSeries-10312019-1006-044	electrical + opto	1	500	80	0
Scn1a-PV	62	2909	1	3	TSeries-10312019-1006-044	electrical + opto	1	500	81	0
Scn1a-PV	62	2909	1	3	TSeries-10312019-1006-044	electrical + opto	1	500	82	0
Scn1a-PV	62	2909	1	3	TSeries-10312019-1006-044	electrical + opto	1	500	83	0
Scn1a-PV	62	2909	1	3	TSeries-10312019-1006-044	electrical + opto	1	500	84	0
Scn1a-PV	62	2909	1	3	TSeries-10312019-1006-044	electrical + opto	1	500	85	0
Scn1a-PV	62	2909	1	3	TSeries-10312019-1006-044	electrical + opto	1	500	86	0
Scn1a-PV	62	2909	1	3	TSeries-10312019-1006-044	electrical + opto	1	500	87	0
Scn1a-PV	62	2909	1	3	TSeries-10312019-1006-044	electrical + opto	1	500	88	0
Scn1a-PV	62	2909	1	3	TSeries-10312019-1006-044	electrical + opto	1	500	89	0
Scn1a-PV	62	2909	1	3	TSeries-10312019-1006-044	electrical + opto	1	500	90	0
Scn1a-PV	62	2909	1	3	TSeries-10312019-1006-044	electrical + opto	1	500	91	0
Scn1a-PV	62	2909	1	3	TSeries-10312019-1006-044	electrical + opto	1	500	92	0
Scn1a-PV	62	2909	1	3	TSeries-10312019-1006-044	electrical + opto	1	500	93	0
Scn1a-PV	62	2909	1	3	TSeries-10312019-1006-044	electrical + opto	1	500	94	0
Scn1a-PV	62	2909	1	3	TSeries-10312019-1006-044	electrical + opto	1	500	95	0
Scn1a-PV	62	2909	1	3	TSeries-10312019-1006-044	electrical + opto	1	500	96	0
Scn1a-PV	62	2909	1	3	TSeries-10312019-1006-044	electrical + opto	1	500	97	0
Scn1a-PV	62	2909	1	3	TSeries-10312019-1006-044	electrical + opto	1	500	98	0
Scn1a-PV	62	2909	1	3	TSeries-10312019-1006-044	electrical + opto	1	500	99	0
Scn1a-PV	62	2909	1	3	TSeries-10312019-1006-044	electrical + opto	1	500	100	1	0.0965645
Scn1a-PV	62	2909	1	3	TSeries-10312019-1006-044	electrical + opto	1	500	101	0
Scn1a-PV	62	2909	1	3	TSeries-10312019-1006-044	electrical + opto	1	500	102	0
Scn1a-PV	62	2909	1	3	TSeries-10312019-1006-044	electrical + opto	1	500	103	1	0.115359
Scn1a-PV	62	2909	1	3	TSeries-10312019-1006-044	electrical + opto	1	500	104	0
Scn1a-PV	62	2909	1	3	TSeries-10312019-1006-044	electrical + opto	1	500	105	0
Scn1a-PV	62	2909	1	3	TSeries-10312019-1006-044	electrical + opto	1	500	106	0
Scn1a-PV	62	2909	1	3	TSeries-10312019-1006-044	electrical + opto	1	500	107	0
Scn1a-PV	62	2909	1	3	TSeries-10312019-1006-044	electrical + opto	1	500	108	0
Scn1a-PV	62	2909	1	3	TSeries-10312019-1006-044	electrical + opto	1	500	109	0
Scn1a-PV	62	2909	1	3	TSeries-10312019-1006-044	electrical + opto	1	500	110	0
Scn1a-PV	62	2909	1	3	TSeries-10312019-1006-044	electrical + opto	1	500	111	0
Scn1a-PV	62	2909	1	3	TSeries-10312019-1006-044	electrical + opto	1	500	112	0
Scn1a-PV	62	2909	1	3	TSeries-10312019-1006-044	electrical + opto	1	500	113	0
Scn1a-PV	62	2909	1	3	TSeries-10312019-1006-044	electrical + opto	1	500	114	0
Scn1a-PV	62	2909	1	3	TSeries-10312019-1006-044	electrical + opto	1	500	115	0
Scn1a-PV	62	2909	1	3	TSeries-10312019-1006-044	electrical + opto	1	500	116	0
Scn1a-PV	68	3357	1	1	TSeries-03092020-0954-001	electrical	1	500	0	1	0.262209
Scn1a-PV	68	3357	1	1	TSeries-03092020-0954-001	electrical	1	500	1	0
Scn1a-PV	68	3357	1	1	TSeries-03092020-0954-001	electrical	1	500	2	1	1.06442
Scn1a-PV	68	3357	1	1	TSeries-03092020-0954-001	electrical	1	500	3	1	0.17362
Scn1a-PV	68	3357	1	1	TSeries-03092020-0954-001	electrical	1	500	4	1	0.165916
Scn1a-PV	68	3357	1	1	TSeries-03092020-0954-001	electrical	1	500	5	1	0.571052
Scn1a-PV	68	3357	1	1	TSeries-03092020-0954-001	electrical	1	500	6	1	0.161332
Scn1a-PV	68	3357	1	1	TSeries-03092020-0954-001	electrical	1	500	7	1	1.11956
Scn1a-PV	68	3357	1	1	TSeries-03092020-0954-001	electrical	1	500	8	1	1.04292
Scn1a-PV	68	3357	1	1	TSeries-03092020-0954-001	electrical	1	500	9	1	0.737216
Scn1a-PV	68	3357	1	1	TSeries-03092020-0954-001	electrical	1	500	10	1	1.20946
Scn1a-PV	68	3357	1	1	TSeries-03092020-0954-001	electrical	1	500	11	1	0.98274
Scn1a-PV	68	3357	1	1	TSeries-03092020-0954-001	electrical	1	500	12	1	0.842
Scn1a-PV	68	3357	1	1	TSeries-03092020-0954-001	electrical	1	500	13	1	0.301828
Scn1a-PV	68	3357	1	1	TSeries-03092020-0954-001	electrical	1	500	14	1	0.521621
Scn1a-PV	68	3357	1	1	TSeries-03092020-0954-001	electrical	1	500	15	1	0.896204
Scn1a-PV	68	3357	1	1	TSeries-03092020-0954-001	electrical	1	500	16	1	0.883824
Scn1a-PV	68	3357	1	1	TSeries-03092020-0954-001	electrical	1	500	17	1	0.65443
Scn1a-PV	68	3357	1	1	TSeries-03092020-0954-001	electrical	1	500	18	1	0.1102
Scn1a-PV	68	3357	1	1	TSeries-03092020-0954-001	electrical	1	500	19	1	0.317481
Scn1a-PV	68	3357	1	1	TSeries-03092020-0954-001	electrical	1	500	20	1	0.185125
Scn1a-PV	68	3357	1	1	TSeries-03092020-0954-001	electrical	1	500	21	0
Scn1a-PV	68	3357	1	1	TSeries-03092020-0954-001	electrical	1	500	22	1	0.743901
Scn1a-PV	68	3357	1	1	TSeries-03092020-0954-001	electrical	1	500	23	1	0.53438
Scn1a-PV	68	3357	1	1	TSeries-03092020-0954-001	electrical	1	500	24	0
Scn1a-PV	68	3357	1	1	TSeries-03092020-0954-001	electrical	1	500	25	1	0.454255
Scn1a-PV	68	3357	1	1	TSeries-03092020-0954-001	electrical	1	500	26	1	0.116584
Scn1a-PV	68	3357	1	1	TSeries-03092020-0954-001	electrical	1	500	27	1	0.14031
Scn1a-PV	68	3357	1	1	TSeries-03092020-0954-001	electrical	1	500	28	0
Scn1a-PV	68	3357	1	1	TSeries-03092020-0954-001	electrical	1	500	29	1	0.258637
Scn1a-PV	68	3357	1	1	TSeries-03092020-0954-001	electrical	1	500	30	1	0.236076
Scn1a-PV	68	3357	1	1	TSeries-03092020-0954-001	electrical	1	500	31	1	0.31941
Scn1a-PV	68	3357	1	1	TSeries-03092020-0954-001	electrical	1	500	32	1	0.346199
Scn1a-PV	68	3357	1	1	TSeries-03092020-0954-001	electrical	1	500	33	1	0.34276
Scn1a-PV	68	3357	1	1	TSeries-03092020-0954-001	electrical	1	500	34	1	0.537822
Scn1a-PV	68	3357	1	1	TSeries-03092020-0954-001	electrical	1	500	35	1	0.26237
Scn1a-PV	68	3357	1	1	TSeries-03092020-0954-001	electrical	1	500	36	1	0.303765
Scn1a-PV	68	3357	1	1	TSeries-03092020-0954-001	electrical	1	500	37	1	0.30832
Scn1a-PV	68	3357	1	1	TSeries-03092020-0954-001	electrical	1	500	38	1	0.52306
Scn1a-PV	68	3357	1	1	TSeries-03092020-0954-001	electrical	1	500	39	1	0.271291
Scn1a-PV	68	3357	1	1	TSeries-03092020-0954-001	electrical	1	500	40	1	0.309074
Scn1a-PV	68	3357	1	1	TSeries-03092020-0954-001	electrical	1	500	41	1	0.702594
Scn1a-PV	68	3357	1	1	TSeries-03092020-0954-001	electrical	1	500	42	1	0.895959
Scn1a-PV	68	3357	1	1	TSeries-03092020-0954-002	opto alone control	1	500	0	0
Scn1a-PV	68	3357	1	1	TSeries-03092020-0954-002	opto alone control	1	500	1	0
Scn1a-PV	68	3357	1	1	TSeries-03092020-0954-002	opto alone control	1	500	2	0
Scn1a-PV	68	3357	1	1	TSeries-03092020-0954-002	opto alone control	1	500	3	0
Scn1a-PV	68	3357	1	1	TSeries-03092020-0954-002	opto alone control	1	500	4	0
Scn1a-PV	68	3357	1	1	TSeries-03092020-0954-002	opto alone control	1	500	5	0
Scn1a-PV	68	3357	1	1	TSeries-03092020-0954-002	opto alone control	1	500	6	0
Scn1a-PV	68	3357	1	1	TSeries-03092020-0954-002	opto alone control	1	500	7	0
Scn1a-PV	68	3357	1	1	TSeries-03092020-0954-002	opto alone control	1	500	8	0
Scn1a-PV	68	3357	1	1	TSeries-03092020-0954-002	opto alone control	1	500	9	0
Scn1a-PV	68	3357	1	1	TSeries-03092020-0954-002	opto alone control	1	500	10	0
Scn1a-PV	68	3357	1	1	TSeries-03092020-0954-002	opto alone control	1	500	11	0
Scn1a-PV	68	3357	1	1	TSeries-03092020-0954-002	opto alone control	1	500	12	0
Scn1a-PV	68	3357	1	1	TSeries-03092020-0954-002	opto alone control	1	500	13	0
Scn1a-PV	68	3357	1	1	TSeries-03092020-0954-002	opto alone control	1	500	14	0
Scn1a-PV	68	3357	1	1	TSeries-03092020-0954-002	opto alone control	1	500	15	0
Scn1a-PV	68	3357	1	1	TSeries-03092020-0954-002	opto alone control	1	500	16	0
Scn1a-PV	68	3357	1	1	TSeries-03092020-0954-002	opto alone control	1	500	17	0
Scn1a-PV	68	3357	1	1	TSeries-03092020-0954-002	opto alone control	1	500	18	0
Scn1a-PV	68	3357	1	1	TSeries-03092020-0954-002	opto alone control	1	500	19	0
Scn1a-PV	68	3357	1	1	TSeries-03092020-0954-002	opto alone control	1	500	20	0
Scn1a-PV	68	3357	1	1	TSeries-03092020-0954-002	opto alone control	1	500	21	0
Scn1a-PV	68	3357	1	1	TSeries-03092020-0954-002	opto alone control	1	500	22	0
Scn1a-PV	68	3357	1	1	TSeries-03092020-0954-002	opto alone control	1	500	23	0
Scn1a-PV	68	3357	1	1	TSeries-03092020-0954-002	opto alone control	1	500	24	0
Scn1a-PV	68	3357	1	1	TSeries-03092020-0954-002	opto alone control	1	500	25	0
Scn1a-PV	68	3357	1	1	TSeries-03092020-0954-002	opto alone control	1	500	26	0
Scn1a-PV	68	3357	1	1	TSeries-03092020-0954-002	opto alone control	1	500	27	0
Scn1a-PV	68	3357	1	1	TSeries-03092020-0954-002	opto alone control	1	500	28	0
Scn1a-PV	68	3357	1	1	TSeries-03092020-0954-002	opto alone control	1	500	29	0
Scn1a-PV	68	3357	1	1	TSeries-03092020-0954-002	opto alone control	1	500	30	0
Scn1a-PV	68	3357	1	1	TSeries-03092020-0954-002	opto alone control	1	500	31	0
Scn1a-PV	68	3357	1	1	TSeries-03092020-0954-002	opto alone control	1	500	32	0
Scn1a-PV	68	3357	1	1	TSeries-03092020-0954-002	opto alone control	1	500	33	0
Scn1a-PV	68	3357	1	1	TSeries-03092020-0954-002	opto alone control	1	500	34	0
Scn1a-PV	68	3357	1	1	TSeries-03092020-0954-002	opto alone control	1	500	35	0
Scn1a-PV	68	3357	1	1	TSeries-03092020-0954-002	opto alone control	1	500	36	0
Scn1a-PV	68	3357	1	1	TSeries-03092020-0954-002	opto alone control	1	500	37	0
Scn1a-PV	68	3357	1	1	TSeries-03092020-0954-002	opto alone control	1	500	38	0
Scn1a-PV	68	3357	1	1	TSeries-03092020-0954-002	opto alone control	1	500	39	0
Scn1a-PV	68	3357	1	1	TSeries-03092020-0954-002	opto alone control	1	500	40	0
Scn1a-PV	68	3357	1	1	TSeries-03092020-0954-002	opto alone control	1	500	41	0
Scn1a-PV	68	3357	1	1	TSeries-03092020-0954-002	opto alone control	1	500	42	0
Scn1a-PV	68	3357	1	1	TSeries-03092020-0954-006	electrical + opto	1	500	0	0
Scn1a-PV	68	3357	1	1	TSeries-03092020-0954-006	electrical + opto	1	500	1	0
Scn1a-PV	68	3357	1	1	TSeries-03092020-0954-006	electrical + opto	1	500	2	1	1.2801
Scn1a-PV	68	3357	1	1	TSeries-03092020-0954-006	electrical + opto	1	500	3	0
Scn1a-PV	68	3357	1	1	TSeries-03092020-0954-006	electrical + opto	1	500	4	1	0.355303
Scn1a-PV	68	3357	1	1	TSeries-03092020-0954-006	electrical + opto	1	500	5	0
Scn1a-PV	68	3357	1	1	TSeries-03092020-0954-006	electrical + opto	1	500	6	1	0.186565
Scn1a-PV	68	3357	1	1	TSeries-03092020-0954-006	electrical + opto	1	500	7	1	0.743559
Scn1a-PV	68	3357	1	1	TSeries-03092020-0954-006	electrical + opto	1	500	8	0
Scn1a-PV	68	3357	1	1	TSeries-03092020-0954-006	electrical + opto	1	500	9	0
Scn1a-PV	68	3357	1	1	TSeries-03092020-0954-006	electrical + opto	1	500	10	0
Scn1a-PV	68	3357	1	1	TSeries-03092020-0954-006	electrical + opto	1	500	11	1	0.70224
Scn1a-PV	68	3357	1	1	TSeries-03092020-0954-006	electrical + opto	1	500	12	1	0.654389
Scn1a-PV	68	3357	1	1	TSeries-03092020-0954-006	electrical + opto	1	500	13	1	0.190045
Scn1a-PV	68	3357	1	1	TSeries-03092020-0954-006	electrical + opto	1	500	14	1	0.351915
Scn1a-PV	68	3357	1	1	TSeries-03092020-0954-006	electrical + opto	1	500	15	0
Scn1a-PV	68	3357	1	1	TSeries-03092020-0954-006	electrical + opto	1	500	16	0
Scn1a-PV	68	3357	1	1	TSeries-03092020-0954-006	electrical + opto	1	500	17	0
Scn1a-PV	68	3357	1	1	TSeries-03092020-0954-006	electrical + opto	1	500	18	0
Scn1a-PV	68	3357	1	1	TSeries-03092020-0954-006	electrical + opto	1	500	19	0
Scn1a-PV	68	3357	1	1	TSeries-03092020-0954-006	electrical + opto	1	500	20	0
Scn1a-PV	68	3357	1	1	TSeries-03092020-0954-006	electrical + opto	1	500	21	0
Scn1a-PV	68	3357	1	1	TSeries-03092020-0954-006	electrical + opto	1	500	22	0
Scn1a-PV	68	3357	1	1	TSeries-03092020-0954-006	electrical + opto	1	500	23	0
Scn1a-PV	68	3357	1	1	TSeries-03092020-0954-006	electrical + opto	1	500	24	0
Scn1a-PV	68	3357	1	1	TSeries-03092020-0954-006	electrical + opto	1	500	25	0
Scn1a-PV	68	3357	1	1	TSeries-03092020-0954-006	electrical + opto	1	500	26	0
Scn1a-PV	68	3357	1	1	TSeries-03092020-0954-006	electrical + opto	1	500	27	0
Scn1a-PV	68	3357	1	1	TSeries-03092020-0954-006	electrical + opto	1	500	28	0
Scn1a-PV	68	3357	1	1	TSeries-03092020-0954-006	electrical + opto	1	500	29	0
Scn1a-PV	68	3357	1	1	TSeries-03092020-0954-006	electrical + opto	1	500	30	1	0.106663
Scn1a-PV	68	3357	1	1	TSeries-03092020-0954-006	electrical + opto	1	500	31	0
Scn1a-PV	68	3357	1	1	TSeries-03092020-0954-006	electrical + opto	1	500	32	0
Scn1a-PV	68	3357	1	1	TSeries-03092020-0954-006	electrical + opto	1	500	33	0
Scn1a-PV	68	3357	1	1	TSeries-03092020-0954-006	electrical + opto	1	500	34	0
Scn1a-PV	68	3357	1	1	TSeries-03092020-0954-006	electrical + opto	1	500	35	0
Scn1a-PV	68	3357	1	1	TSeries-03092020-0954-006	electrical + opto	1	500	36	0
Scn1a-PV	68	3357	1	1	TSeries-03092020-0954-006	electrical + opto	1	500	37	0
Scn1a-PV	68	3357	1	1	TSeries-03092020-0954-006	electrical + opto	1	500	38	0
Scn1a-PV	68	3357	1	1	TSeries-03092020-0954-006	electrical + opto	1	500	39	0
Scn1a-PV	68	3357	1	1	TSeries-03092020-0954-006	electrical + opto	1	500	40	0
Scn1a-PV	68	3357	1	1	TSeries-03092020-0954-006	electrical + opto	1	500	41	1	0.221588
Scn1a-PV	68	3357	1	1	TSeries-03092020-0954-006	electrical + opto	1	500	42	1	0.370751
Scn1a-PV	68	3357	1	2	TSeries-03092020-0954-012	electrical	1	500	0	1	0.859916
Scn1a-PV	68	3357	1	2	TSeries-03092020-0954-012	electrical	1	500	1	1	1.18754
Scn1a-PV	68	3357	1	2	TSeries-03092020-0954-012	electrical	1	500	2	1	0.551125
Scn1a-PV	68	3357	1	2	TSeries-03092020-0954-012	electrical	1	500	3	1	0.412139
Scn1a-PV	68	3357	1	2	TSeries-03092020-0954-012	electrical	1	500	4	1	0.411728
Scn1a-PV	68	3357	1	2	TSeries-03092020-0954-012	electrical	1	500	5	1	1.34696
Scn1a-PV	68	3357	1	2	TSeries-03092020-0954-012	electrical	1	500	6	1	1.07495
Scn1a-PV	68	3357	1	2	TSeries-03092020-0954-012	electrical	1	500	7	1	1.02799
Scn1a-PV	68	3357	1	2	TSeries-03092020-0954-012	electrical	1	500	8	1	0.345274
Scn1a-PV	68	3357	1	2	TSeries-03092020-0954-012	electrical	1	500	9	1	1.21247
Scn1a-PV	68	3357	1	2	TSeries-03092020-0954-012	electrical	1	500	10	1	0.752828
Scn1a-PV	68	3357	1	2	TSeries-03092020-0954-012	electrical	1	500	11	1	0.533885
Scn1a-PV	68	3357	1	2	TSeries-03092020-0954-012	electrical	1	500	12	1	0.296685
Scn1a-PV	68	3357	1	2	TSeries-03092020-0954-012	electrical	1	500	13	1	0.285029
Scn1a-PV	68	3357	1	2	TSeries-03092020-0954-012	electrical	1	500	14	1	0.353271
Scn1a-PV	68	3357	1	2	TSeries-03092020-0954-012	electrical	1	500	15	1	0.541411
Scn1a-PV	68	3357	1	2	TSeries-03092020-0954-012	electrical	1	500	16	1	0.220509
Scn1a-PV	68	3357	1	2	TSeries-03092020-0954-012	electrical	1	500	17	1	0.598446
Scn1a-PV	68	3357	1	2	TSeries-03092020-0954-012	electrical	1	500	18	1	0.419913
Scn1a-PV	68	3357	1	2	TSeries-03092020-0954-012	electrical	1	500	19	1	0.263157
Scn1a-PV	68	3357	1	2	TSeries-03092020-0954-012	electrical	1	500	20	1	0.697849
Scn1a-PV	68	3357	1	2	TSeries-03092020-0954-012	electrical	1	500	21	1	0.390859
Scn1a-PV	68	3357	1	2	TSeries-03092020-0954-012	electrical	1	500	22	1	0.277027
Scn1a-PV	68	3357	1	2	TSeries-03092020-0954-012	electrical	1	500	23	1	0.864126
Scn1a-PV	68	3357	1	2	TSeries-03092020-0954-012	electrical	1	500	24	1	0.338965
Scn1a-PV	68	3357	1	2	TSeries-03092020-0954-012	electrical	1	500	25	1	0.790289
Scn1a-PV	68	3357	1	2	TSeries-03092020-0954-012	electrical	1	500	26	0
Scn1a-PV	68	3357	1	2	TSeries-03092020-0954-012	electrical	1	500	27	1	0.856035
Scn1a-PV	68	3357	1	2	TSeries-03092020-0954-012	electrical	1	500	28	1	0.376032
Scn1a-PV	68	3357	1	2	TSeries-03092020-0954-012	electrical	1	500	29	1	0.182208
Scn1a-PV	68	3357	1	2	TSeries-03092020-0954-012	electrical	1	500	30	1	0.21068
Scn1a-PV	68	3357	1	2	TSeries-03092020-0954-012	electrical	1	500	31	1	0.161226
Scn1a-PV	68	3357	1	2	TSeries-03092020-0954-012	electrical	1	500	32	1	0.426451
Scn1a-PV	68	3357	1	2	TSeries-03092020-0954-012	electrical	1	500	33	1	0.324343
Scn1a-PV	68	3357	1	2	TSeries-03092020-0954-012	electrical	1	500	34	1	0.441364
Scn1a-PV	68	3357	1	2	TSeries-03092020-0954-012	electrical	1	500	35	0
Scn1a-PV	68	3357	1	2	TSeries-03092020-0954-012	electrical	1	500	36	1	0.226438
Scn1a-PV	68	3357	1	2	TSeries-03092020-0954-012	electrical	1	500	37	1	0.516196
Scn1a-PV	68	3357	1	2	TSeries-03092020-0954-012	electrical	1	500	38	0
Scn1a-PV	68	3357	1	2	TSeries-03092020-0954-012	electrical	1	500	39	1	0.202896
Scn1a-PV	68	3357	1	2	TSeries-03092020-0954-012	electrical	1	500	40	0
Scn1a-PV	68	3357	1	2	TSeries-03092020-0954-012	electrical	1	500	41	1	0.263419
Scn1a-PV	68	3357	1	2	TSeries-03092020-0954-012	electrical	1	500	42	0
Scn1a-PV	68	3357	1	2	TSeries-03092020-0954-012	electrical	1	500	43	0
Scn1a-PV	68	3357	1	2	TSeries-03092020-0954-012	electrical	1	500	44	1	0.343794
Scn1a-PV	68	3357	1	2	TSeries-03092020-0954-012	electrical	1	500	45	0
Scn1a-PV	68	3357	1	2	TSeries-03092020-0954-012	electrical	1	500	46	0
Scn1a-PV	68	3357	1	2	TSeries-03092020-0954-012	electrical	1	500	47	1	0.143583
Scn1a-PV	68	3357	1	2	TSeries-03092020-0954-012	electrical	1	500	48	0
Scn1a-PV	68	3357	1	2	TSeries-03092020-0954-012	electrical	1	500	49	0
Scn1a-PV	68	3357	1	2	TSeries-03092020-0954-012	electrical	1	500	50	1	0.350958
Scn1a-PV	68	3357	1	2	TSeries-03092020-0954-012	electrical	1	500	51	0
Scn1a-PV	68	3357	1	2	TSeries-03092020-0954-012	electrical	1	500	52	1	0.245904
Scn1a-PV	68	3357	1	2	TSeries-03092020-0954-012	electrical	1	500	53	0
Scn1a-PV	68	3357	1	2	TSeries-03092020-0954-012	electrical	1	500	54	1	0.197686
Scn1a-PV	68	3357	1	2	TSeries-03092020-0954-012	electrical	1	500	55	1	0.274987
Scn1a-PV	68	3357	1	2	TSeries-03092020-0954-012	electrical	1	500	56	0
Scn1a-PV	68	3357	1	2	TSeries-03092020-0954-012	electrical	1	500	57	1	0.203264
Scn1a-PV	68	3357	1	2	TSeries-03092020-0954-012	electrical	1	500	58	0
Scn1a-PV	68	3357	1	2	TSeries-03092020-0954-012	electrical	1	500	59	0
Scn1a-PV	68	3357	1	2	TSeries-03092020-0954-012	electrical	1	500	60	0
Scn1a-PV	68	3357	1	2	TSeries-03092020-0954-012	electrical	1	500	61	0
Scn1a-PV	68	3357	1	2	TSeries-03092020-0954-012	electrical	1	500	62	1	0.13126
Scn1a-PV	68	3357	1	2	TSeries-03092020-0954-012	electrical	1	500	63	0
Scn1a-PV	68	3357	1	2	TSeries-03092020-0954-012	electrical	1	500	64	1	0.126923
Scn1a-PV	68	3357	1	2	TSeries-03092020-0954-012	electrical	1	500	65	1	0.332333
Scn1a-PV	68	3357	1	2	TSeries-03092020-0954-012	electrical	1	500	66	1	0.326054
Scn1a-PV	68	3357	1	2	TSeries-03092020-0954-012	electrical	1	500	67	1	0.19318
Scn1a-PV	68	3357	1	2	TSeries-03092020-0954-012	electrical	1	500	68	1	0.259046
Scn1a-PV	68	3357	1	2	TSeries-03092020-0954-012	electrical	1	500	69	1	0.18306
Scn1a-PV	68	3357	1	2	TSeries-03092020-0954-012	electrical	1	500	70	0
Scn1a-PV	68	3357	1	2	TSeries-03092020-0954-012	electrical	1	500	71	0
Scn1a-PV	68	3357	1	2	TSeries-03092020-0954-013	opto alone control	1	500	0	0
Scn1a-PV	68	3357	1	2	TSeries-03092020-0954-013	opto alone control	1	500	1	0
Scn1a-PV	68	3357	1	2	TSeries-03092020-0954-013	opto alone control	1	500	2	0
Scn1a-PV	68	3357	1	2	TSeries-03092020-0954-013	opto alone control	1	500	3	0
Scn1a-PV	68	3357	1	2	TSeries-03092020-0954-013	opto alone control	1	500	4	0
Scn1a-PV	68	3357	1	2	TSeries-03092020-0954-013	opto alone control	1	500	5	0
Scn1a-PV	68	3357	1	2	TSeries-03092020-0954-013	opto alone control	1	500	6	0
Scn1a-PV	68	3357	1	2	TSeries-03092020-0954-013	opto alone control	1	500	7	0
Scn1a-PV	68	3357	1	2	TSeries-03092020-0954-013	opto alone control	1	500	8	0
Scn1a-PV	68	3357	1	2	TSeries-03092020-0954-013	opto alone control	1	500	9	0
Scn1a-PV	68	3357	1	2	TSeries-03092020-0954-013	opto alone control	1	500	10	0
Scn1a-PV	68	3357	1	2	TSeries-03092020-0954-013	opto alone control	1	500	11	0
Scn1a-PV	68	3357	1	2	TSeries-03092020-0954-013	opto alone control	1	500	12	0
Scn1a-PV	68	3357	1	2	TSeries-03092020-0954-013	opto alone control	1	500	13	0
Scn1a-PV	68	3357	1	2	TSeries-03092020-0954-013	opto alone control	1	500	14	0
Scn1a-PV	68	3357	1	2	TSeries-03092020-0954-013	opto alone control	1	500	15	0
Scn1a-PV	68	3357	1	2	TSeries-03092020-0954-013	opto alone control	1	500	16	0
Scn1a-PV	68	3357	1	2	TSeries-03092020-0954-013	opto alone control	1	500	17	0
Scn1a-PV	68	3357	1	2	TSeries-03092020-0954-013	opto alone control	1	500	18	0
Scn1a-PV	68	3357	1	2	TSeries-03092020-0954-013	opto alone control	1	500	19	0
Scn1a-PV	68	3357	1	2	TSeries-03092020-0954-013	opto alone control	1	500	20	0
Scn1a-PV	68	3357	1	2	TSeries-03092020-0954-013	opto alone control	1	500	21	0
Scn1a-PV	68	3357	1	2	TSeries-03092020-0954-013	opto alone control	1	500	22	0
Scn1a-PV	68	3357	1	2	TSeries-03092020-0954-013	opto alone control	1	500	23	0
Scn1a-PV	68	3357	1	2	TSeries-03092020-0954-013	opto alone control	1	500	24	0
Scn1a-PV	68	3357	1	2	TSeries-03092020-0954-013	opto alone control	1	500	25	0
Scn1a-PV	68	3357	1	2	TSeries-03092020-0954-013	opto alone control	1	500	26	0
Scn1a-PV	68	3357	1	2	TSeries-03092020-0954-013	opto alone control	1	500	27	0
Scn1a-PV	68	3357	1	2	TSeries-03092020-0954-013	opto alone control	1	500	28	0
Scn1a-PV	68	3357	1	2	TSeries-03092020-0954-013	opto alone control	1	500	29	0
Scn1a-PV	68	3357	1	2	TSeries-03092020-0954-013	opto alone control	1	500	30	0
Scn1a-PV	68	3357	1	2	TSeries-03092020-0954-013	opto alone control	1	500	31	0
Scn1a-PV	68	3357	1	2	TSeries-03092020-0954-013	opto alone control	1	500	32	0
Scn1a-PV	68	3357	1	2	TSeries-03092020-0954-013	opto alone control	1	500	33	0
Scn1a-PV	68	3357	1	2	TSeries-03092020-0954-013	opto alone control	1	500	34	0
Scn1a-PV	68	3357	1	2	TSeries-03092020-0954-013	opto alone control	1	500	35	0
Scn1a-PV	68	3357	1	2	TSeries-03092020-0954-013	opto alone control	1	500	36	0
Scn1a-PV	68	3357	1	2	TSeries-03092020-0954-013	opto alone control	1	500	37	0
Scn1a-PV	68	3357	1	2	TSeries-03092020-0954-013	opto alone control	1	500	38	0
Scn1a-PV	68	3357	1	2	TSeries-03092020-0954-013	opto alone control	1	500	39	0
Scn1a-PV	68	3357	1	2	TSeries-03092020-0954-013	opto alone control	1	500	40	0
Scn1a-PV	68	3357	1	2	TSeries-03092020-0954-013	opto alone control	1	500	41	0
Scn1a-PV	68	3357	1	2	TSeries-03092020-0954-013	opto alone control	1	500	42	0
Scn1a-PV	68	3357	1	2	TSeries-03092020-0954-013	opto alone control	1	500	43	0
Scn1a-PV	68	3357	1	2	TSeries-03092020-0954-013	opto alone control	1	500	44	0
Scn1a-PV	68	3357	1	2	TSeries-03092020-0954-013	opto alone control	1	500	45	0
Scn1a-PV	68	3357	1	2	TSeries-03092020-0954-013	opto alone control	1	500	46	0
Scn1a-PV	68	3357	1	2	TSeries-03092020-0954-013	opto alone control	1	500	47	0
Scn1a-PV	68	3357	1	2	TSeries-03092020-0954-013	opto alone control	1	500	48	0
Scn1a-PV	68	3357	1	2	TSeries-03092020-0954-013	opto alone control	1	500	49	0
Scn1a-PV	68	3357	1	2	TSeries-03092020-0954-013	opto alone control	1	500	50	0
Scn1a-PV	68	3357	1	2	TSeries-03092020-0954-013	opto alone control	1	500	51	0
Scn1a-PV	68	3357	1	2	TSeries-03092020-0954-013	opto alone control	1	500	52	0
Scn1a-PV	68	3357	1	2	TSeries-03092020-0954-013	opto alone control	1	500	53	0
Scn1a-PV	68	3357	1	2	TSeries-03092020-0954-013	opto alone control	1	500	54	0
Scn1a-PV	68	3357	1	2	TSeries-03092020-0954-013	opto alone control	1	500	55	0
Scn1a-PV	68	3357	1	2	TSeries-03092020-0954-013	opto alone control	1	500	56	0
Scn1a-PV	68	3357	1	2	TSeries-03092020-0954-013	opto alone control	1	500	57	0
Scn1a-PV	68	3357	1	2	TSeries-03092020-0954-013	opto alone control	1	500	58	0
Scn1a-PV	68	3357	1	2	TSeries-03092020-0954-013	opto alone control	1	500	59	0
Scn1a-PV	68	3357	1	2	TSeries-03092020-0954-013	opto alone control	1	500	60	0
Scn1a-PV	68	3357	1	2	TSeries-03092020-0954-013	opto alone control	1	500	61	0
Scn1a-PV	68	3357	1	2	TSeries-03092020-0954-013	opto alone control	1	500	62	0
Scn1a-PV	68	3357	1	2	TSeries-03092020-0954-013	opto alone control	1	500	63	0
Scn1a-PV	68	3357	1	2	TSeries-03092020-0954-013	opto alone control	1	500	64	0
Scn1a-PV	68	3357	1	2	TSeries-03092020-0954-013	opto alone control	1	500	65	0
Scn1a-PV	68	3357	1	2	TSeries-03092020-0954-013	opto alone control	1	500	66	0
Scn1a-PV	68	3357	1	2	TSeries-03092020-0954-013	opto alone control	1	500	67	0
Scn1a-PV	68	3357	1	2	TSeries-03092020-0954-013	opto alone control	1	500	68	0
Scn1a-PV	68	3357	1	2	TSeries-03092020-0954-013	opto alone control	1	500	69	0
Scn1a-PV	68	3357	1	2	TSeries-03092020-0954-013	opto alone control	1	500	70	0
Scn1a-PV	68	3357	1	2	TSeries-03092020-0954-013	opto alone control	1	500	71	0
Scn1a-PV	68	3357	1	2	TSeries-03092020-0954-017	electrical + opto	1	500	0	0
Scn1a-PV	68	3357	1	2	TSeries-03092020-0954-017	electrical + opto	1	500	1	1	0.265091
Scn1a-PV	68	3357	1	2	TSeries-03092020-0954-017	electrical + opto	1	500	2	1	0.162891
Scn1a-PV	68	3357	1	2	TSeries-03092020-0954-017	electrical + opto	1	500	3	1	0.190594
Scn1a-PV	68	3357	1	2	TSeries-03092020-0954-017	electrical + opto	1	500	4	1	0.359048
Scn1a-PV	68	3357	1	2	TSeries-03092020-0954-017	electrical + opto	1	500	5	1	0.471493
Scn1a-PV	68	3357	1	2	TSeries-03092020-0954-017	electrical + opto	1	500	6	1	0.432247
Scn1a-PV	68	3357	1	2	TSeries-03092020-0954-017	electrical + opto	1	500	7	1	0.815553
Scn1a-PV	68	3357	1	2	TSeries-03092020-0954-017	electrical + opto	1	500	8	0
Scn1a-PV	68	3357	1	2	TSeries-03092020-0954-017	electrical + opto	1	500	9	1	1.95728
Scn1a-PV	68	3357	1	2	TSeries-03092020-0954-017	electrical + opto	1	500	10	1	1.02798
Scn1a-PV	68	3357	1	2	TSeries-03092020-0954-017	electrical + opto	1	500	11	1	0.265289
Scn1a-PV	68	3357	1	2	TSeries-03092020-0954-017	electrical + opto	1	500	12	1	0.216514
Scn1a-PV	68	3357	1	2	TSeries-03092020-0954-017	electrical + opto	1	500	13	0
Scn1a-PV	68	3357	1	2	TSeries-03092020-0954-017	electrical + opto	1	500	14	1	0.175565
Scn1a-PV	68	3357	1	2	TSeries-03092020-0954-017	electrical + opto	1	500	15	1	0.472821
Scn1a-PV	68	3357	1	2	TSeries-03092020-0954-017	electrical + opto	1	500	16	1	0.160206
Scn1a-PV	68	3357	1	2	TSeries-03092020-0954-017	electrical + opto	1	500	17	1	0.195641
Scn1a-PV	68	3357	1	2	TSeries-03092020-0954-017	electrical + opto	1	500	18	1	0.538141
Scn1a-PV	68	3357	1	2	TSeries-03092020-0954-017	electrical + opto	1	500	19	1	0.27011
Scn1a-PV	68	3357	1	2	TSeries-03092020-0954-017	electrical + opto	1	500	20	1	0.724114
Scn1a-PV	68	3357	1	2	TSeries-03092020-0954-017	electrical + opto	1	500	21	0
Scn1a-PV	68	3357	1	2	TSeries-03092020-0954-017	electrical + opto	1	500	22	1	0.171876
Scn1a-PV	68	3357	1	2	TSeries-03092020-0954-017	electrical + opto	1	500	23	0
Scn1a-PV	68	3357	1	2	TSeries-03092020-0954-017	electrical + opto	1	500	24	0
Scn1a-PV	68	3357	1	2	TSeries-03092020-0954-017	electrical + opto	1	500	25	1	0.166095
Scn1a-PV	68	3357	1	2	TSeries-03092020-0954-017	electrical + opto	1	500	26	0
Scn1a-PV	68	3357	1	2	TSeries-03092020-0954-017	electrical + opto	1	500	27	1	0.11872
Scn1a-PV	68	3357	1	2	TSeries-03092020-0954-017	electrical + opto	1	500	28	1	0.474647
Scn1a-PV	68	3357	1	2	TSeries-03092020-0954-017	electrical + opto	1	500	29	1	0.149152
Scn1a-PV	68	3357	1	2	TSeries-03092020-0954-017	electrical + opto	1	500	30	1	0.186883
Scn1a-PV	68	3357	1	2	TSeries-03092020-0954-017	electrical + opto	1	500	31	0
Scn1a-PV	68	3357	1	2	TSeries-03092020-0954-017	electrical + opto	1	500	32	1	0.12003
Scn1a-PV	68	3357	1	2	TSeries-03092020-0954-017	electrical + opto	1	500	33	0
Scn1a-PV	68	3357	1	2	TSeries-03092020-0954-017	electrical + opto	1	500	34	1	0.338832
Scn1a-PV	68	3357	1	2	TSeries-03092020-0954-017	electrical + opto	1	500	35	1	0.132596
Scn1a-PV	68	3357	1	2	TSeries-03092020-0954-017	electrical + opto	1	500	36	0
Scn1a-PV	68	3357	1	2	TSeries-03092020-0954-017	electrical + opto	1	500	37	0
Scn1a-PV	68	3357	1	2	TSeries-03092020-0954-017	electrical + opto	1	500	38	0
Scn1a-PV	68	3357	1	2	TSeries-03092020-0954-017	electrical + opto	1	500	39	0
Scn1a-PV	68	3357	1	2	TSeries-03092020-0954-017	electrical + opto	1	500	40	1	0.129546
Scn1a-PV	68	3357	1	2	TSeries-03092020-0954-017	electrical + opto	1	500	41	1	0.171834
Scn1a-PV	68	3357	1	2	TSeries-03092020-0954-017	electrical + opto	1	500	42	0
Scn1a-PV	68	3357	1	2	TSeries-03092020-0954-017	electrical + opto	1	500	43	1	0.114023
Scn1a-PV	68	3357	1	2	TSeries-03092020-0954-017	electrical + opto	1	500	44	0
Scn1a-PV	68	3357	1	2	TSeries-03092020-0954-017	electrical + opto	1	500	45	0
Scn1a-PV	68	3357	1	2	TSeries-03092020-0954-017	electrical + opto	1	500	46	0
Scn1a-PV	68	3357	1	2	TSeries-03092020-0954-017	electrical + opto	1	500	47	0
Scn1a-PV	68	3357	1	2	TSeries-03092020-0954-017	electrical + opto	1	500	48	0
Scn1a-PV	68	3357	1	2	TSeries-03092020-0954-017	electrical + opto	1	500	49	1	0.104933
Scn1a-PV	68	3357	1	2	TSeries-03092020-0954-017	electrical + opto	1	500	50	0
Scn1a-PV	68	3357	1	2	TSeries-03092020-0954-017	electrical + opto	1	500	51	1	0.127016
Scn1a-PV	68	3357	1	2	TSeries-03092020-0954-017	electrical + opto	1	500	52	0
Scn1a-PV	68	3357	1	2	TSeries-03092020-0954-017	electrical + opto	1	500	53	1	0.123513
Scn1a-PV	68	3357	1	2	TSeries-03092020-0954-017	electrical + opto	1	500	54	0
Scn1a-PV	68	3357	1	2	TSeries-03092020-0954-017	electrical + opto	1	500	55	1	0.212358
Scn1a-PV	68	3357	1	2	TSeries-03092020-0954-017	electrical + opto	1	500	56	0
Scn1a-PV	68	3357	1	2	TSeries-03092020-0954-017	electrical + opto	1	500	57	0
Scn1a-PV	68	3357	1	2	TSeries-03092020-0954-017	electrical + opto	1	500	58	0
Scn1a-PV	68	3357	1	2	TSeries-03092020-0954-017	electrical + opto	1	500	59	0
Scn1a-PV	68	3357	1	2	TSeries-03092020-0954-017	electrical + opto	1	500	60	0
Scn1a-PV	68	3357	1	2	TSeries-03092020-0954-017	electrical + opto	1	500	61	0
Scn1a-PV	68	3357	1	2	TSeries-03092020-0954-017	electrical + opto	1	500	62	0
Scn1a-PV	68	3357	1	2	TSeries-03092020-0954-017	electrical + opto	1	500	63	0
Scn1a-PV	68	3357	1	2	TSeries-03092020-0954-017	electrical + opto	1	500	64	0
Scn1a-PV	68	3357	1	2	TSeries-03092020-0954-017	electrical + opto	1	500	65	0
Scn1a-PV	68	3357	1	2	TSeries-03092020-0954-017	electrical + opto	1	500	66	1	0.18029
Scn1a-PV	68	3357	1	2	TSeries-03092020-0954-017	electrical + opto	1	500	67	1	0.210792
Scn1a-PV	68	3357	1	2	TSeries-03092020-0954-017	electrical + opto	1	500	68	0
Scn1a-PV	68	3357	1	2	TSeries-03092020-0954-017	electrical + opto	1	500	69	1	0.11119
Scn1a-PV	68	3357	1	2	TSeries-03092020-0954-017	electrical + opto	1	500	70	0
Scn1a-PV	68	3357	1	2	TSeries-03092020-0954-017	electrical + opto	1	500	71	0
Scn1a-PV	68	3357	1	3	TSeries-03092020-0954-023	electrical	1	500	0	1	1.32795
Scn1a-PV	68	3357	1	3	TSeries-03092020-0954-023	electrical	1	500	1	1	0.856781
Scn1a-PV	68	3357	1	3	TSeries-03092020-0954-023	electrical	1	500	2	1	0.684242
Scn1a-PV	68	3357	1	3	TSeries-03092020-0954-023	electrical	1	500	3	1	0.298021
Scn1a-PV	68	3357	1	3	TSeries-03092020-0954-023	electrical	1	500	4	1	0.602956
Scn1a-PV	68	3357	1	3	TSeries-03092020-0954-023	electrical	1	500	5	1	0.408268
Scn1a-PV	68	3357	1	3	TSeries-03092020-0954-023	electrical	1	500	6	1	0.478993
Scn1a-PV	68	3357	1	3	TSeries-03092020-0954-023	electrical	1	500	7	1	0.867352
Scn1a-PV	68	3357	1	3	TSeries-03092020-0954-023	electrical	1	500	8	1	0.790626
Scn1a-PV	68	3357	1	3	TSeries-03092020-0954-023	electrical	1	500	9	1	0.337317
Scn1a-PV	68	3357	1	3	TSeries-03092020-0954-023	electrical	1	500	10	1	0.613398
Scn1a-PV	68	3357	1	3	TSeries-03092020-0954-023	electrical	1	500	11	1	0.94342
Scn1a-PV	68	3357	1	3	TSeries-03092020-0954-023	electrical	1	500	12	1	0.416494
Scn1a-PV	68	3357	1	3	TSeries-03092020-0954-023	electrical	1	500	13	1	1.3757
Scn1a-PV	68	3357	1	3	TSeries-03092020-0954-023	electrical	1	500	14	1	1.05225
Scn1a-PV	68	3357	1	3	TSeries-03092020-0954-023	electrical	1	500	15	0
Scn1a-PV	68	3357	1	3	TSeries-03092020-0954-023	electrical	1	500	16	0
Scn1a-PV	68	3357	1	3	TSeries-03092020-0954-023	electrical	1	500	17	0
Scn1a-PV	68	3357	1	3	TSeries-03092020-0954-023	electrical	1	500	18	0
Scn1a-PV	68	3357	1	3	TSeries-03092020-0954-023	electrical	1	500	19	1	0.378537
Scn1a-PV	68	3357	1	3	TSeries-03092020-0954-023	electrical	1	500	20	1	0.381546
Scn1a-PV	68	3357	1	3	TSeries-03092020-0954-023	electrical	1	500	21	1	0.416198
Scn1a-PV	68	3357	1	3	TSeries-03092020-0954-023	electrical	1	500	22	1	0.639596
Scn1a-PV	68	3357	1	3	TSeries-03092020-0954-023	electrical	1	500	23	1	0.634437
Scn1a-PV	68	3357	1	3	TSeries-03092020-0954-023	electrical	1	500	24	1	0.209911
Scn1a-PV	68	3357	1	3	TSeries-03092020-0954-023	electrical	1	500	25	1	0.600497
Scn1a-PV	68	3357	1	3	TSeries-03092020-0954-023	electrical	1	500	26	1	1.12494
Scn1a-PV	68	3357	1	3	TSeries-03092020-0954-023	electrical	1	500	27	1	0.368928
Scn1a-PV	68	3357	1	3	TSeries-03092020-0954-023	electrical	1	500	28	1	0.221114
Scn1a-PV	68	3357	1	3	TSeries-03092020-0954-023	electrical	1	500	29	1	0.539089
Scn1a-PV	68	3357	1	3	TSeries-03092020-0954-023	electrical	1	500	30	1	0.310433
Scn1a-PV	68	3357	1	3	TSeries-03092020-0954-023	electrical	1	500	31	0
Scn1a-PV	68	3357	1	3	TSeries-03092020-0954-023	electrical	1	500	32	1	0.143599
Scn1a-PV	68	3357	1	3	TSeries-03092020-0954-023	electrical	1	500	33	1	0.125529
Scn1a-PV	68	3357	1	3	TSeries-03092020-0954-023	electrical	1	500	34	1	0.272026
Scn1a-PV	68	3357	1	3	TSeries-03092020-0954-023	electrical	1	500	35	1	0.235377
Scn1a-PV	68	3357	1	3	TSeries-03092020-0954-023	electrical	1	500	36	1	0.443846
Scn1a-PV	68	3357	1	3	TSeries-03092020-0954-023	electrical	1	500	37	0
Scn1a-PV	68	3357	1	3	TSeries-03092020-0954-023	electrical	1	500	38	1	0.19695
Scn1a-PV	68	3357	1	3	TSeries-03092020-0954-023	electrical	1	500	39	1	0.22974
Scn1a-PV	68	3357	1	3	TSeries-03092020-0954-023	electrical	1	500	40	1	0.239571
Scn1a-PV	68	3357	1	3	TSeries-03092020-0954-023	electrical	1	500	41	1	0.242612
Scn1a-PV	68	3357	1	3	TSeries-03092020-0954-023	electrical	1	500	42	1	0.171644
Scn1a-PV	68	3357	1	3	TSeries-03092020-0954-023	electrical	1	500	43	1	0.226318
Scn1a-PV	68	3357	1	3	TSeries-03092020-0954-023	electrical	1	500	44	1	0.276397
Scn1a-PV	68	3357	1	3	TSeries-03092020-0954-023	electrical	1	500	45	1	0.16551
Scn1a-PV	68	3357	1	3	TSeries-03092020-0954-023	electrical	1	500	46	0
Scn1a-PV	68	3357	1	3	TSeries-03092020-0954-023	electrical	1	500	47	0
Scn1a-PV	68	3357	1	3	TSeries-03092020-0954-023	electrical	1	500	48	0
Scn1a-PV	68	3357	1	3	TSeries-03092020-0954-023	electrical	1	500	49	0
Scn1a-PV	68	3357	1	3	TSeries-03092020-0954-023	electrical	1	500	50	1	0.159472
Scn1a-PV	68	3357	1	3	TSeries-03092020-0954-023	electrical	1	500	51	0
Scn1a-PV	68	3357	1	3	TSeries-03092020-0954-023	electrical	1	500	52	1	0.349374
Scn1a-PV	68	3357	1	3	TSeries-03092020-0954-023	electrical	1	500	53	1	0.235326
Scn1a-PV	68	3357	1	3	TSeries-03092020-0954-023	electrical	1	500	54	0
Scn1a-PV	68	3357	1	3	TSeries-03092020-0954-023	electrical	1	500	55	0
Scn1a-PV	68	3357	1	3	TSeries-03092020-0954-023	electrical	1	500	56	0
Scn1a-PV	68	3357	1	3	TSeries-03092020-0954-023	electrical	1	500	57	0
Scn1a-PV	68	3357	1	3	TSeries-03092020-0954-023	electrical	1	500	58	0
Scn1a-PV	68	3357	1	3	TSeries-03092020-0954-023	electrical	1	500	59	0
Scn1a-PV	68	3357	1	3	TSeries-03092020-0954-023	electrical	1	500	60	1	0.147975
Scn1a-PV	68	3357	1	3	TSeries-03092020-0954-023	electrical	1	500	61	1	0.293256
Scn1a-PV	68	3357	1	3	TSeries-03092020-0954-023	electrical	1	500	62	0
Scn1a-PV	68	3357	1	3	TSeries-03092020-0954-023	electrical	1	500	63	0
Scn1a-PV	68	3357	1	3	TSeries-03092020-0954-023	electrical	1	500	64	1	0.123188
Scn1a-PV	68	3357	1	3	TSeries-03092020-0954-023	electrical	1	500	65	1	0.26899
Scn1a-PV	68	3357	1	3	TSeries-03092020-0954-023	electrical	1	500	66	1	0.412938
Scn1a-PV	68	3357	1	3	TSeries-03092020-0954-023	electrical	1	500	67	1	0.186992
Scn1a-PV	68	3357	1	3	TSeries-03092020-0954-023	electrical	1	500	68	0
Scn1a-PV	68	3357	1	3	TSeries-03092020-0954-023	electrical	1	500	69	1	0.422489
Scn1a-PV	68	3357	1	3	TSeries-03092020-0954-023	electrical	1	500	70	1	0.196704
Scn1a-PV	68	3357	1	3	TSeries-03092020-0954-023	electrical	1	500	71	1	0.230305
Scn1a-PV	68	3357	1	3	TSeries-03092020-0954-024	opto alone control	1	500	0	0
Scn1a-PV	68	3357	1	3	TSeries-03092020-0954-024	opto alone control	1	500	1	0
Scn1a-PV	68	3357	1	3	TSeries-03092020-0954-024	opto alone control	1	500	2	0
Scn1a-PV	68	3357	1	3	TSeries-03092020-0954-024	opto alone control	1	500	3	0
Scn1a-PV	68	3357	1	3	TSeries-03092020-0954-024	opto alone control	1	500	4	0
Scn1a-PV	68	3357	1	3	TSeries-03092020-0954-024	opto alone control	1	500	5	0
Scn1a-PV	68	3357	1	3	TSeries-03092020-0954-024	opto alone control	1	500	6	0
Scn1a-PV	68	3357	1	3	TSeries-03092020-0954-024	opto alone control	1	500	7	0
Scn1a-PV	68	3357	1	3	TSeries-03092020-0954-024	opto alone control	1	500	8	0
Scn1a-PV	68	3357	1	3	TSeries-03092020-0954-024	opto alone control	1	500	9	0
Scn1a-PV	68	3357	1	3	TSeries-03092020-0954-024	opto alone control	1	500	10	0
Scn1a-PV	68	3357	1	3	TSeries-03092020-0954-024	opto alone control	1	500	11	0
Scn1a-PV	68	3357	1	3	TSeries-03092020-0954-024	opto alone control	1	500	12	0
Scn1a-PV	68	3357	1	3	TSeries-03092020-0954-024	opto alone control	1	500	13	0
Scn1a-PV	68	3357	1	3	TSeries-03092020-0954-024	opto alone control	1	500	14	0
Scn1a-PV	68	3357	1	3	TSeries-03092020-0954-024	opto alone control	1	500	15	0
Scn1a-PV	68	3357	1	3	TSeries-03092020-0954-024	opto alone control	1	500	16	0
Scn1a-PV	68	3357	1	3	TSeries-03092020-0954-024	opto alone control	1	500	17	0
Scn1a-PV	68	3357	1	3	TSeries-03092020-0954-024	opto alone control	1	500	18	0
Scn1a-PV	68	3357	1	3	TSeries-03092020-0954-024	opto alone control	1	500	19	0
Scn1a-PV	68	3357	1	3	TSeries-03092020-0954-024	opto alone control	1	500	20	0
Scn1a-PV	68	3357	1	3	TSeries-03092020-0954-024	opto alone control	1	500	21	0
Scn1a-PV	68	3357	1	3	TSeries-03092020-0954-024	opto alone control	1	500	22	0
Scn1a-PV	68	3357	1	3	TSeries-03092020-0954-024	opto alone control	1	500	23	0
Scn1a-PV	68	3357	1	3	TSeries-03092020-0954-024	opto alone control	1	500	24	0
Scn1a-PV	68	3357	1	3	TSeries-03092020-0954-024	opto alone control	1	500	25	0
Scn1a-PV	68	3357	1	3	TSeries-03092020-0954-024	opto alone control	1	500	26	0
Scn1a-PV	68	3357	1	3	TSeries-03092020-0954-024	opto alone control	1	500	27	0
Scn1a-PV	68	3357	1	3	TSeries-03092020-0954-024	opto alone control	1	500	28	0
Scn1a-PV	68	3357	1	3	TSeries-03092020-0954-024	opto alone control	1	500	29	0
Scn1a-PV	68	3357	1	3	TSeries-03092020-0954-024	opto alone control	1	500	30	0
Scn1a-PV	68	3357	1	3	TSeries-03092020-0954-024	opto alone control	1	500	31	0
Scn1a-PV	68	3357	1	3	TSeries-03092020-0954-024	opto alone control	1	500	32	0
Scn1a-PV	68	3357	1	3	TSeries-03092020-0954-024	opto alone control	1	500	33	0
Scn1a-PV	68	3357	1	3	TSeries-03092020-0954-024	opto alone control	1	500	34	0
Scn1a-PV	68	3357	1	3	TSeries-03092020-0954-024	opto alone control	1	500	35	0
Scn1a-PV	68	3357	1	3	TSeries-03092020-0954-024	opto alone control	1	500	36	0
Scn1a-PV	68	3357	1	3	TSeries-03092020-0954-024	opto alone control	1	500	37	0
Scn1a-PV	68	3357	1	3	TSeries-03092020-0954-024	opto alone control	1	500	38	0
Scn1a-PV	68	3357	1	3	TSeries-03092020-0954-024	opto alone control	1	500	39	0
Scn1a-PV	68	3357	1	3	TSeries-03092020-0954-024	opto alone control	1	500	40	0
Scn1a-PV	68	3357	1	3	TSeries-03092020-0954-024	opto alone control	1	500	41	0
Scn1a-PV	68	3357	1	3	TSeries-03092020-0954-024	opto alone control	1	500	42	0
Scn1a-PV	68	3357	1	3	TSeries-03092020-0954-024	opto alone control	1	500	43	0
Scn1a-PV	68	3357	1	3	TSeries-03092020-0954-024	opto alone control	1	500	44	0
Scn1a-PV	68	3357	1	3	TSeries-03092020-0954-024	opto alone control	1	500	45	0
Scn1a-PV	68	3357	1	3	TSeries-03092020-0954-024	opto alone control	1	500	46	0
Scn1a-PV	68	3357	1	3	TSeries-03092020-0954-024	opto alone control	1	500	47	0
Scn1a-PV	68	3357	1	3	TSeries-03092020-0954-024	opto alone control	1	500	48	0
Scn1a-PV	68	3357	1	3	TSeries-03092020-0954-024	opto alone control	1	500	49	0
Scn1a-PV	68	3357	1	3	TSeries-03092020-0954-024	opto alone control	1	500	50	0
Scn1a-PV	68	3357	1	3	TSeries-03092020-0954-024	opto alone control	1	500	51	0
Scn1a-PV	68	3357	1	3	TSeries-03092020-0954-024	opto alone control	1	500	52	0
Scn1a-PV	68	3357	1	3	TSeries-03092020-0954-024	opto alone control	1	500	53	0
Scn1a-PV	68	3357	1	3	TSeries-03092020-0954-024	opto alone control	1	500	54	0
Scn1a-PV	68	3357	1	3	TSeries-03092020-0954-024	opto alone control	1	500	55	0
Scn1a-PV	68	3357	1	3	TSeries-03092020-0954-024	opto alone control	1	500	56	0
Scn1a-PV	68	3357	1	3	TSeries-03092020-0954-024	opto alone control	1	500	57	0
Scn1a-PV	68	3357	1	3	TSeries-03092020-0954-024	opto alone control	1	500	58	0
Scn1a-PV	68	3357	1	3	TSeries-03092020-0954-024	opto alone control	1	500	59	0
Scn1a-PV	68	3357	1	3	TSeries-03092020-0954-024	opto alone control	1	500	60	0
Scn1a-PV	68	3357	1	3	TSeries-03092020-0954-024	opto alone control	1	500	61	0
Scn1a-PV	68	3357	1	3	TSeries-03092020-0954-024	opto alone control	1	500	62	0
Scn1a-PV	68	3357	1	3	TSeries-03092020-0954-024	opto alone control	1	500	63	0
Scn1a-PV	68	3357	1	3	TSeries-03092020-0954-024	opto alone control	1	500	64	0
Scn1a-PV	68	3357	1	3	TSeries-03092020-0954-024	opto alone control	1	500	65	0
Scn1a-PV	68	3357	1	3	TSeries-03092020-0954-024	opto alone control	1	500	66	0
Scn1a-PV	68	3357	1	3	TSeries-03092020-0954-024	opto alone control	1	500	67	0
Scn1a-PV	68	3357	1	3	TSeries-03092020-0954-024	opto alone control	1	500	68	0
Scn1a-PV	68	3357	1	3	TSeries-03092020-0954-024	opto alone control	1	500	69	0
Scn1a-PV	68	3357	1	3	TSeries-03092020-0954-024	opto alone control	1	500	70	0
Scn1a-PV	68	3357	1	3	TSeries-03092020-0954-024	opto alone control	1	500	71	0
Scn1a-PV	68	3357	1	3	TSeries-03092020-0954-028	electrical + opto	1	500	0	1	1.05504
Scn1a-PV	68	3357	1	3	TSeries-03092020-0954-028	electrical + opto	1	500	1	1	0.223138
Scn1a-PV	68	3357	1	3	TSeries-03092020-0954-028	electrical + opto	1	500	2	0
Scn1a-PV	68	3357	1	3	TSeries-03092020-0954-028	electrical + opto	1	500	3	1	0.203366
Scn1a-PV	68	3357	1	3	TSeries-03092020-0954-028	electrical + opto	1	500	4	1	0.430441
Scn1a-PV	68	3357	1	3	TSeries-03092020-0954-028	electrical + opto	1	500	5	1	0.27324
Scn1a-PV	68	3357	1	3	TSeries-03092020-0954-028	electrical + opto	1	500	6	1	0.471862
Scn1a-PV	68	3357	1	3	TSeries-03092020-0954-028	electrical + opto	1	500	7	1	0.359854
Scn1a-PV	68	3357	1	3	TSeries-03092020-0954-028	electrical + opto	1	500	8	1	0.267337
Scn1a-PV	68	3357	1	3	TSeries-03092020-0954-028	electrical + opto	1	500	9	1	0.19048
Scn1a-PV	68	3357	1	3	TSeries-03092020-0954-028	electrical + opto	1	500	10	0
Scn1a-PV	68	3357	1	3	TSeries-03092020-0954-028	electrical + opto	1	500	11	1	1.22722
Scn1a-PV	68	3357	1	3	TSeries-03092020-0954-028	electrical + opto	1	500	12	1	0.423422
Scn1a-PV	68	3357	1	3	TSeries-03092020-0954-028	electrical + opto	1	500	13	1	0.699805
Scn1a-PV	68	3357	1	3	TSeries-03092020-0954-028	electrical + opto	1	500	14	1	0.362226
Scn1a-PV	68	3357	1	3	TSeries-03092020-0954-028	electrical + opto	1	500	15	0
Scn1a-PV	68	3357	1	3	TSeries-03092020-0954-028	electrical + opto	1	500	16	0
Scn1a-PV	68	3357	1	3	TSeries-03092020-0954-028	electrical + opto	1	500	17	0
Scn1a-PV	68	3357	1	3	TSeries-03092020-0954-028	electrical + opto	1	500	18	0
Scn1a-PV	68	3357	1	3	TSeries-03092020-0954-028	electrical + opto	1	500	19	0
Scn1a-PV	68	3357	1	3	TSeries-03092020-0954-028	electrical + opto	1	500	20	1	0.149327
Scn1a-PV	68	3357	1	3	TSeries-03092020-0954-028	electrical + opto	1	500	21	1	0.173489
Scn1a-PV	68	3357	1	3	TSeries-03092020-0954-028	electrical + opto	1	500	22	1	0.569035
Scn1a-PV	68	3357	1	3	TSeries-03092020-0954-028	electrical + opto	1	500	23	1	0.326604
Scn1a-PV	68	3357	1	3	TSeries-03092020-0954-028	electrical + opto	1	500	24	1	0.225873
Scn1a-PV	68	3357	1	3	TSeries-03092020-0954-028	electrical + opto	1	500	25	1	0.233534
Scn1a-PV	68	3357	1	3	TSeries-03092020-0954-028	electrical + opto	1	500	26	1	0.250036
Scn1a-PV	68	3357	1	3	TSeries-03092020-0954-028	electrical + opto	1	500	27	1	0.259329
Scn1a-PV	68	3357	1	3	TSeries-03092020-0954-028	electrical + opto	1	500	28	1	0.20893
Scn1a-PV	68	3357	1	3	TSeries-03092020-0954-028	electrical + opto	1	500	29	1	0.488364
Scn1a-PV	68	3357	1	3	TSeries-03092020-0954-028	electrical + opto	1	500	30	0
Scn1a-PV	68	3357	1	3	TSeries-03092020-0954-028	electrical + opto	1	500	31	0
Scn1a-PV	68	3357	1	3	TSeries-03092020-0954-028	electrical + opto	1	500	32	1	0.170124
Scn1a-PV	68	3357	1	3	TSeries-03092020-0954-028	electrical + opto	1	500	33	0
Scn1a-PV	68	3357	1	3	TSeries-03092020-0954-028	electrical + opto	1	500	34	1	0.318065
Scn1a-PV	68	3357	1	3	TSeries-03092020-0954-028	electrical + opto	1	500	35	1	0.173081
Scn1a-PV	68	3357	1	3	TSeries-03092020-0954-028	electrical + opto	1	500	36	1	0.142137
Scn1a-PV	68	3357	1	3	TSeries-03092020-0954-028	electrical + opto	1	500	37	0
Scn1a-PV	68	3357	1	3	TSeries-03092020-0954-028	electrical + opto	1	500	38	0
Scn1a-PV	68	3357	1	3	TSeries-03092020-0954-028	electrical + opto	1	500	39	0
Scn1a-PV	68	3357	1	3	TSeries-03092020-0954-028	electrical + opto	1	500	40	0
Scn1a-PV	68	3357	1	3	TSeries-03092020-0954-028	electrical + opto	1	500	41	0
Scn1a-PV	68	3357	1	3	TSeries-03092020-0954-028	electrical + opto	1	500	42	0
Scn1a-PV	68	3357	1	3	TSeries-03092020-0954-028	electrical + opto	1	500	43	0
Scn1a-PV	68	3357	1	3	TSeries-03092020-0954-028	electrical + opto	1	500	44	1	0.257017
Scn1a-PV	68	3357	1	3	TSeries-03092020-0954-028	electrical + opto	1	500	45	0
Scn1a-PV	68	3357	1	3	TSeries-03092020-0954-028	electrical + opto	1	500	46	0
Scn1a-PV	68	3357	1	3	TSeries-03092020-0954-028	electrical + opto	1	500	47	0
Scn1a-PV	68	3357	1	3	TSeries-03092020-0954-028	electrical + opto	1	500	48	0
Scn1a-PV	68	3357	1	3	TSeries-03092020-0954-028	electrical + opto	1	500	49	0
Scn1a-PV	68	3357	1	3	TSeries-03092020-0954-028	electrical + opto	1	500	50	0
Scn1a-PV	68	3357	1	3	TSeries-03092020-0954-028	electrical + opto	1	500	51	0
Scn1a-PV	68	3357	1	3	TSeries-03092020-0954-028	electrical + opto	1	500	52	1	0.50311
Scn1a-PV	68	3357	1	3	TSeries-03092020-0954-028	electrical + opto	1	500	53	0
Scn1a-PV	68	3357	1	3	TSeries-03092020-0954-028	electrical + opto	1	500	54	0
Scn1a-PV	68	3357	1	3	TSeries-03092020-0954-028	electrical + opto	1	500	55	0
Scn1a-PV	68	3357	1	3	TSeries-03092020-0954-028	electrical + opto	1	500	56	0
Scn1a-PV	68	3357	1	3	TSeries-03092020-0954-028	electrical + opto	1	500	57	0
Scn1a-PV	68	3357	1	3	TSeries-03092020-0954-028	electrical + opto	1	500	58	0
Scn1a-PV	68	3357	1	3	TSeries-03092020-0954-028	electrical + opto	1	500	59	0
Scn1a-PV	68	3357	1	3	TSeries-03092020-0954-028	electrical + opto	1	500	60	0
Scn1a-PV	68	3357	1	3	TSeries-03092020-0954-028	electrical + opto	1	500	61	0
Scn1a-PV	68	3357	1	3	TSeries-03092020-0954-028	electrical + opto	1	500	62	0
Scn1a-PV	68	3357	1	3	TSeries-03092020-0954-028	electrical + opto	1	500	63	0
Scn1a-PV	68	3357	1	3	TSeries-03092020-0954-028	electrical + opto	1	500	64	0
Scn1a-PV	68	3357	1	3	TSeries-03092020-0954-028	electrical + opto	1	500	65	1	0.195988
Scn1a-PV	68	3357	1	3	TSeries-03092020-0954-028	electrical + opto	1	500	66	1	0.339772
Scn1a-PV	68	3357	1	3	TSeries-03092020-0954-028	electrical + opto	1	500	67	0
Scn1a-PV	68	3357	1	3	TSeries-03092020-0954-028	electrical + opto	1	500	68	0
Scn1a-PV	68	3357	1	3	TSeries-03092020-0954-028	electrical + opto	1	500	69	0
Scn1a-PV	68	3357	1	3	TSeries-03092020-0954-028	electrical + opto	1	500	70	0
Scn1a-PV	68	3357	1	3	TSeries-03092020-0954-028	electrical + opto	1	500	71	0
Scn1a-PV	68	3378	1	1	TSeries-03102020-1005-001	electrical	1	500	0	0
Scn1a-PV	68	3378	1	1	TSeries-03102020-1005-001	electrical	1	500	1	1	0.192824
Scn1a-PV	68	3378	1	1	TSeries-03102020-1005-001	electrical	1	500	2	0
Scn1a-PV	68	3378	1	1	TSeries-03102020-1005-001	electrical	1	500	3	0
Scn1a-PV	68	3378	1	1	TSeries-03102020-1005-001	electrical	1	500	4	0
Scn1a-PV	68	3378	1	1	TSeries-03102020-1005-001	electrical	1	500	5	0
Scn1a-PV	68	3378	1	1	TSeries-03102020-1005-001	electrical	1	500	6	0
Scn1a-PV	68	3378	1	1	TSeries-03102020-1005-001	electrical	1	500	7	0
Scn1a-PV	68	3378	1	1	TSeries-03102020-1005-001	electrical	1	500	8	0
Scn1a-PV	68	3378	1	1	TSeries-03102020-1005-001	electrical	1	500	9	0
Scn1a-PV	68	3378	1	1	TSeries-03102020-1005-001	electrical	1	500	10	0
Scn1a-PV	68	3378	1	1	TSeries-03102020-1005-001	electrical	1	500	11	0
Scn1a-PV	68	3378	1	1	TSeries-03102020-1005-001	electrical	1	500	12	0
Scn1a-PV	68	3378	1	1	TSeries-03102020-1005-001	electrical	1	500	13	0
Scn1a-PV	68	3378	1	1	TSeries-03102020-1005-001	electrical	1	500	14	0
Scn1a-PV	68	3378	1	1	TSeries-03102020-1005-001	electrical	1	500	15	0
Scn1a-PV	68	3378	1	1	TSeries-03102020-1005-001	electrical	1	500	16	0
Scn1a-PV	68	3378	1	1	TSeries-03102020-1005-001	electrical	1	500	17	0
Scn1a-PV	68	3378	1	1	TSeries-03102020-1005-001	electrical	1	500	18	0
Scn1a-PV	68	3378	1	1	TSeries-03102020-1005-001	electrical	1	500	19	1	0.221242
Scn1a-PV	68	3378	1	1	TSeries-03102020-1005-001	electrical	1	500	20	0
Scn1a-PV	68	3378	1	1	TSeries-03102020-1005-001	electrical	1	500	21	0
Scn1a-PV	68	3378	1	1	TSeries-03102020-1005-001	electrical	1	500	22	0
Scn1a-PV	68	3378	1	1	TSeries-03102020-1005-001	electrical	1	500	23	0
Scn1a-PV	68	3378	1	1	TSeries-03102020-1005-001	electrical	1	500	24	0
Scn1a-PV	68	3378	1	1	TSeries-03102020-1005-001	electrical	1	500	25	0
Scn1a-PV	68	3378	1	1	TSeries-03102020-1005-001	electrical	1	500	26	1	0.332136
Scn1a-PV	68	3378	1	1	TSeries-03102020-1005-001	electrical	1	500	27	1	0.2008
Scn1a-PV	68	3378	1	1	TSeries-03102020-1005-001	electrical	1	500	28	0
Scn1a-PV	68	3378	1	1	TSeries-03102020-1005-001	electrical	1	500	29	0
Scn1a-PV	68	3378	1	1	TSeries-03102020-1005-001	electrical	1	500	30	0
Scn1a-PV	68	3378	1	1	TSeries-03102020-1005-001	electrical	1	500	31	0
Scn1a-PV	68	3378	1	1	TSeries-03102020-1005-001	electrical	1	500	32	0
Scn1a-PV	68	3378	1	1	TSeries-03102020-1005-001	electrical	1	500	33	0
Scn1a-PV	68	3378	1	1	TSeries-03102020-1005-001	electrical	1	500	34	0
Scn1a-PV	68	3378	1	1	TSeries-03102020-1005-001	electrical	1	500	35	0
Scn1a-PV	68	3378	1	1	TSeries-03102020-1005-001	electrical	1	500	36	0
Scn1a-PV	68	3378	1	1	TSeries-03102020-1005-001	electrical	1	500	37	0
Scn1a-PV	68	3378	1	1	TSeries-03102020-1005-001	electrical	1	500	38	0
Scn1a-PV	68	3378	1	1	TSeries-03102020-1005-001	electrical	1	500	39	0
Scn1a-PV	68	3378	1	1	TSeries-03102020-1005-001	electrical	1	500	40	0
Scn1a-PV	68	3378	1	1	TSeries-03102020-1005-001	electrical	1	500	41	0
Scn1a-PV	68	3378	1	1	TSeries-03102020-1005-001	electrical	1	500	42	1	1.01004
Scn1a-PV	68	3378	1	1	TSeries-03102020-1005-002	opto alone control	1	500	0	0
Scn1a-PV	68	3378	1	1	TSeries-03102020-1005-002	opto alone control	1	500	1	0
Scn1a-PV	68	3378	1	1	TSeries-03102020-1005-002	opto alone control	1	500	2	0
Scn1a-PV	68	3378	1	1	TSeries-03102020-1005-002	opto alone control	1	500	3	0
Scn1a-PV	68	3378	1	1	TSeries-03102020-1005-002	opto alone control	1	500	4	0
Scn1a-PV	68	3378	1	1	TSeries-03102020-1005-002	opto alone control	1	500	5	0
Scn1a-PV	68	3378	1	1	TSeries-03102020-1005-002	opto alone control	1	500	6	0
Scn1a-PV	68	3378	1	1	TSeries-03102020-1005-002	opto alone control	1	500	7	0
Scn1a-PV	68	3378	1	1	TSeries-03102020-1005-002	opto alone control	1	500	8	0
Scn1a-PV	68	3378	1	1	TSeries-03102020-1005-002	opto alone control	1	500	9	0
Scn1a-PV	68	3378	1	1	TSeries-03102020-1005-002	opto alone control	1	500	10	0
Scn1a-PV	68	3378	1	1	TSeries-03102020-1005-002	opto alone control	1	500	11	0
Scn1a-PV	68	3378	1	1	TSeries-03102020-1005-002	opto alone control	1	500	12	0
Scn1a-PV	68	3378	1	1	TSeries-03102020-1005-002	opto alone control	1	500	13	0
Scn1a-PV	68	3378	1	1	TSeries-03102020-1005-002	opto alone control	1	500	14	0
Scn1a-PV	68	3378	1	1	TSeries-03102020-1005-002	opto alone control	1	500	15	0
Scn1a-PV	68	3378	1	1	TSeries-03102020-1005-002	opto alone control	1	500	16	0
Scn1a-PV	68	3378	1	1	TSeries-03102020-1005-002	opto alone control	1	500	17	0
Scn1a-PV	68	3378	1	1	TSeries-03102020-1005-002	opto alone control	1	500	18	0
Scn1a-PV	68	3378	1	1	TSeries-03102020-1005-002	opto alone control	1	500	19	0
Scn1a-PV	68	3378	1	1	TSeries-03102020-1005-002	opto alone control	1	500	20	0
Scn1a-PV	68	3378	1	1	TSeries-03102020-1005-002	opto alone control	1	500	21	0
Scn1a-PV	68	3378	1	1	TSeries-03102020-1005-002	opto alone control	1	500	22	0
Scn1a-PV	68	3378	1	1	TSeries-03102020-1005-002	opto alone control	1	500	23	0
Scn1a-PV	68	3378	1	1	TSeries-03102020-1005-002	opto alone control	1	500	24	0
Scn1a-PV	68	3378	1	1	TSeries-03102020-1005-002	opto alone control	1	500	25	0
Scn1a-PV	68	3378	1	1	TSeries-03102020-1005-002	opto alone control	1	500	26	0
Scn1a-PV	68	3378	1	1	TSeries-03102020-1005-002	opto alone control	1	500	27	0
Scn1a-PV	68	3378	1	1	TSeries-03102020-1005-002	opto alone control	1	500	28	0
Scn1a-PV	68	3378	1	1	TSeries-03102020-1005-002	opto alone control	1	500	29	0
Scn1a-PV	68	3378	1	1	TSeries-03102020-1005-002	opto alone control	1	500	30	0
Scn1a-PV	68	3378	1	1	TSeries-03102020-1005-002	opto alone control	1	500	31	0
Scn1a-PV	68	3378	1	1	TSeries-03102020-1005-002	opto alone control	1	500	32	0
Scn1a-PV	68	3378	1	1	TSeries-03102020-1005-002	opto alone control	1	500	33	0
Scn1a-PV	68	3378	1	1	TSeries-03102020-1005-002	opto alone control	1	500	34	0
Scn1a-PV	68	3378	1	1	TSeries-03102020-1005-002	opto alone control	1	500	35	0
Scn1a-PV	68	3378	1	1	TSeries-03102020-1005-002	opto alone control	1	500	36	0
Scn1a-PV	68	3378	1	1	TSeries-03102020-1005-002	opto alone control	1	500	37	0
Scn1a-PV	68	3378	1	1	TSeries-03102020-1005-002	opto alone control	1	500	38	0
Scn1a-PV	68	3378	1	1	TSeries-03102020-1005-002	opto alone control	1	500	39	0
Scn1a-PV	68	3378	1	1	TSeries-03102020-1005-002	opto alone control	1	500	40	0
Scn1a-PV	68	3378	1	1	TSeries-03102020-1005-002	opto alone control	1	500	41	0
Scn1a-PV	68	3378	1	1	TSeries-03102020-1005-002	opto alone control	1	500	42	0
Scn1a-PV	68	3378	1	1	TSeries-03102020-1005-006	electrical + opto	1	500	0	0
Scn1a-PV	68	3378	1	1	TSeries-03102020-1005-006	electrical + opto	1	500	1	0
Scn1a-PV	68	3378	1	1	TSeries-03102020-1005-006	electrical + opto	1	500	2	0
Scn1a-PV	68	3378	1	1	TSeries-03102020-1005-006	electrical + opto	1	500	3	0
Scn1a-PV	68	3378	1	1	TSeries-03102020-1005-006	electrical + opto	1	500	4	0
Scn1a-PV	68	3378	1	1	TSeries-03102020-1005-006	electrical + opto	1	500	5	0
Scn1a-PV	68	3378	1	1	TSeries-03102020-1005-006	electrical + opto	1	500	6	0
Scn1a-PV	68	3378	1	1	TSeries-03102020-1005-006	electrical + opto	1	500	7	0
Scn1a-PV	68	3378	1	1	TSeries-03102020-1005-006	electrical + opto	1	500	8	0
Scn1a-PV	68	3378	1	1	TSeries-03102020-1005-006	electrical + opto	1	500	9	0
Scn1a-PV	68	3378	1	1	TSeries-03102020-1005-006	electrical + opto	1	500	10	0
Scn1a-PV	68	3378	1	1	TSeries-03102020-1005-006	electrical + opto	1	500	11	0
Scn1a-PV	68	3378	1	1	TSeries-03102020-1005-006	electrical + opto	1	500	12	0
Scn1a-PV	68	3378	1	1	TSeries-03102020-1005-006	electrical + opto	1	500	13	0
Scn1a-PV	68	3378	1	1	TSeries-03102020-1005-006	electrical + opto	1	500	14	0
Scn1a-PV	68	3378	1	1	TSeries-03102020-1005-006	electrical + opto	1	500	15	0
Scn1a-PV	68	3378	1	1	TSeries-03102020-1005-006	electrical + opto	1	500	16	0
Scn1a-PV	68	3378	1	1	TSeries-03102020-1005-006	electrical + opto	1	500	17	0
Scn1a-PV	68	3378	1	1	TSeries-03102020-1005-006	electrical + opto	1	500	18	0
Scn1a-PV	68	3378	1	1	TSeries-03102020-1005-006	electrical + opto	1	500	19	0
Scn1a-PV	68	3378	1	1	TSeries-03102020-1005-006	electrical + opto	1	500	20	0
Scn1a-PV	68	3378	1	1	TSeries-03102020-1005-006	electrical + opto	1	500	21	1	0.139606
Scn1a-PV	68	3378	1	1	TSeries-03102020-1005-006	electrical + opto	1	500	22	0
Scn1a-PV	68	3378	1	1	TSeries-03102020-1005-006	electrical + opto	1	500	23	0
Scn1a-PV	68	3378	1	1	TSeries-03102020-1005-006	electrical + opto	1	500	24	0
Scn1a-PV	68	3378	1	1	TSeries-03102020-1005-006	electrical + opto	1	500	25	1	0.176186
Scn1a-PV	68	3378	1	1	TSeries-03102020-1005-006	electrical + opto	1	500	26	1	0.407297
Scn1a-PV	68	3378	1	1	TSeries-03102020-1005-006	electrical + opto	1	500	27	1	0.150906
Scn1a-PV	68	3378	1	1	TSeries-03102020-1005-006	electrical + opto	1	500	28	1	0.195681
Scn1a-PV	68	3378	1	1	TSeries-03102020-1005-006	electrical + opto	1	500	29	0
Scn1a-PV	68	3378	1	1	TSeries-03102020-1005-006	electrical + opto	1	500	30	0
Scn1a-PV	68	3378	1	1	TSeries-03102020-1005-006	electrical + opto	1	500	31	0
Scn1a-PV	68	3378	1	1	TSeries-03102020-1005-006	electrical + opto	1	500	32	0
Scn1a-PV	68	3378	1	1	TSeries-03102020-1005-006	electrical + opto	1	500	33	0
Scn1a-PV	68	3378	1	1	TSeries-03102020-1005-006	electrical + opto	1	500	34	0
Scn1a-PV	68	3378	1	1	TSeries-03102020-1005-006	electrical + opto	1	500	35	0
Scn1a-PV	68	3378	1	1	TSeries-03102020-1005-006	electrical + opto	1	500	36	1	0.312162
Scn1a-PV	68	3378	1	1	TSeries-03102020-1005-006	electrical + opto	1	500	37	1	0.205851
Scn1a-PV	68	3378	1	1	TSeries-03102020-1005-006	electrical + opto	1	500	38	1	0.148631
Scn1a-PV	68	3378	1	1	TSeries-03102020-1005-006	electrical + opto	1	500	39	0
Scn1a-PV	68	3378	1	1	TSeries-03102020-1005-006	electrical + opto	1	500	40	0
Scn1a-PV	68	3378	1	1	TSeries-03102020-1005-006	electrical + opto	1	500	41	1	0.188019
Scn1a-PV	68	3378	1	1	TSeries-03102020-1005-006	electrical + opto	1	500	42	1	1.36507
Scn1a-PV	71	3355	1	1	TSeries-03122020-1111-001	electrical	1	500	0	0
Scn1a-PV	71	3355	1	1	TSeries-03122020-1111-001	electrical	1	500	1	1	0.100909
Scn1a-PV	71	3355	1	1	TSeries-03122020-1111-001	electrical	1	500	2	0
Scn1a-PV	71	3355	1	1	TSeries-03122020-1111-001	electrical	1	500	3	0
Scn1a-PV	71	3355	1	1	TSeries-03122020-1111-001	electrical	1	500	4	1	0.182596
Scn1a-PV	71	3355	1	1	TSeries-03122020-1111-001	electrical	1	500	5	1	0.365659
Scn1a-PV	71	3355	1	1	TSeries-03122020-1111-001	electrical	1	500	6	1	0.190107
Scn1a-PV	71	3355	1	1	TSeries-03122020-1111-001	electrical	1	500	7	1	0.218045
Scn1a-PV	71	3355	1	1	TSeries-03122020-1111-001	electrical	1	500	8	1	0.281154
Scn1a-PV	71	3355	1	1	TSeries-03122020-1111-001	electrical	1	500	9	1	0.280683
Scn1a-PV	71	3355	1	1	TSeries-03122020-1111-001	electrical	1	500	10	0
Scn1a-PV	71	3355	1	1	TSeries-03122020-1111-001	electrical	1	500	11	0
Scn1a-PV	71	3355	1	1	TSeries-03122020-1111-001	electrical	1	500	12	0
Scn1a-PV	71	3355	1	1	TSeries-03122020-1111-001	electrical	1	500	13	0
Scn1a-PV	71	3355	1	1	TSeries-03122020-1111-001	electrical	1	500	14	0
Scn1a-PV	71	3355	1	1	TSeries-03122020-1111-001	electrical	1	500	15	0
Scn1a-PV	71	3355	1	1	TSeries-03122020-1111-001	electrical	1	500	16	0
Scn1a-PV	71	3355	1	1	TSeries-03122020-1111-001	electrical	1	500	17	0
Scn1a-PV	71	3355	1	1	TSeries-03122020-1111-001	electrical	1	500	18	0
Scn1a-PV	71	3355	1	1	TSeries-03122020-1111-001	electrical	1	500	19	0
Scn1a-PV	71	3355	1	1	TSeries-03122020-1111-001	electrical	1	500	20	0
Scn1a-PV	71	3355	1	1	TSeries-03122020-1111-001	electrical	1	500	21	1	0.394447
Scn1a-PV	71	3355	1	1	TSeries-03122020-1111-001	electrical	1	500	22	1	0.347129
Scn1a-PV	71	3355	1	1	TSeries-03122020-1111-001	electrical	1	500	23	1	0.26145
Scn1a-PV	71	3355	1	1	TSeries-03122020-1111-001	electrical	1	500	24	0
Scn1a-PV	71	3355	1	1	TSeries-03122020-1111-001	electrical	1	500	25	0
Scn1a-PV	71	3355	1	1	TSeries-03122020-1111-001	electrical	1	500	26	0
Scn1a-PV	71	3355	1	1	TSeries-03122020-1111-001	electrical	1	500	27	0
Scn1a-PV	71	3355	1	1	TSeries-03122020-1111-001	electrical	1	500	28	1	0.180809
Scn1a-PV	71	3355	1	1	TSeries-03122020-1111-001	electrical	1	500	29	0
Scn1a-PV	71	3355	1	1	TSeries-03122020-1111-001	electrical	1	500	30	1	0.0925458
Scn1a-PV	71	3355	1	1	TSeries-03122020-1111-001	electrical	1	500	31	1	0.143582
Scn1a-PV	71	3355	1	1	TSeries-03122020-1111-001	electrical	1	500	32	0
Scn1a-PV	71	3355	1	1	TSeries-03122020-1111-001	electrical	1	500	33	1	0.147492
Scn1a-PV	71	3355	1	1	TSeries-03122020-1111-001	electrical	1	500	34	1	0.159524
Scn1a-PV	71	3355	1	1	TSeries-03122020-1111-001	electrical	1	500	35	1	0.350805
Scn1a-PV	71	3355	1	1	TSeries-03122020-1111-001	electrical	1	500	36	1	0.260763
Scn1a-PV	71	3355	1	1	TSeries-03122020-1111-001	electrical	1	500	37	1	0.579519
Scn1a-PV	71	3355	1	1	TSeries-03122020-1111-001	electrical	1	500	38	1	0.125877
Scn1a-PV	71	3355	1	1	TSeries-03122020-1111-001	electrical	1	500	39	0
Scn1a-PV	71	3355	1	1	TSeries-03122020-1111-001	electrical	1	500	40	0
Scn1a-PV	71	3355	1	1	TSeries-03122020-1111-001	electrical	1	500	41	0
Scn1a-PV	71	3355	1	1	TSeries-03122020-1111-001	electrical	1	500	42	0
Scn1a-PV	71	3355	1	1	TSeries-03122020-1111-001	electrical	1	500	43	0
Scn1a-PV	71	3355	1	1	TSeries-03122020-1111-001	electrical	1	500	44	0
Scn1a-PV	71	3355	1	1	TSeries-03122020-1111-001	electrical	1	500	45	1	0.684386
Scn1a-PV	71	3355	1	1	TSeries-03122020-1111-001	electrical	1	500	46	0
Scn1a-PV	71	3355	1	1	TSeries-03122020-1111-001	electrical	1	500	47	0
Scn1a-PV	71	3355	1	1	TSeries-03122020-1111-001	electrical	1	500	48	0
Scn1a-PV	71	3355	1	1	TSeries-03122020-1111-001	electrical	1	500	49	0
Scn1a-PV	71	3355	1	1	TSeries-03122020-1111-001	electrical	1	500	50	0
Scn1a-PV	71	3355	1	1	TSeries-03122020-1111-001	electrical	1	500	51	1	0.600194
Scn1a-PV	71	3355	1	1	TSeries-03122020-1111-001	electrical	1	500	52	0
Scn1a-PV	71	3355	1	1	TSeries-03122020-1111-001	electrical	1	500	53	0
Scn1a-PV	71	3355	1	1	TSeries-03122020-1111-001	electrical	1	500	54	0
Scn1a-PV	71	3355	1	1	TSeries-03122020-1111-001	electrical	1	500	55	0
Scn1a-PV	71	3355	1	1	TSeries-03122020-1111-001	electrical	1	500	56	0
Scn1a-PV	71	3355	1	1	TSeries-03122020-1111-001	electrical	1	500	57	0
Scn1a-PV	71	3355	1	1	TSeries-03122020-1111-001	electrical	1	500	58	1	0.419259
Scn1a-PV	71	3355	1	1	TSeries-03122020-1111-001	electrical	1	500	59	1	0.274079
Scn1a-PV	71	3355	1	1	TSeries-03122020-1111-001	electrical	1	500	60	0
Scn1a-PV	71	3355	1	1	TSeries-03122020-1111-001	electrical	1	500	61	1	0.481974
Scn1a-PV	71	3355	1	1	TSeries-03122020-1111-001	electrical	1	500	62	1	0.214168
Scn1a-PV	71	3355	1	1	TSeries-03122020-1111-001	electrical	1	500	63	1	0.346812
Scn1a-PV	71	3355	1	1	TSeries-03122020-1111-001	electrical	1	500	64	0
Scn1a-PV	71	3355	1	1	TSeries-03122020-1111-001	electrical	1	500	65	0
Scn1a-PV	71	3355	1	1	TSeries-03122020-1111-001	electrical	1	500	66	0
Scn1a-PV	71	3355	1	1	TSeries-03122020-1111-001	electrical	1	500	67	0
Scn1a-PV	71	3355	1	1	TSeries-03122020-1111-001	electrical	1	500	68	0
Scn1a-PV	71	3355	1	1	TSeries-03122020-1111-001	electrical	1	500	69	0
Scn1a-PV	71	3355	1	1	TSeries-03122020-1111-001	electrical	1	500	70	1	0.148022
Scn1a-PV	71	3355	1	1	TSeries-03122020-1111-002	opto alone control	1	500	0	0
Scn1a-PV	71	3355	1	1	TSeries-03122020-1111-002	opto alone control	1	500	1	0
Scn1a-PV	71	3355	1	1	TSeries-03122020-1111-002	opto alone control	1	500	2	0
Scn1a-PV	71	3355	1	1	TSeries-03122020-1111-002	opto alone control	1	500	3	0
Scn1a-PV	71	3355	1	1	TSeries-03122020-1111-002	opto alone control	1	500	4	0
Scn1a-PV	71	3355	1	1	TSeries-03122020-1111-002	opto alone control	1	500	5	0
Scn1a-PV	71	3355	1	1	TSeries-03122020-1111-002	opto alone control	1	500	6	0
Scn1a-PV	71	3355	1	1	TSeries-03122020-1111-002	opto alone control	1	500	7	0
Scn1a-PV	71	3355	1	1	TSeries-03122020-1111-002	opto alone control	1	500	8	0
Scn1a-PV	71	3355	1	1	TSeries-03122020-1111-002	opto alone control	1	500	9	0
Scn1a-PV	71	3355	1	1	TSeries-03122020-1111-002	opto alone control	1	500	10	0
Scn1a-PV	71	3355	1	1	TSeries-03122020-1111-002	opto alone control	1	500	11	0
Scn1a-PV	71	3355	1	1	TSeries-03122020-1111-002	opto alone control	1	500	12	0
Scn1a-PV	71	3355	1	1	TSeries-03122020-1111-002	opto alone control	1	500	13	0
Scn1a-PV	71	3355	1	1	TSeries-03122020-1111-002	opto alone control	1	500	14	0
Scn1a-PV	71	3355	1	1	TSeries-03122020-1111-002	opto alone control	1	500	15	0
Scn1a-PV	71	3355	1	1	TSeries-03122020-1111-002	opto alone control	1	500	16	0
Scn1a-PV	71	3355	1	1	TSeries-03122020-1111-002	opto alone control	1	500	17	0
Scn1a-PV	71	3355	1	1	TSeries-03122020-1111-002	opto alone control	1	500	18	0
Scn1a-PV	71	3355	1	1	TSeries-03122020-1111-002	opto alone control	1	500	19	0
Scn1a-PV	71	3355	1	1	TSeries-03122020-1111-002	opto alone control	1	500	20	0
Scn1a-PV	71	3355	1	1	TSeries-03122020-1111-002	opto alone control	1	500	21	0
Scn1a-PV	71	3355	1	1	TSeries-03122020-1111-002	opto alone control	1	500	22	0
Scn1a-PV	71	3355	1	1	TSeries-03122020-1111-002	opto alone control	1	500	23	0
Scn1a-PV	71	3355	1	1	TSeries-03122020-1111-002	opto alone control	1	500	24	0
Scn1a-PV	71	3355	1	1	TSeries-03122020-1111-002	opto alone control	1	500	25	0
Scn1a-PV	71	3355	1	1	TSeries-03122020-1111-002	opto alone control	1	500	26	0
Scn1a-PV	71	3355	1	1	TSeries-03122020-1111-002	opto alone control	1	500	27	0
Scn1a-PV	71	3355	1	1	TSeries-03122020-1111-002	opto alone control	1	500	28	0
Scn1a-PV	71	3355	1	1	TSeries-03122020-1111-002	opto alone control	1	500	29	0
Scn1a-PV	71	3355	1	1	TSeries-03122020-1111-002	opto alone control	1	500	30	0
Scn1a-PV	71	3355	1	1	TSeries-03122020-1111-002	opto alone control	1	500	31	0
Scn1a-PV	71	3355	1	1	TSeries-03122020-1111-002	opto alone control	1	500	32	0
Scn1a-PV	71	3355	1	1	TSeries-03122020-1111-002	opto alone control	1	500	33	0
Scn1a-PV	71	3355	1	1	TSeries-03122020-1111-002	opto alone control	1	500	34	0
Scn1a-PV	71	3355	1	1	TSeries-03122020-1111-002	opto alone control	1	500	35	0
Scn1a-PV	71	3355	1	1	TSeries-03122020-1111-002	opto alone control	1	500	36	0
Scn1a-PV	71	3355	1	1	TSeries-03122020-1111-002	opto alone control	1	500	37	0
Scn1a-PV	71	3355	1	1	TSeries-03122020-1111-002	opto alone control	1	500	38	0
Scn1a-PV	71	3355	1	1	TSeries-03122020-1111-002	opto alone control	1	500	39	0
Scn1a-PV	71	3355	1	1	TSeries-03122020-1111-002	opto alone control	1	500	40	0
Scn1a-PV	71	3355	1	1	TSeries-03122020-1111-002	opto alone control	1	500	41	0
Scn1a-PV	71	3355	1	1	TSeries-03122020-1111-002	opto alone control	1	500	42	0
Scn1a-PV	71	3355	1	1	TSeries-03122020-1111-002	opto alone control	1	500	43	0
Scn1a-PV	71	3355	1	1	TSeries-03122020-1111-002	opto alone control	1	500	44	0
Scn1a-PV	71	3355	1	1	TSeries-03122020-1111-002	opto alone control	1	500	45	0
Scn1a-PV	71	3355	1	1	TSeries-03122020-1111-002	opto alone control	1	500	46	0
Scn1a-PV	71	3355	1	1	TSeries-03122020-1111-002	opto alone control	1	500	47	0
Scn1a-PV	71	3355	1	1	TSeries-03122020-1111-002	opto alone control	1	500	48	0
Scn1a-PV	71	3355	1	1	TSeries-03122020-1111-002	opto alone control	1	500	49	0
Scn1a-PV	71	3355	1	1	TSeries-03122020-1111-002	opto alone control	1	500	50	0
Scn1a-PV	71	3355	1	1	TSeries-03122020-1111-002	opto alone control	1	500	51	0
Scn1a-PV	71	3355	1	1	TSeries-03122020-1111-002	opto alone control	1	500	52	0
Scn1a-PV	71	3355	1	1	TSeries-03122020-1111-002	opto alone control	1	500	53	0
Scn1a-PV	71	3355	1	1	TSeries-03122020-1111-002	opto alone control	1	500	54	0
Scn1a-PV	71	3355	1	1	TSeries-03122020-1111-002	opto alone control	1	500	55	0
Scn1a-PV	71	3355	1	1	TSeries-03122020-1111-002	opto alone control	1	500	56	0
Scn1a-PV	71	3355	1	1	TSeries-03122020-1111-002	opto alone control	1	500	57	0
Scn1a-PV	71	3355	1	1	TSeries-03122020-1111-002	opto alone control	1	500	58	0
Scn1a-PV	71	3355	1	1	TSeries-03122020-1111-002	opto alone control	1	500	59	0
Scn1a-PV	71	3355	1	1	TSeries-03122020-1111-002	opto alone control	1	500	60	0
Scn1a-PV	71	3355	1	1	TSeries-03122020-1111-002	opto alone control	1	500	61	0
Scn1a-PV	71	3355	1	1	TSeries-03122020-1111-002	opto alone control	1	500	62	0
Scn1a-PV	71	3355	1	1	TSeries-03122020-1111-002	opto alone control	1	500	63	0
Scn1a-PV	71	3355	1	1	TSeries-03122020-1111-002	opto alone control	1	500	64	0
Scn1a-PV	71	3355	1	1	TSeries-03122020-1111-002	opto alone control	1	500	65	0
Scn1a-PV	71	3355	1	1	TSeries-03122020-1111-002	opto alone control	1	500	66	0
Scn1a-PV	71	3355	1	1	TSeries-03122020-1111-002	opto alone control	1	500	67	0
Scn1a-PV	71	3355	1	1	TSeries-03122020-1111-002	opto alone control	1	500	68	0
Scn1a-PV	71	3355	1	1	TSeries-03122020-1111-002	opto alone control	1	500	69	0
Scn1a-PV	71	3355	1	1	TSeries-03122020-1111-002	opto alone control	1	500	70	0
Scn1a-PV	71	3355	1	1	TSeries-03122020-1111-006	electrical + opto	1	500	0	0
Scn1a-PV	71	3355	1	1	TSeries-03122020-1111-006	electrical + opto	1	500	1	0
Scn1a-PV	71	3355	1	1	TSeries-03122020-1111-006	electrical + opto	1	500	2	0
Scn1a-PV	71	3355	1	1	TSeries-03122020-1111-006	electrical + opto	1	500	3	0
Scn1a-PV	71	3355	1	1	TSeries-03122020-1111-006	electrical + opto	1	500	4	0
Scn1a-PV	71	3355	1	1	TSeries-03122020-1111-006	electrical + opto	1	500	5	0
Scn1a-PV	71	3355	1	1	TSeries-03122020-1111-006	electrical + opto	1	500	6	0
Scn1a-PV	71	3355	1	1	TSeries-03122020-1111-006	electrical + opto	1	500	7	0
Scn1a-PV	71	3355	1	1	TSeries-03122020-1111-006	electrical + opto	1	500	8	0
Scn1a-PV	71	3355	1	1	TSeries-03122020-1111-006	electrical + opto	1	500	9	0
Scn1a-PV	71	3355	1	1	TSeries-03122020-1111-006	electrical + opto	1	500	10	0
Scn1a-PV	71	3355	1	1	TSeries-03122020-1111-006	electrical + opto	1	500	11	0
Scn1a-PV	71	3355	1	1	TSeries-03122020-1111-006	electrical + opto	1	500	12	0
Scn1a-PV	71	3355	1	1	TSeries-03122020-1111-006	electrical + opto	1	500	13	0
Scn1a-PV	71	3355	1	1	TSeries-03122020-1111-006	electrical + opto	1	500	14	0
Scn1a-PV	71	3355	1	1	TSeries-03122020-1111-006	electrical + opto	1	500	15	0
Scn1a-PV	71	3355	1	1	TSeries-03122020-1111-006	electrical + opto	1	500	16	0
Scn1a-PV	71	3355	1	1	TSeries-03122020-1111-006	electrical + opto	1	500	17	0
Scn1a-PV	71	3355	1	1	TSeries-03122020-1111-006	electrical + opto	1	500	18	0
Scn1a-PV	71	3355	1	1	TSeries-03122020-1111-006	electrical + opto	1	500	19	0
Scn1a-PV	71	3355	1	1	TSeries-03122020-1111-006	electrical + opto	1	500	20	0
Scn1a-PV	71	3355	1	1	TSeries-03122020-1111-006	electrical + opto	1	500	21	0
Scn1a-PV	71	3355	1	1	TSeries-03122020-1111-006	electrical + opto	1	500	22	0
Scn1a-PV	71	3355	1	1	TSeries-03122020-1111-006	electrical + opto	1	500	23	0
Scn1a-PV	71	3355	1	1	TSeries-03122020-1111-006	electrical + opto	1	500	24	0
[truncated: 595 more rows]

## Sheet: SST
Genotype	age	mouse	slice	field	File name	stim type	pulses	power	Cell Num	Activation	Amplitude
Scn1a-SST	69	3214	1	1	TSeries-01012009-0002-009	electrical	1	500	0	0
Scn1a-SST	69	3214	1	1	TSeries-01012009-0002-009	electrical	1	500	1	1	2.02279
Scn1a-SST	69	3214	1	1	TSeries-01012009-0002-009	electrical	1	500	2	1	1.49648
Scn1a-SST	69	3214	1	1	TSeries-01012009-0002-009	electrical	1	500	3	0
Scn1a-SST	69	3214	1	1	TSeries-01012009-0002-009	electrical	1	500	4	0
Scn1a-SST	69	3214	1	1	TSeries-01012009-0002-009	electrical	1	500	5	1	0.162182
Scn1a-SST	69	3214	1	1	TSeries-01012009-0002-009	electrical	1	500	6	1	0.779365
Scn1a-SST	69	3214	1	1	TSeries-01012009-0002-009	electrical	1	500	7	1	0.494525
Scn1a-SST	69	3214	1	1	TSeries-01012009-0002-009	electrical	1	500	8	1	0.290776
Scn1a-SST	69	3214	1	1	TSeries-01012009-0002-009	electrical	1	500	9	0
Scn1a-SST	69	3214	1	1	TSeries-01012009-0002-009	electrical	1	500	10	1	0.345969
Scn1a-SST	69	3214	1	1	TSeries-01012009-0002-009	electrical	1	500	11	0
Scn1a-SST	69	3214	1	1	TSeries-01012009-0002-009	electrical	1	500	12	0
Scn1a-SST	69	3214	1	1	TSeries-01012009-0002-009	electrical	1	500	13	1	0.272204
Scn1a-SST	69	3214	1	1	TSeries-01012009-0002-009	electrical	1	500	14	1	0.169753
Scn1a-SST	69	3214	1	1	TSeries-01012009-0002-009	electrical	1	500	15	1	0.149852
Scn1a-SST	69	3214	1	1	TSeries-01012009-0002-009	electrical	1	500	16	1	0.179662
Scn1a-SST	69	3214	1	1	TSeries-01012009-0002-011	opto alone control	1	500	0	0
Scn1a-SST	69	3214	1	1	TSeries-01012009-0002-011	opto alone control	1	500	1	0
Scn1a-SST	69	3214	1	1	TSeries-01012009-0002-011	opto alone control	1	500	2	0
Scn1a-SST	69	3214	1	1	TSeries-01012009-0002-011	opto alone control	1	500	3	0
Scn1a-SST	69	3214	1	1	TSeries-01012009-0002-011	opto alone control	1	500	4	0
Scn1a-SST	69	3214	1	1	TSeries-01012009-0002-011	opto alone control	1	500	5	0
Scn1a-SST	69	3214	1	1	TSeries-01012009-0002-011	opto alone control	1	500	6	0
Scn1a-SST	69	3214	1	1	TSeries-01012009-0002-011	opto alone control	1	500	7	0
Scn1a-SST	69	3214	1	1	TSeries-01012009-0002-011	opto alone control	1	500	8	0
Scn1a-SST	69	3214	1	1	TSeries-01012009-0002-011	opto alone control	1	500	9	0
Scn1a-SST	69	3214	1	1	TSeries-01012009-0002-011	opto alone control	1	500	10	0
Scn1a-SST	69	3214	1	1	TSeries-01012009-0002-011	opto alone control	1	500	11	0
Scn1a-SST	69	3214	1	1	TSeries-01012009-0002-011	opto alone control	1	500	12	0
Scn1a-SST	69	3214	1	1	TSeries-01012009-0002-011	opto alone control	1	500	13	0
Scn1a-SST	69	3214	1	1	TSeries-01012009-0002-011	opto alone control	1	500	14	0
Scn1a-SST	69	3214	1	1	TSeries-01012009-0002-011	opto alone control	1	500	15	0
Scn1a-SST	69	3214	1	1	TSeries-01012009-0002-011	opto alone control	1	500	16	0
Scn1a-SST	69	3214	1	1	TSeries-01012009-0002-013	electrical + opto	1	500	0	0
Scn1a-SST	69	3214	1	1	TSeries-01012009-0002-013	electrical + opto	1	500	1	1	0.428659
Scn1a-SST	69	3214	1	1	TSeries-01012009-0002-013	electrical + opto	1	500	2	1	0.393648
Scn1a-SST	69	3214	1	1	TSeries-01012009-0002-013	electrical + opto	1	500	3	0
Scn1a-SST	69	3214	1	1	TSeries-01012009-0002-013	electrical + opto	1	500	4	0
Scn1a-SST	69	3214	1	1	TSeries-01012009-0002-013	electrical + opto	1	500	5	0
Scn1a-SST	69	3214	1	1	TSeries-01012009-0002-013	electrical + opto	1	500	6	1	0.256777
Scn1a-SST	69	3214	1	1	TSeries-01012009-0002-013	electrical + opto	1	500	7	1	0.334727
Scn1a-SST	69	3214	1	1	TSeries-01012009-0002-013	electrical + opto	1	500	8	1	0.225714
Scn1a-SST	69	3214	1	1	TSeries-01012009-0002-013	electrical + opto	1	500	9	1	0.0956045
Scn1a-SST	69	3214	1	1	TSeries-01012009-0002-013	electrical + opto	1	500	10	0
Scn1a-SST	69	3214	1	1	TSeries-01012009-0002-013	electrical + opto	1	500	11	0
Scn1a-SST	69	3214	1	1	TSeries-01012009-0002-013	electrical + opto	1	500	12	0
Scn1a-SST	69	3214	1	1	TSeries-01012009-0002-013	electrical + opto	1	500	13	1	0.0870971
Scn1a-SST	69	3214	1	1	TSeries-01012009-0002-013	electrical + opto	1	500	14	0
Scn1a-SST	69	3214	1	1	TSeries-01012009-0002-013	electrical + opto	1	500	15	1	0.104508
Scn1a-SST	69	3214	1	1	TSeries-01012009-0002-013	electrical + opto	1	500	16	0
Scn1a-SST	68	3252	2	2	TSeries-01292020-1041-009	electrical	1	500	0	0
Scn1a-SST	68	3252	2	2	TSeries-01292020-1041-009	electrical	1	500	1	0
Scn1a-SST	68	3252	2	2	TSeries-01292020-1041-009	electrical	1	500	2	0
Scn1a-SST	68	3252	2	2	TSeries-01292020-1041-009	electrical	1	500	3	0
Scn1a-SST	68	3252	2	2	TSeries-01292020-1041-009	electrical	1	500	4	0
Scn1a-SST	68	3252	2	2	TSeries-01292020-1041-009	electrical	1	500	5	0
Scn1a-SST	68	3252	2	2	TSeries-01292020-1041-009	electrical	1	500	6	0
Scn1a-SST	68	3252	2	2	TSeries-01292020-1041-009	electrical	1	500	7	0
Scn1a-SST	68	3252	2	2	TSeries-01292020-1041-009	electrical	1	500	8	0
Scn1a-SST	68	3252	2	2	TSeries-01292020-1041-009	electrical	1	500	9	0
Scn1a-SST	68	3252	2	2	TSeries-01292020-1041-009	electrical	1	500	10	0
Scn1a-SST	68	3252	2	2	TSeries-01292020-1041-009	electrical	1	500	11	0
Scn1a-SST	68	3252	2	2	TSeries-01292020-1041-009	electrical	1	500	12	0
Scn1a-SST	68	3252	2	2	TSeries-01292020-1041-009	electrical	1	500	13	0
Scn1a-SST	68	3252	2	2	TSeries-01292020-1041-009	electrical	1	500	14	0
Scn1a-SST	68	3252	2	2	TSeries-01292020-1041-009	electrical	1	500	15	0
Scn1a-SST	68	3252	2	2	TSeries-01292020-1041-009	electrical	1	500	16	0
Scn1a-SST	68	3252	2	2	TSeries-01292020-1041-009	electrical	1	500	17	0
Scn1a-SST	68	3252	2	2	TSeries-01292020-1041-009	electrical	1	500	18	0
Scn1a-SST	68	3252	2	2	TSeries-01292020-1041-009	electrical	1	500	19	0
Scn1a-SST	68	3252	2	2	TSeries-01292020-1041-009	electrical	1	500	20	0
Scn1a-SST	68	3252	2	2	TSeries-01292020-1041-009	electrical	1	500	21	0
Scn1a-SST	68	3252	2	2	TSeries-01292020-1041-009	electrical	1	500	22	0
Scn1a-SST	68	3252	2	2	TSeries-01292020-1041-009	electrical	1	500	23	0
Scn1a-SST	68	3252	2	2	TSeries-01292020-1041-009	electrical	1	500	24	0
Scn1a-SST	68	3252	2	2	TSeries-01292020-1041-009	electrical	1	500	25	0
Scn1a-SST	68	3252	2	2	TSeries-01292020-1041-009	electrical	1	500	26	0
Scn1a-SST	68	3252	2	2	TSeries-01292020-1041-009	electrical	1	500	27	0
Scn1a-SST	68	3252	2	2	TSeries-01292020-1041-009	electrical	1	500	28	0
Scn1a-SST	68	3252	2	2	TSeries-01292020-1041-009	electrical	1	500	29	0
Scn1a-SST	68	3252	2	2	TSeries-01292020-1041-009	electrical	1	500	30	0
Scn1a-SST	68	3252	2	2	TSeries-01292020-1041-009	electrical	1	500	31	0
Scn1a-SST	68	3252	2	2	TSeries-01292020-1041-009	electrical	1	500	32	0
Scn1a-SST	68	3252	2	2	TSeries-01292020-1041-009	electrical	1	500	33	0
Scn1a-SST	68	3252	2	2	TSeries-01292020-1041-009	electrical	1	500	34	0
Scn1a-SST	68	3252	2	2	TSeries-01292020-1041-009	electrical	1	500	35	0
Scn1a-SST	68	3252	2	2	TSeries-01292020-1041-009	electrical	1	500	36	0
Scn1a-SST	68	3252	2	2	TSeries-01292020-1041-009	electrical	1	500	37	0
Scn1a-SST	68	3252	2	2	TSeries-01292020-1041-009	electrical	1	500	38	0
Scn1a-SST	68	3252	2	2	TSeries-01292020-1041-009	electrical	1	500	39	0
Scn1a-SST	68	3252	2	2	TSeries-01292020-1041-009	electrical	1	500	40	0
Scn1a-SST	68	3252	2	2	TSeries-01292020-1041-009	electrical	1	500	41	1	0.557829
Scn1a-SST	68	3252	2	2	TSeries-01292020-1041-009	electrical	1	500	42	0
Scn1a-SST	68	3252	2	2	TSeries-01292020-1041-009	electrical	1	500	43	0
Scn1a-SST	68	3252	2	2	TSeries-01292020-1041-009	electrical	1	500	44	0
Scn1a-SST	68	3252	2	2	TSeries-01292020-1041-009	electrical	1	500	45	0
Scn1a-SST	68	3252	2	2	TSeries-01292020-1041-009	electrical	1	500	46	0
Scn1a-SST	68	3252	2	2	TSeries-01292020-1041-009	electrical	1	500	47	0
Scn1a-SST	68	3252	2	2	TSeries-01292020-1041-009	electrical	1	500	48	0
Scn1a-SST	68	3252	2	2	TSeries-01292020-1041-009	electrical	1	500	49	0
Scn1a-SST	68	3252	2	2	TSeries-01292020-1041-009	electrical	1	500	50	0
Scn1a-SST	68	3252	2	2	TSeries-01292020-1041-009	electrical	1	500	51	0
Scn1a-SST	68	3252	2	2	TSeries-01292020-1041-009	electrical	1	500	52	0
Scn1a-SST	68	3252	2	2	TSeries-01292020-1041-009	electrical	1	500	53	0
Scn1a-SST	68	3252	2	2	TSeries-01292020-1041-009	electrical	1	500	54	0
Scn1a-SST	68	3252	2	2	TSeries-01292020-1041-009	electrical	1	500	55	0
Scn1a-SST	68	3252	2	2	TSeries-01292020-1041-009	electrical	1	500	56	0
Scn1a-SST	68	3252	2	2	TSeries-01292020-1041-009	electrical	1	500	57	0
Scn1a-SST	68	3252	2	2	TSeries-01292020-1041-009	electrical	1	500	58	0
Scn1a-SST	68	3252	2	2	TSeries-01292020-1041-009	electrical	1	500	59	0
Scn1a-SST	68	3252	2	2	TSeries-01292020-1041-009	electrical	1	500	60	0
Scn1a-SST	68	3252	2	2	TSeries-01292020-1041-009	electrical	1	500	61	1	1.15186
Scn1a-SST	68	3252	2	2	TSeries-01292020-1041-009	electrical	1	500	62	0
Scn1a-SST	68	3252	2	2	TSeries-01292020-1041-009	electrical	1	500	63	0
Scn1a-SST	68	3252	2	2	TSeries-01292020-1041-009	electrical	1	500	64	0
Scn1a-SST	68	3252	2	2	TSeries-01292020-1041-009	electrical	1	500	65	1	0.407813
Scn1a-SST	68	3252	2	2	TSeries-01292020-1041-009	electrical	1	500	66	1	0.216912
Scn1a-SST	68	3252	2	2	TSeries-01292020-1041-009	electrical	1	500	67	0
Scn1a-SST	68	3252	2	2	TSeries-01292020-1041-009	electrical	1	500	68	0
Scn1a-SST	68	3252	2	2	TSeries-01292020-1041-009	electrical	1	500	69	0
Scn1a-SST	68	3252	2	2	TSeries-01292020-1041-009	electrical	1	500	70	0
Scn1a-SST	68	3252	2	2	TSeries-01292020-1041-009	electrical	1	500	71	0
Scn1a-SST	68	3252	2	2	TSeries-01292020-1041-009	electrical	1	500	72	0
Scn1a-SST	68	3252	2	2	TSeries-01292020-1041-010	opto alone control	1	500	0	0
Scn1a-SST	68	3252	2	2	TSeries-01292020-1041-010	opto alone control	1	500	1	0
Scn1a-SST	68	3252	2	2	TSeries-01292020-1041-010	opto alone control	1	500	2	0
Scn1a-SST	68	3252	2	2	TSeries-01292020-1041-010	opto alone control	1	500	3	0
Scn1a-SST	68	3252	2	2	TSeries-01292020-1041-010	opto alone control	1	500	4	0
Scn1a-SST	68	3252	2	2	TSeries-01292020-1041-010	opto alone control	1	500	5	0
Scn1a-SST	68	3252	2	2	TSeries-01292020-1041-010	opto alone control	1	500	6	0
Scn1a-SST	68	3252	2	2	TSeries-01292020-1041-010	opto alone control	1	500	7	0
Scn1a-SST	68	3252	2	2	TSeries-01292020-1041-010	opto alone control	1	500	8	0
Scn1a-SST	68	3252	2	2	TSeries-01292020-1041-010	opto alone control	1	500	9	0
Scn1a-SST	68	3252	2	2	TSeries-01292020-1041-010	opto alone control	1	500	10	0
Scn1a-SST	68	3252	2	2	TSeries-01292020-1041-010	opto alone control	1	500	11	0
Scn1a-SST	68	3252	2	2	TSeries-01292020-1041-010	opto alone control	1	500	12	0
Scn1a-SST	68	3252	2	2	TSeries-01292020-1041-010	opto alone control	1	500	13	0
Scn1a-SST	68	3252	2	2	TSeries-01292020-1041-010	opto alone control	1	500	14	0
Scn1a-SST	68	3252	2	2	TSeries-01292020-1041-010	opto alone control	1	500	15	0
Scn1a-SST	68	3252	2	2	TSeries-01292020-1041-010	opto alone control	1	500	16	0
Scn1a-SST	68	3252	2	2	TSeries-01292020-1041-010	opto alone control	1	500	17	0
Scn1a-SST	68	3252	2	2	TSeries-01292020-1041-010	opto alone control	1	500	18	0
Scn1a-SST	68	3252	2	2	TSeries-01292020-1041-010	opto alone control	1	500	19	0
Scn1a-SST	68	3252	2	2	TSeries-01292020-1041-010	opto alone control	1	500	20	0
Scn1a-SST	68	3252	2	2	TSeries-01292020-1041-010	opto alone control	1	500	21	0
Scn1a-SST	68	3252	2	2	TSeries-01292020-1041-010	opto alone control	1	500	22	0
Scn1a-SST	68	3252	2	2	TSeries-01292020-1041-010	opto alone control	1	500	23	0
Scn1a-SST	68	3252	2	2	TSeries-01292020-1041-010	opto alone control	1	500	24	0
Scn1a-SST	68	3252	2	2	TSeries-01292020-1041-010	opto alone control	1	500	25	0
Scn1a-SST	68	3252	2	2	TSeries-01292020-1041-010	opto alone control	1	500	26	0
Scn1a-SST	68	3252	2	2	TSeries-01292020-1041-010	opto alone control	1	500	27	0
Scn1a-SST	68	3252	2	2	TSeries-01292020-1041-010	opto alone control	1	500	28	0
Scn1a-SST	68	3252	2	2	TSeries-01292020-1041-010	opto alone control	1	500	29	0
Scn1a-SST	68	3252	2	2	TSeries-01292020-1041-010	opto alone control	1	500	30	0
Scn1a-SST	68	3252	2	2	TSeries-01292020-1041-010	opto alone control	1	500	31	0
Scn1a-SST	68	3252	2	2	TSeries-01292020-1041-010	opto alone control	1	500	32	0
Scn1a-SST	68	3252	2	2	TSeries-01292020-1041-010	opto alone control	1	500	33	0
Scn1a-SST	68	3252	2	2	TSeries-01292020-1041-010	opto alone control	1	500	34	0
Scn1a-SST	68	3252	2	2	TSeries-01292020-1041-010	opto alone control	1	500	35	0
Scn1a-SST	68	3252	2	2	TSeries-01292020-1041-010	opto alone control	1	500	36	0
Scn1a-SST	68	3252	2	2	TSeries-01292020-1041-010	opto alone control	1	500	37	0
Scn1a-SST	68	3252	2	2	TSeries-01292020-1041-010	opto alone control	1	500	38	0
Scn1a-SST	68	3252	2	2	TSeries-01292020-1041-010	opto alone control	1	500	39	0
Scn1a-SST	68	3252	2	2	TSeries-01292020-1041-010	opto alone control	1	500	40	0
Scn1a-SST	68	3252	2	2	TSeries-01292020-1041-010	opto alone control	1	500	41	0
Scn1a-SST	68	3252	2	2	TSeries-01292020-1041-010	opto alone control	1	500	42	0
Scn1a-SST	68	3252	2	2	TSeries-01292020-1041-010	opto alone control	1	500	43	0
Scn1a-SST	68	3252	2	2	TSeries-01292020-1041-010	opto alone control	1	500	44	0
Scn1a-SST	68	3252	2	2	TSeries-01292020-1041-010	opto alone control	1	500	45	0
Scn1a-SST	68	3252	2	2	TSeries-01292020-1041-010	opto alone control	1	500	46	0
Scn1a-SST	68	3252	2	2	TSeries-01292020-1041-010	opto alone control	1	500	47	0
Scn1a-SST	68	3252	2	2	TSeries-01292020-1041-010	opto alone control	1	500	48	0
Scn1a-SST	68	3252	2	2	TSeries-01292020-1041-010	opto alone control	1	500	49	0
Scn1a-SST	68	3252	2	2	TSeries-01292020-1041-010	opto alone control	1	500	50	0
Scn1a-SST	68	3252	2	2	TSeries-01292020-1041-010	opto alone control	1	500	51	0
Scn1a-SST	68	3252	2	2	TSeries-01292020-1041-010	opto alone control	1	500	52	0
Scn1a-SST	68	3252	2	2	TSeries-01292020-1041-010	opto alone control	1	500	53	0
Scn1a-SST	68	3252	2	2	TSeries-01292020-1041-010	opto alone control	1	500	54	0
Scn1a-SST	68	3252	2	2	TSeries-01292020-1041-010	opto alone control	1	500	55	0
Scn1a-SST	68	3252	2	2	TSeries-01292020-1041-010	opto alone control	1	500	56	0
Scn1a-SST	68	3252	2	2	TSeries-01292020-1041-010	opto alone control	1	500	57	0
Scn1a-SST	68	3252	2	2	TSeries-01292020-1041-010	opto alone control	1	500	58	0
Scn1a-SST	68	3252	2	2	TSeries-01292020-1041-010	opto alone control	1	500	59	0
Scn1a-SST	68	3252	2	2	TSeries-01292020-1041-010	opto alone control	1	500	60	0
Scn1a-SST	68	3252	2	2	TSeries-01292020-1041-010	opto alone control	1	500	61	0
Scn1a-SST	68	3252	2	2	TSeries-01292020-1041-010	opto alone control	1	500	62	0
Scn1a-SST	68	3252	2	2	TSeries-01292020-1041-010	opto alone control	1	500	63	0
Scn1a-SST	68	3252	2	2	TSeries-01292020-1041-010	opto alone control	1	500	64	0
Scn1a-SST	68	3252	2	2	TSeries-01292020-1041-010	opto alone control	1	500	65	0
Scn1a-SST	68	3252	2	2	TSeries-01292020-1041-010	opto alone control	1	500	66	0
Scn1a-SST	68	3252	2	2	TSeries-01292020-1041-010	opto alone control	1	500	67	0
Scn1a-SST	68	3252	2	2	TSeries-01292020-1041-010	opto alone control	1	500	68	0
Scn1a-SST	68	3252	2	2	TSeries-01292020-1041-010	opto alone control	1	500	69	0
Scn1a-SST	68	3252	2	2	TSeries-01292020-1041-010	opto alone control	1	500	70	0
Scn1a-SST	68	3252	2	2	TSeries-01292020-1041-010	opto alone control	1	500	71	0
Scn1a-SST	68	3252	2	2	TSeries-01292020-1041-010	opto alone control	1	500	72	0
Scn1a-SST	68	3252	2	2	TSeries-01292020-1041-011	electrical + opto	1	500	0	0
Scn1a-SST	68	3252	2	2	TSeries-01292020-1041-011	electrical + opto	1	500	1	0
Scn1a-SST	68	3252	2	2	TSeries-01292020-1041-011	electrical + opto	1	500	2	0
Scn1a-SST	68	3252	2	2	TSeries-01292020-1041-011	electrical + opto	1	500	3	0
Scn1a-SST	68	3252	2	2	TSeries-01292020-1041-011	electrical + opto	1	500	4	0
Scn1a-SST	68	3252	2	2	TSeries-01292020-1041-011	electrical + opto	1	500	5	0
Scn1a-SST	68	3252	2	2	TSeries-01292020-1041-011	electrical + opto	1	500	6	0
Scn1a-SST	68	3252	2	2	TSeries-01292020-1041-011	electrical + opto	1	500	7	0
Scn1a-SST	68	3252	2	2	TSeries-01292020-1041-011	electrical + opto	1	500	8	0
Scn1a-SST	68	3252	2	2	TSeries-01292020-1041-011	electrical + opto	1	500	9	0
Scn1a-SST	68	3252	2	2	TSeries-01292020-1041-011	electrical + opto	1	500	10	0
Scn1a-SST	68	3252	2	2	TSeries-01292020-1041-011	electrical + opto	1	500	11	0
Scn1a-SST	68	3252	2	2	TSeries-01292020-1041-011	electrical + opto	1	500	12	0
Scn1a-SST	68	3252	2	2	TSeries-01292020-1041-011	electrical + opto	1	500	13	0
Scn1a-SST	68	3252	2	2	TSeries-01292020-1041-011	electrical + opto	1	500	14	0
Scn1a-SST	68	3252	2	2	TSeries-01292020-1041-011	electrical + opto	1	500	15	0
Scn1a-SST	68	3252	2	2	TSeries-01292020-1041-011	electrical + opto	1	500	16	0
Scn1a-SST	68	3252	2	2	TSeries-01292020-1041-011	electrical + opto	1	500	17	0
Scn1a-SST	68	3252	2	2	TSeries-01292020-1041-011	electrical + opto	1	500	18	0
Scn1a-SST	68	3252	2	2	TSeries-01292020-1041-011	electrical + opto	1	500	19	0
Scn1a-SST	68	3252	2	2	TSeries-01292020-1041-011	electrical + opto	1	500	20	0
Scn1a-SST	68	3252	2	2	TSeries-01292020-1041-011	electrical + opto	1	500	21	0
Scn1a-SST	68	3252	2	2	TSeries-01292020-1041-011	electrical + opto	1	500	22	0
Scn1a-SST	68	3252	2	2	TSeries-01292020-1041-011	electrical + opto	1	500	23	0
Scn1a-SST	68	3252	2	2	TSeries-01292020-1041-011	electrical + opto	1	500	24	0
Scn1a-SST	68	3252	2	2	TSeries-01292020-1041-011	electrical + opto	1	500	25	0
Scn1a-SST	68	3252	2	2	TSeries-01292020-1041-011	electrical + opto	1	500	26	0
Scn1a-SST	68	3252	2	2	TSeries-01292020-1041-011	electrical + opto	1	500	27	0
Scn1a-SST	68	3252	2	2	TSeries-01292020-1041-011	electrical + opto	1	500	28	0
Scn1a-SST	68	3252	2	2	TSeries-01292020-1041-011	electrical + opto	1	500	29	0
Scn1a-SST	68	3252	2	2	TSeries-01292020-1041-011	electrical + opto	1	500	30	0
Scn1a-SST	68	3252	2	2	TSeries-01292020-1041-011	electrical + opto	1	500	31	1	0.328196
Scn1a-SST	68	3252	2	2	TSeries-01292020-1041-011	electrical + opto	1	500	32	0
Scn1a-SST	68	3252	2	2	TSeries-01292020-1041-011	electrical + opto	1	500	33	0
Scn1a-SST	68	3252	2	2	TSeries-01292020-1041-011	electrical + opto	1	500	34	0
Scn1a-SST	68	3252	2	2	TSeries-01292020-1041-011	electrical + opto	1	500	35	0
Scn1a-SST	68	3252	2	2	TSeries-01292020-1041-011	electrical + opto	1	500	36	0
Scn1a-SST	68	3252	2	2	TSeries-01292020-1041-011	electrical + opto	1	500	37	0
Scn1a-SST	68	3252	2	2	TSeries-01292020-1041-011	electrical + opto	1	500	38	0
Scn1a-SST	68	3252	2	2	TSeries-01292020-1041-011	electrical + opto	1	500	39	0
Scn1a-SST	68	3252	2	2	TSeries-01292020-1041-011	electrical + opto	1	500	40	0
Scn1a-SST	68	3252	2	2	TSeries-01292020-1041-011	electrical + opto	1	500	41	0
Scn1a-SST	68	3252	2	2	TSeries-01292020-1041-011	electrical + opto	1	500	42	0
Scn1a-SST	68	3252	2	2	TSeries-01292020-1041-011	electrical + opto	1	500	43	0
Scn1a-SST	68	3252	2	2	TSeries-01292020-1041-011	electrical + opto	1	500	44	0
Scn1a-SST	68	3252	2	2	TSeries-01292020-1041-011	electrical + opto	1	500	45	0
Scn1a-SST	68	3252	2	2	TSeries-01292020-1041-011	electrical + opto	1	500	46	0
Scn1a-SST	68	3252	2	2	TSeries-01292020-1041-011	electrical + opto	1	500	47	0
Scn1a-SST	68	3252	2	2	TSeries-01292020-1041-011	electrical + opto	1	500	48	0
Scn1a-SST	68	3252	2	2	TSeries-01292020-1041-011	electrical + opto	1	500	49	0
Scn1a-SST	68	3252	2	2	TSeries-01292020-1041-011	electrical + opto	1	500	50	0
Scn1a-SST	68	3252	2	2	TSeries-01292020-1041-011	electrical + opto	1	500	51	0
Scn1a-SST	68	3252	2	2	TSeries-01292020-1041-011	electrical + opto	1	500	52	0
Scn1a-SST	68	3252	2	2	TSeries-01292020-1041-011	electrical + opto	1	500	53	0
Scn1a-SST	68	3252	2	2	TSeries-01292020-1041-011	electrical + opto	1	500	54	0
Scn1a-SST	68	3252	2	2	TSeries-01292020-1041-011	electrical + opto	1	500	55	0
Scn1a-SST	68	3252	2	2	TSeries-01292020-1041-011	electrical + opto	1	500	56	0
Scn1a-SST	68	3252	2	2	TSeries-01292020-1041-011	electrical + opto	1	500	57	0
Scn1a-SST	68	3252	2	2	TSeries-01292020-1041-011	electrical + opto	1	500	58	0
Scn1a-SST	68	3252	2	2	TSeries-01292020-1041-011	electrical + opto	1	500	59	0
Scn1a-SST	68	3252	2	2	TSeries-01292020-1041-011	electrical + opto	1	500	60	0
Scn1a-SST	68	3252	2	2	TSeries-01292020-1041-011	electrical + opto	1	500	61	1	1.16589
Scn1a-SST	68	3252	2	2	TSeries-01292020-1041-011	electrical + opto	1	500	62	0
Scn1a-SST	68	3252	2	2	TSeries-01292020-1041-011	electrical + opto	1	500	63	0
Scn1a-SST	68	3252	2	2	TSeries-01292020-1041-011	electrical + opto	1	500	64	0
Scn1a-SST	68	3252	2	2	TSeries-01292020-1041-011	electrical + opto	1	500	65	1	0.449249
Scn1a-SST	68	3252	2	2	TSeries-01292020-1041-011	electrical + opto	1	500	66	0
Scn1a-SST	68	3252	2	2	TSeries-01292020-1041-011	electrical + opto	1	500	67	0
Scn1a-SST	68	3252	2	2	TSeries-01292020-1041-011	electrical + opto	1	500	68	0
Scn1a-SST	68	3252	2	2	TSeries-01292020-1041-011	electrical + opto	1	500	69	0
Scn1a-SST	68	3252	2	2	TSeries-01292020-1041-011	electrical + opto	1	500	70	0
Scn1a-SST	68	3252	2	2	TSeries-01292020-1041-011	electrical + opto	1	500	71	0
Scn1a-SST	68	3252	2	2	TSeries-01292020-1041-011	electrical + opto	1	500	72	0
Scn1a-SST	68	3252	2	3	TSeries-01292020-1041-017	electrical	1	500	0	0
Scn1a-SST	68	3252	2	3	TSeries-01292020-1041-017	electrical	1	500	1	1	0.492624
Scn1a-SST	68	3252	2	3	TSeries-01292020-1041-017	electrical	1	500	2	0
Scn1a-SST	68	3252	2	3	TSeries-01292020-1041-017	electrical	1	500	3	0
Scn1a-SST	68	3252	2	3	TSeries-01292020-1041-017	electrical	1	500	4	0
Scn1a-SST	68	3252	2	3	TSeries-01292020-1041-017	electrical	1	500	5	0
Scn1a-SST	68	3252	2	3	TSeries-01292020-1041-017	electrical	1	500	6	0
Scn1a-SST	68	3252	2	3	TSeries-01292020-1041-017	electrical	1	500	7	0
Scn1a-SST	68	3252	2	3	TSeries-01292020-1041-017	electrical	1	500	8	0
Scn1a-SST	68	3252	2	3	TSeries-01292020-1041-017	electrical	1	500	9	0
Scn1a-SST	68	3252	2	3	TSeries-01292020-1041-017	electrical	1	500	10	0
Scn1a-SST	68	3252	2	3	TSeries-01292020-1041-017	electrical	1	500	11	0
Scn1a-SST	68	3252	2	3	TSeries-01292020-1041-017	electrical	1	500	12	0
Scn1a-SST	68	3252	2	3	TSeries-01292020-1041-017	electrical	1	500	13	0
Scn1a-SST	68	3252	2	3	TSeries-01292020-1041-017	electrical	1	500	14	1	0.197577
Scn1a-SST	68	3252	2	3	TSeries-01292020-1041-017	electrical	1	500	15	0
Scn1a-SST	68	3252	2	3	TSeries-01292020-1041-017	electrical	1	500	16	1	0.145986
Scn1a-SST	68	3252	2	3	TSeries-01292020-1041-017	electrical	1	500	17	1	0.312792
Scn1a-SST	68	3252	2	3	TSeries-01292020-1041-017	electrical	1	500	18	0
Scn1a-SST	68	3252	2	3	TSeries-01292020-1041-017	electrical	1	500	19	0
Scn1a-SST	68	3252	2	3	TSeries-01292020-1041-017	electrical	1	500	20	1	0.964355
Scn1a-SST	68	3252	2	3	TSeries-01292020-1041-017	electrical	1	500	21	0
Scn1a-SST	68	3252	2	3	TSeries-01292020-1041-017	electrical	1	500	22	0
Scn1a-SST	68	3252	2	3	TSeries-01292020-1041-017	electrical	1	500	23	0
Scn1a-SST	68	3252	2	3	TSeries-01292020-1041-017	electrical	1	500	24	1	0.162172
Scn1a-SST	68	3252	2	3	TSeries-01292020-1041-017	electrical	1	500	25	0
Scn1a-SST	68	3252	2	3	TSeries-01292020-1041-017	electrical	1	500	26	1	0.347315
Scn1a-SST	68	3252	2	3	TSeries-01292020-1041-017	electrical	1	500	27	0
Scn1a-SST	68	3252	2	3	TSeries-01292020-1041-017	electrical	1	500	28	0
Scn1a-SST	68	3252	2	3	TSeries-01292020-1041-017	electrical	1	500	29	1	0.200434
Scn1a-SST	68	3252	2	3	TSeries-01292020-1041-017	electrical	1	500	30	1	0.444006
Scn1a-SST	68	3252	2	3	TSeries-01292020-1041-017	electrical	1	500	31	0
Scn1a-SST	68	3252	2	3	TSeries-01292020-1041-017	electrical	1	500	32	0
Scn1a-SST	68	3252	2	3	TSeries-01292020-1041-017	electrical	1	500	33	0
Scn1a-SST	68	3252	2	3	TSeries-01292020-1041-017	electrical	1	500	34	0
Scn1a-SST	68	3252	2	3	TSeries-01292020-1041-017	electrical	1	500	35	1	0.15053
Scn1a-SST	68	3252	2	3	TSeries-01292020-1041-017	electrical	1	500	36	0
Scn1a-SST	68	3252	2	3	TSeries-01292020-1041-017	electrical	1	500	37	0
Scn1a-SST	68	3252	2	3	TSeries-01292020-1041-017	electrical	1	500	38	0
Scn1a-SST	68	3252	2	3	TSeries-01292020-1041-017	electrical	1	500	39	0
Scn1a-SST	68	3252	2	3	TSeries-01292020-1041-017	electrical	1	500	40	0
Scn1a-SST	68	3252	2	3	TSeries-01292020-1041-017	electrical	1	500	41	1	0.334999
Scn1a-SST	68	3252	2	3	TSeries-01292020-1041-017	electrical	1	500	42	1	0.189169
Scn1a-SST	68	3252	2	3	TSeries-01292020-1041-017	electrical	1	500	43	1	0.348066
Scn1a-SST	68	3252	2	3	TSeries-01292020-1041-017	electrical	1	500	44	1	0.159867
Scn1a-SST	68	3252	2	3	TSeries-01292020-1041-017	electrical	1	500	45	0
Scn1a-SST	68	3252	2	3	TSeries-01292020-1041-017	electrical	1	500	46	1	0.275536
Scn1a-SST	68	3252	2	3	TSeries-01292020-1041-017	electrical	1	500	47	0
Scn1a-SST	68	3252	2	3	TSeries-01292020-1041-017	electrical	1	500	48	0
Scn1a-SST	68	3252	2	3	TSeries-01292020-1041-017	electrical	1	500	49	0
Scn1a-SST	68	3252	2	3	TSeries-01292020-1041-017	electrical	1	500	50	0
Scn1a-SST	68	3252	2	3	TSeries-01292020-1041-017	electrical	1	500	51	0
Scn1a-SST	68	3252	2	3	TSeries-01292020-1041-017	electrical	1	500	52	0
Scn1a-SST	68	3252	2	3	TSeries-01292020-1041-017	electrical	1	500	53	0
Scn1a-SST	68	3252	2	3	TSeries-01292020-1041-017	electrical	1	500	54	0
Scn1a-SST	68	3252	2	3	TSeries-01292020-1041-017	electrical	1	500	55	0
Scn1a-SST	68	3252	2	3	TSeries-01292020-1041-017	electrical	1	500	56	0
Scn1a-SST	68	3252	2	3	TSeries-01292020-1041-017	electrical	1	500	57	0
Scn1a-SST	68	3252	2	3	TSeries-01292020-1041-017	electrical	1	500	58	0
Scn1a-SST	68	3252	2	3	TSeries-01292020-1041-017	electrical	1	500	59	1	0.311958
Scn1a-SST	68	3252	2	3	TSeries-01292020-1041-017	electrical	1	500	60	1	0.53709
Scn1a-SST	68	3252	2	3	TSeries-01292020-1041-017	electrical	1	500	61	0
Scn1a-SST	68	3252	2	3	TSeries-01292020-1041-017	electrical	1	500	62	0
Scn1a-SST	68	3252	2	3	TSeries-01292020-1041-017	electrical	1	500	63	0
Scn1a-SST	68	3252	2	3	TSeries-01292020-1041-017	electrical	1	500	64	0
Scn1a-SST	68	3252	2	3	TSeries-01292020-1041-017	electrical	1	500	65	0
Scn1a-SST	68	3252	2	3	TSeries-01292020-1041-017	electrical	1	500	66	0
Scn1a-SST	68	3252	2	3	TSeries-01292020-1041-017	electrical	1	500	67	0
Scn1a-SST	68	3252	2	3	TSeries-01292020-1041-017	electrical	1	500	68	0
Scn1a-SST	68	3252	2	3	TSeries-01292020-1041-017	electrical	1	500	69	0
Scn1a-SST	68	3252	2	3	TSeries-01292020-1041-017	electrical	1	500	70	0
Scn1a-SST	68	3252	2	3	TSeries-01292020-1041-017	electrical	1	500	71	0
Scn1a-SST	68	3252	2	3	TSeries-01292020-1041-017	electrical	1	500	72	1	0.223334
Scn1a-SST	68	3252	2	3	TSeries-01292020-1041-017	electrical	1	500	73	0
Scn1a-SST	68	3252	2	3	TSeries-01292020-1041-017	electrical	1	500	74	0
Scn1a-SST	68	3252	2	3	TSeries-01292020-1041-017	electrical	1	500	75	1	0.204838
Scn1a-SST	68	3252	2	3	TSeries-01292020-1041-017	electrical	1	500	76	0
Scn1a-SST	68	3252	2	3	TSeries-01292020-1041-017	electrical	1	500	77	0
Scn1a-SST	68	3252	2	3	TSeries-01292020-1041-017	electrical	1	500	78	1	0.24134
Scn1a-SST	68	3252	2	3	TSeries-01292020-1041-017	electrical	1	500	79	0
Scn1a-SST	68	3252	2	3	TSeries-01292020-1041-017	electrical	1	500	80	1	1.19148
Scn1a-SST	68	3252	2	3	TSeries-01292020-1041-017	electrical	1	500	81	0
Scn1a-SST	68	3252	2	3	TSeries-01292020-1041-017	electrical	1	500	82	1	0.301974
Scn1a-SST	68	3252	2	3	TSeries-01292020-1041-017	electrical	1	500	83	1	0.309256
Scn1a-SST	68	3252	2	3	TSeries-01292020-1041-017	electrical	1	500	84	1	1.77556
Scn1a-SST	68	3252	2	3	TSeries-01292020-1041-017	electrical	1	500	85	1	0.2963
Scn1a-SST	68	3252	2	3	TSeries-01292020-1041-017	electrical	1	500	86	0
Scn1a-SST	68	3252	2	3	TSeries-01292020-1041-017	electrical	1	500	87	1	0.380722
Scn1a-SST	68	3252	2	3	TSeries-01292020-1041-017	electrical	1	500	88	0
Scn1a-SST	68	3252	2	3	TSeries-01292020-1041-017	electrical	1	500	89	1	0.521687
Scn1a-SST	68	3252	2	3	TSeries-01292020-1041-017	electrical	1	500	90	1	0.243601
Scn1a-SST	68	3252	2	3	TSeries-01292020-1041-018	opto alone control	1	500	0	0
Scn1a-SST	68	3252	2	3	TSeries-01292020-1041-018	opto alone control	1	500	1	0
Scn1a-SST	68	3252	2	3	TSeries-01292020-1041-018	opto alone control	1	500	2	0
Scn1a-SST	68	3252	2	3	TSeries-01292020-1041-018	opto alone control	1	500	3	0
Scn1a-SST	68	3252	2	3	TSeries-01292020-1041-018	opto alone control	1	500	4	0
Scn1a-SST	68	3252	2	3	TSeries-01292020-1041-018	opto alone control	1	500	5	0
Scn1a-SST	68	3252	2	3	TSeries-01292020-1041-018	opto alone control	1	500	6	0
Scn1a-SST	68	3252	2	3	TSeries-01292020-1041-018	opto alone control	1	500	7	0
Scn1a-SST	68	3252	2	3	TSeries-01292020-1041-018	opto alone control	1	500	8	0
Scn1a-SST	68	3252	2	3	TSeries-01292020-1041-018	opto alone control	1	500	9	0
Scn1a-SST	68	3252	2	3	TSeries-01292020-1041-018	opto alone control	1	500	10	0
Scn1a-SST	68	3252	2	3	TSeries-01292020-1041-018	opto alone control	1	500	11	0
Scn1a-SST	68	3252	2	3	TSeries-01292020-1041-018	opto alone control	1	500	12	0
Scn1a-SST	68	3252	2	3	TSeries-01292020-1041-018	opto alone control	1	500	13	0
Scn1a-SST	68	3252	2	3	TSeries-01292020-1041-018	opto alone control	1	500	14	0
Scn1a-SST	68	3252	2	3	TSeries-01292020-1041-018	opto alone control	1	500	15	0
Scn1a-SST	68	3252	2	3	TSeries-01292020-1041-018	opto alone control	1	500	16	0
Scn1a-SST	68	3252	2	3	TSeries-01292020-1041-018	opto alone control	1	500	17	0
Scn1a-SST	68	3252	2	3	TSeries-01292020-1041-018	opto alone control	1	500	18	0
Scn1a-SST	68	3252	2	3	TSeries-01292020-1041-018	opto alone control	1	500	19	0
Scn1a-SST	68	3252	2	3	TSeries-01292020-1041-018	opto alone control	1	500	20	0
Scn1a-SST	68	3252	2	3	TSeries-01292020-1041-018	opto alone control	1	500	21	0
Scn1a-SST	68	3252	2	3	TSeries-01292020-1041-018	opto alone control	1	500	22	0
Scn1a-SST	68	3252	2	3	TSeries-01292020-1041-018	opto alone control	1	500	23	0
Scn1a-SST	68	3252	2	3	TSeries-01292020-1041-018	opto alone control	1	500	24	0
Scn1a-SST	68	3252	2	3	TSeries-01292020-1041-018	opto alone control	1	500	25	0
Scn1a-SST	68	3252	2	3	TSeries-01292020-1041-018	opto alone control	1	500	26	0
Scn1a-SST	68	3252	2	3	TSeries-01292020-1041-018	opto alone control	1	500	27	0
Scn1a-SST	68	3252	2	3	TSeries-01292020-1041-018	opto alone control	1	500	28	0
Scn1a-SST	68	3252	2	3	TSeries-01292020-1041-018	opto alone control	1	500	29	0
Scn1a-SST	68	3252	2	3	TSeries-01292020-1041-018	opto alone control	1	500	30	0
Scn1a-SST	68	3252	2	3	TSeries-01292020-1041-018	opto alone control	1	500	31	0
Scn1a-SST	68	3252	2	3	TSeries-01292020-1041-018	opto alone control	1	500	32	0
Scn1a-SST	68	3252	2	3	TSeries-01292020-1041-018	opto alone control	1	500	33	0
Scn1a-SST	68	3252	2	3	TSeries-01292020-1041-018	opto alone control	1	500	34	0
Scn1a-SST	68	3252	2	3	TSeries-01292020-1041-018	opto alone control	1	500	35	0
Scn1a-SST	68	3252	2	3	TSeries-01292020-1041-018	opto alone control	1	500	36	0
Scn1a-SST	68	3252	2	3	TSeries-01292020-1041-018	opto alone control	1	500	37	0
Scn1a-SST	68	3252	2	3	TSeries-01292020-1041-018	opto alone control	1	500	38	0
Scn1a-SST	68	3252	2	3	TSeries-01292020-1041-018	opto alone control	1	500	39	0
Scn1a-SST	68	3252	2	3	TSeries-01292020-1041-018	opto alone control	1	500	40	0
Scn1a-SST	68	3252	2	3	TSeries-01292020-1041-018	opto alone control	1	500	41	0
Scn1a-SST	68	3252	2	3	TSeries-01292020-1041-018	opto alone control	1	500	42	0
Scn1a-SST	68	3252	2	3	TSeries-01292020-1041-018	opto alone control	1	500	43	0
Scn1a-SST	68	3252	2	3	TSeries-01292020-1041-018	opto alone control	1	500	44	0
Scn1a-SST	68	3252	2	3	TSeries-01292020-1041-018	opto alone control	1	500	45	0
Scn1a-SST	68	3252	2	3	TSeries-01292020-1041-018	opto alone control	1	500	46	0
Scn1a-SST	68	3252	2	3	TSeries-01292020-1041-018	opto alone control	1	500	47	0
Scn1a-SST	68	3252	2	3	TSeries-01292020-1041-018	opto alone control	1	500	48	0
Scn1a-SST	68	3252	2	3	TSeries-01292020-1041-018	opto alone control	1	500	49	0
Scn1a-SST	68	3252	2	3	TSeries-01292020-1041-018	opto alone control	1	500	50	0
Scn1a-SST	68	3252	2	3	TSeries-01292020-1041-018	opto alone control	1	500	51	0
Scn1a-SST	68	3252	2	3	TSeries-01292020-1041-018	opto alone control	1	500	52	0
Scn1a-SST	68	3252	2	3	TSeries-01292020-1041-018	opto alone control	1	500	53	0
Scn1a-SST	68	3252	2	3	TSeries-01292020-1041-018	opto alone control	1	500	54	0
Scn1a-SST	68	3252	2	3	TSeries-01292020-1041-018	opto alone control	1	500	55	0
Scn1a-SST	68	3252	2	3	TSeries-01292020-1041-018	opto alone control	1	500	56	0
Scn1a-SST	68	3252	2	3	TSeries-01292020-1041-018	opto alone control	1	500	57	0
Scn1a-SST	68	3252	2	3	TSeries-01292020-1041-018	opto alone control	1	500	58	0
Scn1a-SST	68	3252	2	3	TSeries-01292020-1041-018	opto alone control	1	500	59	0
Scn1a-SST	68	3252	2	3	TSeries-01292020-1041-018	opto alone control	1	500	60	0
Scn1a-SST	68	3252	2	3	TSeries-01292020-1041-018	opto alone control	1	500	61	0
Scn1a-SST	68	3252	2	3	TSeries-01292020-1041-018	opto alone control	1	500	62	0
Scn1a-SST	68	3252	2	3	TSeries-01292020-1041-018	opto alone control	1	500	63	0
Scn1a-SST	68	3252	2	3	TSeries-01292020-1041-018	opto alone control	1	500	64	0
Scn1a-SST	68	3252	2	3	TSeries-01292020-1041-018	opto alone control	1	500	65	0
Scn1a-SST	68	3252	2	3	TSeries-01292020-1041-018	opto alone control	1	500	66	0
Scn1a-SST	68	3252	2	3	TSeries-01292020-1041-018	opto alone control	1	500	67	0
Scn1a-SST	68	3252	2	3	TSeries-01292020-1041-018	opto alone control	1	500	68	0
Scn1a-SST	68	3252	2	3	TSeries-01292020-1041-018	opto alone control	1	500	69	0
Scn1a-SST	68	3252	2	3	TSeries-01292020-1041-018	opto alone control	1	500	70	0
Scn1a-SST	68	3252	2	3	TSeries-01292020-1041-018	opto alone control	1	500	71	0
Scn1a-SST	68	3252	2	3	TSeries-01292020-1041-018	opto alone control	1	500	72	0
Scn1a-SST	68	3252	2	3	TSeries-01292020-1041-018	opto alone control	1	500	73	0
Scn1a-SST	68	3252	2	3	TSeries-01292020-1041-018	opto alone control	1	500	74	0
Scn1a-SST	68	3252	2	3	TSeries-01292020-1041-018	opto alone control	1	500	75	0
Scn1a-SST	68	3252	2	3	TSeries-01292020-1041-018	opto alone control	1	500	76	0
Scn1a-SST	68	3252	2	3	TSeries-01292020-1041-018	opto alone control	1	500	77	0
Scn1a-SST	68	3252	2	3	TSeries-01292020-1041-018	opto alone control	1	500	78	0
Scn1a-SST	68	3252	2	3	TSeries-01292020-1041-018	opto alone control	1	500	79	0
Scn1a-SST	68	3252	2	3	TSeries-01292020-1041-018	opto alone control	1	500	80	0
Scn1a-SST	68	3252	2	3	TSeries-01292020-1041-018	opto alone control	1	500	81	0
Scn1a-SST	68	3252	2	3	TSeries-01292020-1041-018	opto alone control	1	500	82	0
Scn1a-SST	68	3252	2	3	TSeries-01292020-1041-018	opto alone control	1	500	83	0
Scn1a-SST	68	3252	2	3	TSeries-01292020-1041-018	opto alone control	1	500	84	0
Scn1a-SST	68	3252	2	3	TSeries-01292020-1041-018	opto alone control	1	500	85	0
Scn1a-SST	68	3252	2	3	TSeries-01292020-1041-018	opto alone control	1	500	86	0
Scn1a-SST	68	3252	2	3	TSeries-01292020-1041-018	opto alone control	1	500	87	0
Scn1a-SST	68	3252	2	3	TSeries-01292020-1041-018	opto alone control	1	500	88	0
Scn1a-SST	68	3252	2	3	TSeries-01292020-1041-018	opto alone control	1	500	89	0
Scn1a-SST	68	3252	2	3	TSeries-01292020-1041-018	opto alone control	1	500	90	0
Scn1a-SST	68	3252	2	3	TSeries-01292020-1041-020	electrical + opto	1	500	0	0
Scn1a-SST	68	3252	2	3	TSeries-01292020-1041-020	electrical + opto	1	500	1	1	0.531097
Scn1a-SST	68	3252	2	3	TSeries-01292020-1041-020	electrical + opto	1	500	2	0
Scn1a-SST	68	3252	2	3	TSeries-01292020-1041-020	electrical + opto	1	500	3	0
Scn1a-SST	68	3252	2	3	TSeries-01292020-1041-020	electrical + opto	1	500	4	0
Scn1a-SST	68	3252	2	3	TSeries-01292020-1041-020	electrical + opto	1	500	5	0
Scn1a-SST	68	3252	2	3	TSeries-01292020-1041-020	electrical + opto	1	500	6	0
Scn1a-SST	68	3252	2	3	TSeries-01292020-1041-020	electrical + opto	1	500	7	0
Scn1a-SST	68	3252	2	3	TSeries-01292020-1041-020	electrical + opto	1	500	8	0
Scn1a-SST	68	3252	2	3	TSeries-01292020-1041-020	electrical + opto	1	500	9	0
Scn1a-SST	68	3252	2	3	TSeries-01292020-1041-020	electrical + opto	1	500	10	0
Scn1a-SST	68	3252	2	3	TSeries-01292020-1041-020	electrical + opto	1	500	11	0
Scn1a-SST	68	3252	2	3	TSeries-01292020-1041-020	electrical + opto	1	500	12	0
Scn1a-SST	68	3252	2	3	TSeries-01292020-1041-020	electrical + opto	1	500	13	0
Scn1a-SST	68	3252	2	3	TSeries-01292020-1041-020	electrical + opto	1	500	14	0
Scn1a-SST	68	3252	2	3	TSeries-01292020-1041-020	electrical + opto	1	500	15	0
Scn1a-SST	68	3252	2	3	TSeries-01292020-1041-020	electrical + opto	1	500	16	0
Scn1a-SST	68	3252	2	3	TSeries-01292020-1041-020	electrical + opto	1	500	17	1	0.386763
Scn1a-SST	68	3252	2	3	TSeries-01292020-1041-020	electrical + opto	1	500	18	0
Scn1a-SST	68	3252	2	3	TSeries-01292020-1041-020	electrical + opto	1	500	19	0
Scn1a-SST	68	3252	2	3	TSeries-01292020-1041-020	electrical + opto	1	500	20	0
Scn1a-SST	68	3252	2	3	TSeries-01292020-1041-020	electrical + opto	1	500	21	1	0.184255
Scn1a-SST	68	3252	2	3	TSeries-01292020-1041-020	electrical + opto	1	500	22	0
Scn1a-SST	68	3252	2	3	TSeries-01292020-1041-020	electrical + opto	1	500	23	0
Scn1a-SST	68	3252	2	3	TSeries-01292020-1041-020	electrical + opto	1	500	24	0
Scn1a-SST	68	3252	2	3	TSeries-01292020-1041-020	electrical + opto	1	500	25	0
Scn1a-SST	68	3252	2	3	TSeries-01292020-1041-020	electrical + opto	1	500	26	1	0.244457
Scn1a-SST	68	3252	2	3	TSeries-01292020-1041-020	electrical + opto	1	500	27	0
Scn1a-SST	68	3252	2	3	TSeries-01292020-1041-020	electrical + opto	1	500	28	0
Scn1a-SST	68	3252	2	3	TSeries-01292020-1041-020	electrical + opto	1	500	29	0
Scn1a-SST	68	3252	2	3	TSeries-01292020-1041-020	electrical + opto	1	500	30	0
Scn1a-SST	68	3252	2	3	TSeries-01292020-1041-020	electrical + opto	1	500	31	0
Scn1a-SST	68	3252	2	3	TSeries-01292020-1041-020	electrical + opto	1	500	32	0
Scn1a-SST	68	3252	2	3	TSeries-01292020-1041-020	electrical + opto	1	500	33	0
Scn1a-SST	68	3252	2	3	TSeries-01292020-1041-020	electrical + opto	1	500	34	0
Scn1a-SST	68	3252	2	3	TSeries-01292020-1041-020	electrical + opto	1	500	35	0
Scn1a-SST	68	3252	2	3	TSeries-01292020-1041-020	electrical + opto	1	500	36	0
Scn1a-SST	68	3252	2	3	TSeries-01292020-1041-020	electrical + opto	1	500	37	0
Scn1a-SST	68	3252	2	3	TSeries-01292020-1041-020	electrical + opto	1	500	38	0
Scn1a-SST	68	3252	2	3	TSeries-01292020-1041-020	electrical + opto	1	500	39	0
Scn1a-SST	68	3252	2	3	TSeries-01292020-1041-020	electrical + opto	1	500	40	0
Scn1a-SST	68	3252	2	3	TSeries-01292020-1041-020	electrical + opto	1	500	41	0
Scn1a-SST	68	3252	2	3	TSeries-01292020-1041-020	electrical + opto	1	500	42	0
Scn1a-SST	68	3252	2	3	TSeries-01292020-1041-020	electrical + opto	1	500	43	0
Scn1a-SST	68	3252	2	3	TSeries-01292020-1041-020	electrical + opto	1	500	44	0
Scn1a-SST	68	3252	2	3	TSeries-01292020-1041-020	electrical + opto	1	500	45	0
Scn1a-SST	68	3252	2	3	TSeries-01292020-1041-020	electrical + opto	1	500	46	0
Scn1a-SST	68	3252	2	3	TSeries-01292020-1041-020	electrical + opto	1	500	47	0
Scn1a-SST	68	3252	2	3	TSeries-01292020-1041-020	electrical + opto	1	500	48	0
Scn1a-SST	68	3252	2	3	TSeries-01292020-1041-020	electrical + opto	1	500	49	0
Scn1a-SST	68	3252	2	3	TSeries-01292020-1041-020	electrical + opto	1	500	50	0
Scn1a-SST	68	3252	2	3	TSeries-01292020-1041-020	electrical + opto	1	500	51	0
Scn1a-SST	68	3252	2	3	TSeries-01292020-1041-020	electrical + opto	1	500	52	0
Scn1a-SST	68	3252	2	3	TSeries-01292020-1041-020	electrical + opto	1	500	53	0
Scn1a-SST	68	3252	2	3	TSeries-01292020-1041-020	electrical + opto	1	500	54	0
Scn1a-SST	68	3252	2	3	TSeries-01292020-1041-020	electrical + opto	1	500	55	1	0.236113
Scn1a-SST	68	3252	2	3	TSeries-01292020-1041-020	electrical + opto	1	500	56	0
Scn1a-SST	68	3252	2	3	TSeries-01292020-1041-020	electrical + opto	1	500	57	0
Scn1a-SST	68	3252	2	3	TSeries-01292020-1041-020	electrical + opto	1	500	58	0
Scn1a-SST	68	3252	2	3	TSeries-01292020-1041-020	electrical + opto	1	500	59	1	0.307708
Scn1a-SST	68	3252	2	3	TSeries-01292020-1041-020	electrical + opto	1	500	60	0
Scn1a-SST	68	3252	2	3	TSeries-01292020-1041-020	electrical + opto	1	500	61	0
Scn1a-SST	68	3252	2	3	TSeries-01292020-1041-020	electrical + opto	1	500	62	0
Scn1a-SST	68	3252	2	3	TSeries-01292020-1041-020	electrical + opto	1	500	63	0
Scn1a-SST	68	3252	2	3	TSeries-01292020-1041-020	electrical + opto	1	500	64	0
Scn1a-SST	68	3252	2	3	TSeries-01292020-1041-020	electrical + opto	1	500	65	0
Scn1a-SST	68	3252	2	3	TSeries-01292020-1041-020	electrical + opto	1	500	66	0
Scn1a-SST	68	3252	2	3	TSeries-01292020-1041-020	electrical + opto	1	500	67	0
Scn1a-SST	68	3252	2	3	TSeries-01292020-1041-020	electrical + opto	1	500	68	0
Scn1a-SST	68	3252	2	3	TSeries-01292020-1041-020	electrical + opto	1	500	69	0
Scn1a-SST	68	3252	2	3	TSeries-01292020-1041-020	electrical + opto	1	500	70	0
Scn1a-SST	68	3252	2	3	TSeries-01292020-1041-020	electrical + opto	1	500	71	0
Scn1a-SST	68	3252	2	3	TSeries-01292020-1041-020	electrical + opto	1	500	72	0
Scn1a-SST	68	3252	2	3	TSeries-01292020-1041-020	electrical + opto	1	500	73	0
Scn1a-SST	68	3252	2	3	TSeries-01292020-1041-020	electrical + opto	1	500	74	0
Scn1a-SST	68	3252	2	3	TSeries-01292020-1041-020	electrical + opto	1	500	75	0
Scn1a-SST	68	3252	2	3	TSeries-01292020-1041-020	electrical + opto	1	500	76	0
Scn1a-SST	68	3252	2	3	TSeries-01292020-1041-020	electrical + opto	1	500	77	0
Scn1a-SST	68	3252	2	3	TSeries-01292020-1041-020	electrical + opto	1	500	78	0
Scn1a-SST	68	3252	2	3	TSeries-01292020-1041-020	electrical + opto	1	500	79	0
Scn1a-SST	68	3252	2	3	TSeries-01292020-1041-020	electrical + opto	1	500	80	1	0.430552
Scn1a-SST	68	3252	2	3	TSeries-01292020-1041-020	electrical + opto	1	500	81	0
Scn1a-SST	68	3252	2	3	TSeries-01292020-1041-020	electrical + opto	1	500	82	0
Scn1a-SST	68	3252	2	3	TSeries-01292020-1041-020	electrical + opto	1	500	83	0
Scn1a-SST	68	3252	2	3	TSeries-01292020-1041-020	electrical + opto	1	500	84	0
Scn1a-SST	68	3252	2	3	TSeries-01292020-1041-020	electrical + opto	1	500	85	0
Scn1a-SST	68	3252	2	3	TSeries-01292020-1041-020	electrical + opto	1	500	86	0
Scn1a-SST	68	3252	2	3	TSeries-01292020-1041-020	electrical + opto	1	500	87	0
Scn1a-SST	68	3252	2	3	TSeries-01292020-1041-020	electrical + opto	1	500	88	0
Scn1a-SST	68	3252	2	3	TSeries-01292020-1041-020	electrical + opto	1	500	89	0
Scn1a-SST	68	3252	2	3	TSeries-01292020-1041-020	electrical + opto	1	500	90	0
Scn1a-SST	68	3252	2	4	TSeries-01292020-1041-025	electrical	1	500	0	0
Scn1a-SST	68	3252	2	4	TSeries-01292020-1041-025	electrical	1	500	1	0
Scn1a-SST	68	3252	2	4	TSeries-01292020-1041-025	electrical	1	500	2	0
Scn1a-SST	68	3252	2	4	TSeries-01292020-1041-025	electrical	1	500	3	0
Scn1a-SST	68	3252	2	4	TSeries-01292020-1041-025	electrical	1	500	4	0
Scn1a-SST	68	3252	2	4	TSeries-01292020-1041-025	electrical	1	500	5	0
Scn1a-SST	68	3252	2	4	TSeries-01292020-1041-025	electrical	1	500	6	0
Scn1a-SST	68	3252	2	4	TSeries-01292020-1041-025	electrical	1	500	7	0
Scn1a-SST	68	3252	2	4	TSeries-01292020-1041-025	electrical	1	500	8	0
Scn1a-SST	68	3252	2	4	TSeries-01292020-1041-025	electrical	1	500	9	0
Scn1a-SST	68	3252	2	4	TSeries-01292020-1041-025	electrical	1	500	10	0
Scn1a-SST	68	3252	2	4	TSeries-01292020-1041-025	electrical	1	500	11	1	0.503525
Scn1a-SST	68	3252	2	4	TSeries-01292020-1041-025	electrical	1	500	12	1	0.142226
Scn1a-SST	68	3252	2	4	TSeries-01292020-1041-025	electrical	1	500	13	0
Scn1a-SST	68	3252	2	4	TSeries-01292020-1041-025	electrical	1	500	14	0
Scn1a-SST	68	3252	2	4	TSeries-01292020-1041-025	electrical	1	500	15	0
Scn1a-SST	68	3252	2	4	TSeries-01292020-1041-025	electrical	1	500	16	0
Scn1a-SST	68	3252	2	4	TSeries-01292020-1041-025	electrical	1	500	17	0
Scn1a-SST	68	3252	2	4	TSeries-01292020-1041-025	electrical	1	500	18	0
Scn1a-SST	68	3252	2	4	TSeries-01292020-1041-025	electrical	1	500	19	1	0.298633
Scn1a-SST	68	3252	2	4	TSeries-01292020-1041-025	electrical	1	500	20	0
Scn1a-SST	68	3252	2	4	TSeries-01292020-1041-025	electrical	1	500	21	0
Scn1a-SST	68	3252	2	4	TSeries-01292020-1041-025	electrical	1	500	22	0
Scn1a-SST	68	3252	2	4	TSeries-01292020-1041-025	electrical	1	500	23	1	0.177877
Scn1a-SST	68	3252	2	4	TSeries-01292020-1041-025	electrical	1	500	24	0
Scn1a-SST	68	3252	2	4	TSeries-01292020-1041-025	electrical	1	500	25	0
Scn1a-SST	68	3252	2	4	TSeries-01292020-1041-025	electrical	1	500	26	1	0.139659
Scn1a-SST	68	3252	2	4	TSeries-01292020-1041-025	electrical	1	500	27	0
Scn1a-SST	68	3252	2	4	TSeries-01292020-1041-025	electrical	1	500	28	1	0.596912
Scn1a-SST	68	3252	2	4	TSeries-01292020-1041-025	electrical	1	500	29	1	0.383145
Scn1a-SST	68	3252	2	4	TSeries-01292020-1041-025	electrical	1	500	30	0
Scn1a-SST	68	3252	2	4	TSeries-01292020-1041-025	electrical	1	500	31	0
Scn1a-SST	68	3252	2	4	TSeries-01292020-1041-025	electrical	1	500	32	1	0.296879
Scn1a-SST	68	3252	2	4	TSeries-01292020-1041-025	electrical	1	500	33	0
Scn1a-SST	68	3252	2	4	TSeries-01292020-1041-025	electrical	1	500	34	0
Scn1a-SST	68	3252	2	4	TSeries-01292020-1041-025	electrical	1	500	35	0
Scn1a-SST	68	3252	2	4	TSeries-01292020-1041-025	electrical	1	500	36	0
Scn1a-SST	68	3252	2	4	TSeries-01292020-1041-025	electrical	1	500	37	0
Scn1a-SST	68	3252	2	4	TSeries-01292020-1041-025	electrical	1	500	38	0
Scn1a-SST	68	3252	2	4	TSeries-01292020-1041-025	electrical	1	500	39	0
Scn1a-SST	68	3252	2	4	TSeries-01292020-1041-025	electrical	1	500	40	0
Scn1a-SST	68	3252	2	4	TSeries-01292020-1041-025	electrical	1	500	41	0
Scn1a-SST	68	3252	2	4	TSeries-01292020-1041-025	electrical	1	500	42	1	0.235866
Scn1a-SST	68	3252	2	4	TSeries-01292020-1041-025	electrical	1	500	43	1	0.564517
Scn1a-SST	68	3252	2	4	TSeries-01292020-1041-025	electrical	1	500	44	1	0.496314
Scn1a-SST	68	3252	2	4	TSeries-01292020-1041-025	electrical	1	500	45	1	0.193078
Scn1a-SST	68	3252	2	4	TSeries-01292020-1041-025	electrical	1	500	46	1	0.14463
Scn1a-SST	68	3252	2	4	TSeries-01292020-1041-025	electrical	1	500	47	1	0.440982
Scn1a-SST	68	3252	2	4	TSeries-01292020-1041-025	electrical	1	500	48	1	0.156878
Scn1a-SST	68	3252	2	4	TSeries-01292020-1041-025	electrical	1	500	49	0
Scn1a-SST	68	3252	2	4	TSeries-01292020-1041-025	electrical	1	500	50	0
Scn1a-SST	68	3252	2	4	TSeries-01292020-1041-025	electrical	1	500	51	0
Scn1a-SST	68	3252	2	4	TSeries-01292020-1041-025	electrical	1	500	52	1	0.19552
Scn1a-SST	68	3252	2	4	TSeries-01292020-1041-025	electrical	1	500	53	0
Scn1a-SST	68	3252	2	4	TSeries-01292020-1041-025	electrical	1	500	54	1	1.26906
Scn1a-SST	68	3252	2	4	TSeries-01292020-1041-025	electrical	1	500	55	1	0.204573
Scn1a-SST	68	3252	2	4	TSeries-01292020-1041-025	electrical	1	500	56	1	0.14907
Scn1a-SST	68	3252	2	4	TSeries-01292020-1041-025	electrical	1	500	57	0
Scn1a-SST	68	3252	2	4	TSeries-01292020-1041-025	electrical	1	500	58	1	0.236342
Scn1a-SST	68	3252	2	4	TSeries-01292020-1041-025	electrical	1	500	59	0
Scn1a-SST	68	3252	2	4	TSeries-01292020-1041-025	electrical	1	500	60	1	0.20688
Scn1a-SST	68	3252	2	4	TSeries-01292020-1041-025	electrical	1	500	61	0
Scn1a-SST	68	3252	2	4	TSeries-01292020-1041-025	electrical	1	500	62	0
Scn1a-SST	68	3252	2	4	TSeries-01292020-1041-025	electrical	1	500	63	1	0.277064
Scn1a-SST	68	3252	2	4	TSeries-01292020-1041-025	electrical	1	500	64	1	2.38528
Scn1a-SST	68	3252	2	4	TSeries-01292020-1041-025	electrical	1	500	65	1	0.517818
Scn1a-SST	68	3252	2	4	TSeries-01292020-1041-025	electrical	1	500	66	1	0.349007
Scn1a-SST	68	3252	2	4	TSeries-01292020-1041-025	electrical	1	500	67	1	0.855242
Scn1a-SST	68	3252	2	4	TSeries-01292020-1041-025	electrical	1	500	68	1	0.413521
Scn1a-SST	68	3252	2	4	TSeries-01292020-1041-025	electrical	1	500	69	0
Scn1a-SST	68	3252	2	4	TSeries-01292020-1041-025	electrical	1	500	70	1	0.423036
Scn1a-SST	68	3252	2	4	TSeries-01292020-1041-025	electrical	1	500	71	1	0.399708
Scn1a-SST	68	3252	2	4	TSeries-01292020-1041-025	electrical	1	500	72	1	0.596111
Scn1a-SST	68	3252	2	4	TSeries-01292020-1041-025	electrical	1	500	73	1	1.98186
Scn1a-SST	68	3252	2	4	TSeries-01292020-1041-025	electrical	1	500	74	1	0.382406
Scn1a-SST	68	3252	2	4	TSeries-01292020-1041-025	electrical	1	500	75	1	0.281442
Scn1a-SST	68	3252	2	4	TSeries-01292020-1041-025	electrical	1	500	76	1	2.38761
Scn1a-SST	68	3252	2	4	TSeries-01292020-1041-025	electrical	1	500	77	1	0.423219
Scn1a-SST	68	3252	2	4	TSeries-01292020-1041-025	electrical	1	500	78	1	0.203475
Scn1a-SST	68	3252	2	4	TSeries-01292020-1041-025	electrical	1	500	79	1	2.45435
Scn1a-SST	68	3252	2	4	TSeries-01292020-1041-026	opto alone control	1	500	0	0
Scn1a-SST	68	3252	2	4	TSeries-01292020-1041-026	opto alone control	1	500	1	0
Scn1a-SST	68	3252	2	4	TSeries-01292020-1041-026	opto alone control	1	500	2	0
Scn1a-SST	68	3252	2	4	TSeries-01292020-1041-026	opto alone control	1	500	3	0
Scn1a-SST	68	3252	2	4	TSeries-01292020-1041-026	opto alone control	1	500	4	0
Scn1a-SST	68	3252	2	4	TSeries-01292020-1041-026	opto alone control	1	500	5	0
Scn1a-SST	68	3252	2	4	TSeries-01292020-1041-026	opto alone control	1	500	6	0
Scn1a-SST	68	3252	2	4	TSeries-01292020-1041-026	opto alone control	1	500	7	0
Scn1a-SST	68	3252	2	4	TSeries-01292020-1041-026	opto alone control	1	500	8	0
Scn1a-SST	68	3252	2	4	TSeries-01292020-1041-026	opto alone control	1	500	9	0
Scn1a-SST	68	3252	2	4	TSeries-01292020-1041-026	opto alone control	1	500	10	0
Scn1a-SST	68	3252	2	4	TSeries-01292020-1041-026	opto alone control	1	500	11	0
Scn1a-SST	68	3252	2	4	TSeries-01292020-1041-026	opto alone control	1	500	12	0
Scn1a-SST	68	3252	2	4	TSeries-01292020-1041-026	opto alone control	1	500	13	0
Scn1a-SST	68	3252	2	4	TSeries-01292020-1041-026	opto alone control	1	500	14	0
Scn1a-SST	68	3252	2	4	TSeries-01292020-1041-026	opto alone control	1	500	15	0
Scn1a-SST	68	3252	2	4	TSeries-01292020-1041-026	opto alone control	1	500	16	0
Scn1a-SST	68	3252	2	4	TSeries-01292020-1041-026	opto alone control	1	500	17	0
Scn1a-SST	68	3252	2	4	TSeries-01292020-1041-026	opto alone control	1	500	18	0
Scn1a-SST	68	3252	2	4	TSeries-01292020-1041-026	opto alone control	1	500	19	0
Scn1a-SST	68	3252	2	4	TSeries-01292020-1041-026	opto alone control	1	500	20	0
Scn1a-SST	68	3252	2	4	TSeries-01292020-1041-026	opto alone control	1	500	21	0
Scn1a-SST	68	3252	2	4	TSeries-01292020-1041-026	opto alone control	1	500	22	0
Scn1a-SST	68	3252	2	4	TSeries-01292020-1041-026	opto alone control	1	500	23	0
Scn1a-SST	68	3252	2	4	TSeries-01292020-1041-026	opto alone control	1	500	24	0
Scn1a-SST	68	3252	2	4	TSeries-01292020-1041-026	opto alone control	1	500	25	0
Scn1a-SST	68	3252	2	4	TSeries-01292020-1041-026	opto alone control	1	500	26	0
Scn1a-SST	68	3252	2	4	TSeries-01292020-1041-026	opto alone control	1	500	27	0
Scn1a-SST	68	3252	2	4	TSeries-01292020-1041-026	opto alone control	1	500	28	0
Scn1a-SST	68	3252	2	4	TSeries-01292020-1041-026	opto alone control	1	500	29	0
Scn1a-SST	68	3252	2	4	TSeries-01292020-1041-026	opto alone control	1	500	30	0
Scn1a-SST	68	3252	2	4	TSeries-01292020-1041-026	opto alone control	1	500	31	0
Scn1a-SST	68	3252	2	4	TSeries-01292020-1041-026	opto alone control	1	500	32	0
Scn1a-SST	68	3252	2	4	TSeries-01292020-1041-026	opto alone control	1	500	33	0
Scn1a-SST	68	3252	2	4	TSeries-01292020-1041-026	opto alone control	1	500	34	0
Scn1a-SST	68	3252	2	4	TSeries-01292020-1041-026	opto alone control	1	500	35	0
Scn1a-SST	68	3252	2	4	TSeries-01292020-1041-026	opto alone control	1	500	36	0
Scn1a-SST	68	3252	2	4	TSeries-01292020-1041-026	opto alone control	1	500	37	0
Scn1a-SST	68	3252	2	4	TSeries-01292020-1041-026	opto alone control	1	500	38	0
Scn1a-SST	68	3252	2	4	TSeries-01292020-1041-026	opto alone control	1	500	39	0
Scn1a-SST	68	3252	2	4	TSeries-01292020-1041-026	opto alone control	1	500	40	0
Scn1a-SST	68	3252	2	4	TSeries-01292020-1041-026	opto alone control	1	500	41	0
Scn1a-SST	68	3252	2	4	TSeries-01292020-1041-026	opto alone control	1	500	42	0
Scn1a-SST	68	3252	2	4	TSeries-01292020-1041-026	opto alone control	1	500	43	0
Scn1a-SST	68	3252	2	4	TSeries-01292020-1041-026	opto alone control	1	500	44	0
Scn1a-SST	68	3252	2	4	TSeries-01292020-1041-026	opto alone control	1	500	45	0
Scn1a-SST	68	3252	2	4	TSeries-01292020-1041-026	opto alone control	1	500	46	0
Scn1a-SST	68	3252	2	4	TSeries-01292020-1041-026	opto alone control	1	500	47	0
Scn1a-SST	68	3252	2	4	TSeries-01292020-1041-026	opto alone control	1	500	48	0
Scn1a-SST	68	3252	2	4	TSeries-01292020-1041-026	opto alone control	1	500	49	0
Scn1a-SST	68	3252	2	4	TSeries-01292020-1041-026	opto alone control	1	500	50	0
Scn1a-SST	68	3252	2	4	TSeries-01292020-1041-026	opto alone control	1	500	51	0
Scn1a-SST	68	3252	2	4	TSeries-01292020-1041-026	opto alone control	1	500	52	0
Scn1a-SST	68	3252	2	4	TSeries-01292020-1041-026	opto alone control	1	500	53	0
Scn1a-SST	68	3252	2	4	TSeries-01292020-1041-026	opto alone control	1	500	54	0
Scn1a-SST	68	3252	2	4	TSeries-01292020-1041-026	opto alone control	1	500	55	0
Scn1a-SST	68	3252	2	4	TSeries-01292020-1041-026	opto alone control	1	500	56	0
Scn1a-SST	68	3252	2	4	TSeries-01292020-1041-026	opto alone control	1	500	57	0
Scn1a-SST	68	3252	2	4	TSeries-01292020-1041-026	opto alone control	1	500	58	0
Scn1a-SST	68	3252	2	4	TSeries-01292020-1041-026	opto alone control	1	500	59	0
Scn1a-SST	68	3252	2	4	TSeries-01292020-1041-026	opto alone control	1	500	60	0
Scn1a-SST	68	3252	2	4	TSeries-01292020-1041-026	opto alone control	1	500	61	0
Scn1a-SST	68	3252	2	4	TSeries-01292020-1041-026	opto alone control	1	500	62	0
Scn1a-SST	68	3252	2	4	TSeries-01292020-1041-026	opto alone control	1	500	63	0
Scn1a-SST	68	3252	2	4	TSeries-01292020-1041-026	opto alone control	1	500	64	0
Scn1a-SST	68	3252	2	4	TSeries-01292020-1041-026	opto alone control	1	500	65	0
Scn1a-SST	68	3252	2	4	TSeries-01292020-1041-026	opto alone control	1	500	66	0
Scn1a-SST	68	3252	2	4	TSeries-01292020-1041-026	opto alone control	1	500	67	0
Scn1a-SST	68	3252	2	4	TSeries-01292020-1041-026	opto alone control	1	500	68	0
Scn1a-SST	68	3252	2	4	TSeries-01292020-1041-026	opto alone control	1	500	69	0
Scn1a-SST	68	3252	2	4	TSeries-01292020-1041-026	opto alone control	1	500	70	0
Scn1a-SST	68	3252	2	4	TSeries-01292020-1041-026	opto alone control	1	500	71	0
Scn1a-SST	68	3252	2	4	TSeries-01292020-1041-026	opto alone control	1	500	72	0
Scn1a-SST	68	3252	2	4	TSeries-01292020-1041-026	opto alone control	1	500	73	0
Scn1a-SST	68	3252	2	4	TSeries-01292020-1041-026	opto alone control	1	500	74	0
Scn1a-SST	68	3252	2	4	TSeries-01292020-1041-026	opto alone control	1	500	75	0
Scn1a-SST	68	3252	2	4	TSeries-01292020-1041-026	opto alone control	1	500	76	0
Scn1a-SST	68	3252	2	4	TSeries-01292020-1041-026	opto alone control	1	500	77	0
Scn1a-SST	68	3252	2	4	TSeries-01292020-1041-026	opto alone control	1	500	78	0
Scn1a-SST	68	3252	2	4	TSeries-01292020-1041-026	opto alone control	1	500	79	0
Scn1a-SST	68	3252	2	4	TSeries-01292020-1041-028	electrical + opto	1	500	0	0
Scn1a-SST	68	3252	2	4	TSeries-01292020-1041-028	electrical + opto	1	500	1	1	0.0756747
Scn1a-SST	68	3252	2	4	TSeries-01292020-1041-028	electrical + opto	1	500	2	1	0.101725
Scn1a-SST	68	3252	2	4	TSeries-01292020-1041-028	electrical + opto	1	500	3	0
Scn1a-SST	68	3252	2	4	TSeries-01292020-1041-028	electrical + opto	1	500	4	0
Scn1a-SST	68	3252	2	4	TSeries-01292020-1041-028	electrical + opto	1	500	5	1	0.145485
Scn1a-SST	68	3252	2	4	TSeries-01292020-1041-028	electrical + opto	1	500	6	1	0.177809
Scn1a-SST	68	3252	2	4	TSeries-01292020-1041-028	electrical + opto	1	500	7	0
Scn1a-SST	68	3252	2	4	TSeries-01292020-1041-028	electrical + opto	1	500	8	0
Scn1a-SST	68	3252	2	4	TSeries-01292020-1041-028	electrical + opto	1	500	9	0
Scn1a-SST	68	3252	2	4	TSeries-01292020-1041-028	electrical + opto	1	500	10	0
Scn1a-SST	68	3252	2	4	TSeries-01292020-1041-028	electrical + opto	1	500	11	1	0.524271
Scn1a-SST	68	3252	2	4	TSeries-01292020-1041-028	electrical + opto	1	500	12	0
Scn1a-SST	68	3252	2	4	TSeries-01292020-1041-028	electrical + opto	1	500	13	0
Scn1a-SST	68	3252	2	4	TSeries-01292020-1041-028	electrical + opto	1	500	14	0
Scn1a-SST	68	3252	2	4	TSeries-01292020-1041-028	electrical + opto	1	500	15	0
Scn1a-SST	68	3252	2	4	TSeries-01292020-1041-028	electrical + opto	1	500	16	0
Scn1a-SST	68	3252	2	4	TSeries-01292020-1041-028	electrical + opto	1	500	17	0
Scn1a-SST	68	3252	2	4	TSeries-01292020-1041-028	electrical + opto	1	500	18	0
Scn1a-SST	68	3252	2	4	TSeries-01292020-1041-028	electrical + opto	1	500	19	1	0.357632
Scn1a-SST	68	3252	2	4	TSeries-01292020-1041-028	electrical + opto	1	500	20	0
Scn1a-SST	68	3252	2	4	TSeries-01292020-1041-028	electrical + opto	1	500	21	0
Scn1a-SST	68	3252	2	4	TSeries-01292020-1041-028	electrical + opto	1	500	22	0
Scn1a-SST	68	3252	2	4	TSeries-01292020-1041-028	electrical + opto	1	500	23	0
Scn1a-SST	68	3252	2	4	TSeries-01292020-1041-028	electrical + opto	1	500	24	0
Scn1a-SST	68	3252	2	4	TSeries-01292020-1041-028	electrical + opto	1	500	25	0
Scn1a-SST	68	3252	2	4	TSeries-01292020-1041-028	electrical + opto	1	500	26	0
Scn1a-SST	68	3252	2	4	TSeries-01292020-1041-028	electrical + opto	1	500	27	0
Scn1a-SST	68	3252	2	4	TSeries-01292020-1041-028	electrical + opto	1	500	28	0
Scn1a-SST	68	3252	2	4	TSeries-01292020-1041-028	electrical + opto	1	500	29	0
Scn1a-SST	68	3252	2	4	TSeries-01292020-1041-028	electrical + opto	1	500	30	0
Scn1a-SST	68	3252	2	4	TSeries-01292020-1041-028	electrical + opto	1	500	31	0
Scn1a-SST	68	3252	2	4	TSeries-01292020-1041-028	electrical + opto	1	500	32	0
Scn1a-SST	68	3252	2	4	TSeries-01292020-1041-028	electrical + opto	1	500	33	0
Scn1a-SST	68	3252	2	4	TSeries-01292020-1041-028	electrical + opto	1	500	34	0
Scn1a-SST	68	3252	2	4	TSeries-01292020-1041-028	electrical + opto	1	500	35	0
Scn1a-SST	68	3252	2	4	TSeries-01292020-1041-028	electrical + opto	1	500	36	0
Scn1a-SST	68	3252	2	4	TSeries-01292020-1041-028	electrical + opto	1	500	37	0
Scn1a-SST	68	3252	2	4	TSeries-01292020-1041-028	electrical + opto	1	500	38	1	0.215694
Scn1a-SST	68	3252	2	4	TSeries-01292020-1041-028	electrical + opto	1	500	39	0
Scn1a-SST	68	3252	2	4	TSeries-01292020-1041-028	electrical + opto	1	500	40	0
Scn1a-SST	68	3252	2	4	TSeries-01292020-1041-028	electrical + opto	1	500	41	0
Scn1a-SST	68	3252	2	4	TSeries-01292020-1041-028	electrical + opto	1	500	42	0
Scn1a-SST	68	3252	2	4	TSeries-01292020-1041-028	electrical + opto	1	500	43	0
Scn1a-SST	68	3252	2	4	TSeries-01292020-1041-028	electrical + opto	1	500	44	0
Scn1a-SST	68	3252	2	4	TSeries-01292020-1041-028	electrical + opto	1	500	45	0
Scn1a-SST	68	3252	2	4	TSeries-01292020-1041-028	electrical + opto	1	500	46	0
Scn1a-SST	68	3252	2	4	TSeries-01292020-1041-028	electrical + opto	1	500	47	1	0.0891086
Scn1a-SST	68	3252	2	4	TSeries-01292020-1041-028	electrical + opto	1	500	48	0
Scn1a-SST	68	3252	2	4	TSeries-01292020-1041-028	electrical + opto	1	500	49	0
Scn1a-SST	68	3252	2	4	TSeries-01292020-1041-028	electrical + opto	1	500	50	0
Scn1a-SST	68	3252	2	4	TSeries-01292020-1041-028	electrical + opto	1	500	51	0
Scn1a-SST	68	3252	2	4	TSeries-01292020-1041-028	electrical + opto	1	500	52	0
Scn1a-SST	68	3252	2	4	TSeries-01292020-1041-028	electrical + opto	1	500	53	0
Scn1a-SST	68	3252	2	4	TSeries-01292020-1041-028	electrical + opto	1	500	54	0
Scn1a-SST	68	3252	2	4	TSeries-01292020-1041-028	electrical + opto	1	500	55	0
Scn1a-SST	68	3252	2	4	TSeries-01292020-1041-028	electrical + opto	1	500	56	0
Scn1a-SST	68	3252	2	4	TSeries-01292020-1041-028	electrical + opto	1	500	57	0
Scn1a-SST	68	3252	2	4	TSeries-01292020-1041-028	electrical + opto	1	500	58	0
Scn1a-SST	68	3252	2	4	TSeries-01292020-1041-028	electrical + opto	1	500	59	0
Scn1a-SST	68	3252	2	4	TSeries-01292020-1041-028	electrical + opto	1	500	60	0
Scn1a-SST	68	3252	2	4	TSeries-01292020-1041-028	electrical + opto	1	500	61	0
Scn1a-SST	68	3252	2	4	TSeries-01292020-1041-028	electrical + opto	1	500	62	0
Scn1a-SST	68	3252	2	4	TSeries-01292020-1041-028	electrical + opto	1	500	63	0
Scn1a-SST	68	3252	2	4	TSeries-01292020-1041-028	electrical + opto	1	500	64	1	0.236407
Scn1a-SST	68	3252	2	4	TSeries-01292020-1041-028	electrical + opto	1	500	65	0
Scn1a-SST	68	3252	2	4	TSeries-01292020-1041-028	electrical + opto	1	500	66	0
Scn1a-SST	68	3252	2	4	TSeries-01292020-1041-028	electrical + opto	1	500	67	1	0.244628
Scn1a-SST	68	3252	2	4	TSeries-01292020-1041-028	electrical + opto	1	500	68	0
Scn1a-SST	68	3252	2	4	TSeries-01292020-1041-028	electrical + opto	1	500	69	0
Scn1a-SST	68	3252	2	4	TSeries-01292020-1041-028	electrical + opto	1	500	70	0
Scn1a-SST	68	3252	2	4	TSeries-01292020-1041-028	electrical + opto	1	500	71	0
Scn1a-SST	68	3252	2	4	TSeries-01292020-1041-028	electrical + opto	1	500	72	0
Scn1a-SST	68	3252	2	4	TSeries-01292020-1041-028	electrical + opto	1	500	73	0
Scn1a-SST	68	3252	2	4	TSeries-01292020-1041-028	electrical + opto	1	500	74	0
Scn1a-SST	68	3252	2	4	TSeries-01292020-1041-028	electrical + opto	1	500	75	0
Scn1a-SST	68	3252	2	4	TSeries-01292020-1041-028	electrical + opto	1	500	76	0
Scn1a-SST	68	3252	2	4	TSeries-01292020-1041-028	electrical + opto	1	500	77	0
Scn1a-SST	68	3252	2	4	TSeries-01292020-1041-028	electrical + opto	1	500	78	0
Scn1a-SST	68	3252	2	4	TSeries-01292020-1041-028	electrical + opto	1	500	79	1	0.155752
Scn1a-SST	68	3252	3	6	TSeries-01292020-1041-034	electrical	1	500	0	0
Scn1a-SST	68	3252	3	6	TSeries-01292020-1041-034	electrical	1	500	1	0
Scn1a-SST	68	3252	3	6	TSeries-01292020-1041-034	electrical	1	500	2	1	0.176653
Scn1a-SST	68	3252	3	6	TSeries-01292020-1041-034	electrical	1	500	3	0
Scn1a-SST	68	3252	3	6	TSeries-01292020-1041-034	electrical	1	500	4	0
Scn1a-SST	68	3252	3	6	TSeries-01292020-1041-034	electrical	1	500	5	0
Scn1a-SST	68	3252	3	6	TSeries-01292020-1041-034	electrical	1	500	6	0
Scn1a-SST	68	3252	3	6	TSeries-01292020-1041-034	electrical	1	500	7	0
Scn1a-SST	68	3252	3	6	TSeries-01292020-1041-034	electrical	1	500	8	0
Scn1a-SST	68	3252	3	6	TSeries-01292020-1041-034	electrical	1	500	9	0
Scn1a-SST	68	3252	3	6	TSeries-01292020-1041-034	electrical	1	500	10	0
Scn1a-SST	68	3252	3	6	TSeries-01292020-1041-034	electrical	1	500	11	0
Scn1a-SST	68	3252	3	6	TSeries-01292020-1041-034	electrical	1	500	12	0
Scn1a-SST	68	3252	3	6	TSeries-01292020-1041-034	electrical	1	500	13	0
Scn1a-SST	68	3252	3	6	TSeries-01292020-1041-034	electrical	1	500	14	0
Scn1a-SST	68	3252	3	6	TSeries-01292020-1041-034	electrical	1	500	15	0
Scn1a-SST	68	3252	3	6	TSeries-01292020-1041-034	electrical	1	500	16	0
Scn1a-SST	68	3252	3	6	TSeries-01292020-1041-034	electrical	1	500	17	0
Scn1a-SST	68	3252	3	6	TSeries-01292020-1041-034	electrical	1	500	18	0
Scn1a-SST	68	3252	3	6	TSeries-01292020-1041-034	electrical	1	500	19	1	0.266
Scn1a-SST	68	3252	3	6	TSeries-01292020-1041-034	electrical	1	500	20	1	0.497128
Scn1a-SST	68	3252	3	6	TSeries-01292020-1041-034	electrical	1	500	21	1	0.850781
Scn1a-SST	68	3252	3	6	TSeries-01292020-1041-034	electrical	1	500	22	0
Scn1a-SST	68	3252	3	6	TSeries-01292020-1041-034	electrical	1	500	23	0
Scn1a-SST	68	3252	3	6	TSeries-01292020-1041-034	electrical	1	500	24	0
Scn1a-SST	68	3252	3	6	TSeries-01292020-1041-034	electrical	1	500	25	0
Scn1a-SST	68	3252	3	6	TSeries-01292020-1041-034	electrical	1	500	26	0
Scn1a-SST	68	3252	3	6	TSeries-01292020-1041-034	electrical	1	500	27	0
Scn1a-SST	68	3252	3	6	TSeries-01292020-1041-034	electrical	1	500	28	1	0.305602
Scn1a-SST	68	3252	3	6	TSeries-01292020-1041-034	electrical	1	500	29	0
Scn1a-SST	68	3252	3	6	TSeries-01292020-1041-034	electrical	1	500	30	0
Scn1a-SST	68	3252	3	6	TSeries-01292020-1041-034	electrical	1	500	31	0
Scn1a-SST	68	3252	3	6	TSeries-01292020-1041-034	electrical	1	500	32	0
Scn1a-SST	68	3252	3	6	TSeries-01292020-1041-034	electrical	1	500	33	0
Scn1a-SST	68	3252	3	6	TSeries-01292020-1041-034	electrical	1	500	34	1	0.334775
Scn1a-SST	68	3252	3	6	TSeries-01292020-1041-034	electrical	1	500	35	1	0.363748
Scn1a-SST	68	3252	3	6	TSeries-01292020-1041-034	electrical	1	500	36	0
Scn1a-SST	68	3252	3	6	TSeries-01292020-1041-034	electrical	1	500	37	0
Scn1a-SST	68	3252	3	6	TSeries-01292020-1041-034	electrical	1	500	38	0
Scn1a-SST	68	3252	3	6	TSeries-01292020-1041-034	electrical	1	500	39	1	2.03838
Scn1a-SST	68	3252	3	6	TSeries-01292020-1041-034	electrical	1	500	40	0
Scn1a-SST	68	3252	3	6	TSeries-01292020-1041-034	electrical	1	500	41	0
Scn1a-SST	68	3252	3	6	TSeries-01292020-1041-034	electrical	1	500	42	0
Scn1a-SST	68	3252	3	6	TSeries-01292020-1041-034	electrical	1	500	43	0
Scn1a-SST	68	3252	3	6	TSeries-01292020-1041-034	electrical	1	500	44	0
Scn1a-SST	68	3252	3	6	TSeries-01292020-1041-034	electrical	1	500	45	1	2.28097
Scn1a-SST	68	3252	3	6	TSeries-01292020-1041-034	electrical	1	500	46	1	0.415951
Scn1a-SST	68	3252	3	6	TSeries-01292020-1041-034	electrical	1	500	47	0
Scn1a-SST	68	3252	3	6	TSeries-01292020-1041-034	electrical	1	500	48	1	0.23069
Scn1a-SST	68	3252	3	6	TSeries-01292020-1041-034	electrical	1	500	49	0
Scn1a-SST	68	3252	3	6	TSeries-01292020-1041-034	electrical	1	500	50	1	0.664681
Scn1a-SST	68	3252	3	6	TSeries-01292020-1041-034	electrical	1	500	51	1	2.27246
Scn1a-SST	68	3252	3	6	TSeries-01292020-1041-034	electrical	1	500	52	1	4.42907
Scn1a-SST	68	3252	3	6	TSeries-01292020-1041-034	electrical	1	500	53	1	0.432803
Scn1a-SST	68	3252	3	6	TSeries-01292020-1041-034	electrical	1	500	54	0
Scn1a-SST	68	3252	3	6	TSeries-01292020-1041-034	electrical	1	500	55	0
Scn1a-SST	68	3252	3	6	TSeries-01292020-1041-034	electrical	1	500	56	1	0.257675
Scn1a-SST	68	3252	3	6	TSeries-01292020-1041-034	electrical	1	500	57	0
Scn1a-SST	68	3252	3	6	TSeries-01292020-1041-034	electrical	1	500	58	0
Scn1a-SST	68	3252	3	6	TSeries-01292020-1041-034	electrical	1	500	59	1	0.280695
Scn1a-SST	68	3252	3	6	TSeries-01292020-1041-034	electrical	1	500	60	0
Scn1a-SST	68	3252	3	6	TSeries-01292020-1041-034	electrical	1	500	61	1	0.434553
Scn1a-SST	68	3252	3	6	TSeries-01292020-1041-034	electrical	1	500	62	1	0.895203
Scn1a-SST	68	3252	3	6	TSeries-01292020-1041-035	opto alone control	1	500	0	0
Scn1a-SST	68	3252	3	6	TSeries-01292020-1041-035	opto alone control	1	500	1	0
Scn1a-SST	68	3252	3	6	TSeries-01292020-1041-035	opto alone control	1	500	2	0
Scn1a-SST	68	3252	3	6	TSeries-01292020-1041-035	opto alone control	1	500	3	0
Scn1a-SST	68	3252	3	6	TSeries-01292020-1041-035	opto alone control	1	500	4	0
Scn1a-SST	68	3252	3	6	TSeries-01292020-1041-035	opto alone control	1	500	5	0
Scn1a-SST	68	3252	3	6	TSeries-01292020-1041-035	opto alone control	1	500	6	0
Scn1a-SST	68	3252	3	6	TSeries-01292020-1041-035	opto alone control	1	500	7	0
Scn1a-SST	68	3252	3	6	TSeries-01292020-1041-035	opto alone control	1	500	8	0
Scn1a-SST	68	3252	3	6	TSeries-01292020-1041-035	opto alone control	1	500	9	0
Scn1a-SST	68	3252	3	6	TSeries-01292020-1041-035	opto alone control	1	500	10	0
Scn1a-SST	68	3252	3	6	TSeries-01292020-1041-035	opto alone control	1	500	11	0
Scn1a-SST	68	3252	3	6	TSeries-01292020-1041-035	opto alone control	1	500	12	0
Scn1a-SST	68	3252	3	6	TSeries-01292020-1041-035	opto alone control	1	500	13	0
Scn1a-SST	68	3252	3	6	TSeries-01292020-1041-035	opto alone control	1	500	14	0
Scn1a-SST	68	3252	3	6	TSeries-01292020-1041-035	opto alone control	1	500	15	0
Scn1a-SST	68	3252	3	6	TSeries-01292020-1041-035	opto alone control	1	500	16	0
Scn1a-SST	68	3252	3	6	TSeries-01292020-1041-035	opto alone control	1	500	17	0
Scn1a-SST	68	3252	3	6	TSeries-01292020-1041-035	opto alone control	1	500	18	0
Scn1a-SST	68	3252	3	6	TSeries-01292020-1041-035	opto alone control	1	500	19	0
Scn1a-SST	68	3252	3	6	TSeries-01292020-1041-035	opto alone control	1	500	20	0
Scn1a-SST	68	3252	3	6	TSeries-01292020-1041-035	opto alone control	1	500	21	0
Scn1a-SST	68	3252	3	6	TSeries-01292020-1041-035	opto alone control	1	500	22	0
Scn1a-SST	68	3252	3	6	TSeries-01292020-1041-035	opto alone control	1	500	23	0
Scn1a-SST	68	3252	3	6	TSeries-01292020-1041-035	opto alone control	1	500	24	0
Scn1a-SST	68	3252	3	6	TSeries-01292020-1041-035	opto alone control	1	500	25	0
Scn1a-SST	68	3252	3	6	TSeries-01292020-1041-035	opto alone control	1	500	26	0
Scn1a-SST	68	3252	3	6	TSeries-01292020-1041-035	opto alone control	1	500	27	0
Scn1a-SST	68	3252	3	6	TSeries-01292020-1041-035	opto alone control	1	500	28	0
Scn1a-SST	68	3252	3	6	TSeries-01292020-1041-035	opto alone control	1	500	29	0
Scn1a-SST	68	3252	3	6	TSeries-01292020-1041-035	opto alone control	1	500	30	0
Scn1a-SST	68	3252	3	6	TSeries-01292020-1041-035	opto alone control	1	500	31	0
Scn1a-SST	68	3252	3	6	TSeries-01292020-1041-035	opto alone control	1	500	32	0
Scn1a-SST	68	3252	3	6	TSeries-01292020-1041-035	opto alone control	1	500	33	0
Scn1a-SST	68	3252	3	6	TSeries-01292020-1041-035	opto alone control	1	500	34	0
Scn1a-SST	68	3252	3	6	TSeries-01292020-1041-035	opto alone control	1	500	35	0
Scn1a-SST	68	3252	3	6	TSeries-01292020-1041-035	opto alone control	1	500	36	0
Scn1a-SST	68	3252	3	6	TSeries-01292020-1041-035	opto alone control	1	500	37	0
Scn1a-SST	68	3252	3	6	TSeries-01292020-1041-035	opto alone control	1	500	38	0
Scn1a-SST	68	3252	3	6	TSeries-01292020-1041-035	opto alone control	1	500	39	0
Scn1a-SST	68	3252	3	6	TSeries-01292020-1041-035	opto alone control	1	500	40	0
Scn1a-SST	68	3252	3	6	TSeries-01292020-1041-035	opto alone control	1	500	41	0
Scn1a-SST	68	3252	3	6	TSeries-01292020-1041-035	opto alone control	1	500	42	0
Scn1a-SST	68	3252	3	6	TSeries-01292020-1041-035	opto alone control	1	500	43	0
Scn1a-SST	68	3252	3	6	TSeries-01292020-1041-035	opto alone control	1	500	44	0
Scn1a-SST	68	3252	3	6	TSeries-01292020-1041-035	opto alone control	1	500	45	0
Scn1a-SST	68	3252	3	6	TSeries-01292020-1041-035	opto alone control	1	500	46	0
Scn1a-SST	68	3252	3	6	TSeries-01292020-1041-035	opto alone control	1	500	47	0
Scn1a-SST	68	3252	3	6	TSeries-01292020-1041-035	opto alone control	1	500	48	0
Scn1a-SST	68	3252	3	6	TSeries-01292020-1041-035	opto alone control	1	500	49	0
Scn1a-SST	68	3252	3	6	TSeries-01292020-1041-035	opto alone control	1	500	50	0
Scn1a-SST	68	3252	3	6	TSeries-01292020-1041-035	opto alone control	1	500	51	0
Scn1a-SST	68	3252	3	6	TSeries-01292020-1041-035	opto alone control	1	500	52	0
Scn1a-SST	68	3252	3	6	TSeries-01292020-1041-035	opto alone control	1	500	53	0
Scn1a-SST	68	3252	3	6	TSeries-01292020-1041-035	opto alone control	1	500	54	0
Scn1a-SST	68	3252	3	6	TSeries-01292020-1041-035	opto alone control	1	500	55	0
Scn1a-SST	68	3252	3	6	TSeries-01292020-1041-035	opto alone control	1	500	56	0
Scn1a-SST	68	3252	3	6	TSeries-01292020-1041-035	opto alone control	1	500	57	0
Scn1a-SST	68	3252	3	6	TSeries-01292020-1041-035	opto alone control	1	500	58	0
Scn1a-SST	68	3252	3	6	TSeries-01292020-1041-035	opto alone control	1	500	59	0
Scn1a-SST	68	3252	3	6	TSeries-01292020-1041-035	opto alone control	1	500	60	0
Scn1a-SST	68	3252	3	6	TSeries-01292020-1041-035	opto alone control	1	500	61	0
Scn1a-SST	68	3252	3	6	TSeries-01292020-1041-035	opto alone control	1	500	62	0
Scn1a-SST	68	3252	3	6	TSeries-01292020-1041-039	electrical + opto	1	500	0	0
Scn1a-SST	68	3252	3	6	TSeries-01292020-1041-039	electrical + opto	1	500	1	0
Scn1a-SST	68	3252	3	6	TSeries-01292020-1041-039	electrical + opto	1	500	2	0
Scn1a-SST	68	3252	3	6	TSeries-01292020-1041-039	electrical + opto	1	500	3	0
Scn1a-SST	68	3252	3	6	TSeries-01292020-1041-039	electrical + opto	1	500	4	0
Scn1a-SST	68	3252	3	6	TSeries-01292020-1041-039	electrical + opto	1	500	5	0
Scn1a-SST	68	3252	3	6	TSeries-01292020-1041-039	electrical + opto	1	500	6	0
Scn1a-SST	68	3252	3	6	TSeries-01292020-1041-039	electrical + opto	1	500	7	0
Scn1a-SST	68	3252	3	6	TSeries-01292020-1041-039	electrical + opto	1	500	8	0
Scn1a-SST	68	3252	3	6	TSeries-01292020-1041-039	electrical + opto	1	500	9	0
Scn1a-SST	68	3252	3	6	TSeries-01292020-1041-039	electrical + opto	1	500	10	0
Scn1a-SST	68	3252	3	6	TSeries-01292020-1041-039	electrical + opto	1	500	11	0
Scn1a-SST	68	3252	3	6	TSeries-01292020-1041-039	electrical + opto	1	500	12	0
Scn1a-SST	68	3252	3	6	TSeries-01292020-1041-039	electrical + opto	1	500	13	0
Scn1a-SST	68	3252	3	6	TSeries-01292020-1041-039	electrical + opto	1	500	14	0
Scn1a-SST	68	3252	3	6	TSeries-01292020-1041-039	electrical + opto	1	500	15	0
Scn1a-SST	68	3252	3	6	TSeries-01292020-1041-039	electrical + opto	1	500	16	0
Scn1a-SST	68	3252	3	6	TSeries-01292020-1041-039	electrical + opto	1	500	17	0
Scn1a-SST	68	3252	3	6	TSeries-01292020-1041-039	electrical + opto	1	500	18	0
Scn1a-SST	68	3252	3	6	TSeries-01292020-1041-039	electrical + opto	1	500	19	1	0.195458
Scn1a-SST	68	3252	3	6	TSeries-01292020-1041-039	electrical + opto	1	500	20	1	0.311366
Scn1a-SST	68	3252	3	6	TSeries-01292020-1041-039	electrical + opto	1	500	21	1	0.854165
Scn1a-SST	68	3252	3	6	TSeries-01292020-1041-039	electrical + opto	1	500	22	0
Scn1a-SST	68	3252	3	6	TSeries-01292020-1041-039	electrical + opto	1	500	23	0
Scn1a-SST	68	3252	3	6	TSeries-01292020-1041-039	electrical + opto	1	500	24	0
Scn1a-SST	68	3252	3	6	TSeries-01292020-1041-039	electrical + opto	1	500	25	0
Scn1a-SST	68	3252	3	6	TSeries-01292020-1041-039	electrical + opto	1	500	26	0
Scn1a-SST	68	3252	3	6	TSeries-01292020-1041-039	electrical + opto	1	500	27	0
Scn1a-SST	68	3252	3	6	TSeries-01292020-1041-039	electrical + opto	1	500	28	0
Scn1a-SST	68	3252	3	6	TSeries-01292020-1041-039	electrical + opto	1	500	29	0
Scn1a-SST	68	3252	3	6	TSeries-01292020-1041-039	electrical + opto	1	500	30	0
Scn1a-SST	68	3252	3	6	TSeries-01292020-1041-039	electrical + opto	1	500	31	0
Scn1a-SST	68	3252	3	6	TSeries-01292020-1041-039	electrical + opto	1	500	32	0
Scn1a-SST	68	3252	3	6	TSeries-01292020-1041-039	electrical + opto	1	500	33	0
Scn1a-SST	68	3252	3	6	TSeries-01292020-1041-039	electrical + opto	1	500	34	0
Scn1a-SST	68	3252	3	6	TSeries-01292020-1041-039	electrical + opto	1	500	35	1	0.277159
Scn1a-SST	68	3252	3	6	TSeries-01292020-1041-039	electrical + opto	1	500	36	0
Scn1a-SST	68	3252	3	6	TSeries-01292020-1041-039	electrical + opto	1	500	37	0
Scn1a-SST	68	3252	3	6	TSeries-01292020-1041-039	electrical + opto	1	500	38	0
Scn1a-SST	68	3252	3	6	TSeries-01292020-1041-039	electrical + opto	1	500	39	1	2.14375
Scn1a-SST	68	3252	3	6	TSeries-01292020-1041-039	electrical + opto	1	500	40	0
Scn1a-SST	68	3252	3	6	TSeries-01292020-1041-039	electrical + opto	1	500	41	0
Scn1a-SST	68	3252	3	6	TSeries-01292020-1041-039	electrical + opto	1	500	42	0
Scn1a-SST	68	3252	3	6	TSeries-01292020-1041-039	electrical + opto	1	500	43	0
Scn1a-SST	68	3252	3	6	TSeries-01292020-1041-039	electrical + opto	1	500	44	0
Scn1a-SST	68	3252	3	6	TSeries-01292020-1041-039	electrical + opto	1	500	45	1	1.12638
Scn1a-SST	68	3252	3	6	TSeries-01292020-1041-039	electrical + opto	1	500	46	1	0.287355
Scn1a-SST	68	3252	3	6	TSeries-01292020-1041-039	electrical + opto	1	500	47	1	0.330873
Scn1a-SST	68	3252	3	6	TSeries-01292020-1041-039	electrical + opto	1	500	48	0
Scn1a-SST	68	3252	3	6	TSeries-01292020-1041-039	electrical + opto	1	500	49	0
Scn1a-SST	68	3252	3	6	TSeries-01292020-1041-039	electrical + opto	1	500	50	1	0.670711
Scn1a-SST	68	3252	3	6	TSeries-01292020-1041-039	electrical + opto	1	500	51	1	2.19863
Scn1a-SST	68	3252	3	6	TSeries-01292020-1041-039	electrical + opto	1	500	52	0
Scn1a-SST	68	3252	3	6	TSeries-01292020-1041-039	electrical + opto	1	500	53	1	0.313398
Scn1a-SST	68	3252	3	6	TSeries-01292020-1041-039	electrical + opto	1	500	54	0
Scn1a-SST	68	3252	3	6	TSeries-01292020-1041-039	electrical + opto	1	500	55	0
Scn1a-SST	68	3252	3	6	TSeries-01292020-1041-039	electrical + opto	1	500	56	0
Scn1a-SST	68	3252	3	6	TSeries-01292020-1041-039	electrical + opto	1	500	57	0
Scn1a-SST	68	3252	3	6	TSeries-01292020-1041-039	electrical + opto	1	500	58	0
Scn1a-SST	68	3252	3	6	TSeries-01292020-1041-039	electrical + opto	1	500	59	1	0.11061
Scn1a-SST	68	3252	3	6	TSeries-01292020-1041-039	electrical + opto	1	500	60	0
Scn1a-SST	68	3252	3	6	TSeries-01292020-1041-039	electrical + opto	1	500	61	1	0.185613
Scn1a-SST	68	3252	3	6	TSeries-01292020-1041-039	electrical + opto	1	500	62	0
Scn1a-SST	68	3252	3	7	TSeries-01292020-1041-045	electrical	1	500	0	1	1.70528
Scn1a-SST	68	3252	3	7	TSeries-01292020-1041-045	electrical	1	500	1	1	0.714945
Scn1a-SST	68	3252	3	7	TSeries-01292020-1041-045	electrical	1	500	2	1	0.954503
Scn1a-SST	68	3252	3	7	TSeries-01292020-1041-045	electrical	1	500	3	1	0.394704
Scn1a-SST	68	3252	3	7	TSeries-01292020-1041-045	electrical	1	500	4	1	0.513999
Scn1a-SST	68	3252	3	7	TSeries-01292020-1041-045	electrical	1	500	5	1	2.96585
Scn1a-SST	68	3252	3	7	TSeries-01292020-1041-045	electrical	1	500	6	1	2.02613
Scn1a-SST	68	3252	3	7	TSeries-01292020-1041-045	electrical	1	500	7	1	0.502797
Scn1a-SST	68	3252	3	7	TSeries-01292020-1041-045	electrical	1	500	8	1	1.91305
Scn1a-SST	68	3252	3	7	TSeries-01292020-1041-045	electrical	1	500	9	1	0.514329
Scn1a-SST	68	3252	3	7	TSeries-01292020-1041-045	electrical	1	500	10	1	2.25394
Scn1a-SST	68	3252	3	7	TSeries-01292020-1041-045	electrical	1	500	11	0
Scn1a-SST	68	3252	3	7	TSeries-01292020-1041-045	electrical	1	500	12	1	1.09785
Scn1a-SST	68	3252	3	7	TSeries-01292020-1041-045	electrical	1	500	13	1	0.325078
Scn1a-SST	68	3252	3	7	TSeries-01292020-1041-045	electrical	1	500	14	0
Scn1a-SST	68	3252	3	7	TSeries-01292020-1041-045	electrical	1	500	15	1	0.577889
Scn1a-SST	68	3252	3	7	TSeries-01292020-1041-045	electrical	1	500	16	0
Scn1a-SST	68	3252	3	7	TSeries-01292020-1041-045	electrical	1	500	17	0
Scn1a-SST	68	3252	3	7	TSeries-01292020-1041-045	electrical	1	500	18	1	0.341903
Scn1a-SST	68	3252	3	7	TSeries-01292020-1041-045	electrical	1	500	19	1	0.280861
Scn1a-SST	68	3252	3	7	TSeries-01292020-1041-045	electrical	1	500	20	1	0.404682
Scn1a-SST	68	3252	3	7	TSeries-01292020-1041-045	electrical	1	500	21	1	1.02813
Scn1a-SST	68	3252	3	7	TSeries-01292020-1041-045	electrical	1	500	22	1	0.266772
Scn1a-SST	68	3252	3	7	TSeries-01292020-1041-045	electrical	1	500	23	1	0.533216
Scn1a-SST	68	3252	3	7	TSeries-01292020-1041-045	electrical	1	500	24	1	0.235494
Scn1a-SST	68	3252	3	7	TSeries-01292020-1041-045	electrical	1	500	25	1	0.244259
Scn1a-SST	68	3252	3	7	TSeries-01292020-1041-045	electrical	1	500	26	0
Scn1a-SST	68	3252	3	7	TSeries-01292020-1041-045	electrical	1	500	27	0
Scn1a-SST	68	3252	3	7	TSeries-01292020-1041-045	electrical	1	500	28	0
Scn1a-SST	68	3252	3	7	TSeries-01292020-1041-045	electrical	1	500	29	0
Scn1a-SST	68	3252	3	7	TSeries-01292020-1041-045	electrical	1	500	30	0
Scn1a-SST	68	3252	3	7	TSeries-01292020-1041-045	electrical	1	500	31	0
Scn1a-SST	68	3252	3	7	TSeries-01292020-1041-045	electrical	1	500	32	0
Scn1a-SST	68	3252	3	7	TSeries-01292020-1041-045	electrical	1	500	33	0
Scn1a-SST	68	3252	3	7	TSeries-01292020-1041-045	electrical	1	500	34	0
Scn1a-SST	68	3252	3	7	TSeries-01292020-1041-045	electrical	1	500	35	0
Scn1a-SST	68	3252	3	7	TSeries-01292020-1041-045	electrical	1	500	36	1	0.452279
Scn1a-SST	68	3252	3	7	TSeries-01292020-1041-045	electrical	1	500	37	0
Scn1a-SST	68	3252	3	7	TSeries-01292020-1041-045	electrical	1	500	38	0
Scn1a-SST	68	3252	3	7	TSeries-01292020-1041-045	electrical	1	500	39	0
Scn1a-SST	68	3252	3	7	TSeries-01292020-1041-045	electrical	1	500	40	1	0.430098
Scn1a-SST	68	3252	3	7	TSeries-01292020-1041-046	opto alone control	1	500	0	0
Scn1a-SST	68	3252	3	7	TSeries-01292020-1041-046	opto alone control	1	500	1	1	0.623273
Scn1a-SST	68	3252	3	7	TSeries-01292020-1041-046	opto alone control	1	500	2	1	0.855716
Scn1a-SST	68	3252	3	7	TSeries-01292020-1041-046	opto alone control	1	500	3	1	0.26471
Scn1a-SST	68	3252	3	7	TSeries-01292020-1041-046	opto alone control	1	500	4	1	0.279548
Scn1a-SST	68	3252	3	7	TSeries-01292020-1041-046	opto alone control	1	500	5	1	2.37588
Scn1a-SST	68	3252	3	7	TSeries-01292020-1041-046	opto alone control	1	500	6	1	0.844553
Scn1a-SST	68	3252	3	7	TSeries-01292020-1041-046	opto alone control	1	500	7	1	0.458898
Scn1a-SST	68	3252	3	7	TSeries-01292020-1041-046	opto alone control	1	500	8	1	1.59344
Scn1a-SST	68	3252	3	7	TSeries-01292020-1041-046	opto alone control	1	500	9	1	2.3089
Scn1a-SST	68	3252	3	7	TSeries-01292020-1041-046	opto alone control	1	500	10	1	0.73041
Scn1a-SST	68	3252	3	7	TSeries-01292020-1041-046	opto alone control	1	500	11	0
Scn1a-SST	68	3252	3	7	TSeries-01292020-1041-046	opto alone control	1	500	12	0
Scn1a-SST	68	3252	3	7	TSeries-01292020-1041-046	opto alone control	1	500	13	0
Scn1a-SST	68	3252	3	7	TSeries-01292020-1041-046	opto alone control	1	500	14	0
Scn1a-SST	68	3252	3	7	TSeries-01292020-1041-046	opto alone control	1	500	15	1	0.612019
Scn1a-SST	68	3252	3	7	TSeries-01292020-1041-046	opto alone control	1	500	16	0
Scn1a-SST	68	3252	3	7	TSeries-01292020-1041-046	opto alone control	1	500	17	1	0.287079
Scn1a-SST	68	3252	3	7	TSeries-01292020-1041-046	opto alone control	1	500	18	1	0.397806
Scn1a-SST	68	3252	3	7	TSeries-01292020-1041-046	opto alone control	1	500	19	1	0.25833
Scn1a-SST	68	3252	3	7	TSeries-01292020-1041-046	opto alone control	1	500	20	0
Scn1a-SST	68	3252	3	7	TSeries-01292020-1041-046	opto alone control	1	500	21	1	0.47661
Scn1a-SST	68	3252	3	7	TSeries-01292020-1041-046	opto alone control	1	500	22	1	0.275058
Scn1a-SST	68	3252	3	7	TSeries-01292020-1041-046	opto alone control	1	500	23	1	0.481047
Scn1a-SST	68	3252	3	7	TSeries-01292020-1041-046	opto alone control	1	500	24	0
Scn1a-SST	68	3252	3	7	TSeries-01292020-1041-046	opto alone control	1	500	25	0
Scn1a-SST	68	3252	3	7	TSeries-01292020-1041-046	opto alone control	1	500	26	0
Scn1a-SST	68	3252	3	7	TSeries-01292020-1041-046	opto alone control	1	500	27	0
Scn1a-SST	68	3252	3	7	TSeries-01292020-1041-046	opto alone control	1	500	28	0
Scn1a-SST	68	3252	3	7	TSeries-01292020-1041-046	opto alone control	1	500	29	0
Scn1a-SST	68	3252	3	7	TSeries-01292020-1041-046	opto alone control	1	500	30	0
Scn1a-SST	68	3252	3	7	TSeries-01292020-1041-046	opto alone control	1	500	31	0
Scn1a-SST	68	3252	3	7	TSeries-01292020-1041-046	opto alone control	1	500	32	0
Scn1a-SST	68	3252	3	7	TSeries-01292020-1041-046	opto alone control	1	500	33	0
Scn1a-SST	68	3252	3	7	TSeries-01292020-1041-046	opto alone control	1	500	34	0
Scn1a-SST	68	3252	3	7	TSeries-01292020-1041-046	opto alone control	1	500	35	0
Scn1a-SST	68	3252	3	7	TSeries-01292020-1041-046	opto alone control	1	500	36	1	0.457908
Scn1a-SST	68	3252	3	7	TSeries-01292020-1041-046	opto alone control	1	500	37	0
Scn1a-SST	68	3252	3	7	TSeries-01292020-1041-046	opto alone control	1	500	38	0
Scn1a-SST	68	3252	3	7	TSeries-01292020-1041-046	opto alone control	1	500	39	0
Scn1a-SST	68	3252	3	7	TSeries-01292020-1041-046	opto alone control	1	500	40	1	0.394672
Scn1a-SST	68	3252	3	7	TSeries-01292020-1041-050	electrical + opto	1	500	0	0
Scn1a-SST	68	3252	3	7	TSeries-01292020-1041-050	electrical + opto	1	500	1	1	0.258173
Scn1a-SST	68	3252	3	7	TSeries-01292020-1041-050	electrical + opto	1	500	2	1	0.465698
Scn1a-SST	68	3252	3	7	TSeries-01292020-1041-050	electrical + opto	1	500	3	1	0.198537
Scn1a-SST	68	3252	3	7	TSeries-01292020-1041-050	electrical + opto	1	500	4	1	0.258119
Scn1a-SST	68	3252	3	7	TSeries-01292020-1041-050	electrical + opto	1	500	5	1	1.86543
Scn1a-SST	68	3252	3	7	TSeries-01292020-1041-050	electrical + opto	1	500	6	1	0.61176
Scn1a-SST	68	3252	3	7	TSeries-01292020-1041-050	electrical + opto	1	500	7	1	0.19205
Scn1a-SST	68	3252	3	7	TSeries-01292020-1041-050	electrical + opto	1	500	8	1	1.10845
Scn1a-SST	68	3252	3	7	TSeries-01292020-1041-050	electrical + opto	1	500	9	0
Scn1a-SST	68	3252	3	7	TSeries-01292020-1041-050	electrical + opto	1	500	10	1	0.198794
Scn1a-SST	68	3252	3	7	TSeries-01292020-1041-050	electrical + opto	1	500	11	0
Scn1a-SST	68	3252	3	7	TSeries-01292020-1041-050	electrical + opto	1	500	12	0
Scn1a-SST	68	3252	3	7	TSeries-01292020-1041-050	electrical + opto	1	500	13	0
Scn1a-SST	68	3252	3	7	TSeries-01292020-1041-050	electrical + opto	1	500	14	0
Scn1a-SST	68	3252	3	7	TSeries-01292020-1041-050	electrical + opto	1	500	15	1	0.326129
Scn1a-SST	68	3252	3	7	TSeries-01292020-1041-050	electrical + opto	1	500	16	0
Scn1a-SST	68	3252	3	7	TSeries-01292020-1041-050	electrical + opto	1	500	17	0
Scn1a-SST	68	3252	3	7	TSeries-01292020-1041-050	electrical + opto	1	500	18	1	0.610955
Scn1a-SST	68	3252	3	7	TSeries-01292020-1041-050	electrical + opto	1	500	19	0
Scn1a-SST	68	3252	3	7	TSeries-01292020-1041-050	electrical + opto	1	500	20	1	0.142825
Scn1a-SST	68	3252	3	7	TSeries-01292020-1041-050	electrical + opto	1	500	21	1	1.02044
Scn1a-SST	68	3252	3	7	TSeries-01292020-1041-050	electrical + opto	1	500	22	1	0.253193
Scn1a-SST	68	3252	3	7	TSeries-01292020-1041-050	electrical + opto	1	500	23	1	0.317963
Scn1a-SST	68	3252	3	7	TSeries-01292020-1041-050	electrical + opto	1	500	24	0
Scn1a-SST	68	3252	3	7	TSeries-01292020-1041-050	electrical + opto	1	500	25	0
Scn1a-SST	68	3252	3	7	TSeries-01292020-1041-050	electrical + opto	1	500	26	0
Scn1a-SST	68	3252	3	7	TSeries-01292020-1041-050	electrical + opto	1	500	27	0
Scn1a-SST	68	3252	3	7	TSeries-01292020-1041-050	electrical + opto	1	500	28	0
Scn1a-SST	68	3252	3	7	TSeries-01292020-1041-050	electrical + opto	1	500	29	0
Scn1a-SST	68	3252	3	7	TSeries-01292020-1041-050	electrical + opto	1	500	30	0
Scn1a-SST	68	3252	3	7	TSeries-01292020-1041-050	electrical + opto	1	500	31	0
Scn1a-SST	68	3252	3	7	TSeries-01292020-1041-050	electrical + opto	1	500	32	0
Scn1a-SST	68	3252	3	7	TSeries-01292020-1041-050	electrical + opto	1	500	33	0
Scn1a-SST	68	3252	3	7	TSeries-01292020-1041-050	electrical + opto	1	500	34	0
Scn1a-SST	68	3252	3	7	TSeries-01292020-1041-050	electrical + opto	1	500	35	0
Scn1a-SST	68	3252	3	7	TSeries-01292020-1041-050	electrical + opto	1	500	36	0
Scn1a-SST	68	3252	3	7	TSeries-01292020-1041-050	electrical + opto	1	500	37	0
Scn1a-SST	68	3252	3	7	TSeries-01292020-1041-050	electrical + opto	1	500	38	0
Scn1a-SST	68	3252	3	7	TSeries-01292020-1041-050	electrical + opto	1	500	39	0
Scn1a-SST	68	3252	3	7	TSeries-01292020-1041-050	electrical + opto	1	500	40	0
Scn1a-SST	71	3220	1	1	TSeries-01302020-1021-001	electrical	1	500	0	1	0.18037
Scn1a-SST	71	3220	1	1	TSeries-01302020-1021-001	electrical	1	500	1	0
Scn1a-SST	71	3220	1	1	TSeries-01302020-1021-001	electrical	1	500	2	1	0.42672
Scn1a-SST	71	3220	1	1	TSeries-01302020-1021-001	electrical	1	500	3	1	0.326972
Scn1a-SST	71	3220	1	1	TSeries-01302020-1021-001	electrical	1	500	4	1	0.709431
Scn1a-SST	71	3220	1	1	TSeries-01302020-1021-001	electrical	1	500	5	1	0.518042
Scn1a-SST	71	3220	1	1	TSeries-01302020-1021-001	electrical	1	500	6	1	0.565468
Scn1a-SST	71	3220	1	1	TSeries-01302020-1021-001	electrical	1	500	7	1	0.38605
Scn1a-SST	71	3220	1	1	TSeries-01302020-1021-001	electrical	1	500	8	1	0.554414
Scn1a-SST	71	3220	1	1	TSeries-01302020-1021-001	electrical	1	500	9	1	0.600253
Scn1a-SST	71	3220	1	1	TSeries-01302020-1021-001	electrical	1	500	10	1	0.471562
Scn1a-SST	71	3220	1	1	TSeries-01302020-1021-001	electrical	1	500	11	1	0.259943
Scn1a-SST	71	3220	1	1	TSeries-01302020-1021-001	electrical	1	500	12	1	0.472425
Scn1a-SST	71	3220	1	1	TSeries-01302020-1021-001	electrical	1	500	13	1	0.356593
Scn1a-SST	71	3220	1	1	TSeries-01302020-1021-001	electrical	1	500	14	1	0.364723
Scn1a-SST	71	3220	1	1	TSeries-01302020-1021-001	electrical	1	500	15	1	0.462646
Scn1a-SST	71	3220	1	1	TSeries-01302020-1021-001	electrical	1	500	16	1	0.560315
Scn1a-SST	71	3220	1	1	TSeries-01302020-1021-001	electrical	1	500	17	1	0.681389
Scn1a-SST	71	3220	1	1	TSeries-01302020-1021-001	electrical	1	500	18	1	0.346689
Scn1a-SST	71	3220	1	1	TSeries-01302020-1021-001	electrical	1	500	19	1	0.189017
Scn1a-SST	71	3220	1	1	TSeries-01302020-1021-001	electrical	1	500	20	1	0.21069
Scn1a-SST	71	3220	1	1	TSeries-01302020-1021-001	electrical	1	500	21	1	0.669534
Scn1a-SST	71	3220	1	1	TSeries-01302020-1021-001	electrical	1	500	22	1	0.491718
Scn1a-SST	71	3220	1	1	TSeries-01302020-1021-001	electrical	1	500	23	1	0.461372
Scn1a-SST	71	3220	1	1	TSeries-01302020-1021-001	electrical	1	500	24	1	0.225967
Scn1a-SST	71	3220	1	1	TSeries-01302020-1021-001	electrical	1	500	25	1	0.211547
Scn1a-SST	71	3220	1	1	TSeries-01302020-1021-001	electrical	1	500	26	1	0.740669
Scn1a-SST	71	3220	1	1	TSeries-01302020-1021-001	electrical	1	500	27	0
Scn1a-SST	71	3220	1	1	TSeries-01302020-1021-001	electrical	1	500	28	1	0.683508
Scn1a-SST	71	3220	1	1	TSeries-01302020-1021-001	electrical	1	500	29	1	0.291098
Scn1a-SST	71	3220	1	1	TSeries-01302020-1021-001	electrical	1	500	30	1	0.552762
Scn1a-SST	71	3220	1	1	TSeries-01302020-1021-001	electrical	1	500	31	1	0.502057
Scn1a-SST	71	3220	1	1	TSeries-01302020-1021-001	electrical	1	500	32	1	0.292844
Scn1a-SST	71	3220	1	1	TSeries-01302020-1021-001	electrical	1	500	33	1	0.172325
Scn1a-SST	71	3220	1	1	TSeries-01302020-1021-001	electrical	1	500	34	1	0.884895
Scn1a-SST	71	3220	1	1	TSeries-01302020-1021-001	electrical	1	500	35	1	1.68055
Scn1a-SST	71	3220	1	1	TSeries-01302020-1021-002	opto alone control	1	500	0	0
Scn1a-SST	71	3220	1	1	TSeries-01302020-1021-002	opto alone control	1	500	1	0
Scn1a-SST	71	3220	1	1	TSeries-01302020-1021-002	opto alone control	1	500	2	0
Scn1a-SST	71	3220	1	1	TSeries-01302020-1021-002	opto alone control	1	500	3	0
Scn1a-SST	71	3220	1	1	TSeries-01302020-1021-002	opto alone control	1	500	4	0
Scn1a-SST	71	3220	1	1	TSeries-01302020-1021-002	opto alone control	1	500	5	0
Scn1a-SST	71	3220	1	1	TSeries-01302020-1021-002	opto alone control	1	500	6	0
Scn1a-SST	71	3220	1	1	TSeries-01302020-1021-002	opto alone control	1	500	7	0
Scn1a-SST	71	3220	1	1	TSeries-01302020-1021-002	opto alone control	1	500	8	0
Scn1a-SST	71	3220	1	1	TSeries-01302020-1021-002	opto alone control	1	500	9	0
Scn1a-SST	71	3220	1	1	TSeries-01302020-1021-002	opto alone control	1	500	10	0
Scn1a-SST	71	3220	1	1	TSeries-01302020-1021-002	opto alone control	1	500	11	0
Scn1a-SST	71	3220	1	1	TSeries-01302020-1021-002	opto alone control	1	500	12	0
Scn1a-SST	71	3220	1	1	TSeries-01302020-1021-002	opto alone control	1	500	13	0
Scn1a-SST	71	3220	1	1	TSeries-01302020-1021-002	opto alone control	1	500	14	0
Scn1a-SST	71	3220	1	1	TSeries-01302020-1021-002	opto alone control	1	500	15	0
Scn1a-SST	71	3220	1	1	TSeries-01302020-1021-002	opto alone control	1	500	16	0
Scn1a-SST	71	3220	1	1	TSeries-01302020-1021-002	opto alone control	1	500	17	0
Scn1a-SST	71	3220	1	1	TSeries-01302020-1021-002	opto alone control	1	500	18	0
Scn1a-SST	71	3220	1	1	TSeries-01302020-1021-002	opto alone control	1	500	19	0
Scn1a-SST	71	3220	1	1	TSeries-01302020-1021-002	opto alone control	1	500	20	0
Scn1a-SST	71	3220	1	1	TSeries-01302020-1021-002	opto alone control	1	500	21	0
Scn1a-SST	71	3220	1	1	TSeries-01302020-1021-002	opto alone control	1	500	22	0
Scn1a-SST	71	3220	1	1	TSeries-01302020-1021-002	opto alone control	1	500	23	0
Scn1a-SST	71	3220	1	1	TSeries-01302020-1021-002	opto alone control	1	500	24	0
Scn1a-SST	71	3220	1	1	TSeries-01302020-1021-002	opto alone control	1	500	25	0
Scn1a-SST	71	3220	1	1	TSeries-01302020-1021-002	opto alone control	1	500	26	0
Scn1a-SST	71	3220	1	1	TSeries-01302020-1021-002	opto alone control	1	500	27	0
Scn1a-SST	71	3220	1	1	TSeries-01302020-1021-002	opto alone control	1	500	28	0
Scn1a-SST	71	3220	1	1	TSeries-01302020-1021-002	opto alone control	1	500	29	0
Scn1a-SST	71	3220	1	1	TSeries-01302020-1021-002	opto alone control	1	500	30	0
Scn1a-SST	71	3220	1	1	TSeries-01302020-1021-002	opto alone control	1	500	31	0
Scn1a-SST	71	3220	1	1	TSeries-01302020-1021-002	opto alone control	1	500	32	0
Scn1a-SST	71	3220	1	1	TSeries-01302020-1021-002	opto alone control	1	500	33	0
Scn1a-SST	71	3220	1	1	TSeries-01302020-1021-002	opto alone control	1	500	34	0
Scn1a-SST	71	3220	1	1	TSeries-01302020-1021-002	opto alone control	1	500	35	0
Scn1a-SST	71	3220	1	1	TSeries-01302020-1021-006	electrical + opto	1	500	0	0
Scn1a-SST	71	3220	1	1	TSeries-01302020-1021-006	electrical + opto	1	500	1	0
Scn1a-SST	71	3220	1	1	TSeries-01302020-1021-006	electrical + opto	1	500	2	0
Scn1a-SST	71	3220	1	1	TSeries-01302020-1021-006	electrical + opto	1	500	3	0
Scn1a-SST	71	3220	1	1	TSeries-01302020-1021-006	electrical + opto	1	500	4	1	0.264442
Scn1a-SST	71	3220	1	1	TSeries-01302020-1021-006	electrical + opto	1	500	5	1	0.365842
Scn1a-SST	71	3220	1	1	TSeries-01302020-1021-006	electrical + opto	1	500	6	1	0.397944
Scn1a-SST	71	3220	1	1	TSeries-01302020-1021-006	electrical + opto	1	500	7	1	0.435345
Scn1a-SST	71	3220	1	1	TSeries-01302020-1021-006	electrical + opto	1	500	8	1	0.53342
Scn1a-SST	71	3220	1	1	TSeries-01302020-1021-006	electrical + opto	1	500	9	1	0.329793
Scn1a-SST	71	3220	1	1	TSeries-01302020-1021-006	electrical + opto	1	500	10	1	0.47416
Scn1a-SST	71	3220	1	1	TSeries-01302020-1021-006	electrical + opto	1	500	11	1	0.17062
Scn1a-SST	71	3220	1	1	TSeries-01302020-1021-006	electrical + opto	1	500	12	0
Scn1a-SST	71	3220	1	1	TSeries-01302020-1021-006	electrical + opto	1	500	13	1	0.499703
Scn1a-SST	71	3220	1	1	TSeries-01302020-1021-006	electrical + opto	1	500	14	1	0.329902
Scn1a-SST	71	3220	1	1	TSeries-01302020-1021-006	electrical + opto	1	500	15	1	0.307137
Scn1a-SST	71	3220	1	1	TSeries-01302020-1021-006	electrical + opto	1	500	16	0
Scn1a-SST	71	3220	1	1	TSeries-01302020-1021-006	electrical + opto	1	500	17	0
Scn1a-SST	71	3220	1	1	TSeries-01302020-1021-006	electrical + opto	1	500	18	1	0.169424
Scn1a-SST	71	3220	1	1	TSeries-01302020-1021-006	electrical + opto	1	500	19	1	0.206783
Scn1a-SST	71	3220	1	1	TSeries-01302020-1021-006	electrical + opto	1	500	20	0
Scn1a-SST	71	3220	1	1	TSeries-01302020-1021-006	electrical + opto	1	500	21	0
Scn1a-SST	71	3220	1	1	TSeries-01302020-1021-006	electrical + opto	1	500	22	0
Scn1a-SST	71	3220	1	1	TSeries-01302020-1021-006	electrical + opto	1	500	23	0
Scn1a-SST	71	3220	1	1	TSeries-01302020-1021-006	electrical + opto	1	500	24	0
Scn1a-SST	71	3220	1	1	TSeries-01302020-1021-006	electrical + opto	1	500	25	0
Scn1a-SST	71	3220	1	1	TSeries-01302020-1021-006	electrical + opto	1	500	26	0
Scn1a-SST	71	3220	1	1	TSeries-01302020-1021-006	electrical + opto	1	500	27	1	0.135297
Scn1a-SST	71	3220	1	1	TSeries-01302020-1021-006	electrical + opto	1	500	28	0
Scn1a-SST	71	3220	1	1	TSeries-01302020-1021-006	electrical + opto	1	500	29	0
Scn1a-SST	71	3220	1	1	TSeries-01302020-1021-006	electrical + opto	1	500	30	1	0.566333
Scn1a-SST	71	3220	1	1	TSeries-01302020-1021-006	electrical + opto	1	500	31	1	0.144635
Scn1a-SST	71	3220	1	1	TSeries-01302020-1021-006	electrical + opto	1	500	32	0
Scn1a-SST	71	3220	1	1	TSeries-01302020-1021-006	electrical + opto	1	500	33	0
Scn1a-SST	71	3220	1	1	TSeries-01302020-1021-006	electrical + opto	1	500	34	1	0.608593
Scn1a-SST	71	3220	1	1	TSeries-01302020-1021-006	electrical + opto	1	500	35	1	0.55003
Scn1a-SST	71	3220	1	2	TSeries-01302020-1021-012	electrical	1	500	0	1	0.39465
Scn1a-SST	71	3220	1	2	TSeries-01302020-1021-012	electrical	1	500	1	0
Scn1a-SST	71	3220	1	2	TSeries-01302020-1021-012	electrical	1	500	2	1	0.968258
Scn1a-SST	71	3220	1	2	TSeries-01302020-1021-012	electrical	1	500	3	1	0.230314
Scn1a-SST	71	3220	1	2	TSeries-01302020-1021-012	electrical	1	500	4	1	0.203301
Scn1a-SST	71	3220	1	2	TSeries-01302020-1021-012	electrical	1	500	5	0
Scn1a-SST	71	3220	1	2	TSeries-01302020-1021-012	electrical	1	500	6	1	0.958577
Scn1a-SST	71	3220	1	2	TSeries-01302020-1021-012	electrical	1	500	7	1	0.467771
Scn1a-SST	71	3220	1	2	TSeries-01302020-1021-012	electrical	1	500	8	1	0.207775
Scn1a-SST	71	3220	1	2	TSeries-01302020-1021-012	electrical	1	500	9	1	0.556735
Scn1a-SST	71	3220	1	2	TSeries-01302020-1021-012	electrical	1	500	10	1	0.670455
Scn1a-SST	71	3220	1	2	TSeries-01302020-1021-012	electrical	1	500	11	1	0.598692
Scn1a-SST	71	3220	1	2	TSeries-01302020-1021-012	electrical	1	500	12	0
Scn1a-SST	71	3220	1	2	TSeries-01302020-1021-012	electrical	1	500	13	1	0.762801
Scn1a-SST	71	3220	1	2	TSeries-01302020-1021-012	electrical	1	500	14	0
Scn1a-SST	71	3220	1	2	TSeries-01302020-1021-012	electrical	1	500	15	1	0.255558
Scn1a-SST	71	3220	1	2	TSeries-01302020-1021-012	electrical	1	500	16	1	0.770811
Scn1a-SST	71	3220	1	2	TSeries-01302020-1021-012	electrical	1	500	17	1	0.886584
Scn1a-SST	71	3220	1	2	TSeries-01302020-1021-012	electrical	1	500	18	1	0.5719
Scn1a-SST	71	3220	1	2	TSeries-01302020-1021-012	electrical	1	500	19	1	0.526602
Scn1a-SST	71	3220	1	2	TSeries-01302020-1021-012	electrical	1	500	20	1	0.482928
Scn1a-SST	71	3220	1	2	TSeries-01302020-1021-012	electrical	1	500	21	1	0.596808
Scn1a-SST	71	3220	1	2	TSeries-01302020-1021-012	electrical	1	500	22	1	0.470641
Scn1a-SST	71	3220	1	2	TSeries-01302020-1021-012	electrical	1	500	23	1	0.664903
Scn1a-SST	71	3220	1	2	TSeries-01302020-1021-012	electrical	1	500	24	1	0.528975
Scn1a-SST	71	3220	1	2	TSeries-01302020-1021-013	opto alone control	1	500	0	0
Scn1a-SST	71	3220	1	2	TSeries-01302020-1021-013	opto alone control	1	500	1	0
Scn1a-SST	71	3220	1	2	TSeries-01302020-1021-013	opto alone control	1	500	2	0
Scn1a-SST	71	3220	1	2	TSeries-01302020-1021-013	opto alone control	1	500	3	0
Scn1a-SST	71	3220	1	2	TSeries-01302020-1021-013	opto alone control	1	500	4	0
Scn1a-SST	71	3220	1	2	TSeries-01302020-1021-013	opto alone control	1	500	5	0
Scn1a-SST	71	3220	1	2	TSeries-01302020-1021-013	opto alone control	1	500	6	0
Scn1a-SST	71	3220	1	2	TSeries-01302020-1021-013	opto alone control	1	500	7	0
Scn1a-SST	71	3220	1	2	TSeries-01302020-1021-013	opto alone control	1	500	8	0
Scn1a-SST	71	3220	1	2	TSeries-01302020-1021-013	opto alone control	1	500	9	0
Scn1a-SST	71	3220	1	2	TSeries-01302020-1021-013	opto alone control	1	500	10	0
Scn1a-SST	71	3220	1	2	TSeries-01302020-1021-013	opto alone control	1	500	11	0
Scn1a-SST	71	3220	1	2	TSeries-01302020-1021-013	opto alone control	1	500	12	0
Scn1a-SST	71	3220	1	2	TSeries-01302020-1021-013	opto alone control	1	500	13	0
Scn1a-SST	71	3220	1	2	TSeries-01302020-1021-013	opto alone control	1	500	14	0
Scn1a-SST	71	3220	1	2	TSeries-01302020-1021-013	opto alone control	1	500	15	0
Scn1a-SST	71	3220	1	2	TSeries-01302020-1021-013	opto alone control	1	500	16	0
Scn1a-SST	71	3220	1	2	TSeries-01302020-1021-013	opto alone control	1	500	17	0
Scn1a-SST	71	3220	1	2	TSeries-01302020-1021-013	opto alone control	1	500	18	0
Scn1a-SST	71	3220	1	2	TSeries-01302020-1021-013	opto alone control	1	500	19	0
Scn1a-SST	71	3220	1	2	TSeries-01302020-1021-013	opto alone control	1	500	20	0
Scn1a-SST	71	3220	1	2	TSeries-01302020-1021-013	opto alone control	1	500	21	0
Scn1a-SST	71	3220	1	2	TSeries-01302020-1021-013	opto alone control	1	500	22	0
Scn1a-SST	71	3220	1	2	TSeries-01302020-1021-013	opto alone control	1	500	23	0
Scn1a-SST	71	3220	1	2	TSeries-01302020-1021-013	opto alone control	1	500	24	0
Scn1a-SST	71	3220	1	2	TSeries-01302020-1021-017	electrical + opto	1	500	0	1	0.431689
Scn1a-SST	71	3220	1	2	TSeries-01302020-1021-017	electrical + opto	1	500	1	0
Scn1a-SST	71	3220	1	2	TSeries-01302020-1021-017	electrical + opto	1	500	2	1	0.384858
Scn1a-SST	71	3220	1	2	TSeries-01302020-1021-017	electrical + opto	1	500	3	0
Scn1a-SST	71	3220	1	2	TSeries-01302020-1021-017	electrical + opto	1	500	4	1	0.285559
Scn1a-SST	71	3220	1	2	TSeries-01302020-1021-017	electrical + opto	1	500	5	1	0.167028
Scn1a-SST	71	3220	1	2	TSeries-01302020-1021-017	electrical + opto	1	500	6	1	0.275887
Scn1a-SST	71	3220	1	2	TSeries-01302020-1021-017	electrical + opto	1	500	7	1	0.456631
Scn1a-SST	71	3220	1	2	TSeries-01302020-1021-017	electrical + opto	1	500	8	1	0.251542
Scn1a-SST	71	3220	1	2	TSeries-01302020-1021-017	electrical + opto	1	500	9	1	0.554034
Scn1a-SST	71	3220	1	2	TSeries-01302020-1021-017	electrical + opto	1	500	10	1	0.750162
Scn1a-SST	71	3220	1	2	TSeries-01302020-1021-017	electrical + opto	1	500	11	1	0.51659
Scn1a-SST	71	3220	1	2	TSeries-01302020-1021-017	electrical + opto	1	500	12	1	0.195775
Scn1a-SST	71	3220	1	2	TSeries-01302020-1021-017	electrical + opto	1	500	13	1	0.596646
Scn1a-SST	71	3220	1	2	TSeries-01302020-1021-017	electrical + opto	1	500	14	1	0.112061
Scn1a-SST	71	3220	1	2	TSeries-01302020-1021-017	electrical + opto	1	500	15	1	0.225046
Scn1a-SST	71	3220	1	2	TSeries-01302020-1021-017	electrical + opto	1	500	16	1	0.489947
Scn1a-SST	71	3220	1	2	TSeries-01302020-1021-017	electrical + opto	1	500	17	1	0.449123
Scn1a-SST	71	3220	1	2	TSeries-01302020-1021-017	electrical + opto	1	500	18	1	0.40171
Scn1a-SST	71	3220	1	2	TSeries-01302020-1021-017	electrical + opto	1	500	19	1	0.481392
Scn1a-SST	71	3220	1	2	TSeries-01302020-1021-017	electrical + opto	1	500	20	1	0.530933
Scn1a-SST	71	3220	1	2	TSeries-01302020-1021-017	electrical + opto	1	500	21	0
Scn1a-SST	71	3220	1	2	TSeries-01302020-1021-017	electrical + opto	1	500	22	1	0.508439
Scn1a-SST	71	3220	1	2	TSeries-01302020-1021-017	electrical + opto	1	500	23	1	0.597417
Scn1a-SST	71	3220	1	2	TSeries-01302020-1021-017	electrical + opto	1	500	24	1	0.608802
Scn1a-SST	71	3220	1	3	TSeries-01302020-1021-023	electrical	1	500	0	1	0.638706
Scn1a-SST	71	3220	1	3	TSeries-01302020-1021-023	electrical	1	500	1	1	0.652513
Scn1a-SST	71	3220	1	3	TSeries-01302020-1021-023	electrical	1	500	2	1	0.688957
Scn1a-SST	71	3220	1	3	TSeries-01302020-1021-023	electrical	1	500	3	0
Scn1a-SST	71	3220	1	3	TSeries-01302020-1021-023	electrical	1	500	4	0
Scn1a-SST	71	3220	1	3	TSeries-01302020-1021-023	electrical	1	500	5	1	0.526226
Scn1a-SST	71	3220	1	3	TSeries-01302020-1021-023	electrical	1	500	6	1	0.40032
Scn1a-SST	71	3220	1	3	TSeries-01302020-1021-023	electrical	1	500	7	1	1.04986
Scn1a-SST	71	3220	1	3	TSeries-01302020-1021-023	electrical	1	500	8	0
Scn1a-SST	71	3220	1	3	TSeries-01302020-1021-023	electrical	1	500	9	0
Scn1a-SST	71	3220	1	3	TSeries-01302020-1021-023	electrical	1	500	10	0
Scn1a-SST	71	3220	1	3	TSeries-01302020-1021-023	electrical	1	500	11	0
Scn1a-SST	71	3220	1	3	TSeries-01302020-1021-023	electrical	1	500	12	1	0.541381
Scn1a-SST	71	3220	1	3	TSeries-01302020-1021-023	electrical	1	500	13	1	0.707815
Scn1a-SST	71	3220	1	3	TSeries-01302020-1021-023	electrical	1	500	14	1	0.206052
Scn1a-SST	71	3220	1	3	TSeries-01302020-1021-023	electrical	1	500	15	1	1.18265
Scn1a-SST	71	3220	1	3	TSeries-01302020-1021-023	electrical	1	500	16	1	0.386675
Scn1a-SST	71	3220	1	3	TSeries-01302020-1021-023	electrical	1	500	17	1	0.371924
Scn1a-SST	71	3220	1	3	TSeries-01302020-1021-023	electrical	1	500	18	1	0.507719
Scn1a-SST	71	3220	1	3	TSeries-01302020-1021-023	electrical	1	500	19	1	0.601565
Scn1a-SST	71	3220	1	3	TSeries-01302020-1021-023	electrical	1	500	20	1	0.651528
Scn1a-SST	71	3220	1	3	TSeries-01302020-1021-023	electrical	1	500	21	1	0.553294
Scn1a-SST	71	3220	1	3	TSeries-01302020-1021-023	electrical	1	500	22	1	0.422569
Scn1a-SST	71	3220	1	3	TSeries-01302020-1021-023	electrical	1	500	23	0
Scn1a-SST	71	3220	1	3	TSeries-01302020-1021-023	electrical	1	500	24	1	0.352293
Scn1a-SST	71	3220	1	3	TSeries-01302020-1021-023	electrical	1	500	25	1	1.11124
Scn1a-SST	71	3220	1	3	TSeries-01302020-1021-023	electrical	1	500	26	1	0.926217
Scn1a-SST	71	3220	1	3	TSeries-01302020-1021-023	electrical	1	500	27	1	0.406356
Scn1a-SST	71	3220	1	3	TSeries-01302020-1021-023	electrical	1	500	28	1	0.491207
Scn1a-SST	71	3220	1	3	TSeries-01302020-1021-024	opto alone control	1	500	0	0
Scn1a-SST	71	3220	1	3	TSeries-01302020-1021-024	opto alone control	1	500	1	0
Scn1a-SST	71	3220	1	3	TSeries-01302020-1021-024	opto alone control	1	500	2	0
Scn1a-SST	71	3220	1	3	TSeries-01302020-1021-024	opto alone control	1	500	3	0
Scn1a-SST	71	3220	1	3	TSeries-01302020-1021-024	opto alone control	1	500	4	0
Scn1a-SST	71	3220	1	3	TSeries-01302020-1021-024	opto alone control	1	500	5	0
Scn1a-SST	71	3220	1	3	TSeries-01302020-1021-024	opto alone control	1	500	6	0
Scn1a-SST	71	3220	1	3	TSeries-01302020-1021-024	opto alone control	1	500	7	0
Scn1a-SST	71	3220	1	3	TSeries-01302020-1021-024	opto alone control	1	500	8	0
Scn1a-SST	71	3220	1	3	TSeries-01302020-1021-024	opto alone control	1	500	9	0
Scn1a-SST	71	3220	1	3	TSeries-01302020-1021-024	opto alone control	1	500	10	0
Scn1a-SST	71	3220	1	3	TSeries-01302020-1021-024	opto alone control	1	500	11	0
Scn1a-SST	71	3220	1	3	TSeries-01302020-1021-024	opto alone control	1	500	12	0
Scn1a-SST	71	3220	1	3	TSeries-01302020-1021-024	opto alone control	1	500	13	0
Scn1a-SST	71	3220	1	3	TSeries-01302020-1021-024	opto alone control	1	500	14	0
Scn1a-SST	71	3220	1	3	TSeries-01302020-1021-024	opto alone control	1	500	15	0
Scn1a-SST	71	3220	1	3	TSeries-01302020-1021-024	opto alone control	1	500	16	0
Scn1a-SST	71	3220	1	3	TSeries-01302020-1021-024	opto alone control	1	500	17	0
Scn1a-SST	71	3220	1	3	TSeries-01302020-1021-024	opto alone control	1	500	18	0
Scn1a-SST	71	3220	1	3	TSeries-01302020-1021-024	opto alone control	1	500	19	0
Scn1a-SST	71	3220	1	3	TSeries-01302020-1021-024	opto alone control	1	500	20	0
Scn1a-SST	71	3220	1	3	TSeries-01302020-1021-024	opto alone control	1	500	21	0
Scn1a-SST	71	3220	1	3	TSeries-01302020-1021-024	opto alone control	1	500	22	0
Scn1a-SST	71	3220	1	3	TSeries-01302020-1021-024	opto alone control	1	500	23	0
Scn1a-SST	71	3220	1	3	TSeries-01302020-1021-024	opto alone control	1	500	24	0
Scn1a-SST	71	3220	1	3	TSeries-01302020-1021-024	opto alone control	1	500	25	0
Scn1a-SST	71	3220	1	3	TSeries-01302020-1021-024	opto alone control	1	500	26	0
Scn1a-SST	71	3220	1	3	TSeries-01302020-1021-024	opto alone control	1	500	27	0
Scn1a-SST	71	3220	1	3	TSeries-01302020-1021-024	opto alone control	1	500	28	0
Scn1a-SST	71	3220	1	3	TSeries-01302020-1021-028	electrical + opto	1	500	0	1	0.420262
Scn1a-SST	71	3220	1	3	TSeries-01302020-1021-028	electrical + opto	1	500	1	0
Scn1a-SST	71	3220	1	3	TSeries-01302020-1021-028	electrical + opto	1	500	2	1	0.540593
Scn1a-SST	71	3220	1	3	TSeries-01302020-1021-028	electrical + opto	1	500	3	0
Scn1a-SST	71	3220	1	3	TSeries-01302020-1021-028	electrical + opto	1	500	4	0
Scn1a-SST	71	3220	1	3	TSeries-01302020-1021-028	electrical + opto	1	500	5	0
Scn1a-SST	71	3220	1	3	TSeries-01302020-1021-028	electrical + opto	1	500	6	1	0.304718
Scn1a-SST	71	3220	1	3	TSeries-01302020-1021-028	electrical + opto	1	500	7	0
Scn1a-SST	71	3220	1	3	TSeries-01302020-1021-028	electrical + opto	1	500	8	1	0.227919
Scn1a-SST	71	3220	1	3	TSeries-01302020-1021-028	electrical + opto	1	500	9	0
Scn1a-SST	71	3220	1	3	TSeries-01302020-1021-028	electrical + opto	1	500	10	0
Scn1a-SST	71	3220	1	3	TSeries-01302020-1021-028	electrical + opto	1	500	11	0
Scn1a-SST	71	3220	1	3	TSeries-01302020-1021-028	electrical + opto	1	500	12	1	0.533006
Scn1a-SST	71	3220	1	3	TSeries-01302020-1021-028	electrical + opto	1	500	13	0
Scn1a-SST	71	3220	1	3	TSeries-01302020-1021-028	electrical + opto	1	500	14	1	0.177218
Scn1a-SST	71	3220	1	3	TSeries-01302020-1021-028	electrical + opto	1	500	15	1	0.968703
Scn1a-SST	71	3220	1	3	TSeries-01302020-1021-028	electrical + opto	1	500	16	1	0.473564
Scn1a-SST	71	3220	1	3	TSeries-01302020-1021-028	electrical + opto	1	500	17	0
Scn1a-SST	71	3220	1	3	TSeries-01302020-1021-028	electrical + opto	1	500	18	1	0.386249
Scn1a-SST	71	3220	1	3	TSeries-01302020-1021-028	electrical + opto	1	500	19	1	0.697446
Scn1a-SST	71	3220	1	3	TSeries-01302020-1021-028	electrical + opto	1	500	20	0
Scn1a-SST	71	3220	1	3	TSeries-01302020-1021-028	electrical + opto	1	500	21	1	0.652812
Scn1a-SST	71	3220	1	3	TSeries-01302020-1021-028	electrical + opto	1	500	22	1	0.475474
Scn1a-SST	71	3220	1	3	TSeries-01302020-1021-028	electrical + opto	1	500	23	0
Scn1a-SST	71	3220	1	3	TSeries-01302020-1021-028	electrical + opto	1	500	24	1	0.450299
Scn1a-SST	71	3220	1	3	TSeries-01302020-1021-028	electrical + opto	1	500	25	1	1.14077
Scn1a-SST	71	3220	1	3	TSeries-01302020-1021-028	electrical + opto	1	500	26	1	0.387386
Scn1a-SST	71	3220	1	3	TSeries-01302020-1021-028	electrical + opto	1	500	27	1	0.453254
Scn1a-SST	71	3220	1	3	TSeries-01302020-1021-028	electrical + opto	1	500	28	1	0.450414
Scn1a-SST	71	3220	2	5	TSeries-01302020-1021-046	electrical	1	500	0	1	0.596163
Scn1a-SST	71	3220	2	5	TSeries-01302020-1021-046	electrical	1	500	1	1	0.518808
Scn1a-SST	71	3220	2	5	TSeries-01302020-1021-046	electrical	1	500	2	1	0.541765
Scn1a-SST	71	3220	2	5	TSeries-01302020-1021-046	electrical	1	500	3	1	0.200386
Scn1a-SST	71	3220	2	5	TSeries-01302020-1021-046	electrical	1	500	4	0
Scn1a-SST	71	3220	2	5	TSeries-01302020-1021-046	electrical	1	500	5	1	0.516936
Scn1a-SST	71	3220	2	5	TSeries-01302020-1021-046	electrical	1	500	6	1	0.555093
Scn1a-SST	71	3220	2	5	TSeries-01302020-1021-046	electrical	1	500	7	1	0.414832
Scn1a-SST	71	3220	2	5	TSeries-01302020-1021-046	electrical	1	500	8	1	0.486871
Scn1a-SST	71	3220	2	5	TSeries-01302020-1021-046	electrical	1	500	9	0
Scn1a-SST	71	3220	2	5	TSeries-01302020-1021-046	electrical	1	500	10	1	0.230047
Scn1a-SST	71	3220	2	5	TSeries-01302020-1021-046	electrical	1	500	11	0
Scn1a-SST	71	3220	2	5	TSeries-01302020-1021-046	electrical	1	500	12	1	0.481387
Scn1a-SST	71	3220	2	5	TSeries-01302020-1021-046	electrical	1	500	13	1	0.302332
Scn1a-SST	71	3220	2	5	TSeries-01302020-1021-046	electrical	1	500	14	1	0.433761
Scn1a-SST	71	3220	2	5	TSeries-01302020-1021-046	electrical	1	500	15	1	0.431554
Scn1a-SST	71	3220	2	5	TSeries-01302020-1021-046	electrical	1	500	16	0
Scn1a-SST	71	3220	2	5	TSeries-01302020-1021-046	electrical	1	500	17	1	0.375329
Scn1a-SST	71	3220	2	5	TSeries-01302020-1021-046	electrical	1	500	18	0
Scn1a-SST	71	3220	2	5	TSeries-01302020-1021-046	electrical	1	500	19	1	0.219873
Scn1a-SST	71	3220	2	5	TSeries-01302020-1021-046	electrical	1	500	20	1	0.402831
Scn1a-SST	71	3220	2	5	TSeries-01302020-1021-046	electrical	1	500	21	1	0.2579
Scn1a-SST	71	3220	2	5	TSeries-01302020-1021-046	electrical	1	500	22	0
Scn1a-SST	71	3220	2	5	TSeries-01302020-1021-046	electrical	1	500	23	1	0.417281
Scn1a-SST	71	3220	2	5	TSeries-01302020-1021-046	electrical	1	500	24	1	0.172291
Scn1a-SST	71	3220	2	5	TSeries-01302020-1021-046	electrical	1	500	25	1	0.235225
Scn1a-SST	71	3220	2	5	TSeries-01302020-1021-046	electrical	1	500	26	0
Scn1a-SST	71	3220	2	5	TSeries-01302020-1021-046	electrical	1	500	27	0
Scn1a-SST	71	3220	2	5	TSeries-01302020-1021-046	electrical	1	500	28	1	0.250901
Scn1a-SST	71	3220	2	5	TSeries-01302020-1021-046	electrical	1	500	29	0
Scn1a-SST	71	3220	2	5	TSeries-01302020-1021-046	electrical	1	500	30	0
Scn1a-SST	71	3220	2	5	TSeries-01302020-1021-046	electrical	1	500	31	0
Scn1a-SST	71	3220	2	5	TSeries-01302020-1021-046	electrical	1	500	32	1	0.181568
Scn1a-SST	71	3220	2	5	TSeries-01302020-1021-046	electrical	1	500	33	0
Scn1a-SST	71	3220	2	5	TSeries-01302020-1021-046	electrical	1	500	34	1	0.323757
Scn1a-SST	71	3220	2	5	TSeries-01302020-1021-046	electrical	1	500	35	0
Scn1a-SST	71	3220	2	5	TSeries-01302020-1021-046	electrical	1	500	36	0
Scn1a-SST	71	3220	2	5	TSeries-01302020-1021-046	electrical	1	500	37	1	0.342794
Scn1a-SST	71	3220	2	5	TSeries-01302020-1021-046	electrical	1	500	38	1	0.347416
Scn1a-SST	71	3220	2	5	TSeries-01302020-1021-046	electrical	1	500	39	0
Scn1a-SST	71	3220	2	5	TSeries-01302020-1021-046	electrical	1	500	40	0
Scn1a-SST	71	3220	2	5	TSeries-01302020-1021-046	electrical	1	500	41	1	0.285714
Scn1a-SST	71	3220	2	5	TSeries-01302020-1021-046	electrical	1	500	42	1	0.33371
Scn1a-SST	71	3220	2	5	TSeries-01302020-1021-046	electrical	1	500	43	1	0.292789
Scn1a-SST	71	3220	2	5	TSeries-01302020-1021-046	electrical	1	500	44	1	0.36554
Scn1a-SST	71	3220	2	5	TSeries-01302020-1021-046	electrical	1	500	45	1	0.515532
Scn1a-SST	71	3220	2	5	TSeries-01302020-1021-047	opto alone control	1	500	0	0
Scn1a-SST	71	3220	2	5	TSeries-01302020-1021-047	opto alone control	1	500	1	0
Scn1a-SST	71	3220	2	5	TSeries-01302020-1021-047	opto alone control	1	500	2	0
Scn1a-SST	71	3220	2	5	TSeries-01302020-1021-047	opto alone control	1	500	3	0
Scn1a-SST	71	3220	2	5	TSeries-01302020-1021-047	opto alone control	1	500	4	0
Scn1a-SST	71	3220	2	5	TSeries-01302020-1021-047	opto alone control	1	500	5	0
Scn1a-SST	71	3220	2	5	TSeries-01302020-1021-047	opto alone control	1	500	6	0
Scn1a-SST	71	3220	2	5	TSeries-01302020-1021-047	opto alone control	1	500	7	0
Scn1a-SST	71	3220	2	5	TSeries-01302020-1021-047	opto alone control	1	500	8	0
Scn1a-SST	71	3220	2	5	TSeries-01302020-1021-047	opto alone control	1	500	9	0
Scn1a-SST	71	3220	2	5	TSeries-01302020-1021-047	opto alone control	1	500	10	0
Scn1a-SST	71	3220	2	5	TSeries-01302020-1021-047	opto alone control	1	500	11	0
Scn1a-SST	71	3220	2	5	TSeries-01302020-1021-047	opto alone control	1	500	12	0
Scn1a-SST	71	3220	2	5	TSeries-01302020-1021-047	opto alone control	1	500	13	0
Scn1a-SST	71	3220	2	5	TSeries-01302020-1021-047	opto alone control	1	500	14	0
Scn1a-SST	71	3220	2	5	TSeries-01302020-1021-047	opto alone control	1	500	15	0
Scn1a-SST	71	3220	2	5	TSeries-01302020-1021-047	opto alone control	1	500	16	0
Scn1a-SST	71	3220	2	5	TSeries-01302020-1021-047	opto alone control	1	500	17	0
Scn1a-SST	71	3220	2	5	TSeries-01302020-1021-047	opto alone control	1	500	18	0
Scn1a-SST	71	3220	2	5	TSeries-01302020-1021-047	opto alone control	1	500	19	0
Scn1a-SST	71	3220	2	5	TSeries-01302020-1021-047	opto alone control	1	500	20	0
Scn1a-SST	71	3220	2	5	TSeries-01302020-1021-047	opto alone control	1	500	21	0
Scn1a-SST	71	3220	2	5	TSeries-01302020-1021-047	opto alone control	1	500	22	0
Scn1a-SST	71	3220	2	5	TSeries-01302020-1021-047	opto alone control	1	500	23	0
Scn1a-SST	71	3220	2	5	TSeries-01302020-1021-047	opto alone control	1	500	24	0
Scn1a-SST	71	3220	2	5	TSeries-01302020-1021-047	opto alone control	1	500	25	0
Scn1a-SST	71	3220	2	5	TSeries-01302020-1021-047	opto alone control	1	500	26	0
Scn1a-SST	71	3220	2	5	TSeries-01302020-1021-047	opto alone control	1	500	27	0
Scn1a-SST	71	3220	2	5	TSeries-01302020-1021-047	opto alone control	1	500	28	0
Scn1a-SST	71	3220	2	5	TSeries-01302020-1021-047	opto alone control	1	500	29	0
Scn1a-SST	71	3220	2	5	TSeries-01302020-1021-047	opto alone control	1	500	30	0
Scn1a-SST	71	3220	2	5	TSeries-01302020-1021-047	opto alone control	1	500	31	0
Scn1a-SST	71	3220	2	5	TSeries-01302020-1021-047	opto alone control	1	500	32	0
Scn1a-SST	71	3220	2	5	TSeries-01302020-1021-047	opto alone control	1	500	33	0
Scn1a-SST	71	3220	2	5	TSeries-01302020-1021-047	opto alone control	1	500	34	0
Scn1a-SST	71	3220	2	5	TSeries-01302020-1021-047	opto alone control	1	500	35	0
Scn1a-SST	71	3220	2	5	TSeries-01302020-1021-047	opto alone control	1	500	36	0
Scn1a-SST	71	3220	2	5	TSeries-01302020-1021-047	opto alone control	1	500	37	0
Scn1a-SST	71	3220	2	5	TSeries-01302020-1021-047	opto alone control	1	500	38	0
Scn1a-SST	71	3220	2	5	TSeries-01302020-1021-047	opto alone control	1	500	39	0
Scn1a-SST	71	3220	2	5	TSeries-01302020-1021-047	opto alone control	1	500	40	0
Scn1a-SST	71	3220	2	5	TSeries-01302020-1021-047	opto alone control	1	500	41	0
Scn1a-SST	71	3220	2	5	TSeries-01302020-1021-047	opto alone control	1	500	42	0
Scn1a-SST	71	3220	2	5	TSeries-01302020-1021-047	opto alone control	1	500	43	0
Scn1a-SST	71	3220	2	5	TSeries-01302020-1021-047	opto alone control	1	500	44	0
Scn1a-SST	71	3220	2	5	TSeries-01302020-1021-047	opto alone control	1	500	45	0
Scn1a-SST	71	3220	2	5	TSeries-01302020-1021-051	electrical + opto	1	500	0	0
Scn1a-SST	71	3220	2	5	TSeries-01302020-1021-051	electrical + opto	1	500	1	1	0.43655
Scn1a-SST	71	3220	2	5	TSeries-01302020-1021-051	electrical + opto	1	500	2	1	0.459226
Scn1a-SST	71	3220	2	5	TSeries-01302020-1021-051	electrical + opto	1	500	3	1	0.167788
Scn1a-SST	71	3220	2	5	TSeries-01302020-1021-051	electrical + opto	1	500	4	0
Scn1a-SST	71	3220	2	5	TSeries-01302020-1021-051	electrical + opto	1	500	5	0
Scn1a-SST	71	3220	2	5	TSeries-01302020-1021-051	electrical + opto	1	500	6	0
Scn1a-SST	71	3220	2	5	TSeries-01302020-1021-051	electrical + opto	1	500	7	1	0.695822
Scn1a-SST	71	3220	2	5	TSeries-01302020-1021-051	electrical + opto	1	500	8	1	0.245218
Scn1a-SST	71	3220	2	5	TSeries-01302020-1021-051	electrical + opto	1	500	9	0
Scn1a-SST	71	3220	2	5	TSeries-01302020-1021-051	electrical + opto	1	500	10	0
Scn1a-SST	71	3220	2	5	TSeries-01302020-1021-051	electrical + opto	1	500	11	0
Scn1a-SST	71	3220	2	5	TSeries-01302020-1021-051	electrical + opto	1	500	12	0
Scn1a-SST	71	3220	2	5	TSeries-01302020-1021-051	electrical + opto	1	500	13	0
Scn1a-SST	71	3220	2	5	TSeries-01302020-1021-051	electrical + opto	1	500	14	0
Scn1a-SST	71	3220	2	5	TSeries-01302020-1021-051	electrical + opto	1	500	15	0
Scn1a-SST	71	3220	2	5	TSeries-01302020-1021-051	electrical + opto	1	500	16	0
Scn1a-SST	71	3220	2	5	TSeries-01302020-1021-051	electrical + opto	1	500	17	1	0.407825
Scn1a-SST	71	3220	2	5	TSeries-01302020-1021-051	electrical + opto	1	500	18	0
Scn1a-SST	71	3220	2	5	TSeries-01302020-1021-051	electrical + opto	1	500	19	0
Scn1a-SST	71	3220	2	5	TSeries-01302020-1021-051	electrical + opto	1	500	20	0
Scn1a-SST	71	3220	2	5	TSeries-01302020-1021-051	electrical + opto	1	500	21	0
Scn1a-SST	71	3220	2	5	TSeries-01302020-1021-051	electrical + opto	1	500	22	0
Scn1a-SST	71	3220	2	5	TSeries-01302020-1021-051	electrical + opto	1	500	23	0
Scn1a-SST	71	3220	2	5	TSeries-01302020-1021-051	electrical + opto	1	500	24	0
Scn1a-SST	71	3220	2	5	TSeries-01302020-1021-051	electrical + opto	1	500	25	0
Scn1a-SST	71	3220	2	5	TSeries-01302020-1021-051	electrical + opto	1	500	26	0
Scn1a-SST	71	3220	2	5	TSeries-01302020-1021-051	electrical + opto	1	500	27	0
Scn1a-SST	71	3220	2	5	TSeries-01302020-1021-051	electrical + opto	1	500	28	0
Scn1a-SST	71	3220	2	5	TSeries-01302020-1021-051	electrical + opto	1	500	29	0
Scn1a-SST	71	3220	2	5	TSeries-01302020-1021-051	electrical + opto	1	500	30	0
Scn1a-SST	71	3220	2	5	TSeries-01302020-1021-051	electrical + opto	1	500	31	0
Scn1a-SST	71	3220	2	5	TSeries-01302020-1021-051	electrical + opto	1	500	32	0
Scn1a-SST	71	3220	2	5	TSeries-01302020-1021-051	electrical + opto	1	500	33	0
Scn1a-SST	71	3220	2	5	TSeries-01302020-1021-051	electrical + opto	1	500	34	0
Scn1a-SST	71	3220	2	5	TSeries-01302020-1021-051	electrical + opto	1	500	35	0
Scn1a-SST	71	3220	2	5	TSeries-01302020-1021-051	electrical + opto	1	500	36	0
Scn1a-SST	71	3220	2	5	TSeries-01302020-1021-051	electrical + opto	1	500	37	0
Scn1a-SST	71	3220	2	5	TSeries-01302020-1021-051	electrical + opto	1	500	38	0
Scn1a-SST	71	3220	2	5	TSeries-01302020-1021-051	electrical + opto	1	500	39	0
Scn1a-SST	71	3220	2	5	TSeries-01302020-1021-051	electrical + opto	1	500	40	0
Scn1a-SST	71	3220	2	5	TSeries-01302020-1021-051	electrical + opto	1	500	41	0
Scn1a-SST	71	3220	2	5	TSeries-01302020-1021-051	electrical + opto	1	500	42	0
Scn1a-SST	71	3220	2	5	TSeries-01302020-1021-051	electrical + opto	1	500	43	0
Scn1a-SST	71	3220	2	5	TSeries-01302020-1021-051	electrical + opto	1	500	44	1	0.323809
Scn1a-SST	71	3220	2	5	TSeries-01302020-1021-051	electrical + opto	1	500	45	1	0.418204
Scn1a-SST	71	3220	2	6	TSeries-01302020-1021-057	electrical	1	500	0	0
Scn1a-SST	71	3220	2	6	TSeries-01302020-1021-057	electrical	1	500	1	0
Scn1a-SST	71	3220	2	6	TSeries-01302020-1021-057	electrical	1	500	2	1	0.368685
Scn1a-SST	71	3220	2	6	TSeries-01302020-1021-057	electrical	1	500	3	1	0.350732
Scn1a-SST	71	3220	2	6	TSeries-01302020-1021-057	electrical	1	500	4	1	0.598198
Scn1a-SST	71	3220	2	6	TSeries-01302020-1021-057	electrical	1	500	5	1	0.832156
Scn1a-SST	71	3220	2	6	TSeries-01302020-1021-057	electrical	1	500	6	1	0.488817
Scn1a-SST	71	3220	2	6	TSeries-01302020-1021-057	electrical	1	500	7	1	0.176772
Scn1a-SST	71	3220	2	6	TSeries-01302020-1021-057	electrical	1	500	8	1	0.160046
Scn1a-SST	71	3220	2	6	TSeries-01302020-1021-057	electrical	1	500	9	1	0.517048
Scn1a-SST	71	3220	2	6	TSeries-01302020-1021-057	electrical	1	500	10	1	0.889791
Scn1a-SST	71	3220	2	6	TSeries-01302020-1021-057	electrical	1	500	11	1	0.155592
Scn1a-SST	71	3220	2	6	TSeries-01302020-1021-057	electrical	1	500	12	1	0.513424
Scn1a-SST	71	3220	2	6	TSeries-01302020-1021-057	electrical	1	500	13	1	0.670926
Scn1a-SST	71	3220	2	6	TSeries-01302020-1021-057	electrical	1	500	14	1	0.309741
Scn1a-SST	71	3220	2	6	TSeries-01302020-1021-057	electrical	1	500	15	1	0.696035
Scn1a-SST	71	3220	2	6	TSeries-01302020-1021-057	electrical	1	500	16	1	0.473306
Scn1a-SST	71	3220	2	6	TSeries-01302020-1021-057	electrical	1	500	17	1	0.61189
Scn1a-SST	71	3220	2	6	TSeries-01302020-1021-057	electrical	1	500	18	1	0.37145
Scn1a-SST	71	3220	2	6	TSeries-01302020-1021-057	electrical	1	500	19	1	0.466072
Scn1a-SST	71	3220	2	6	TSeries-01302020-1021-057	electrical	1	500	20	1	0.552241
Scn1a-SST	71	3220	2	6	TSeries-01302020-1021-057	electrical	1	500	21	1	0.395621
Scn1a-SST	71	3220	2	6	TSeries-01302020-1021-057	electrical	1	500	22	1	0.465228
Scn1a-SST	71	3220	2	6	TSeries-01302020-1021-057	electrical	1	500	23	1	0.570149
Scn1a-SST	71	3220	2	6	TSeries-01302020-1021-057	electrical	1	500	24	1	0.626896
Scn1a-SST	71	3220	2	6	TSeries-01302020-1021-057	electrical	1	500	25	1	0.984129
Scn1a-SST	71	3220	2	6	TSeries-01302020-1021-057	electrical	1	500	26	1	0.611321
Scn1a-SST	71	3220	2	6	TSeries-01302020-1021-057	electrical	1	500	27	1	0.451663
Scn1a-SST	71	3220	2	6	TSeries-01302020-1021-057	electrical	1	500	28	1	0.398895
Scn1a-SST	71	3220	2	6	TSeries-01302020-1021-057	electrical	1	500	29	1	0.366544
Scn1a-SST	71	3220	2	6	TSeries-01302020-1021-057	electrical	1	500	30	1	0.554198
Scn1a-SST	71	3220	2	6	TSeries-01302020-1021-058	opto alone control	1	500	0	0
Scn1a-SST	71	3220	2	6	TSeries-01302020-1021-058	opto alone control	1	500	1	0
Scn1a-SST	71	3220	2	6	TSeries-01302020-1021-058	opto alone control	1	500	2	0
Scn1a-SST	71	3220	2	6	TSeries-01302020-1021-058	opto alone control	1	500	3	0
Scn1a-SST	71	3220	2	6	TSeries-01302020-1021-058	opto alone control	1	500	4	0
Scn1a-SST	71	3220	2	6	TSeries-01302020-1021-058	opto alone control	1	500	5	0
Scn1a-SST	71	3220	2	6	TSeries-01302020-1021-058	opto alone control	1	500	6	0
Scn1a-SST	71	3220	2	6	TSeries-01302020-1021-058	opto alone control	1	500	7	0
Scn1a-SST	71	3220	2	6	TSeries-01302020-1021-058	opto alone control	1	500	8	0
Scn1a-SST	71	3220	2	6	TSeries-01302020-1021-058	opto alone control	1	500	9	0
Scn1a-SST	71	3220	2	6	TSeries-01302020-1021-058	opto alone control	1	500	10	0
Scn1a-SST	71	3220	2	6	TSeries-01302020-1021-058	opto alone control	1	500	11	0
Scn1a-SST	71	3220	2	6	TSeries-01302020-1021-058	opto alone control	1	500	12	0
Scn1a-SST	71	3220	2	6	TSeries-01302020-1021-058	opto alone control	1	500	13	0
Scn1a-SST	71	3220	2	6	TSeries-01302020-1021-058	opto alone control	1	500	14	0
Scn1a-SST	71	3220	2	6	TSeries-01302020-1021-058	opto alone control	1	500	15	0
Scn1a-SST	71	3220	2	6	TSeries-01302020-1021-058	opto alone control	1	500	16	0
Scn1a-SST	71	3220	2	6	TSeries-01302020-1021-058	opto alone control	1	500	17	0
Scn1a-SST	71	3220	2	6	TSeries-01302020-1021-058	opto alone control	1	500	18	0
Scn1a-SST	71	3220	2	6	TSeries-01302020-1021-058	opto alone control	1	500	19	0
Scn1a-SST	71	3220	2	6	TSeries-01302020-1021-058	opto alone control	1	500	20	0
Scn1a-SST	71	3220	2	6	TSeries-01302020-1021-058	opto alone control	1	500	21	0
Scn1a-SST	71	3220	2	6	TSeries-01302020-1021-058	opto alone control	1	500	22	0
Scn1a-SST	71	3220	2	6	TSeries-01302020-1021-058	opto alone control	1	500	23	0
Scn1a-SST	71	3220	2	6	TSeries-01302020-1021-058	opto alone control	1	500	24	0
Scn1a-SST	71	3220	2	6	TSeries-01302020-1021-058	opto alone control	1	500	25	0
Scn1a-SST	71	3220	2	6	TSeries-01302020-1021-058	opto alone control	1	500	26	0
Scn1a-SST	71	3220	2	6	TSeries-01302020-1021-058	opto alone control	1	500	27	0
Scn1a-SST	71	3220	2	6	TSeries-01302020-1021-058	opto alone control	1	500	28	0
Scn1a-SST	71	3220	2	6	TSeries-01302020-1021-058	opto alone control	1	500	29	0
Scn1a-SST	71	3220	2	6	TSeries-01302020-1021-058	opto alone control	1	500	30	0
Scn1a-SST	71	3220	2	6	TSeries-01302020-1021-062	electrical + opto	1	500	0	0
Scn1a-SST	71	3220	2	6	TSeries-01302020-1021-062	electrical + opto	1	500	1	1	0.10533
Scn1a-SST	71	3220	2	6	TSeries-01302020-1021-062	electrical + opto	1	500	2	1	0.197298
Scn1a-SST	71	3220	2	6	TSeries-01302020-1021-062	electrical + opto	1	500	3	1	0.367886
Scn1a-SST	71	3220	2	6	TSeries-01302020-1021-062	electrical + opto	1	500	4	1	0.16967
Scn1a-SST	71	3220	2	6	TSeries-01302020-1021-062	electrical + opto	1	500	5	1	0.528601
Scn1a-SST	71	3220	2	6	TSeries-01302020-1021-062	electrical + opto	1	500	6	1	0.41183
Scn1a-SST	71	3220	2	6	TSeries-01302020-1021-062	electrical + opto	1	500	7	1	0.190406
Scn1a-SST	71	3220	2	6	TSeries-01302020-1021-062	electrical + opto	1	500	8	1	0.306969
Scn1a-SST	71	3220	2	6	TSeries-01302020-1021-062	electrical + opto	1	500	9	1	0.383997
Scn1a-SST	71	3220	2	6	TSeries-01302020-1021-062	electrical + opto	1	500	10	1	0.163817
Scn1a-SST	71	3220	2	6	TSeries-01302020-1021-062	electrical + opto	1	500	11	1	0.0994573
Scn1a-SST	71	3220	2	6	TSeries-01302020-1021-062	electrical + opto	1	500	12	1	0.322451
Scn1a-SST	71	3220	2	6	TSeries-01302020-1021-062	electrical + opto	1	500	13	1	0.607142
Scn1a-SST	71	3220	2	6	TSeries-01302020-1021-062	electrical + opto	1	500	14	1	0.346064
Scn1a-SST	71	3220	2	6	TSeries-01302020-1021-062	electrical + opto	1	500	15	1	0.762294
Scn1a-SST	71	3220	2	6	TSeries-01302020-1021-062	electrical + opto	1	500	16	1	0.64335
Scn1a-SST	71	3220	2	6	TSeries-01302020-1021-062	electrical + opto	1	500	17	1	0.378835
Scn1a-SST	71	3220	2	6	TSeries-01302020-1021-062	electrical + opto	1	500	18	1	0.378489
Scn1a-SST	71	3220	2	6	TSeries-01302020-1021-062	electrical + opto	1	500	19	1	0.324891
Scn1a-SST	71	3220	2	6	TSeries-01302020-1021-062	electrical + opto	1	500	20	1	0.414497
Scn1a-SST	71	3220	2	6	TSeries-01302020-1021-062	electrical + opto	1	500	21	1	0.273099
Scn1a-SST	71	3220	2	6	TSeries-01302020-1021-062	electrical + opto	1	500	22	1	0.408965
Scn1a-SST	71	3220	2	6	TSeries-01302020-1021-062	electrical + opto	1	500	23	1	0.437023
Scn1a-SST	71	3220	2	6	TSeries-01302020-1021-062	electrical + opto	1	500	24	1	0.422426
Scn1a-SST	71	3220	2	6	TSeries-01302020-1021-062	electrical + opto	1	500	25	1	0.62119
Scn1a-SST	71	3220	2	6	TSeries-01302020-1021-062	electrical + opto	1	500	26	1	0.403873
Scn1a-SST	71	3220	2	6	TSeries-01302020-1021-062	electrical + opto	1	500	27	1	0.39621
Scn1a-SST	71	3220	2	6	TSeries-01302020-1021-062	electrical + opto	1	500	28	1	0.261097
Scn1a-SST	71	3220	2	6	TSeries-01302020-1021-062	electrical + opto	1	500	29	1	0.30558
Scn1a-SST	71	3220	2	6	TSeries-01302020-1021-062	electrical + opto	1	500	30	1	0.322013
Scn1a-SST	71	3220	3	7	TSeries-01302020-1021-068	electrical	1	500	0	1	0.264631
Scn1a-SST	71	3220	3	7	TSeries-01302020-1021-068	electrical	1	500	1	1	0.246016
Scn1a-SST	71	3220	3	7	TSeries-01302020-1021-068	electrical	1	500	2	1	1.41807
Scn1a-SST	71	3220	3	7	TSeries-01302020-1021-068	electrical	1	500	3	1	0.438421
Scn1a-SST	71	3220	3	7	TSeries-01302020-1021-068	electrical	1	500	4	1	0.380581
Scn1a-SST	71	3220	3	7	TSeries-01302020-1021-068	electrical	1	500	5	1	0.606324
Scn1a-SST	71	3220	3	7	TSeries-01302020-1021-068	electrical	1	500	6	1	0.321143
Scn1a-SST	71	3220	3	7	TSeries-01302020-1021-068	electrical	1	500	7	1	0.397633
Scn1a-SST	71	3220	3	7	TSeries-01302020-1021-068	electrical	1	500	8	1	0.230489
Scn1a-SST	71	3220	3	7	TSeries-01302020-1021-068	electrical	1	500	9	1	0.257377
Scn1a-SST	71	3220	3	7	TSeries-01302020-1021-068	electrical	1	500	10	1	1.02059
Scn1a-SST	71	3220	3	7	TSeries-01302020-1021-068	electrical	1	500	11	1	0.958629
Scn1a-SST	71	3220	3	7	TSeries-01302020-1021-068	electrical	1	500	12	1	0.423118
Scn1a-SST	71	3220	3	7	TSeries-01302020-1021-068	electrical	1	500	13	1	0.773312
Scn1a-SST	71	3220	3	7	TSeries-01302020-1021-068	electrical	1	500	14	1	0.474103
Scn1a-SST	71	3220	3	7	TSeries-01302020-1021-068	electrical	1	500	15	1	0.578024
Scn1a-SST	71	3220	3	7	TSeries-01302020-1021-068	electrical	1	500	16	1	0.344905
Scn1a-SST	71	3220	3	7	TSeries-01302020-1021-068	electrical	1	500	17	1	0.321707
Scn1a-SST	71	3220	3	7	TSeries-01302020-1021-068	electrical	1	500	18	0
Scn1a-SST	71	3220	3	7	TSeries-01302020-1021-068	electrical	1	500	19	0
Scn1a-SST	71	3220	3	7	TSeries-01302020-1021-068	electrical	1	500	20	1	0.32567
Scn1a-SST	71	3220	3	7	TSeries-01302020-1021-068	electrical	1	500	21	1	0.330671
Scn1a-SST	71	3220	3	7	TSeries-01302020-1021-068	electrical	1	500	22	1	1.6511
Scn1a-SST	71	3220	3	7	TSeries-01302020-1021-068	electrical	1	500	23	1	0.858231
Scn1a-SST	71	3220	3	7	TSeries-01302020-1021-068	electrical	1	500	24	1	0.314143
Scn1a-SST	71	3220	3	7	TSeries-01302020-1021-068	electrical	1	500	25	1	1.04617
Scn1a-SST	71	3220	3	7	TSeries-01302020-1021-068	electrical	1	500	26	1	0.665934
Scn1a-SST	71	3220	3	7	TSeries-01302020-1021-068	electrical	1	500	27	1	0.708824
Scn1a-SST	71	3220	3	7	TSeries-01302020-1021-068	electrical	1	500	28	1	1.77832
Scn1a-SST	71	3220	3	7	TSeries-01302020-1021-068	electrical	1	500	29	1	0.250337
Scn1a-SST	71	3220	3	7	TSeries-01302020-1021-068	electrical	1	500	30	1	1.84542
Scn1a-SST	71	3220	3	7	TSeries-01302020-1021-068	electrical	1	500	31	1	1.33455
Scn1a-SST	71	3220	3	7	TSeries-01302020-1021-068	electrical	1	500	32	1	0.47027
Scn1a-SST	71	3220	3	7	TSeries-01302020-1021-068	electrical	1	500	33	1	1.36301
Scn1a-SST	71	3220	3	7	TSeries-01302020-1021-068	electrical	1	500	34	1	0.857354
Scn1a-SST	71	3220	3	7	TSeries-01302020-1021-068	electrical	1	500	35	1	0.150854
Scn1a-SST	71	3220	3	7	TSeries-01302020-1021-068	electrical	1	500	36	1	0.229736
Scn1a-SST	71	3220	3	7	TSeries-01302020-1021-068	electrical	1	500	37	1	1.25903
Scn1a-SST	71	3220	3	7	TSeries-01302020-1021-068	electrical	1	500	38	1	0.481211
Scn1a-SST	71	3220	3	7	TSeries-01302020-1021-068	electrical	1	500	39	1	0.588329
Scn1a-SST	71	3220	3	7	TSeries-01302020-1021-068	electrical	1	500	40	1	1.72418
Scn1a-SST	71	3220	3	7	TSeries-01302020-1021-069	opto alone control	1	500	0	0
Scn1a-SST	71	3220	3	7	TSeries-01302020-1021-069	opto alone control	1	500	1	0
Scn1a-SST	71	3220	3	7	TSeries-01302020-1021-069	opto alone control	1	500	2	0
Scn1a-SST	71	3220	3	7	TSeries-01302020-1021-069	opto alone control	1	500	3	0
Scn1a-SST	71	3220	3	7	TSeries-01302020-1021-069	opto alone control	1	500	4	0
Scn1a-SST	71	3220	3	7	TSeries-01302020-1021-069	opto alone control	1	500	5	0
Scn1a-SST	71	3220	3	7	TSeries-01302020-1021-069	opto alone control	1	500	6	0
Scn1a-SST	71	3220	3	7	TSeries-01302020-1021-069	opto alone control	1	500	7	0
Scn1a-SST	71	3220	3	7	TSeries-01302020-1021-069	opto alone control	1	500	8	0
Scn1a-SST	71	3220	3	7	TSeries-01302020-1021-069	opto alone control	1	500	9	0
Scn1a-SST	71	3220	3	7	TSeries-01302020-1021-069	opto alone control	1	500	10	0
Scn1a-SST	71	3220	3	7	TSeries-01302020-1021-069	opto alone control	1	500	11	0
Scn1a-SST	71	3220	3	7	TSeries-01302020-1021-069	opto alone control	1	500	12	0
Scn1a-SST	71	3220	3	7	TSeries-01302020-1021-069	opto alone control	1	500	13	0
Scn1a-SST	71	3220	3	7	TSeries-01302020-1021-069	opto alone control	1	500	14	0
Scn1a-SST	71	3220	3	7	TSeries-01302020-1021-069	opto alone control	1	500	15	0
Scn1a-SST	71	3220	3	7	TSeries-01302020-1021-069	opto alone control	1	500	16	0
Scn1a-SST	71	3220	3	7	TSeries-01302020-1021-069	opto alone control	1	500	17	0
Scn1a-SST	71	3220	3	7	TSeries-01302020-1021-069	opto alone control	1	500	18	0
Scn1a-SST	71	3220	3	7	TSeries-01302020-1021-069	opto alone control	1	500	19	0
Scn1a-SST	71	3220	3	7	TSeries-01302020-1021-069	opto alone control	1	500	20	0
Scn1a-SST	71	3220	3	7	TSeries-01302020-1021-069	opto alone control	1	500	21	0
Scn1a-SST	71	3220	3	7	TSeries-01302020-1021-069	opto alone control	1	500	22	0
Scn1a-SST	71	3220	3	7	TSeries-01302020-1021-069	opto alone control	1	500	23	0
Scn1a-SST	71	3220	3	7	TSeries-01302020-1021-069	opto alone control	1	500	24	0
Scn1a-SST	71	3220	3	7	TSeries-01302020-1021-069	opto alone control	1	500	25	0
Scn1a-SST	71	3220	3	7	TSeries-01302020-1021-069	opto alone control	1	500	26	0
Scn1a-SST	71	3220	3	7	TSeries-01302020-1021-069	opto alone control	1	500	27	0
Scn1a-SST	71	3220	3	7	TSeries-01302020-1021-069	opto alone control	1	500	28	0
Scn1a-SST	71	3220	3	7	TSeries-01302020-1021-069	opto alone control	1	500	29	0
Scn1a-SST	71	3220	3	7	TSeries-01302020-1021-069	opto alone control	1	500	30	0
Scn1a-SST	71	3220	3	7	TSeries-01302020-1021-069	opto alone control	1	500	31	0
Scn1a-SST	71	3220	3	7	TSeries-01302020-1021-069	opto alone control	1	500	32	0
Scn1a-SST	71	3220	3	7	TSeries-01302020-1021-069	opto alone control	1	500	33	0
Scn1a-SST	71	3220	3	7	TSeries-01302020-1021-069	opto alone control	1	500	34	0
Scn1a-SST	71	3220	3	7	TSeries-01302020-1021-069	opto alone control	1	500	35	0
Scn1a-SST	71	3220	3	7	TSeries-01302020-1021-069	opto alone control	1	500	36	0
Scn1a-SST	71	3220	3	7	TSeries-01302020-1021-069	opto alone control	1	500	37	0
Scn1a-SST	71	3220	3	7	TSeries-01302020-1021-069	opto alone control	1	500	38	0
Scn1a-SST	71	3220	3	7	TSeries-01302020-1021-069	opto alone control	1	500	39	0
Scn1a-SST	71	3220	3	7	TSeries-01302020-1021-069	opto alone control	1	500	40	0
Scn1a-SST	71	3220	3	7	TSeries-01302020-1021-073	electrical + opto	1	500	0	0
Scn1a-SST	71	3220	3	7	TSeries-01302020-1021-073	electrical + opto	1	500	1	1	0.0999048
Scn1a-SST	71	3220	3	7	TSeries-01302020-1021-073	electrical + opto	1	500	2	1	0.544846
Scn1a-SST	71	3220	3	7	TSeries-01302020-1021-073	electrical + opto	1	500	3	1	0.23374
Scn1a-SST	71	3220	3	7	TSeries-01302020-1021-073	electrical + opto	1	500	4	1	0.182957
Scn1a-SST	71	3220	3	7	TSeries-01302020-1021-073	electrical + opto	1	500	5	0
Scn1a-SST	71	3220	3	7	TSeries-01302020-1021-073	electrical + opto	1	500	6	0
Scn1a-SST	71	3220	3	7	TSeries-01302020-1021-073	electrical + opto	1	500	7	0
Scn1a-SST	71	3220	3	7	TSeries-01302020-1021-073	electrical + opto	1	500	8	0
Scn1a-SST	71	3220	3	7	TSeries-01302020-1021-073	electrical + opto	1	500	9	0
Scn1a-SST	71	3220	3	7	TSeries-01302020-1021-073	electrical + opto	1	500	10	0
Scn1a-SST	71	3220	3	7	TSeries-01302020-1021-073	electrical + opto	1	500	11	0
Scn1a-SST	71	3220	3	7	TSeries-01302020-1021-073	electrical + opto	1	500	12	0
Scn1a-SST	71	3220	3	7	TSeries-01302020-1021-073	electrical + opto	1	500	13	0
Scn1a-SST	71	3220	3	7	TSeries-01302020-1021-073	electrical + opto	1	500	14	0
Scn1a-SST	71	3220	3	7	TSeries-01302020-1021-073	electrical + opto	1	500	15	0
Scn1a-SST	71	3220	3	7	TSeries-01302020-1021-073	electrical + opto	1	500	16	0
Scn1a-SST	71	3220	3	7	TSeries-01302020-1021-073	electrical + opto	1	500	17	0
Scn1a-SST	71	3220	3	7	TSeries-01302020-1021-073	electrical + opto	1	500	18	0
Scn1a-SST	71	3220	3	7	TSeries-01302020-1021-073	electrical + opto	1	500	19	0
Scn1a-SST	71	3220	3	7	TSeries-01302020-1021-073	electrical + opto	1	500	20	0
Scn1a-SST	71	3220	3	7	TSeries-01302020-1021-073	electrical + opto	1	500	21	0
Scn1a-SST	71	3220	3	7	TSeries-01302020-1021-073	electrical + opto	1	500	22	0
Scn1a-SST	71	3220	3	7	TSeries-01302020-1021-073	electrical + opto	1	500	23	0
Scn1a-SST	71	3220	3	7	TSeries-01302020-1021-073	electrical + opto	1	500	24	0
Scn1a-SST	71	3220	3	7	TSeries-01302020-1021-073	electrical + opto	1	500	25	0
Scn1a-SST	71	3220	3	7	TSeries-01302020-1021-073	electrical + opto	1	500	26	0
Scn1a-SST	71	3220	3	7	TSeries-01302020-1021-073	electrical + opto	1	500	27	0
Scn1a-SST	71	3220	3	7	TSeries-01302020-1021-073	electrical + opto	1	500	28	1	0.362343
Scn1a-SST	71	3220	3	7	TSeries-01302020-1021-073	electrical + opto	1	500	29	0
Scn1a-SST	71	3220	3	7	TSeries-01302020-1021-073	electrical + opto	1	500	30	0
Scn1a-SST	71	3220	3	7	TSeries-01302020-1021-073	electrical + opto	1	500	31	0
Scn1a-SST	71	3220	3	7	TSeries-01302020-1021-073	electrical + opto	1	500	32	0
Scn1a-SST	71	3220	3	7	TSeries-01302020-1021-073	electrical + opto	1	500	33	0
Scn1a-SST	71	3220	3	7	TSeries-01302020-1021-073	electrical + opto	1	500	34	0
Scn1a-SST	71	3220	3	7	TSeries-01302020-1021-073	electrical + opto	1	500	35	0
Scn1a-SST	71	3220	3	7	TSeries-01302020-1021-073	electrical + opto	1	500	36	0
Scn1a-SST	71	3220	3	7	TSeries-01302020-1021-073	electrical + opto	1	500	37	0
Scn1a-SST	71	3220	3	7	TSeries-01302020-1021-073	electrical + opto	1	500	38	0
Scn1a-SST	71	3220	3	7	TSeries-01302020-1021-073	electrical + opto	1	500	39	0
Scn1a-SST	71	3220	3	7	TSeries-01302020-1021-073	electrical + opto	1	500	40	0
Scn1a-SST	71	3220	3	8	TSeries-01302020-1021-079	electrical	1	500	0	1	0.303217
Scn1a-SST	71	3220	3	8	TSeries-01302020-1021-079	electrical	1	500	1	1	0.636263
Scn1a-SST	71	3220	3	8	TSeries-01302020-1021-079	electrical	1	500	2	1	0.482739
Scn1a-SST	71	3220	3	8	TSeries-01302020-1021-079	electrical	1	500	3	1	0.824493
Scn1a-SST	71	3220	3	8	TSeries-01302020-1021-079	electrical	1	500	4	1	0.653285
Scn1a-SST	71	3220	3	8	TSeries-01302020-1021-079	electrical	1	500	5	1	0.319025
Scn1a-SST	71	3220	3	8	TSeries-01302020-1021-079	electrical	1	500	6	1	0.402206
Scn1a-SST	71	3220	3	8	TSeries-01302020-1021-079	electrical	1	500	7	1	1.43063
Scn1a-SST	71	3220	3	8	TSeries-01302020-1021-079	electrical	1	500	8	1	1.12485
Scn1a-SST	71	3220	3	8	TSeries-01302020-1021-079	electrical	1	500	9	1	0.659464
Scn1a-SST	71	3220	3	8	TSeries-01302020-1021-079	electrical	1	500	10	1	1.43781
Scn1a-SST	71	3220	3	8	TSeries-01302020-1021-079	electrical	1	500	11	1	1.83017
Scn1a-SST	71	3220	3	8	TSeries-01302020-1021-079	electrical	1	500	12	1	1.20395
Scn1a-SST	71	3220	3	8	TSeries-01302020-1021-079	electrical	1	500	13	1	0.945241
Scn1a-SST	71	3220	3	8	TSeries-01302020-1021-079	electrical	1	500	14	1	0.851179
Scn1a-SST	71	3220	3	8	TSeries-01302020-1021-079	electrical	1	500	15	1	1.28425
Scn1a-SST	71	3220	3	8	TSeries-01302020-1021-079	electrical	1	500	16	1	0.34503
Scn1a-SST	71	3220	3	8	TSeries-01302020-1021-079	electrical	1	500	17	1	0.67996
Scn1a-SST	71	3220	3	8	TSeries-01302020-1021-079	electrical	1	500	18	1	1.2125
Scn1a-SST	71	3220	3	8	TSeries-01302020-1021-079	electrical	1	500	19	1	1.145
Scn1a-SST	71	3220	3	8	TSeries-01302020-1021-079	electrical	1	500	20	1	1.05946
Scn1a-SST	71	3220	3	8	TSeries-01302020-1021-079	electrical	1	500	21	1	1.47692
Scn1a-SST	71	3220	3	8	TSeries-01302020-1021-079	electrical	1	500	22	1	0.657664
Scn1a-SST	71	3220	3	8	TSeries-01302020-1021-079	electrical	1	500	23	1	1.16351
Scn1a-SST	71	3220	3	8	TSeries-01302020-1021-079	electrical	1	500	24	1	1.52462
Scn1a-SST	71	3220	3	8	TSeries-01302020-1021-079	electrical	1	500	25	1	0.886999
Scn1a-SST	71	3220	3	8	TSeries-01302020-1021-080	opto alone control	1	500	0	0
Scn1a-SST	71	3220	3	8	TSeries-01302020-1021-080	opto alone control	1	500	1	0
Scn1a-SST	71	3220	3	8	TSeries-01302020-1021-080	opto alone control	1	500	2	0
Scn1a-SST	71	3220	3	8	TSeries-01302020-1021-080	opto alone control	1	500	3	0
Scn1a-SST	71	3220	3	8	TSeries-01302020-1021-080	opto alone control	1	500	4	0
Scn1a-SST	71	3220	3	8	TSeries-01302020-1021-080	opto alone control	1	500	5	0
Scn1a-SST	71	3220	3	8	TSeries-01302020-1021-080	opto alone control	1	500	6	0
Scn1a-SST	71	3220	3	8	TSeries-01302020-1021-080	opto alone control	1	500	7	0
Scn1a-SST	71	3220	3	8	TSeries-01302020-1021-080	opto alone control	1	500	8	0
Scn1a-SST	71	3220	3	8	TSeries-01302020-1021-080	opto alone control	1	500	9	0
Scn1a-SST	71	3220	3	8	TSeries-01302020-1021-080	opto alone control	1	500	10	0
Scn1a-SST	71	3220	3	8	TSeries-01302020-1021-080	opto alone control	1	500	11	0
Scn1a-SST	71	3220	3	8	TSeries-01302020-1021-080	opto alone control	1	500	12	0
Scn1a-SST	71	3220	3	8	TSeries-01302020-1021-080	opto alone control	1	500	13	0
Scn1a-SST	71	3220	3	8	TSeries-01302020-1021-080	opto alone control	1	500	14	0
Scn1a-SST	71	3220	3	8	TSeries-01302020-1021-080	opto alone control	1	500	15	0
Scn1a-SST	71	3220	3	8	TSeries-01302020-1021-080	opto alone control	1	500	16	0
Scn1a-SST	71	3220	3	8	TSeries-01302020-1021-080	opto alone control	1	500	17	0
Scn1a-SST	71	3220	3	8	TSeries-01302020-1021-080	opto alone control	1	500	18	0
Scn1a-SST	71	3220	3	8	TSeries-01302020-1021-080	opto alone control	1	500	19	0
Scn1a-SST	71	3220	3	8	TSeries-01302020-1021-080	opto alone control	1	500	20	0
Scn1a-SST	71	3220	3	8	TSeries-01302020-1021-080	opto alone control	1	500	21	0
Scn1a-SST	71	3220	3	8	TSeries-01302020-1021-080	opto alone control	1	500	22	0
Scn1a-SST	71	3220	3	8	TSeries-01302020-1021-080	opto alone control	1	500	23	0
Scn1a-SST	71	3220	3	8	TSeries-01302020-1021-080	opto alone control	1	500	24	0
Scn1a-SST	71	3220	3	8	TSeries-01302020-1021-080	opto alone control	1	500	25	0
Scn1a-SST	71	3220	3	8	TSeries-01302020-1021-084	electrical + opto	1	500	0	1	0.289689
Scn1a-SST	71	3220	3	8	TSeries-01302020-1021-084	electrical + opto	1	500	1	1	0.457629
Scn1a-SST	71	3220	3	8	TSeries-01302020-1021-084	electrical + opto	1	500	2	1	0.447753
Scn1a-SST	71	3220	3	8	TSeries-01302020-1021-084	electrical + opto	1	500	3	1	0.157287
Scn1a-SST	71	3220	3	8	TSeries-01302020-1021-084	electrical + opto	1	500	4	1	0.299859
Scn1a-SST	71	3220	3	8	TSeries-01302020-1021-084	electrical + opto	1	500	5	0
Scn1a-SST	71	3220	3	8	TSeries-01302020-1021-084	electrical + opto	1	500	6	1	0.334146
Scn1a-SST	71	3220	3	8	TSeries-01302020-1021-084	electrical + opto	1	500	7	0
Scn1a-SST	71	3220	3	8	TSeries-01302020-1021-084	electrical + opto	1	500	8	1	0.639475
Scn1a-SST	71	3220	3	8	TSeries-01302020-1021-084	electrical + opto	1	500	9	1	0.374778
Scn1a-SST	71	3220	3	8	TSeries-01302020-1021-084	electrical + opto	1	500	10	1	0.343204
Scn1a-SST	71	3220	3	8	TSeries-01302020-1021-084	electrical + opto	1	500	11	0
Scn1a-SST	71	3220	3	8	TSeries-01302020-1021-084	electrical + opto	1	500	12	0
Scn1a-SST	71	3220	3	8	TSeries-01302020-1021-084	electrical + opto	1	500	13	0
Scn1a-SST	71	3220	3	8	TSeries-01302020-1021-084	electrical + opto	1	500	14	0
Scn1a-SST	71	3220	3	8	TSeries-01302020-1021-084	electrical + opto	1	500	15	0
Scn1a-SST	71	3220	3	8	TSeries-01302020-1021-084	electrical + opto	1	500	16	0
Scn1a-SST	71	3220	3	8	TSeries-01302020-1021-084	electrical + opto	1	500	17	0
Scn1a-SST	71	3220	3	8	TSeries-01302020-1021-084	electrical + opto	1	500	18	0
Scn1a-SST	71	3220	3	8	TSeries-01302020-1021-084	electrical + opto	1	500	19	0
Scn1a-SST	71	3220	3	8	TSeries-01302020-1021-084	electrical + opto	1	500	20	0
Scn1a-SST	71	3220	3	8	TSeries-01302020-1021-084	electrical + opto	1	500	21	1	0.23094
Scn1a-SST	71	3220	3	8	TSeries-01302020-1021-084	electrical + opto	1	500	22	0
Scn1a-SST	71	3220	3	8	TSeries-01302020-1021-084	electrical + opto	1	500	23	0
Scn1a-SST	71	3220	3	8	TSeries-01302020-1021-084	electrical + opto	1	500	24	0
Scn1a-SST	71	3220	3	8	TSeries-01302020-1021-084	electrical + opto	1	500	25	0
Scn1a-SST	71	3220	4	9	TSeries-01302020-1021-102	electrical	1	500	0	1	0.415433
Scn1a-SST	71	3220	4	9	TSeries-01302020-1021-102	electrical	1	500	1	1	1.4252
Scn1a-SST	71	3220	4	9	TSeries-01302020-1021-102	electrical	1	500	2	0
Scn1a-SST	71	3220	4	9	TSeries-01302020-1021-102	electrical	1	500	3	0
Scn1a-SST	71	3220	4	9	TSeries-01302020-1021-102	electrical	1	500	4	1	0.250921
Scn1a-SST	71	3220	4	9	TSeries-01302020-1021-102	electrical	1	500	5	0
Scn1a-SST	71	3220	4	9	TSeries-01302020-1021-102	electrical	1	500	6	0
Scn1a-SST	71	3220	4	9	TSeries-01302020-1021-102	electrical	1	500	7	1	1.49503
Scn1a-SST	71	3220	4	9	TSeries-01302020-1021-102	electrical	1	500	8	1	1.54404
Scn1a-SST	71	3220	4	9	TSeries-01302020-1021-102	electrical	1	500	9	1	0.583289
Scn1a-SST	71	3220	4	9	TSeries-01302020-1021-102	electrical	1	500	10	1	0.642986
Scn1a-SST	71	3220	4	9	TSeries-01302020-1021-102	electrical	1	500	11	0
Scn1a-SST	71	3220	4	9	TSeries-01302020-1021-102	electrical	1	500	12	1	0.300607
Scn1a-SST	71	3220	4	9	TSeries-01302020-1021-102	electrical	1	500	13	0
Scn1a-SST	71	3220	4	9	TSeries-01302020-1021-102	electrical	1	500	14	0
Scn1a-SST	71	3220	4	9	TSeries-01302020-1021-102	electrical	1	500	15	1	0.67656
Scn1a-SST	71	3220	4	9	TSeries-01302020-1021-102	electrical	1	500	16	0
Scn1a-SST	71	3220	4	9	TSeries-01302020-1021-102	electrical	1	500	17	0
Scn1a-SST	71	3220	4	9	TSeries-01302020-1021-102	electrical	1	500	18	0
Scn1a-SST	71	3220	4	9	TSeries-01302020-1021-102	electrical	1	500	19	0
Scn1a-SST	71	3220	4	9	TSeries-01302020-1021-102	electrical	1	500	20	0
Scn1a-SST	71	3220	4	9	TSeries-01302020-1021-102	electrical	1	500	21	0
Scn1a-SST	71	3220	4	9	TSeries-01302020-1021-102	electrical	1	500	22	1	0.901985
Scn1a-SST	71	3220	4	9	TSeries-01302020-1021-102	electrical	1	500	23	0
Scn1a-SST	71	3220	4	9	TSeries-01302020-1021-102	electrical	1	500	24	0
Scn1a-SST	71	3220	4	9	TSeries-01302020-1021-102	electrical	1	500	25	0
Scn1a-SST	71	3220	4	9	TSeries-01302020-1021-102	electrical	1	500	26	0
Scn1a-SST	71	3220	4	9	TSeries-01302020-1021-103	opto alone control	1	500	0	0
Scn1a-SST	71	3220	4	9	TSeries-01302020-1021-103	opto alone control	1	500	1	0
Scn1a-SST	71	3220	4	9	TSeries-01302020-1021-103	opto alone control	1	500	2	0
Scn1a-SST	71	3220	4	9	TSeries-01302020-1021-103	opto alone control	1	500	3	0
Scn1a-SST	71	3220	4	9	TSeries-01302020-1021-103	opto alone control	1	500	4	0
Scn1a-SST	71	3220	4	9	TSeries-01302020-1021-103	opto alone control	1	500	5	0
Scn1a-SST	71	3220	4	9	TSeries-01302020-1021-103	opto alone control	1	500	6	0
Scn1a-SST	71	3220	4	9	TSeries-01302020-1021-103	opto alone control	1	500	7	0
Scn1a-SST	71	3220	4	9	TSeries-01302020-1021-103	opto alone control	1	500	8	0
Scn1a-SST	71	3220	4	9	TSeries-01302020-1021-103	opto alone control	1	500	9	0
Scn1a-SST	71	3220	4	9	TSeries-01302020-1021-103	opto alone control	1	500	10	0
Scn1a-SST	71	3220	4	9	TSeries-01302020-1021-103	opto alone control	1	500	11	0
Scn1a-SST	71	3220	4	9	TSeries-01302020-1021-103	opto alone control	1	500	12	0
Scn1a-SST	71	3220	4	9	TSeries-01302020-1021-103	opto alone control	1	500	13	0
Scn1a-SST	71	3220	4	9	TSeries-01302020-1021-103	opto alone control	1	500	14	0
Scn1a-SST	71	3220	4	9	TSeries-01302020-1021-103	opto alone control	1	500	15	0
Scn1a-SST	71	3220	4	9	TSeries-01302020-1021-103	opto alone control	1	500	16	0
Scn1a-SST	71	3220	4	9	TSeries-01302020-1021-103	opto alone control	1	500	17	0
Scn1a-SST	71	3220	4	9	TSeries-01302020-1021-103	opto alone control	1	500	18	0
Scn1a-SST	71	3220	4	9	TSeries-01302020-1021-103	opto alone control	1	500	19	0
Scn1a-SST	71	3220	4	9	TSeries-01302020-1021-103	opto alone control	1	500	20	0
Scn1a-SST	71	3220	4	9	TSeries-01302020-1021-103	opto alone control	1	500	21	0
Scn1a-SST	71	3220	4	9	TSeries-01302020-1021-103	opto alone control	1	500	22	0
Scn1a-SST	71	3220	4	9	TSeries-01302020-1021-103	opto alone control	1	500	23	0
Scn1a-SST	71	3220	4	9	TSeries-01302020-1021-103	opto alone control	1	500	24	0
Scn1a-SST	71	3220	4	9	TSeries-01302020-1021-103	opto alone control	1	500	25	0
Scn1a-SST	71	3220	4	9	TSeries-01302020-1021-103	opto alone control	1	500	26	0
Scn1a-SST	71	3220	4	9	TSeries-01302020-1021-107	electrical + opto	1	500	0	1	0.381389
Scn1a-SST	71	3220	4	9	TSeries-01302020-1021-107	electrical + opto	1	500	1	1	0.444939
Scn1a-SST	71	3220	4	9	TSeries-01302020-1021-107	electrical + opto	1	500	2	0
Scn1a-SST	71	3220	4	9	TSeries-01302020-1021-107	electrical + opto	1	500	3	0
Scn1a-SST	71	3220	4	9	TSeries-01302020-1021-107	electrical + opto	1	500	4	0
Scn1a-SST	71	3220	4	9	TSeries-01302020-1021-107	electrical + opto	1	500	5	0
Scn1a-SST	71	3220	4	9	TSeries-01302020-1021-107	electrical + opto	1	500	6	0
Scn1a-SST	71	3220	4	9	TSeries-01302020-1021-107	electrical + opto	1	500	7	1	1.27085
Scn1a-SST	71	3220	4	9	TSeries-01302020-1021-107	electrical + opto	1	500	8	0
Scn1a-SST	71	3220	4	9	TSeries-01302020-1021-107	electrical + opto	1	500	9	0
Scn1a-SST	71	3220	4	9	TSeries-01302020-1021-107	electrical + opto	1	500	10	1	0.702881
Scn1a-SST	71	3220	4	9	TSeries-01302020-1021-107	electrical + opto	1	500	11	0
Scn1a-SST	71	3220	4	9	TSeries-01302020-1021-107	electrical + opto	1	500	12	1	0.286654
Scn1a-SST	71	3220	4	9	TSeries-01302020-1021-107	electrical + opto	1	500	13	0
Scn1a-SST	71	3220	4	9	TSeries-01302020-1021-107	electrical + opto	1	500	14	0
Scn1a-SST	71	3220	4	9	TSeries-01302020-1021-107	electrical + opto	1	500	15	0
Scn1a-SST	71	3220	4	9	TSeries-01302020-1021-107	electrical + opto	1	500	16	0
Scn1a-SST	71	3220	4	9	TSeries-01302020-1021-107	electrical + opto	1	500	17	0
Scn1a-SST	71	3220	4	9	TSeries-01302020-1021-107	electrical + opto	1	500	18	0
Scn1a-SST	71	3220	4	9	TSeries-01302020-1021-107	electrical + opto	1	500	19	0
Scn1a-SST	71	3220	4	9	TSeries-01302020-1021-107	electrical + opto	1	500	20	1	0.346731
Scn1a-SST	71	3220	4	9	TSeries-01302020-1021-107	electrical + opto	1	500	21	0
Scn1a-SST	71	3220	4	9	TSeries-01302020-1021-107	electrical + opto	1	500	22	1	0.349387
Scn1a-SST	71	3220	4	9	TSeries-01302020-1021-107	electrical + opto	1	500	23	0
Scn1a-SST	71	3220	4	9	TSeries-01302020-1021-107	electrical + opto	1	500	24	0
Scn1a-SST	71	3220	4	9	TSeries-01302020-1021-107	electrical + opto	1	500	25	0
Scn1a-SST	71	3220	4	9	TSeries-01302020-1021-107	electrical + opto	1	500	26	0
Scn1a-SST	71	3220	4	10	TSeries-01302020-1021-113	electrical	1	500	0	1	0.609433
Scn1a-SST	71	3220	4	10	TSeries-01302020-1021-113	electrical	1	500	1	1	0.571255
Scn1a-SST	71	3220	4	10	TSeries-01302020-1021-113	electrical	1	500	2	1	1.08131
Scn1a-SST	71	3220	4	10	TSeries-01302020-1021-113	electrical	1	500	3	0
Scn1a-SST	71	3220	4	10	TSeries-01302020-1021-113	electrical	1	500	4	1	0.208646
Scn1a-SST	71	3220	4	10	TSeries-01302020-1021-113	electrical	1	500	5	1	0.356586
Scn1a-SST	71	3220	4	10	TSeries-01302020-1021-113	electrical	1	500	6	1	0.569399
Scn1a-SST	71	3220	4	10	TSeries-01302020-1021-113	electrical	1	500	7	0
Scn1a-SST	71	3220	4	10	TSeries-01302020-1021-113	electrical	1	500	8	1	1.84723
Scn1a-SST	71	3220	4	10	TSeries-01302020-1021-113	electrical	1	500	9	1	0.254259
Scn1a-SST	71	3220	4	10	TSeries-01302020-1021-113	electrical	1	500	10	1	0.673317
Scn1a-SST	71	3220	4	10	TSeries-01302020-1021-113	electrical	1	500	11	1	1.15582
Scn1a-SST	71	3220	4	10	TSeries-01302020-1021-113	electrical	1	500	12	1	1.07582
Scn1a-SST	71	3220	4	10	TSeries-01302020-1021-113	electrical	1	500	13	1	0.250611
Scn1a-SST	71	3220	4	10	TSeries-01302020-1021-113	electrical	1	500	14	1	0.457967
Scn1a-SST	71	3220	4	10	TSeries-01302020-1021-113	electrical	1	500	15	1	0.825683
Scn1a-SST	71	3220	4	10	TSeries-01302020-1021-113	electrical	1	500	16	1	0.439918
Scn1a-SST	71	3220	4	10	TSeries-01302020-1021-113	electrical	1	500	17	1	0.471556
Scn1a-SST	71	3220	4	10	TSeries-01302020-1021-113	electrical	1	500	18	1	0.533829
Scn1a-SST	71	3220	4	10	TSeries-01302020-1021-113	electrical	1	500	19	1	0.406872
Scn1a-SST	71	3220	4	10	TSeries-01302020-1021-113	electrical	1	500	20	1	0.479661
Scn1a-SST	71	3220	4	10	TSeries-01302020-1021-113	electrical	1	500	21	1	1.02998
Scn1a-SST	71	3220	4	10	TSeries-01302020-1021-113	electrical	1	500	22	1	0.679965
Scn1a-SST	71	3220	4	10	TSeries-01302020-1021-113	electrical	1	500	23	1	0.962302
Scn1a-SST	71	3220	4	10	TSeries-01302020-1021-113	electrical	1	500	24	1	1.95251
Scn1a-SST	71	3220	4	10	TSeries-01302020-1021-113	electrical	1	500	25	1	0.234365
Scn1a-SST	71	3220	4	10	TSeries-01302020-1021-113	electrical	1	500	26	1	0.87152
Scn1a-SST	71	3220	4	10	TSeries-01302020-1021-113	electrical	1	500	27	1	1.40376
Scn1a-SST	71	3220	4	10	TSeries-01302020-1021-113	electrical	1	500	28	1	0.90031
Scn1a-SST	71	3220	4	10	TSeries-01302020-1021-113	electrical	1	500	29	1	1.36821
Scn1a-SST	71	3220	4	10	TSeries-01302020-1021-113	electrical	1	500	30	1	1.45252
Scn1a-SST	71	3220	4	10	TSeries-01302020-1021-113	electrical	1	500	31	1	0.333283
Scn1a-SST	71	3220	4	10	TSeries-01302020-1021-113	electrical	1	500	32	1	0.954382
Scn1a-SST	71	3220	4	10	TSeries-01302020-1021-113	electrical	1	500	33	1	0.240472
Scn1a-SST	71	3220	4	10	TSeries-01302020-1021-113	electrical	1	500	34	1	0.786397
Scn1a-SST	71	3220	4	10	TSeries-01302020-1021-113	electrical	1	500	35	1	0.446582
Scn1a-SST	71	3220	4	10	TSeries-01302020-1021-113	electrical	1	500	36	1	0.307488
Scn1a-SST	71	3220	4	10	TSeries-01302020-1021-114	opto alone control	1	500	0	0
Scn1a-SST	71	3220	4	10	TSeries-01302020-1021-114	opto alone control	1	500	1	0
Scn1a-SST	71	3220	4	10	TSeries-01302020-1021-114	opto alone control	1	500	2	0
Scn1a-SST	71	3220	4	10	TSeries-01302020-1021-114	opto alone control	1	500	3	0
Scn1a-SST	71	3220	4	10	TSeries-01302020-1021-114	opto alone control	1	500	4	0
Scn1a-SST	71	3220	4	10	TSeries-01302020-1021-114	opto alone control	1	500	5	0
Scn1a-SST	71	3220	4	10	TSeries-01302020-1021-114	opto alone control	1	500	6	0
Scn1a-SST	71	3220	4	10	TSeries-01302020-1021-114	opto alone control	1	500	7	0
Scn1a-SST	71	3220	4	10	TSeries-01302020-1021-114	opto alone control	1	500	8	0
Scn1a-SST	71	3220	4	10	TSeries-01302020-1021-114	opto alone control	1	500	9	0
Scn1a-SST	71	3220	4	10	TSeries-01302020-1021-114	opto alone control	1	500	10	0
Scn1a-SST	71	3220	4	10	TSeries-01302020-1021-114	opto alone control	1	500	11	0
Scn1a-SST	71	3220	4	10	TSeries-01302020-1021-114	opto alone control	1	500	12	0
Scn1a-SST	71	3220	4	10	TSeries-01302020-1021-114	opto alone control	1	500	13	0
Scn1a-SST	71	3220	4	10	TSeries-01302020-1021-114	opto alone control	1	500	14	0
Scn1a-SST	71	3220	4	10	TSeries-01302020-1021-114	opto alone control	1	500	15	0
Scn1a-SST	71	3220	4	10	TSeries-01302020-1021-114	opto alone control	1	500	16	0
Scn1a-SST	71	3220	4	10	TSeries-01302020-1021-114	opto alone control	1	500	17	0
Scn1a-SST	71	3220	4	10	TSeries-01302020-1021-114	opto alone control	1	500	18	0
Scn1a-SST	71	3220	4	10	TSeries-01302020-1021-114	opto alone control	1	500	19	0
Scn1a-SST	71	3220	4	10	TSeries-01302020-1021-114	opto alone control	1	500	20	0
Scn1a-SST	71	3220	4	10	TSeries-01302020-1021-114	opto alone control	1	500	21	0
Scn1a-SST	71	3220	4	10	TSeries-01302020-1021-114	opto alone control	1	500	22	0
Scn1a-SST	71	3220	4	10	TSeries-01302020-1021-114	opto alone control	1	500	23	0
Scn1a-SST	71	3220	4	10	TSeries-01302020-1021-114	opto alone control	1	500	24	0
Scn1a-SST	71	3220	4	10	TSeries-01302020-1021-114	opto alone control	1	500	25	0
Scn1a-SST	71	3220	4	10	TSeries-01302020-1021-114	opto alone control	1	500	26	0
Scn1a-SST	71	3220	4	10	TSeries-01302020-1021-114	opto alone control	1	500	27	0
Scn1a-SST	71	3220	4	10	TSeries-01302020-1021-114	opto alone control	1	500	28	0
Scn1a-SST	71	3220	4	10	TSeries-01302020-1021-114	opto alone control	1	500	29	0
Scn1a-SST	71	3220	4	10	TSeries-01302020-1021-114	opto alone control	1	500	30	0
Scn1a-SST	71	3220	4	10	TSeries-01302020-1021-114	opto alone control	1	500	31	0
Scn1a-SST	71	3220	4	10	TSeries-01302020-1021-114	opto alone control	1	500	32	0
Scn1a-SST	71	3220	4	10	TSeries-01302020-1021-114	opto alone control	1	500	33	0
Scn1a-SST	71	3220	4	10	TSeries-01302020-1021-114	opto alone control	1	500	34	0
Scn1a-SST	71	3220	4	10	TSeries-01302020-1021-114	opto alone control	1	500	35	0
Scn1a-SST	71	3220	4	10	TSeries-01302020-1021-114	opto alone control	1	500	36	0
Scn1a-SST	71	3220	4	10	TSeries-01302020-1021-118	electrical + opto	1	500	0	0
Scn1a-SST	71	3220	4	10	TSeries-01302020-1021-118	electrical + opto	1	500	1	1	0.585166
Scn1a-SST	71	3220	4	10	TSeries-01302020-1021-118	electrical + opto	1	500	2	0
Scn1a-SST	71	3220	4	10	TSeries-01302020-1021-118	electrical + opto	1	500	3	0
Scn1a-SST	71	3220	4	10	TSeries-01302020-1021-118	electrical + opto	1	500	4	0
Scn1a-SST	71	3220	4	10	TSeries-01302020-1021-118	electrical + opto	1	500	5	0
Scn1a-SST	71	3220	4	10	TSeries-01302020-1021-118	electrical + opto	1	500	6	0
Scn1a-SST	71	3220	4	10	TSeries-01302020-1021-118	electrical + opto	1	500	7	1	0.217104
Scn1a-SST	71	3220	4	10	TSeries-01302020-1021-118	electrical + opto	1	500	8	1	1.40529
Scn1a-SST	71	3220	4	10	TSeries-01302020-1021-118	electrical + opto	1	500	9	1	0.268524
Scn1a-SST	71	3220	4	10	TSeries-01302020-1021-118	electrical + opto	1	500	10	1	0.816126
Scn1a-SST	71	3220	4	10	TSeries-01302020-1021-118	electrical + opto	1	500	11	0
Scn1a-SST	71	3220	4	10	TSeries-01302020-1021-118	electrical + opto	1	500	12	1	0.227773
Scn1a-SST	71	3220	4	10	TSeries-01302020-1021-118	electrical + opto	1	500	13	0
Scn1a-SST	71	3220	4	10	TSeries-01302020-1021-118	electrical + opto	1	500	14	1	0.628695
Scn1a-SST	71	3220	4	10	TSeries-01302020-1021-118	electrical + opto	1	500	15	1	0.302618
Scn1a-SST	71	3220	4	10	TSeries-01302020-1021-118	electrical + opto	1	500	16	0
Scn1a-SST	71	3220	4	10	TSeries-01302020-1021-118	electrical + opto	1	500	17	1	0.461667
Scn1a-SST	71	3220	4	10	TSeries-01302020-1021-118	electrical + opto	1	500	18	0
Scn1a-SST	71	3220	4	10	TSeries-01302020-1021-118	electrical + opto	1	500	19	1	0.427422
Scn1a-SST	71	3220	4	10	TSeries-01302020-1021-118	electrical + opto	1	500	20	1	0.523084
Scn1a-SST	71	3220	4	10	TSeries-01302020-1021-118	electrical + opto	1	500	21	1	0.64335
Scn1a-SST	71	3220	4	10	TSeries-01302020-1021-118	electrical + opto	1	500	22	1	0.415594
Scn1a-SST	71	3220	4	10	TSeries-01302020-1021-118	electrical + opto	1	500	23	1	0.252657
Scn1a-SST	71	3220	4	10	TSeries-01302020-1021-118	electrical + opto	1	500	24	1	0.48989
Scn1a-SST	71	3220	4	10	TSeries-01302020-1021-118	electrical + opto	1	500	25	1	0.424877
Scn1a-SST	71	3220	4	10	TSeries-01302020-1021-118	electrical + opto	1	500	26	1	0.514137
Scn1a-SST	71	3220	4	10	TSeries-01302020-1021-118	electrical + opto	1	500	27	1	0.42922
Scn1a-SST	71	3220	4	10	TSeries-01302020-1021-118	electrical + opto	1	500	28	1	0.341566
Scn1a-SST	71	3220	4	10	TSeries-01302020-1021-118	electrical + opto	1	500	29	1	0.673883
Scn1a-SST	71	3220	4	10	TSeries-01302020-1021-118	electrical + opto	1	500	30	1	0.310836
Scn1a-SST	71	3220	4	10	TSeries-01302020-1021-118	electrical + opto	1	500	31	1	0.501336
Scn1a-SST	71	3220	4	10	TSeries-01302020-1021-118	electrical + opto	1	500	32	0
Scn1a-SST	71	3220	4	10	TSeries-01302020-1021-118	electrical + opto	1	500	33	0
Scn1a-SST	71	3220	4	10	TSeries-01302020-1021-118	electrical + opto	1	500	34	1	0.493505
Scn1a-SST	71	3220	4	10	TSeries-01302020-1021-118	electrical + opto	1	500	35	1	0.235045
Scn1a-SST	71	3220	4	10	TSeries-01302020-1021-118	electrical + opto	1	500	36	1	0.220322
