# Supplementary material for: Corticohippocampal circuit dysfunction in a mouse model of Dravet syndrome
Source: eLife. 2022 Feb 25;11:e69293. doi: 10.7554/eLife.69293 (PMC8920506; doi:10.7554/eLife.69293)
Supplement: Figure 8—source data 2. [file elife-69293-fig8-data2.xlsx]

## Sheet: PV
Genotype	age	mouse	slice	field	File name	stim type	pulses	power	Total Cells	Activated Cells	Percentage Activated	Total Cells Mod	Activated Cells Mod	Normalized Activated	Activated Amplitude nsame
Scn1a-PV	69	2871	1	1	TSeries-10292019-1106-017	electrical	1	500	61	59	96.7213	59	59	100	0.485525
Scn1a-PV	69	2871	1	1	TSeries-10292019-1106-018	electrical + opto	1	500	61	13	21.3115	59	13	22.0339	0.0316563
Scn1a-PV	61	2910	1	1	TSeries-10292019-1106-007	electrical	1	500	83	50	60.241	50	50	100	0.55996
Scn1a-PV	61	2910	1	1	TSeries-10292019-1106-008	electrical + opto	1	500	83	26	31.3253	50	26	52	0.188416
Scn1a-PV	61	2910	1	2	TSeries-10292019-1106-012	electrical	1	500	109	64	58.7156	64	64	100	0.459421
Scn1a-PV	61	2910	1	2	TSeries-10292019-1106-013	electrical + opto	1	500	109	17	15.5963	64	16	25	0.0599537
Scn1a-PV	62	2909	1	1	TSeries-10312019-1006-007	electrical	1	500	94	16	17.0213	16	16	100	0.234113
Scn1a-PV	62	2909	1	1	TSeries-10312019-1006-008	electrical + opto	1	500	94	10	10.6383	16	3	18.75	0.0540781
Scn1a-PV	62	2909	1	2	TSeries-10312019-1006-020	electrical	1	500	107	19	17.757	19	19	100	0.260356
Scn1a-PV	62	2909	1	2	TSeries-10312019-1006-021	electrical + opto	1	500	107	11	10.2804	19	4	21.0526	0.0299137
Scn1a-PV	62	2909	1	3	TSeries-10312019-1006-043	electrical	1	500	117	18	15.3846	18	18	100	0.19466
Scn1a-PV	62	2909	1	3	TSeries-10312019-1006-044	electrical + opto	1	500	117	10	8.54701	18	1	5.55556	0.00484581
Scn1a-PV	68	3357	1	1	TSeries-03092020-0954-001	electrical	1	500	43	39	90.6977	39	39	100	0.507947
Scn1a-PV	68	3357	1	1	TSeries-03092020-0954-002	opto alone control	1	500	43	0	0	39	0	0	0
Scn1a-PV	68	3357	1	1	TSeries-03092020-0954-006	electrical + opto	1	500	43	11	25.5814	39	11	28.2051	0.132388
Scn1a-PV	68	3357	1	2	TSeries-03092020-0954-012	electrical	1	500	71	52	73.2394	52	52	100	0.452955
Scn1a-PV	68	3357	1	2	TSeries-03092020-0954-013	opto alone control	1	500	71	0	0	52	0	0	0
Scn1a-PV	68	3357	1	2	TSeries-03092020-0954-017	electrical + opto	1	500	71	37	52.1127	52	31	59.6154	0.217563
Scn1a-PV	68	3357	1	3	TSeries-03092020-0954-023	electrical	1	500	72	52	72.2222	52	52	100	0.439906
Scn1a-PV	68	3357	1	3	TSeries-03092020-0954-024	opto alone control	1	500	72	0	0	52	0	0	0
Scn1a-PV	68	3357	1	3	TSeries-03092020-0954-028	electrical + opto	1	500	72	31	43.0556	52	31	59.6154	0.214832
Scn1a-PV	68	3378	1	1	TSeries-03102020-1005-001	electrical	1	500	43	5	11.6279	5	5	100	0.391409
Scn1a-PV	68	3378	1	1	TSeries-03102020-1005-002	opto alone control	1	500	43	0	0	5	0	0	0
Scn1a-PV	68	3378	1	1	TSeries-03102020-1005-006	electrical + opto	1	500	43	10	23.2558	5	3	60	0.384654
Scn1a-PV	71	3355	1	1	TSeries-03122020-1111-001	electrical	1	500	71	27	38.0282	27	27	100	0.290074
Scn1a-PV	71	3355	1	1	TSeries-03122020-1111-002	opto alone control	1	500	71	0	0	27	0	0	0
Scn1a-PV	71	3355	1	1	TSeries-03122020-1111-006	electrical + opto	1	500	71	2	2.8169	27	2	7.40741	0.0111737
Scn1a-PV	71	3355	1	2	TSeries-03122020-1111-012	electrical	1	500	79	36	45.5696	36	36	100	0.380969
Scn1a-PV	71	3355	1	2	TSeries-03122020-1111-013	opto alone control	1	500	79	5	6.32911	36	3	8.33333	0.0101552
Scn1a-PV	71	3355	1	2	TSeries-03122020-1111-017	electrical + opto	1	500	79	1	1.26582	36	1	2.77778	0.00490303
Scn1a-PV	71	3355	1	3	TSeries-03122020-1111-023	electrical	1	500	104	28	26.9231	28	28	100	0.378948
Scn1a-PV	71	3355	1	3	TSeries-03122020-1111-024	opto alone control	1	500	104	2	1.92308	28	1	3.57143	0.00609204
Scn1a-PV	71	3355	1	3	TSeries-03122020-1111-028	electrical + opto	1	500	104	4	3.84615	28	0	0	0

## Sheet: SST
Genotype	age	mouse	slice	field	File name	stim type	pulses	power	Total Cells	Activated Cells	Percentage Activated	Total Cells Mod	Activated Cells Mod	Normalized Activated	Activated Amplitude
Scn1a-SST	69	3214	1	1	TSeries-01012009-0002-009	electrical	1	500	17	11	64.7059	11	11	100	0.578505
Scn1a-SST	69	3214	1	1	TSeries-01012009-0002-011	opto alone control	1	500	17	0	0	11	0	0	0
Scn1a-SST	69	3214	1	1	TSeries-01012009-0002-013	electrical + opto	1	500	17	8	47.0588	11	7	63.6364	0.166466
Scn1a-SST	68	3252	2	2	TSeries-01292020-1041-009	electrical	1	500	73	4	5.47945	4	4	100	0.583602
Scn1a-SST	68	3252	2	2	TSeries-01292020-1041-010	opto alone control	1	500	73	0	0	4	0	0	0
Scn1a-SST	68	3252	2	2	TSeries-01292020-1041-011	electrical + opto	1	500	73	3	4.10959	4	2	50	0.403784
Scn1a-SST	68	3252	2	3	TSeries-01292020-1041-017	electrical	1	500	91	28	30.7692	28	28	100	0.402306
Scn1a-SST	68	3252	2	3	TSeries-01292020-1041-018	opto alone control	1	500	91	0	0	28	0	0	0
Scn1a-SST	68	3252	2	3	TSeries-01292020-1041-020	electrical + opto	1	500	91	7	7.69231	28	5	17.8571	0.0678777
Scn1a-SST	68	3252	2	4	TSeries-01292020-1041-025	electrical	1	500	80	37	46.25	37	37	100	0.577398
Scn1a-SST	68	3252	2	4	TSeries-01292020-1041-026	opto alone control	1	500	80	0	0	37	0	0	0
Scn1a-SST	68	3252	2	4	TSeries-01292020-1041-028	electrical + opto	1	500	80	11	13.75	37	6	16.2162	0.043454
Scn1a-SST	68	3252	3	6	TSeries-01292020-1041-034	electrical	1	500	63	19	30.1587	19	19	100	0.917254
Scn1a-SST	68	3252	3	6	TSeries-01292020-1041-035	opto alone control	1	500	63	0	0	19	0	0	0
Scn1a-SST	68	3252	3	6	TSeries-01292020-1041-039	electrical + opto	1	500	63	13	20.6349	19	12	63.1579	0.456558
Scn1a-SST	68	3252	3	7	TSeries-01292020-1041-045	electrical	1	500	41	24	58.5366	24	24	100	0.861585
Scn1a-SST	68	3252	3	7	TSeries-01292020-1041-046	opto alone control	1	500	41	19	46.3415	24	18	75	0.570366
Scn1a-SST	68	3252	3	7	TSeries-01292020-1041-050	electrical + opto	1	500	41	15	36.5854	24	15	62.5	0.326188
Scn1a-SST	71	3220	1	1	TSeries-01302020-1021-001	electrical	1	500	36	34	94.4444	34	34	100	0.485428
Scn1a-SST	71	3220	1	1	TSeries-01302020-1021-002	opto alone control	1	500	36	0	0	34	0	0	0
Scn1a-SST	71	3220	1	1	TSeries-01302020-1021-006	electrical + opto	1	500	36	18	50	34	17	50	0.186885
Scn1a-SST	71	3220	1	2	TSeries-01302020-1021-012	electrical	1	500	25	21	84	21	21	100	0.560716
Scn1a-SST	71	3220	1	2	TSeries-01302020-1021-013	opto alone control	1	500	25	0	0	21	0	0	0
Scn1a-SST	71	3220	1	2	TSeries-01302020-1021-017	electrical + opto	1	500	25	22	88	21	19	90.4762	0.418877
Scn1a-SST	71	3220	1	3	TSeries-01302020-1021-023	electrical	1	500	29	22	75.8621	22	22	100	0.608048
Scn1a-SST	71	3220	1	3	TSeries-01302020-1021-024	opto alone control	1	500	29	0	0	22	0	0	0
Scn1a-SST	71	3220	1	3	TSeries-01302020-1021-028	electrical + opto	1	500	29	17	58.6207	22	16	72.7273	0.386917
Scn1a-SST	71	3220	2	5	TSeries-01302020-1021-046	electrical	1	500	46	30	65.2174	30	30	100	0.36768
Scn1a-SST	71	3220	2	5	TSeries-01302020-1021-047	opto alone control	1	500	46	0	0	30	0	0	0
Scn1a-SST	71	3220	2	5	TSeries-01302020-1021-051	electrical + opto	1	500	46	8	17.3913	30	8	26.6667	0.105148
Scn1a-SST	71	3220	2	6	TSeries-01302020-1021-057	electrical	1	500	31	29	93.5484	29	29	100	0.504399
Scn1a-SST	71	3220	2	6	TSeries-01302020-1021-058	opto alone control	1	500	31	0	0	29	0	0	0
Scn1a-SST	71	3220	2	6	TSeries-01302020-1021-062	electrical + opto	1	500	31	30	96.7742	29	29	100	0.374118
Scn1a-SST	71	3220	3	7	TSeries-01302020-1021-068	electrical	1	500	41	39	95.122	39	39	100	0.709959
Scn1a-SST	71	3220	3	7	TSeries-01302020-1021-069	opto alone control	1	500	41	0	0	39	0	0	0
Scn1a-SST	71	3220	3	7	TSeries-01302020-1021-073	electrical + opto	1	500	41	5	12.1951	39	5	12.8205	0.0365075
Scn1a-SST	71	3220	3	8	TSeries-01302020-1021-079	electrical	1	500	26	26	100	26	26	100	0.943863
Scn1a-SST	71	3220	3	8	TSeries-01302020-1021-080	opto alone control	1	500	26	0	0	26	0	0	0
Scn1a-SST	71	3220	3	8	TSeries-01302020-1021-084	electrical + opto	1	500	26	10	38.4615	26	10	38.4615	0.137491
Scn1a-SST	71	3220	4	9	TSeries-01302020-1021-102	electrical	1	500	27	10	37.037	10	10	100	0.823606
Scn1a-SST	71	3220	4	9	TSeries-01302020-1021-103	opto alone control	1	500	27	0	0	10	0	0	0
Scn1a-SST	71	3220	4	9	TSeries-01302020-1021-107	electrical + opto	1	500	27	7	25.9259	10	6	60	0.34361
Scn1a-SST	71	3220	4	10	TSeries-01302020-1021-113	electrical	1	500	37	35	94.5946	35	35	100	0.748378
Scn1a-SST	71	3220	4	10	TSeries-01302020-1021-114	opto alone control	1	500	37	0	0	35	0	0	0
Scn1a-SST	71	3220	4	10	TSeries-01302020-1021-118	electrical + opto	1	500	37	25	67.5676	35	24	68.5714	0.331217
