# Supplementary material for: Corticohippocampal circuit dysfunction in a mouse model of Dravet syndrome
Source: eLife. 2022 Feb 25;11:e69293. doi: 10.7554/eLife.69293 (PMC8920506; doi:10.7554/eLife.69293)
Supplement: Table 1—source data 1. [file elife-69293-table1-data1.xlsx]

## Sheet: early postnatal - Scn1a
Vm	-73.6367	-86.1914	-85.2099	-78.5706	-77.0177	-83.1249	-82.6295	-80.9157	-72.9484	-83.5464	-71.6796	-82.6181	-85.8509	-85.1923	-69.4099	-70.9425	-60.318	-77.2552	-74.7514
Rm	419.246	372.979	434.252	553.358	341.092	416.007	552.916	377.38	240.167	309.882	265.666	439.635	382.504	335.971	289.697	349.043	306.755	390.877	364.637
Time Constant	6.07189	7.13748	7.00765	10	4.73701	11.8625	20.7132	25.7291	3.60174	3.288	10.9408	10	5.297	10.8349	2.85192	6.16968	4.08738	3.27463	4.70564
Rheobase	70.2987	50.7401	50.3352	19.7965	121.24	30.4315	19.7544	30.4496	60.2274	50.5333	70.489	40.4588	50.5364	50.5508	80.6228	80.4001	120.738	80.4241	161.317
AP Threshold	-32.663	-38.3911	-38.9221	-28.833	-25.0549	-28.8513	-24.5483	-32.3547	-55.4382	-42.8589	-34.5215	-30.4871	-36.6882	-41.0889	-37.8876	-39.5203	-40.3381	-41.7938	-36.908
AP Amplitude	69.6503	84.2285	84.8206	64.9658	74.2798	75.9705	61.261	77.4902	101.52	90.2222	79.0161	78.8574	86.2183	91.9312	65.7806	85.083	87.5488	90.4694	87.2925
AP Peak	36.9873	45.8374	45.8984	36.1328	49.2249	47.1191	36.7126	45.1355	46.0815	47.3633	44.4946	48.3704	49.53	50.8423	27.8931	45.5628	47.2107	48.6755	50.3845
AP Rise Time	0.642	0.512	0.478	0.596	0.664	0.608	0.768	0.494	0.528	0.478	0.534	0.584	0.494	0.478	0.55	0.452	0.476	0.47	0.468
AP Halfwidth	0.8836	0.7784	0.78	0.8514	0.671	0.7292	0.8204	0.7008	0.6784	0.6718	0.7696	0.8436	0.7466	0.7648	0.8564	0.7086	0.684	0.7122	0.7268
AHP Amplitude	-12.4817	-14.5569	-16.1438	-14.4958	-20.6604	-21.9116	-21.8201	-16.8457	-1.92261	-10.437	-16.8457	-17.6697	-16.3269	-10.8643	-10.7727	-13.4583	-16.4185	-16.6321	-17.8223
AHP time	4.98	5.02	4.98	4.74	2.26	5	5.02	4.98	1.52	1.64	2.12	2.72	2.16	2.1	2.04	1.84	1.72	1.86	1.88
Sag	2.13449	4.22245	2.87696	5.25073	2.13047	2.40303	5.45119	2.12107	1.83668	2.85217	2.93669	4.79801	2.93097	1.84587	2.90574	4.48332	1.84498	4.97907	2.91616
Max instantaneous	114.679	126.904	151.057	80.7754	129.534	100.402	52.356	105.263	238.095	131.234	137.741	122.249	179.211	182.482	109.17	123.457	196.85	190.84	179.211
Max steady-state	48.3317	58.3314	63.3312	41.6653	58.3314	49.9983	38.3321	56.6648	73.3309	59.998	56.6648	58.3314	81.6639	78.3307	41.6625	39.996	48.3285	54.9945	66.6578

## Sheet: early postnatal - WT
Vm	-75.611	-75.0747	-85.5299	-90.4407	-82.5721	-79.465	-76.8898	-69.3168	-77.6374	-80.3928	-83.5054	-81.4918	-82.0544	-76.4365	-71.7375	-79.8859	-76.4034	-71.2365	-52.0588	-82.5402	-79.0603
Rm	657.707	325.921	476.193	570.357	311.608	245.606	316.647	352.51	434.093	288.034	390.074	323.139	373.993	281.303	336.744	1128.8	539.551	337.822	252.057	283.601	278.218
Time Constant	3.95781	8.98233	9.12158	10.0555	10	10.5666	4.28822	9.47901	14.3618	6.5307	10	8.17507	25.7887	12.379	9.68176	17.984	2.88873	5.59779	4.55476	0.921628	6.10656
Rheobase	40.1857	80.4939	40.3997	40.4771	60.4481	80.3144	50.3191	80.306	50.337	60.4104	50.5632	60.5031	40.5806	60.3556	39.6411	9.66463	80.4211	80.4796	161.425	121.562	161.599
AP Threshold	-25	-38.0096	-33.9783	-35.9619	-38.8	-36.023	-37.03	-35.0586	-33.3313	-40.9698	-35.968	-34.7656	-39.856	-23.2056	-35.1257	-23.9685	-41.1987	-39.8376	-49.8718	-41.8549	-35.7544
AP Amplitude	69.8	85.3424	82.1045	84.0271	91.0767	92.7857	86.5906	89.1052	81.0913	90.683	88.3362	87.8357	92.1326	79.2969	83.6182	58.0872	79.4373	90.9851	85.8521	69.7174	85.2539
AP Peak	44.8	47.3328	48.1262	48.0652	52.2766	56.7627	49.5605	54.0466	47.76	49.7131	52.3682	53.0701	52.2766	56.0913	48.4924	34.1187	38.2385	51.1475	35.9802	27.8625	49.4995
AP Rise Time	0.076	0.55	0.518	0.528	0.508	0.478	0.548	0.576	0.534	0.53	0.528	0.554	0.484	0.628	0.544	0.788	0.504	0.482	0.468	0.554	0.696
AP Halfwidth	0.1266	0.8892	0.8356	0.86	0.82	0.8348	0.8598	0.777	0.8116	0.8492	0.8502	0.841	0.8648	0.7606	0.8774	1.1532	0.7974	0.705	0.7604	0.8732	0.6942
AHP Amplitude	-13.4	-16.9067	-15.3503	-18.158	-15.3198	-14.0381	-15.2893	-13.4583	-19.043	-14.2822	-15.0452	-18.8599	-13.5498	-20.7825	-10.8032	-17.3035	-15.9607	-14.1296	-11.4441	-11.1084	-22.644
AHP time	4.24	2.48	5	4.9	2.26	2.1	2.56	2.18	4.9	2.2	2.82	2.54	2.28	2.66	4.82	5.02	2.26	1.76	1.82	1.96	1.94
Sag	2.03322	3.02737	4.89638	4.87526	1.2831	1.8668	7.3898	7.23522	1.85736	2.86755	4.65575	3.49278	3.20871	9.1552	4.5169		4.14054	2.73636	3.40159	3.43377	2.98734
Max instantaneous	121.951	177.936	134.409	147.929	199.203	198.413	141.243	165.017	105.042	183.824	155.763	155.763	178.571	157.729	144.092	34.0368	180.505	205.761	204.918	173.611	198.413
Max steady-state	28.3324	68.3311	58.3314	66.6644	78.3307	69.9977	58.3314	54.9982	59.998	71.6643	66.6644	68.3311	68.3311	56.6648	61.6646	29.999	68.3265	76.6564	64.9913	118.322	63.3249

## Sheet: young adult - Scn1a
Vm	-86.3013	-87.8327	-77.0631	-78.6309	-78.6586	-70.3557	-80.427	-72.9802	-79.8688	-77.4724	-73.1415	-80.4132	-83.3203	-61.3332	-80.4589	-81.6853
Rm	375.786	285.423	313.17	201.271	162.243	168.23	190.511	173.649	168.016	421.331	190.441	167.17	267.976	184.161	244.007	275.533
Time Constant	4.18809	3.6417	4.72612	5.32482	7.07871	5.84825	5.07555	10.9001	6.27588	8.76544	13.6277	6.24168	6.34551	3.98509	11.0928	12.1596
Rheobase	60.6015	70.4892	60.3849	151.328	131.122	110.536	100.465	90.4383	151.303	121.345	283.043	242.559	80.8074	201.345	162.196	121.568
AP Threshold	-35.7056	-39.7186	-36.1755	-27.5391	-38.2629	-31.1829	-47.1802	-38.2843	-29.9194	-38.678	-27.6611	-34.552	-46.1243	-41.748	-41.333	-40.5029
AP Amplitude	76.9348	85.2203	79.1138	76.3367	78.2104	85.0769	95.7031	89.5844	83.8135	76.5503	71.5759	75.5066	86.499	79.4067	84.9426	77.4292
AP Peak	41.2293	45.5017	42.9382	48.7976	39.9475	53.894	48.523	51.3	53.894	37.8723	43.9148	40.9546	40.3748	37.6587	43.6096	36.9263
AP Rise Time	0.492	0.454	0.442	0.668	0.556	0.576	0.552	0.534	0.628	0.502	0.708	0.514	0.588	0.616	0.684	0.562
AP Halfwidth	0.7196	0.654	0.5506	0.6444	0.8014	0.9514	0.7944	0.7706	0.831	0.7522	0.676	0.7794	0.8824	0.963	0.802	0.8378
AHP Amplitude	-13.2446	-14.5569	-15.2588	-18.6157	-9.58252	-15.3198	-9.33838	-12.6038	-17.3035	-13.8855	-22.4609	-13.7329	-3.75366	-14.0686	-12.97	-15.1062
AHP time	1.54	1.4	1.26	1.54	1.78	2.24	1.72	1.68	3.52	1.76	1.82	1.76	1.88	2.7	2.06	1.96
Sag	1.11097	1.39477	1.39584	3.4776	2.9515	7.30825	5.96115	3.04053	6.07832	1.06332	2.59679	2.64869		8.49462	2.78852	1.46579
Max instantaneous	70.4225	223.214	177.305	149.254	222.222	211.864	231.481	211.864	174.825	162.866	93.633	215.517	276.243	170.068	138.889	215.517
Max steady-state	38.3321	54.9982	61.6646	48.3317	61.6646	96.6634	76.6641	66.6644	73.3309	66.66	44.9955	69.9907	58.3275	83.3222	63.3249	86.6551

## Sheet: young adult - WT
Vm	-67.6273	-73.2368	-80.625	-71.1686	-78.8123	-76.4162	-79.3304	-75.8471	-79.1239	-82.1685	-86.0022	-75.7726	-97.7644
Rm	197.787	191.337	282.91	159.922	147.112	88.0554	146.277	256.4	266.855	321.225	282.412	221.728	252.531
Time Constant	6.61963	7.72697	5.59458	9.82538	4.69767	7.23742	25.0161	10	10.1162	3.71886	7.40098	3.86338	3.97227
Rheobase	121.265	100.587	90.8437	151.438	182.175	293.007	182.139	100.296	70.3067	50.7168	70.4866	90.418	40.4044
AP Threshold	-39.1052	-30.6458	-34.8816	-23.1079	-46.3684	-23.5718	-37.3657	-38.8489	-39.7491	-35.2905	-42.6117	-28.2776	-58.1848
AP Amplitude	77.771	83.075	84.3201	70.9595	93.1213	79.3579	89.6728	92.041	94.9249	77.2827	92.4469	65.6006	88.4277
AP Peak	38.6658	52.4292	49.4385	47.8516	46.7529	55.7861	52.3071	53.1921	55.1758	41.9922	49.8352	37.323	30.2429
AP Rise Time	0.662	0.574	0.552	0.694	0.538	0.728	0.538	0.504	0.53	0.648	0.542	0.668	0.468
AP Halfwidth	1.0266	0.813	0.8112	0.656	0.817	0.8492	0.8338	0.8186	0.8442	1.1034	0.8948	1.017	0.6664
AHP Amplitude	-7.20215	-14.74	-15.9607	-22.4304	-10.4675	-20.6299	-12.5732	-11.9019	-12.3596	-12.3901	-11.6882	-14.3433	-13.031
AHP time	2.26	1.94	1.88	1.86	2.06	2.76	2.18	2.42	1.96	2.5	2.16	2.5	1.56
Sag	7.93789	2.45089	3.06043	3.58351	2.52276	4.2726	1.77652	12.4079	2.42166	1.94611	1.23041	3.66713	2.00205
Max instantaneous	183.824	152.905	166.667	104.167	196.85	116.822	163.934	177.936	193.798	159.744	173.01	171.821	132.275
Max steady-state	66.6644	44.9985	66.6644	36.6654	59.998	53.3316	46.6651	63.3312	63.3312	58.3275	71.6595	121.65	66.66
