# Supplementary material for: Corticohippocampal circuit dysfunction in a mouse model of Dravet syndrome
Source: eLife. 2022 Feb 25;11:e69293. doi: 10.7554/eLife.69293 (PMC8920506; doi:10.7554/eLife.69293)
Supplement: Table 2—source data 1. [file elife-69293-table2-data1.xlsx]

## Sheet: early postnatal - Scn1a
Vm	-57.4967	-59.1301	-64.3647	-47.3996	-50.3447	-50.3447	-56.6553	-59.1301	-68	-61	-55	-60	-64
Rm	125.493	147.416	68.0496	110.223	126.314	126.314	50.2306	147.416	33.1841	76.3517	49.4749	107.28	53.6815
Time Constant	7.19465	6.10519	4.5695	7.99023	7.61006	7.61006	9.96314	6.10519	4.20307	1.88744	2.23085	1.89888	1.56165
Rheobase	351.319	401.872	404.812	551.253	602.06	602.06	1003.53	401.872	1500	350	250	250	550
AP Threshold	-32.605	-30.1636	-47.9218	-20.1843	-26.0986	-26.0986	-22.3267	-30.1636	-63.9984	-42.1173	-41.6168	-34.9457	-45.6879
AP Amplitude	61.6882	68.0969	64.5233	55.8899	70.99	70.99	63.8001	68.0969	79.5013	60.672	56.8756	51.059	62.2589
AP Peak	29.0833	37.9334	16.6016	35.7056	44.8914	44.8914	41.4734	37.9334	15.5029	18.5547	15.2588	16.1133	16.571
AP Rise Time	0.608	0.588	0.442	0.638	0.552	0.552	0.468	0.588	2.447	0.407	0.459	0.557	0.437
AP Halfwidth	0.693	0.5948	0.4294	0.7426	0.5672	0.5672	0.438	0.5948	0.5415	0.3771	0.5016	0.5248	0.4036
AHP Amplitude	-8.02612	-10.7727	-11.1694	-5.49316	-8.11768	-8.11768	-16.9983	-10.7727	1.80054	-17.334	-13.7939	-17.7002	-12.0239
AHP time	1.72	1.42	2.02	1.82	1.26	1.26	1.98	1.42	1.35	0.97	2.48	1.54	1.29
Sag	5.2512	8.17855	15.4044	8.74946	11.0166	11.0166	9.27031	8.17855	7.85438	5.73874	27.6626	8.7953	16.7926
Max instantaneous	198.413	175.439	138.122	180.505	168.919	168.919	166.667	175.439	151.286	250.627	173.611	173.913	227.79
Max steady-state	189.968	99.9833	118.318	111.644	94.9842	94.9842	129.974	99.9833	128.331	229.996	158.331	153.331	198.33

## Sheet: early postnatal - WT
Vm	-58.3584	-68.2805	-67.5572	-65.6983	-62.7042	-48.5385	-67.3917	-50.1852	-66.015	-60
Rm	21.5816	40.3601	40.0603	56.9039	56.678	31.6281	75.7915	76.9158	57.8229	76.5101
Time Constant	1.52823	10	2.76975	3.04519	0.772768	6.90823	4.69358	6.90033	8.24179	2.2578
Rheobase	454.775	1010.46	1111.92	1053.97	1536.67	250.682	702.469	751.702	606.844	550
AP Threshold	-51.3611	-49.118	-44.2322	-37.1979	-64.2517	-39.8315	-42.0654	-36.7188	-58.1299	-34.671
AP Amplitude	69.4885	70.3583	54.0588	37.2589	66.9067	53.3508	75.116	76.7883	68.2617	46.8781
AP Peak	18.1274	21.2402	9.82666	0.0610352	2.65503	13.5193	33.0505	40.0696	10.1318	12.207
AP Rise Time	0.404	0.33	0.338	0.406	1.128	0.414	0.546	0.572	0.396	0.427
AP Halfwidth	0.428	0.2884	0.3356	0.4266	0.6494	0.3552	0.5216	0.5358	0.3404	0.4267
AHP Amplitude	-3.38745	-13.5498	-11.5967	-7.87354	22.1558	-15.2588	-10.1013	-8.3313	-7.93457	-15.8997
AHP time	1.9	0.78	0.94	1.08	1.2	0.82	1.22	1.24	0.86	1.12
Sag	42.389	22.6376	20.084	64.6822	49.9603	35.2728	9.55121	8.87552	6.35005	3.94316
Max instantaneous		328.947	230.415		304.878	331.126	224.215	219.298		298.507
Max steady-state	131.649	279.953	206.632	144.976	259.948	321.602	159.968	154.969	228.303	246.663

## Sheet: young adult - Scn1a
Vm	-62.6035	-46.6994	-61.4778	-57.1038	-71.4264	-57.2855	-57.9883	-45.5345	-55.519	-61.1698	-47.0005	-56.6052	-65.5532	-59.1905	-67.8009	-44.2968	-61.269	-57.9564
Rm	123.634	97.568	69.6881	162.564	120.021	123.085	109.567	69.7519	123.464	75.7427	138.241	99.5057	82.9354	107.813	108.519	87.8526	113.685	76.9064
Time Constant	5.01473	4.80811	5.19187	7.22495	6.66223	8.72661	6.35315	4.45428	6.98824	9.17633	5.71486	6.66105	6.30159	7.66364	6.76927	4.65492	6.6889	6.26651
Rheobase	300.636	500.609	800.971	300.235	400.747	400.54	400.502	801.455	500.08	600.182	600.126	500.12	600.686	500.074	300.173	400.513	399.864	500.101
AP Threshold	-53.9368	-65.802	-42.334	-49.5392	-48.3337	-50.1831	-45.0226	-55.4321	-54.7913	-50.5768	-56.8665	-44.9341	-49.5728	-48.4406	-46.5759	-56.8024	-43.0695	-45.2728
AP Amplitude	82.7759	88.5376	70.5017	82.9865	77.3865	80.5481	75.9979	79.7852	81.6772	74.8688	80.0598	68.6157	65.9302	75.6928	64.6423	70.108	68.5516	63.6139
AP Peak	28.8391	22.7356	28.1677	33.4473	29.0527	30.365	30.9753	24.353	26.886	24.292	23.1934	23.6816	16.3574	27.2522	18.0664	13.3057	25.4822	18.3411
AP Rise Time	0.386	1.238	0.728	0.734	0.384	0.396	0.454	0.736	0.676	0.574	0.836	0.488	1.462	0.494	0.382	1.238	0.522	0.37
AP Halfwidth	0.3548	0.2736	0.2692	0.3076	0.3202	0.3676	0.3666	0.3384	0.3124	0.4286	0.3738	0.3648	0.5346	0.302	0.3906	0.3808	0.3754	0.2988
AHP Amplitude	-10.376	3.75366	-17.4866	-14.5264	-14.2822	-11.9324	-12.9089	-8.11768	-10.3149	-10.0708	-11.6272	-11.7798	-8.17871	-16.2659	-14.2212	-7.96509	-12.8174	-16.1438
AHP time	0.94	0.66	0.8	0.82	0.8	1.22	1.08	0.9	0.82	1.28	0.88	1.26	1.56	0.74	1.12	0.94	1.04	0.84
Sag	13.2414	18.6814	7.73982	9.96496	4.0928	3.48785	7.91555	18.0181	8.81437	9.01353	5.03137	6.00913	7.41841	8.71861	4.29311	16.9654	7.53029	5.4666
Max instantaneous	304.878	297.619	158.228	314.465	297.619	154.799	154.799	200.803	306.748	240.385	226.244	193.05	165.563	303.03	215.517	322.581	190.84	220.264
Max steady-state	209.993	186.66	101.663	253.325	208.326	138.329	141.662	179.994	256.658	214.993	158.328	164.995	136.662	238.325	186.66	273.324	153.328	199.993

## Sheet: young adult - WT
Vm	-61.1866	-55.2647	-46.8683	-39.5925	-54.1692	-46.1781	-51.6165	-53.7237	-56.6203	-56.6993	-67.7943	-66.0631	-70.7955	-59.888	-54.3167	-61.9713	-59.9943	-61.992	-61.2333
Rm	114.014	140.869	137.605	100.61	114.082	111.391	112.136	90.0329	59.8485	109.011	100.981	120.583	63.0283	116.04	106.623	105.979	66.8449	45.828	103.351
Time Constant	5.2385	5.82674	5.91659	4.66778	4.93024	5.48296	6.36391	6.47561	1.98114	5.53417	6.29211	5.96737	7.49753		5.75878	2.76363	3.21174	2.98896	5.0087
Rheobase	202.198	303.3	404.492	506.209	405.25	303.413	405.273	506.227	606.365	405.044	505.82	404.883	707.307	404.599	505.9	303.428	606.278	808.897	505.868
AP Threshold	-44.7235	-49.2065	-49.9969	-49.4446	-54.9377	-46.0022	-47.3145	-47.3694	-64.5538	-51.4679	-41.8549	-39.4165	-48.7854	-41.8793	-38.269	-45.05	-52.7222	-64.1357	-53.8452
AP Amplitude	80.1544	89.0015	80.1788	80.7251	83.5022	79.0527	68.5547	74.6521	88.1134	77.9572	67.7338	61.9385	71.582	67.6361	67.0471	71.1426	81.958	80.2185	90.1917
AP Peak	35.4309	39.7949	30.1819	31.2805	28.5645	33.0505	21.2402	27.2827	23.5596	26.4893	25.8789	22.522	22.7966	25.7568	28.7781	26.0925	29.2358	16.0828	36.3464
AP Rise Time	0.394	0.438	0.602	0.472	0.432	0.402	0.362	0.382	1.058	0.43	0.39	0.416	0.436	0.462	0.424	0.454	0.456	1.016	0.418
AP Halfwidth	0.3966	0.3776	0.357	0.3184	0.3534	0.3394	0.3494	0.3328	0.4086	0.351	0.3866	0.3794	0.362	0.434	0.427	0.4652	0.363	0.4112	0.2858
AHP Amplitude	-15.5334	-5.92041	-12.0239	-15.6555	-11.8713	-13.2446	-10.9253	-9.42993	2.92969	-11.5356	-15.686	-12.9395	-10.0708	-12.2375	-7.99561	-5.98145	-6.28662	3.14331	-12.3596
AHP time	1.04	0.8	0.86	0.82	0.88	0.84	0.98	0.78	0.9	0.9	0.98	0.98	0.84	1.14	1.12	1.28	0.9	0.86	0.7
Sag	18.1262	25.5409	7.98589	9.15494	16.5044	10.6805	44.1667	34.6087	25.3326	4.55293	11.8626	8.5256	15.9081	17.0843	18.2772	27.1795	10.5027	10.2032	12.9576
Max instantaneous	265.957	342.466	347.222	349.65	326.797	331.126	306.748	370.37	324.675	303.03	233.645	226.244	265.957	190.114	180.505	265.957	340.136	367.647	316.456
Max steady-state	201.66	206.66	219.993	269.991	186.66	203.327	214.993	306.656	204.993	154.995	131.662	136.662	121.663	128.329	118.329	136.662	221.659	218.326	244.992
